# Supplementary material
Source: PubMed Central journal article supplement (PMC3877715)
Supplement: NIHMS529324-supplement-01.pdf [file NIHMS529324-supplement-01.pdf]

## Extended Data Figure Legends

**Extended Data Figure 1 | YTH domain family members are m<sup>6</sup>A-specific RNA binding proteins.** **a**, Western blot showing YTHDF1 and YTHDF3 pulled down with an m<sup>6</sup>A-containing RNA probe. \*Thiol-substituted phosphodiester bonds were used to prevent enzymatic cleavage. **b**, LC-MS/MS showing that m<sup>6</sup>A was enriched in GST-YTHDF1- or GST-YTHDF3-bound mRNA while depleted in the flow-through portion. **c-d**, Gel shift assay measuring the dissociation constant (K<sub>d</sub>, nM, indicated at the upper left corner of the gel) of GST-tagged YTH domain family proteins (**c**, YTHDF2; **d**, YTHDF1 and YTHDF3) with methylated and unmethylated RNA probes. 4 nmol RNA probe was labeled with <sup>32</sup>P and the protein concentration ranged from 20 nM to 5 μM. K<sub>d</sub> (nM) values were indicated at the upper left corner of the gel.

**Extended Data Figure 2 | Features and comparisons of YTHDF2 PAR-CLIP data with**

**RIP and m<sup>6</sup>A-seq.** **a**, Left: PAR\_CLIP gel image showing <sup>32</sup>P-labeled RNA-YTHDF2 complex; Right: western blotting of HeLa cell lysate with over-expression of flag-tagged YTHDF2 (10 µg per lane): upper band was detected by anti-flag antibody; lower band was detected by anti-GAPDH antibody. **b**, Overlap of transcripts identified by PAR-CLIP and RIP-seq of YTHDF2. **c-d**, YTHDF2 binding motif identified by MEME with top 1,000 scored PAR-CLIP peaks under different motif searching parameters. **c**, With motif length restricted to [5-10] bp,  $p = 1.1 \text{ e-}43$ , 183 sites were found under this motif. **d**, The motif length was restricted to [5-12] bp. The motif with lowest  $p$ -value was shown in main text as Fig. 1c, this motif showed the second lowest  $p$ -value,  $p = 5.1 \text{ e-}14$ , 104 sites were found. **e**, With [7-12],  $p = 7.5 \text{ e-}42$ , 231 sites were found under this motif. **f**, Distribution of PAR-CLIP peaks across the length of mRNA. Each region of 5'UTR, CDS, and 3'UTR were binned into 50 segments, and the percentage of PAR-CLIP peaks that fall within each bin was determined. **g**, Overlap of YTHDF2 PAR-CLIP peaks with m<sup>6</sup>A peaks in different sub-transcript regions. Over 70% PAR-CLIP peaks in 5UTR, CDS, stop codon, and 3UTR regions overlap with m<sup>6</sup>A peaks (at least 1 bp overlap). In contrast, only 20%~30% of PAR-CLIP peaks in transcription starting sites (TSS) and intergenic regions coincide with m<sup>6</sup>A peaks. **h**, Enrichment of YTHDF2 PAR-CLIP peaks in long exons. The length distribution of exons that contain YTHDF2 PAR-CLIP peaks (red) shifts to larger size compared with the length distribution of all exons in human genome (black).

### **Extended Data Figure 3 | Effects of YTHDF2 knockdown and summary of the**

**sequencing data.** **a**, The YTHDF2 knockdown efficiency is about 80% as detected by

RT-PCR (error bars, mean±s.t.d.,  $n = 3$ , biological replicates) and RNA-seq. Although at current stage we could not identify a reliable antibody for YTHDF2, ribosome-profiling of YTHDF2 did indicate that the translation level of YTHDF2 decreased by 80% after siRNA knockdown. RT-PCR results were normalized to that of GAPDH as an internal control. RNA-seq and ribosome profiling results were calculated by actual RPKM. **b**, YTHDF2 knockdown led to decreased translation efficiency of its targets due to the accumulation of non-translating mRNA. Translation efficiency is calculated as the ratio of ribosome-protected fragments and mRNA input.  $P$  value was calculated by using Mann-Whitney U test (two-tailed, significance level = 0.05). **c**, Multiple pairwise comparisons (Kruskal-Wallis test) by using the Steel-Dwass-Critchlow-Fligner procedure (two-tailed, significance level = 0.05). **d**, The regional effect of the YTHDF2-binding site is not significant. Cumulative distribution showing mRNA lifetime  $\log_2$ -fold changes ( $\Delta$ ) between si-YTHDF2 and si-control for non-targets and CLIP-IP common targets with major CLIP peak at 5UTR, CDS, 3UTR, intron, and non-coding RNA. Except for intron, other regions show similar fold changes (also see Extended Data Fig. 3c). **e**, The m<sup>6</sup>A methyltransferase (MT-A70) and demethylase (FTO) remain unchanged with YTHDF2 knockdown.

**Extended Data Figure 4 | Validation of representative YTHDF2 RNA targets. a-d**, Examples of transcripts harboring m<sup>6</sup>A peaks and YTHDF2 PAR-CLIP peaks: *SON* (CDS, **a**), *CREBBP* (3'UTR, **b**), *LDLR* (3'UTR, **c**), *PLAC2* (non-coding RNA, **d**). Coverage of m<sup>6</sup>A IP and input fragments are indicated in red and blue, respectively. YTHDF2 PAR-CLIP peaks are highlighted in green. Black lines signify CDS borders. **e-n**, relative RNA level quantified

by gene-specific RT-PCR, and error bars shown in these figure panels are mean  $\pm$  s.t.d.,  $n = 6$  (two biological replicates  $\times$  three technical replicates). **e**, Enrichment fold of *SON*, *CREBBP* mRNA, and *PLAC2* RNA in YTHDF2-RNA co-IP versus RNA-protein input control, and in m<sup>6</sup>A *in vitro* IP versus mRNA input control. **f**, Relative changes of *SON*, *CREBBP* mRNA, and *PLAC2* RNA in siYTHDF2 sample versus siControl, and over-expression of YTHDF2 versus over-expression of C-YTHDF2. **g-k**, Lifetimes of *SON*, *CREBBP* mRNA, and *PLAC2* RNA under siYTHDF2 versus siControl. **l-n**, YTHDF2 knockdown altered the cytoplasmic distribution of its mRNA targets. The *SON* (**l**) and *CREBBP* (**m**) mRNA levels decreased in the non-ribosome mRNP portion but increased in the 40-80S portion under siYTHDF2 compared to siControl. However, they showed different changes in the polysome portion. *RPL30* (**n**) is not a target of YTHDF2 and did not show an increase in the 40-80S portion.

**Extended Data Figure 5 | Knockdown of METTL3 (MT-A70) led to less binding of YTHDF2 to its targets and increased stability of its target RNAs similar to that of YTHDF2 knockdown.** **a**, Western blotting showing that the knockdown efficiency of siMETTL3 at 48 h was ~80%. **b-g**, relative RNA level quantified by gene-specific RT-PCR, and error bars shown in these figure panels are mean  $\pm$  s.t.d.,  $n = 6$  (two biological replicates  $\times$  three technical replicates). **b**, Percentages of YTHDF2 targets (*SON*, *CREBBP*, *LDLR*) in YTHDF2-bound portion vs unbound portion decreased significantly after METTL3 knockdown for 48 hours. After 24 h transfection of METTL3 siRNA, HeLa cells were transfected with flag-tagged YTHDF2, and cells were collected after another 24 h. Anti-flag beads were used to separate YTHDF2-bound portion (IP) from unbound portion

(flow-through). Each transcript was quantified by RT-PCR. **c**, Relative changes of *SON*, *CREBBP*, and *LDLR* mRNA in siMETTL3 sample versus siControl. **d-g**, Lifetimes of *SON*, *CREBBP*, and *LDLR* mRNA under siMETTL3 versus siControl.

**Extended Data Figure 6 | Co-localization of YTHDF2 with protein markers of P bodies, stress granules, and deadenylation complexes. a-h**, Fluorescence immunostaining of flag-tagged YTHDF2 (green, anti-flag, Alexa 488) and other protein markers (DCP1a and GW182 for P bodies and eIF3 for stress granule, DDX6 (also known as RCK/p54) and HuR for both, CNOT7, PAN2, and PARN for deadenylation complex; magenta of Alexa 647 is the color for the marker, green + magenta = white for the co-localization spot). The scale of the magnified region (white frame) is  $1.8 \mu\text{m} \times 1.8 \mu\text{m}$ . **i**, Co-localization between YTHDF2 and different protein markers were characterized by Pearson's coefficient, for each pair,  $n = 5\sim 7$ . YTHDF2 appears to have better co-localization with P bodies than stress granules. It also appears to co-localize best with CNOT7 (also known as CAF1 or POP2) which is a sub-unit of the CCR4-NOT deadenylation complex. **j**, Western blotting results showing that immunoprecipitation (IP) of flag-tagged full length YTHDF2 and N-YTHDF2 (N-terminal domain) also pulled down the p-body marker DCP2, but not with mock control or C-YTHDF2 (the C-terminal domain). For IP samples, each lane was loaded with 2  $\mu\text{g}$  IP portion; and the input lane was loaded with 10  $\mu\text{g}$  Input portion which corresponded to  $\sim 1\%$  of overall input). **k**, Comparison of P/Q/N (highlighted) rich regions of YTHDF1-3 with other aggregation-prone proteins. **l**, C-YTHDF2 is capable of selective binding of  $\text{m}^6\text{A}$ -containing RNA. LC-MS/MS showing that  $\text{m}^6\text{A}$ -containing RNA was enriched in the His6-tagged

C-YTHDF2-bound mRNA while reduced in the flow-through portion. Error bars shown in the figure are mean  $\pm$  s.t.d.,  $n = 4$  (two biological replicates  $\times$  two technical replicates).

**Extended Data Figure 7 | Tether assay of the N-terminal domain of YTHDF2. a,** Structural presentation of the two domains of YTHDF2. **b,** Scheme of the reporter assay: the RNA reporter vector encodes *firefly* luciferase (F-luc) as the primary reporter and *Renilla* luciferase (R-luc) on the same plasmids acting as transfection control for normalization. Five Box B RNA elements were inserted at the 3'UTR of F-luc as positive tether reporter (noted as F-luc-5BoxB); the effector was a fusion of N-YTHDF2 and  $\lambda$  peptide which recognizes Box B with high affinity. **c,** The F-luc luciferase activity (protein translation) for N-YTHDF2- $\lambda$  was reduced by  $\sim 20\%$  compared to that of N-YTHDF2 and  $\lambda$  controls. Error bars shown in the panel are mean values  $\pm$  s.t.d. from  $n = 8$  (biological replicates). **d-e,** The reporter mRNA lifetime was significantly reduced ( $\sim 40\%$ ) when bound by N-YTHDF2- $\lambda$  as compared to the controls of N-YTHDF2 and  $\lambda$ . Doxycycline (Dox, 400 ng/uL) was used to inhibit transcription of the reporter. 18 hours post transfection of reporter and effectors, Dox was removed to allow a pulse transcription of F-luc-5BoxB for 4 hours. Then Dox was added back and the samples were collected at indicated time point. The amounts of F-luc-5BoxB were determined by RT-PCR, normalized to R-luc, then for each time series, samples at  $t = 0$  h were set as 100%. Error bars shown in the panel are mean  $\pm$  s.t.d.,  $n = 6$  (two biological replicates  $\times$  three technical replicates). **f,** Scheme of poly(A) tail length assay. **g-h,** tethering N-YTHDF2 to the reporter mRNA does not significant trigger deadenylation of the reporter. The PCR products of reporter poly(A) tail were visualized in 10% TBE gel stain (**g**) and no

significant difference of the deadenylation rate was observed (**h**). **i-l**, Shorter poly(A) tail lengths were observed in the YTHDF2-bound fraction for the N-YHTDF2-tethered reporter RNA (**i** and **j**) as well as the native target RNA *CREBBP* (**k** and **l**). Tether reporter F-luc-5BoxB and flag-tagged YTHDF2-N- $\lambda$  (**i**) or full length flag-tagged YTHDF2 (**k**) were expressed in HeLa cells, and subjected to IP with anti-flag beads. RNA recovered from input, IP, and flow-through were further processed and the final PCR products for F-luc-5BoxB (**i**) or *CREBBP* (**k**) were visualized in 10% TBE gel. **j** and **l**, each lane were re-plotted against base pair, after *log* fitting of relative gel mobility with base pairs.

**Extended Data Figure 8 | Cellular function of YTHDF2. a-b**, The top molecular function of YTHDF2 targets is “Gene Expression and RNA Transcription”, and the top cellular function is “Cell Death and Survival”. Ingenuity Pathway Analysis of function category of YTHDF2 targets and non-targets revealed that the two gene groups are heterogeneous in their functional composition. (\* top two functions for YTHDF2 targets and \*\* top two functions for YTHDF2 non-targets.). **c-d**, Pie charts of molecular types of differentially expressed YTHDF2 targets (**c**) versus non-targets (**d**) upon YTHDF2 knockdown. Differentially expressed genes ( $p$ -value < 0.05) caused by YTHDF2 knockdown were grouped to YTHDF2 targets (796 gene) and non-targets (1554) based on their presence or absence in YTHDF2 PAR-CLIP binding sites, and subject to Ingenuity Pathway Analysis (the category “other” were not shown). The results show that the group of YTHDF2 targets is transcription regulators while that of non-targets is enzyme, indicating that m<sup>6</sup>A may significantly affect gene expression via tuning mRNA stabilities of transcription factors through YTHDF2. **e-f**,

YTHDF2 knockdown led to reduced cell viability. The IPA analysis of ribosome profiling data of YTHDF2 knockdown (48 h) versus control predicts decreased cell viability (e). Ribosome profiling data was chosen since it may better reflect the translation status. MTT assay provided experimental evidence of reduced cell viability upon YTHDF2 knockdown. *p*-Values that calculated from Student's *t*-test were 0.036,  $4.7 \times 10^{-4}$ , and  $9.4 \times 10^{-4}$ , at 48 h, 72 h and 96 h respectively (f). Error bars shown in the figure are mean  $\pm$  s.t.d.,  $n = 10$  (biological replicates).

**Extended Data Figure 9 | Comparisons of sequencing data with replicates.** a, Overlap of three biological replicates (rep1~3) for PAR-CLIP. Numbers showing the sum of genes identified in each sample. b, Correlation of enrichment fold as  $\log_2(\text{IP}/\text{input})$  between two technical RIP replicates. In rep1 the input mRNA was purified by poly(dT) beads, while in rep2 the input RNA was processed by rRNA removal. c-e, Box plot showing consistent results from two biological replicates that were conducted for ribosome profiling and mRNA lifetime profiling, respectively. For mRNA lifetime profiling, rep1 was normalized by spike-in control that proportional to cell numbers, while rep2 was normalized by spike-in that proportional to total RNA concentrations. Despite the technical variations, YTHDF2 knockdown resulted in significant lifetime increase of its targets. (T, 1,277 CLIP+RIP targets; NT, 3,905 non-targets; box, the first and third quartiles; notch, the median; dot in the box: the data average; whisker,  $1.5 \times$  standard deviation; cross, the 1 and 99 percentiles; short line, the max and min; *p* values were calculated by Mann-Whitney U test, two tailed, significant level = 0.05). f-h, Correlation of RPKM between technical mRNA input samples prepared by



poly(A) selection ( $x$  axis) and by rRNA removal ( $y$  axis), which are comparable to the variations between biological replicates that prepared by the same mRNA selection method.

**Extended Data Table 1 | Summary of the sequencing samples.**

**Supplementary Table 1 | Summary of processed sequencing results (PAR-CLIP, RIP, ribosome and mRNA lifetime profiling).**

Containing source data related to Figure 2a-d.

| Category                                                                        | Gene symbol | PAR-CLIP / Peak sum |      |      |
|---------------------------------------------------------------------------------|-------------|---------------------|------|------|
|                                                                                 |             | rep1                | rep2 | rep3 |
| <b>I: Non-targets.</b><br><b>II: CLIP targets.</b> <b>III: CLIP+IP targets.</b> |             |                     |      |      |
| <b>II + III</b>                                                                 | A4GALT      | 1                   | 3    | 12   |
| III                                                                             | AAAS        |                     |      |      |
| III                                                                             | AACS        | 1                   |      |      |
| III                                                                             | AADAT       |                     |      | 1    |
| III                                                                             | AAED1       |                     |      | 1    |
| III                                                                             | AAGAB       |                     | 1    |      |
|                                                                                 | AAK1        |                     | 3    | 2    |
| III                                                                             | AAMP        |                     | 1    | 3    |
| <b>II</b>                                                                       | AARS        | 4                   | 2    | 13   |
|                                                                                 | AARS2       | 1                   |      | 3    |
|                                                                                 | AASDH       |                     |      |      |
| III                                                                             | AASDHPPT    |                     |      |      |
| III                                                                             | AATF        |                     |      | 1    |
|                                                                                 | ABCA13      |                     | 2    | 2    |
| <b>II</b>                                                                       | ABCA2       | 1                   | 3    | 4    |
| III                                                                             | ABCA3       |                     | 2    | 1    |
|                                                                                 | ABCA5       |                     |      | 1    |
| III                                                                             | ABCA7       |                     |      | 1    |
|                                                                                 | ABCB10      | 1                   |      | 1    |
| <b>II</b>                                                                       | ABCB6       | 3                   | 4    | 2    |
|                                                                                 | ABCB7       | 1                   |      |      |
| III                                                                             | ABCB8       |                     |      | 2    |
|                                                                                 | ABCB9       |                     |      |      |
| <b>II + III</b>                                                                 | ABCC1       | 5                   | 8    | 11   |
| <b>II</b>                                                                       | ABCC10      | 1                   | 2    | 2    |
| III                                                                             | ABCC3       |                     | 2    |      |
|                                                                                 | ABCC4       | 1                   |      | 1    |
| III                                                                             | ABCC5       |                     |      |      |
| <b>II</b>                                                                       | ABCD1       | 2                   | 1    | 6    |
|                                                                                 | ABCD3       |                     |      |      |
| III                                                                             | ABCD4       |                     |      |      |
| <b>II</b>                                                                       | ABCE1       | 1                   | 3    | 4    |
| <b>II</b>                                                                       | ABCF1       | 10                  | 10   | 11   |
| <b>II</b>                                                                       | ABCF2       | 4                   | 3    | 11   |
| III                                                                             | ABCF3       |                     |      | 2    |
| III                                                                             | ABCG2       |                     |      |      |
| III                                                                             | ABHD10      |                     | 2    |      |
|                                                                                 | ABHD11      |                     |      | 1    |
| <b>II</b>                                                                       | ABHD12      | 2                   | 8    | 6    |
| <b>II + III</b>                                                                 | ABHD13      | 2                   | 4    | 7    |

|          |         |   |    |    |
|----------|---------|---|----|----|
| II       | ABHD14B | 1 | 2  | 2  |
| II + III | ABHD15  | 3 | 2  | 4  |
| III      | ABHD16A |   | 1  |    |
| II       | ABHD2   | 1 | 5  | 2  |
|          | ABHD3   |   | 1  |    |
| II       | ABHD4   | 1 | 3  | 6  |
|          | ABHD5   |   |    |    |
|          | ABHD6   |   | 1  | 1  |
|          | ABHD8   |   |    | 4  |
| III      | ABI1    |   |    | 1  |
|          | ABI2    |   | 1  | 4  |
| II + III | ABL1    | 9 | 19 | 25 |
| II + III | ABL2    | 8 | 11 | 18 |
|          | ABLIM1  |   | 4  | 4  |
| III      | ABLIM2  |   |    |    |
| II       | ABR     | 3 | 5  | 11 |
| III      | ABRACL  |   |    |    |
| II       | ABT1    | 1 | 2  | 5  |
| II       | ABTB2   | 1 | 1  | 3  |
| III      | ACAA1   |   |    |    |
| III      | ACAA2   |   |    |    |
|          | ACACA   |   | 5  | 6  |
|          | ACACB   |   |    |    |
|          | ACAD10  |   | 1  | 1  |
|          | ACAD8   |   |    |    |
|          | ACAD9   |   |    | 2  |
| III      | ACADM   |   | 2  | 3  |
| III      | ACADS   |   |    | 3  |
| III      | ACADSB  |   |    |    |
| III      | ACADVL  |   | 1  |    |
|          | ACAP2   |   |    |    |
| III      | ACAP3   |   |    |    |
| III      | ACAT1   |   |    | 1  |
| III      | ACAT2   |   |    |    |
|          | ACBD3   |   | 2  | 5  |
| III      | ACBD4   |   |    |    |
|          | ACBD5   |   |    | 1  |
| III      | ACBD6   |   |    | 1  |
| III      | ACCS    |   |    |    |
| III      | ACD     |   |    | 1  |
|          | ACER3   |   | 2  |    |
| II       | ACIN1   | 5 | 10 | 18 |
| II       | ACLY    | 3 | 1  | 2  |
| III      | ACN9    |   |    |    |
| III      | ACO1    |   |    |    |
| III      | ACO2    | 1 |    | 4  |
| III      | ACOT13  |   | 2  | 1  |
|          | ACOT2   |   |    | 4  |
| III      | ACOT7   |   | 2  | 1  |
| III      | ACOT8   |   | 1  |    |
| III      | ACOT9   |   |    | 4  |

|          |         |   |   |    |
|----------|---------|---|---|----|
|          | ACOX1   | 2 |   | 3  |
|          | ACOX3   |   |   |    |
| III      | ACP1    |   | 2 | 4  |
| II + III | ACP2    | 3 | 5 | 9  |
| III      | ACP6    |   |   |    |
|          | ACPL2   |   | 2 | 3  |
| III      | ACSF2   |   | 1 |    |
| II       | ACSF3   | 2 | 1 | 6  |
|          | ACSL1   |   |   |    |
| II       | ACSL3   | 4 | 5 | 4  |
|          | ACSL4   |   |   | 3  |
| III      | ACSS2   |   |   | 1  |
| III      | ACTA2   |   |   |    |
| II       | ACTB    | 4 | 5 | 7  |
| II       | ACTG1   | 4 | 9 | 8  |
| III      | ACTL6A  |   |   |    |
| III      | ACTL8   | 1 | 1 |    |
| III      | ACTN1   | 1 |   | 4  |
| II       | ACTN4   | 4 | 5 | 7  |
| III      | ACTR10  |   |   |    |
| III      | ACTR1A  |   | 1 | 6  |
| III      | ACTR1B  |   | 1 | 3  |
| II       | ACTR2   | 1 | 4 | 6  |
| III      | ACTR3   |   | 2 | 2  |
| III      | ACTR3B  |   |   |    |
|          | ACTR5   |   |   | 1  |
| III      | ACTR6   |   |   |    |
|          | ACTR8   |   |   |    |
|          | ACVR1   |   |   | 1  |
|          | ACVR1B  |   | 6 | 7  |
|          | ACVR2B  |   |   | 3  |
| III      | ACYP1   |   |   |    |
| III      | ACYP2   |   |   |    |
| III      | ADA     |   |   |    |
| III      | ADAL    |   |   | 1  |
| II + III | ADAM10  | 1 | 2 | 5  |
| III      | ADAM15  |   |   | 2  |
|          | ADAM17  |   |   | 1  |
|          | ADAM22  |   |   |    |
|          | ADAM9   |   | 1 |    |
|          | ADAMTS1 |   | 2 | 2  |
|          | ADAMTS3 |   |   | 1  |
| II + III | ADAR    | 5 | 6 | 15 |
| II + III | ADARB1  | 3 | 4 | 10 |
|          | ADAT1   |   | 1 | 7  |
| III      | ADAT2   |   |   |    |
| III      | ADCK1   |   |   |    |
| II       | ADCK2   | 2 | 6 | 7  |
| III      | ADCK3   |   |   |    |
| III      | ADCK4   |   |   | 1  |
| II + III | ADCY3   | 2 | 1 | 4  |

|          |         |   |    |    |
|----------|---------|---|----|----|
| III      | ADCY6   |   | 1  | 2  |
| II + III | ADCY7   | 2 | 7  | 13 |
| II + III | ADCY9   | 4 | 3  | 18 |
| II       | ADD1    | 3 | 2  | 7  |
| III      | ADD2    |   | 1  | 1  |
|          | ADD3    |   |    |    |
| III      | ADH5    |   | 1  | 1  |
| III      | ADI1    |   |    | 1  |
| II       | ADIPOR1 | 1 | 2  | 4  |
| II + III | ADIPOR2 | 2 | 6  | 14 |
| III      | ADK     |   | 1  | 1  |
| II       | ADM     | 1 | 2  | 4  |
| II + III | ADNP    | 4 | 14 | 15 |
| II + III | ADNP2   | 9 | 11 | 30 |
| II + III | ADO     | 4 | 7  | 21 |
| II + III | ADPGK   | 3 | 5  | 8  |
| III      | ADPRHL1 |   |    | 2  |
| II + III | ADPRHL2 | 2 | 1  | 3  |
|          | ADRA1B  |   |    | 3  |
|          | ADRA2C  | 1 |    | 3  |
| II       | ADRBK1  | 1 | 1  | 6  |
| II       | ADRM1   | 3 | 2  | 4  |
| III      | ADSL    |   |    | 1  |
| III      | ADSS    | 1 |    | 1  |
| III      | ADSSL1  |   |    |    |
| III      | AEBP2   |   |    | 1  |
| II       | AEN     | 1 | 4  | 9  |
| II       | AES     | 1 | 2  | 5  |
| II + III | AFAP1   | 3 | 3  | 13 |
| III      | AFAP1L1 |   |    |    |
| II + III | AFF1    | 1 | 6  | 8  |
| II + III | AFF4    | 6 | 3  | 12 |
|          | AFG3L1P |   |    | 1  |
| II       | AFG3L2  | 1 | 1  | 1  |
| III      | AFMID   |   |    | 1  |
|          | AFTPH   |   | 1  | 1  |
| III      | AGA     |   |    |    |
| II       | AGAP1   | 2 | 4  | 11 |
| III      | AGAP3   |   | 1  | 3  |
| III      | AGBL5   |   |    |    |
|          | AGFG1   |   | 1  | 3  |
| III      | AGFG2   |   |    | 2  |
| III      | AGGF1   |   | 1  | 3  |
| III      | AGK     |   |    |    |
|          | AGL     |   |    |    |
| III      | AGMAT   | 1 |    |    |
| II       | AGPAT1  | 1 | 2  | 7  |
| II       | AGPAT2  | 3 | 5  | 5  |
| II       | AGPAT3  | 2 | 2  | 6  |
| II + III | AGPAT5  | 3 | 1  | 7  |
| II + III | AGPAT6  | 3 | 6  | 7  |

|          |         |   |    |    |
|----------|---------|---|----|----|
| III      | AGPAT9  | 1 |    |    |
| III      | AGPHD1  |   |    |    |
| III      | AGPS    |   | 1  |    |
| II       | AGRN    | 6 | 5  | 9  |
| II + III | AGTPBP1 | 2 | 3  | 3  |
| III      | AGTRAP  |   |    | 3  |
| III      | AGXT2L2 |   | 2  | 4  |
| II + III | AHCTF1  | 2 | 6  | 6  |
| II       | AHCY    | 4 | 6  | 7  |
| II       | AHCYL1  | 1 | 1  | 4  |
| III      | AHCYL2  |   |    | 2  |
| II + III | AHDC1   | 5 | 5  | 26 |
| III      | AHI1    |   |    |    |
| II + III | AHNAK   | 7 | 4  | 7  |
| II + III | AHNAK2  | 8 | 2  | 7  |
| II + III | AHR     | 4 | 6  | 8  |
| II + III | AHRR    | 5 | 15 | 42 |
| III      | AHSA1   |   | 2  | 4  |
| III      | AHSA2   |   |    | 1  |
| III      | AIF1L   |   |    |    |
| III      | AIFM1   |   |    |    |
| II       | AIFM2   | 1 | 1  | 4  |
| III      | AIG1    |   |    |    |
| III      | AIMP1   |   | 1  | 1  |
| II       | AIMP2   | 1 | 1  | 3  |
| III      | AIP     |   |    | 2  |
| II       | AJUBA   | 1 | 5  | 10 |
| III      | AK1     |   |    | 1  |
| III      | AK2     |   | 2  | 4  |
|          | AK3     |   | 2  | 4  |
| II + III | AKAP1   | 6 | 8  | 14 |
| II + III | AKAP10  | 2 | 1  | 2  |
|          | AKAP11  |   | 1  | 1  |
| III      | AKAP12  |   |    |    |
| II + III | AKAP13  | 6 | 7  | 18 |
|          | AKAP7   |   |    |    |
|          | AKAP8   |   | 2  | 3  |
| III      | AKAP8L  | 2 |    | 1  |
| III      | AKAP9   |   | 1  | 1  |
| III      | AKIP1   |   |    | 2  |
| III      | AKIRIN1 | 1 |    | 5  |
| III      | AKIRIN2 |   |    | 2  |
| III      | AKR1A1  |   |    | 1  |
| III      | AKR1B1  |   | 2  |    |
| III      | AKR7A2  |   | 1  | 1  |
| III      | AKT1    |   | 1  | 3  |
| III      | AKT1S1  |   |    | 3  |
| II       | AKT2    | 3 | 3  | 10 |
|          | AKT3    |   | 1  | 6  |
|          | AKTIP   |   |    |    |
| III      | ALAD    |   |    | 1  |

|          |          |   |    |    |
|----------|----------|---|----|----|
| II       | ALAS1    | 2 | 2  | 5  |
| III      | ALDH16A1 |   | 2  | 2  |
| II       | ALDH18A1 | 2 | 1  | 4  |
|          | ALDH1A3  |   |    |    |
| II + III | ALDH1B1  | 6 | 3  | 11 |
| II       | ALDH3A2  | 1 | 1  | 9  |
| II       | ALDH3B1  | 1 | 2  | 4  |
| III      | ALDH4A1  |   |    | 1  |
|          | ALDH5A1  |   | 1  | 3  |
| III      | ALDH6A1  |   |    | 1  |
| III      | ALDH7A1  |   |    |    |
| II       | ALDH9A1  | 1 | 1  | 1  |
| II       | ALDOA    | 8 | 5  | 4  |
| III      | ALDOC    |   |    |    |
| II       | ALG1     | 1 | 1  | 1  |
|          | ALG10    |   | 2  | 4  |
| II + III | ALG11    | 2 | 1  | 3  |
| II       | ALG12    | 1 | 1  | 4  |
| III      | ALG13    |   | 1  | 2  |
| III      | ALG14    |   |    |    |
| II + III | ALG2     | 7 | 6  | 11 |
| III      | ALG3     | 1 |    | 4  |
| III      | ALG5     |   | 1  | 1  |
| III      | ALG6     |   |    |    |
| III      | ALG8     |   | 1  |    |
| II       | ALG9     | 1 | 1  | 5  |
|          | ALKBH1   |   |    | 5  |
| III      | ALKBH2   |   |    |    |
| III      | ALKBH3   |   |    | 1  |
| II + III | ALKBH4   | 3 | 2  | 8  |
| II       | ALKBH5   | 4 | 6  | 8  |
| III      | ALKBH6   |   |    |    |
| III      | ALKBH7   |   |    |    |
|          | ALKBH8   |   |    | 1  |
|          | ALMS1    |   | 4  | 12 |
| II       | ALPI     | 9 | 11 | 8  |
|          | ALPK2    | 1 |    |    |
| III      | ALPL     |   |    | 1  |
|          | ALS2     |   |    | 1  |
| III      | ALYREF   |   |    | 1  |
| II + III | AMBRA1   | 4 | 5  | 14 |
|          | AMD1     | 1 |    | 2  |
| III      | AMDHD1   |   |    |    |
| III      | AMDHD2   |   |    | 1  |
| III      | AMFR     |   |    | 3  |
| II + III | AMIGO1   | 3 | 2  | 8  |
| III      | AMMECR1  | 1 |    | 2  |
| II + III | AMMECR1L | 3 | 7  | 12 |
| III      | AMN1     |   |    |    |
| II + III | AMOTL1   | 2 | 3  | 7  |
| II + III | AMOTL2   | 6 | 6  | 16 |



|          |          |    |    |    |
|----------|----------|----|----|----|
| III      | AMPD2    |    | 1  | 2  |
| III      | AMTN     |    |    |    |
| II       | AMZ2     | 1  | 1  | 2  |
|          | AMZ2P1   |    |    | 2  |
|          | ANAPC1   |    |    | 2  |
| III      | ANAPC10  |    |    | 1  |
| III      | ANAPC11  |    |    | 1  |
| III      | ANAPC13  |    |    | 1  |
| III      | ANAPC16  |    |    |    |
| III      | ANAPC2   |    | 2  | 2  |
| III      | ANAPC4   |    |    |    |
| III      | ANAPC5   |    | 1  | 1  |
| II       | ANAPC7   | 2  | 3  | 3  |
|          | ANGEL1   |    |    | 1  |
| II + III | ANGEL2   | 1  | 1  | 3  |
|          | ANKFY1   |    | 1  | 3  |
| II       | ANKH     | 6  | 3  | 15 |
|          | ANKIB1   | 1  |    | 5  |
| II + III | ANKLE2   | 12 | 8  | 16 |
|          | ANKMY2   |    |    |    |
| II + III | ANKRD10  | 1  | 2  | 4  |
| II       | ANKRD11  | 10 | 18 | 30 |
|          | ANKRD12  |    |    | 3  |
|          | ANKRD13A |    |    | 2  |
| II       | ANKRD13B | 1  | 1  | 2  |
|          | ANKRD13C |    | 1  | 5  |
| II       | ANKRD13D | 1  | 2  | 2  |
| III      | ANKRD16  |    |    | 1  |
| II       | ANKRD17  | 3  | 4  | 17 |
| III      | ANKRD2   |    |    |    |
| II       | ANKRD26  | 1  | 3  | 2  |
|          | ANKRD27  |    |    | 1  |
|          | ANKRD28  |    |    | 2  |
|          | ANKRD29  |    |    |    |
| II + III | ANKRD32  | 1  | 3  | 4  |
| II + III | ANKRD33B | 5  | 10 | 24 |
| III      | ANKRD37  |    |    |    |
| III      | ANKRD39  |    |    |    |
| II + III | ANKRD40  | 3  | 8  | 18 |
|          | ANKRD46  | 1  |    | 6  |
|          | ANKRD49  |    | 1  | 1  |
|          | ANKRD5   | 1  |    | 1  |
|          | ANKRD50  | 1  |    | 5  |
| II       | ANKRD52  | 1  | 3  | 7  |
| III      | ANKRD54  |    |    | 3  |
|          | ANKRD9   |    | 3  | 8  |
| II       | ANKS1A   | 2  | 2  | 3  |
| III      | ANKS3    |    |    |    |
|          | ANKS6    |    | 4  | 6  |
| III      | ANKZF1   |    |    |    |
| III      | ANLN     |    | 2  | 2  |

|          |        |   |    |    |
|----------|--------|---|----|----|
| III      | ANO10  |   |    | 1  |
|          | ANO2   |   |    |    |
|          | ANO4   |   |    |    |
|          | ANO6   |   | 1  | 3  |
| III      | ANO8   |   |    | 1  |
| II       | ANP32A | 1 | 3  | 4  |
| II       | ANP32B | 2 | 2  | 3  |
| III      | ANP32E |   | 1  | 2  |
| II + III | ANTXR1 | 4 | 10 | 16 |
| III      | ANXA1  |   |    |    |
| III      | ANXA11 |   |    | 2  |
| II       | ANXA2  | 2 | 1  | 2  |
| III      | ANXA3  |   |    |    |
| III      | ANXA4  |   |    |    |
| III      | ANXA5  | 1 |    | 1  |
| II       | ANXA6  | 1 | 2  | 2  |
| III      | ANXA7  |   | 1  |    |
| III      | AP1AR  |   |    | 1  |
| III      | AP1B1  |   | 2  | 2  |
| II + III | AP1G1  | 6 | 5  | 12 |
| III      | AP1M1  | 4 |    | 1  |
| III      | AP1M2  |   |    | 1  |
| III      | AP1S1  |   | 3  | 3  |
| III      | AP1S2  |   |    |    |
| III      | AP1S3  |   |    | 2  |
| II       | AP2A1  | 2 | 1  | 3  |
| III      | AP2A2  |   | 1  | 3  |
|          | AP2B1  |   | 6  | 6  |
| II       | AP2M1  | 1 | 1  | 2  |
| III      | AP2S1  |   |    | 1  |
| II       | AP3B1  | 1 | 1  | 1  |
| III      | AP3D1  | 1 |    | 4  |
| III      | AP3M1  |   | 1  | 5  |
|          | AP3M2  |   |    | 4  |
| III      | AP3S1  |   |    |    |
|          | AP4B1  |   |    |    |
|          | AP4E1  | 1 |    | 2  |
|          | AP4M1  |   | 1  | 2  |
| II + III | AP5B1  | 9 | 19 | 39 |
|          | AP5M1  | 2 |    | 3  |
|          | AP5S1  |   |    |    |
| III      | AP5Z1  |   | 1  | 1  |
|          | APAF1  |   |    |    |
|          | APBA3  |   |    | 1  |
| II + III | APBB2  | 1 | 3  | 6  |
| III      | APBB3  |   |    |    |
|          | APC    |   | 1  | 7  |
| II       | APEH   | 1 | 1  | 4  |
| II       | APEX1  | 1 | 3  | 6  |
| II       | APEX2  | 2 | 6  | 14 |
| II       | APH1A  | 1 | 5  | 12 |

|          |           |    |    |    |
|----------|-----------|----|----|----|
| III      | API5      |    | 4  | 9  |
| III      | APIP      |    |    |    |
| III      | APLP1     |    |    |    |
| II       | APLP2     | 2  | 3  | 5  |
| III      | APOA1BP   |    | 1  | 2  |
| III      | APOBEC3C  |    |    | 1  |
| III      | APOL2     | 1  |    | 2  |
| II       | APOO      | 2  | 1  | 1  |
| III      | APOOL     |    | 1  | 3  |
| III      | APOPT1    |    | 1  |    |
| II       | APP       | 3  | 3  | 6  |
|          | APPBP2    |    | 1  | 4  |
|          | APPL1     |    |    |    |
|          | APPL2     |    |    | 1  |
| II       | APRT      | 2  | 2  | 1  |
| III      | APTX      |    | 4  | 2  |
| II       | AQP3      | 1  | 6  | 3  |
|          | AQR       |    | 2  | 2  |
| III      | ARAF      |    | 2  | 4  |
| III      | ARAP1     |    |    |    |
| III      | ARAP3     | 1  |    | 2  |
| II       | ARCN1     | 3  | 6  | 10 |
| II       | ARF1      | 3  | 5  | 6  |
| III      | ARF3      |    | 3  | 8  |
| III      | ARF4      | 1  | 1  |    |
| II       | ARF5      | 1  | 1  | 2  |
| II + III | ARF6      | 5  | 11 | 11 |
| II + III | ARFGAP1   | 10 | 16 | 27 |
| II       | ARFGAP2   | 1  | 1  | 2  |
| III      | ARFGAP3   |    | 2  | 1  |
| II + III | ARFGEF1   | 1  | 2  | 1  |
| II + III | ARFGEF2   | 1  | 1  | 3  |
| III      | ARFIP1    |    |    | 2  |
| II       | ARFIP2    | 2  | 1  | 6  |
| III      | ARFRP1    |    |    | 2  |
| III      | ARG2      |    |    |    |
| II       | ARGLU1    | 1  | 2  | 5  |
| II       | ARHGAP1   | 1  | 2  | 10 |
| III      | ARHGAP10  |    |    |    |
| II       | ARHGAP11A | 3  | 6  | 11 |
|          | ARHGAP11B |    |    |    |
|          | ARHGAP12  | 1  |    | 1  |
|          | ARHGAP17  |    | 3  | 5  |
| II       | ARHGAP18  | 1  | 3  | 5  |
| II + III | ARHGAP21  | 3  | 4  | 15 |
|          | ARHGAP23  |    | 3  | 13 |
|          | ARHGAP26  |    | 1  | 3  |
| III      | ARHGAP27  |    |    | 3  |
|          | ARHGAP29  |    |    | 1  |
| II + III | ARHGAP32  | 3  | 5  | 9  |
| II + III | ARHGAP35  | 9  | 11 | 26 |

|          |           |    |    |    |
|----------|-----------|----|----|----|
|          | ARHGAP39  |    | 1  | 4  |
| III      | ARHGAP44  |    |    | 1  |
| II + III | ARHGAP5   | 5  | 6  | 15 |
| II       | ARHGDI A  | 3  | 6  | 11 |
| III      | ARHGEF1   |    |    |    |
|          | ARHGEF10  |    |    | 1  |
|          | ARHGEF10L |    |    | 1  |
| III      | ARHGEF11  |    | 4  | 5  |
| II + III | ARHGEF12  | 2  | 1  | 6  |
| III      | ARHGEF16  |    |    | 1  |
| II + III | ARHGEF17  | 2  | 5  | 13 |
| II       | ARHGEF18  | 4  | 3  | 9  |
| III      | ARHGEF19  |    |    | 2  |
| III      | ARHGEF2   |    | 1  | 2  |
| III      | ARHGEF25  |    |    |    |
|          | ARHGEF3   |    |    |    |
|          | ARHGEF4   |    | 3  | 2  |
|          | ARHGEF40  |    |    | 2  |
| II       | ARHGEF7   | 2  | 1  | 10 |
|          | ARHGEF9   |    | 1  | 1  |
| II + III | ARID1A    | 12 | 18 | 44 |
| II + III | ARID1B    | 5  | 2  | 18 |
| II + III | ARID2     | 2  | 7  | 16 |
| III      | ARID3A    |    | 1  | 2  |
| III      | ARID4A    |    | 1  | 1  |
| II       | ARID4B    | 2  | 1  | 6  |
| II + III | ARID5B    | 6  | 9  | 21 |
|          | ARIH1     |    | 2  | 7  |
| III      | ARIH2     |    | 1  | 4  |
| III      | ARL1      |    |    |    |
| III      | ARL13B    |    |    | 2  |
|          | ARL15     |    | 1  | 1  |
| III      | ARL16     |    |    |    |
| III      | ARL2      |    | 1  | 3  |
| III      | ARL2BP    |    | 1  | 1  |
| III      | ARL3      |    |    | 1  |
|          | ARL4D     |    |    | 2  |
|          | ARL5A     |    |    | 1  |
| II + III | ARL5B     | 1  | 3  | 3  |
| III      | ARL6      |    |    |    |
| II       | ARL6IP1   | 1  | 2  | 1  |
| III      | ARL6IP4   | 1  |    | 1  |
| II       | ARL6IP5   | 2  | 2  | 6  |
|          | ARL6IP6   |    |    |    |
| III      | ARL8A     |    |    | 2  |
| III      | ARL8B     |    |    | 2  |
|          | ARMC1     |    | 2  | 2  |
| III      | ARMC10    |    |    |    |
| III      | ARMC4     |    |    |    |
| II       | ARMC5     | 1  | 1  | 6  |
| II       | ARMC6     | 4  | 3  | 5  |

|          |        |   |   |    |
|----------|--------|---|---|----|
| II + III | ARMC7  | 3 | 2 | 5  |
|          | ARMC8  | 3 |   | 4  |
| III      | ARMC9  |   |   |    |
|          | ARMCX3 |   |   |    |
|          | ARMCX6 |   |   | 2  |
| III      | ARNT   |   | 2 | 4  |
|          | ARNTL  |   |   |    |
| III      | ARPC1A | 1 |   |    |
| III      | ARPC1B |   |   |    |
| III      | ARPC2  |   | 1 | 3  |
| III      | ARPC3  |   |   |    |
| III      | ARPC4  |   | 1 | 6  |
| II       | ARPC5  | 1 | 3 | 3  |
| II + III | ARPC5L | 4 | 3 | 5  |
| III      | ARPP19 |   | 3 | 6  |
|          | ARRB1  |   |   | 4  |
| III      | ARRB2  |   |   | 1  |
| III      | ARRDC1 |   |   | 2  |
| II       | ARRDC2 | 2 | 1 | 1  |
| II + III | ARRDC3 | 5 | 2 | 11 |
|          | ARSB   |   |   | 4  |
| II + III | ARSG   | 2 | 4 | 3  |
|          | ARSK   |   |   | 3  |
| III      | ARV1   |   |   |    |
|          | ARVCF  |   |   | 1  |
| III      | ASAH1  | 1 |   | 1  |
| III      | ASAP1  |   | 3 | 4  |
| II       | ASAP2  | 1 | 1 | 7  |
| III      | ASAP3  |   |   | 2  |
|          | ASB1   |   |   |    |
| II + III | ASB13  | 1 | 4 | 8  |
|          | ASB6   |   | 3 | 13 |
|          | ASB7   |   |   | 3  |
|          | ASB8   |   | 2 | 4  |
| III      | ASB9   |   |   |    |
|          | ASCC1  |   |   |    |
| II       | ASCC2  | 1 | 1 | 2  |
| II + III | ASCC3  | 3 | 3 | 2  |
| III      | ASF1A  |   |   |    |
| II       | ASF1B  | 2 | 5 | 6  |
| II + III | ASH1L  | 5 | 7 | 16 |
| III      | ASH2L  |   |   | 1  |
| III      | ASIC1  |   | 1 | 3  |
| III      | ASL    |   |   |    |
|          | ASMTL  |   |   |    |
| III      | ASNA1  |   |   | 2  |
| III      | ASNS   |   | 1 | 2  |
|          | ASNSD1 |   |   | 2  |
| III      | ASPH   |   | 1 | 2  |
| II       | ASPHD1 | 2 | 2 | 2  |
| II       | ASPM   | 1 | 2 | 4  |

|          |         |    |    |    |
|----------|---------|----|----|----|
| III      | ASPSCR1 |    |    | 2  |
| III      | ASS1    |    | 6  | 4  |
|          | ASTE1   |    | 1  | 1  |
| III      | ASUN    |    |    | 1  |
| II + III | ASXL1   | 9  | 18 | 30 |
| II + III | ASXL2   | 5  | 6  | 17 |
| III      | ATAD1   |    |    |    |
|          | ATAD2   |    |    |    |
|          | ATAD2B  |    | 1  |    |
| II       | ATAD3A  | 1  | 2  | 5  |
| III      | ATAD3B  |    | 2  | 2  |
| III      | ATAD5   |    |    |    |
|          | ATE1    |    | 1  |    |
| III      | ATF1    | 1  |    | 2  |
|          | ATF2    |    | 2  | 1  |
| II       | ATF3    | 2  | 4  | 8  |
| III      | ATF4    |    | 1  | 6  |
| II       | ATF5    | 3  | 2  | 17 |
| II       | ATF6    | 3  | 5  | 8  |
| III      | ATF6B   |    | 1  | 3  |
| II       | ATF7    | 1  | 4  | 5  |
| II + III | ATF7IP  | 2  | 4  | 6  |
|          | ATG10   |    |    |    |
|          | ATG12   |    | 1  | 4  |
| II       | ATG13   | 1  | 5  | 8  |
| III      | ATG14   |    | 1  |    |
|          | ATG16L1 |    | 2  | 1  |
| III      | ATG2A   |    | 1  | 2  |
|          | ATG2B   |    | 1  | 3  |
| III      | ATG3    | 1  |    |    |
|          | ATG4A   |    |    |    |
| II       | ATG4B   | 1  | 1  | 3  |
|          | ATG4C   |    |    |    |
| III      | ATG4D   |    |    |    |
| II + III | ATG5    | 1  | 3  | 6  |
| III      | ATG7    |    |    | 2  |
| II       | ATG9A   | 5  | 6  | 5  |
| III      | ATIC    |    |    |    |
|          | ATL2    |    | 3  | 5  |
| II       | ATL3    | 2  | 4  | 4  |
|          | ATM     |    | 1  | 1  |
| II + III | ATMIN   | 5  | 9  | 23 |
| II       | ATN1    | 3  | 8  | 24 |
| III      | ATOX1   |    |    |    |
|          | ATP10D  |    |    | 1  |
| II + III | ATP11A  | 13 | 22 | 23 |
|          | ATP11B  |    |    | 1  |
|          | ATP11C  |    |    | 1  |
| II       | ATP13A1 | 1  | 1  | 1  |
| III      | ATP13A2 |    | 3  | 2  |
|          | ATP13A3 |    | 1  | 1  |

|          |          |    |    |    |
|----------|----------|----|----|----|
| II       | ATP1A1   | 1  | 5  | 2  |
|          | ATP1A1OS |    | 1  |    |
| II       | ATP1B1   | 4  | 5  | 6  |
| II       | ATP1B3   | 4  | 5  | 4  |
| II       | ATP2A2   | 10 | 14 | 13 |
|          | ATP2A3   | 1  |    | 3  |
| II + III | ATP2B1   | 3  | 4  | 7  |
|          | ATP2B4   |    | 2  | 3  |
|          | ATP2C1   |    |    | 1  |
| III      | ATP5A1   | 1  |    |    |
| III      | ATP5B    |    | 2  | 3  |
| II       | ATP5C1   | 1  | 3  | 1  |
| III      | ATP5D    |    | 1  | 4  |
| III      | ATP5F1   | 2  |    | 2  |
| III      | ATP5G1   |    |    | 1  |
| III      | ATP5G2   |    | 2  | 2  |
| III      | ATP5G3   |    |    | 1  |
| III      | ATP5H    |    |    |    |
| III      | ATP5I    |    |    | 1  |
| III      | ATP5J    |    |    |    |
| III      | ATP5J2   |    |    | 1  |
| III      | ATP5L    |    | 2  | 1  |
| III      | ATP5O    |    |    |    |
| III      | ATP5S    |    | 1  | 2  |
| III      | ATP5SL   | 1  |    | 1  |
| II       | ATP6AP1  | 5  | 7  | 8  |
| II       | ATP6AP2  | 1  | 2  | 1  |
| III      | ATP6V0A1 |    |    | 1  |
| II       | ATP6V0A2 | 2  | 4  | 2  |
| II       | ATP6V0B  | 2  | 3  | 1  |
| II       | ATP6V0C  | 7  | 3  | 6  |
| III      | ATP6V0D1 |    | 3  | 3  |
| II       | ATP6V0E1 | 3  | 5  | 5  |
| III      | ATP6V0E2 |    | 1  |    |
|          | ATP6V1A  |    | 2  | 1  |
|          | ATP6V1B2 |    | 1  | 3  |
| III      | ATP6V1C1 |    |    |    |
| III      | ATP6V1D  |    |    |    |
| III      | ATP6V1E1 |    | 3  | 1  |
| III      | ATP6V1F  | 2  |    | 1  |
| III      | ATP6V1G1 |    | 1  |    |
| III      | ATP6V1H  |    |    | 2  |
|          | ATP7A    |    |    | 3  |
|          | ATP7B    |    | 1  | 1  |
|          | ATP8B1   |    |    |    |
| II       | ATP8B2   | 1  | 3  | 7  |
| II + III | ATP9A    | 9  | 11 | 18 |
| III      | ATP9B    |    |    | 1  |
| III      | ATPAF1   |    |    | 1  |
| III      | ATPAF2   |    |    |    |
| III      | ATPBD4   |    |    |    |

|          |          |    |    |    |
|----------|----------|----|----|----|
| III      | ATPIF1   |    |    |    |
|          | ATR      |    |    |    |
|          | ATRIP    | 1  |    | 1  |
| II + III | ATRN     | 2  | 4  | 4  |
| II       | ATRX     | 2  | 1  | 5  |
| II       | ATXN1    | 1  | 2  | 7  |
| II       | ATXN10   | 1  | 1  | 2  |
| II + III | ATXN1L   | 3  | 9  | 23 |
| III      | ATXN2    |    | 1  | 4  |
| II       | ATXN2L   | 2  | 6  | 10 |
| III      | ATXN3    |    |    | 1  |
|          | ATXN7    |    | 2  | 9  |
| II       | ATXN7L1  | 1  | 1  | 5  |
| III      | ATXN7L2  |    |    |    |
| II       | ATXN7L3  | 3  | 4  | 12 |
|          | ATXN7L3B |    | 4  | 9  |
| III      | AUH      |    |    | 3  |
| II       | AUP1     | 4  | 3  | 4  |
|          | AURKA    | 1  |    | 4  |
| III      | AURKAIP1 | 1  |    | 2  |
| III      | AURKB    |    |    | 1  |
| III      | AVEN     |    |    |    |
| II + III | AVL9     | 4  | 2  | 1  |
| II       | AVP11    | 1  | 1  | 5  |
| II + III | AXIN1    | 2  | 1  | 7  |
|          | AXIN2    |    |    |    |
| II       | AXL      | 2  | 4  | 1  |
| III      | AZI1     |    |    |    |
| II       | AZI2     | 1  | 2  | 4  |
| II       | AZIN1    | 1  | 3  | 8  |
| II       | B2M      | 3  | 3  | 6  |
|          | B3GALNT2 |    | 4  | 2  |
| II + III | B3GALT6  | 7  | 11 | 19 |
| II       | B3GAT3   | 1  | 2  | 2  |
|          | B3GNT1   |    | 3  | 3  |
| II + III | B3GNT2   | 3  | 6  | 7  |
| II + III | B3GNT9   | 2  | 1  | 10 |
| III      | B3GNTL1  |    |    |    |
|          | B4GALNT1 | 1  |    | 2  |
| II       | B4GALNT4 | 1  | 1  | 7  |
| II       | B4GALT1  | 12 | 12 | 16 |
| II       | B4GALT2  | 1  | 5  | 7  |
| II       | B4GALT3  | 2  | 3  | 5  |
|          | B4GALT4  |    |    | 1  |
| II + III | B4GALT5  | 3  | 7  | 11 |
| II + III | B4GALT7  | 3  | 2  | 5  |
| III      | B9D1     |    |    | 1  |
|          | B9D2     |    |    |    |
| III      | BABAM1   |    | 1  | 2  |
| II       | BACE1    | 1  | 3  | 13 |
| II + III | BACE2    | 4  | 11 | 17 |



|          |          |   |    |    |
|----------|----------|---|----|----|
| II + III | BACH1    | 1 | 4  | 7  |
| III      | BAD      |   |    |    |
| III      | BAG1     |   |    | 1  |
| III      | BAG2     |   |    |    |
|          | BAG3     |   | 3  | 7  |
|          | BAG4     |   | 3  | 7  |
| II + III | BAG5     | 1 | 3  | 7  |
| II       | BAG6     | 2 | 5  | 2  |
| II       | BAHCC1   | 2 | 3  | 18 |
| II + III | BAHD1    | 1 | 4  | 8  |
|          | BAI2     |   | 2  | 2  |
| III      | BAIAP2   |   |    | 1  |
| II       | BAIAP2L1 | 5 | 1  | 4  |
| II       | BAK1     | 1 | 2  | 4  |
| II + III | BAMBI    | 2 | 3  | 5  |
| II       | BANF1    | 1 | 2  | 4  |
| III      | BANP     | 1 | 1  |    |
| II       | BAP1     | 1 | 1  | 7  |
| II + III | BARD1    | 1 | 1  | 1  |
| II       | BASP1    | 6 | 12 | 10 |
|          | BATF3    |   |    |    |
| II       | BAX      | 2 | 3  | 4  |
| II       | BAZ1A    | 1 | 1  | 4  |
| II       | BAZ1B    | 1 | 5  | 11 |
| II       | BAZ2A    | 4 | 5  | 13 |
| III      | BAZ2B    |   |    | 1  |
| III      | BBIP1    |   |    | 1  |
| III      | BBS1     |   |    |    |
|          | BBS10    |   |    |    |
|          | BBS2     |   |    |    |
| III      | BBS4     |   |    | 1  |
| III      | BBS7     |   |    |    |
|          | BBS9     |   |    |    |
| II       | BBX      | 2 | 3  | 8  |
| III      | BCAM     |   |    | 2  |
| II       | BCAP29   | 1 | 2  | 2  |
| II       | BCAP31   | 1 | 5  | 4  |
| II + III | BCAR1    | 9 | 10 | 24 |
| II + III | BCAR3    | 2 | 1  | 3  |
| III      | BCAS2    |   |    |    |
| III      | BCAS3    |   |    | 2  |
| III      | BCAS4    |   |    |    |
| II       | BCAT1    | 1 | 6  | 4  |
| II       | BCAT2    | 1 | 3  | 2  |
| III      | BCCIP    | 1 |    | 2  |
| III      | BCKDHA   |   |    | 1  |
| III      | BCKDHB   |   |    |    |
| III      | BCKDK    |   |    | 8  |
|          | BCL10    |   | 2  | 4  |
| II       | BCL2L1   | 3 | 3  | 8  |
|          | BCL2L11  |   |    | 1  |

|          |         |    |    |    |
|----------|---------|----|----|----|
| II       | BCL2L12 | 1  | 1  | 2  |
| II + III | BCL2L13 | 1  | 4  | 13 |
| III      | BCL2L2  |    | 3  | 3  |
| III      | BCL3    |    | 1  | 1  |
| III      | BCL6    |    | 2  | 3  |
| II + III | BCL7A   | 2  | 5  | 12 |
| II       | BCL7B   | 2  | 3  | 4  |
| III      | BCL7C   |    |    | 1  |
| II + III | BCL9    | 1  | 2  | 14 |
| II       | BCL9L   | 17 | 29 | 51 |
| II       | BCLAF1  | 1  | 4  | 5  |
| II + III | BCOR    | 5  | 5  | 13 |
| II       | BCORL1  | 1  | 3  | 5  |
|          | BCR     | 2  |    | 4  |
| III      | BCS1L   |    | 1  | 3  |
|          | BDH1    |    |    | 2  |
| III      | BDH2    |    |    |    |
| III      | BDP1    |    | 2  | 4  |
| III      | BECN1   |    |    | 1  |
| III      | BET1    |    |    |    |
| II       | BET1L   | 5  | 6  | 15 |
| II + III | BFAR    | 1  | 4  | 8  |
| III      | BFSP1   |    |    |    |
| II + III | BHLHE40 | 6  | 4  | 15 |
|          | BHLHE41 |    | 1  | 5  |
|          | BICC1   |    | 1  |    |
| II + III | BICD1   | 3  | 3  | 9  |
| II       | BICD2   | 2  | 4  | 9  |
| III      | BID     |    |    | 1  |
| III      | BIN1    |    |    |    |
|          | BIN3    |    |    | 4  |
|          | BIRC2   |    |    | 2  |
| III      | BIRC5   |    | 3  | 3  |
| II + III | BIRC6   | 3  | 5  | 12 |
| II       | BLCAP   | 1  | 2  | 9  |
|          | BLM     |    | 2  | 2  |
| III      | BLMH    |    |    | 2  |
| II       | BLOC1S2 | 2  | 1  | 4  |
| II       | BLOC1S3 | 2  | 4  | 6  |
| III      | BLVRA   |    |    |    |
| III      | BLVRB   | 1  |    |    |
| III      | BLZF1   |    |    | 2  |
| III      | BMP1    |    |    | 2  |
|          | BMP2K   |    | 2  | 13 |
|          | BMP4    |    |    | 2  |
| II + III | BMP6    | 1  | 3  | 5  |
| II + III | BMPR2   | 1  | 3  | 7  |
| III      | BMS1    |    |    |    |
| III      | BNIP1   |    |    | 2  |
| III      | BNIP2   |    |    | 1  |
| III      | BNIP3   |    |    | 4  |

|          |        |   |    |    |
|----------|--------|---|----|----|
| III      | BNIP3L |   |    |    |
| III      | BOD1   | 1 | 1  |    |
| III      | BOD1L1 |   |    | 1  |
|          | BOK    |   | 1  | 5  |
|          | BOLA1  |   |    |    |
| III      | BOLA3  |   |    |    |
| III      | BOP1   |   |    |    |
|          | BORA   |   | 1  | 1  |
|          | BPGM   |   |    |    |
| III      | BPHL   |   |    |    |
| III      | BPNT1  |   | 1  |    |
| II       | BPTF   | 2 | 5  | 15 |
|          | BRAF   |   | 1  | 1  |
|          | BRAP   |   |    | 1  |
| III      | BRAT1  |   | 2  | 6  |
|          | BRCA1  |   |    | 1  |
| III      | BRCA2  |   |    | 2  |
|          | BRCC3  |   | 2  | 5  |
| II + III | BRD1   | 1 | 1  | 3  |
| II       | BRD2   | 8 | 16 | 34 |
| II       | BRD3   | 1 | 4  | 1  |
| II       | BRD4   | 4 | 10 | 15 |
| III      | BRD7   | 1 |    |    |
| II       | BRD8   | 1 | 1  | 2  |
| III      | BRD9   | 2 |    | 3  |
| III      | BRE    |   |    |    |
|          | BRF1   | 1 |    | 3  |
| II       | BRF2   | 2 | 1  | 3  |
| III      | BRI3   | 1 |    | 2  |
| II + III | BRI3BP | 3 | 4  | 9  |
|          | BRIP1  |   |    | 1  |
| III      | BRIX1  |   | 1  | 3  |
| III      | BRK1   |   | 1  | 1  |
| III      | BRMS1  | 2 |    | 1  |
| III      | BRMS1L |   |    |    |
| III      | BROX   |   |    | 1  |
| III      | BRP44  |   |    |    |
| III      | BRP44L |   |    |    |
| II       | BRPF1  | 6 | 3  | 8  |
|          | BRPF3  |   | 3  | 9  |
| III      | BRSK2  |   | 1  | 2  |
|          | BRWD1  |   |    |    |
|          | BRWD3  |   |    |    |
| II       | BSDC1  | 1 | 2  | 7  |
| II       | BSG    | 9 | 4  | 2  |
| II       | BST2   | 5 | 4  | 4  |
|          | BTAF1  |   |    | 2  |
| III      | BTBD1  |   | 1  | 3  |
| III      | BTBD10 |   |    |    |
| III      | BTBD2  | 1 |    | 5  |
|          | BTBD3  | 2 |    | 11 |

|          |           |   |   |    |
|----------|-----------|---|---|----|
|          | BTBD6     |   | 2 | 10 |
| II + III | BTBD7     | 3 | 8 | 10 |
|          | BTBD9     |   | 1 | 6  |
|          | BTD       | 2 |   | 1  |
| III      | BTF3      | 2 |   | 2  |
| III      | BTF3L4    | 1 |   | 1  |
| II + III | BTG2      | 2 | 1 | 3  |
| III      | BTG3      |   |   |    |
| II + III | BTN2A1    | 1 | 7 | 6  |
| II + III | BTN3A1    | 1 | 6 | 7  |
| II + III | BTN3A2    | 3 | 2 | 10 |
| II + III | BTN3A3    | 1 | 2 | 3  |
|          | BTRC      |   | 4 | 5  |
|          | BUB1      |   |   |    |
| III      | BUB3      |   | 2 | 1  |
| II       | BUD13     | 1 | 2 | 5  |
| III      | BUD31     |   |   | 1  |
| II + III | BYSL      | 1 | 2 | 8  |
|          | BZW1      |   | 1 | 5  |
| III      | BZW2      |   | 1 |    |
|          | C10orf114 |   | 1 | 1  |
| III      | C10orf118 |   |   | 2  |
|          | C10orf12  |   |   | 1  |
| III      | C10orf125 |   |   |    |
|          | C10orf137 |   |   |    |
|          | C10orf2   |   | 2 | 5  |
| III      | C10orf32  |   |   |    |
| III      | C10orf35  |   |   |    |
| II + III | C10orf47  | 2 | 5 | 3  |
| III      | C10orf57  |   |   |    |
| III      | C10orf76  |   |   |    |
|          | C10orf88  |   | 1 | 1  |
| III      | C11orf1   |   |   |    |
| III      | C11orf10  |   |   |    |
| II       | C11orf2   | 1 | 1 | 1  |
|          | C11orf24  |   | 2 | 9  |
|          | C11orf30  |   | 1 | 4  |
| III      | C11orf31  |   |   |    |
|          | C11orf46  |   | 1 | 2  |
| III      | C11orf48  |   | 1 |    |
| III      | C11orf49  | 1 |   | 4  |
| III      | C11orf54  |   |   |    |
|          | C11orf57  |   | 2 | 4  |
| III      | C11orf58  | 1 |   |    |
|          | C11orf63  |   | 1 | 3  |
| III      | C11orf67  |   |   |    |
|          | C11orf68  |   |   | 2  |
|          | C11orf71  |   |   | 1  |
| III      | C11orf73  |   |   |    |
| III      | C11orf74  |   |   |    |
| III      | C11orf75  |   | 2 | 1  |

|          |           |    |    |    |
|----------|-----------|----|----|----|
| II + III | C11orf82  | 1  | 3  | 6  |
|          | C11orf83  |    |    |    |
| III      | C11orf84  |    | 1  | 3  |
| III      | C12orf10  |    | 1  |    |
|          | C12orf23  |    | 2  | 2  |
|          | C12orf26  |    |    |    |
| III      | C12orf29  |    |    |    |
|          | C12orf32  |    | 2  | 3  |
|          | C12orf35  |    | 2  | 7  |
|          | C12orf4   |    | 1  | 2  |
|          | C12orf43  |    | 1  | 2  |
| II       | C12orf44  | 1  | 5  | 5  |
| III      | C12orf45  |    |    |    |
| II + III | C12orf49  | 1  | 4  | 7  |
|          | C12orf5   |    | 1  | 4  |
|          | C12orf51  | 1  |    | 1  |
| III      | C12orf52  |    |    | 4  |
| III      | C12orf57  |    |    |    |
| II + III | C12orf65  | 1  | 2  | 2  |
|          | C12orf66  |    | 1  | 2  |
| III      | C12orf73  |    |    |    |
| III      | C12orf75  |    |    |    |
|          | C12orf76  |    |    |    |
| II       | C14orf1   | 2  | 2  | 1  |
|          | C14orf101 |    |    | 1  |
|          | C14orf102 |    | 1  | 3  |
|          | C14orf109 |    |    | 1  |
|          | C14orf118 | 1  |    | 1  |
| II + III | C14orf119 | 2  | 1  | 7  |
| III      | C14orf126 |    | 1  | 1  |
|          | C14orf129 |    | 1  |    |
| III      | C14orf133 | 1  |    |    |
| II + III | C14orf135 | 1  | 5  | 7  |
|          | C14orf142 |    |    | 1  |
|          | C14orf149 |    | 1  | 1  |
| III      | C14orf166 |    | 2  | 2  |
| II + III | C14orf169 | 2  | 2  | 3  |
| III      | C14orf2   |    | 1  | 1  |
| II + III | C14orf43  | 2  | 6  | 8  |
|          | C14orf79  |    |    | 1  |
| III      | C14orf80  | 1  |    | 1  |
|          | C14orf93  |    |    |    |
| II       | C15orf23  | 1  | 3  | 4  |
|          | C15orf29  |    |    | 1  |
| II + III | C15orf39  | 15 | 20 | 38 |
| III      | C15orf40  |    |    | 1  |
| II       | C15orf41  | 1  | 1  | 1  |
| II + III | C15orf42  | 3  | 6  | 12 |
| II + III | C15orf44  | 1  | 4  | 8  |
| III      | C15orf52  |    |    |    |
| II       | C15orf57  | 1  | 1  | 2  |

|          |           |   |    |    |
|----------|-----------|---|----|----|
| III      | C15orf61  |   |    |    |
| III      | C16orf13  |   | 1  | 2  |
|          | C16orf45  |   |    | 3  |
| III      | C16orf5   |   | 2  | 8  |
|          | C16orf55  |   |    |    |
| II       | C16orf57  | 1 | 5  | 1  |
| II       | C16orf58  | 6 | 6  | 9  |
| III      | C16orf59  |   |    | 2  |
| III      | C16orf62  |   |    |    |
| III      | C16orf7   |   | 1  | 3  |
|          | C16orf70  |   | 3  | 9  |
| II + III | C16orf72  | 1 | 11 | 19 |
|          | C16orf74  | 1 |    | 2  |
| III      | C16orf80  |   | 1  |    |
|          | C16orf87  |   |    | 1  |
| II + III | C16orf88  | 1 | 3  | 7  |
| II + III | C16orf91  | 2 | 1  | 3  |
| III      | C16orf95  |   |    |    |
|          | C17orf101 |   |    | 2  |
| III      | C17orf108 |   |    |    |
| III      | C17orf39  |   |    | 1  |
|          | C17orf48  |   | 1  | 2  |
| II + III | C17orf51  | 4 | 10 | 26 |
|          | C17orf53  |   | 1  | 4  |
| III      | C17orf56  |   | 1  |    |
|          | C17orf58  |   |    |    |
| II + III | C17orf59  | 1 | 3  | 2  |
| II + III | C17orf62  | 7 | 9  | 8  |
|          | C17orf65  |   |    | 1  |
| II       | C17orf70  | 3 | 2  | 3  |
| III      | C17orf75  |   |    |    |
| III      | C17orf79  |   |    |    |
|          | C17orf80  |   | 3  | 4  |
| III      | C17orf81  |   | 1  | 2  |
|          | C17orf85  |   |    | 3  |
| III      | C17orf89  |   |    |    |
| II       | C17orf90  | 1 | 2  | 3  |
| II + III | C17orf96  | 1 | 2  | 14 |
| II       | C17orf97  | 2 | 1  | 2  |
| III      | C18orf21  |   |    |    |
| II + III | C18orf25  | 3 | 3  | 4  |
| II + III | C18orf54  | 1 | 1  | 3  |
| III      | C18orf56  |   |    |    |
| III      | C18orf8   |   |    | 1  |
| II       | C19orf10  | 3 | 4  | 1  |
|          | C19orf21  | 1 | 1  |    |
| II       | C19orf24  | 5 | 3  | 4  |
| III      | C19orf25  |   |    |    |
|          | C19orf26  |   |    | 1  |
|          | C19orf40  |   |    |    |
| II       | C19orf42  | 4 | 3  | 1  |

|          |           |   |    |    |
|----------|-----------|---|----|----|
| II       | C19orf43  | 1 | 4  | 5  |
| II + III | C19orf44  | 1 | 6  | 14 |
| II       | C19orf47  | 1 | 3  | 1  |
| II       | C19orf48  | 5 | 6  | 14 |
|          | C19orf52  | 2 |    | 3  |
| II       | C19orf53  | 1 | 1  | 2  |
| III      | C19orf54  |   | 2  | 9  |
| III      | C19orf55  |   |    | 3  |
|          | C19orf57  |   |    |    |
| II       | C19orf6   | 9 | 15 | 15 |
| III      | C19orf60  |   |    |    |
| III      | C19orf70  | 1 |    |    |
| III      | C19orf71  |   |    |    |
| III      | C1D       |   |    |    |
|          | C1GALT1   | 1 |    | 1  |
|          | C1GALT1C1 |   |    | 3  |
| II       | C1QBP     | 3 | 1  | 8  |
| II       | C1QL1     | 1 | 1  | 1  |
| II       | C1QTNF6   | 1 | 4  | 9  |
| II       | C1R       | 1 | 1  | 2  |
|          | C1RL      |   | 3  | 5  |
|          | C1S       |   |    | 1  |
|          | C1orf109  | 1 | 1  |    |
| III      | C1orf112  |   |    | 1  |
|          | C1orf115  |   | 1  | 1  |
| III      | C1orf122  |   | 1  | 1  |
| III      | C1orf123  |   |    | 1  |
| III      | C1orf131  |   |    |    |
| III      | C1orf133  |   |    |    |
|          | C1orf135  |   |    |    |
| II       | C1orf144  | 2 | 5  | 7  |
| II       | C1orf159  | 1 | 4  | 10 |
|          | C1orf174  |   |    |    |
| III      | C1orf198  |   | 1  | 5  |
| II + III | C1orf212  | 2 | 2  | 3  |
|          | C1orf216  |   | 3  | 10 |
| II       | C1orf233  | 5 | 1  | 3  |
| II       | C1orf27   | 1 | 2  | 2  |
| III      | C1orf31   |   |    |    |
| III      | C1orf35   |   |    | 3  |
| III      | C1orf43   |   | 6  | 3  |
|          | C1orf50   |   | 1  |    |
|          | C1orf52   |   | 1  | 1  |
| III      | C1orf53   |   |    |    |
|          | C1orf56   | 1 |    | 2  |
| III      | C1orf63   |   |    |    |
| II + III | C1orf74   | 1 | 3  | 8  |
| II       | C1orf85   | 1 | 2  | 3  |
| II       | C1orf86   | 1 | 1  | 5  |
|          | C1orf9    |   | 2  | 5  |
| II + III | C20orf11  | 1 | 5  | 9  |

|          |           |   |   |    |
|----------|-----------|---|---|----|
| II       | C20orf111 | 1 | 2 | 4  |
|          | C20orf112 |   |   |    |
| II + III | C20orf20  | 2 | 2 | 4  |
| III      | C20orf27  |   | 3 | 1  |
| III      | C20orf3   |   |   | 3  |
| II + III | C20orf4   | 6 | 9 | 17 |
| III      | C20orf43  |   |   | 3  |
|          | C20orf72  |   |   |    |
|          | C20orf94  |   | 1 |    |
| III      | C20orf96  |   |   |    |
|          | C21orf119 |   |   |    |
| III      | C21orf2   | 1 |   |    |
| III      | C21orf33  |   | 2 | 1  |
| II + III | C21orf58  | 1 | 2 | 8  |
| III      | C21orf59  |   |   |    |
|          | C21orf91  |   | 2 |    |
| II       | C22orf13  | 1 | 2 | 11 |
| III      | C22orf25  |   |   |    |
| II       | C22orf28  | 2 | 2 | 2  |
| II + III | C22orf29  | 3 | 5 | 9  |
| III      | C22orf32  |   |   | 1  |
|          | C22orf39  |   |   | 2  |
|          | C22orf40  |   | 1 | 5  |
| III      | C2CD2L    |   |   | 2  |
| II + III | C2CD3     | 2 | 2 | 3  |
| II       | C2orf18   | 3 | 8 | 16 |
| III      | C2orf28   | 1 | 1 |    |
| III      | C2orf29   |   | 1 | 2  |
|          | C2orf42   |   |   | 1  |
|          | C2orf43   |   |   | 1  |
| II + III | C2orf44   | 3 | 1 | 6  |
| III      | C2orf47   |   |   |    |
|          | C2orf49   |   |   | 1  |
|          | C2orf56   |   | 1 | 2  |
| II       | C2orf68   | 1 | 1 | 2  |
|          | C2orf69   |   |   | 1  |
| III      | C2orf70   |   |   |    |
| III      | C2orf74   |   | 1 | 1  |
| III      | C2orf76   |   |   |    |
| II + III | C2orf89   | 6 | 7 | 11 |
| III      | C3        | 1 |   |    |
| II + III | C3orf17   | 1 | 2 | 2  |
| III      | C3orf18   |   |   | 1  |
| III      | C3orf19   |   | 1 | 1  |
| III      | C3orf23   |   |   |    |
| III      | C3orf26   |   | 1 | 2  |
| III      | C3orf37   |   |   | 2  |
|          | C3orf38   |   | 2 | 5  |
| III      | C3orf52   |   |   |    |
| II + III | C3orf58   | 2 | 3 | 8  |
| III      | C3orf72   |   |   |    |



|          |          |   |   |    |
|----------|----------|---|---|----|
| III      | C3orf75  |   |   |    |
| III      | C3orf78  |   |   |    |
| III      | C4BPA    |   |   |    |
| III      | C4BPB    |   |   |    |
|          | C4orf21  | 1 |   | 1  |
| III      | C4orf27  |   |   |    |
|          | C4orf29  |   |   |    |
| III      | C4orf3   |   |   |    |
|          | C4orf32  |   |   | 2  |
| III      | C4orf33  |   |   |    |
| III      | C4orf34  |   |   |    |
| III      | C4orf48  |   |   |    |
|          | C4orf52  |   | 1 |    |
|          | C5       |   |   |    |
| II + III | C5orf15  | 2 | 3 | 4  |
| II       | C5orf22  | 1 | 2 | 12 |
| II + III | C5orf24  | 1 | 2 | 9  |
| II       | C5orf25  | 1 | 4 | 8  |
|          | C5orf28  |   | 2 | 4  |
| II + III | C5orf30  | 1 | 1 | 3  |
| II       | C5orf34  | 1 | 2 | 2  |
|          | C5orf42  |   |   | 3  |
|          | C5orf43  |   |   | 2  |
|          | C5orf44  |   |   |    |
|          | C5orf45  |   |   |    |
| III      | C5orf51  |   | 2 | 7  |
|          | C5orf54  |   |   | 3  |
| II       | C5orf55  | 1 | 1 | 2  |
|          | C5orf62  |   |   | 1  |
| III      | C6orf1   |   | 1 | 1  |
| II       | C6orf106 | 1 | 6 | 16 |
| III      | C6orf108 |   |   |    |
| II + III | C6orf120 | 1 | 1 | 4  |
| III      | C6orf130 |   |   | 1  |
| II       | C6orf136 | 1 | 1 | 2  |
| III      | C6orf162 |   | 1 | 1  |
|          | C6orf203 |   |   | 5  |
|          | C6orf211 |   |   |    |
| III      | C6orf223 |   |   | 1  |
| III      | C6orf225 |   |   |    |
| III      | C6orf226 |   |   |    |
| II + III | C6orf228 | 1 | 2 | 7  |
| II + III | C6orf47  | 3 | 3 | 5  |
| II       | C6orf48  | 1 | 1 | 1  |
| III      | C6orf57  |   |   |    |
|          | C6orf62  |   | 3 | 10 |
| III      | C6orf70  |   |   |    |
|          | C6orf72  |   |   |    |
| II + III | C6orf89  | 2 | 5 | 6  |
| III      | C6orf99  |   |   |    |
| III      | C7orf10  |   |   |    |

|          |          |    |   |    |
|----------|----------|----|---|----|
|          | C7orf13  |    |   |    |
| III      | C7orf23  |    |   |    |
|          | C7orf25  |    |   |    |
| II       | C7orf26  | 2  | 2 | 6  |
| III      | C7orf43  |    |   | 1  |
| II + III | C7orf49  | 2  | 5 | 4  |
| II       | C7orf50  | 2  | 2 | 8  |
| III      | C7orf59  |    |   | 1  |
| III      | C7orf73  |    |   |    |
| II       | C8orf33  | 1  | 2 | 4  |
|          | C8orf37  |    |   |    |
|          | C8orf4   |    | 2 | 3  |
| III      | C8orf40  |    |   |    |
|          | C8orf58  |    | 2 | 6  |
| III      | C8orf59  |    |   |    |
| III      | C8orf82  |    |   | 1  |
|          | C9orf100 |    |   | 1  |
| II       | C9orf114 | 1  | 2 | 8  |
| III      | C9orf116 |    |   |    |
| II       | C9orf123 | 2  | 1 | 1  |
| II       | C9orf142 | 1  | 1 | 1  |
|          | C9orf156 |    | 1 | 2  |
| III      | C9orf16  |    | 1 | 2  |
|          | C9orf169 |    |   |    |
|          | C9orf3   |    |   | 3  |
| II       | C9orf37  | 1  | 2 | 3  |
| III      | C9orf40  |    |   | 3  |
|          | C9orf41  |    |   |    |
|          | C9orf64  |    |   |    |
| II + III | C9orf69  | 10 | 9 | 16 |
|          | C9orf72  |    |   |    |
| III      | C9orf78  |    | 2 | 1  |
| III      | C9orf85  |    |   | 1  |
| II       | C9orf86  | 3  | 2 | 6  |
| III      | C9orf89  |    |   |    |
| III      | C9orf9   |    |   |    |
|          | C9orf91  |    | 3 | 11 |
| III      | CA11     |    |   |    |
| II       | CA5B     | 1  | 2 | 5  |
| III      | CA5BP1   | 2  |   | 9  |
|          | CAB39    | 1  |   |    |
| III      | CAB39L   |    |   |    |
| III      | CABIN1   |    |   | 1  |
|          | CABLES1  |    |   |    |
|          | CABLES2  |    |   | 3  |
| III      | CABP4    |    |   | 2  |
|          | CACFD1   |    |   | 3  |
|          | CACHD1   |    | 2 | 3  |
| II + III | CACNA2D1 | 1  | 2 | 2  |
|          | CACNA2D3 |    | 3 | 1  |
|          | CACNB3   |    |   | 3  |

|          |          |   |    |    |
|----------|----------|---|----|----|
| III      | CACYBP   |   | 1  |    |
|          | CAD      |   | 2  |    |
| II       | CADM1    | 1 | 4  | 1  |
| III      | CADM4    |   |    | 1  |
| III      | CALCOCO1 |   |    |    |
| III      | CALCOCO2 |   |    |    |
| II       | CALD1    | 3 | 5  | 5  |
| II       | CALM1    | 2 | 1  | 2  |
| III      | CALM2    |   | 1  | 3  |
| III      | CALM3    |   |    | 4  |
|          | CALML4   |   | 1  | 3  |
| II       | CALR     | 8 | 13 | 11 |
| II       | CALU     | 7 | 8  | 12 |
| III      | CAMK1    |   |    | 1  |
|          | CAMK1D   |   | 2  | 2  |
| II + III | CAMK2G   | 1 | 2  | 6  |
| III      | CAMK2N1  |   |    |    |
|          | CAMK4    |   |    |    |
| II + III | CAMKK1   | 1 | 1  | 6  |
|          | CAMKK2   |   |    | 1  |
| III      | CAMKMT   |   |    | 1  |
|          | CAMLG    |   |    |    |
| II + III | CAMSAP1  | 1 | 1  | 5  |
| II + III | CAMSAP2  | 1 | 7  | 15 |
| III      | CAMSAP3  |   |    |    |
| III      | CAMTA1   |   | 1  | 2  |
| III      | CAMTA2   |   | 3  | 3  |
|          | CAND1    |   | 3  | 4  |
| II + III | CANT1    | 9 | 16 | 16 |
| II       | CANX     | 7 | 16 | 11 |
| III      | CAP1     |   | 2  | 4  |
| III      | CAP2     |   | 1  | 3  |
| III      | CAPG     |   |    |    |
| III      | CAPN1    |   |    | 2  |
| III      | CAPN10   |   |    |    |
| II       | CAPN2    | 1 | 3  | 4  |
|          | CAPN7    |   |    | 6  |
| II       | CAPNS1   | 2 | 2  | 2  |
| II       | CAPRIN1  | 1 | 4  | 5  |
|          | CAPRIN2  |   |    | 1  |
| III      | CAPZA1   |   | 4  | 6  |
| III      | CAPZA2   |   |    |    |
| II       | CAPZB    | 3 | 1  | 4  |
| III      | CARD10   |   |    | 1  |
|          | CARD8    |   | 2  | 2  |
| III      | CARHSP1  |   | 1  | 1  |
|          | CARKD    |   |    | 7  |
| III      | CARM1    |   | 1  | 1  |
| III      | CARS     |   | 3  | 3  |
| III      | CARS2    |   |    | 1  |
| II       | CASC3    | 1 | 2  | 5  |

|          |          |   |    |    |
|----------|----------|---|----|----|
| II       | CASC4    | 1 | 1  | 2  |
| II       | CASC5    | 1 | 5  | 11 |
|          | CASK     |   | 1  | 2  |
|          | CASKIN2  |   | 2  | 7  |
| II       | CASP2    | 1 | 3  | 8  |
| III      | CASP3    |   |    | 1  |
| III      | CASP4    |   |    |    |
| III      | CASP6    |   |    |    |
|          | CASP7    |   |    | 1  |
|          | CASP8    | 1 |    | 4  |
|          | CASP8AP2 |   | 2  | 6  |
|          | CASP9    |   |    |    |
| II       | CAST     | 2 | 2  | 1  |
| III      | CAT      |   | 2  | 1  |
| II       | CAV1     | 2 | 1  | 7  |
| III      | CAV2     |   |    | 1  |
| II + III | CBFA2T2  | 5 | 3  | 11 |
| III      | CBFB     |   |    | 2  |
|          | CBL      |   | 3  | 8  |
|          | CBLB     |   |    |    |
|          | CBLL1    |   | 4  | 9  |
| III      | CBR1     |   |    |    |
| III      | CBR3     |   |    |    |
| III      | CBR4     |   |    |    |
| II       | CBS      | 1 | 3  | 5  |
| III      | CBWD1    |   |    |    |
| III      | CBX1     |   | 1  | 6  |
| II + III | CBX2     | 5 | 10 | 24 |
| III      | CBX3     |   | 1  |    |
| II + III | CBX4     | 8 | 7  | 14 |
| II       | CBX5     | 3 | 7  | 12 |
| II       | CBX6     | 1 | 8  | 14 |
| III      | CBX7     |   |    | 1  |
|          | CBX8     |   | 1  | 3  |
| III      | CBY1     |   |    |    |
| II       | CC2D1A   | 1 | 1  | 2  |
| III      | CC2D1B   |   |    | 4  |
| III      | CC2D2A   |   |    |    |
| II       | CCAR1    | 1 | 1  | 2  |
| III      | CCBL1    | 1 |    |    |
| III      | CCBL2    |   |    |    |
| III      | CCDC101  |   |    |    |
| III      | CCDC102A |   |    |    |
| III      | CCDC104  |   |    |    |
| III      | CCDC106  |   |    |    |
| III      | CCDC109B |   |    |    |
|          | CCDC111  |   |    | 1  |
| III      | CCDC112  |   |    |    |
| III      | CCDC113  |   |    |    |
| III      | CCDC115  |   |    |    |
|          | CCDC117  |   |    | 1  |

|          |          |   |   |    |
|----------|----------|---|---|----|
| III      | CCDC12   |   |   |    |
| III      | CCDC120  | 1 |   |    |
| III      | CCDC124  |   | 1 | 2  |
| III      | CCDC125  |   |   | 2  |
|          | CCDC126  |   |   | 2  |
|          | CCDC127  |   | 4 | 5  |
| II       | CCDC130  | 1 | 1 | 4  |
|          | CCDC132  |   |   |    |
| II       | CCDC134  | 1 | 3 | 5  |
| III      | CCDC137  | 1 |   | 6  |
| III      | CCDC138  |   |   | 3  |
|          | CCDC14   |   | 2 | 3  |
| III      | CCDC159  |   |   |    |
| III      | CCDC163P |   |   |    |
| III      | CCDC167  |   |   |    |
|          | CCDC169  |   |   |    |
| III      | CCDC18   |   |   |    |
| II       | CCDC22   | 1 | 1 | 3  |
|          | CCDC23   |   |   |    |
| III      | CCDC24   |   |   |    |
| III      | CCDC25   |   |   | 1  |
| III      | CCDC28A  |   |   |    |
| II       | CCDC28B  | 1 | 1 | 1  |
| III      | CCDC34   | 1 |   | 1  |
| II       | CCDC41   | 1 | 1 | 4  |
| III      | CCDC43   |   |   | 1  |
| II       | CCDC47   | 2 | 2 | 3  |
| III      | CCDC50   | 1 |   | 1  |
|          | CCDC51   |   |   |    |
| III      | CCDC53   |   |   |    |
|          | CCDC56   |   |   |    |
| III      | CCDC57   | 2 |   | 5  |
| III      | CCDC58   |   |   |    |
| III      | CCDC59   |   |   |    |
| II + III | CCDC6    | 1 | 2 | 11 |
| III      | CCDC64   |   | 1 |    |
| III      | CCDC66   |   | 1 | 4  |
| III      | CCDC69   |   |   | 1  |
|          | CCDC71   | 1 |   | 3  |
| III      | CCDC75   |   |   |    |
| III      | CCDC77   |   |   |    |
|          | CCDC80   |   |   |    |
| III      | CCDC82   | 1 |   | 2  |
| III      | CCDC84   |   | 1 | 1  |
|          | CCDC85B  |   | 2 | 3  |
| II       | CCDC85C  | 3 | 9 | 18 |
| II       | CCDC86   | 2 | 3 | 5  |
| III      | CCDC88A  |   | 2 | 1  |
| III      | CCDC9    |   |   |    |
| III      | CCDC90A  |   | 3 | 5  |
| III      | CCDC90B  |   |   | 1  |

|          |          |   |    |    |
|----------|----------|---|----|----|
| III      | CCDC91   |   | 1  | 1  |
| II       | CCDC92   | 1 | 1  | 2  |
|          | CCDC93   |   |    | 3  |
| II       | CCDC94   | 1 | 3  | 5  |
| III      | CCDC97   |   | 3  | 7  |
| III      | CCDC99   |   |    | 1  |
| III      | CCHCR1   |   |    | 1  |
| III      | CCL2     |   |    |    |
|          | CCM2     |   |    | 2  |
| III      | CCNA2    |   | 1  |    |
| II       | CCNB1    | 2 | 2  | 6  |
| III      | CCNB1IP1 |   | 2  | 1  |
| III      | CCNB2    |   |    | 1  |
| III      | CCNC     |   |    |    |
| II       | CCND1    | 2 | 5  | 5  |
| II       | CCND3    | 1 | 2  | 2  |
| III      | CCNDBP1  |   |    |    |
| III      | CCNE1    |   |    |    |
| III      | CCNE2    |   |    |    |
| II       | CCNF     | 3 | 4  | 13 |
| II       | CCNG1    | 1 | 2  | 3  |
| III      | CCNG2    |   |    |    |
| III      | CCNH     |   |    | 1  |
| II       | CCNI     | 1 | 5  | 6  |
|          | CCNJL    |   | 2  | 5  |
| II       | CCNK     | 1 | 1  | 2  |
| II       | CCNL1    | 4 | 3  | 4  |
|          | CCNL2    |   | 1  |    |
|          | CCNO     | 2 |    | 6  |
| II + III | CCNT1    | 6 | 12 | 21 |
| II + III | CCNT2    | 1 | 2  | 5  |
| III      | CCNY     |   |    | 1  |
|          | CCP110   |   |    | 4  |
| II + III | CCRN4L   | 2 | 2  | 10 |
| III      | CCS      |   |    |    |
| III      | CCT2     |   | 3  | 2  |
| III      | CCT3     |   | 1  | 5  |
| II       | CCT4     | 3 | 2  | 5  |
| II       | CCT5     | 5 | 5  | 5  |
| II       | CCT6A    | 3 | 2  | 2  |
| III      | CCT6P1   | 1 |    |    |
| III      | CCT6P3   |   | 2  |    |
| II       | CCT7     | 1 | 2  | 1  |
| III      | CCT8     |   |    |    |
| III      | CCZ1     |   | 1  | 1  |
| III      | CCZ1B    |   |    |    |
| II       | CD151    | 3 | 1  | 2  |
| II       | CD164    | 2 | 5  | 4  |
|          | CD24     |   |    | 2  |
| II       | CD276    | 2 | 8  | 14 |
| III      | CD2AP    |   | 1  |    |

|          |          |   |    |    |
|----------|----------|---|----|----|
| II       | CD2BP2   | 3 | 3  | 11 |
| II       | CD320    | 2 | 2  | 3  |
| II       | CD44     | 7 | 11 | 17 |
| III      | CD46     |   | 2  | 2  |
| II       | CD47     | 1 | 1  | 3  |
| II       | CD55     | 5 | 11 | 5  |
| III      | CD58     |   | 2  | 5  |
| II       | CD59     | 5 | 2  | 6  |
| II       | CD63     | 1 | 3  | 2  |
| III      | CD81     | 3 | 1  |    |
| II       | CD82     | 1 | 1  | 3  |
| II + III | CD83     | 9 | 8  | 14 |
| II       | CD9      | 1 | 3  | 3  |
| II       | CD97     | 8 | 14 | 20 |
| III      | CD99     |   | 1  |    |
| II + III | CD99L2   | 1 | 6  | 5  |
| III      | CDA      |   | 1  |    |
| III      | CDADC1   |   |    | 1  |
|          | CDAN1    |   |    |    |
| III      | CDC123   |   | 2  | 6  |
|          | CDC16    |   |    |    |
| II       | CDC20    | 3 | 3  | 5  |
|          | CDC23    |   |    | 2  |
| II       | CDC25A   | 2 | 5  | 10 |
| II       | CDC25B   | 3 | 1  | 4  |
| III      | CDC25C   |   |    | 1  |
| III      | CDC26    |   |    |    |
| II       | CDC27    | 1 | 4  | 11 |
| II       | CDC34    | 3 | 4  | 8  |
| II       | CDC37    | 1 | 4  | 3  |
| III      | CDC37L1  |   |    |    |
| III      | CDC40    |   |    |    |
| III      | CDC42    |   |    | 1  |
| II       | CDC42BPA | 1 | 1  | 6  |
| II       | CDC42BPB | 1 | 1  | 5  |
| II       | CDC42EP1 | 2 | 3  | 13 |
| II + III | CDC42EP2 | 1 | 2  | 8  |
|          | CDC42EP3 |   |    | 5  |
| II + III | CDC42EP4 | 3 | 7  | 13 |
| II       | CDC42SE1 | 2 | 10 | 8  |
|          | CDC42SE2 |   |    |    |
| III      | CDC45    |   |    | 1  |
| III      | CDC5L    |   |    | 1  |
| III      | CDC6     |   | 2  | 5  |
|          | CDC7     |   |    | 2  |
| III      | CDC73    |   |    |    |
|          | CDCA2    |   | 1  | 3  |
| III      | CDCA3    | 1 |    | 2  |
| II + III | CDCA4    | 1 | 3  | 4  |
| II       | CDCA5    | 3 | 6  | 11 |
| III      | CDCA7    |   | 1  | 1  |

|          |            |    |    |    |
|----------|------------|----|----|----|
| III      | CDCA7L     |    |    |    |
| III      | CDCA8      |    | 4  | 7  |
|          | CDH2       |    | 1  | 1  |
| III      | CDH24      |    |    | 1  |
| III      | CDIPT      |    | 3  | 6  |
| III      | CDK1       | 1  | 1  |    |
| II       | CDK10      | 1  | 1  | 3  |
| III      | CDK11A     |    |    |    |
| II + III | CDK12      | 3  | 9  | 23 |
| II + III | CDK13      | 2  | 7  | 17 |
| III      | CDK16      |    | 3  | 8  |
|          | CDK17      |    | 1  | 4  |
| III      | CDK18      |    |    |    |
|          | CDK19      |    | 1  | 2  |
| II       | CDK2       | 1  | 4  | 10 |
| III      | CDK20      |    |    |    |
| III      | CDK2AP1    |    |    |    |
| III      | CDK2AP2    |    |    |    |
| III      | CDK4       |    |    | 1  |
| III      | CDK5       |    |    |    |
| III      | CDK5RAP1   |    |    |    |
|          | CDK5RAP2   | 1  |    | 3  |
| III      | CDK5RAP3   |    |    | 1  |
| II + III | CDK6       | 2  | 5  | 11 |
| III      | CDK7       |    | 1  | 1  |
|          | CDK8       |    |    |    |
| II       | CDK9       | 2  | 2  | 5  |
| III      | CDKAL1     |    |    | 2  |
|          | CDKL1      |    | 1  | 1  |
| II       | CDKN1A     | 1  | 2  | 2  |
| II       | CDKN1B     | 1  | 4  | 7  |
| III      | CDKN1C     |    |    |    |
| II       | CDKN2A     | 1  | 1  | 4  |
|          | CDKN2AIP   |    | 1  | 3  |
| III      | CDKN2AIPNL |    |    |    |
| II + III | CDKN2B     | 2  | 3  | 5  |
| II + III | CDKN2C     | 4  | 3  | 7  |
| III      | CDKN2D     |    |    | 2  |
| III      | CDKN3      |    |    |    |
|          | CDON       |    | 1  |    |
|          | CDR2       |    | 2  | 5  |
| II       | CDR2L      | 2  | 1  | 9  |
|          | CDS2       |    |    | 1  |
| II       | CDT1       | 3  | 1  | 3  |
| II + III | CDV3       | 4  | 6  | 20 |
|          | CDYL       |    | 2  | 2  |
| II + III | CDYL2      | 3  | 4  | 8  |
| II + III | CEBPA      | 1  | 4  | 6  |
| II + III | CEBPB      | 10 | 12 | 17 |
|          | CEBPD      | 1  |    |    |
| II + III | CEBPG      | 2  | 1  | 3  |



|          |          |    |    |    |
|----------|----------|----|----|----|
| II + III | CEBPZ    | 1  | 1  | 4  |
| III      | CECR5    | 1  |    | 3  |
|          | CECR7    |    | 1  | 2  |
| II       | CELF1    | 1  | 2  | 8  |
| II + III | CELSR1   | 16 | 16 | 27 |
| II + III | CELSR2   | 11 | 13 | 21 |
| II + III | CELSR3   | 3  | 10 | 24 |
|          | CENPA    | 1  |    | 1  |
| II + III | CENPB    | 6  | 9  | 15 |
|          | CENPBD1  | 2  |    | 1  |
| III      | CENPC1   |    |    | 1  |
| III      | CENPE    |    |    | 1  |
| II       | CENPF    | 7  | 6  | 9  |
| III      | CENPH    |    |    |    |
|          | CENPI    |    | 2  | 2  |
| II       | CENPJ    | 1  | 1  | 2  |
| III      | CENPK    |    |    | 1  |
|          | CENPL    |    |    | 3  |
| III      | CENPM    |    |    | 3  |
| II       | CENPN    | 1  | 2  | 7  |
| II + III | CENPO    | 4  | 6  | 19 |
|          | CENPP    |    |    | 2  |
| III      | CENPQ    |    |    | 1  |
| III      | CENPT    |    |    |    |
| III      | CENPV    |    |    | 2  |
| III      | CENPW    |    |    |    |
| II       | CEP104   | 2  | 5  | 4  |
| III      | CEP112   | 1  |    | 1  |
|          | CEP120   |    | 3  | 6  |
| III      | CEP128   |    |    | 1  |
| III      | CEP135   |    |    |    |
|          | CEP152   |    |    | 1  |
| III      | CEP164   |    | 1  | 2  |
|          | CEP170   |    |    | 2  |
|          | CEP170P1 |    |    |    |
|          | CEP19    |    |    | 1  |
|          | CEP192   |    | 1  | 3  |
| III      | CEP250   |    | 3  | 4  |
| III      | CEP290   |    |    |    |
|          | CEP350   | 1  |    | 2  |
|          | CEP41    |    |    |    |
| III      | CEP44    |    |    |    |
| III      | CEP55    | 1  |    | 2  |
| III      | CEP57    |    |    | 3  |
| III      | CEP57L1  |    |    |    |
| III      | CEP63    |    | 1  | 2  |
|          | CEP68    |    | 1  | 3  |
| III      | CEP70    |    |    |    |
| II + III | CEP72    | 2  | 4  | 11 |
|          | CEP76    |    |    |    |
|          | CEP78    | 1  |    |    |

|          |         |   |    |    |
|----------|---------|---|----|----|
|          | CEP85   |   | 4  | 8  |
| III      | CEP89   |   | 2  | 4  |
| III      | CEP95   |   | 1  | 2  |
| II + III | CEP97   | 1 | 1  | 3  |
| II       | CEPT1   | 1 | 1  | 2  |
| II       | CERCAM  | 1 | 1  | 2  |
|          | CERK    |   | 2  | 2  |
| II       | CERS2   | 6 | 11 | 18 |
| III      | CERS4   |   | 2  | 3  |
| II       | CERS5   | 4 | 4  | 8  |
|          | CERS6   |   | 1  | 2  |
| II       | CES2    | 3 | 8  | 11 |
| III      | CETN2   | 1 |    | 2  |
| III      | CETN3   |   |    |    |
| III      | CFD     |   |    |    |
| III      | CFDP1   |   |    | 1  |
| III      | CFL1    |   | 3  | 2  |
| III      | CFL2    |   | 1  |    |
| II       | CFLAR   | 1 | 1  | 5  |
| II       | CGA     | 4 | 7  | 5  |
|          | CGGBP1  |   |    |    |
|          | CGRRF1  |   |    |    |
| II + III | CHAC1   | 8 | 8  | 9  |
| III      | CHAC2   |   | 1  | 1  |
| II       | CHAF1A  | 2 | 3  | 5  |
| III      | CHAF1B  |   |    |    |
| II + III | CHAMP1  | 2 | 6  | 10 |
| III      | CHCHD1  |   |    |    |
| III      | CHCHD10 |   | 1  |    |
| III      | CHCHD2  |   |    | 1  |
| II       | CHCHD3  | 1 | 3  | 9  |
|          | CHCHD4  |   |    | 1  |
| III      | CHCHD5  |   | 1  |    |
| III      | CHCHD6  |   |    | 1  |
| II       | CHCHD7  | 1 | 1  | 2  |
| II       | CHCHD8  | 1 | 2  | 1  |
| III      | CHD1    |   | 2  | 7  |
| III      | CHD1L   |   | 1  | 1  |
| II       | CHD2    | 4 | 7  | 11 |
| II       | CHD3    | 1 | 5  | 5  |
| II       | CHD4    | 4 | 2  | 2  |
| II + III | CHD6    | 1 | 6  | 8  |
| II + III | CHD7    | 3 | 3  | 11 |
| II + III | CHD8    | 1 | 4  | 7  |
| II + III | CHD9    | 2 | 4  | 18 |
| II + III | CHDH    | 1 | 2  | 2  |
| III      | CHEK1   |   | 1  | 2  |
| III      | CHEK2   |   |    |    |
| II       | CHERP   | 7 | 4  | 16 |
| III      | CHIC2   | 1 | 1  |    |
| II       | CHID1   | 1 | 2  | 1  |

|          |         |    |    |    |
|----------|---------|----|----|----|
| II       | CHKA    | 1  | 2  | 2  |
|          | CHM     | 1  | 1  |    |
| II + III | CHML    | 10 | 15 | 25 |
| II       | CHMP1A  | 1  | 4  | 10 |
| II + III | CHMP1B  | 2  | 2  | 3  |
| III      | CHMP2A  |    |    | 1  |
| III      | CHMP2B  |    | 1  |    |
| III      | CHMP3   |    | 1  | 1  |
| III      | CHMP4A  |    | 1  |    |
| III      | CHMP4B  |    |    | 3  |
| III      | CHMP4C  |    |    |    |
| III      | CHMP5   |    |    |    |
|          | CHMP6   |    | 1  | 4  |
|          | CHMP7   | 1  |    | 4  |
| III      | CHN1    |    |    | 1  |
| III      | CHORDC1 |    |    |    |
| II + III | CHPF    | 6  | 6  | 13 |
| II + III | CHPF2   | 4  | 7  | 15 |
| III      | CHPT1   |    | 1  | 2  |
| III      | CHRA1   | 1  |    | 1  |
|          | CHRNA5  |    |    | 1  |
|          | CHRNA9  |    | 1  | 1  |
|          | CHRN1   |    |    | 1  |
| II + III | CHST10  | 4  | 3  | 6  |
|          | CHST11  |    | 2  | 3  |
| II + III | CHST12  | 3  | 6  | 8  |
| II + III | CHST14  | 7  | 12 | 14 |
| II + III | CHST15  | 4  | 6  | 6  |
| II + III | CHST3   | 4  | 7  | 22 |
| II + III | CHSY1   | 3  | 10 | 9  |
| III      | CHTF18  |    |    |    |
| II + III | CHTF8   | 5  | 13 | 17 |
|          | CHTOP   |    | 3  | 4  |
|          | CHUK    |    |    |    |
|          | CIAO1   |    |    | 4  |
| II       | CIAPIN1 | 2  | 4  | 6  |
| III      | CIB1    |    |    | 1  |
|          | CIC     | 2  |    | 7  |
| III      | CIDEB   |    | 1  | 1  |
|          | CILP    |    | 1  | 4  |
| III      | CINP    |    | 1  | 1  |
| III      | CIR1    |    | 1  | 1  |
| III      | CIRBP   |    |    |    |
| III      | CIRH1A  |    | 2  | 2  |
| III      | CISD1   |    | 1  |    |
| III      | CISD2   |    |    | 1  |
| III      | CISD3   | 1  |    | 1  |
|          | CISH    |    | 2  | 7  |
|          | CIT     |    |    | 2  |
|          | CITED2  |    |    | 2  |
| II       | CITED4  | 4  | 1  | 8  |

|          |         |   |   |    |
|----------|---------|---|---|----|
| II       | CIZ1    | 1 | 2 | 5  |
| III      | CKAP2   |   | 2 | 2  |
|          | CKAP2L  |   |   | 1  |
| II + III | CKAP4   | 2 | 2 | 7  |
| II       | CKAP5   | 4 | 3 | 2  |
| II       | CKB     | 2 | 1 | 2  |
| III      | CKLF    | 1 |   | 1  |
| III      | CKS1B   |   | 3 | 3  |
| III      | CKS2    |   | 2 | 2  |
|          | CLASP1  |   | 3 | 4  |
|          | CLASP2  |   |   | 1  |
| III      | CLASRP  |   |   | 1  |
| III      | CLCC1   |   | 1 | 1  |
| III      | CLCN2   |   |   |    |
| II + III | CLCN3   | 1 | 2 | 2  |
| II + III | CLCN4   | 1 | 1 | 3  |
| II       | CLCN6   | 1 | 2 | 8  |
| II       | CLCN7   | 5 | 5 | 10 |
|          | CLDN12  |   | 3 | 3  |
| III      | CLDN7   |   |   |    |
|          | CLDND1  |   |   | 2  |
|          | CLEC16A |   | 1 | 6  |
| III      | CLGN    |   | 1 |    |
| III      | CLIC1   |   | 1 | 3  |
| III      | CLIC4   |   | 1 | 2  |
| II       | CLINT1  | 2 | 4 | 6  |
|          | CLIP1   |   |   | 6  |
|          | CLIP2   | 2 |   | 6  |
| III      | CLK1    |   |   |    |
| III      | CLK2    |   |   | 3  |
| III      | CLK3    |   | 1 | 1  |
| III      | CLK4    |   | 1 | 1  |
| II + III | CLMP    | 2 | 2 | 6  |
| III      | CLN3    | 1 |   |    |
|          | CLN5    |   |   |    |
| II       | CLN6    | 2 | 4 | 9  |
| III      | CLNS1A  |   |   | 2  |
|          | CLOCK   |   |   | 5  |
|          | CLP1    |   |   | 2  |
| II       | CLPB    | 3 | 4 | 10 |
| III      | CLPP    |   | 2 | 1  |
| II       | CLPTM1  | 4 | 7 | 7  |
| II       | CLPTM1L | 7 | 4 | 8  |
| III      | CLPX    |   |   |    |
| III      | CLSPN   |   |   | 3  |
| II       | CLSTN1  | 6 | 5 | 9  |
| III      | CLSTN3  |   | 2 | 4  |
| II       | CLTA    | 2 | 2 | 2  |
| III      | CLTB    |   | 1 | 2  |
| II + III | CLTC    | 2 | 8 | 6  |
|          | CLTCL1  |   |   |    |

|          |         |   |   |    |
|----------|---------|---|---|----|
| II       | CLU     | 5 | 4 | 2  |
| III      | CLUAP1  |   |   |    |
| III      | CMAS    |   |   |    |
| III      | CMBL    |   | 1 | 3  |
| III      | CMC1    |   |   | 1  |
| III      | CMC2    |   |   |    |
| II       | CMIP    | 4 | 4 | 5  |
| III      | CMPK1   |   |   |    |
|          | CMTM3   |   | 1 | 2  |
| II       | CMTM4   | 1 | 1 | 2  |
| III      | CMTM6   |   |   |    |
| III      | CMTM7   |   |   |    |
| III      | CMTM8   |   |   | 1  |
| II       | CNBP    | 2 | 2 | 4  |
|          | CNDP2   |   |   | 2  |
| III      | CNEP1R1 |   |   | 1  |
| II       | CNIH    | 1 | 2 | 4  |
| III      | CNIH4   |   | 3 | 3  |
|          | CNKSR3  |   | 1 | 3  |
| III      | CNN2    |   |   | 2  |
| II + III | CNNM2   | 6 | 6 | 14 |
| III      | CNNM3   |   | 3 | 2  |
|          | CNNM4   |   |   | 8  |
|          | CNO     | 1 |   | 3  |
| II + III | CNOT1   | 1 | 6 | 4  |
| III      | CNOT10  |   | 1 |    |
|          | CNOT2   | 2 | 2 |    |
| II       | CNOT3   | 1 | 2 | 3  |
| III      | CNOT4   |   | 1 | 6  |
| II + III | CNOT6   | 3 | 4 | 8  |
| II       | CNOT6L  | 1 | 2 | 5  |
| III      | CNOT7   |   | 1 | 4  |
| II       | CNOT8   | 1 | 2 | 2  |
| II       | CNP     | 2 | 1 | 6  |
| II       | CNPPD1  | 1 | 2 | 3  |
| II       | CNPY3   | 2 | 7 | 7  |
| III      | CNPY4   |   |   | 1  |
| II + III | CNST    | 1 | 3 | 5  |
| III      | CNTLN   |   |   | 1  |
| III      | CNTNAP1 |   |   |    |
| III      | CNTROB  | 1 |   | 3  |
| III      | COA5    |   |   |    |
| III      | COASY   | 1 |   | 4  |
| II + III | COBL    | 1 | 3 | 5  |
| II       | COBLL1  | 1 | 1 | 1  |
| II       | COBRA1  | 1 | 1 | 3  |
| II + III | COG1    | 2 | 2 | 6  |
|          | COG2    |   |   | 1  |
|          | COG3    |   |   |    |
| III      | COG4    | 1 |   |    |
| III      | COG5    |   |   | 4  |

|     |          |    |    |    |
|-----|----------|----|----|----|
| III | COG6     |    |    |    |
|     | COG7     | 2  |    | 1  |
|     | COIL     |    | 1  | 1  |
|     | COL12A1  |    |    | 2  |
| III | COL16A1  |    |    |    |
| II  | COL18A1  | 2  | 2  | 4  |
| III | COL1A1   |    | 1  | 4  |
|     | COL4A1   |    | 1  | 4  |
| II  | COL4A2   | 3  | 2  | 5  |
|     | COL4A3BP |    | 1  | 4  |
|     | COL4A5   |    |    |    |
| II  | COL5A1   | 11 | 12 | 16 |
| II  | COL7A1   | 4  | 3  | 4  |
| III | COL9A3   |    |    |    |
| III | COMMD1   |    | 1  |    |
| III | COMMD10  |    |    | 1  |
| III | COMMD2   |    |    | 1  |
| III | COMMD4   | 1  |    | 2  |
| II  | COMMD5   | 1  | 1  | 1  |
| III | COMMD6   |    |    | 1  |
| III | COMMD7   | 1  |    |    |
| III | COMMD8   |    |    |    |
| III | COMMD9   |    | 1  |    |
| III | COMT     |    | 2  | 1  |
| III | COMTD1   |    |    |    |
| II  | COPA     | 2  | 3  | 4  |
|     | COPB1    |    | 1  | 3  |
| II  | COPB2    | 4  | 1  | 4  |
| II  | COPE     | 2  | 2  | 1  |
| III | COPG1    | 1  |    | 1  |
|     | COPG2    |    |    | 1  |
|     | COPS2    |    | 4  | 11 |
| III | COPS3    |    | 2  | 2  |
| III | COPS4    | 1  |    |    |
| III | COPS5    |    | 1  | 1  |
| III | COPS6    |    |    | 1  |
| III | COPS7A   | 1  |    | 1  |
| II  | COPS7B   | 1  | 2  | 3  |
| III | COPS8    |    |    |    |
| II  | COPZ1    | 1  | 5  | 8  |
| III | COPZ2    |    |    |    |
| III | COQ10A   |    | 1  | 2  |
| III | COQ10B   |    |    | 1  |
| III | COQ2     |    |    | 1  |
| III | COQ3     |    |    |    |
| III | COQ4     |    | 3  | 2  |
|     | COQ5     | 1  |    | 2  |
| III | COQ6     |    |    |    |
| III | COQ7     |    |    | 2  |
| III | COQ9     | 1  |    | 7  |
| III | CORO1B   | 1  |    |    |

|          |         |   |    |    |
|----------|---------|---|----|----|
|          | CORO1C  |   | 1  | 8  |
|          | CORO2A  |   |    | 2  |
| III      | COTL1   |   | 1  | 5  |
| III      | COX10   |   | 3  | 3  |
| III      | COX11   |   |    |    |
| III      | COX14   |   |    | 1  |
| III      | COX15   |   | 3  | 5  |
| III      | COX17   |   |    |    |
| III      | COX18   |   |    |    |
|          | COX19   |   |    | 4  |
| III      | COX20   |   |    | 1  |
| III      | COX4I1  |   | 2  | 1  |
| III      | COX5A   |   | 1  |    |
| III      | COX5B   |   |    |    |
| II       | COX6A1  | 1 | 3  | 3  |
| III      | COX6B1  |   |    | 3  |
| III      | COX6C   |   |    |    |
| III      | COX7A2  |   |    | 1  |
| III      | COX7A2L |   |    |    |
| III      | COX7B   |   |    |    |
| III      | COX7C   |   |    |    |
| II       | COX8A   | 1 | 3  | 3  |
| III      | CPA4    |   |    |    |
| II + III | CPD     | 1 | 2  | 4  |
|          | CPEB1   |   |    |    |
| II + III | CPEB2   | 1 | 1  | 2  |
|          | CPEB4   |   | 3  | 7  |
| III      | CPNE2   | 1 |    | 1  |
| II       | CPNE3   | 2 | 1  | 2  |
| III      | CPNE7   | 1 |    | 3  |
|          | CPNE8   |   | 1  | 1  |
| III      | CPOX    |   |    | 1  |
|          | CPPED1  |   |    | 1  |
| II + III | CPS1    | 6 | 12 | 4  |
| III      | CPSF1   |   |    |    |
|          | CPSF2   |   | 1  | 1  |
| III      | CPSF3   |   |    | 1  |
| III      | CPSF3L  |   | 1  | 1  |
| III      | CPSF4   |   | 1  | 3  |
| III      | CPSF6   |   | 1  | 2  |
| II + III | CPSF7   | 2 | 6  | 19 |
| III      | CPT1A   |   | 4  | 5  |
|          | CPT2    | 1 |    | 3  |
| III      | CPVL    |   | 1  |    |
| III      | CPZ     |   | 1  | 2  |
| III      | CRADD   |   |    |    |
| II       | CRAMP1L | 4 | 2  | 9  |
| III      | CRAT    |   | 1  | 2  |
| III      | CRBN    |   | 1  |    |
| III      | CRCP    |   | 2  | 4  |
|          | CREB1   |   | 2  | 5  |

|          |            |   |    |    |
|----------|------------|---|----|----|
| III      | CREB3      |   |    |    |
| II       | CREB3L2    | 5 | 9  | 8  |
| III      | CREB3L4    |   |    |    |
| II + III | CREBBP     | 4 | 11 | 12 |
|          | CREBL2     |   | 2  | 3  |
| II + III | CREBZF     | 6 | 8  | 15 |
| II       | CREG1      | 2 | 3  | 2  |
| III      | CRELD1     |   | 1  | 1  |
| III      | CRELD2     |   | 2  | 1  |
|          | CREM       | 1 |    | 1  |
| II + III | CRIM1      | 3 | 6  | 8  |
| III      | CRIP1      |   |    |    |
| III      | CRIP2      |   |    | 1  |
| III      | CRIPT      |   |    |    |
| II + III | CRK        | 4 | 10 | 14 |
| II + III | CRKL       | 4 | 7  | 24 |
| III      | CRLF1      |   |    |    |
| III      | CRLF3      |   |    |    |
| III      | CRLS1      |   | 1  |    |
| III      | CRMP1      |   |    |    |
| III      | CRNDE      |   |    |    |
|          | CRNKL1     |   |    | 1  |
| III      | CROCCP2    |   | 1  | 4  |
| III      | CROT       |   |    |    |
| II       | CRTAP      | 5 | 4  | 8  |
| II       | CRTC2      | 1 | 5  | 7  |
| II + III | CRTC3      | 2 | 11 | 23 |
|          | CRY1       |   |    |    |
| III      | CRY2       |   | 1  |    |
| III      | CRYBB2P1   |   | 1  |    |
| III      | CRYL1      |   |    |    |
| III      | CRYZ       |   |    |    |
| III      | CRYZL1     |   |    | 1  |
| II       | CS         | 1 | 11 | 11 |
| III      | CSAD       |   |    |    |
| III      | CSDA       |   | 2  | 2  |
| II       | CSDE1      | 2 | 2  | 5  |
| II       | CSE1L      | 2 | 6  | 3  |
| II + III | CSF1       | 3 | 7  | 15 |
|          | CSGALNACT1 |   | 2  | 2  |
|          | CSGALNACT2 | 1 |    | 4  |
| III      | CSK        |   |    | 1  |
| II       | CSNK1A1    | 2 | 2  | 3  |
| II       | CSNK1D     | 5 | 8  | 25 |
| II       | CSNK1E     | 1 | 2  | 9  |
|          | CSNK1G1    |   | 2  | 5  |
|          | CSNK1G2    | 1 |    | 4  |
|          | CSNK1G3    | 1 | 1  |    |
| II       | CSNK2A1    | 1 | 3  | 5  |
| II       | CSNK2A2    | 1 | 1  | 7  |
| III      | CSNK2B     |   | 2  | 2  |



|          |           |   |    |    |
|----------|-----------|---|----|----|
|          | CSPG5     |   |    | 4  |
| III      | CSPP1     |   |    |    |
| II + III | CSRNP1    | 9 | 11 | 22 |
| II + III | CSRNP2    | 2 | 4  | 13 |
| II       | CSRP1     | 4 | 5  | 7  |
| III      | CSRP2     |   |    |    |
| III      | CST3      | 2 |    | 1  |
| III      | CSTB      |   | 1  | 1  |
| II + III | CSTF1     | 8 | 9  | 10 |
| III      | CSTF2     |   |    |    |
| II + III | CSTF2T    | 2 | 4  | 10 |
| III      | CSTF3     |   |    |    |
| III      | CTAGE5    |   | 1  |    |
| II       | CTBP1     | 8 | 8  | 14 |
| II + III | CTBP1-AS1 | 1 | 2  | 11 |
|          | CTBP2     |   | 1  | 1  |
| III      | CTBS      |   |    |    |
| II       | CTC1      | 1 | 1  | 3  |
|          | CTCF      | 2 |    |    |
| II       | CTDNEP1   | 3 | 8  | 12 |
|          | CTDP1     | 1 |    | 2  |
| II       | CTDSP1    | 1 | 2  | 6  |
| II       | CTDSP2    | 1 | 2  | 7  |
|          | CTDSPL    |   |    | 3  |
|          | CTDSPL2   |   | 2  | 4  |
| II + III | CTGF      | 2 | 2  | 3  |
| II       | CTH       | 1 | 2  | 4  |
|          | CTIF      | 2 |    | 3  |
| II       | CTNNA1    | 2 | 7  | 4  |
| III      | CTNNAL1   | 1 |    | 1  |
| II + III | CTNNB1    | 2 | 2  | 4  |
| III      | CTNNBIP1  |   |    | 1  |
| III      | CTNNBL1   |   |    | 2  |
| II       | CTNS      | 2 | 1  | 8  |
| III      | CTPS2     |   |    | 1  |
|          | CTR9      |   |    |    |
| II       | CTSA      | 4 | 3  | 7  |
| II       | CTSB      | 1 | 3  | 2  |
|          | CTSC      |   | 1  | 4  |
| II       | CTSD      | 4 | 5  | 7  |
| III      | CTSF      |   |    |    |
| III      | CTSL1     |   |    |    |
| III      | CTSL2     |   |    |    |
| II       | CTSZ      | 6 | 7  | 10 |
| II       | CTTN      | 1 | 3  | 2  |
|          | CTTNBP2   |   | 1  | 1  |
|          | CTTNBP2NL |   | 7  | 14 |
| III      | CTU1      |   |    | 3  |
| III      | CTU2      |   |    |    |
|          | CUEDC1    |   |    |    |
| III      | CUEDC2    |   |    |    |

|          |          |    |    |    |
|----------|----------|----|----|----|
|          | CUL1     |    | 2  | 1  |
|          | CUL2     |    |    |    |
| III      | CUL3     |    | 1  |    |
| II       | CUL4A    | 2  | 3  | 3  |
| III      | CUL4B    |    | 1  | 2  |
|          | CUL5     | 1  |    | 2  |
|          | CUL7     |    | 1  | 1  |
|          | CUL9     |    |    | 2  |
| III      | CUTA     |    |    |    |
| III      | CUTC     |    |    | 1  |
| II       | CUX1     | 2  | 13 | 24 |
| III      | CWC15    |    |    |    |
| III      | CWC22    |    |    |    |
| III      | CWC25    |    |    | 1  |
| III      | CWC27    |    |    |    |
| III      | CWF19L1  |    |    |    |
| III      | CWF19L2  |    |    |    |
| II       | CXADR    | 1  | 3  | 1  |
| III      | CXCL16   |    |    |    |
| II + III | CXCR4    | 11 | 15 | 13 |
| III      | CXXC1    |    |    |    |
|          | CXXC4    |    | 3  | 1  |
|          | CXXC5    |    |    | 1  |
|          | CXorf38  |    |    | 3  |
|          | CXorf40A |    | 3  | 4  |
|          | CXorf40B |    | 1  |    |
| III      | CXorf56  |    |    |    |
|          | CXorf57  |    |    |    |
| II       | CXorf69  | 1  | 3  | 6  |
| II       | CYB561   | 4  | 3  | 13 |
| II       | CYB561D2 | 1  | 1  | 3  |
| III      | CYB5A    |    |    |    |
| III      | CYB5B    | 1  |    | 2  |
|          | CYB5D1   |    | 1  | 4  |
|          | CYB5D2   |    |    | 1  |
| III      | CYB5R1   |    |    |    |
| III      | CYB5R2   |    |    |    |
| II       | CYB5R3   | 3  | 2  | 3  |
| III      | CYB5R4   | 1  |    |    |
|          | CYB5RL   | 1  |    | 5  |
| II       | CYBA     | 1  | 1  | 2  |
| III      | CYBASC3  |    | 2  | 3  |
| III      | CYBRD1   |    |    | 1  |
| III      | CYC1     |    | 1  | 1  |
| III      | CYCS     |    | 1  | 4  |
|          | CYFIP1   |    | 1  | 1  |
|          | CYFIP2   |    |    |    |
| II       | CYHR1    | 3  | 2  | 3  |
|          | CYLD     |    | 3  | 1  |
| III      | CYP11A1  |    |    |    |
| II + III | CYP1B1   | 11 | 16 | 17 |

|          |         |    |    |    |
|----------|---------|----|----|----|
| II       | CYP26B1 | 1  | 2  | 9  |
|          | CYP2R1  |    |    | 2  |
| III      | CYP2S1  |    |    |    |
|          | CYP2U1  |    | 1  | 2  |
| II       | CYP51A1 | 3  | 5  | 9  |
| II       | CYR61   | 1  | 7  | 4  |
| III      | CYSTM1  |    |    | 1  |
| II       | CYTH1   | 2  | 2  | 5  |
| II       | CYTH2   | 2  | 3  | 3  |
| II       | CYTH3   | 1  | 4  | 9  |
| III      | D2HGDH  |    |    |    |
|          | DAAM1   |    |    | 1  |
| II       | DAB2    | 2  | 5  | 11 |
|          | DAB2IP  |    | 4  | 8  |
| II       | DAD1    | 1  | 2  | 1  |
| II + III | DAG1    | 22 | 35 | 46 |
| II       | DAGLB   | 2  | 2  | 5  |
| III      | DAK     |    |    | 2  |
| III      | DALRD3  |    |    |    |
| III      | DANCR   |    | 1  | 1  |
| II       | DAP     | 6  | 5  | 8  |
| III      | DAP3    |    |    | 1  |
| II       | DAPK3   | 1  | 3  | 7  |
| III      | DARS    |    |    |    |
|          | DARS2   |    |    |    |
| II       | DAXX    | 1  | 3  | 5  |
| II       | DAZAP1  | 2  | 3  | 7  |
| II       | DAZAP2  | 1  | 1  | 2  |
|          | DBF4    |    | 3  | 2  |
| III      | DBF4B   |    | 2  | 3  |
| III      | DBI     |    | 1  |    |
| III      | DBN1    | 1  |    | 1  |
| II       | DBNDD1  | 2  | 1  | 2  |
| II       | DBNDD2  | 3  | 6  | 12 |
| III      | DBNL    | 2  |    |    |
| III      | DBP     |    |    |    |
|          | DBR1    |    |    | 4  |
|          | DBT     |    | 1  |    |
|          | DCAF10  |    | 3  | 5  |
| III      | DCAF11  |    |    | 1  |
| III      | DCAF12  |    |    | 2  |
| III      | DCAF13  |    |    |    |
| II       | DCAF15  | 2  | 3  | 2  |
|          | DCAF16  |    | 3  | 7  |
| III      | DCAF17  |    | 1  |    |
|          | DCAF4   |    |    |    |
| II       | DCAF5   | 1  | 4  | 10 |
| III      | DCAF6   |    | 1  |    |
| II       | DCAF7   | 2  | 6  | 9  |
| II       | DCAF8   | 1  | 3  | 4  |
| III      | DCAKD   |    |    |    |

|          |         |   |   |    |
|----------|---------|---|---|----|
| II + III | DCBLD1  | 4 | 3 | 3  |
|          | DCBLD2  | 1 |   | 7  |
| III      | DCK     | 1 |   | 2  |
|          | DCLK2   |   |   |    |
|          | DCLRE1A |   |   |    |
| II + III | DCLRE1B | 1 | 4 | 8  |
|          | DCLRE1C |   |   | 2  |
|          | DCP1A   | 1 |   | 1  |
|          | DCP1B   |   |   |    |
|          | DCP2    |   |   | 2  |
| III      | DCPS    |   |   |    |
| III      | DCTD    |   | 3 | 3  |
| III      | DCTN1   |   | 1 |    |
| III      | DCTN2   |   | 1 | 1  |
| III      | DCTN3   |   |   |    |
| II       | DCTN4   | 1 | 3 | 5  |
| II + III | DCTN5   | 1 | 6 | 12 |
| III      | DCTN6   |   |   |    |
| III      | DCTPP1  |   | 1 | 1  |
|          | DCUN1D1 |   | 2 | 4  |
| II + III | DCUN1D2 | 1 | 2 | 4  |
| III      | DCUN1D4 |   |   | 2  |
| III      | DCUN1D5 | 2 | 1 |    |
| III      | DCXR    |   | 1 | 1  |
| II       | DDA1    | 4 | 5 | 6  |
| III      | DDAH1   |   |   | 1  |
| III      | DDAH2   |   |   |    |
|          | DDB1    |   | 1 | 4  |
| II       | DDB2    | 1 | 2 | 2  |
|          | DDHD1   | 1 |   |    |
|          | DDHD2   |   | 2 | 1  |
| III      | DDIT3   |   | 1 | 3  |
| II + III | DDIT4   | 5 | 5 | 10 |
| II       | DDOST   | 2 | 4 | 6  |
| II       | DDR1    | 5 | 9 | 6  |
|          | DDR2    |   | 1 | 3  |
| III      | DDRGK1  |   | 1 | 1  |
| III      | DDT     |   | 1 | 2  |
| III      | DDTL    |   | 1 |    |
| III      | DDX1    |   |   | 1  |
| III      | DDX10   | 1 |   |    |
| III      | DDX11   |   |   | 5  |
| II       | DDX17   | 1 | 9 | 19 |
| III      | DDX18   |   |   |    |
|          | DDX19A  |   | 2 | 4  |
| III      | DDX19B  |   |   | 1  |
|          | DDX20   |   |   | 4  |
| II       | DDX21   | 4 | 2 | 6  |
| II       | DDX23   | 5 | 5 | 13 |
| II + III | DDX24   | 2 | 2 | 8  |
| II       | DDX27   | 2 | 2 | 4  |

|          |         |   |    |    |
|----------|---------|---|----|----|
|          | DDX28   |   |    | 3  |
|          | DDX31   |   | 2  | 4  |
| III      | DDX39A  | 1 | 1  |    |
| II       | DDX3X   | 5 | 10 | 12 |
| III      | DDX41   |   |    | 3  |
| II       | DDX42   | 3 | 4  | 2  |
| III      | DDX46   |   | 1  | 1  |
| II       | DDX47   | 1 | 1  | 3  |
| III      | DDX49   | 1 | 1  |    |
| II       | DDX5    | 1 | 1  | 9  |
| III      | DDX50   |   |    | 1  |
| III      | DDX51   |   | 1  | 3  |
| III      | DDX52   |   |    | 2  |
| III      | DDX54   | 1 | 1  |    |
| II       | DDX55   | 1 | 1  | 3  |
| III      | DDX56   | 1 |    | 2  |
| II       | DDX59   | 1 | 1  | 2  |
| II + III | DDX6    | 4 | 13 | 25 |
| III      | DEAF1   |   |    | 2  |
| III      | DECR1   |   |    | 1  |
| III      | DECR2   |   |    |    |
| II + III | DEDD    | 2 | 6  | 10 |
|          | DEDD2   |   | 2  | 8  |
| III      | DEF8    |   | 3  | 4  |
| II + III | DEGS1   | 4 | 11 | 13 |
| II       | DEK     | 1 | 3  | 5  |
|          | DEM1    |   |    |    |
| III      | DENND1A |   | 1  | 5  |
|          | DENND1B |   |    | 1  |
|          | DENND3  |   |    |    |
|          | DENND4A |   |    |    |
| II       | DENND4B | 2 | 1  | 2  |
|          | DENND4C |   |    | 1  |
| II + III | DENND5A | 3 | 4  | 12 |
| II + III | DENND5B | 3 | 3  | 4  |
| III      | DENR    |   |    |    |
| III      | DEPDC1  |   | 3  | 2  |
|          | DEPDC1B |   |    | 1  |
| III      | DEPDC5  |   | 1  | 1  |
| III      | DEPDC7  |   |    |    |
| III      | DERA    |   |    |    |
| II       | DERL1   | 2 | 2  | 1  |
| II       | DERL2   | 1 | 3  | 4  |
|          | DET1    |   |    | 1  |
|          | DFFA    |   | 3  | 5  |
| III      | DFFB    |   |    |    |
|          | DFNA5   |   |    |    |
| II       | DFNB31  | 3 | 2  | 8  |
| III      | DGAT1   |   |    | 1  |
| III      | DGAT2   |   |    |    |
| II + III | DGCR14  | 1 | 1  | 8  |

|          |            |    |    |    |
|----------|------------|----|----|----|
| II       | DGCR2      | 11 | 11 | 18 |
| III      | DGCR6      |    |    |    |
| III      | DGCR6L     |    |    | 2  |
|          | DGCR8      |    |    | 4  |
| III      | DGKA       |    |    |    |
| II       | DGKD       | 2  | 4  | 5  |
|          | DGKH       |    |    | 2  |
|          | DGKQ       |    | 1  | 1  |
| II       | DGKZ       | 2  | 5  | 9  |
| III      | DGUOK      |    | 1  | 1  |
| II       | DHCR24     | 14 | 23 | 29 |
| II       | DHCR7      | 11 | 11 | 16 |
| III      | DHDDS      |    | 2  | 8  |
|          | DHODH      |    | 1  | 1  |
| III      | DHPS       |    |    |    |
| III      | DHRS1      |    |    |    |
| III      | DHRS11     |    |    |    |
|          | DHRS13     |    | 3  | 3  |
| III      | DHRS2      |    | 1  |    |
| II       | DHRS3      | 4  | 1  | 6  |
| III      | DHRS4      |    |    | 1  |
| III      | DHRS4L2    |    | 1  | 1  |
| III      | DHRS7      |    | 1  | 1  |
| II       | DHRS7B     | 1  | 1  | 2  |
|          | DHTKD1     |    | 2  | 1  |
| II + III | DHX15      | 1  | 1  | 8  |
| III      | DHX16      |    |    | 2  |
|          | DHX29      |    |    |    |
| II       | DHX30      | 2  | 4  | 10 |
|          | DHX32      |    | 2  |    |
| II + III | DHX33      | 3  | 5  | 8  |
|          | DHX34      | 2  |    | 2  |
|          | DHX35      |    |    |    |
|          | DHX36      |    |    | 1  |
| III      | DHX37      |    |    |    |
| II       | DHX38      | 1  | 2  | 3  |
|          | DHX40      |    |    | 1  |
|          | DHX57      |    |    | 2  |
|          | DHX8       | 1  |    | 2  |
| II       | DHX9       | 2  | 2  | 2  |
| II       | DIABLO     | 2  | 2  | 2  |
| II       | DIAPH1     | 9  | 14 | 13 |
| III      | DIAPH2     | 1  |    | 2  |
| III      | DIAPH3     |    |    | 5  |
| II + III | DICER1     | 2  | 2  | 3  |
|          | DICER1-AS1 |    |    |    |
| II + III | DIDO1      | 8  | 9  | 24 |
|          | DIEXF      |    |    | 3  |
| III      | DIMT1      |    | 1  |    |
|          | DIP2A      |    |    | 4  |
| II + III | DIP2B      | 1  | 3  | 4  |

|          |         |   |   |    |
|----------|---------|---|---|----|
|          | DIRAS1  | 1 |   | 6  |
| III      | DIRC2   |   |   | 2  |
| II       | DIS3    | 1 | 1 | 2  |
|          | DIS3L   |   |   | 1  |
| III      | DIS3L2  |   |   | 1  |
| II + III | DISP1   | 2 | 4 | 7  |
| II + III | DIXDC1  | 2 | 3 | 5  |
| II       | DKC1    | 2 | 3 | 3  |
|          | DKK1    |   | 2 | 3  |
| II       | DLAT    | 1 | 1 | 2  |
| III      | DLD     |   |   | 3  |
| III      | DLEU1   |   | 1 | 1  |
| III      | DLG1    |   |   |    |
|          | DLG3    |   | 1 | 3  |
| III      | DLG4    |   | 1 | 1  |
| II + III | DLG5    | 3 | 3 | 7  |
| II       | DLGAP4  | 2 | 3 | 9  |
| III      | DLGAP5  |   |   |    |
| III      | DLL3    |   |   |    |
| III      | DLST    | 1 |   | 3  |
| II + III | DLX1    | 2 | 7 | 9  |
| II       | DLX2    | 1 | 3 | 5  |
| II + III | DLX4    | 1 | 2 | 10 |
|          | DLX6    |   |   | 3  |
| III      | DMAP1   |   |   |    |
| II       | DMD     | 1 | 2 | 2  |
| III      | DMPK    |   | 1 | 1  |
|          | DMRTA1  |   |   | 1  |
|          | DMTF1   |   |   | 4  |
| II       | DMWD    | 2 | 2 | 12 |
|          | DMXL1   | 1 |   |    |
|          | DMXL2   |   |   | 2  |
|          | DNA2    |   |   |    |
|          | DNAAF2  |   |   |    |
| III      | DNAAF3  |   |   |    |
| III      | DNAH14  |   |   | 1  |
| II       | DNAJA1  | 1 | 2 | 4  |
| III      | DNAJA2  |   |   | 2  |
| III      | DNAJA3  |   |   | 4  |
| II + III | DNAJB1  | 4 | 3 | 14 |
| III      | DNAJB11 | 1 | 1 |    |
| II       | DNAJB12 | 1 | 2 | 5  |
|          | DNAJB14 |   |   |    |
| II       | DNAJB2  | 1 | 2 | 4  |
|          | DNAJB4  |   |   | 1  |
| III      | DNAJB5  |   |   |    |
| III      | DNAJB6  |   | 1 | 1  |
|          | DNAJB9  |   | 1 | 2  |
| III      | DNAJC1  |   |   |    |
|          | DNAJC10 |   |   |    |
| III      | DNAJC11 |   | 2 | 4  |

|          |          |   |   |    |
|----------|----------|---|---|----|
| III      | DNAJC12  |   |   |    |
|          | DNAJC13  |   |   |    |
| II + III | DNAJC14  | 2 | 2 | 5  |
| III      | DNAJC15  |   |   |    |
|          | DNAJC16  |   | 2 | 3  |
| III      | DNAJC17  |   |   |    |
| III      | DNAJC18  |   |   | 1  |
| III      | DNAJC19  |   |   |    |
| III      | DNAJC2   |   |   | 1  |
| II       | DNAJC21  | 2 | 3 | 4  |
|          | DNAJC22  |   |   |    |
| III      | DNAJC24  |   | 1 | 1  |
| III      | DNAJC25  |   |   | 6  |
| II       | DNAJC3   | 3 | 2 | 4  |
| II + III | DNAJC30  | 1 | 5 | 7  |
| III      | DNAJC4   |   |   |    |
| II       | DNAJC5   | 4 | 2 | 9  |
| II + III | DNAJC6   | 1 | 1 | 4  |
| II       | DNAJC7   | 1 | 1 | 1  |
| II       | DNAJC8   | 1 | 2 | 3  |
| III      | DNAJC9   |   |   | 3  |
| III      | DNAL1    |   |   | 1  |
| III      | DNAL4    |   | 1 |    |
| III      | DNASE1L1 |   |   | 3  |
| II       | DNASE2   | 3 | 4 | 5  |
| III      | DNER     |   |   |    |
| III      | DNLZ     | 1 | 1 |    |
|          | DNM1L    |   | 1 | 3  |
| III      | DNM2     |   | 1 | 4  |
|          | DNMBP    |   | 3 | 4  |
| III      | DNMT1    | 1 |   | 4  |
| III      | DNMT3A   |   |   |    |
| III      | DNMT3B   |   |   | 1  |
| III      | DNPEP    |   |   |    |
| III      | DNTTIP1  |   |   |    |
| II       | DNTTIP2  | 1 | 1 | 4  |
|          | DOCK1    |   |   |    |
|          | DOCK10   |   |   |    |
|          | DOCK4    |   |   |    |
| II + III | DOCK5    | 2 | 5 | 11 |
| III      | DOCK6    |   |   |    |
|          | DOCK7    |   |   |    |
|          | DOCK9    |   |   |    |
| III      | DOHH     |   |   | 2  |
|          | DOK1     |   | 1 | 2  |
| III      | DOK4     |   |   | 4  |
| II + III | DOLK     | 1 | 2 | 2  |
| II       | DOLPP1   | 2 | 7 | 10 |
| II       | DOM3Z    | 1 | 3 | 2  |
| II + III | DONSON   | 3 | 2 | 5  |
|          | DOPEY1   |   | 1 | 2  |



|          |         |   |   |    |
|----------|---------|---|---|----|
| II       | DOT1L   | 1 | 4 | 10 |
| II       | DPAGT1  | 1 | 5 | 5  |
| III      | DPCD    |   |   | 1  |
| III      | DPF1    |   | 1 |    |
| III      | DPF2    |   |   | 1  |
| II       | DPH1    | 2 | 5 | 6  |
| II       | DPH2    | 2 | 4 | 5  |
|          | DPH3    |   | 1 | 1  |
| III      | DPH5    |   |   |    |
| III      | DPM1    | 1 |   |    |
| II       | DPM2    | 1 | 6 | 6  |
| III      | DPM3    |   |   | 1  |
| III      | DPP3    |   |   | 2  |
| II       | DPP7    | 4 | 3 | 3  |
|          | DPP8    |   |   |    |
| II       | DPP9    | 2 | 1 | 4  |
|          | DPY19L1 |   | 1 | 3  |
|          | DPY19L4 |   |   |    |
| III      | DPY30   |   | 1 |    |
| II       | DPYSL2  | 4 | 1 | 7  |
| III      | DPYSL5  |   | 1 | 1  |
| II       | DR1     | 4 | 4 | 6  |
|          | DRAM1   | 1 |   | 2  |
| III      | DRAM2   |   |   | 2  |
| III      | DRAP1   | 1 |   |    |
| III      | DRG1    | 1 |   | 1  |
| III      | DRG2    |   | 1 | 1  |
| II       | DROSHA  | 3 | 4 | 7  |
| III      | DSCC1   |   |   |    |
|          | DSCR3   |   | 2 | 2  |
| II + III | DSE     | 1 | 4 | 17 |
|          | DSEL    |   | 3 | 8  |
| II       | DSG2    | 2 | 4 | 5  |
|          | DSN1    |   | 1 | 5  |
| II       | DSP     | 5 | 2 | 6  |
| III      | DSTN    |   |   |    |
|          | DSTNP2  |   |   |    |
| II + III | DSTYK   | 1 | 1 | 2  |
| III      | DTD1    |   |   | 1  |
|          | DTL     |   |   | 4  |
| III      | DTNB    |   |   | 1  |
| III      | DTNBP1  | 1 |   | 1  |
| III      | DTWD1   |   |   | 1  |
| III      | DTWD2   |   |   | 1  |
|          | DTX3L   | 1 |   | 1  |
| III      | DTYMK   |   |   |    |
| III      | DUS1L   |   |   | 1  |
| III      | DUS2L   |   | 1 |    |
| III      | DUS3L   |   |   | 2  |
| III      | DUS4L   |   |   |    |
| II + III | DUSP1   | 3 | 2 | 9  |

|          |          |   |    |    |
|----------|----------|---|----|----|
|          | DUSP10   |   | 2  | 1  |
| III      | DUSP11   |   |    | 3  |
|          | DUSP12   | 1 |    |    |
| II       | DUSP14   | 1 | 4  | 6  |
| II + III | DUSP16   | 6 | 11 | 28 |
| II       | DUSP2    | 1 | 1  | 3  |
| III      | DUSP22   |   |    |    |
| III      | DUSP23   |   |    |    |
|          | DUSP3    | 2 |    | 4  |
| II + III | DUSP4    | 8 | 3  | 11 |
| II       | DUSP7    | 4 | 2  | 2  |
| III      | DUSP9    |   |    |    |
| III      | DUT      | 1 |    | 1  |
| II       | DVL1     | 1 | 1  | 5  |
| III      | DVL2     |   | 1  | 1  |
| III      | DVL3     |   | 1  | 1  |
| III      | DYM      |   |    | 1  |
| II       | DYNC1H1  | 5 | 3  | 5  |
| III      | DYNC1I2  |   |    |    |
| II       | DYNC1LI1 | 1 | 1  | 1  |
|          | DYNC1LI2 | 1 | 1  |    |
|          | DYNC2H1  |   |    |    |
| III      | DYNC2LI1 |   |    |    |
| II       | DYNLL1   | 2 | 6  | 5  |
| II       | DYNLL2   | 1 | 2  | 3  |
| II       | DYNLRB1  | 1 | 2  | 2  |
| III      | DYNLT1   |   |    |    |
| III      | DYNLT3   |   |    |    |
| II + III | DYRK1A   | 2 | 5  | 21 |
| III      | DYRK1B   |   | 1  | 4  |
| II + III | DYRK2    | 3 | 3  | 8  |
| II + III | DYRK3    | 2 | 1  | 4  |
| III      | DYRK4    |   | 1  |    |
|          | DZIP1L   | 1 |    | 2  |
| III      | DZIP3    |   |    |    |
| II       | E2F1     | 1 | 3  | 8  |
| II       | E2F2     | 1 | 1  | 7  |
| II + III | E2F3     | 7 | 14 | 16 |
| II       | E2F4     | 2 | 4  | 8  |
| III      | E2F5     |   |    |    |
|          | E2F6     |   | 3  | 2  |
| II + III | E2F7     | 3 | 2  | 2  |
|          | E2F8     | 1 |    | 3  |
| III      | E4F1     |   |    | 1  |
|          | EAF1     |   | 3  | 6  |
| III      | EAF2     |   |    |    |
| III      | EAPP     |   |    | 1  |
|          | EARS2    |   | 6  | 10 |
|          | EBAG9    |   |    | 1  |
| III      | EBNA1BP2 |   | 1  |    |
| II       | EBP      | 3 | 2  | 5  |

|          |         |    |    |    |
|----------|---------|----|----|----|
| II       | EBPL    | 1  | 2  | 2  |
| III      | ECD     |    |    |    |
| II       | ECE1    | 13 | 23 | 26 |
| III      | ECE2    |    |    | 2  |
| III      | ECH1    |    | 1  |    |
| II       | ECHDC1  | 1  | 1  | 1  |
|          | ECHDC3  |    |    |    |
| II       | ECHS1   | 2  | 1  | 1  |
| III      | ECI1    | 1  |    | 4  |
| III      | ECI2    |    |    | 1  |
| III      | ECSIT   |    |    |    |
| III      | ECT2    | 1  |    |    |
|          | EDC3    |    | 3  | 6  |
| III      | EDC4    | 2  |    | 2  |
| II + III | EDEM1   | 1  | 3  | 2  |
| II       | EDEM2   | 1  | 3  | 3  |
|          | EDEM3   |    |    | 1  |
| II       | EDF1    | 2  | 2  | 1  |
|          | EDN1    |    | 2  | 3  |
| II + III | EDNRA   | 1  | 1  | 7  |
| III      | EEA1    |    | 1  | 1  |
| II       | EED     | 1  | 1  | 1  |
| II       | EEF1A2  | 2  | 3  | 4  |
| III      | EEF1B2  |    | 1  |    |
| II       | EEF1D   | 1  | 7  | 15 |
| III      | EEF1E1  |    | 2  | 4  |
| II       | EEF1G   | 3  | 3  | 8  |
| II       | EEF2    | 10 | 9  | 14 |
| III      | EEF2K   |    |    | 1  |
|          | EEFSEC  | 1  |    | 2  |
| III      | EFCAB11 |    |    |    |
| III      | EFCAB2  |    |    |    |
| III      | EFCAB7  |    |    |    |
| II       | EFEMP1  | 4  | 7  | 6  |
| III      | EFHA1   |    |    |    |
|          | EFHC1   |    |    | 1  |
| III      | EFHD1   |    | 1  | 1  |
| III      | EFHD2   |    | 1  | 6  |
| II       | EFNA1   | 3  | 4  | 2  |
| III      | EFNA3   |    |    | 1  |
|          | EFNA4   |    | 2  | 4  |
|          | EFNA5   |    | 3  | 3  |
|          | EFNB1   |    | 2  | 5  |
|          | EFR3A   |    |    |    |
| III      | EFR3B   |    |    | 1  |
|          | EFTUD1  |    | 2  | 3  |
| II       | EFTUD2  | 2  | 3  | 5  |
| III      | EGFL7   |    |    |    |
| II + III | EGFR    | 5  | 16 | 22 |
| II + III | EGLN1   | 1  | 1  | 4  |
|          | EGLN3   |    |    |    |

|          |          |   |   |    |
|----------|----------|---|---|----|
|          | EHBP1    |   |   | 2  |
| III      | EHBP1L1  |   | 1 |    |
|          | EHD1     |   | 3 | 10 |
| II       | EHD2     | 6 | 1 | 12 |
| II       | EHD4     | 1 | 2 | 8  |
| II + III | EHMT1    | 1 | 7 | 6  |
| III      | EHMT2    |   | 3 | 4  |
| III      | EI24     |   | 1 | 2  |
|          | EID1     | 2 |   | 5  |
|          | EID2     |   |   | 1  |
|          | EID2B    |   |   |    |
| II       | EIF1     | 3 | 4 | 4  |
| II       | EIF1AD   | 1 | 4 | 8  |
| II       | EIF1AX   | 2 | 2 | 3  |
| III      | EIF1B    |   |   | 3  |
| II       | EIF2A    | 1 | 2 | 3  |
| II       | EIF2AK1  | 3 | 2 | 7  |
| III      | EIF2AK2  |   | 1 | 1  |
|          | EIF2AK3  |   |   | 2  |
|          | EIF2AK4  |   | 1 | 2  |
| II + III | EIF2B1   | 1 | 1 | 4  |
|          | EIF2B2   |   | 1 | 1  |
| III      | EIF2B3   |   |   |    |
| III      | EIF2B4   |   |   |    |
| III      | EIF2B5   |   |   |    |
| III      | EIF2C1   |   |   | 2  |
| II + III | EIF2C2   | 1 | 2 | 5  |
|          | EIF2C3   | 1 |   | 1  |
| III      | EIF2D    |   | 1 | 1  |
| III      | EIF2S1   |   | 2 | 2  |
| III      | EIF2S2   |   | 2 | 2  |
| II       | EIF2S3   | 3 | 4 | 13 |
| II       | EIF3A    | 1 | 4 | 8  |
| II       | EIF3B    | 4 | 2 | 2  |
| II       | EIF3D    | 1 | 1 | 1  |
| III      | EIF3E    |   |   |    |
| III      | EIF3F    |   |   |    |
| II       | EIF3G    | 1 | 1 | 2  |
| II       | EIF3H    | 1 | 4 | 3  |
| III      | EIF3I    |   | 1 | 1  |
| III      | EIF3J    |   | 1 | 6  |
| II       | EIF3K    | 2 | 1 | 1  |
| II       | EIF3L    | 1 | 1 | 2  |
| III      | EIF3M    |   |   | 2  |
| II       | EIF4A2   | 2 | 2 | 2  |
| II       | EIF4A3   | 1 | 1 | 1  |
| II       | EIF4B    | 2 | 6 | 14 |
| III      | EIF4E    |   |   | 2  |
| III      | EIF4E2   |   | 1 |    |
| III      | EIF4E3   |   |   |    |
| III      | EIF4EBP1 |   |   | 1  |

|          |           |   |   |    |
|----------|-----------|---|---|----|
| II       | EIF4EBP2  | 1 | 3 | 5  |
| III      | EIF4ENIF1 |   | 1 | 1  |
| II       | EIF4G1    | 8 | 8 | 19 |
| II       | EIF4G2    | 4 | 8 | 8  |
| III      | EIF4G3    |   |   | 6  |
| II       | EIF4H     | 1 | 7 | 6  |
| II       | EIF5      | 3 | 8 | 4  |
| II       | EIF5A     | 2 | 5 | 6  |
| II       | EIF5B     | 3 | 4 | 4  |
| II       | EIF6      | 1 | 3 | 2  |
|          | ELAC1     |   |   | 1  |
| II       | ELAC2     | 1 | 1 | 2  |
| II       | ELAVL1    | 1 | 1 | 5  |
|          | ELF1      |   | 3 | 2  |
|          | ELF2      |   | 1 | 3  |
| II + III | ELF3      | 1 | 4 | 6  |
| II       | ELF4      | 1 | 5 | 11 |
|          | ELFN2     |   | 2 | 7  |
| II       | ELK1      | 1 | 1 | 2  |
|          | ELK3      |   |   |    |
|          | ELK4      |   | 3 | 6  |
|          | ELL       |   |   | 4  |
| III      | ELL2      |   | 7 | 7  |
| III      | ELL3      |   |   |    |
|          | ELMO2     |   | 2 | 2  |
|          | ELMOD1    |   |   |    |
|          | ELMOD2    | 1 | 1 |    |
| III      | ELMOD3    |   |   | 1  |
| III      | ELOF1     |   |   |    |
| II       | ELOVL1    | 4 | 7 | 10 |
| II       | ELOVL5    | 4 | 6 | 6  |
| II + III | ELOVL6    | 1 | 1 | 5  |
|          | ELOVL7    |   |   |    |
|          | ELP2      |   | 1 |    |
| II       | ELP3      | 1 | 2 | 3  |
| III      | ELP4      |   |   |    |
| II       | EMD       | 1 | 1 | 4  |
| II + III | EME1      | 1 | 3 | 5  |
| III      | EMG1      |   | 2 | 1  |
|          | EML1      |   |   |    |
| III      | EML2      |   |   |    |
| III      | EML3      |   |   | 1  |
| II + III | EML4      | 3 | 5 | 5  |
| II       | EMP2      | 3 | 3 | 4  |
| II       | EMP3      | 4 | 2 | 4  |
| II       | ENAH      | 2 | 5 | 12 |
| III      | ENDOG     |   |   |    |
| III      | ENDOV     |   |   |    |
| II       | ENG       | 5 | 4 | 10 |
| III      | ENGASE    |   |   | 2  |
| II       | ENO1      | 8 | 6 | 14 |

|          |              |    |    |    |
|----------|--------------|----|----|----|
| III      | ENO2         |    |    |    |
| III      | ENO3         |    |    |    |
| III      | ENOPH1       |    |    | 1  |
| III      | ENOSF1       |    | 1  | 2  |
|          | ENOX1        |    |    |    |
|          | ENOX2        |    |    |    |
|          | ENPP1        |    |    |    |
| III      | ENSA         |    | 1  | 2  |
|          | ENTPD4       |    | 2  | 8  |
| III      | ENTPD5       |    |    |    |
| II       | ENTPD6       | 2  | 7  | 8  |
|          | ENTPD7       | 1  | 2  |    |
| III      | ENY2         |    |    |    |
| II + III | EP300        | 8  | 11 | 18 |
| II       | EP400        | 1  | 2  | 1  |
| II       | EPAS1        | 5  | 9  | 17 |
| II       | EPB41        | 1  | 2  | 6  |
| II       | EPB41L1      | 3  | 6  | 5  |
| III      | EPB41L2      |    |    |    |
| III      | EPB41L3      |    |    | 1  |
| III      | EPB41L4A     |    |    |    |
| III      | EPB41L4A-AS1 | 1  |    |    |
|          | EPB41L4B     |    |    |    |
|          | EPB41L5      |    |    | 1  |
| III      | EPB49        | 2  |    | 2  |
| II + III | EPC1         | 1  | 2  | 7  |
|          | EPC2         | 1  |    | 4  |
|          | EPDR1        |    | 2  | 3  |
|          | EPG5         |    |    | 1  |
| II + III | EPHA2        | 10 | 9  | 18 |
| II + III | EPHB2        | 2  | 1  | 5  |
| II       | EPHB4        | 3  | 5  | 8  |
| III      | EPHX1        |    |    |    |
| III      | EPHX2        |    |    |    |
|          | EPM2A        |    |    | 1  |
| II + III | EPM2AIP1     | 1  | 2  | 7  |
| II       | EPN1         | 2  | 4  | 7  |
| II + III | EPN2         | 1  | 3  | 7  |
| II + III | EPOR         | 3  | 3  | 6  |
| II + III | EPPK1        | 10 | 14 | 16 |
|          | EPRS         | 1  |    | 2  |
|          | EPS15        |    |    | 1  |
| III      | EPS15L1      |    | 1  | 2  |
|          | EPS8         |    |    |    |
| III      | EPS8L1       |    |    |    |
| III      | EPS8L2       | 1  |    |    |
| II       | EPT1         | 2  | 5  | 9  |
| III      | ERAL1        | 1  |    | 4  |
|          | ERAP1        |    |    | 6  |
|          | ERBB2        |    |    | 1  |
| II + III | ERBB2IP      | 3  | 6  | 8  |

|          |         |   |    |    |
|----------|---------|---|----|----|
| II + III | ERC1    | 3 | 12 | 28 |
| III      | ERCC1   |   |    | 1  |
| III      | ERCC2   |   |    |    |
|          | ERCC3   |   |    | 2  |
| II + III | ERCC4   | 1 | 2  | 11 |
|          | ERCC6   |   |    | 3  |
|          | ERCC6L  |   |    | 2  |
| II + III | ERCC6L2 | 1 | 2  | 3  |
| II + III | ERCC8   | 1 | 2  | 8  |
| II       | ERF     | 2 | 8  | 12 |
| II       | ERGIC1  | 2 | 3  | 7  |
| III      | ERGIC2  |   | 1  | 1  |
| II       | ERGIC3  | 1 | 2  | 5  |
| III      | ERH     |   | 1  | 2  |
|          | ERI1    |   |    | 1  |
|          | ERI2    |   |    |    |
| III      | ERI3    |   |    | 1  |
| III      | ERICH1  | 1 |    | 1  |
| III      | ERLEC1  | 1 |    | 1  |
|          | ERLIN1  |   |    | 5  |
|          | ERLIN2  |   | 3  | 2  |
|          | ERMP1   |   | 4  | 3  |
| III      | ERO1L   |   |    | 3  |
|          | ERO1LB  |   |    | 1  |
| II       | ERP29   | 2 | 4  | 5  |
| III      | ERP44   |   | 1  | 1  |
| II + III | ERRFI1  | 1 | 3  | 6  |
| III      | ESAM    |   | 2  | 2  |
| III      | ESCO1   |   |    | 2  |
| III      | ESCO2   |   |    |    |
| III      | ESD     |   |    | 1  |
| III      | ESF1    |   |    |    |
| II       | ESPL1   | 1 | 1  | 2  |
| III      | ESRRA   |   |    |    |
| II       | ESYT1   | 3 | 5  | 4  |
| II       | ESYT2   | 1 | 5  | 3  |
|          | ETAA1   |   |    | 2  |
| II + III | ETF1    | 2 | 4  | 9  |
| III      | ETFA    |   | 1  | 4  |
| III      | ETFB    | 1 |    | 1  |
|          | ETFDH   |   |    | 1  |
| III      | ETHE1   |   |    | 3  |
|          | ETNK1   | 1 |    | 1  |
|          | ETS1    |   |    |    |
| II + III | ETS2    | 1 | 3  | 5  |
| II + III | ETV3    | 2 | 4  | 9  |
| III      | ETV4    |   |    |    |
|          | ETV5    |   |    | 3  |
|          | ETV6    |   | 2  | 5  |
| II       | EVC     | 2 | 2  | 9  |
| III      | EVI5    | 1 |    | 1  |

|          |         |   |    |    |
|----------|---------|---|----|----|
| III      | EVI5L   | 1 |    | 2  |
| III      | EVL     | 1 |    | 1  |
| III      | EVPL    |   |    | 2  |
| III      | EWSR1   |   | 3  | 1  |
|          | EXD2    |   | 2  | 2  |
|          | EXO1    |   |    | 1  |
|          | EXOC1   |   | 1  | 1  |
|          | EXOC2   | 2 |    | 1  |
|          | EXOC3   | 1 |    | 5  |
|          | EXOC4   | 1 |    |    |
| II       | EXOC5   | 2 | 1  | 1  |
| III      | EXOC6   |   |    | 2  |
|          | EXOC6B  |   |    |    |
| II       | EXOC7   | 3 | 3  | 10 |
|          | EXOC8   |   | 1  | 3  |
|          | EXOG    |   |    | 1  |
| III      | EXOSC1  |   |    | 2  |
| III      | EXOSC10 |   | 1  |    |
| II       | EXOSC2  | 3 | 3  | 11 |
| III      | EXOSC3  |   |    | 1  |
|          | EXOSC4  | 1 |    | 2  |
| III      | EXOSC5  |   |    |    |
|          | EXOSC6  | 2 |    | 9  |
| III      | EXOSC7  |   |    |    |
| III      | EXOSC8  |   |    |    |
| III      | EXOSC9  |   |    |    |
| II + III | EXT1    | 3 | 6  | 11 |
| II + III | EXT2    | 1 | 2  | 5  |
|          | EXTL2   |   | 1  | 4  |
| II + III | EXTL3   | 7 | 20 | 23 |
| III      | EYA3    |   | 2  | 3  |
| II + III | EYA4    | 1 | 4  | 7  |
| III      | EZH1    |   |    | 1  |
| III      | EZH2    |   |    | 1  |
| II       | EZR     | 1 | 2  | 2  |
| III      | F11R    |   | 1  | 2  |
| III      | F12     |   |    |    |
| II + III | F2R     | 1 | 5  | 8  |
|          | F3      |   |    |    |
| III      | F8      |   |    | 1  |
| III      | FABP3   |   |    |    |
| II + III | FADD    | 6 | 5  | 11 |
| II       | FADS1   | 2 | 7  | 6  |
| III      | FADS2   |   |    | 4  |
| III      | FADS3   |   | 1  | 1  |
| III      | FAF1    |   | 1  | 1  |
| II + III | FAF2    | 1 | 7  | 14 |
| III      | FAH     |   |    |    |
|          | FAHD1   |   | 1  | 2  |
| III      | FAHD2A  |   |    |    |
| III      | FAHD2B  |   |    |    |



|          |          |    |   |    |
|----------|----------|----|---|----|
| III      | FAM      |    |   |    |
|          | FAM100A  |    | 4 | 7  |
| II       | FAM100B  | 3  | 4 | 5  |
| III      | FAM101B  |    |   | 3  |
| III      | FAM102A  |    | 1 | 5  |
|          | FAM102B  |    |   | 2  |
| III      | FAM103A1 |    |   | 1  |
| II + III | FAM104A  | 1  | 5 | 8  |
| II       | FAM104B  | 1  | 1 | 1  |
|          | FAM105A  |    | 1 | 1  |
| II + III | FAM105B  | 1  | 1 | 8  |
| II + III | FAM107B  | 1  | 1 | 1  |
| II + III | FAM108B1 | 1  | 1 | 10 |
| II + III | FAM108C1 | 4  | 2 | 6  |
|          | FAM109A  |    | 1 | 4  |
|          | FAM109B  |    |   | 5  |
|          | FAM110A  |    |   | 2  |
|          | FAM110B  |    |   | 5  |
| II + III | FAM110C  | 1  | 1 | 3  |
|          | FAM111B  | 2  |   | 1  |
| II       | FAM114A1 | 1  | 2 | 3  |
| III      | FAM114A2 |    |   |    |
|          | FAM115A  |    |   | 2  |
|          | FAM116A  |    | 1 | 1  |
| III      | FAM117A  |    |   |    |
| II + III | FAM117B  | 2  | 1 | 7  |
| II + III | FAM118A  | 1  | 2 | 4  |
| III      | FAM118B  |    |   |    |
| II       | FAM120A  | 3  | 1 | 13 |
|          | FAM120B  |    | 2 | 3  |
| II       | FAM120C  | 1  | 2 | 3  |
|          | FAM122A  |    | 1 | 3  |
| III      | FAM122B  |    | 3 | 5  |
| III      | FAM125A  |    |   |    |
|          | FAM126A  |    | 1 | 1  |
| II       | FAM127A  | 2  | 6 | 7  |
| II       | FAM127B  | 1  | 3 | 7  |
| II + III | FAM127C  | 1  | 1 | 10 |
|          | FAM129A  | 1  |   | 3  |
| II       | FAM129B  | 11 | 8 | 22 |
| II       | FAM131A  | 1  | 1 | 2  |
| II       | FAM134A  | 2  | 4 | 6  |
| II + III | FAM134B  | 1  | 3 | 3  |
|          | FAM134C  |    | 1 | 6  |
|          | FAM135A  |    | 2 | 2  |
| III      | FAM136A  |    | 1 | 2  |
|          | FAM13A   |    | 1 | 2  |
| III      | FAM149B1 |    |   |    |
|          | FAM160A1 |    | 1 | 3  |
| II + III | FAM160A2 | 1  | 3 | 10 |
|          | FAM160B1 |    | 1 | 5  |

|          |          |   |    |    |
|----------|----------|---|----|----|
| II       | FAM160B2 | 2 | 2  | 3  |
| III      | FAM161A  |   |    | 1  |
| III      | FAM162A  |   |    |    |
| III      | FAM165B  |   |    |    |
|          | FAM168A  |   | 1  | 2  |
| III      | FAM168B  |   | 3  | 8  |
|          | FAM169A  |   |    | 3  |
| III      | FAM172A  |   | 1  | 1  |
| III      | FAM173A  |   |    | 1  |
|          | FAM173B  |   |    |    |
| II       | FAM174A  | 1 | 1  | 1  |
| III      | FAM175A  |   |    |    |
| II + III | FAM175B  | 2 | 3  | 6  |
| II       | FAM176C  | 1 | 1  | 4  |
| III      | FAM177A1 |   | 2  | 2  |
|          | FAM178A  |   |    | 3  |
| III      | FAM179A  |   |    | 1  |
| III      | FAM188A  |   |    | 1  |
|          | FAM189A2 |   | 1  |    |
| II       | FAM189B  | 1 | 5  | 4  |
| III      | FAM18B1  |   |    |    |
|          | FAM190B  |   |    | 2  |
| III      | FAM192A  |   | 4  | 4  |
|          | FAM193A  |   |    | 1  |
|          | FAM193B  |   | 1  | 3  |
| III      | FAM195A  |   | 1  |    |
| III      | FAM195B  |   | 1  |    |
|          | FAM199X  |   |    | 1  |
| II + III | FAM200A  | 2 | 3  | 5  |
| III      | FAM204A  |   |    |    |
| III      | FAM206A  | 1 |    | 1  |
| III      | FAM207A  |   | 1  | 3  |
| II + III | FAM208A  | 2 | 2  | 6  |
| II + III | FAM208B  | 8 | 12 | 22 |
| II + III | FAM20B   | 4 | 4  | 12 |
| II + III | FAM20C   | 3 | 4  | 12 |
|          | FAM210A  |   |    | 2  |
| III      | FAM210B  |   |    | 1  |
|          | FAM213A  |   |    |    |
| III      | FAM213B  |   | 1  | 1  |
| II + III | FAM214A  | 1 | 1  | 3  |
| III      | FAM214B  |   | 1  | 1  |
| III      | FAM216A  |   |    |    |
| II + III | FAM217B  | 1 | 4  | 7  |
| III      | FAM219A  |   |    | 3  |
| III      | FAM219B  |   |    |    |
|          | FAM21C   |   |    |    |
|          | FAM220A  | 1 |    | 3  |
| III      | FAM24B   |   |    | 1  |
| II       | FAM32A   | 3 | 1  | 6  |
|          | FAM35A   |   | 1  | 2  |

|          |         |    |    |    |
|----------|---------|----|----|----|
| III      | FAM3A   |    | 1  | 2  |
| III      | FAM3C   |    |    | 1  |
|          | FAM40A  |    |    |    |
|          | FAM40B  |    |    | 2  |
| II       | FAM43A  | 1  | 2  | 6  |
| II + III | FAM46A  | 2  | 3  | 7  |
| II + III | FAM46B  | 2  | 3  | 7  |
| II + III | FAM46C  | 1  | 1  | 3  |
| III      | FAM48A  |    | 3  | 5  |
| III      | FAM49B  |    | 1  | 5  |
| III      | FAM50A  |    |    |    |
|          | FAM50B  |    |    |    |
|          | FAM53A  |    |    |    |
| II       | FAM53B  | 1  | 4  | 14 |
| II       | FAM53C  | 4  | 10 | 16 |
| III      | FAM54A  |    |    | 2  |
|          | FAM54B  |    |    | 3  |
| II + III | FAM57A  | 2  | 4  | 4  |
|          | FAM58A  |    |    |    |
| III      | FAM60A  |    |    | 4  |
|          | FAM63A  |    |    | 2  |
|          | FAM63B  |    |    | 2  |
| III      | FAM64A  |    |    | 1  |
| II       | FAM65A  | 3  | 3  | 5  |
|          | FAM69A  |    |    | 2  |
| III      | FAM72B  |    | 4  | 7  |
| III      | FAM72D  |    | 3  | 7  |
| II       | FAM73A  | 1  | 1  | 1  |
| III      | FAM73B  |    |    | 1  |
| III      | FAM76A  |    |    | 3  |
| III      | FAM76B  |    | 1  |    |
| II + III | FAM78A  | 1  | 2  | 7  |
|          | FAM81A  |    |    | 1  |
| II       | FAM82A2 | 1  | 1  | 1  |
| III      | FAM82B  |    |    |    |
| II + III | FAM83D  | 6  | 4  | 8  |
| II + III | FAM83G  | 3  | 5  | 9  |
| II       | FAM83H  | 10 | 11 | 24 |
|          | FAM89A  |    |    | 2  |
| II       | FAM89B  | 3  | 2  | 6  |
| II       | FAM8A1  | 1  | 1  | 1  |
|          | FAM91A1 |    |    | 1  |
| III      | FAM92A1 |    |    |    |
| III      | FAM96A  |    |    |    |
| II       | FAM96B  | 2  | 1  | 1  |
| III      | FAM98A  |    | 2  | 2  |
| III      | FAM98B  |    |    |    |
| III      | FAM98C  |    |    |    |
|          | FAN1    |    | 1  | 4  |
| III      | FANCA   |    | 1  | 2  |
|          | FANCB   |    |    | 3  |

|          |         |    |    |    |
|----------|---------|----|----|----|
| II       | FANCC   | 1  | 1  | 7  |
| II       | FANCD2  | 1  | 1  | 4  |
| III      | FANCE   |    |    | 2  |
| III      | FANCG   |    | 1  | 1  |
|          | FANCI   |    |    | 1  |
|          | FANCL   | 1  |    |    |
| II + III | FANCM   | 1  | 2  | 3  |
| II       | FAR1    | 1  | 1  | 2  |
| III      | FARP1   |    |    | 1  |
|          | FARP2   |    | 2  | 3  |
| II + III | FARS2   | 1  | 3  | 1  |
| III      | FARSA   |    | 1  | 2  |
| III      | FARSB   |    |    |    |
| III      | FAS     |    |    |    |
| II       | FASN    | 14 | 7  | 13 |
| III      | FASTK   |    |    | 2  |
|          | FASTKD1 |    |    |    |
|          | FASTKD2 |    |    |    |
|          | FASTKD3 | 1  |    | 3  |
| II + III | FAT1    | 5  | 12 | 18 |
| III      | FAU     | 1  |    | 1  |
| III      | FBF1    |    |    |    |
| III      | FBL     | 1  | 1  |    |
|          | FBLIM1  |    |    |    |
| II       | FBLN1   | 3  | 1  | 4  |
|          | FBLN2   | 1  |    |    |
| II       | FBLN5   | 2  | 1  | 2  |
|          | FBN2    | 1  |    | 3  |
| II       | FBR5    | 1  | 5  | 8  |
| II       | FBRSL1  | 3  | 6  | 16 |
|          | FBXL12  |    |    | 1  |
| II + III | FBXL14  | 5  | 6  | 23 |
|          | FBXL15  |    |    |    |
| III      | FBXL16  |    |    | 2  |
| II + III | FBXL17  | 1  | 1  | 2  |
| II       | FBXL18  | 6  | 11 | 29 |
| II       | FBXL19  | 2  | 5  | 10 |
|          | FBXL2   |    |    | 1  |
| III      | FBXL20  | 1  |    | 1  |
|          | FBXL3   |    | 1  | 1  |
| II + III | FBXL4   | 1  | 1  | 6  |
|          | FBXL5   |    |    | 2  |
| III      | FBXL6   |    |    |    |
|          | FBXO10  |    |    | 3  |
|          | FBXO11  |    | 1  | 3  |
|          | FBXO17  |    | 2  | 3  |
|          | FBXO18  |    |    | 1  |
| III      | FBXO2   |    |    |    |
|          | FBXO21  |    |    | 2  |
| III      | FBXO22  |    |    |    |
|          | FBXO28  |    | 3  | 7  |

|          |          |   |    |    |
|----------|----------|---|----|----|
|          | FBXO3    |   |    | 1  |
|          | FBXO30   |   | 2  | 4  |
| II + III | FBXO31   | 4 | 3  | 9  |
|          | FBXO33   |   |    | 2  |
| II + III | FBXO34   | 2 | 4  | 10 |
|          | FBXO38   |   |    |    |
|          | FBXO4    |   |    |    |
| II       | FBXO41   | 2 | 2  | 4  |
| II + III | FBXO42   | 4 | 5  | 9  |
| III      | FBXO44   |   |    |    |
| II + III | FBXO45   | 1 | 1  | 3  |
| II + III | FBXO46   | 3 | 2  | 10 |
|          | FBXO5    |   |    | 5  |
| III      | FBXO7    |   | 1  | 5  |
|          | FBXO8    |   |    |    |
| III      | FBXO9    |   |    |    |
|          | FBXW11   |   | 1  | 4  |
| II + III | FBXW2    | 8 | 15 | 16 |
| III      | FBXW4    |   |    |    |
| II       | FBXW5    | 5 | 6  | 13 |
|          | FBXW7    |   | 1  | 2  |
| III      | FBXW8    |   | 2  | 7  |
| III      | FBXW9    |   |    |    |
| III      | FCF1     |   |    | 2  |
| III      | FCHO1    |   |    |    |
| III      | FCHO2    | 1 |    | 2  |
| III      | FCHSD1   |   |    |    |
|          | FCHSD2   |   |    |    |
| II       | FDFT1    | 2 | 2  | 3  |
| III      | FDPS     |   | 1  |    |
| III      | FDX1     |   | 1  |    |
| III      | FDX1L    |   | 1  | 1  |
|          | FDXACB1  |   | 1  |    |
| III      | FDXR     |   | 1  | 2  |
|          | FECH     |   |    |    |
| II + III | FEM1A    | 5 | 11 | 13 |
| II + III | FEM1B    | 4 | 11 | 11 |
|          | FEM1C    |   | 2  | 10 |
| II + III | FEN1     | 5 | 1  | 8  |
| III      | FER      |   |    |    |
| II       | FERMT1   | 1 | 1  | 3  |
| II       | FERMT2   | 1 | 1  | 3  |
| III      | FEZ2     | 1 |    |    |
| III      | FGD1     |   |    | 1  |
|          | FGD4     |   |    |    |
| II + III | FGD5-AS1 | 4 | 5  | 11 |
|          | FGF2     |   |    |    |
|          | FGFBP1   |   |    |    |
| III      | FGFR1    |   | 2  | 1  |
| III      | FGFR1OP  |   |    | 1  |
| III      | FGFR1OP2 |   |    | 1  |

|          |            |    |    |    |
|----------|------------|----|----|----|
| II       | FGFR3      | 1  | 2  | 3  |
| III      | FGFR4      |    | 1  |    |
| III      | FGFRL1     |    | 6  | 7  |
| III      | FH         |    |    |    |
|          | FHDC1      |    |    | 1  |
| III      | FHL1       |    |    |    |
| III      | FHL2       |    |    | 1  |
| III      | FHL3       |    |    | 4  |
| III      | FHOD1      |    |    | 2  |
| III      | FIBCD1     |    | 2  | 5  |
| III      | FIBP       | 1  |    | 1  |
|          | FIG4       |    |    |    |
| II + III | FIGN       | 1  | 1  | 7  |
| II + III | FIGNL1     | 2  | 7  | 14 |
| III      | FIP1L1     |    |    |    |
| III      | FIS1       |    |    | 1  |
| II + III | FITM2      | 1  | 4  | 7  |
| II       | FIZ1       | 3  | 5  | 7  |
| II + III | FJX1       | 8  | 7  | 14 |
| II       | FKBP10     | 6  | 12 | 15 |
|          | FKBP14     |    | 1  | 2  |
| II       | FKBP15     | 1  | 2  | 8  |
| III      | FKBP1A     |    |    |    |
| III      | FKBP2      |    |    |    |
| III      | FKBP3      |    | 1  |    |
| II       | FKBP4      | 4  | 6  | 3  |
| III      | FKBP5      |    |    |    |
| III      | FKBP7      |    |    |    |
| III      | FKBP8      |    | 3  | 2  |
| II       | FKBP9      | 1  | 6  | 5  |
| II + III | FKBPL      | 3  | 3  | 7  |
|          | FKTN       |    |    |    |
| II       | FLAD1      | 2  | 5  | 8  |
| II + III | FLCN       | 1  | 2  | 7  |
| III      | FLII       |    | 1  | 1  |
|          | FLJ27352   |    | 1  | 1  |
| III      | FLJ31306   |    |    | 3  |
|          | FLJ35776   |    |    |    |
|          | FLJ37453   |    |    | 2  |
|          | FLJ39051   |    |    |    |
| III      | FLJ46906   |    |    |    |
| II       | FLNA       | 15 | 17 | 22 |
| II       | FLNB       | 5  | 2  | 2  |
| II       | FLOT1      | 2  | 3  | 5  |
| III      | FLOT2      |    | 1  | 4  |
| II       | FLVCR1     | 3  | 1  | 4  |
|          | FLVCR1-AS1 |    |    |    |
|          | FLVCR2     |    |    | 1  |
| III      | FLYWCH1    | 1  |    | 1  |
| III      | FLYWCH2    |    |    |    |
| III      | FMNL1      |    | 1  | 1  |

|          |          |    |    |    |
|----------|----------|----|----|----|
|          | FMNL2    |    | 1  | 2  |
| III      | FMNL3    |    | 1  | 2  |
| III      | FMR1     |    |    | 3  |
| II       | FN1      | 2  | 2  | 2  |
| III      | FN3K     |    |    |    |
|          | FN3KRP   |    | 1  | 5  |
| III      | FNBP1    | 1  |    | 4  |
| III      | FNBP1L   |    |    |    |
| III      | FNBP4    |    | 1  | 4  |
|          | FNDC3A   |    | 4  | 6  |
|          | FNDC3B   |    | 1  | 4  |
| II + III | FNIP1    | 1  | 1  | 7  |
|          | FNIP2    |    |    | 1  |
| III      | FNTA     |    | 2  | 2  |
|          | FOCAD    |    |    |    |
| III      | FOLR1    |    | 1  |    |
| III      | FOPNL    |    |    | 1  |
| II + III | FOS      | 2  | 1  | 2  |
| III      | FOSL1    |    | 1  | 3  |
| II + III | FOSL2    | 7  | 10 | 11 |
| II + III | FOXC1    | 3  | 9  | 16 |
| II + III | FOXC2    | 2  | 2  | 9  |
| II + III | FOXD1    | 1  | 1  | 8  |
| II + III | FOXF1    | 1  | 2  | 7  |
| II + III | FOXF2    | 3  | 8  | 14 |
| III      | FOXJ2    |    | 2  | 6  |
|          | FOXJ3    |    |    | 4  |
| II + III | FOXK1    | 17 | 20 | 41 |
| II + III | FOXK2    | 18 | 22 | 35 |
| II + III | FOXL2    | 4  | 7  | 14 |
| II       | FOXM1    | 8  | 12 | 22 |
|          | FOXN2    |    | 1  | 3  |
| II + III | FOXO1    | 2  | 3  | 8  |
| III      | FOXO4    |    |    | 2  |
|          | FOXP1    |    |    | 5  |
| III      | FOXP4    |    | 3  | 2  |
|          | FOXQ1    |    |    | 1  |
| II       | FOXRED1  | 1  | 7  | 6  |
| II       | FOXRED2  | 3  | 7  | 16 |
| III      | FPGS     |    |    | 2  |
| III      | FRA10AC1 |    |    |    |
| II + III | FRAT2    | 1  | 3  | 6  |
| III      | FRG1     |    |    |    |
| III      | FRG1B    |    |    |    |
|          | FRMD6    |    |    | 1  |
| II + III | FRS2     | 3  | 3  | 9  |
|          | FRY      |    |    |    |
| II + III | FRYL     | 1  | 1  | 6  |
| II       | FSCN1    | 3  | 10 | 8  |
| III      | FSD1     |    |    |    |
|          | FST      |    | 1  |    |

|          |           |    |    |    |
|----------|-----------|----|----|----|
| II       | FSTL1     | 10 | 11 | 11 |
| II       | FSTL3     | 2  | 3  | 11 |
| II       | FTH1      | 1  | 6  | 8  |
| II       | FTL       | 4  | 3  | 12 |
|          | FTO       |    | 4  | 10 |
| III      | FTSJ1     |    | 1  | 3  |
| II + III | FTSJ2     | 2  | 4  | 8  |
| III      | FTSJ3     |    |    | 1  |
|          | FTSJD1    |    | 4  | 5  |
| II       | FTSJD2    | 1  | 2  | 1  |
| II       | FUBP1     | 1  | 3  | 3  |
| II       | FUBP3     | 1  | 3  | 4  |
|          | FUCA1     |    |    |    |
| II       | FUCA2     | 2  | 2  | 2  |
| III      | FUK       |    |    | 1  |
| III      | FUNDC1    |    |    | 1  |
| III      | FUNDC2    |    |    | 3  |
| II       | FURIN     | 5  | 8  | 12 |
| II       | FUS       | 3  | 1  | 2  |
|          | FUT10     |    | 2  | 1  |
|          | FUT11     |    |    | 1  |
|          | FUT8      |    | 1  | 1  |
|          | FXC1      |    | 1  | 2  |
| III      | FXN       |    | 1  | 3  |
| III      | FXR1      |    | 3  | 1  |
| II       | FXR2      | 1  | 5  | 4  |
| II       | FXYD5     | 1  | 3  | 1  |
|          | FYCO1     | 2  |    | 3  |
| II       | FYN       | 2  | 1  | 4  |
| III      | FYTTD1    |    | 1  | 2  |
| II + III | FZD2      | 10 | 12 | 22 |
| II + III | FZD6      | 1  | 2  | 6  |
| II + III | FZD8      | 3  | 3  | 11 |
|          | FZD9      |    | 3  | 4  |
| II + III | FZR1      | 2  | 5  | 11 |
|          | G2E3      |    | 1  | 1  |
| II       | G3BP1     | 2  | 7  | 5  |
|          | G3BP2     |    | 2  | 9  |
| III      | G6PC3     |    | 2  | 4  |
| II       | G6PD      | 3  | 3  | 3  |
| III      | GAA       |    | 1  | 2  |
|          | GAB1      |    |    | 1  |
| II       | GABARAP   | 1  | 1  | 4  |
| II       | GABARAPL1 | 1  | 1  | 1  |
| III      | GABARAPL2 |    |    | 1  |
|          | GABPA     |    | 1  | 1  |
| III      | GABPB1    |    | 1  | 1  |
| III      | GABPB2    |    |    |    |
| III      | GABRA3    |    |    |    |
| III      | GABRE     |    |    | 5  |
|          | GABRQ     | 1  |    | 1  |



|          |            |    |    |    |
|----------|------------|----|----|----|
| III      | GAD1       |    |    |    |
| III      | GADD45A    |    | 2  | 1  |
|          | GADD45B    |    | 2  | 3  |
| III      | GADD45GIP1 | 1  |    |    |
| III      | GAK        | 1  |    | 4  |
| III      | GAL        |    | 1  | 3  |
| III      | GALE       | 2  |    | 1  |
| III      | GALK1      |    | 1  |    |
|          | GALK2      |    | 1  | 4  |
| III      | GALM       |    | 2  | 1  |
| II       | GALNS      | 5  | 16 | 11 |
|          | GALNT1     |    |    | 2  |
| II + III | GALNT10    | 1  | 6  | 4  |
|          | GALNT11    |    |    | 1  |
| II + III | GALNT2     | 9  | 10 | 19 |
|          | GALNT7     |    |    | 1  |
| III      | GALT       |    |    |    |
| III      | GAMT       |    |    |    |
|          | GAN        |    |    | 2  |
| II       | GANAB      | 7  | 9  | 11 |
|          | GANC       |    |    | 2  |
| II       | GAPDH      | 8  | 7  | 7  |
|          | GAPVD1     | 1  |    | 5  |
| III      | GAR1       |    |    | 1  |
| II       | GARS       | 1  | 2  | 3  |
|          | GART       | 1  |    | 2  |
| II + III | GAS1       | 13 | 20 | 21 |
| II       | GAS2L1     | 3  | 3  | 13 |
| II       | GAS2L3     | 2  | 4  | 9  |
| III      | GAS5       |    |    | 1  |
| III      | GAS6       |    |    |    |
| II       | GAS8       | 1  | 2  | 3  |
| II       | GATA2      | 10 | 13 | 17 |
|          | GATA6      |    |    |    |
| II       | GATAD1     | 1  | 4  | 4  |
| II       | GATAD2A    | 4  | 6  | 22 |
| II       | GATAD2B    | 1  | 9  | 12 |
|          | GATC       |    | 2  | 6  |
| III      | GATSL1     |    |    |    |
| II       | GBA        | 2  | 2  | 3  |
|          | GBA2       |    | 3  | 8  |
| II       | GBAP1      | 1  | 3  | 4  |
| III      | GBAS       |    |    | 1  |
|          | GBE1       | 1  |    |    |
| III      | GBF1       |    | 1  | 4  |
| III      | GCAT       |    |    |    |
| II + III | GCC1       | 1  | 6  | 9  |
| III      | GCC2       |    |    |    |
|          | GCDH       |    | 1  | 1  |
| III      | GCFC1      |    | 1  | 1  |
| III      | GCFC2      |    |    |    |

|          |        |    |    |    |
|----------|--------|----|----|----|
| III      | GCH1   |    |    |    |
| III      | GCHFR  |    |    |    |
|          | GCLC   |    |    | 1  |
| III      | GCLM   |    | 1  | 1  |
| II       | GCN1L1 | 3  | 3  | 5  |
|          | GCNT2  |    | 2  | 4  |
| III      | GCSH   |    |    |    |
| II       | GDA    | 4  | 4  | 10 |
| III      | GDAP1  |    |    |    |
| II       | GDAP2  | 1  | 1  | 2  |
| II       | GDE1   | 3  | 3  | 4  |
| II + III | GDF11  | 2  | 2  | 8  |
| II       | GDF15  | 5  | 3  | 5  |
| II       | GDI1   | 2  | 2  | 6  |
| III      | GDI2   |    | 1  | 6  |
| III      | GDPD1  |    |    |    |
| III      | GDPD5  |    |    |    |
| III      | GEM    |    | 1  | 1  |
| III      | GEMIN2 |    |    |    |
| II + III | GEMIN4 | 10 | 10 | 21 |
| II + III | GEMIN5 | 1  | 3  | 2  |
|          | GEMIN6 |    |    | 1  |
|          | GEMIN7 |    |    | 1  |
|          | GEMIN8 |    |    |    |
|          | GEN1   |    | 2  | 4  |
| II       | GET4   | 1  | 5  | 4  |
| III      | GFER   |    |    | 4  |
|          | GFM1   |    |    | 1  |
|          | GFM2   |    |    |    |
| II + III | GFOD1  | 1  | 1  | 6  |
|          | GFOD2  | 3  |    | 2  |
|          | GFPT1  |    |    |    |
| III      | GGA1   |    | 2  | 5  |
|          | GGA2   |    |    | 4  |
| II + III | GGA3   | 2  | 5  | 17 |
| III      | GGCT   |    |    |    |
| III      | GGCX   |    | 1  | 1  |
| III      | GGH    |    |    |    |
| III      | GGNBP2 |    |    |    |
| III      | GGPS1  |    |    | 1  |
| III      | GGT1   |    |    |    |
| III      | GGT7   |    |    |    |
| III      | GHDC   |    |    | 1  |
| III      | GHITM  |    |    |    |
| III      | GIGYF1 |    |    | 7  |
| II       | GIGYF2 | 1  | 3  | 11 |
|          | GIN1   |    |    | 1  |
| III      | GINS1  |    |    | 1  |
| III      | GINS2  |    | 1  | 2  |
|          | GINS3  |    | 1  | 7  |
| III      | GINS4  |    |    | 1  |

|          |         |    |    |    |
|----------|---------|----|----|----|
| III      | GIPC1   |    | 2  |    |
| III      | GIT1    |    | 1  | 5  |
|          | GIT2    |    | 1  | 1  |
| II + III | GJC1    | 2  | 7  | 12 |
|          | GK5     |    |    |    |
| III      | GKAP1   |    |    |    |
| II       | GLA     | 1  | 1  | 2  |
|          | GLB1    |    | 3  | 4  |
|          | GLB1L   |    |    |    |
| II       | GLB1L2  | 1  | 1  | 1  |
| II + III | GLCCI1  | 3  | 2  | 6  |
|          | GLCE    | 2  |    | 5  |
| III      | GLE1    |    | 2  | 2  |
| II       | GLG1    | 4  | 11 | 12 |
|          | GLI3    |    | 2  | 7  |
| III      | GLIPR2  |    |    |    |
| II       | GLIS2   | 1  | 2  | 13 |
| III      | GLMN    |    |    |    |
| III      | GLO1    |    | 2  | 1  |
| III      | GLOD4   |    | 1  |    |
|          | GLP2R   |    | 2  | 1  |
| III      | GLRX    |    |    |    |
| III      | GLRX2   |    |    |    |
| III      | GLRX3   |    |    |    |
| II       | GLRX5   | 1  | 1  | 1  |
|          | GLS     |    | 1  | 4  |
| II       | GLT25D1 | 12 | 17 | 11 |
| II + III | GLT8D1  | 1  | 2  | 1  |
|          | GLTP    |    |    |    |
|          | GLTPD1  |    | 2  | 7  |
| III      | GLTSCR2 |    | 1  |    |
| III      | GLUD1   | 1  |    | 1  |
| III      | GLUL    | 1  |    | 3  |
|          | GLYCTK  |    |    |    |
|          | GLYR1   |    | 1  | 5  |
| III      | GM2A    |    | 1  | 4  |
|          | GMCL1   |    |    | 1  |
| III      | GMDS    |    |    |    |
|          | GMEB1   | 1  |    | 3  |
| II       | GMEB2   | 2  | 1  | 9  |
| III      | GMFB    |    |    | 3  |
| III      | GMIP    |    |    | 2  |
| III      | GMNN    |    |    | 1  |
| III      | GMPPA   |    |    |    |
|          | GMPPB   |    | 2  | 5  |
| III      | GMPR2   | 1  |    |    |
| III      | GMPS    |    | 1  |    |
|          | GNA11   |    | 1  | 1  |
| II + III | GNA12   | 9  | 12 | 16 |
| II + III | GNA13   | 2  | 2  | 6  |
|          | GNAI1   |    |    |    |

|          |          |   |    |    |
|----------|----------|---|----|----|
| III      | GNAI2    |   |    | 4  |
|          | GNAI3    |   | 1  | 3  |
|          | GNAL     |   |    | 3  |
|          | GNAQ     |   |    | 1  |
| II       | GNAS     | 2 | 9  | 17 |
| III      | GNAS-AS1 |   |    |    |
| II       | GNB1     | 3 | 11 | 10 |
| II       | GNB2     | 1 | 2  | 4  |
| II       | GNB2L1   | 1 | 2  | 6  |
|          | GNB4     |   |    |    |
| III      | GNB5     |   |    | 3  |
|          | GNE      |   | 1  | 3  |
| III      | GNG11    |   |    |    |
| II       | GNG12    | 1 | 4  | 3  |
| III      | GNG5     |   | 1  |    |
| III      | GNL1     | 1 |    | 2  |
| III      | GNL2     |   |    |    |
| III      | GNL3     |   | 2  | 3  |
| II       | GNL3L    | 4 | 8  | 16 |
|          | GNPAT    | 1 | 1  |    |
| III      | GNPDA1   | 1 |    | 1  |
| III      | GNPDA2   |   |    | 1  |
| II       | GNPNAT1  | 2 | 3  | 4  |
|          | GNPTAB   |   |    | 3  |
| III      | GNPTG    |   |    |    |
| II       | GNS      | 2 | 2  | 4  |
| III      | GOLGA1   |   | 1  | 1  |
| III      | GOLGA2   | 1 |    | 2  |
|          | GOLGA3   |   | 5  | 7  |
| III      | GOLGA4   |   | 3  | 1  |
|          | GOLGA5   |   | 1  | 3  |
| III      | GOLGA7   |   | 2  | 3  |
| III      | GOLGB1   |   |    | 5  |
| III      | GOLIM4   |   | 1  |    |
| II       | GOLM1    | 1 | 1  | 1  |
| II + III | GOLPH3   | 2 | 3  | 9  |
|          | GOLPH3L  |   |    | 1  |
| III      | GOLT1B   |   |    | 1  |
| II       | GON4L    | 1 | 2  | 10 |
|          | GOPC     | 1 |    | 1  |
| III      | GORAB    |   |    |    |
| II       | GORASP1  | 3 | 1  | 10 |
|          | GORASP2  |   | 2  | 5  |
| II + III | GOSR1    | 1 | 3  | 5  |
| II       | GOSR2    | 2 | 1  | 4  |
| II       | GOT1     | 2 | 1  | 3  |
| II       | GOT2     | 5 | 8  | 16 |
| II       | GPAA1    | 1 | 1  | 2  |
|          | GPAM     |   |    | 1  |
|          | GPANK1   |   | 1  | 2  |
| III      | GPATCH1  |   |    |    |

|          |         |    |    |    |
|----------|---------|----|----|----|
| II + III | GPATCH2 | 1  | 2  | 4  |
| III      | GPATCH3 |    |    | 3  |
| III      | GPATCH4 |    |    | 1  |
| II       | GPATCH8 | 5  | 8  | 21 |
| II + III | GPBP1   | 1  | 4  | 5  |
| III      | GPBP1L1 |    |    | 1  |
| II       | GPC1    | 1  | 1  | 4  |
| III      | GPD1L   | 1  |    | 1  |
|          | GPD2    |    |    | 4  |
| II + III | GPER    | 3  | 5  | 13 |
| III      | GPHN    | 1  |    | 1  |
| II       | GPI     | 3  | 6  | 7  |
| III      | GPKOW   |    |    | 1  |
| III      | GPN1    |    |    | 1  |
| III      | GPN2    | 1  | 1  |    |
| III      | GPN3    |    |    |    |
|          | GPNMB   |    | 1  | 3  |
| II       | GPR107  | 3  | 7  | 9  |
| II       | GPR108  | 2  | 1  | 1  |
|          | GPR124  |    | 2  | 2  |
| II + III | GPR125  | 5  | 4  | 7  |
|          | GPR126  |    | 1  | 1  |
| III      | GPR137  |    |    |    |
|          | GPR157  |    |    | 1  |
| II + III | GPR161  | 3  | 3  | 14 |
| II + III | GPR176  | 1  | 4  | 3  |
|          | GPR180  |    |    | 1  |
| II + III | GPR37   | 1  | 3  | 9  |
| II       | GPR56   | 18 | 23 | 30 |
|          | GPR89A  |    |    | 1  |
| II + III | GPRC5A  | 11 | 21 | 25 |
|          | GPRC5C  |    |    |    |
|          | GPRIN1  |    |    | 2  |
| II       | GPS1    | 1  | 1  | 2  |
| III      | GPS2    |    | 1  | 1  |
| III      | GPSM1   |    |    |    |
|          | GPSM2   |    | 1  | 2  |
| II       | GPT2    | 2  | 4  | 5  |
| II       | GPX1    | 3  | 4  | 5  |
| III      | GPX4    | 1  |    | 2  |
| II       | GPX8    | 2  | 1  | 4  |
| III      | GRAMD1A |    |    |    |
|          | GRAMD1B |    |    |    |
|          | GRAMD3  |    |    | 1  |
|          | GRAMD4  |    |    | 1  |
|          | GRB10   |    | 3  | 7  |
| III      | GRB2    |    | 2  | 4  |
| III      | GRB7    |    |    |    |
|          | GREB1L  |    | 1  | 1  |
|          | GRHL1   |    |    |    |
| III      | GRHPR   | 1  |    | 1  |

|          |          |   |   |    |
|----------|----------|---|---|----|
| II       | GRINA    | 5 | 8 | 7  |
| III      | GRIPAP1  |   |   | 1  |
|          | GRK5     |   |   | 4  |
| III      | GRK6     |   |   | 4  |
| II       | GRN      | 1 | 5 | 4  |
| II       | GRPEL1   | 1 | 1 | 4  |
| II + III | GRPEL2   | 3 | 2 | 6  |
| II       | GRSF1    | 1 | 3 | 3  |
| III      | G RTP1   |   |   |    |
| II + III | GRWD1    | 2 | 5 | 9  |
| II + III | GSG2     | 2 | 5 | 12 |
| III      | GSK3A    |   | 2 | 1  |
| II       | GSK3B    | 1 | 3 | 7  |
| III      | GSN      |   |   | 1  |
| II       | GSPT1    | 1 | 6 | 10 |
| III      | GSR      |   | 1 | 3  |
| III      | GSS      |   | 2 | 1  |
| III      | GSTA4    |   |   |    |
|          | GSTCD    |   |   |    |
| II       | GSTK1    | 2 | 2 | 6  |
| III      | GSTM3    |   |   | 1  |
| III      | GSTM4    |   | 2 | 4  |
| III      | GSTO1    |   |   |    |
| II       | GSTP1    | 1 | 3 | 3  |
| III      | GSTT1    |   |   |    |
| III      | GSTT2    |   |   |    |
| III      | GSTZ1    |   |   |    |
|          | GTDC1    |   |   |    |
| II       | GTF2A1   | 1 | 1 | 2  |
| II       | GTF2A2   | 1 | 2 | 3  |
| III      | GTF2B    |   |   |    |
| II + III | GTF2E1   | 2 | 1 | 2  |
| III      | GTF2E2   |   |   | 1  |
| III      | GTF2F1   |   |   | 6  |
| III      | GTF2F2   |   |   | 1  |
| III      | GTF2H1   |   |   | 3  |
| III      | GTF2H2   |   |   |    |
|          | GTF2H3   |   |   | 1  |
| II       | GTF2H4   | 1 | 1 | 1  |
| III      | GTF2H5   |   |   | 1  |
|          | GTF2I    |   |   | 2  |
| III      | GTF2IRD1 |   |   |    |
| III      | GTF3A    | 1 |   |    |
| II       | GTF3C1   | 4 | 3 | 3  |
| II       | GTF3C2   | 1 | 2 | 7  |
|          | GTF3C3   |   |   |    |
| II + III | GTF3C4   | 5 | 9 | 15 |
| III      | GTF3C5   |   | 2 | 7  |
| III      | GTF3C6   |   |   | 1  |
| II       | GTPBP1   | 1 | 4 | 5  |
| III      | GTPBP10  |   | 1 | 5  |

|          |        |   |   |    |
|----------|--------|---|---|----|
| II + III | GTPBP2 | 1 | 6 | 15 |
| III      | GTPBP3 |   | 1 | 2  |
| III      | GTPBP4 |   | 1 |    |
| II + III | GTPBP5 | 4 | 4 | 11 |
| III      | GTPBP6 |   |   |    |
| III      | GTPBP8 |   |   | 1  |
| II       | GTSE1  | 2 | 1 | 7  |
| III      | GUF1   |   |   |    |
| III      | GUK1   |   | 1 | 1  |
| III      | GULP1  |   | 1 | 1  |
| III      | GUSB   | 1 |   | 1  |
|          | GXYLT1 |   |   | 3  |
| II       | GXYLT2 | 1 | 1 | 4  |
| III      | GYG1   |   |   | 1  |
| III      | GYG2   |   |   |    |
| III      | GYS1   |   |   | 5  |
|          | GZF1   |   | 1 |    |
| III      | H19    |   | 3 | 3  |
| III      | H1F0   |   |   | 1  |
| II       | H1FX   | 1 | 5 | 4  |
| III      | H2AFJ  |   |   | 1  |
| II       | H2AFV  | 2 | 2 | 1  |
| II + III | H2AFX  | 7 | 4 | 11 |
| III      | H2AFY  |   | 3 | 3  |
| II       | H2AFZ  | 1 | 2 | 1  |
| III      | H3F3B  |   | 1 | 2  |
| II + III | H6PD   | 1 | 4 | 14 |
| III      | HABP4  |   |   |    |
|          | HACE1  |   |   |    |
| III      | HACL1  |   |   |    |
| III      | HADH   |   | 2 |    |
| III      | HADHA  |   | 2 | 4  |
| III      | HADHB  |   | 1 |    |
| III      | HAGH   |   |   |    |
| III      | HAGHL  |   |   |    |
| II + III | HARBI1 | 1 | 1 | 1  |
| III      | HARS   |   |   | 1  |
| II + III | HARS2  | 1 | 1 | 2  |
| III      | HAT1   |   |   |    |
| III      | HAUS1  |   | 1 |    |
| III      | HAUS2  |   |   | 2  |
|          | HAUS3  |   | 1 | 4  |
| III      | HAUS4  |   |   | 1  |
| III      | HAUS5  |   |   | 2  |
|          | HAUS6  |   | 2 | 3  |
| III      | HAUS7  |   |   |    |
| III      | HAUS8  |   |   |    |
| III      | HAX1   | 2 |   | 3  |
|          | HBP1   |   |   |    |
| III      | HBS1L  |   | 1 | 2  |
| III      | HBXIP  |   |   |    |

|          |         |   |    |    |
|----------|---------|---|----|----|
| III      | HCCS    | 1 |    | 2  |
| II       | HCFC1   | 8 | 12 | 24 |
| III      | HCFC1R1 | 2 |    | 3  |
|          | HCFC2   |   |    | 1  |
| III      | HCN2    |   | 1  | 5  |
| III      | HDAC1   |   |    |    |
| III      | HDAC10  |   |    |    |
| III      | HDAC11  |   |    |    |
| III      | HDAC2   |   | 1  |    |
| III      | HDAC3   |   |    | 1  |
|          | HDAC4   |   |    | 4  |
| III      | HDAC5   |   |    | 1  |
| III      | HDAC6   |   |    | 1  |
| II       | HDAC7   | 1 | 3  | 8  |
| III      | HDAC8   |   |    | 1  |
| III      | HDDC2   |   | 1  | 5  |
| III      | HDDC3   |   | 1  | 2  |
| II       | HDGF    | 7 | 13 | 13 |
| III      | HDGFRP2 |   |    |    |
| III      | HDGFRP3 |   |    |    |
|          | HDHD1   |   | 1  |    |
| III      | HDHD2   |   |    |    |
| II + III | HDHD3   | 2 | 2  | 5  |
| II       | HDLBP   | 4 | 4  | 12 |
| II + III | HEATR1  | 1 | 2  | 4  |
| II       | HEATR2  | 5 | 2  | 16 |
|          | HEATR3  |   |    |    |
|          | HEATR5A |   |    |    |
|          | HEATR5B |   |    | 1  |
| II + III | HEATR6  | 1 | 1  | 1  |
| III      | HEATR7A |   |    |    |
| III      | HEBP1   |   |    |    |
| III      | HEBP2   |   |    |    |
| II + III | HECA    | 1 | 2  | 5  |
|          | HECTD1  |   | 2  | 1  |
| III      | HECTD3  |   |    |    |
|          | HECW1   |   | 2  | 1  |
| II + III | HEG1    | 8 | 11 | 16 |
|          | HELB    |   |    | 1  |
| III      | HELLS   | 1 |    | 1  |
|          | HELQ    |   |    | 3  |
| II       | HELZ    | 1 | 5  | 4  |
| III      | HEMK1   |   |    | 3  |
|          | HENMT1  |   |    |    |
|          | HERC1   |   |    |    |
|          | HERC2   |   |    |    |
|          | HERC3   |   |    | 1  |
|          | HERC4   |   | 2  |    |
|          | HERC5   | 1 |    |    |
| II       | HERPUD1 | 1 | 5  | 3  |
|          | HERPUD2 | 1 |    | 1  |



|          |           |   |   |    |
|----------|-----------|---|---|----|
| III      | HES6      |   |   |    |
| III      | HES7      |   |   | 1  |
| III      | HEXA      | 2 |   |    |
| II       | HEXB      | 3 | 2 | 2  |
| III      | HEXDC     |   |   |    |
| II       | HEXIM1    | 2 | 4 | 8  |
|          | HEXIM2    |   |   |    |
|          | HEY1      |   | 1 | 1  |
|          | HFE       |   |   | 1  |
| III      | HGS       |   | 1 |    |
| II       | HGSNAT    | 2 | 3 | 2  |
|          | HHAT      |   |   | 1  |
| III      | HHEX      |   |   |    |
| III      | HHLA3     |   |   |    |
| II       | HIAT1     | 1 | 3 | 4  |
| II       | HIATL1    | 4 | 3 | 9  |
|          | HIBADH    |   |   | 2  |
| III      | HIBCH     |   |   | 1  |
| II       | HIF1A     | 2 | 3 | 3  |
| III      | HIF1AN    |   |   | 1  |
| III      | HIGD1A    |   |   | 1  |
| II       | HIGD2A    | 1 | 1 | 4  |
|          | HILPDA    |   |   |    |
|          | HINFP     | 1 |   |    |
| II       | HINT1     | 2 | 1 | 2  |
| III      | HINT2     |   | 1 | 1  |
| III      | HINT3     |   |   | 1  |
| II       | HIP1      | 3 | 6 | 11 |
| III      | HIP1R     |   | 1 |    |
| II + III | HIPK1     | 3 | 5 | 12 |
| II + III | HIPK3     | 3 | 2 | 6  |
|          | HIRA      | 1 | 1 |    |
| III      | HIRIP3    |   |   |    |
| II + III | HIST1H1C  | 1 | 3 | 4  |
| II + III | HIST1H2AC | 1 | 1 | 3  |
| II + III | HIST1H2AG | 1 | 2 | 1  |
| II + III | HIST1H2AI | 1 | 3 | 1  |
|          | HIST1H2AM |   |   |    |
|          | HIST1H2BC |   | 1 |    |
| II + III | HIST1H2BD | 3 | 1 | 2  |
|          | HIST1H2BF | 1 |   | 2  |
|          | HIST1H2BJ | 2 |   | 2  |
| II       | HIST1H2BK | 1 | 1 | 4  |
| II + III | HIST1H2BN | 1 | 1 | 2  |
|          | HIST1H2BO |   | 1 |    |
| II + III | HIST1H3D  | 1 | 1 | 3  |
|          | HIST1H3H  |   | 2 |    |
| II + III | HIST1H4H  | 1 | 1 | 3  |
|          | HIST1H4I  |   |   |    |
|          | HIST2H2AC |   |   |    |
| II + III | HIST2H2BE | 1 | 3 | 1  |

|          |           |   |    |    |
|----------|-----------|---|----|----|
|          | HIST3H2A  | 1 |    |    |
| II + III | HIVEP1    | 5 | 7  | 17 |
| II + III | HIVEP2    | 2 | 2  | 6  |
|          | HJURP     |   | 3  | 4  |
| II       | HK1       | 2 | 1  | 2  |
|          | HK2       | 2 |    |    |
| III      | HLA-A     |   | 2  | 1  |
| III      | HLA-B     |   |    |    |
| III      | HLA-C     |   |    |    |
| III      | HLA-E     |   | 2  | 1  |
| II + III | HLCS      | 2 | 2  | 4  |
| III      | HLTF      |   |    | 2  |
| II       | HM13      | 5 | 18 | 18 |
|          | HMBOX1    |   |    | 1  |
| III      | HMBS      |   |    |    |
|          | HMG20A    | 1 |    | 4  |
| II       | HMG20B    | 1 | 1  | 3  |
| II       | HMGA1     | 1 | 5  | 7  |
| III      | HMGB2     |   |    |    |
| III      | HMGB3     |   |    | 3  |
| III      | HMGCL     |   | 1  |    |
| II       | HMGCR     | 1 | 2  | 1  |
| II       | HMGCS1    | 1 | 5  | 3  |
| III      | HMGN1     |   |    |    |
| III      | HMGN2     |   |    | 3  |
| III      | HMGN3     |   | 1  | 1  |
|          | HMGN4     | 1 |    | 1  |
| II       | HMGXB3    | 3 | 5  | 12 |
|          | HMGXB4    | 1 |    | 2  |
| III      | HMHA1     |   |    |    |
| III      | HMMR      |   | 1  |    |
| III      | HMOX1     |   |    | 1  |
| III      | HMOX2     |   |    | 3  |
| III      | HN1       | 1 |    | 1  |
|          | HN1L      |   | 1  | 6  |
| II       | HNRNPA0   | 7 | 11 | 14 |
|          | HNRNPA1L2 |   | 1  |    |
| II       | HNRNPA2B1 | 8 | 4  | 5  |
| III      | HNRNPAB   |   | 3  | 3  |
| II       | HNRNPC    | 4 | 1  | 6  |
| III      | HNRNPD    |   |    |    |
| II + III | HNRNPF    | 2 | 1  | 3  |
| II       | HNRNPH1   | 1 | 2  | 4  |
| III      | HNRNPH3   |   |    | 1  |
| II       | HNRNPK    | 1 | 5  | 4  |
| III      | HNRNPL    |   | 3  | 6  |
| III      | HNRNPM    | 3 | 1  |    |
| III      | HNRNPR    |   | 3  | 2  |
| II       | HNRNPU    | 4 | 7  | 8  |
| II       | HNRNPUL1  | 1 | 2  | 6  |
| III      | HNRNPUL2  |   | 1  | 2  |

|          |           |   |   |    |
|----------|-----------|---|---|----|
| III      | HNRPDL    |   | 1 | 2  |
|          | HNRPLL    |   |   | 1  |
| III      | HOGA1     |   |   |    |
|          | HOMER1    |   | 1 |    |
| III      | HOMER2    |   |   | 1  |
| III      | HOMER3    |   | 2 | 1  |
|          | HOMEZ     |   |   | 2  |
| III      | HOOK3     |   | 1 | 2  |
| III      | HORMAD1   |   |   |    |
|          | HOTAIR    |   |   | 1  |
| III      | HOTAIRM1  |   |   | 3  |
|          | HOXA10    |   | 1 | 4  |
|          | HOXA11    |   | 4 | 9  |
|          | HOXA11-AS |   |   | 1  |
|          | HOXA13    |   |   |    |
|          | HOXA4     |   |   |    |
|          | HOXB13    |   |   | 3  |
| II       | HOXB6     | 1 | 4 | 10 |
| III      | HOXB7     |   |   | 2  |
| III      | HOXB9     |   |   | 4  |
| II       | HOXC10    | 1 | 3 | 6  |
| II + III | HOXC11    | 2 | 4 | 7  |
| II + III | HOXC13    | 2 | 3 | 5  |
| III      | HOXC9     |   |   | 2  |
|          | HOXD11    |   |   | 1  |
|          | HOXD8     | 1 |   | 3  |
|          | HOXD9     |   | 1 | 3  |
| II       | HP1BP3    | 1 | 3 | 3  |
| III      | HPCAL1    |   | 1 | 3  |
| III      | HPD       |   |   |    |
| II + III | HPDL      | 2 | 2 | 5  |
| III      | HPRT1     |   |   |    |
| III      | HPS1      |   |   | 1  |
|          | HPS3      |   |   | 2  |
|          | HPS4      |   |   | 5  |
| II + III | HPS5      | 1 | 1 | 3  |
| II + III | HPS6      | 4 | 4 | 10 |
| III      | HPSE      |   |   |    |
| II       | HR        | 5 | 5 | 7  |
| III      | HRAS      |   |   | 1  |
| II + III | HRCT1     | 1 | 2 | 4  |
| III      | HRSP12    |   |   |    |
| III      | HS1BP3    |   |   | 2  |
|          | HS2ST1    |   | 1 | 2  |
| II + III | HS6ST2    | 2 | 1 | 2  |
| III      | HSBP1     |   | 1 | 4  |
| III      | HSBP1L1   |   |   |    |
| III      | HSCB      |   |   | 2  |
|          | HSD17B1   |   |   |    |
| III      | HSD17B10  |   |   | 1  |
| III      | HSD17B11  |   |   | 1  |

|          |          |    |    |    |
|----------|----------|----|----|----|
| III      | HSD17B12 |    |    |    |
| III      | HSD17B4  |    |    | 2  |
| III      | HSD17B7  |    |    |    |
| III      | HSD17B8  |    | 1  | 1  |
| III      | HSD3B7   |    |    |    |
| II + III | HSDL1    | 2  | 2  | 8  |
| III      | HSDL2    |    |    | 2  |
| III      | HSF1     |    |    |    |
| III      | HSF2     |    |    |    |
| III      | HSF2BP   |    |    |    |
| II       | HSP90AA1 | 4  | 9  | 13 |
| II       | HSP90AB1 | 4  | 5  | 6  |
| II       | HSP90B1  | 5  | 9  | 5  |
|          | HSPA12A  |    | 3  | 3  |
| II + III | HSPA13   | 1  | 6  | 5  |
| II       | HSPA14   | 2  | 5  | 10 |
| II + III | HSPA1B   | 11 | 2  | 12 |
| III      | HSPA4    |    | 3  | 3  |
| III      | HSPA4L   |    |    | 1  |
| II       | HSPA5    | 3  | 14 | 9  |
| II       | HSPA8    | 7  | 7  | 12 |
| II       | HSPA9    | 4  | 6  | 6  |
| II       | HSPB1    | 1  | 2  | 1  |
| III      | HSPB11   |    |    |    |
| III      | HSPB7    |    |    | 1  |
| II       | HSPB8    | 1  | 1  | 2  |
|          | HSPBAP1  |    |    | 1  |
| III      | HSPBP1   |    | 2  | 3  |
| II       | HSPD1    | 1  | 3  | 2  |
| II       | HSPH1    | 1  | 3  | 2  |
| III      | HTATIP2  |    | 1  | 2  |
| III      | HTATSF1  |    |    | 1  |
|          | HTRA1    |    | 1  |    |
| III      | HTRA2    |    |    | 1  |
| II       | HTRA3    | 1  | 4  | 5  |
| II       | HTT      | 1  | 2  | 2  |
| III      | HUS1     |    | 1  | 3  |
| II       | HUWE1    | 6  | 12 | 16 |
| II + III | HYAL1    | 4  | 4  | 7  |
| II + III | HYAL2    | 4  | 3  | 5  |
| II       | HYOU1    | 2  | 12 | 8  |
| III      | IAH1     |    |    |    |
| II + III | IARS     | 4  | 8  | 5  |
|          | IARS2    |    | 1  |    |
|          | IBTK     |    |    |    |
| II + III | ICAM1    | 10 | 11 | 11 |
| III      | ICAM3    |    |    |    |
|          | ICAM5    |    |    |    |
| II + III | ICMT     | 5  | 12 | 16 |
| II + III | ICOSLG   | 3  | 7  | 15 |
| III      | ICT1     |    |    | 1  |

|          |         |    |    |    |
|----------|---------|----|----|----|
| III      | ID1     |    |    | 4  |
|          | ID2     |    |    |    |
| II       | ID3     | 2  | 3  | 3  |
|          | IDE     |    |    | 2  |
| III      | IDH1    |    | 1  | 1  |
| III      | IDH2    |    |    |    |
| III      | IDH3A   |    | 1  | 1  |
| III      | IDH3B   |    |    |    |
| III      | IDH3G   |    |    |    |
| III      | IDI1    |    |    |    |
| II       | IDS     | 1  | 1  | 3  |
| II + III | IER2    | 11 | 8  | 8  |
| II       | IER3    | 6  | 11 | 13 |
| III      | IER3IP1 |    | 1  |    |
| II + III | IER5    | 3  | 3  | 8  |
| II + III | IER5L   | 9  | 16 | 20 |
| III      | IFI27L1 |    |    |    |
| III      | IFI27L2 |    |    |    |
| II       | IFI30   | 1  | 2  | 1  |
| III      | IFI35   |    |    |    |
| III      | IFI6    |    |    |    |
| III      | IFITM1  |    |    | 1  |
| II       | IFITM2  | 1  | 1  | 1  |
| II       | IFITM3  | 3  | 1  | 4  |
| II       | IFNAR1  | 1  | 2  | 3  |
|          | IFNAR2  |    |    | 1  |
|          | IFNGR1  |    |    |    |
| III      | IFNGR2  |    |    | 2  |
| III      | IFRD1   | 1  |    | 2  |
| II       | IFRD2   | 2  | 4  | 7  |
| III      | IFT122  |    |    |    |
| III      | IFT140  |    |    |    |
| III      | IFT172  |    |    |    |
| III      | IFT20   |    |    |    |
| III      | IFT27   |    |    |    |
| III      | IFT43   |    |    |    |
| III      | IFT46   |    |    |    |
| III      | IFT52   | 1  |    |    |
| III      | IFT57   |    |    |    |
| III      | IFT80   |    |    |    |
| III      | IFT81   |    |    |    |
| III      | IFT88   |    | 1  | 3  |
| II       | IGBP1   | 2  | 2  | 3  |
| II + III | IGF1R   | 15 | 21 | 29 |
| II       | IGF2BP1 | 4  | 9  | 13 |
|          | IGF2BP2 |    |    | 2  |
|          | IGF2BP3 |    | 1  | 1  |
| II       | IGF2R   | 6  | 4  | 10 |
| II       | IGFBP3  | 2  | 3  | 5  |
| II       | IGFBP4  | 3  | 4  | 10 |
| III      | IGFBP6  |    |    |    |

|          |         |    |    |    |
|----------|---------|----|----|----|
| II       | IGFBP7  | 3  | 6  | 4  |
| III      | IGFLR1  |    |    |    |
|          | IGHMBP2 |    | 2  | 5  |
| III      | IGSF8   | 1  |    |    |
| III      | IK      |    |    |    |
| III      | IKBIP   |    | 2  | 2  |
|          | IKBKAP  | 1  |    |    |
| II + III | IKBKB   | 1  | 3  | 4  |
| III      | IKBKE   |    |    |    |
| II       | IKBKG   | 2  | 1  | 2  |
|          | IKZF5   |    | 1  | 2  |
|          | IL10RB  |    |    |    |
| III      | IL11RA  |    |    |    |
|          | IL13RA1 |    | 4  | 8  |
|          | IL15RA  | 2  |    | 3  |
| II + III | IL17RA  | 5  | 7  | 11 |
| II + III | IL17RB  | 1  | 1  | 3  |
| III      | IL17RC  |    |    | 1  |
| III      | IL18    |    |    |    |
|          | IL27RA  |    |    | 2  |
| II + III | IL6R    | 2  | 5  | 10 |
| II + III | IL6ST   | 7  | 7  | 10 |
|          | IL7R    |    | 1  |    |
| III      | ILF2    |    | 1  | 3  |
| II       | ILF3    | 12 | 11 | 21 |
| II       | ILK     | 2  | 2  | 2  |
| III      | ILKAP   |    |    |    |
| III      | ILVBL   |    | 1  | 3  |
| III      | IMMP1L  |    |    | 2  |
| III      | IMMP2L  |    |    |    |
| II       | IMMT    | 1  | 2  | 3  |
| II + III | IMP3    | 4  | 1  | 4  |
| II       | IMP4    | 2  | 1  | 3  |
| III      | IMPA1   |    |    |    |
| III      | IMPA2   |    | 2  | 2  |
| III      | IMPACT  |    |    | 1  |
| II + III | IMPAD1  | 2  | 5  | 9  |
| III      | IMPDH1  |    |    |    |
| III      | IMPDH2  |    | 1  | 4  |
|          | INADL   |    |    |    |
| II       | INCENP  | 2  | 1  | 6  |
| II       | INF2    | 4  | 5  | 12 |
|          | ING1    |    |    | 3  |
|          | ING2    |    |    |    |
| III      | ING3    |    |    |    |
| III      | ING4    |    |    |    |
| II + III | ING5    | 2  | 1  | 7  |
| III      | INHA    | 1  |    |    |
|          | INO80   |    | 1  | 5  |
| III      | INO80C  |    |    |    |
| III      | INO80E  |    |    | 1  |

|          |         |    |    |    |
|----------|---------|----|----|----|
|          | INPP1   |    |    | 2  |
|          | INPP4A  |    |    | 1  |
| III      | INPP5A  |    | 1  | 4  |
| III      | INPP5B  |    |    | 1  |
| II       | INPP5E  | 2  | 1  | 6  |
|          | INPP5F  |    |    |    |
| III      | INPP5J  |    |    |    |
|          | INPP5K  |    | 1  | 1  |
| II       | INPPL1  | 5  | 9  | 14 |
| III      | INSIG1  |    | 4  | 4  |
| III      | INSIG2  |    | 1  |    |
| III      | INSL4   |    |    |    |
| II + III | INSR    | 3  | 3  | 3  |
| III      | INTS1   |    | 1  | 1  |
| II       | INTS10  | 4  | 2  | 4  |
| II       | INTS12  | 1  | 1  | 4  |
|          | INTS2   |    |    | 2  |
| II       | INTS3   | 3  | 3  | 2  |
| III      | INTS4   |    |    |    |
| II + III | INTS5   | 4  | 5  | 14 |
|          | INTS6   |    | 1  | 6  |
| II + III | INTS7   | 1  | 1  | 3  |
| III      | INTS8   |    |    |    |
|          | INTS9   |    | 2  | 2  |
| II + III | INVS    | 1  | 2  | 5  |
| II + III | IP6K1   | 4  | 7  | 17 |
| II       | IP6K2   | 2  | 1  | 4  |
|          | IPO11   |    |    | 2  |
| II       | IPO13   | 1  | 2  | 9  |
| III      | IPO4    |    | 2  | 3  |
| II + III | IPO5    | 1  | 3  | 5  |
| II + III | IPO7    | 3  | 9  | 9  |
| II       | IPO8    | 3  | 1  | 6  |
| II       | IPO9    | 4  | 4  | 3  |
|          | IPP     |    |    |    |
|          | IPPK    |    | 1  | 3  |
| III      | IQCB1   |    |    | 1  |
|          | IQCC    |    |    | 1  |
| III      | IQCE    |    |    | 3  |
| II       | IQGAP1  | 1  | 1  | 4  |
| III      | IQGAP3  |    | 2  | 2  |
| II + III | IQSEC1  | 2  | 2  | 13 |
| II       | IRAK1   | 2  | 5  | 6  |
| III      | IRAK4   |    |    | 1  |
|          | IREB2   |    | 1  | 4  |
| III      | IRF1    | 1  |    | 1  |
|          | IRF2    |    |    | 1  |
|          | IRF2BP1 |    | 3  | 14 |
| II + III | IRF2BP2 | 11 | 9  | 16 |
| II + III | IRF2BPL | 4  | 10 | 16 |
| III      | IRF3    |    | 1  | 2  |

|          |          |    |    |    |
|----------|----------|----|----|----|
| III      | IRF9     |    |    |    |
|          | IRGQ     | 2  |    | 3  |
| II + III | IRS1     | 6  | 8  | 19 |
| II + III | IRS2     | 13 | 8  | 31 |
| II       | IRX3     | 1  | 1  | 8  |
| II       | IRX5     | 1  | 3  | 5  |
| III      | ISCA2    |    |    | 1  |
| III      | ISCU     |    |    | 1  |
| III      | ISG15    | 1  |    |    |
| III      | ISG20    |    |    |    |
|          | ISG20L2  | 2  |    | 7  |
| II + III | ISL2     | 1  | 1  | 2  |
| III      | ISOC1    |    |    |    |
| II       | ISOC2    | 1  | 2  | 4  |
| II + III | IST1     | 4  | 4  | 12 |
|          | ITCH     |    | 1  | 3  |
| II       | ITFG1    | 1  | 1  | 6  |
| III      | ITFG2    |    |    | 1  |
| II       | ITFG3    | 4  | 3  | 4  |
| III      | ITGA2B   |    |    |    |
| II       | ITGA3    | 5  | 6  | 13 |
| II + III | ITGA5    | 9  | 16 | 16 |
|          | ITGA6    |    |    | 3  |
| III      | ITGAE    |    |    |    |
|          | ITGAV    |    | 1  | 2  |
| II       | ITGB1    | 2  | 3  | 2  |
| III      | ITGB1BP1 |    |    |    |
| III      | ITGB3BP  |    | 3  | 3  |
| II       | ITGB5    | 2  | 4  | 2  |
|          | ITGB8    |    |    | 1  |
| II       | ITM2B    | 2  | 1  | 1  |
| III      | ITM2C    |    | 1  | 2  |
| III      | ITPA     |    |    | 1  |
| III      | ITPK1    |    | 2  | 3  |
|          | ITPKA    |    |    | 2  |
| II       | ITPKB    | 5  | 3  | 10 |
|          | ITPKC    | 2  |    | 4  |
|          | ITPR1    |    | 1  |    |
|          | ITPR2    |    | 2  | 1  |
| II       | ITPR3    | 1  | 1  | 2  |
| II + III | ITPRIP   | 15 | 25 | 35 |
| II + III | ITPRIPL2 | 22 | 25 | 37 |
| III      | ITSN1    |    |    | 2  |
| III      | ITSN2    |    |    |    |
| II + III | IVD      | 4  | 7  | 16 |
| II       | IVNS1ABP | 1  | 1  | 6  |
| II       | IWS1     | 1  | 1  | 1  |
|          | JAG1     |    |    |    |
| II       | JAG2     | 4  | 2  | 4  |
| II + III | JAGN1    | 3  | 3  | 7  |
| II       | JAK1     | 1  | 2  | 1  |



|          |         |   |    |    |
|----------|---------|---|----|----|
| II       | JAK2    | 1 | 1  | 2  |
|          | JARID2  |   |    | 7  |
| III      | JAZF1   |   | 1  | 3  |
|          | JDP2    |   |    | 4  |
|          | JKAMP   | 1 |    | 1  |
|          | JMJD1C  |   | 7  | 11 |
|          | JMJD4   | 1 |    | 1  |
|          | JMJD6   | 1 |    | 1  |
| II       | JMJD8   | 2 | 3  | 5  |
| II + III | JMY     | 2 | 2  | 6  |
|          | JOSD1   |   | 2  | 6  |
| III      | JOSD2   | 1 |    |    |
|          | JPH1    |   |    | 7  |
| II + III | JPH3    | 3 | 1  | 12 |
| II       | JRK     | 1 | 1  | 3  |
|          | JRKL    |   |    | 1  |
| III      | JTB     |   | 4  | 6  |
|          | JUN     |   | 3  | 3  |
| II + III | JUNB    | 6 | 11 | 14 |
| II + III | JUND    | 9 | 7  | 17 |
| III      | JUP     | 2 |    | 3  |
| II + III | KANK1   | 1 | 2  | 2  |
| II       | KANK2   | 5 | 2  | 5  |
| II + III | KANK4   | 1 | 1  | 6  |
| II + III | KANSL1  | 2 | 9  | 16 |
|          | KANSL1L |   |    | 3  |
| III      | KANSL2  |   |    | 1  |
| II + III | KANSL3  | 1 | 3  | 6  |
| II       | KARS    | 1 | 2  | 4  |
| II       | KAT2A   | 3 | 2  | 5  |
|          | KAT2B   |   |    |    |
| III      | KAT5    |   |    |    |
| II + III | KAT6A   | 5 | 5  | 17 |
|          | KAT6B   |   | 1  | 1  |
| III      | KAT7    |   |    | 2  |
| III      | KAT8    |   |    | 1  |
| III      | KATNA1  |   |    |    |
|          | KATNAL1 |   | 1  |    |
| III      | KATNAL2 |   |    |    |
| III      | KATNB1  |   |    | 1  |
|          | KAZALD1 |   |    |    |
| III      | KAZN    |   |    | 1  |
|          | KBTBD2  |   | 3  | 3  |
|          | KBTBD4  |   |    | 1  |
| II + III | KBTBD6  | 2 | 2  | 4  |
|          | KBTBD7  | 1 |    | 1  |
| III      | KCMF1   |   | 1  | 2  |
| II       | KCNAB2  | 4 | 4  | 11 |
|          | KCNG1   |   | 2  | 4  |
| II       | KCNK1   | 3 | 5  | 9  |
|          | KCNK15  |   | 1  | 1  |

|          |          |   |    |    |
|----------|----------|---|----|----|
| III      | KCNN4    |   |    | 1  |
| III      | KCNQ1    |   |    |    |
|          | KCNS3    |   |    |    |
|          | KCTD1    |   | 4  | 11 |
|          | KCTD10   |   | 1  | 5  |
|          | KCTD11   | 1 |    | 7  |
| II + III | KCTD12   | 1 | 5  | 8  |
| III      | KCTD13   |   | 2  | 1  |
| II + III | KCTD15   | 2 | 4  | 10 |
| III      | KCTD17   | 1 |    | 2  |
|          | KCTD18   |   |    |    |
| II + III | KCTD2    | 1 | 2  | 10 |
| II + III | KCTD20   | 1 | 5  | 7  |
|          | KCTD21   |   | 2  | 5  |
|          | KCTD3    |   | 1  | 2  |
|          | KCTD5    |   | 4  | 13 |
|          | KCTD6    |   |    |    |
| II       | KCTD7    | 1 | 1  | 2  |
| III      | KDELC1   |   |    |    |
| II       | KDELC2   | 2 | 1  | 4  |
| II       | KDELR1   | 3 | 10 | 9  |
| II       | KDELR2   | 5 | 18 | 12 |
| II       | KDELR3   | 2 | 3  | 4  |
| II       | KDM1A    | 1 | 1  | 2  |
| III      | KDM1B    |   |    | 1  |
| II       | KDM2A    | 3 | 6  | 15 |
|          | KDM2B    |   | 1  | 4  |
|          | KDM3A    |   | 1  | 3  |
|          | KDM3B    |   | 5  | 9  |
|          | KDM4A    |   |    | 1  |
| III      | KDM4B    |   |    | 3  |
|          | KDM4C    | 1 |    | 1  |
|          | KDM5A    |   | 2  | 6  |
|          | KDM5B    |   | 4  | 3  |
| II       | KDM5C    | 2 | 4  | 10 |
| II + III | KDM6A    | 3 | 9  | 11 |
| II       | KDM6B    | 2 | 1  | 11 |
|          | KDM8     |   |    | 1  |
|          | KDSR     | 1 |    | 2  |
| II + III | KEAP1    | 1 | 2  | 2  |
|          | KHDC1    |   |    | 1  |
| II       | KHDRBS1  | 1 | 2  | 1  |
| III      | KHK      |   |    |    |
|          | KHNYN    |   | 3  | 11 |
| II       | KHSRP    | 2 | 6  | 17 |
| III      | KIAA0020 |   | 1  | 2  |
| II + III | KIAA0040 | 1 | 3  | 10 |
| II + III | KIAA0100 | 9 | 9  | 17 |
| III      | KIAA0101 |   |    |    |
| II       | KIAA0141 | 1 | 1  | 2  |
| III      | KIAA0146 |   |    | 4  |

|          |           |   |   |    |
|----------|-----------|---|---|----|
| II       | KIAA0182  | 4 | 2 | 6  |
| III      | KIAA0195  |   |   | 2  |
|          | KIAA0196  |   |   |    |
|          | KIAA0226  |   | 1 | 4  |
| II + III | KIAA0232  | 1 | 2 | 6  |
| II + III | KIAA0240  | 1 | 3 | 9  |
|          | KIAA0247  |   |   | 1  |
| II       | KIAA0284  | 5 | 7 | 5  |
| II + III | KIAA0317  | 1 | 3 | 4  |
|          | KIAA0319L |   | 4 | 2  |
|          | KIAA0355  |   | 4 | 5  |
|          | KIAA0368  |   | 2 | 2  |
|          | KIAA0391  |   | 1 | 2  |
|          | KIAA0430  |   |   |    |
| II       | KIAA0494  | 1 | 3 | 6  |
| II + III | KIAA0513  | 1 | 3 | 9  |
|          | KIAA0528  |   |   |    |
|          | KIAA0556  |   |   | 2  |
|          | KIAA0564  |   |   |    |
| III      | KIAA0586  | 1 |   | 1  |
| II       | KIAA0664  | 6 | 5 | 8  |
| II       | KIAA0753  | 2 | 1 | 3  |
|          | KIAA0754  |   |   |    |
| II + III | KIAA0825  | 1 | 4 | 4  |
|          | KIAA0895  |   |   | 1  |
|          | KIAA0895L |   |   |    |
|          | KIAA0907  |   | 2 | 5  |
|          | KIAA0913  |   |   | 2  |
| II + III | KIAA0922  | 1 | 1 | 2  |
| II       | KIAA0930  | 2 | 3 | 16 |
| II + III | KIAA0947  | 8 | 5 | 13 |
| III      | KIAA1009  |   | 1 |    |
|          | KIAA1033  |   |   | 2  |
|          | KIAA1109  |   |   | 4  |
| III      | KIAA1143  |   |   |    |
|          | KIAA1147  | 1 |   | 1  |
|          | KIAA1161  |   | 7 | 11 |
| III      | KIAA1191  |   | 2 | 3  |
|          | KIAA1211  |   | 1 |    |
| II + III | KIAA1244  | 1 | 2 | 8  |
| III      | KIAA1274  |   |   | 1  |
| III      | KIAA1279  |   |   |    |
|          | KIAA1324L |   |   |    |
| II + III | KIAA1429  | 2 | 1 | 8  |
|          | KIAA1430  |   |   | 1  |
|          | KIAA1432  |   | 2 | 5  |
| III      | KIAA1467  |   | 2 | 3  |
|          | KIAA1468  |   | 1 |    |
|          | KIAA1522  |   | 6 | 8  |
| III      | KIAA1524  |   | 1 |    |
| II + III | KIAA1549  | 2 | 4 | 8  |
| III      | KIAA1586  |   |   |    |

|          |           |   |    |    |
|----------|-----------|---|----|----|
| III      | KIAA1598  |   | 1  |    |
|          | KIAA1609  |   |    |    |
| II       | KIAA1644  | 3 | 5  | 13 |
| III      | KIAA1704  |   |    |    |
|          | KIAA1715  |   |    | 2  |
| II + III | KIAA1731  | 1 | 1  | 4  |
| II + III | KIAA1737  | 2 | 1  | 7  |
| II + III | KIAA1804  | 1 | 7  | 10 |
| III      | KIAA1841  |   |    |    |
|          | KIAA1919  |   | 1  |    |
| II + III | KIAA1958  | 3 | 7  | 24 |
| II       | KIAA1967  | 1 | 3  | 5  |
| II + III | KIAA2013  | 5 | 10 | 20 |
|          | KIAA2026  |   | 5  | 6  |
| II + III | KIDINS220 | 4 | 6  | 5  |
| III      | KIF11     |   |    | 4  |
| II + III | KIF13A    | 2 | 3  | 9  |
| III      | KIF13B    |   |    |    |
| III      | KIF14     |   |    |    |
| III      | KIF15     |   | 1  |    |
|          | KIF16B    | 1 |    | 2  |
|          | KIF18A    |   |    | 1  |
| II       | KIF18B    | 1 | 3  | 7  |
| II + III | KIF1B     | 1 | 5  | 10 |
| III      | KIF1C     |   | 3  | 10 |
| II       | KIF20A    | 1 | 1  | 3  |
| III      | KIF20B    |   |    |    |
| III      | KIF21A    |   | 1  | 1  |
| III      | KIF22     |   |    |    |
| III      | KIF23     |   |    | 1  |
| II + III | KIF24     | 2 | 3  | 7  |
| II       | KIF26A    | 6 | 5  | 6  |
|          | KIF26B    |   | 5  | 8  |
| II       | KIF2A     | 1 | 2  | 1  |
| II       | KIF2C     | 1 | 2  | 4  |
| III      | KIF3A     |   |    |    |
| II + III | KIF3B     | 2 | 2  | 14 |
|          | KIF3C     |   | 1  | 4  |
|          | KIF4A     |   |    | 2  |
| III      | KIF5B     |   | 3  | 5  |
|          | KIF7      |   |    |    |
|          | KIF9      | 1 |    | 1  |
|          | KIFAP3    |   |    |    |
| II       | KIFC1     | 4 | 1  | 8  |
| II       | KIFC3     | 1 | 5  | 5  |
| III      | KIN       |   |    |    |
| II       | KIRREL    | 6 | 15 | 25 |
|          | KITLG     | 2 |    | 2  |
| III      | KLC1      |   |    | 1  |
| III      | KLC2      |   |    | 3  |
| III      | KLC3      |   |    |    |

|          |         |    |    |    |
|----------|---------|----|----|----|
| III      | KLC4    |    |    |    |
|          | KLF10   |    | 3  | 5  |
|          | KLF11   |    | 2  | 8  |
| II + III | KLF13   | 12 | 11 | 28 |
|          | KLF15   |    | 1  | 4  |
| II       | KLF16   | 1  | 4  | 9  |
| II + III | KLF3    | 2  | 3  | 6  |
| II + III | KLF4    | 6  | 5  | 13 |
| II       | KLF5    | 3  | 3  | 4  |
| II + III | KLF6    | 2  | 1  | 2  |
|          | KLF7    |    | 2  | 3  |
|          | KLF9    | 1  |    | 2  |
| II       | KLHDC10 | 1  | 3  | 2  |
| III      | KLHDC2  |    |    |    |
| III      | KLHDC3  | 1  |    | 1  |
| III      | KLHDC4  |    |    | 1  |
| II + III | KLHDC5  | 1  | 1  | 9  |
| III      | KLHDC8B |    |    | 4  |
|          | KLHL11  | 1  |    | 4  |
|          | KLHL12  | 1  |    | 2  |
|          | KLHL13  |    |    |    |
|          | KLHL15  |    | 1  | 5  |
| III      | KLHL17  |    |    |    |
| II + III | KLHL18  | 4  | 9  | 15 |
|          | KLHL2   |    |    |    |
|          | KLHL20  | 1  |    | 2  |
| II + III | KLHL21  | 10 | 11 | 16 |
|          | KLHL22  |    | 1  | 1  |
|          | KLHL24  |    |    | 3  |
|          | KLHL25  |    | 2  | 5  |
| II + III | KLHL26  | 3  | 2  | 9  |
|          | KLHL28  |    |    | 3  |
|          | KLHL29  |    | 1  | 6  |
| III      | KLHL35  |    |    |    |
| II + III | KLHL36  | 1  | 2  | 9  |
| II + III | KLHL5   | 3  | 1  | 3  |
|          | KLHL7   |    |    |    |
|          | KLHL8   |    |    | 1  |
| II + III | KLHL9   | 1  | 1  | 9  |
|          | KNTC1   |    |    |    |
| II + III | KPNA1   | 3  | 9  | 12 |
| III      | KPNA2   |    | 4  | 4  |
| II + III | KPNA3   | 1  | 4  | 6  |
| III      | KPNA4   |    | 1  | 2  |
|          | KPNA5   |    |    | 1  |
| II       | KPNA6   | 2  | 9  | 19 |
| II       | KPNB1   | 2  | 7  | 13 |
| III      | KPTN    |    |    |    |
| III      | KRAS    |    |    |    |
|          | KRBA1   | 2  |    | 4  |
| III      | KRCC1   |    |    |    |

|          |         |    |    |    |
|----------|---------|----|----|----|
| III      | KRI1    | 4  |    | 7  |
| III      | KRIT1   |    | 1  | 1  |
| III      | KRR1    |    |    | 1  |
| III      | KRT10   |    | 2  | 4  |
| III      | KRT17   |    |    |    |
| III      | KRT18   | 1  | 2  |    |
| II       | KRT7    | 1  | 1  | 7  |
| III      | KRT8    | 4  |    | 3  |
| II       | KRT80   | 3  | 9  | 13 |
| III      | KRTCAP2 |    | 2  |    |
|          | KSR1    |    |    | 5  |
| III      | KTN1    | 1  |    | 2  |
| III      | KXD1    |    |    | 3  |
| III      | KYNU    |    |    |    |
| II       | L1CAM   | 10 | 19 | 17 |
| III      | L2HGDH  |    |    | 1  |
| II + III | L3MBTL2 | 3  | 2  | 9  |
|          | L3MBTL3 |    |    |    |
|          | LACE1   |    |    |    |
|          | LACTB   |    |    |    |
| III      | LACTB2  |    |    |    |
| III      | LAGE3   |    |    |    |
| II       | LAMA5   | 3  | 6  | 7  |
| II       | LAMB1   | 4  | 2  | 3  |
| III      | LAMB2   | 1  |    | 1  |
| III      | LAMB3   | 1  |    | 1  |
|          | LAMC1   |    | 4  | 7  |
| II       | LAMC3   | 2  | 1  | 4  |
| II       | LAMP1   | 1  | 3  | 3  |
| III      | LAMP2   |    | 1  | 2  |
| II       | LAMTOR1 | 1  | 1  | 2  |
| III      | LAMTOR2 |    |    | 1  |
| III      | LAMTOR3 |    |    |    |
| III      | LANCL1  |    |    |    |
| III      | LANCL2  |    |    | 1  |
| III      | LAP3    |    |    |    |
| III      | LAPTM4A |    | 6  | 4  |
| II       | LAPTM4B | 5  | 1  | 1  |
| II + III | LARP1   | 14 | 25 | 32 |
| II       | LARP1B  | 1  | 3  | 4  |
| II       | LARP4   | 2  | 8  | 11 |
| II       | LARP4B  | 1  | 3  | 3  |
|          | LARP6   |    |    |    |
| III      | LARP7   |    |    |    |
|          | LARS    | 2  |    | 1  |
| II       | LARS2   | 2  | 4  | 7  |
| III      | LAS1L   |    |    |    |
| II       | LASP1   | 2  | 6  | 7  |
| II + III | LATS1   | 3  | 6  | 22 |
| II + III | LATS2   | 11 | 17 | 14 |
| III      | LBH     |    |    |    |

|          |          |    |    |    |
|----------|----------|----|----|----|
| II       | LBR      | 1  | 7  | 5  |
| II       | LCLAT1   | 1  | 11 | 9  |
| III      | LCMT1    |    |    |    |
| II + III | LCMT2    | 1  | 1  | 3  |
| II       | LCORL    | 1  | 2  | 2  |
|          | LDB1     |    | 5  | 9  |
| II       | LDHA     | 7  | 4  | 5  |
| III      | LDHB     | 1  |    | 3  |
| III      | LDHD     |    |    |    |
| II + III | LDLR     | 12 | 13 | 16 |
| III      | LDLRAD3  |    | 1  | 2  |
| II       | LDLRAP1  | 1  | 2  | 6  |
| II       | LDOC1    | 1  | 3  | 3  |
| II + III | LDOC1L   | 16 | 16 | 37 |
| II       | LEMD2    | 2  | 4  | 6  |
| II + III | LEMD3    | 3  | 3  | 4  |
| III      | LENG1    |    | 1  | 1  |
| II       | LENG8    | 1  | 1  | 3  |
| II + III | LENG9    | 2  | 2  | 1  |
| III      | LEO1     |    |    |    |
|          | LEPR     |    |    | 1  |
| II       | LEPRE1   | 3  | 3  | 3  |
| III      | LEPREL1  |    | 1  | 4  |
| II       | LEPREL2  | 2  | 1  | 2  |
| II + III | LEPREL4  | 3  | 4  | 6  |
| II       | LEPROTL1 | 1  | 1  | 2  |
| II       | LETM1    | 4  | 5  | 10 |
| II       | LETMD1   | 1  | 1  | 1  |
| III      | LGALS1   |    |    |    |
| III      | LGALS3   |    |    | 1  |
| II       | LGALS3BP | 13 | 20 | 24 |
|          | LGALS8   |    |    | 3  |
|          | LGALSL   | 1  |    | 1  |
| III      | LGMN     | 1  | 1  |    |
| II + III | LGR4     | 5  | 9  | 10 |
|          | LHFP     |    | 1  | 2  |
| II + III | LHFPL2   | 1  | 1  | 9  |
| III      | LHPP     |    |    |    |
|          | LHX2     |    | 1  | 6  |
| II + III | LHX4     | 1  | 1  | 6  |
| III      | LIAS     |    |    |    |
| II + III | LIFR     | 3  | 11 | 17 |
| III      | LIG1     |    | 1  | 2  |
|          | LIG3     |    |    | 3  |
|          | LIG4     |    | 1  | 3  |
| II       | LIMA1    | 2  | 6  | 6  |
| II       | LIMCH1   | 4  | 11 | 10 |
| II + III | LIMD1    | 3  | 4  | 12 |
| III      | LIME1    |    |    | 2  |
| III      | LIMK1    |    | 1  | 2  |
| II       | LIMK2    | 1  | 1  | 3  |

|          |              |    |    |    |
|----------|--------------|----|----|----|
| III      | LIMS1        |    |    |    |
| III      | LIN37        |    |    |    |
|          | LIN52        |    |    | 1  |
|          | LIN54        |    | 2  | 7  |
| III      | LIN7B        |    |    |    |
| III      | LIN7C        |    | 2  | 5  |
|          | LIN9         |    |    | 1  |
| III      | LINC00085    |    | 1  |    |
| II + III | LINC00094    | 1  | 2  | 1  |
| III      | LINC00116    |    |    |    |
| III      | LINC00162    |    |    | 1  |
| II       | LINC00263    | 2  | 1  | 4  |
| III      | LINC00265    |    | 1  | 3  |
| II + III | LINC00319    | 1  | 4  | 7  |
|          | LINC00339    |    |    | 1  |
| III      | LINC00467    |    |    | 1  |
| II + III | LINC00473    | 15 | 21 | 33 |
| III      | LINC00493    |    |    |    |
|          | LINS         |    | 1  | 2  |
| III      | LIPA         |    |    |    |
|          | LIPT1        |    |    |    |
|          | LIPT2        |    |    | 1  |
| II       | LITAF        | 1  | 2  | 2  |
| III      | LIX1L        |    |    |    |
| III      | LLGL1        | 1  | 1  |    |
| III      | LLGL2        |    |    |    |
| III      | LMAN1        |    | 2  | 4  |
| II       | LMAN2        | 1  | 3  | 4  |
|          | LMAN2L       |    | 1  | 4  |
| II + III | LMBR1        | 3  | 9  | 9  |
| III      | LMBR1L       |    |    | 1  |
| III      | LMBRD1       |    |    |    |
|          | LMBRD2       |    |    | 2  |
| II       | LMF2         | 1  | 1  | 2  |
| II       | LMNA         | 4  | 4  | 5  |
| III      | LMNB1        |    |    | 3  |
| II       | LMNB2        | 2  | 1  | 5  |
| III      | LMO1         |    |    |    |
| III      | LMO4         |    | 2  | 2  |
| II       | LMO7         | 1  | 1  | 3  |
| II + III | LMTK2        | 10 | 12 | 15 |
|          | LNP1         |    |    |    |
| II + III | LNPEP        | 3  | 7  | 8  |
|          | LNX2         |    | 1  | 3  |
|          | LOC100128822 |    |    |    |
| III      | LOC100128881 |    | 1  | 4  |
| III      | LOC100129250 |    |    |    |
|          | LOC100129361 |    | 1  | 3  |
| III      | LOC100129917 |    |    |    |
|          | LOC100130093 |    |    | 1  |
|          | LOC100130776 |    | 3  | 5  |



|          |              |   |   |    |
|----------|--------------|---|---|----|
|          | LOC100131089 |   |   |    |
| III      | LOC100132352 |   |   |    |
| III      | LOC100216545 |   |   | 1  |
|          | LOC100270746 |   |   |    |
| III      | LOC100271722 |   |   |    |
|          | LOC100287015 |   | 1 | 1  |
|          | LOC100287177 |   |   | 1  |
|          | LOC100287482 |   |   |    |
|          | LOC100288842 |   |   |    |
|          | LOC100288911 |   |   |    |
| III      | LOC100289092 |   | 1 | 1  |
|          | LOC100289341 |   |   | 2  |
|          | LOC100289361 |   |   |    |
| II + III | LOC100292680 | 2 | 1 | 8  |
| III      | LOC100505483 |   |   | 1  |
| III      | LOC100505666 |   |   |    |
| III      | LOC100505761 |   |   |    |
| III      | LOC100505783 |   |   | 1  |
| II       | LOC100505876 | 2 | 1 | 2  |
|          | LOC100506033 |   |   |    |
| III      | LOC100506054 |   |   |    |
| III      | LOC100506100 |   |   |    |
| II + III | LOC100506190 | 4 | 7 | 11 |
| III      | LOC100506233 |   |   | 1  |
|          | LOC100506451 |   |   | 1  |
| III      | LOC100506548 |   | 2 | 3  |
| II + III | LOC100506668 | 3 | 1 | 9  |
|          | LOC100506688 |   |   | 2  |
| II + III | LOC100506710 | 3 | 1 | 12 |
|          | LOC100506714 |   |   |    |
| III      | LOC100506844 |   |   |    |
|          | LOC100506930 |   |   | 3  |
| III      | LOC100507217 | 1 |   | 3  |
|          | LOC100507246 |   |   | 6  |
|          | LOC100507410 |   |   |    |
|          | LOC100652730 |   |   | 1  |
|          | LOC147727    |   |   |    |
|          | LOC148189    |   |   |    |
| II + III | LOC148413    | 2 | 2 | 2  |
|          | LOC152217    |   | 1 | 1  |
| III      | LOC202781    |   |   |    |
| III      | LOC284023    |   |   |    |
|          | LOC284751    |   |   | 1  |
|          | LOC285074    |   |   |    |
|          | LOC286467    |   |   | 1  |
| III      | LOC338799    |   |   | 2  |
| III      | LOC339803    |   |   | 1  |
| III      | LOC375295    |   |   | 1  |
|          | LOC387647    |   |   |    |
| III      | LOC388796    |   | 3 | 1  |
| II       | LOC389641    | 1 | 1 | 1  |
|          | LOC400027    |   |   | 1  |

|          |           |    |    |    |
|----------|-----------|----|----|----|
|          | LOC400657 | 1  |    | 3  |
| III      | LOC401397 |    |    |    |
| III      | LOC401588 |    |    |    |
|          | LOC440288 |    |    |    |
|          | LOC440434 |    |    | 1  |
| III      | LOC440944 |    | 2  |    |
|          | LOC493754 | 1  |    | 1  |
|          | LOC550112 |    |    | 1  |
| III      | LOC550643 |    | 3  | 2  |
|          | LOC554206 |    |    |    |
| II + III | LOC642852 | 7  | 5  | 13 |
| III      | LOC644656 |    |    |    |
|          | LOC645212 |    |    |    |
| III      | LOC645249 |    |    |    |
| III      | LOC645638 |    |    |    |
| II + III | LOC646719 | 2  | 1  | 2  |
|          | LOC647946 |    |    | 1  |
|          | LOC728190 |    |    | 2  |
|          | LOC728431 |    |    | 2  |
| III      | LOC728554 |    |    | 1  |
|          | LOC728613 |    | 1  | 4  |
| III      | LOC729013 |    |    |    |
|          | LOC729852 |    |    |    |
| III      | LOC81691  |    |    |    |
| III      | LOC92249  |    | 2  | 4  |
|          | LOC93622  |    | 1  | 2  |
|          | LOC96610  |    |    | 6  |
|          | LOH12CR1  | 1  |    | 1  |
| II       | LONP1     | 5  | 2  | 7  |
| II       | LONP2     | 2  | 3  | 4  |
|          | LONRF1    |    |    | 1  |
|          | LONRF3    |    | 2  | 8  |
|          | LOX       |    |    | 1  |
| II       | LOXL2     | 4  | 2  | 2  |
| II       | LPCAT1    | 11 | 15 | 25 |
| III      | LPCAT3    |    | 2  | 3  |
| III      | LPCAT4    |    |    |    |
| II       | LPGAT1    | 2  | 3  | 6  |
| II       | LPHN1     | 4  | 12 | 28 |
|          | LPIN1     |    |    |    |
|          | LPIN2     |    |    |    |
| II       | LPL       | 4  | 15 | 14 |
| II       | LPP       | 1  | 2  | 4  |
| II       | LPPR2     | 1  | 1  | 4  |
|          | LRBA      |    |    | 1  |
| II       | LRCH1     | 1  | 1  | 4  |
| III      | LRCH3     |    |    | 1  |
| III      | LRCH4     |    |    | 1  |
| II + III | LRFN3     | 4  | 6  | 11 |
| II + III | LRFN4     | 22 | 25 | 33 |
|          | LRIF1     |    | 3  | 1  |
|          | LRIG1     |    |    | 2  |

|          |         |    |    |    |
|----------|---------|----|----|----|
| II + III | LRIG2   | 2  | 4  | 4  |
|          | LRIG3   |    | 1  |    |
|          | LRP1    | 1  |    | 1  |
| II       | LRP10   | 2  | 3  | 6  |
| III      | LRP11   |    | 3  | 4  |
|          | LRP12   |    | 2  | 5  |
| II       | LRP3    | 2  | 1  | 7  |
|          | LRP4    |    | 3  | 2  |
| II       | LRP5    | 3  | 3  | 4  |
| II + III | LRP6    | 2  | 6  | 11 |
| II       | LRP8    | 1  | 5  | 6  |
| II       | LRPAP1  | 6  | 2  | 4  |
|          | LRPPRC  |    | 3  | 2  |
|          | LRR1    |    |    | 4  |
|          | LRRC1   |    |    |    |
| II + III | LRRC14  | 5  | 1  | 17 |
|          | LRRC16A |    | 1  |    |
|          | LRRC20  |    | 1  | 1  |
| III      | LRRC23  |    | 1  | 1  |
|          | LRRC28  |    | 1  | 1  |
| III      | LRRC40  |    |    |    |
|          | LRRC41  | 1  |    | 6  |
|          | LRRC42  |    | 1  |    |
| III      | LRRC45  |    |    |    |
| III      | LRRC47  |    |    | 2  |
| III      | LRRC49  |    |    |    |
|          | LRRC57  | 1  |    | 1  |
|          | LRRC58  |    | 5  | 8  |
| II       | LRRC59  | 6  | 13 | 13 |
| II + III | LRRC61  | 2  | 1  | 4  |
| II + III | LRRC8A  | 12 | 10 | 26 |
| II + III | LRRC8C  | 1  | 4  | 6  |
| II + III | LRRC8D  | 2  | 5  | 9  |
| II + III | LRRC8E  | 1  | 3  | 8  |
| III      | LRRFIP1 | 1  |    | 1  |
| III      | LRRFIP2 | 1  |    | 5  |
| II + III | LRRN2   | 4  | 7  | 16 |
| III      | LRSAM1  |    | 1  | 2  |
| III      | LRTOMT  |    |    |    |
| III      | LRWD1   |    | 1  | 1  |
|          | LSG1    | 1  |    |    |
| III      | LSM1    |    |    |    |
| II + III | LSM10   | 1  | 2  | 5  |
|          | LSM11   |    |    | 2  |
| III      | LSM12   |    |    | 2  |
| III      | LSM14A  |    |    | 1  |
| II       | LSM14B  | 1  | 2  | 3  |
| III      | LSM2    |    |    | 2  |
| III      | LSM3    |    |    |    |
| II       | LSM4    | 2  | 1  | 1  |
| III      | LSM5    |    |    |    |

|          |          |    |    |    |
|----------|----------|----|----|----|
| III      | LSM6     |    |    |    |
| III      | LSM7     |    |    | 1  |
| III      | LSMD1    |    |    |    |
| III      | LSR      |    |    | 2  |
| III      | LSS      |    | 1  | 2  |
| III      | LTA4H    | 1  |    | 1  |
|          | LTBP1    | 1  |    | 2  |
| III      | LTBP3    |    |    | 1  |
| III      | LTBP4    |    |    |    |
| II       | LTBR     | 11 | 12 | 12 |
|          | LTN1     |    | 1  | 2  |
| III      | LTV1     |    |    | 1  |
| III      | LUC7L    |    |    |    |
| III      | LUC7L2   |    | 4  | 2  |
| III      | LUC7L3   |    |    | 3  |
| II + III | LUZP1    | 5  | 7  | 24 |
| III      | LY6E     | 3  |    | 1  |
| II       | LY6K     | 2  | 1  | 2  |
| III      | LYAR     |    | 1  | 1  |
|          | LYN      |    | 3  | 3  |
|          | LYPD1    |    |    | 2  |
| II       | LYPD3    | 4  | 5  | 7  |
|          | LYPD6    |    |    | 1  |
| III      | LYPLA1   |    |    |    |
| III      | LYPLA2   |    |    | 1  |
| III      | LYPLAL1  |    |    |    |
| III      | LYRM1    |    |    |    |
| III      | LYRM2    |    |    | 2  |
| III      | LYRM4    |    |    | 1  |
| III      | LYRM5    |    |    |    |
| III      | LYRM7    |    |    | 1  |
|          | LYSMD1   |    | 1  | 2  |
| III      | LYSMD2   |    |    |    |
| III      | LYSMD3   |    | 3  | 4  |
| III      | LZIC     |    |    |    |
| III      | LZTFL1   |    |    | 1  |
| II       | LZTR1    | 1  | 3  | 5  |
| II       | LZTS2    | 2  | 2  | 8  |
| II       | M6PR     | 2  | 1  | 1  |
|          | MACF1    |    | 1  |    |
| III      | MACROD1  | 1  |    | 1  |
| III      | MAD1L1   |    |    | 1  |
| III      | MAD2L1   |    |    | 2  |
| II + III | MAD2L1BP | 1  | 2  | 1  |
| III      | MAD2L2   | 1  |    | 1  |
|          | MADD     |    |    | 4  |
| II + III | MAEA     | 3  | 1  | 7  |
| II       | MAF1     | 1  | 3  | 1  |
| III      | MAFG     |    | 5  | 5  |
| II       | MAFK     | 5  | 6  | 16 |
| II       | MAGEA1   | 1  | 2  | 5  |

|          |          |   |    |    |
|----------|----------|---|----|----|
| III      | MAGEB2   |   |    |    |
| III      | MAGED2   |   |    |    |
| II + III | MAGEF1   | 1 | 2  | 1  |
|          | MAGI1    |   |    | 1  |
|          | MAGI3    |   |    | 2  |
| III      | MAGOH    |   |    |    |
| III      | MAGOHB   |   |    |    |
| II       | MAGT1    | 1 | 3  | 4  |
| III      | MAK16    |   | 1  | 4  |
| II       | MALAT1   | 7 | 29 | 32 |
| III      | MALSU1   |   |    |    |
|          | MALT1    |   | 2  | 3  |
|          | MAMDC2   |   |    |    |
| II + III | MAML1    | 1 | 8  | 21 |
| II + III | MAML3    | 3 | 1  | 16 |
|          | MAMLD1   |   |    | 2  |
|          | MAN1A1   |   |    | 1  |
| II + III | MAN1A2   | 5 | 5  | 10 |
| II       | MAN1B1   | 1 | 2  | 8  |
|          | MAN2A1   |   |    | 4  |
| III      | MAN2A2   |   |    | 2  |
| III      | MAN2B1   |   |    |    |
| II       | MAN2B2   | 1 | 1  | 5  |
| III      | MAN2C1   |   | 1  | 2  |
|          | MANBA    | 1 |    | 2  |
| II       | MANBAL   | 1 | 2  | 5  |
| II + III | MANEA    | 1 | 3  | 2  |
| II + III | MANEAL   | 2 | 6  | 9  |
| III      | MANF     |   | 2  | 2  |
|          | MANSC1   |   |    |    |
| III      | MAOB     |   |    |    |
|          | MAP1B    |   |    | 1  |
| III      | MAP1LC3B |   |    |    |
| II + III | MAP1S    | 5 | 8  | 21 |
| II       | MAP2K1   | 1 | 1  | 3  |
| III      | MAP2K2   |   |    | 2  |
| II       | MAP2K3   | 1 | 1  | 7  |
| II + III | MAP2K4   | 1 | 3  | 8  |
| III      | MAP2K5   |   | 1  | 1  |
|          | MAP2K6   |   |    |    |
| III      | MAP2K7   |   | 3  | 9  |
|          | MAP3K1   |   | 1  | 3  |
| II       | MAP3K10  | 2 | 2  | 4  |
| II       | MAP3K11  | 3 | 3  | 5  |
| III      | MAP3K12  |   |    |    |
|          | MAP3K13  |   | 2  | 2  |
| II       | MAP3K14  | 2 | 3  | 6  |
| II + III | MAP3K2   | 2 | 5  | 5  |
|          | MAP3K3   |   | 1  | 7  |
| II + III | MAP3K4   | 2 | 2  | 5  |
|          | MAP3K5   |   |    |    |

|          |           |   |   |    |
|----------|-----------|---|---|----|
| III      | MAP3K6    |   |   |    |
|          | MAP3K7    |   |   |    |
|          | MAP3K8    |   |   |    |
|          | MAP3K9    |   | 3 | 5  |
| II       | MAP4      | 1 | 2 | 5  |
| III      | MAP4K2    |   |   |    |
|          | MAP4K3    |   |   | 1  |
| III      | MAP4K4    |   |   | 1  |
| III      | MAP4K5    |   |   |    |
|          | MAP6D1    |   |   | 3  |
| II       | MAP7      | 1 | 1 | 3  |
| II       | MAP7D1    | 1 | 1 | 1  |
| III      | MAP7D3    | 2 |   | 2  |
| II       | MAPK1     | 2 | 2 | 8  |
| II       | MAPK11    | 1 | 1 | 2  |
| II       | MAPK12    | 2 | 1 | 5  |
|          | MAPK14    |   |   | 3  |
| II       | MAPK1IP1L | 1 | 8 | 8  |
| III      | MAPK3     |   |   | 1  |
| II + III | MAPK4     | 2 | 4 | 5  |
|          | MAPK6     |   | 5 | 5  |
|          | MAPK7     | 1 |   | 9  |
| III      | MAPK8     |   |   |    |
| III      | MAPK8IP1  |   |   | 1  |
| III      | MAPK8IP3  |   |   | 3  |
| III      | MAPK9     |   |   | 1  |
| III      | MAPKAP1   |   | 3 | 5  |
| II       | MAPKAPK2  | 2 | 2 | 8  |
| III      | MAPKAPK3  |   | 3 | 4  |
| III      | MAPKAPK5  |   |   | 1  |
| II       | MAPKBP1   | 1 | 4 | 7  |
| II       | MAPRE1    | 1 | 4 | 4  |
| III      | MAPRE2    |   | 3 | 2  |
| III      | MAPRE3    |   |   | 2  |
|          | MARC1     |   | 2 | 2  |
| III      | MARC2     |   |   | 1  |
|          | MARCH2    |   |   | 1  |
|          | MARCH3    |   |   |    |
| III      | MARCH5    |   |   | 2  |
|          | MARCH6    |   | 5 | 10 |
|          | MARCH7    |   |   | 3  |
|          | MARCH8    |   | 1 | 3  |
|          | MARCH9    |   | 1 | 3  |
| II       | MARCKS    | 1 | 2 | 5  |
| III      | MARCKSL1  |   | 1 | 2  |
|          | MARK1     |   |   | 1  |
|          | MARK2     |   | 3 | 13 |
| III      | MARK3     |   | 4 | 5  |
| III      | MARK4     |   | 1 | 3  |
| II       | MARS      | 1 | 1 | 5  |
| II + III | MARS2     | 1 | 3 | 10 |

|          |          |    |    |    |
|----------|----------|----|----|----|
| II + III | MARVELD1 | 3  | 2  | 5  |
|          | MAST2    | 2  |    | 4  |
|          | MAST3    |    |    |    |
|          | MASTL    |    |    | 1  |
| II + III | MAT2A    | 1  | 4  | 8  |
| III      | MAT2B    |    |    |    |
| III      | MATK     |    |    |    |
|          | MATN3    |    |    |    |
| III      | MATR3    |    | 8  | 7  |
| II       | MAU2     | 2  | 2  | 6  |
| II       | MAVS     | 2  | 1  | 6  |
| III      | MAX      |    | 1  | 2  |
| II       | MAZ      | 3  | 6  | 16 |
|          | MB21D1   |    | 1  | 2  |
|          | MB21D2   |    | 2  | 4  |
|          | MBD1     |    | 3  | 4  |
| III      | MBD2     |    | 1  | 1  |
| II       | MBD3     | 7  | 7  | 22 |
| II + III | MBD4     | 1  | 1  | 5  |
|          | MBD5     |    |    | 4  |
| II       | MBD6     | 1  | 4  | 6  |
| III      | MBIP     |    |    | 1  |
|          | MBLAC2   |    |    |    |
| II + III | MBNL1    | 2  | 12 | 16 |
| II + III | MBNL2    | 1  | 6  | 8  |
|          | MBNL3    |    | 1  | 1  |
| II + III | MBOAT1   | 2  | 1  | 4  |
|          | MBOAT2   | 2  |    | 1  |
| II       | MBOAT7   | 5  | 12 | 19 |
|          | MBP      |    | 2  | 6  |
|          | MBTD1    |    | 1  |    |
|          | MBTPS1   |    | 4  | 5  |
|          | MBTPS2   |    | 6  | 9  |
| II + III | MC1R     | 3  | 11 | 18 |
| II       | MCAM     | 11 | 19 | 26 |
|          | MCAT     | 2  |    | 3  |
| III      | MCCC1    |    | 1  | 1  |
| III      | MCCC2    |    | 1  |    |
| III      | MCEE     |    |    | 1  |
| III      | MCF2L    |    |    | 4  |
| II + III | MCFD2    | 1  | 2  | 3  |
|          | MCI      |    |    |    |
| II + III | MCL1     | 11 | 14 | 24 |
|          | MCM10    | 1  |    | 3  |
| II       | MCM2     | 5  | 1  | 5  |
| II       | MCM3     | 1  | 2  | 5  |
|          | MCM3AP   |    | 2  | 8  |
| III      | MCM4     | 2  |    | 5  |
| II       | MCM5     | 4  | 3  | 4  |
|          | MCM6     |    |    | 1  |
| II       | MCM7     | 1  | 4  | 7  |

|          |        |   |    |    |
|----------|--------|---|----|----|
|          | MCM8   |   | 1  |    |
|          | MCMBP  |   |    |    |
| III      | MCOLN1 | 1 |    | 1  |
|          | MCOLN2 | 1 |    | 2  |
|          | MCPH1  |   | 1  | 2  |
| III      | MCRS1  |   | 2  | 3  |
| III      | MCTS1  |   |    |    |
| III      | MCU    |   | 1  | 2  |
| II       | MDC1   | 5 | 10 | 22 |
|          | MDFIC  |   |    |    |
| III      | MDH1   |   | 1  | 3  |
| II       | MDH2   | 2 | 2  | 3  |
| III      | MDM1   |   |    | 1  |
| II + III | MDM2   | 4 | 3  | 9  |
|          | MDM4   |   | 2  | 9  |
| II       | MDN1   | 1 | 1  | 2  |
| III      | MDP1   |   |    |    |
| III      | ME1    | 1 |    | 2  |
| III      | ME2    |   |    |    |
| III      | MEA1   |   |    | 1  |
| III      | MEAF6  |   |    |    |
|          | MECOM  |   |    | 3  |
| II       | MECP2  | 2 | 2  | 10 |
| III      | MECR   |   |    |    |
| II + III | MED1   | 1 | 4  | 19 |
| II       | MED10  | 1 | 3  | 8  |
|          | MED11  |   | 1  | 3  |
| III      | MED12  | 1 |    | 4  |
| II + III | MED13  | 3 | 10 | 24 |
| II + III | MED13L | 6 | 8  | 21 |
|          | MED14  |   | 2  | 4  |
| II       | MED15  | 1 | 1  | 3  |
| III      | MED16  |   | 1  | 4  |
| III      | MED17  |   |    | 1  |
|          | MED18  |   |    | 1  |
| III      | MED19  |   |    | 2  |
|          | MED20  |   |    |    |
| III      | MED21  |   | 1  | 2  |
| II       | MED22  | 1 | 1  | 5  |
|          | MED23  |   |    |    |
| III      | MED24  |   | 1  |    |
| III      | MED25  |   |    |    |
| II + III | MED26  | 1 | 4  | 10 |
| III      | MED27  |   | 1  | 1  |
| III      | MED28  |   |    | 1  |
| II       | MED29  | 1 | 1  | 4  |
| III      | MED30  |   |    |    |
| III      | MED31  |   |    |    |
| III      | MED4   |   |    |    |
| II       | MED6   | 1 | 1  | 3  |
|          | MED7   |   |    |    |



|          |          |    |    |    |
|----------|----------|----|----|----|
| III      | MED8     | 1  |    | 1  |
|          | MED9     |    | 1  | 6  |
| II       | MEF2A    | 1  | 1  | 3  |
|          | MEF2BNB  | 2  | 1  |    |
| III      | MEF2D    |    | 1  | 4  |
| III      | MEGF8    |    | 2  | 3  |
| II + III | MEGF9    | 9  | 11 | 12 |
|          | MEIS1    |    |    |    |
| II + III | MEIS2    | 1  | 2  | 5  |
| II       | MELK     | 1  | 1  | 1  |
|          | MEMO1    |    |    | 2  |
| II       | MEN1     | 2  | 1  | 2  |
| II + III | MEPCE    | 5  | 7  | 18 |
| II + III | MESDC1   | 4  | 3  | 9  |
| II + III | MESDC2   | 3  | 8  | 8  |
| II + III | MET      | 7  | 8  | 19 |
|          | METAP1   |    |    | 1  |
|          | METAP1D  |    |    | 1  |
| II       | METAP2   | 1  | 1  | 4  |
| III      | METRNL   | 4  |    | 3  |
| II       | METTL1   | 1  | 2  | 2  |
| III      | METTL10  |    |    | 1  |
|          | METTL13  | 3  |    | 4  |
| II       | METTL14  | 1  | 1  | 2  |
| II       | METTL16  | 2  | 1  | 5  |
| III      | METTL17  |    | 1  |    |
|          | METTL18  |    | 1  |    |
| II       | METTL21A | 2  | 3  | 5  |
|          | METTL21B |    |    |    |
| III      | METTL21D |    |    | 1  |
| III      | METTL22  |    |    |    |
|          | METTL23  |    |    | 1  |
| III      | METTL2A  | 1  |    | 2  |
|          | METTL2B  |    |    | 1  |
| III      | METTL3   |    |    | 1  |
|          | METTL4   |    |    |    |
| III      | METTL5   |    |    |    |
| III      | METTL6   |    |    |    |
|          | METTL7A  |    |    | 1  |
|          | METTL8   |    |    | 1  |
|          | METTL9   |    | 4  | 4  |
|          | MEX3C    |    | 3  | 11 |
| II + III | MEX3D    | 4  | 7  | 13 |
| II       | MFAP1    | 4  | 1  | 2  |
| III      | MFAP2    |    |    |    |
| II + III | MFAP3    | 6  | 9  | 18 |
| III      | MFF      |    | 1  | 1  |
| III      | MFGE8    |    |    |    |
| II + III | MFHAS1   | 13 | 27 | 34 |
|          | MFN1     |    |    |    |

|          |          |    |    |    |
|----------|----------|----|----|----|
| II       | MFN2     | 2  | 1  | 5  |
| III      | MFSD1    |    |    |    |
| II       | MFSD10   | 1  | 1  | 2  |
|          | MFSD11   |    | 1  | 1  |
| II       | MFSD12   | 1  | 5  | 5  |
| III      | MFSD2A   |    |    | 1  |
| III      | MFSD3    | 1  |    | 1  |
| II + III | MFSD5    | 5  | 9  | 12 |
|          | MFSD6    | 1  |    | 3  |
|          | MFSD8    |    |    |    |
| II + III | MFSD9    | 1  | 1  | 4  |
| II + III | MGA      | 13 | 22 | 36 |
| II + III | MGAT1    | 10 | 17 | 28 |
| II + III | MGAT2    | 3  | 5  | 14 |
| II       | MGAT4B   | 5  | 4  | 10 |
| II + III | MGAT5    | 1  | 6  | 7  |
| III      | MGAT5B   |    | 1  | 4  |
| II + III | MGC2752  | 1  | 2  | 9  |
|          | MGC39372 |    |    | 4  |
| III      | MGC72080 |    |    |    |
|          | MGEA5    |    | 1  | 3  |
| III      | MGMT     |    |    |    |
| II       | MGRN1    | 1  | 3  | 2  |
| III      | MGST1    |    |    | 2  |
| III      | MGST2    |    | 1  | 1  |
| III      | MGST3    |    |    | 1  |
| II       | MIA3     | 1  | 2  | 5  |
|          | MIB1     |    | 1  |    |
| III      | MIB2     |    |    |    |
| II       | MICA     | 1  | 1  | 1  |
| III      | MICAL1   |    |    |    |
| II       | MICAL3   | 5  | 6  | 18 |
| II       | MICALL1  | 1  | 3  | 5  |
| III      | MICALL2  |    |    | 1  |
|          | MICU1    | 1  |    |    |
| II + III | MID1     | 2  | 2  | 7  |
| II + III | MID1IP1  | 3  | 9  | 16 |
| II       | MIDN     | 2  | 1  | 4  |
| III      | MIEN1    |    |    |    |
| III      | MIER1    |    |    | 2  |
| III      | MIER2    |    | 1  | 2  |
| II + III | MIER3    | 1  | 2  | 4  |
| III      | MIF4GD   |    | 1  | 2  |
| III      | MIIP     |    |    |    |
|          | MINA     |    | 1  | 2  |
| II       | MINK1    | 1  | 1  | 2  |
| III      | MINOS1   |    |    | 1  |
|          | MINPP1   |    |    | 4  |
|          | MIOS     |    | 1  | 2  |
| III      | MIPEP    |    |    |    |
| III      | MIPOL1   |    |    | 1  |

|          |          |    |    |    |
|----------|----------|----|----|----|
| III      | MIR100HG |    |    | 1  |
| III      | MIR31HG  |    |    | 2  |
| III      | MIS18A   |    |    | 1  |
| III      | MIS18BP1 |    | 1  | 2  |
| III      | MITD1    |    |    |    |
| II + III | MITF     | 1  | 4  | 6  |
| II       | MKI67    | 6  | 22 | 33 |
| III      | MKI67IP  |    |    | 1  |
|          | MKKS     |    |    |    |
| II       | MKL1     | 3  | 6  | 12 |
| II + III | MKL2     | 3  | 4  | 11 |
| II + III | MKLN1    | 1  | 1  | 8  |
| III      | MKNK1    |    |    | 1  |
| II       | MKNK2    | 1  | 2  | 7  |
| III      | MKRN1    |    | 2  | 2  |
| III      | MKRN2    |    | 2  | 1  |
|          | MKRN3    |    |    |    |
| III      | MKS1     |    |    |    |
|          | MKX      |    | 1  | 9  |
| II       | MLEC     | 11 | 10 | 18 |
| III      | MLF1     |    |    |    |
| III      | MLF1IP   |    |    |    |
| II       | MLF2     | 3  | 6  | 6  |
| III      | MLH1     |    |    |    |
|          | MLH3     | 2  |    | 2  |
| II       | MLKL     | 1  | 1  | 4  |
| II       | MLL      | 12 | 15 | 24 |
| II       | MLL2     | 24 | 36 | 62 |
| II       | MLL3     | 3  | 2  | 15 |
| II       | MLL4     | 3  | 3  | 14 |
| II       | MLL5     | 6  | 8  | 21 |
| II       | MLLT1    | 4  | 16 | 24 |
|          | MLLT10   |    |    | 3  |
| III      | MLLT11   |    |    | 2  |
|          | MLLT3    |    |    | 1  |
|          | MLLT4    |    |    |    |
| III      | MLLT6    |    | 2  | 8  |
| II       | MLST8    | 3  | 3  | 4  |
| II       | MLX      | 2  | 5  | 7  |
| II       | MLXIP    | 7  | 8  | 33 |
|          | MLYCD    |    |    | 1  |
| III      | MMAB     |    | 3  | 2  |
| III      | MMACHC   | 1  |    | 2  |
| III      | MMADHC   |    |    | 1  |
| III      | MMD      |    |    |    |
| III      | MMGT1    |    | 3  | 4  |
| II       | MMP15    | 2  | 3  | 6  |
|          | MMP17    |    |    | 1  |
| III      | MMP24    |    |    |    |
| III      | MMS19    |    |    | 2  |
| II + III | MMS22L   | 1  | 1  | 4  |

|          |           |   |    |    |
|----------|-----------|---|----|----|
| II + III | MN1       | 4 | 10 | 13 |
| III      | MNAT1     |   | 1  | 1  |
| III      | MND1      |   |    |    |
| III      | MNF1      |   |    | 2  |
| III      | MNT       |   | 1  | 10 |
|          | MOAP1     |   |    |    |
| III      | MOB1A     |   |    |    |
| III      | MOB1B     |   |    |    |
|          | MOB2      |   | 1  | 2  |
|          | MOB3A     |   | 1  | 5  |
|          | MOB3B     |   | 1  | 2  |
|          | MOB3C     |   |    |    |
| II + III | MOCOS     | 1 | 1  | 5  |
| III      | MOCS2     |   |    |    |
|          | MOCS3     |   | 3  | 8  |
| II       | MOGS      | 4 | 4  | 7  |
|          | MON1A     |   |    | 3  |
| II + III | MON2      | 1 | 1  | 3  |
| II       | MORC2     | 1 | 1  | 4  |
|          | MORC3     |   |    |    |
|          | MORC4     |   | 1  | 1  |
| III      | MORF4L1   |   | 1  | 1  |
| III      | MORF4L2   |   | 3  | 3  |
| III      | MORN1     |   | 1  | 3  |
| III      | MORN2     |   |    |    |
| III      | MOSPD1    |   | 1  | 2  |
|          | MOSPD2    | 1 |    | 1  |
| III      | MOSPD3    |   |    | 2  |
| II       | MOV10     | 1 | 1  | 2  |
| II       | MPDU1     | 3 | 6  | 5  |
|          | MPDZ      |   |    | 1  |
| III      | MPG       |   |    |    |
| III      | MPHOSPH10 |   |    | 1  |
| III      | MPHOSPH6  |   |    | 1  |
| III      | MPHOSPH8  |   |    |    |
|          | MPHOSPH9  |   |    |    |
| III      | MPI       |   |    | 2  |
| III      | MPLKIP    |   | 2  | 5  |
| III      | MPP1      |   |    |    |
| III      | MPP2      |   | 2  | 2  |
| III      | MPP3      |   |    | 1  |
|          | MPP5      |   | 1  | 3  |
| III      | MPP6      |   | 1  | 1  |
|          | MPP7      |   |    |    |
|          | MPPE1     |   |    |    |
| II       | MPRIP     | 3 | 4  | 14 |
| III      | MPST      |   |    |    |
| III      | MPV17     |   | 2  |    |
| III      | MPV17L2   |   | 1  | 5  |
| II       | MPZL1     | 1 | 1  | 9  |
| II       | MRAS      | 1 | 2  | 12 |

|          |          |   |   |   |
|----------|----------|---|---|---|
| III      | MRC2     |   | 1 | 2 |
| III      | MRE11A   |   |   |   |
| III      | MREG     |   |   | 1 |
| II       | MRFAP1   | 2 | 2 | 5 |
|          | MRFAP1L1 |   |   | 1 |
| II       | MRI1     | 2 | 2 | 2 |
| III      | MRM1     |   |   |   |
| II + III | MRP63    | 1 | 1 | 1 |
| III      | MRPL1    |   |   |   |
| II       | MRPL10   | 2 | 1 | 1 |
| III      | MRPL11   |   |   |   |
| III      | MRPL12   |   | 1 | 3 |
| III      | MRPL13   |   |   |   |
|          | MRPL14   | 2 |   | 5 |
| III      | MRPL15   |   |   | 1 |
| III      | MRPL16   |   |   |   |
|          | MRPL17   |   |   | 2 |
| III      | MRPL18   |   |   | 1 |
| III      | MRPL19   |   |   |   |
| III      | MRPL2    |   |   |   |
| III      | MRPL20   |   |   |   |
| III      | MRPL21   |   |   |   |
| III      | MRPL22   |   |   | 2 |
| III      | MRPL23   |   |   |   |
| III      | MRPL24   |   | 2 | 1 |
|          | MRPL27   | 1 |   | 1 |
| III      | MRPL28   |   |   |   |
| III      | MRPL3    |   | 2 | 4 |
| III      | MRPL30   |   | 1 | 1 |
| III      | MRPL32   |   |   |   |
| III      | MRPL33   |   |   |   |
| II + III | MRPL34   | 2 | 2 | 4 |
| II       | MRPL35   | 1 | 2 | 5 |
|          | MRPL36   |   | 1 | 4 |
| II       | MRPL37   | 1 | 5 | 4 |
| II       | MRPL38   | 1 | 1 | 2 |
| III      | MRPL39   |   |   |   |
| III      | MRPL4    | 1 |   | 1 |
| III      | MRPL40   |   | 1 | 2 |
| III      | MRPL41   |   |   |   |
| III      | MRPL42   |   |   |   |
| III      | MRPL43   |   |   |   |
|          | MRPL44   |   |   | 1 |
| III      | MRPL45   |   |   | 3 |
| III      | MRPL45P2 |   |   |   |
| III      | MRPL46   |   |   |   |
| III      | MRPL47   |   |   | 1 |
| III      | MRPL48   |   | 1 | 1 |
| III      | MRPL49   |   |   | 1 |
|          | MRPL50   | 1 |   | 3 |
| III      | MRPL51   |   | 1 |   |

|          |         |   |   |    |
|----------|---------|---|---|----|
| III      | MRPL52  |   |   |    |
| III      | MRPL53  |   |   |    |
| III      | MRPL54  |   |   |    |
| III      | MRPL55  |   |   | 1  |
| III      | MRPL9   |   | 3 | 3  |
| III      | MRPS10  |   |   |    |
| III      | MRPS11  |   | 1 | 4  |
| II       | MRPS12  | 3 | 6 | 6  |
| III      | MRPS14  |   |   |    |
| III      | MRPS15  |   |   | 1  |
| III      | MRPS16  |   | 3 | 5  |
|          | MRPS17  |   | 1 | 1  |
| III      | MRPS18A |   | 2 | 3  |
| III      | MRPS18B |   |   | 4  |
| III      | MRPS18C |   |   |    |
| II       | MRPS2   | 8 | 8 | 11 |
| II       | MRPS21  | 1 | 2 | 3  |
| III      | MRPS22  |   | 1 | 2  |
| III      | MRPS23  |   |   | 1  |
| II       | MRPS25  | 2 | 2 | 1  |
| III      | MRPS26  |   | 1 | 3  |
| II       | MRPS27  | 3 | 4 | 6  |
| III      | MRPS28  |   |   | 1  |
| II       | MRPS30  | 1 | 3 | 9  |
| III      | MRPS31  |   |   |    |
| III      | MRPS33  |   |   |    |
| II       | MRPS34  | 4 | 5 | 5  |
| III      | MRPS35  |   | 2 | 1  |
| III      | MRPS36  |   |   |    |
| III      | MRPS5   |   | 1 | 1  |
| III      | MRPS7   |   | 1 | 3  |
| III      | MRPS9   |   |   |    |
| III      | MRRF    |   | 3 | 7  |
| III      | MRS2    |   |   | 1  |
| III      | MRTO4   | 3 |   | 2  |
|          | MSANTD2 |   | 3 | 3  |
| II + III | MSANTD3 | 1 | 1 | 4  |
| II + III | MSANTD4 | 1 | 1 | 5  |
|          | MSH2    | 2 |   | 1  |
|          | MSH3    |   |   |    |
|          | MSH6    |   | 3 | 5  |
| II       | MSI2    | 1 | 1 | 2  |
| II + III | MSL1    | 3 | 8 | 10 |
| II + III | MSL2    | 2 | 4 | 18 |
| III      | MSL3    |   |   |    |
|          | MSL3P1  | 1 |   | 2  |
| III      | MSLN    | 2 |   |    |
| II + III | MSMO1   | 1 | 3 | 1  |
| II       | MSN     | 6 | 9 | 10 |
| III      | MSRA    |   |   | 1  |
| II + III | MSRB1   | 1 | 1 | 3  |

|          |         |   |   |    |
|----------|---------|---|---|----|
| III      | MSRB2   |   | 1 | 1  |
|          | MSRB3   |   | 1 | 4  |
| III      | MST4    |   | 1 | 3  |
| II       | MSX1    | 1 | 3 | 6  |
|          | MSX2    |   |   | 1  |
| III      | MT1E    |   |   |    |
| III      | MT1X    |   |   |    |
| III      | MT2A    |   |   | 2  |
| III      | MTA1    |   |   | 2  |
| III      | MTA2    |   | 1 | 4  |
| III      | MTA3    |   |   |    |
|          | MTAP    |   | 1 | 3  |
| III      | MTBP    |   |   |    |
| III      | MTCH1   |   |   | 1  |
| II       | MTCH2   | 1 | 1 | 1  |
| III      | MTCP1NB |   |   |    |
| II       | MTDH    | 2 | 8 | 11 |
|          | MTERF   |   |   |    |
|          | MTERFD1 |   |   |    |
|          | MTERFD2 |   |   | 1  |
| III      | MTERFD3 |   |   |    |
| II + III | MTF1    | 3 | 3 | 9  |
| II       | MTF2    | 1 | 1 | 3  |
| III      | MTFMT   |   |   |    |
| II       | MTFP1   | 2 | 2 | 5  |
| III      | MTFR1   |   |   | 2  |
| III      | MTG1    |   |   |    |
| III      | MTHFD1  |   | 2 | 2  |
| II       | MTHFD1L | 1 | 1 | 8  |
| III      | MTHFD2  | 2 |   | 2  |
|          | MTHFR   |   | 1 | 8  |
| II + III | MTHFSD  | 1 | 6 | 11 |
| III      | MTIF2   |   |   | 1  |
| III      | MTIF3   |   |   |    |
|          | MTM1    |   |   |    |
|          | MTMR1   |   |   | 3  |
|          | MTMR10  |   | 1 | 4  |
| III      | MTMR11  |   | 1 | 2  |
|          | MTMR12  | 1 |   | 4  |
| II       | MTMR14  | 1 | 2 | 1  |
| III      | MTMR2   |   |   |    |
|          | MTMR3   |   |   | 4  |
| II + III | MTMR4   | 1 | 4 | 13 |
|          | MTMR6   |   | 1 |    |
|          | MTMR9   |   |   |    |
|          | MTMR9LP | 1 |   |    |
|          | MTO1    | 2 |   | 2  |
|          | MTOR    |   |   | 1  |
|          | MTPAP   |   | 4 | 8  |
|          | MTR     |   | 2 | 4  |
| III      | MTRF1   |   |   | 1  |

|          |         |   |    |    |
|----------|---------|---|----|----|
| III      | MTRF1L  |   |    | 1  |
|          | MTRR    |   | 6  | 12 |
| II       | MTSS1L  | 4 | 17 | 30 |
|          | MTUS1   |   |    | 1  |
| II       | MTX1    | 1 | 1  | 2  |
| III      | MTX2    |   |    |    |
|          | MTX3    |   | 1  |    |
| III      | MUC1    |   |    | 4  |
| II + III | MUL1    | 5 | 4  | 12 |
| II + III | MUM1    | 2 | 3  | 11 |
| III      | MUS81   |   | 1  | 1  |
|          | MUT     |   |    | 1  |
| III      | MUTYH   | 1 |    |    |
| III      | MVD     |   |    | 1  |
| III      | MVK     |   | 1  | 1  |
| III      | MVP     |   |    |    |
|          | MXD1    |   | 1  |    |
| III      | MXD3    |   |    | 1  |
| II       | MXD4    | 2 | 3  | 8  |
| III      | MXI1    |   |    | 1  |
| III      | MXRA7   |   | 1  | 2  |
| II       | MYADM   | 5 | 7  | 6  |
| III      | MYBBP1A |   |    | 3  |
| III      | MYBL1   |   |    | 1  |
| II       | MYBL2   | 1 | 2  | 9  |
| II + III | MYC     | 8 | 10 | 15 |
|          | MYCBP2  |   | 1  |    |
| III      | MYEOV2  |   |    |    |
| II       | MYH10   | 1 | 1  | 1  |
| II       | MYH9    | 5 | 6  | 9  |
| III      | MYL12A  |   | 1  | 1  |
| II       | MYL12B  | 1 | 3  | 2  |
| III      | MYL5    |   |    |    |
| III      | MYL6    |   |    | 2  |
| III      | MYL6B   |   |    |    |
| III      | MYL9    |   |    |    |
|          | MYLIP   |   | 2  | 5  |
| III      | MYLK3   |   |    | 5  |
|          | MYNN    |   |    | 4  |
| II       | MYO10   | 5 | 5  | 13 |
|          | MYO19   |   |    | 3  |
|          | MYO1B   |   |    |    |
| II       | MYO1C   | 5 | 4  | 6  |
|          | MYO1D   |   |    |    |
|          | MYO1E   |   | 2  | 7  |
|          | MYO5A   |   |    | 2  |
|          | MYO6    |   |    |    |
|          | MYO9A   |   | 2  | 3  |
| II + III | MYO9B   | 5 | 9  | 22 |
|          | MYOF    |   | 1  | 3  |
| II + III | MYPN    | 2 | 2  | 5  |



|          |         |   |    |    |
|----------|---------|---|----|----|
|          | MYSM1   |   | 1  | 2  |
|          | MZF1    |   |    |    |
| III      | MZT1    |   |    |    |
| III      | MZT2A   |   |    |    |
| III      | MZT2B   |   |    |    |
|          | N4BP1   |   |    | 3  |
|          | N4BP2   |   | 2  | 5  |
|          | N4BP2L2 |   | 1  | 1  |
|          | N4BP3   |   |    | 6  |
|          | N6AMT1  |   | 1  | 1  |
| III      | N6AMT2  |   | 1  |    |
| II       | NAA10   | 2 | 2  | 2  |
| II       | NAA15   | 2 | 1  | 7  |
| III      | NAA16   |   |    | 1  |
| II       | NAA20   | 1 | 1  | 2  |
|          | NAA25   |   | 2  | 2  |
| II + III | NAA30   | 1 | 2  | 2  |
|          | NAA35   |   |    | 1  |
| III      | NAA38   |   |    | 1  |
| II + III | NAA40   | 1 | 3  | 14 |
| III      | NAA50   |   | 6  | 3  |
| II       | NAA60   | 2 | 1  | 12 |
| III      | NAAA    | 1 | 1  |    |
| II + III | NAB1    | 1 | 2  | 3  |
|          | NAB2    |   | 5  | 8  |
| II       | NACA    | 1 | 3  | 3  |
| II       | NACC1   | 3 | 14 | 33 |
| II       | NACC2   | 1 | 2  | 14 |
| III      | NADK    |   | 1  | 1  |
|          | NADKD1  |   |    | 1  |
| III      | NADSYN1 | 1 |    |    |
| III      | NAE1    |   |    |    |
|          | NAF1    |   | 1  | 1  |
|          | NAGA    |   | 4  | 3  |
| III      | NAGK    |   |    |    |
|          | NAGLU   |   | 1  | 5  |
|          | NAGPA   |   |    | 1  |
|          | NAIF1   | 1 |    | 4  |
| III      | NAMPT   |   |    |    |
|          | NANP    |   |    |    |
| III      | NANS    |   |    | 1  |
| III      | NAP1L1  |   | 1  | 1  |
| II       | NAP1L4  | 5 | 6  | 7  |
|          | NAP1L5  |   |    | 2  |
| III      | NAPA    |   |    |    |
|          | NAPEPLD |   |    |    |
| III      | NAPG    |   |    | 1  |
| III      | NAPRT1  |   |    |    |
| III      | NARF    |   |    |    |
| III      | NARFL   | 2 |    | 1  |
| II + III | NARG2   | 1 | 3  | 2  |

|          |         |    |    |    |
|----------|---------|----|----|----|
| III      | NARS    |    | 1  |    |
| III      | NARS2   |    |    |    |
| III      | NASP    |    |    |    |
|          | NAT1    |    |    | 2  |
| II       | NAT10   | 1  | 3  | 2  |
| III      | NAT14   |    |    | 2  |
|          | NAT6    |    |    |    |
| II       | NAT8L   | 5  | 9  | 12 |
| III      | NAT9    |    | 1  | 5  |
| II + III | NAV1    | 3  | 3  | 13 |
|          | NAV2    |    |    | 8  |
|          | NBAS    |    |    | 1  |
|          | NBEA    |    |    |    |
|          | NBEAL1  |    | 1  | 2  |
| III      | NBEAL2  |    |    | 1  |
| III      | NBN     |    |    | 5  |
|          | NBPF3   |    |    | 3  |
|          | NBR1    | 1  | 1  |    |
| II       | NCAPD2  | 1  | 4  | 2  |
|          | NCAPD3  |    |    | 1  |
| III      | NCAPG   |    |    | 1  |
|          | NCAPG2  |    |    |    |
| III      | NCAPH   |    |    | 1  |
| III      | NCAPH2  | 1  |    | 5  |
| II       | NCBP1   | 1  | 2  | 1  |
| III      | NCBP2   |    | 1  | 2  |
| III      | NCDN    |    |    | 4  |
| II + III | NCEH1   | 2  | 2  | 7  |
|          | NCK1    |    |    | 1  |
|          | NCK2    | 1  |    | 1  |
|          | NCKAP1  |    |    |    |
|          | NCKAP5  |    | 1  | 4  |
| II       | NCKAP5L | 3  | 7  | 15 |
| III      | NCKIPSD |    |    | 3  |
| II       | NCL     | 4  | 4  | 8  |
| II       | NCLN    | 13 | 21 | 15 |
| II + III | NCOA1   | 1  | 1  | 3  |
| II + III | NCOA2   | 1  | 1  | 8  |
| II + III | NCOA3   | 2  | 3  | 8  |
| II + III | NCOA4   | 1  | 4  | 3  |
| II       | NCOA5   | 2  | 4  | 10 |
| II       | NCOA6   | 2  | 8  | 14 |
| II + III | NCOA7   | 3  | 6  | 10 |
|          | NCOR1   |    | 4  | 10 |
| II       | NCOR2   | 6  | 5  | 15 |
| II + III | NCR3LG1 | 1  | 3  | 6  |
| III      | NCS1    |    | 4  | 6  |
| II       | NCSTN   | 1  | 1  | 4  |
| III      | NDC80   |    |    |    |
| II       | NDE1    | 3  | 2  | 6  |
| III      | NDEL1   |    | 3  | 6  |

|          |         |   |    |    |
|----------|---------|---|----|----|
| III      | NDFIP1  | 1 |    | 1  |
| III      | NDFIP2  |   |    | 1  |
| II + III | NDNL2   | 2 | 1  | 7  |
| II       | NDOR1   | 6 | 18 | 27 |
| III      | NDRG1   |   | 1  | 3  |
| III      | NDRG2   |   |    |    |
| III      | NDRG3   |   | 1  | 2  |
| II       | NDST1   | 8 | 12 | 20 |
| II + III | NDST2   | 1 | 1  | 2  |
| III      | NDUFA1  |   |    |    |
| III      | NDUFA10 |   |    | 1  |
| III      | NDUFA11 | 3 |    |    |
| II       | NDUFA12 | 1 | 2  | 2  |
| III      | NDUFA13 | 1 |    | 1  |
| II       | NDUFA2  | 1 | 1  | 1  |
| III      | NDUFA3  |   |    |    |
| III      | NDUFA4  |   |    |    |
| III      | NDUFA5  |   |    |    |
| III      | NDUFA6  |   |    | 1  |
| III      | NDUFA7  |   | 1  | 1  |
| III      | NDUFA8  |   | 1  | 1  |
| III      | NDUFA9  | 1 | 1  |    |
| III      | NDUFAB1 | 1 |    | 2  |
|          | NDUFAF1 |   |    |    |
| III      | NDUFAF2 |   |    | 1  |
| III      | NDUFAF3 | 1 |    | 2  |
| III      | NDUFAF4 |   |    |    |
| III      | NDUFB1  |   |    |    |
| III      | NDUFB10 |   | 1  |    |
| III      | NDUFB11 |   |    | 1  |
| III      | NDUFB2  |   |    |    |
| III      | NDUFB3  |   |    |    |
| II       | NDUFB4  | 1 | 1  | 2  |
| III      | NDUFB5  |   |    |    |
| III      | NDUFB6  |   | 1  | 1  |
| II       | NDUFB7  | 2 | 1  | 1  |
| III      | NDUFB8  |   |    |    |
| III      | NDUFB9  |   | 1  | 1  |
| III      | NDUFC1  |   |    | 1  |
|          | NDUFS1  |   | 2  | 1  |
| III      | NDUFS2  | 1 |    | 1  |
| III      | NDUFS3  |   | 1  |    |
| III      | NDUFS4  |   |    | 1  |
| III      | NDUFS5  |   |    |    |
| III      | NDUFS6  |   | 1  | 1  |
| III      | NDUFS7  |   |    |    |
| III      | NDUFS8  |   |    |    |
| II       | NDUFV1  | 1 | 1  | 1  |
| III      | NDUFV2  |   |    | 2  |
| II       | NDUFV3  | 1 | 1  | 2  |
| II       | NEAT1   | 7 | 14 | 12 |

|          |          |    |    |    |
|----------|----------|----|----|----|
| II       | NECAB3   | 4  | 3  | 1  |
| III      | NECAP1   | 1  |    |    |
| II + III | NECAP2   | 2  | 2  | 2  |
|          | NEDD1    |    |    |    |
|          | NEDD4    |    |    | 2  |
|          | NEDD4L   |    |    | 2  |
|          | NEDD9    |    |    |    |
| III      | NEIL2    |    |    |    |
|          | NEIL3    |    |    |    |
| III      | NEK1     |    |    |    |
| III      | NEK2     |    |    | 2  |
| III      | NEK3     |    |    |    |
|          | NEK4     |    |    | 4  |
| II       | NEK6     | 1  | 2  | 3  |
|          | NEK7     |    | 1  |    |
|          | NEK9     |    |    | 2  |
| III      | NELF     | 2  |    | 7  |
|          | NELL2    |    | 1  | 1  |
| III      | NEMF     |    |    |    |
| II       | NENF     | 2  | 2  | 3  |
| II       | NEO1     | 4  | 11 | 13 |
| III      | NES      |    |    |    |
|          | NET1     |    | 1  | 3  |
| II + III | NETO2    | 1  | 4  | 11 |
| II       | NEU1     | 8  | 6  | 10 |
| II + III | NEU3     | 2  | 6  | 11 |
| III      | NEURL    |    | 1  | 4  |
|          | NEURL1B  |    |    | 1  |
| III      | NEURL4   | 1  |    | 1  |
| III      | NEXN     |    |    | 1  |
| II + III | NF1      | 2  | 3  | 8  |
| II       | NF2      | 2  | 2  | 4  |
| II       | NFAT5    | 1  | 16 | 27 |
| II + III | NFATC1   | 1  | 3  | 4  |
| II       | NFATC2IP | 1  | 2  | 3  |
| II + III | NFATC3   | 3  | 9  | 12 |
| II + III | NFE2L1   | 14 | 35 | 36 |
| II + III | NFE2L2   | 2  | 7  | 11 |
| II + III | NFIA     | 1  | 1  | 8  |
| II       | NFIB     | 1  | 4  | 7  |
| II       | NFIC     | 13 | 17 | 32 |
| II + III | NFIL3    | 2  | 5  | 9  |
| III      | NFIX     |    | 4  | 8  |
|          | NFKB1    |    | 1  | 5  |
| III      | NFKB2    |    | 1  | 2  |
|          | NFKBIA   |    | 2  | 2  |
| III      | NFKBIB   |    |    | 1  |
|          | NFKBIE   |    |    |    |
| III      | NFKBIL1  |    |    |    |
| III      | NFKBIZ   |    |    | 1  |
|          | NFRKB    | 1  |    |    |

|          |           |   |   |    |
|----------|-----------|---|---|----|
| II       | NFS1      | 2 | 1 | 6  |
| III      | NFU1      |   |   |    |
|          | NFX1      |   | 1 | 1  |
|          | NFXL1     |   |   | 1  |
| II + III | NFYA      | 1 | 2 | 4  |
| III      | NFYB      |   | 1 | 1  |
| III      | NFYC      |   | 1 | 4  |
| III      | NGDN      |   |   | 1  |
| III      | NGFRAP1   |   |   |    |
| III      | NGLY1     |   |   | 1  |
| II       | NGRN      | 1 | 5 | 13 |
| III      | NHEJ1     |   |   | 1  |
|          | NHLRC2    |   | 1 | 7  |
| III      | NHLRC3    |   |   |    |
| III      | NHP2      |   |   | 1  |
| III      | NHP2L1    |   | 1 | 4  |
| II + III | NHS       | 1 | 2 | 9  |
| II + III | NIF3L1    | 2 | 1 | 1  |
|          | NIN       |   |   | 1  |
| II       | NINJ1     | 7 | 3 | 10 |
|          | NINL      |   |   |    |
|          | NIP7      | 1 |   | 2  |
| II + III | NIPA1     | 1 | 1 | 7  |
| II       | NIPA2     | 4 | 6 | 6  |
|          | NIPAL3    |   |   | 2  |
| II + III | NIPBL     | 3 | 4 | 19 |
| III      | NIPSNAP1  |   | 1 | 2  |
| III      | NIPSNAP3A |   |   |    |
| II       | NISCH     | 3 | 4 | 12 |
| II       | NIT1      | 1 | 2 | 3  |
| III      | NIT2      |   |   | 1  |
| III      | NKAIN1    |   | 1 | 2  |
| III      | NKAP      |   |   |    |
| II       | NKD2      | 1 | 3 | 11 |
| III      | NKIRAS1   |   |   |    |
| III      | NKIRAS2   |   |   |    |
|          | NKRF      |   | 2 | 6  |
| II       | NKTR      | 1 | 3 | 4  |
|          | NKX3-2    |   | 2 | 5  |
| III      | NLE1      | 1 |   | 2  |
| II       | NLGN2     | 7 | 6 | 17 |
|          | NLK       |   |   |    |
|          | NLN       |   | 3 | 2  |
| II + III | NLRC5     | 1 | 2 | 5  |
|          | NLRX1     |   | 1 | 5  |
| III      | NMD3      |   |   | 3  |
| III      | NME1      | 3 | 1 |    |
| III      | NME4      |   | 1 |    |
| II + III | NME6      | 1 | 2 | 6  |
| III      | NME7      |   |   |    |
| II       | NMRAL1    | 1 | 1 | 1  |

|          |          |    |    |    |
|----------|----------|----|----|----|
| III      | NMRK1    |    |    |    |
| II       | NMT1     | 2  | 5  | 17 |
| III      | NMT2     |    |    |    |
| II       | NNMT     | 1  | 2  | 3  |
|          | NNT      |    |    | 1  |
| II + III | NOA1     | 2  | 2  | 2  |
| II       | NOB1     | 3  | 1  | 3  |
| II       | NOC2L    | 1  | 3  | 3  |
| II       | NOC3L    | 2  | 1  | 3  |
| III      | NOC4L    |    |    |    |
| II + III | NOD1     | 1  | 1  | 4  |
|          | NOG      |    | 1  | 3  |
| III      | NOL10    |    |    | 3  |
|          | NOL11    | 1  |    | 2  |
| III      | NOL12    |    |    | 2  |
| III      | NOL3     |    | 2  |    |
| II       | NOL6     | 4  | 5  | 5  |
| III      | NOL7     |    |    |    |
| III      | NOL8     |    | 1  | 8  |
| II       | NOL9     | 3  | 4  | 7  |
| III      | NOLC1    |    | 2  | 3  |
|          | NOM1     |    | 1  | 2  |
| II       | NOMO1    | 5  | 1  | 1  |
|          | NOMO2    |    |    | 3  |
| II       | NOMO3    | 2  | 3  | 3  |
| II       | NONO     | 2  | 6  | 10 |
| II       | NOP10    | 3  | 3  | 4  |
| III      | NOP14    |    | 1  | 4  |
| II       | NOP16    | 1  | 1  | 2  |
| II       | NOP2     | 1  | 6  | 4  |
| III      | NOP56    |    | 1  | 4  |
| III      | NOP58    |    | 1  | 1  |
| III      | NOSIP    |    |    |    |
| II + III | NOTCH1   | 5  | 4  | 11 |
| II + III | NOTCH2   | 19 | 24 | 40 |
|          | NOTCH2NL |    |    | 1  |
| III      | NOV      |    | 1  |    |
| III      | NPAS2    |    | 3  | 4  |
|          | NPAT     |    | 5  | 7  |
| II       | NPC1     | 2  | 3  | 5  |
| III      | NPC2     |    | 1  | 1  |
| II       | NPDC1    | 4  | 2  | 3  |
|          | NPEPPS   |    | 1  | 4  |
| III      | NPHP4    |    |    |    |
| III      | NPL      |    |    | 2  |
| II       | NPLOC4   | 8  | 14 | 19 |
| III      | NPM1     |    | 4  | 6  |
| III      | NPM3     | 1  | 1  |    |
| II       | NPR3     | 9  | 7  | 15 |
| III      | NPRL2    |    |    |    |
| II       | NPRL3    | 1  | 1  | 2  |

|          |         |    |    |    |
|----------|---------|----|----|----|
| II       | NPTN    | 1  | 3  | 6  |
| II + III | NPTX1   | 12 | 16 | 24 |
| III      | NPTXR   |    | 2  | 1  |
| III      | NQO1    | 1  |    | 5  |
| III      | NQO2    |    | 1  | 1  |
| III      | NR1D1   |    | 1  | 5  |
|          | NR1D2   |    |    | 5  |
| III      | NR1H2   |    |    |    |
| III      | NR1H3   |    | 1  | 2  |
| III      | NR2C1   |    | 2  |    |
|          | NR2C2   |    | 1  | 4  |
| III      | NR2C2AP |    |    | 1  |
| II + III | NR2F1   | 1  | 4  | 4  |
| II + III | NR2F2   | 3  | 2  | 5  |
| II       | NR2F6   | 5  | 5  | 10 |
| II + III | NR3C1   | 3  | 10 | 19 |
|          | NR3C2   |    |    | 2  |
| II       | NR4A1   | 1  | 2  | 9  |
|          | NR4A2   |    |    |    |
|          | NR4A3   | 1  |    | 5  |
|          | NRARP   |    | 2  | 4  |
|          | NRAS    |    | 6  | 7  |
| III      | NRBP1   |    | 2  | 5  |
| III      | NRBP2   |    | 1  |    |
|          | NRCAM   |    |    |    |
| II       | NRD1    | 2  | 3  | 3  |
| III      | NREP    |    |    | 1  |
| II + III | NRF1    | 1  | 5  | 8  |
| III      | NRG4    |    | 1  |    |
| III      | NRGN    |    | 1  | 1  |
|          | NRIP1   | 1  |    | 10 |
| II       | NRM     | 2  | 5  | 5  |
| II + III | NRP1    | 1  | 1  | 4  |
| III      | NRSN2   |    |    | 4  |
| III      | NSA2    |    | 2  | 2  |
| II + III | NSD1    | 4  | 5  | 19 |
|          | NSDHL   |    | 2  | 4  |
|          | NSF     |    |    | 2  |
| III      | NSFL1C  |    |    | 1  |
|          | NSFP1   |    | 1  |    |
| III      | NSL1    | 1  |    | 1  |
| III      | NSMAF   |    |    | 1  |
| III      | NSMCE1  |    |    |    |
| III      | NSMCE2  |    |    | 3  |
| III      | NSMCE4A |    |    |    |
| III      | NSRP1   |    | 1  |    |
| II + III | NSUN2   | 1  | 7  | 4  |
|          | NSUN3   |    |    |    |
| II       | NSUN4   | 1  | 1  | 3  |
| III      | NSUN5   |    |    |    |
|          | NSUN6   |    |    | 1  |

|          |          |   |    |    |
|----------|----------|---|----|----|
| III      | NT5C     |   |    |    |
| II       | NT5C2    | 2 | 1  | 3  |
| III      | NT5C3    |   | 1  | 2  |
| II       | NT5C3L   | 2 | 3  | 6  |
| III      | NT5DC1   |   |    | 1  |
| II       | NT5DC2   | 2 | 2  | 2  |
|          | NT5DC3   |   |    | 8  |
|          | NT5E     |   |    |    |
| III      | NT5M     |   |    |    |
| III      | NTAN1    |   |    |    |
| III      | NTHL1    | 1 |    |    |
| II       | NTN1     | 1 | 5  | 4  |
|          | NTN4     |   |    | 1  |
| III      | NTPCR    |   | 1  |    |
| II + III | NTSR1    | 6 | 8  | 19 |
| II + III | NUAK1    | 3 | 7  | 21 |
| II + III | NUAK2    | 6 | 7  | 13 |
| III      | NUB1     |   |    |    |
| III      | NUBP1    |   |    |    |
| III      | NUBP2    |   |    | 1  |
| III      | NUBPL    |   |    |    |
| II       | NUCB1    | 5 | 6  | 4  |
| III      | NUCB2    |   |    | 1  |
| II       | NUCKS1   | 2 | 10 | 14 |
| III      | NUDC     |   | 2  | 2  |
| III      | NUDCD1   | 1 |    | 1  |
| III      | NUDCD2   |   |    |    |
| II + III | NUDCD3   | 6 | 11 | 17 |
| III      | NUDT1    | 1 | 1  |    |
|          | NUDT12   |   |    | 1  |
| III      | NUDT13   |   |    |    |
| III      | NUDT14   |   |    |    |
| III      | NUDT15   |   |    |    |
|          | NUDT16   |   | 1  | 2  |
| III      | NUDT16L1 |   |    | 2  |
|          | NUDT18   |   |    |    |
| II       | NUDT19   | 2 | 1  | 2  |
| III      | NUDT2    |   |    |    |
| III      | NUDT21   |   | 1  | 1  |
| III      | NUDT22   |   | 1  | 3  |
| III      | NUDT5    |   |    |    |
|          | NUDT7    |   |    |    |
| III      | NUDT8    |   |    |    |
| III      | NUDT9    |   |    |    |
| III      | NUF2     |   |    |    |
| III      | NUFIP1   |   |    |    |
| II + III | NUFIP2   | 5 | 17 | 27 |
| III      | NUMA1    |   | 1  | 2  |
| III      | NUMB     |   | 1  | 1  |
|          | NUMBL    |   | 1  | 4  |
| II       | NUP107   | 1 | 1  | 5  |



|          |         |    |    |    |
|----------|---------|----|----|----|
|          | NUP133  |    |    |    |
| II + III | NUP153  | 5  | 13 | 21 |
| II + III | NUP155  | 2  | 4  | 3  |
|          | NUP160  |    | 4  | 3  |
| II       | NUP188  | 1  | 2  | 6  |
|          | NUP205  | 1  | 1  |    |
| II       | NUP210  | 3  | 6  | 9  |
| II       | NUP214  | 3  | 3  | 13 |
| III      | NUP35   |    |    |    |
| III      | NUP37   |    |    | 1  |
| III      | NUP43   |    |    | 3  |
| II + III | NUP50   | 4  | 6  | 12 |
| III      | NUP54   |    | 1  |    |
| II + III | NUP62   | 12 | 8  | 22 |
| III      | NUP62CL |    |    |    |
| III      | NUP85   |    | 2  | 1  |
| III      | NUP88   |    | 1  | 2  |
| III      | NUP93   |    | 1  |    |
| II + III | NUP98   | 2  | 7  | 8  |
| II       | NUPL1   | 1  | 1  | 1  |
|          | NUPL2   |    | 2  | 6  |
| III      | NUPR1   |    | 1  | 3  |
| II       | NUSAP1  | 1  | 3  | 4  |
| II       | NUTF2   | 1  | 4  | 5  |
| III      | NVL     |    |    | 1  |
| II       | NXF1    | 2  | 2  | 3  |
| II + III | NXN     | 3  | 3  | 9  |
| II       | NXPH4   | 4  | 6  | 5  |
|          | NXT1    |    | 1  | 1  |
| III      | NXT2    |    |    |    |
| II       | OAF     | 1  | 2  | 2  |
| III      | OAS3    |    |    |    |
| III      | OAT     |    | 1  | 1  |
| II       | OAZ1    | 2  | 1  | 1  |
| II       | OAZ2    | 1  | 2  | 5  |
| II       | OBSCN   | 4  | 2  | 10 |
| III      | OBSL1   | 1  |    |    |
| III      | OCEL1   |    |    | 1  |
| III      | OCIAD1  |    | 3  | 5  |
| III      | OCIAD2  |    |    |    |
|          | OCRL    | 1  |    |    |
| II       | ODC1    | 4  | 3  | 4  |
| III      | ODF2    |    |    | 1  |
| III      | ODF2L   |    |    |    |
|          | ODZ3    |    | 1  | 4  |
| III      | OFD1    |    | 2  | 4  |
| II + III | OGDH    | 3  | 3  | 10 |
| III      | OGDHL   |    |    |    |
|          | OGFOD1  |    | 2  | 4  |
| III      | OGFOD2  |    |    |    |
| II       | OGFR    | 4  | 2  | 8  |

|          |         |    |    |    |
|----------|---------|----|----|----|
|          | OGFRL1  |    | 1  | 1  |
| III      | OGG1    |    | 1  | 1  |
| II + III | OGT     | 2  | 14 | 21 |
| III      | OIP5    |    |    |    |
| III      | OLA1    |    |    |    |
| II + III | OLFM1   | 13 | 16 | 19 |
| II       | OLFM2   | 2  | 2  | 4  |
|          | OLFML1  |    | 2  | 2  |
| II       | OLFML2A | 2  | 1  | 2  |
|          | OLFML2B |    |    | 1  |
| II       | OLR1    | 1  | 2  | 3  |
| III      | OMA1    |    |    |    |
|          | OPA1    |    |    | 1  |
| III      | OPLAH   |    |    |    |
| II + III | OPN3    | 1  | 4  | 4  |
| III      | OPTN    |    |    |    |
| II       | ORAI1   | 2  | 2  | 6  |
| II + III | ORAI2   | 5  | 2  | 9  |
| III      | ORAI3   |    |    | 1  |
| III      | ORAOV1  |    |    | 1  |
|          | ORC1    |    | 3  | 2  |
| III      | ORC2    |    |    |    |
| III      | ORC3    |    |    | 1  |
|          | ORC4    |    |    | 2  |
|          | ORC5    |    |    | 3  |
| III      | ORC6    |    |    | 2  |
| III      | ORMDL1  |    |    | 1  |
| III      | ORMDL2  |    |    | 1  |
| II       | ORMDL3  | 2  | 2  | 2  |
| II       | OS9     | 2  | 6  | 8  |
| II + III | OSBP    | 1  | 2  | 11 |
| III      | OSBP2   | 1  |    | 2  |
|          | OSBPL10 |    | 1  | 6  |
|          | OSBPL11 |    | 2  | 2  |
| III      | OSBPL1A |    |    |    |
| II + III | OSBPL2  | 1  | 3  | 5  |
|          | OSBPL3  |    |    | 1  |
| III      | OSBPL5  |    |    |    |
|          | OSBPL6  |    |    |    |
|          | OSBPL8  |    | 1  | 2  |
| III      | OSBPL9  |    | 1  | 3  |
| III      | OSCP1   |    |    |    |
| III      | OSGEP   |    |    | 1  |
|          | OSGEPL1 |    |    |    |
|          | OSGIN1  | 1  |    | 9  |
|          | OSGIN2  |    | 1  | 1  |
|          | OSMR    |    | 7  | 14 |
|          | OSR2    |    |    | 4  |
| III      | OST4    |    | 1  | 3  |
| III      | OSTC    |    | 1  | 1  |
| III      | OSTF1   |    |    |    |

|          |          |   |    |    |
|----------|----------|---|----|----|
| III      | OSTM1    |   | 2  | 2  |
| III      | OTUB1    | 1 |    | 2  |
|          | OTUD1    |   |    | 3  |
| II       | OTUD3    | 1 | 1  | 1  |
| II + III | OTUD4    | 1 | 4  | 8  |
| III      | OTUD5    |   | 2  | 7  |
| III      | OTUD6B   |   |    | 1  |
| II       | OTUD7B   | 5 | 2  | 9  |
| III      | OXA1L    |   | 3  | 5  |
| III      | OXCT1    |   |    | 1  |
|          | OXNAD1   |   | 1  |    |
|          | OXR1     |   |    | 2  |
|          | OXSM     |   | 1  | 1  |
| II + III | OXSR1    | 3 | 1  | 10 |
| III      | P2RX4    |   |    |    |
| II + III | P2RY6    | 6 | 3  | 4  |
| III      | P4HA1    |   |    |    |
| III      | P4HA2    |   |    |    |
| II       | P4HB     | 6 | 18 | 13 |
| III      | P4HTM    | 1 |    | 2  |
| II       | PA2G4    | 1 | 4  | 7  |
|          | PAAF1    |   |    | 1  |
| II       | PABPC1   | 3 | 5  | 4  |
| II       | PABPC4   | 1 | 2  | 3  |
| III      | PACRGL   |   |    |    |
| III      | PACS1    |   | 2  | 3  |
|          | PACS2    |   |    | 4  |
| II       | PACSIN2  | 1 | 1  | 1  |
| III      | PACSIN3  |   |    | 1  |
| III      | PAF1     |   | 1  | 1  |
|          | PAFAH1B1 |   | 3  | 9  |
|          | PAFAH1B2 |   | 1  | 6  |
| III      | PAFAH1B3 |   |    |    |
|          | PAFAH2   |   | 3  | 7  |
| III      | PAGE1    |   |    | 1  |
| III      | PAICS    |   | 4  | 5  |
| III      | PAIP1    |   | 2  | 3  |
| II       | PAIP2    | 1 | 1  | 1  |
| III      | PAIP2B   |   |    |    |
| III      | PAK1     |   |    |    |
| III      | PAK1IP1  |   |    |    |
| II       | PAK2     | 1 | 4  | 6  |
| III      | PAK4     |   |    | 1  |
|          | PALB2    |   | 1  | 14 |
| III      | PALLD    |   |    |    |
| III      | PALM     |   | 1  | 2  |
|          | PAM      |   |    | 3  |
|          | PAN2     |   |    | 2  |
|          | PAN3     |   |    | 4  |
|          | PANK1    |   |    |    |
|          | PANK2    |   |    | 2  |

|          |        |   |   |    |
|----------|--------|---|---|----|
|          | PANK3  |   | 2 | 7  |
|          | PANK4  |   |   |    |
| II + III | PANX1  | 1 | 1 | 4  |
| III      | PAPD4  |   |   | 4  |
| II       | PAPD5  | 6 | 4 | 11 |
| II + III | PAPD7  | 2 | 8 | 16 |
| III      | PAPOLA |   | 2 | 3  |
| III      | PAPOLG |   | 1 |    |
|          | PAPPA  |   |   | 2  |
| III      | PAPSS1 | 1 |   | 1  |
|          | PAPSS2 |   |   | 3  |
| III      | PAQR3  |   |   |    |
| II + III | PAQR4  | 5 | 8 | 15 |
| II       | PAQR5  | 1 | 1 | 1  |
| II       | PAQR7  | 1 | 3 | 4  |
|          | PARD3  | 1 |   | 2  |
|          | PARD6A |   |   |    |
|          | PARD6G |   |   | 3  |
|          | PARG   |   |   | 2  |
| III      | PARK7  | 1 |   |    |
| III      | PARL   | 1 |   |    |
| III      | PARN   |   |   | 2  |
| III      | PARP1  |   | 1 | 4  |
| III      | PARP12 |   |   | 3  |
|          | PARP14 |   |   |    |
| III      | PARP16 |   |   | 3  |
| III      | PARP2  |   |   |    |
| III      | PARP3  |   |   |    |
|          | PARP4  |   |   |    |
| III      | PARP6  |   | 1 | 2  |
|          | PARP8  | 1 |   | 2  |
|          | PARP9  |   |   | 2  |
| III      | PARPBP |   | 1 | 2  |
|          | PARS2  |   | 1 | 1  |
| III      | PARVA  |   |   | 6  |
| II       | PARVB  | 1 | 1 | 3  |
| II       | PASD1  | 1 | 3 | 6  |
|          | PASK   |   |   | 1  |
| II       | PATL1  | 1 | 2 | 5  |
| II + III | PATZ1  | 6 | 7 | 17 |
| III      | PAWR   |   |   | 1  |
|          | PAX9   |   |   | 3  |
|          | PAXIP1 |   | 2 | 1  |
|          | PBK    |   | 2 | 2  |
| III      | PBLD   |   |   |    |
|          | PBRM1  |   | 2 | 5  |
| III      | PBX1   | 1 |   | 3  |
| III      | PBX3   |   | 1 | 2  |
| III      | PBXIP1 |   |   |    |
| III      | PC     |   |   |    |
| III      | PCBD1  |   | 1 | 1  |

|          |         |    |    |    |
|----------|---------|----|----|----|
| III      | PCBD2   |    | 2  | 2  |
| II + III | PCBP1   | 7  | 7  | 11 |
| II       | PCBP2   | 5  | 11 | 12 |
| III      | PCBP4   |    |    |    |
| III      | PCCA    |    |    |    |
| III      | PCCB    |    | 1  | 1  |
| II + III | PCF11   | 1  | 2  | 12 |
| III      | PCGF1   |    |    |    |
| III      | PCGF2   |    |    |    |
| II + III | PCGF3   | 1  | 2  | 4  |
|          | PCGF5   |    | 1  | 3  |
| III      | PCGF6   |    |    |    |
| II       | PCID2   | 2  | 2  | 8  |
| III      | PCIF1   |    |    | 1  |
| III      | PCK2    |    |    |    |
| III      | PCM1    |    |    | 1  |
| III      | PCMT1   |    | 1  | 2  |
|          | PCMTD1  |    |    |    |
|          | PCMTD2  |    | 1  | 7  |
| III      | PCNA    |    | 2  | 1  |
| III      | PCNP    |    |    | 3  |
| III      | PCNT    |    |    | 1  |
| II + III | PCNX    | 5  | 6  | 10 |
| II + III | PCNXL3  | 10 | 13 | 36 |
| II       | PCOLCE  | 1  | 1  | 1  |
|          | PCOLCE2 |    |    | 1  |
| II       | PCSK7   | 3  | 2  | 5  |
| II       | PCSK9   | 2  | 4  | 11 |
|          | PCTP    |    |    | 2  |
| II + III | PCYOX1  | 2  | 6  | 8  |
|          | PCYOX1L |    |    |    |
|          | PCYT1A  |    |    |    |
| II       | PCYT2   | 3  | 1  | 4  |
| III      | PDAP1   |    |    |    |
| III      | PDCD10  |    |    | 1  |
| II       | PDCD11  | 3  | 3  | 4  |
| III      | PDCD2   |    |    | 1  |
| III      | PDCD2L  | 1  |    | 1  |
| III      | PDCD4   |    | 1  | 1  |
| III      | PDCD5   |    |    |    |
| II       | PDCD6IP | 1  | 1  | 1  |
| III      | PDCD7   |    |    | 1  |
|          | PDCL    |    |    |    |
| III      | PDCL3   |    |    |    |
| III      | PDDC1   |    |    | 1  |
|          | PDE10A  |    | 1  | 2  |
| II + III | PDE12   | 3  | 6  | 9  |
|          | PDE3A   |    | 2  | 4  |
|          | PDE3B   |    | 3  | 7  |
|          | PDE4A   |    | 4  | 10 |
| II + III | PDE4D   | 2  | 4  | 11 |

|          |         |    |    |    |
|----------|---------|----|----|----|
|          | PDE4DIP |    |    | 3  |
| III      | PDE6D   |    |    |    |
|          | PDE7A   |    | 2  | 7  |
|          | PDE7B   |    |    |    |
|          | PDE8A   |    | 3  | 3  |
|          | PDE8B   |    |    |    |
| II + III | PDF     | 2  | 4  | 4  |
| II + III | PDGFA   | 4  | 1  | 2  |
| II       | PDGFB   | 5  | 5  | 9  |
| II       | PDGFRB  | 2  | 2  | 1  |
| III      | PDHA1   | 1  | 1  |    |
| III      | PDHB    |    | 1  |    |
| III      | PDHX    |    |    |    |
| II       | PDIA3   | 2  | 8  | 4  |
| II       | PDIA4   | 3  | 3  | 4  |
| III      | PDIA5   |    | 1  |    |
| II       | PDIA6   | 1  | 5  | 3  |
|          | PDIK1L  |    | 1  | 2  |
|          | PDK1    |    |    |    |
| III      | PDK2    |    |    | 2  |
|          | PDK3    |    | 1  | 1  |
|          | PDK4    |    |    |    |
| III      | PDLIM1  |    |    |    |
| III      | PDLIM2  |    |    | 2  |
| III      | PDLIM3  |    |    |    |
|          | PDLIM5  |    | 1  | 1  |
| III      | PDLIM7  | 1  |    |    |
|          | PDP1    |    | 2  | 4  |
| II + III | PDP2    | 2  | 2  | 7  |
| II + III | PDPK1   | 1  | 3  | 10 |
| II       | PDRG1   | 3  | 5  | 6  |
|          | PDS5A   |    | 5  | 5  |
|          | PDS5B   |    | 1  | 2  |
| III      | PDSS1   |    |    |    |
| III      | PDSS2   |    |    |    |
| II       | PDXDC1  | 1  | 1  | 1  |
|          | PDXDC2P |    | 1  | 1  |
| II       | PDXK    | 6  | 8  | 22 |
| II       | PDXP    | 1  | 1  | 3  |
| III      | PDZD11  |    |    | 1  |
|          | PDZD4   |    |    | 2  |
|          | PDZD8   |    | 1  | 7  |
| II       | PEA15   | 4  | 4  | 10 |
| II + III | PEAK1   | 1  | 1  | 8  |
| II       | PEBP1   | 1  | 1  | 2  |
| III      | PECR    |    |    |    |
| III      | PEF1    | 1  |    | 5  |
| II + III | PEG10   | 11 | 18 | 40 |
|          | PEL11   |    |    |    |
| III      | PEL13   |    |    | 3  |
|          | PELO    |    | 3  | 5  |

|          |        |   |   |    |
|----------|--------|---|---|----|
| II       | PELP1  | 5 | 5 | 5  |
| III      | PEMT   |   | 3 | 5  |
| III      | PEPD   |   |   | 1  |
| II       | PER1   | 1 | 3 | 9  |
|          | PER3   |   |   |    |
| II       | PERP   | 3 | 6 | 10 |
| III      | PES1   | 1 |   | 2  |
| III      | PET112 |   |   |    |
|          | PET117 |   |   |    |
|          | PEX1   |   |   |    |
| III      | PEX10  |   | 1 | 3  |
|          | PEX11A |   | 1 | 1  |
|          | PEX11B |   | 2 | 4  |
|          | PEX12  | 2 |   | 3  |
| II + III | PEX13  | 1 | 1 | 1  |
| III      | PEX14  |   | 2 |    |
| III      | PEX16  |   | 1 | 1  |
| III      | PEX19  |   | 2 | 4  |
|          | PEX2   |   |   |    |
| II       | PEX26  | 2 | 1 | 11 |
| III      | PEX3   |   |   |    |
| III      | PEX5   |   |   | 1  |
| III      | PEX6   |   |   |    |
| III      | PEX7   |   |   |    |
|          | PFAS   |   | 4 | 4  |
| III      | PFDN1  |   |   | 3  |
| III      | PFDN2  |   |   |    |
| III      | PFDN4  |   |   |    |
| III      | PFDN5  |   |   |    |
| III      | PFDN6  |   |   |    |
|          | PFKFB2 |   | 2 | 2  |
| II + III | PFKFB3 | 3 | 6 | 13 |
| II       | PFKFB4 | 2 | 1 | 2  |
| II       | PFKL   | 1 | 1 | 2  |
| III      | PFKM   |   |   | 1  |
| II       | PFKP   | 4 | 4 | 10 |
| II       | PFN1   | 3 | 4 | 4  |
| III      | PFN2   |   | 1 | 1  |
| III      | PGAM5  |   | 7 | 12 |
| II       | PGAP2  | 1 | 1 | 2  |
| II + III | PGBD1  | 2 | 3 | 4  |
|          | PGBD2  |   | 1 | 2  |
| II       | PGD    | 1 | 1 | 2  |
|          | PGGT1B |   |   |    |
| II       | PGK1   | 1 | 2 | 3  |
| III      | PGLS   | 1 |   | 2  |
| III      | PGM1   |   |   |    |
|          | PGM2   |   |   |    |
|          | PGM2L1 |   |   |    |
|          | PGM3   |   | 1 | 8  |
| II       | PGP    | 2 | 1 | 2  |

|          |         |    |    |    |
|----------|---------|----|----|----|
|          | PGPEP1  |    | 1  | 3  |
| III      | PGRMC1  | 1  |    | 1  |
| II       | PGRMC2  | 4  | 4  | 9  |
|          | PGS1    |    | 1  | 1  |
|          | PHACTR2 | 1  |    | 2  |
| II       | PHACTR4 | 1  | 2  | 5  |
| III      | PHAX    |    | 2  | 2  |
| II       | PHB     | 2  | 2  | 8  |
| II       | PHB2    | 1  | 5  | 5  |
| III      | PHC2    |    | 3  | 5  |
|          | PHC3    |    | 2  |    |
| III      | PHF1    |    |    | 1  |
| III      | PHF10   |    |    | 1  |
| II + III | PHF12   | 1  | 3  | 6  |
|          | PHF13   |    | 2  | 1  |
| II       | PHF14   | 1  | 1  | 4  |
| II + III | PHF15   | 10 | 12 | 31 |
|          | PHF16   |    |    | 1  |
| II + III | PHF17   | 1  | 3  | 3  |
| II       | PHF19   | 1  | 2  | 10 |
|          | PHF2    |    | 1  | 2  |
| II + III | PHF20   | 1  | 5  | 12 |
| III      | PHF20L1 |    | 1  | 3  |
|          | PHF21A  |    | 2  | 7  |
| II + III | PHF23   | 1  | 3  | 16 |
|          | PHF3    |    | 1  | 6  |
| II       | PHF5A   | 1  | 2  | 4  |
| III      | PHF6    |    |    | 4  |
|          | PHF7    |    |    |    |
| II       | PHF8    | 1  | 3  | 13 |
| II       | PHGDH   | 4  | 3  | 6  |
|          | PHIP    | 1  |    | 2  |
|          | PHKA1   |    |    | 1  |
|          | PHKA2   |    |    |    |
| II + III | PHKB    | 1  | 1  | 1  |
|          | PHKG2   |    | 2  | 4  |
| III      | PHLDA2  |    |    |    |
|          | PHLDA3  |    |    | 4  |
| II       | PHLDB1  | 3  | 6  | 4  |
| II + III | PHLDB2  | 6  | 8  | 12 |
| III      | PHLDB3  |    |    | 1  |
|          | PHLPP1  |    | 1  | 5  |
| II + III | PHLPP2  | 2  | 2  | 8  |
| III      | PHPT1   |    |    | 1  |
| II       | PHRF1   | 1  | 1  | 1  |
| III      | PHTF1   |    |    | 2  |
|          | PHTF2   |    |    |    |
| III      | PHYH    |    |    | 1  |
|          | PHYHIP  |    |    | 1  |
| III      | PI4K2A  |    | 1  | 4  |
|          | PI4K2B  |    |    |    |



|          |         |    |    |    |
|----------|---------|----|----|----|
| III      | PI4KA   |    |    | 1  |
| III      | PI4KAP2 |    |    |    |
| II + III | PI4KB   | 2  | 1  | 9  |
| II + III | PIAS1   | 1  | 2  | 8  |
|          | PIAS2   |    | 1  | 2  |
| III      | PIAS3   |    |    | 2  |
| II       | PIAS4   | 1  | 2  | 5  |
| III      | PIBF1   |    | 2  | 1  |
| III      | PICALM  |    | 3  | 4  |
| III      | PICK1   |    | 1  | 3  |
| III      | PIDD    |    |    |    |
| II       | PIEZO1  | 10 | 11 | 20 |
| II       | PIF1    | 1  | 1  | 1  |
|          | PIGA    | 2  |    | 3  |
| III      | PIGB    |    |    |    |
|          | PIGC    |    |    | 1  |
| III      | PIGF    |    |    |    |
|          | PIGG    |    | 1  | 8  |
| III      | PIGH    |    |    |    |
| III      | PIGK    |    |    |    |
|          | PIGL    | 1  | 1  |    |
| II + III | PIGM    | 3  | 4  | 5  |
|          | PIGN    |    |    | 1  |
| II       | PIGO    | 2  | 3  | 5  |
| III      | PIGP    |    |    | 1  |
| II       | PIGQ    | 4  | 5  | 3  |
| II       | PIGS    | 2  | 8  | 10 |
| II       | PIGT    | 5  | 4  | 5  |
| III      | PIGU    |    |    |    |
| II + III | PIGV    | 1  | 1  | 3  |
|          | PIGW    |    | 2  | 1  |
| III      | PIGX    |    |    |    |
| II       | PIGY    | 1  | 1  | 1  |
| III      | PIH1D1  |    | 1  | 2  |
|          | PIK3C2A |    |    | 2  |
| II + III | PIK3C2B | 2  | 4  | 6  |
| III      | PIK3C3  |    |    | 1  |
|          | PIK3CA  |    |    | 1  |
| II + III | PIK3CB  | 1  | 2  | 5  |
|          | PIK3CD  | 2  |    | 4  |
| II       | PIK3R2  | 1  | 1  | 4  |
|          | PIK3R3  |    |    |    |
| II + III | PIK3R4  | 2  | 4  | 6  |
|          | PIKFYVE |    |    |    |
| II       | PILRB   | 1  | 1  | 2  |
| III      | PIM1    |    |    | 3  |
| II       | PIM2    | 1  | 1  | 4  |
| II       | PIM3    | 9  | 8  | 9  |
| III      | PIN1    |    | 1  |    |
| III      | PIN4    |    |    | 1  |
| III      | PINK1   |    |    | 2  |

|          |          |    |    |    |
|----------|----------|----|----|----|
| III      | PINX1    |    |    |    |
| III      | PIP4K2A  |    | 1  | 3  |
| II + III | PIP4K2B  | 4  | 5  | 12 |
| II + III | PIP4K2C  | 1  | 6  | 11 |
| II       | PIP5K1A  | 5  | 11 | 14 |
|          | PIP5K1B  |    |    | 2  |
| II + III | PIP5K1C  | 11 | 15 | 31 |
| III      | PIR      |    |    | 2  |
| II + III | PISD     | 3  | 2  | 6  |
| III      | PITHD1   |    |    |    |
| III      | PITPNA   |    | 3  | 4  |
| II       | PITPNB   | 1  | 1  | 1  |
| III      | PITPNC1  |    |    |    |
| III      | PITPNM1  |    | 1  |    |
|          | PITRM1   | 1  |    | 5  |
| II + III | PITX1    | 6  | 12 | 16 |
|          | PJA1     |    |    | 1  |
| III      | PJA2     |    | 1  | 2  |
| II       | PKD1     | 2  | 6  | 15 |
|          | PKD2     |    |    | 1  |
| III      | PKDCC    |    |    | 1  |
| III      | PKIG     |    |    |    |
| II       | PKMYT1   | 2  | 4  | 6  |
| III      | PKN1     |    |    |    |
| II       | PKN2     | 1  | 2  | 3  |
| III      | PKN3     |    | 2  | 5  |
|          | PKNOX1   |    |    |    |
|          | PKP2     |    |    | 1  |
| III      | PKP3     |    |    |    |
|          | PKP4     |    |    | 4  |
|          | PLA2G12A |    | 1  |    |
| II + III | PLA2G15  | 3  | 13 | 10 |
| III      | PLA2G16  | 1  |    |    |
|          | PLA2G4A  |    |    |    |
| III      | PLA2G6   |    |    |    |
|          | PLAA     |    |    | 1  |
| II + III | PLAC2    | 5  | 10 | 11 |
| II + III | PLAGL1   | 3  | 3  | 8  |
|          | PLAUR    |    | 1  | 1  |
| II       | PLBD2    | 2  | 1  | 5  |
| III      | PLCB3    |    |    |    |
|          | PLCB4    |    | 4  | 2  |
| II       | PLCD3    | 1  | 2  | 9  |
| II       | PLCG1    | 1  | 1  | 4  |
|          | PLCG2    |    |    | 1  |
|          | PLCL2    | 1  |    | 4  |
|          | PLD1     |    |    |    |
| III      | PLD2     |    | 1  |    |
| II       | PLD3     | 1  | 3  | 1  |
|          | PLD6     | 1  |    | 2  |
| III      | PLDN     |    |    | 1  |

|          |         |    |    |    |
|----------|---------|----|----|----|
| II       | PLEC    | 32 | 25 | 40 |
| III      | PLEK2   |    |    |    |
|          | PLEKHA1 |    |    | 1  |
| II       | PLEKHA2 | 1  | 1  | 5  |
| III      | PLEKHA5 |    |    | 3  |
|          | PLEKHA7 |    |    | 3  |
|          | PLEKHB2 |    |    |    |
| II + III | PLEKHF2 | 1  | 1  | 6  |
|          | PLEKHG2 |    |    | 4  |
|          | PLEKHG3 | 3  |    | 4  |
| III      | PLEKHG4 | 1  |    | 3  |
| II       | PLEKHH3 | 3  | 8  | 9  |
| III      | PLEKHJ1 |    |    |    |
|          | PLEKHM2 |    | 1  | 5  |
|          | PLEKHO2 |    |    | 4  |
| III      | PLGRKT  |    |    |    |
| III      | PLIN3   |    | 2  | 1  |
| II       | PLK1    | 2  | 3  | 5  |
| III      | PLK1S1  |    |    | 1  |
|          | PLK2    |    |    |    |
| III      | PLK3    |    |    |    |
|          | PLK4    |    | 2  | 5  |
| II       | PLLP    | 1  | 2  | 3  |
| II       | PLOD1   | 7  | 7  | 13 |
|          | PLOD2   |    |    |    |
| II       | PLOD3   | 2  | 5  | 3  |
| II       | PLP2    | 3  | 9  | 7  |
| III      | PLRG1   |    |    |    |
| III      | PLS1    |    |    |    |
|          | PLS3    |    |    |    |
| III      | PLSCR1  |    |    | 1  |
| II       | PLTP    | 1  | 2  | 3  |
| II       | PLXNA1  | 1  | 6  | 12 |
|          | PLXNA3  |    |    | 5  |
| III      | PLXNB1  | 1  |    | 3  |
| II       | PLXNB2  | 4  | 4  | 7  |
| II       | PLXND1  | 6  | 3  | 11 |
|          | PM20D2  |    |    |    |
|          | PMAIP1  |    | 1  | 6  |
| II       | PMEPA1  | 3  | 9  | 14 |
| II       | PMF1    | 1  | 1  | 1  |
| III      | PMM1    |    |    |    |
| II + III | PMM2    | 2  | 6  | 10 |
| II       | PMP22   | 2  | 10 | 7  |
| II       | PMPCA   | 3  | 2  | 3  |
| III      | PMPCB   |    |    |    |
|          | PMS1    |    | 1  | 2  |
|          | PMS2    | 2  |    | 2  |
| III      | PMS2P1  |    |    |    |
|          | PMS2P4  |    |    | 2  |
| III      | PMVK    |    | 1  | 1  |

|          |         |    |    |    |
|----------|---------|----|----|----|
| III      | PNISR   |    | 2  | 1  |
| II       | PNKD    | 1  | 1  | 5  |
| III      | PNKP    |    |    |    |
| II + III | PNMA1   | 1  | 2  | 2  |
| III      | PNN     |    | 1  | 1  |
| III      | PNO1    | 2  |    | 2  |
| III      | PNP     |    | 2  | 4  |
| III      | PNPLA2  |    |    |    |
| III      | PNPLA3  |    |    | 1  |
| III      | PNPLA4  |    |    |    |
| II       | PNPLA6  | 1  | 1  | 1  |
| III      | PNPLA8  |    |    |    |
| II       | PNPO    | 1  | 5  | 3  |
| II       | PNPT1   | 1  | 1  | 2  |
|          | PNRC1   |    | 2  | 7  |
|          | POC1A   |    |    | 4  |
|          | POC1B   |    |    |    |
| III      | POC5    |    | 2  | 1  |
| II + III | PODXL   | 14 | 20 | 26 |
| II       | PODXL2  | 7  | 6  | 12 |
| II + III | POFUT1  | 6  | 9  | 10 |
| II       | POFUT2  | 1  | 2  | 7  |
| II + III | POGK    | 6  | 8  | 16 |
|          | POGLUT1 |    |    | 2  |
| II + III | POGZ    | 3  | 11 | 18 |
|          | POLA1   |    |    | 1  |
| III      | POLA2   |    |    | 1  |
| III      | POLB    |    |    |    |
| III      | POLD1   |    | 1  | 2  |
| II       | POLD2   | 1  | 2  | 2  |
|          | POLD3   |    | 1  | 1  |
| III      | POLD4   |    |    | 2  |
| II       | POLDIP2 | 3  | 7  | 7  |
| III      | POLDIP3 |    | 1  | 2  |
| II       | POLE    | 3  | 1  | 1  |
| III      | POLE2   |    |    |    |
| II       | POLE3   | 1  | 3  | 6  |
| III      | POLE4   |    |    | 1  |
|          | POLG    | 2  |    | 2  |
|          | POLG2   | 1  |    |    |
|          | POLH    |    | 3  | 3  |
|          | POLI    |    |    |    |
|          | POLK    |    |    |    |
|          | POLL    | 1  |    | 1  |
| III      | POLM    |    |    | 1  |
|          | POLQ    |    |    | 3  |
| II       | POLR1A  | 2  | 4  | 10 |
|          | POLR1B  |    | 1  | 4  |
| III      | POLR1C  |    | 1  | 1  |
|          | POLR1D  |    |    | 3  |
|          | POLR1E  |    | 1  | 2  |

|          |          |   |    |    |
|----------|----------|---|----|----|
| II       | POLR2A   | 6 | 8  | 19 |
|          | POLR2B   |   |    | 1  |
| II       | POLR2C   | 1 | 3  | 4  |
|          | POLR2D   |   | 1  | 7  |
| III      | POLR2E   |   | 1  | 5  |
| III      | POLR2F   |   |    | 2  |
| III      | POLR2G   |   |    |    |
| III      | POLR2H   |   |    |    |
| III      | POLR2I   | 1 |    |    |
| III      | POLR2J   | 1 |    |    |
| III      | POLR2J3  |   |    | 3  |
| II       | POLR2J4  | 1 | 1  | 2  |
| III      | POLR2K   |   |    | 3  |
| III      | POLR2L   | 1 |    | 2  |
|          | POLR3A   |   | 1  | 2  |
|          | POLR3B   | 1 |    | 2  |
| III      | POLR3C   |   |    | 3  |
| II       | POLR3D   | 1 | 3  | 5  |
|          | POLR3E   |   |    | 1  |
| III      | POLR3F   |   |    | 2  |
| III      | POLR3G   |   |    | 1  |
| III      | POLR3GL  |   |    |    |
| II + III | POLR3H   | 2 | 4  | 9  |
| III      | POLR3K   |   |    |    |
| III      | POLRMT   |   |    | 1  |
| II       | POMGNT1  | 2 | 3  | 2  |
| III      | POMP     |   |    | 2  |
| III      | POMT1    | 1 | 1  |    |
| III      | POMT2    |   |    | 3  |
| III      | PON2     | 1 |    | 1  |
| II       | POP1     | 1 | 2  | 3  |
| III      | POP4     |   |    | 2  |
| III      | POP5     | 1 | 2  |    |
| II       | POP7     | 4 | 5  | 11 |
| III      | POPDC3   |   |    |    |
| II       | POR      | 3 | 5  | 5  |
| III      | PORCN    |   |    |    |
| III      | POT1     |   |    |    |
| II + III | PP7080   | 8 | 15 | 22 |
| III      | PPA1     |   |    |    |
| III      | PPA2     | 1 |    |    |
| III      | PPAP2A   |   |    |    |
|          | PPAP2B   |   |    | 1  |
| III      | PPAP2C   |   | 2  | 3  |
| II       | PPAPDC1B | 1 | 4  | 4  |
|          | PPAPDC2  |   | 4  | 5  |
|          | PPARA    |   | 1  | 8  |
|          | PPARD    |   | 4  | 7  |
|          | PPARG    |   | 2  | 2  |
| II + III | PPARGC1A | 2 | 1  | 4  |
| II + III | PPARGC1B | 1 | 1  | 8  |

|          |          |    |    |    |
|----------|----------|----|----|----|
| III      | PPAT     |    | 3  | 1  |
| II       | PPCDC    | 1  | 1  | 2  |
| III      | PPCS     |    |    | 1  |
| II       | PPDPF    | 2  | 2  | 3  |
|          | PPFIA1   |    |    | 1  |
| III      | PPFIA3   |    | 1  | 2  |
| III      | PPFIBP1  |    | 1  | 1  |
| III      | PPHLN1   |    | 1  | 4  |
| III      | PPIA     |    | 2  | 1  |
| II       | PPIB     | 1  | 4  | 5  |
| III      | PPIC     |    |    |    |
| III      | PPID     |    | 1  |    |
| III      | PPIE     | 1  |    | 4  |
| II       | PPIF     | 4  | 3  | 5  |
| III      | PPIG     |    |    |    |
| III      | PPIH     |    |    |    |
| III      | PPIL1    |    | 1  | 5  |
| II       | PPIL2    | 4  | 10 | 14 |
| III      | PPIL3    |    |    |    |
| III      | PPIL4    |    | 2  | 2  |
|          | PPIP5K1  |    |    |    |
|          | PPIP5K2  |    |    |    |
|          | PPL      |    |    |    |
| II + III | PPM1A    | 1  | 2  | 7  |
| II + III | PPM1B    | 1  | 1  | 5  |
| II + III | PPM1D    | 1  | 5  | 3  |
| III      | PPM1F    |    |    |    |
| II       | PPM1G    | 5  | 6  | 9  |
|          | PPM1H    |    | 2  | 6  |
|          | PPM1K    |    |    |    |
|          | PPM1L    |    | 2  | 2  |
| III      | PPM1M    |    |    | 1  |
| III      | PPME1    |    |    | 2  |
| III      | PPOX     |    |    |    |
| III      | PPP1CA   |    | 1  | 1  |
| II       | PPP1CB   | 2  | 2  | 2  |
| II       | PPP1CC   | 1  | 2  | 9  |
| II       | PPP1R10  | 3  | 8  | 8  |
| II       | PPP1R11  | 1  | 2  | 7  |
| III      | PPP1R12A |    | 1  | 2  |
| III      | PPP1R12B |    |    | 3  |
| III      | PPP1R12C |    |    |    |
|          | PPP1R13B |    |    | 1  |
| III      | PPP1R13L |    | 1  |    |
| III      | PPP1R14B |    |    | 2  |
| II       | PPP1R15A | 3  | 3  | 5  |
| II + III | PPP1R15B | 17 | 23 | 25 |
| III      | PPP1R16A |    |    | 1  |
| II       | PPP1R18  | 1  | 8  | 21 |
| III      | PPP1R2   |    |    | 1  |
|          | PPP1R21  |    |    |    |

|          |         |   |   |    |
|----------|---------|---|---|----|
| II + III | PPP1R26 | 3 | 3 | 7  |
| II       | PPP1R35 | 1 | 1 | 3  |
| III      | PPP1R37 | 1 |   | 2  |
|          | PPP1R3B |   |   | 3  |
|          | PPP1R3C |   | 1 | 3  |
| III      | PPP1R3F |   |   |    |
| III      | PPP1R7  |   |   | 2  |
|          | PPP1R8  |   |   | 1  |
| II       | PPP1R9B | 5 | 6 | 13 |
| II       | PPP2CA  | 2 | 2 | 8  |
|          | PPP2CB  |   | 1 |    |
| II       | PPP2R1A | 5 | 4 | 11 |
|          | PPP2R1B |   | 1 | 3  |
| II       | PPP2R2A | 2 | 2 | 4  |
| III      | PPP2R2B |   | 2 | 2  |
| II + III | PPP2R2D | 4 | 1 | 6  |
| III      | PPP2R3B |   |   | 2  |
| III      | PPP2R3C |   |   |    |
| III      | PPP2R4  | 1 |   | 4  |
|          | PPP2R5A |   | 2 | 3  |
| III      | PPP2R5B |   |   |    |
| II       | PPP2R5C | 1 | 2 | 4  |
| III      | PPP2R5D |   | 4 | 2  |
|          | PPP2R5E |   | 2 | 1  |
|          | PPP3CA  |   | 2 | 1  |
| III      | PPP3CB  |   | 1 | 1  |
| III      | PPP3CC  |   |   |    |
| III      | PPP3R1  |   | 4 | 6  |
| II       | PPP4C   | 2 | 2 | 2  |
| II + III | PPP4R1  | 2 | 2 | 9  |
|          | PPP4R1L | 1 |   |    |
|          | PPP4R2  |   | 1 | 2  |
| III      | PPP5C   |   | 1 | 1  |
| II       | PPP6C   | 1 | 6 | 14 |
| II       | PPP6R1  | 3 | 1 | 3  |
| II       | PPP6R2  | 1 | 1 | 2  |
| II       | PPP6R3  | 1 | 1 | 4  |
| II + III | PPRC1   | 3 | 8 | 9  |
| III      | PPT1    |   | 2 | 3  |
|          | PPTC7   |   | 1 | 4  |
| III      | PPWD1   |   |   | 1  |
| III      | PQBP1   |   |   |    |
|          | PQLC1   |   | 1 | 5  |
| II       | PQLC2   | 1 | 1 | 3  |
| III      | PQLC3   |   |   |    |
| III      | PRADC1  |   | 1 | 1  |
| III      | PRAF2   |   | 2 | 1  |
|          | PRAME   |   |   | 3  |
| II       | PRC1    | 1 | 3 | 4  |
| II + III | PRCC    | 1 | 6 | 13 |
| III      | PRCP    |   |   |    |

|          |          |   |   |   |
|----------|----------|---|---|---|
|          | PRDM10   |   | 1 | 3 |
|          | PRDM15   | 1 |   | 2 |
|          | PRDM2    |   |   | 5 |
| II + III | PRDM4    | 1 | 2 | 9 |
| II       | PRDX1    | 1 | 2 | 2 |
| III      | PRDX2    | 2 |   | 4 |
| III      | PRDX3    |   | 2 | 2 |
| III      | PRDX4    | 3 |   | 2 |
| III      | PRDX5    |   |   |   |
| II       | PRDX6    | 1 | 2 | 3 |
| II       | PREB     | 1 | 1 | 2 |
| III      | PRELID1  |   | 1 | 1 |
|          | PREP     |   |   |   |
|          | PREPL    |   |   | 2 |
|          | PREX1    |   |   | 1 |
| II       | PRIC285  | 7 | 1 | 4 |
| III      | PRICKLE3 |   |   | 1 |
|          | PRICKLE4 |   |   | 2 |
| III      | PRIM1    |   |   |   |
| III      | PRIM2    |   | 1 |   |
| II       | PRKAA1   | 1 | 5 | 5 |
|          | PRKAA2   |   | 2 | 3 |
| II       | PRKAB1   | 1 | 1 | 6 |
|          | PRKAB2   |   |   | 5 |
| III      | PRKACA   |   | 5 | 3 |
|          | PRKACB   |   |   | 2 |
| III      | PRKAG1   |   |   | 1 |
|          | PRKAG2   |   |   |   |
| II       | PRKAR1A  | 2 | 2 | 2 |
| III      | PRKAR1B  |   | 1 | 4 |
|          | PRKAR2A  |   |   | 1 |
| III      | PRKAR2B  |   |   |   |
|          | PRKCA    |   | 5 | 6 |
| III      | PRKCD    |   |   |   |
| III      | PRKCDBP  |   |   | 1 |
| III      | PRKCI    |   | 1 | 1 |
| II       | PRKCSH   | 3 | 5 | 4 |
| III      | PRKCZ    |   |   | 1 |
| III      | PRKD2    |   |   | 1 |
|          | PRKD3    |   | 1 | 2 |
| II + III | PRKDC    | 2 | 1 | 2 |
| III      | PRKRA    |   |   |   |
| II + III | PRKX     | 2 | 2 | 7 |
| III      | PRMT1    |   | 2 | 2 |
| II + III | PRMT10   | 1 | 2 | 2 |
| III      | PRMT2    |   | 1 | 2 |
| III      | PRMT3    |   |   |   |
| III      | PRMT5    |   | 1 | 4 |
| II + III | PRMT6    | 1 | 1 | 2 |
| III      | PRMT7    | 1 |   | 2 |
| II + III | PRNP     | 5 | 5 | 6 |



|          |          |    |    |    |
|----------|----------|----|----|----|
| II       | PROCR    | 2  | 2  | 5  |
|          | PROS1    |    |    |    |
|          | PROSC    |    |    | 1  |
| II       | PROSER1  | 3  | 5  | 8  |
|          | PRPF18   |    |    |    |
| III      | PRPF19   |    |    | 4  |
| III      | PRPF3    |    | 2  | 2  |
| III      | PRPF31   |    |    | 1  |
| II       | PRPF38A  | 1  | 2  | 5  |
| III      | PRPF38B  |    | 1  | 1  |
|          | PRPF39   |    | 1  | 2  |
|          | PRPF4    |    | 3  | 2  |
| III      | PRPF40A  |    | 1  |    |
| II       | PRPF4B   | 1  | 1  | 2  |
| II       | PRPF6    | 3  | 2  | 3  |
| II       | PRPF8    | 6  | 8  | 13 |
| III      | PRPS1    |    |    | 1  |
| III      | PRPS2    |    |    | 1  |
|          | PRPSAP1  |    | 1  | 1  |
| III      | PRPSAP2  |    | 1  | 3  |
| II       | PRR11    | 1  | 4  | 5  |
| II       | PRR12    | 10 | 7  | 27 |
| II       | PRR13    | 1  | 1  | 2  |
| III      | PRR14    |    |    | 4  |
|          | PRR14L   | 1  |    | 10 |
| II + III | PRR5L    | 1  | 2  | 3  |
| II       | PRR7     | 3  | 2  | 4  |
| II       | PRRC1    | 3  | 2  | 4  |
| II       | PRRC2A   | 17 | 20 | 40 |
| II       | PRRC2B   | 10 | 21 | 33 |
| II       | PRRC2C   | 5  | 9  | 17 |
|          | PRRG1    |    | 1  | 2  |
| III      | PRRX2    | 1  |    | 1  |
| III      | PRSS16   |    |    |    |
| II       | PRSS21   | 4  | 7  | 7  |
| II + III | PRSS23   | 6  | 6  | 5  |
| III      | PRSS27   |    |    |    |
| II       | PRSS56   | 5  | 3  | 3  |
| III      | PRTFDC1  |    |    |    |
| II + III | PRUNE    | 1  | 1  | 8  |
| II       | PSAP     | 7  | 5  | 3  |
| III      | PSAT1    |    | 2  | 7  |
|          | PSD3     |    | 1  | 3  |
| II + III | PSEN1    | 3  | 4  | 9  |
| III      | PSEN2    |    | 1  | 1  |
| III      | PSENEEN  |    |    |    |
|          | PSIMCT-1 |    | 1  | 1  |
| III      | PSIP1    |    | 1  |    |
| II + III | PSKH1    | 1  | 1  | 4  |
| III      | PSMA1    |    |    | 2  |
| II       | PSMA2    | 1  | 3  | 4  |

|     |         |   |   |    |
|-----|---------|---|---|----|
| II  | PSMA3   | 1 | 1 | 1  |
| II  | PSMA4   | 1 | 1 | 3  |
| III | PSMA5   |   | 1 | 2  |
| III | PSMA6   |   |   | 1  |
| III | PSMA7   |   | 1 | 5  |
| III | PSMB1   |   |   |    |
| III | PSMB10  |   |   |    |
| III | PSMB2   | 1 |   | 4  |
| III | PSMB3   | 1 |   |    |
| III | PSMB4   | 2 |   |    |
| II  | PSMB5   | 1 | 1 | 2  |
| III | PSMB6   |   |   | 1  |
| III | PSMB7   |   | 4 | 4  |
| III | PSMB8   |   | 1 |    |
| III | PSMC2   |   | 1 | 2  |
| III | PSMC3   | 1 |   |    |
| III | PSMC3IP |   |   |    |
| II  | PSMC4   | 1 | 1 | 2  |
| II  | PSMC5   | 2 | 1 | 2  |
| III | PSMC6   |   |   |    |
| III | PSMD1   |   |   | 2  |
| III | PSMD10  |   |   | 1  |
| III | PSMD11  |   |   | 1  |
| II  | PSMD12  | 1 | 2 | 2  |
| III | PSMD13  |   | 1 | 3  |
| III | PSMD14  |   | 1 | 2  |
| II  | PSMD2   | 2 | 2 | 2  |
| II  | PSMD3   | 3 | 4 | 6  |
| III | PSMD4   | 1 |   |    |
|     | PSMD5   |   | 1 | 5  |
| III | PSMD6   |   |   |    |
| II  | PSMD7   | 3 | 1 | 5  |
| II  | PSMD8   | 1 | 2 | 4  |
| III | PSMD9   |   | 2 | 3  |
| III | PSME1   |   |   |    |
| III | PSME2   |   |   |    |
| II  | PSME3   | 1 | 7 | 11 |
|     | PSME4   |   |   | 1  |
| III | PSMF1   |   |   | 2  |
| III | PSMG1   |   |   |    |
| III | PSMG2   |   |   |    |
| III | PSMG3   |   | 2 | 1  |
| III | PSMG4   |   | 1 | 1  |
| III | PSPC1   |   |   | 1  |
| III | PSPH    | 1 |   |    |
| III | PSRC1   |   |   | 2  |
| III | PSTK    |   |   |    |
|     | PTAR1   |   | 2 | 3  |
| II  | PTBP1   | 6 | 6 | 11 |
|     | PTBP2   |   |   | 3  |
| II  | PTBP3   | 1 | 2 | 8  |

|          |         |   |   |    |
|----------|---------|---|---|----|
|          | PTCD2   |   | 1 | 3  |
|          | PTCD3   |   |   | 1  |
| II + III | PTCH1   | 1 | 1 | 4  |
| II       | PTDSS1  | 1 | 6 | 6  |
| III      | PTDSS2  |   | 1 | 10 |
| II       | PTEN    | 1 | 3 | 9  |
|          | PTER    |   |   | 1  |
| II       | PTGES   | 3 | 2 | 4  |
| II       | PTGES2  | 1 | 2 | 3  |
| II       | PTGES3  | 2 | 2 | 4  |
|          | PTGFRN  |   | 2 | 2  |
| III      | PTGR1   |   |   | 1  |
| III      | PTGR2   |   |   |    |
| III      | PTGS1   |   | 4 | 5  |
|          | PTK2    |   |   | 1  |
|          | PTK2B   |   |   |    |
| III      | PTK7    |   | 1 | 2  |
| II       | PTMA    | 1 | 2 | 3  |
| III      | PTMS    | 2 |   |    |
| III      | PTOV1   | 1 |   | 2  |
| II       | PTP4A1  | 4 | 6 | 13 |
| II       | PTP4A2  | 2 | 3 | 9  |
|          | PTPDC1  |   |   | 3  |
| III      | PTPLA   |   |   |    |
| II       | PTPLAD1 | 1 | 4 | 4  |
|          | PTPLB   |   | 2 | 4  |
| III      | PTPMT1  | 1 | 1 |    |
| III      | PTPN1   |   | 7 | 6  |
| II       | PTPN11  | 2 | 4 | 8  |
| II       | PTPN12  | 3 | 3 | 6  |
|          | PTPN13  |   |   |    |
| II + III | PTPN14  | 3 | 4 | 6  |
| III      | PTPN18  |   |   |    |
| III      | PTPN2   |   |   |    |
| II + III | PTPN21  | 1 | 2 | 7  |
| II       | PTPN23  | 4 | 5 | 4  |
|          | PTPN3   |   | 2 | 4  |
| II + III | PTPN9   | 1 | 1 | 5  |
| III      | PTPRA   | 1 |   | 2  |
| II       | PTPRF   | 3 | 4 | 6  |
| II + III | PTPRJ   | 1 | 4 | 7  |
|          | PTPRK   |   | 1 |    |
|          | PTPRM   | 1 |   | 1  |
| II       | PTPRS   | 4 | 3 | 3  |
| III      | PTPRU   |   |   |    |
| II       | PTRF    | 2 | 3 | 16 |
| III      | PTRH1   |   |   | 2  |
| II + III | PTRH2   | 2 | 2 | 4  |
| III      | PTRHD1  |   |   |    |
| III      | PTS     |   |   | 1  |
| III      | PTTG1   |   | 1 | 1  |

|          |         |    |    |    |
|----------|---------|----|----|----|
| II       | PTTG1IP | 2  | 5  | 6  |
| III      | PUF60   |    | 1  | 3  |
| II + III | PUM1    | 3  | 7  | 4  |
|          | PUM2    |    | 6  | 9  |
| II + III | PURA    | 2  | 7  | 8  |
| II + III | PURB    | 1  | 6  | 12 |
|          | PUS1    |    | 3  | 10 |
|          | PUS3    |    | 1  | 3  |
| III      | PUS7    |    | 1  | 1  |
|          | PUS7L   |    |    |    |
| III      | PUSL1   |    |    |    |
| II       | PVR     | 2  | 4  | 14 |
|          | PVRL2   |    | 2  | 4  |
|          | PVRL3   |    | 3  |    |
| II       | PVT1    | 2  | 5  | 9  |
| II       | PWP1    | 2  | 1  | 1  |
| II       | PWP2    | 1  | 1  | 5  |
|          | PWWP2A  |    |    | 3  |
| II + III | PWWP2B  | 3  | 2  | 9  |
| II       | PXDC1   | 2  | 5  | 8  |
| II + III | PXDN    | 16 | 17 | 19 |
| III      | PXK     |    | 1  |    |
| III      | PXMP2   |    |    |    |
| II       | PXN     | 5  | 5  | 17 |
| III      | PYCR1   |    | 2  | 5  |
| III      | PYCR2   |    | 1  | 1  |
|          | PYCRL   |    |    | 1  |
| III      | PYGB    | 2  |    | 2  |
| II       | PYGL    | 2  | 1  | 4  |
| II + III | PYGO1   | 1  | 2  | 9  |
| II + III | PYGO2   | 3  | 10 | 14 |
| III      | PYROXD1 |    | 2  |    |
| III      | PYROXD2 |    |    |    |
| II       | QARS    | 2  | 1  | 2  |
| III      | QDPR    |    |    | 1  |
| II       | QKI     | 2  | 5  | 5  |
| III      | QPCTL   |    | 1  | 3  |
| III      | QPRT    |    | 1  | 2  |
|          | QRICH1  |    | 2  | 7  |
| III      | QRSL1   |    |    | 1  |
| II + III | QSER1   | 4  | 8  | 23 |
| II       | QSOX1   | 4  | 1  | 5  |
| II + III | QSOX2   | 2  | 10 | 16 |
| III      | QTRT1   |    |    |    |
| II + III | QTRTD1  | 2  | 2  | 4  |
| III      | R3HCC1  |    |    | 4  |
| III      | R3HDM1  |    |    | 2  |
| III      | R3HDM2  |    |    | 1  |
| III      | R3HDM4  |    |    |    |
| II       | RAB10   | 1  | 1  | 5  |
| III      | RAB11A  | 1  |    |    |

|          |           |   |   |    |
|----------|-----------|---|---|----|
| III      | RAB11B    | 2 |   | 2  |
|          | RAB11FIP1 |   | 1 | 14 |
|          | RAB11FIP2 |   |   | 4  |
| III      | RAB11FIP3 |   |   |    |
| II       | RAB11FIP5 | 1 | 2 | 9  |
| III      | RAB12     |   |   |    |
| III      | RAB13     |   |   |    |
| II       | RAB14     | 1 | 3 | 4  |
|          | RAB17     |   | 1 | 3  |
| III      | RAB18     |   |   | 3  |
| III      | RAB1A     |   | 1 | 5  |
| II       | RAB1B     | 3 | 6 | 8  |
|          | RAB20     | 1 |   | 7  |
| III      | RAB21     |   | 2 | 3  |
| II       | RAB22A    | 2 | 2 | 1  |
|          | RAB23     |   | 1 | 3  |
| III      | RAB24     |   |   |    |
|          | RAB26     |   |   |    |
| III      | RAB27A    |   |   |    |
|          | RAB28     | 1 |   | 3  |
| III      | RAB2A     |   | 1 | 1  |
| III      | RAB2B     |   |   |    |
|          | RAB30     |   | 1 |    |
| III      | RAB31     | 1 |   | 1  |
|          | RAB32     |   | 1 | 2  |
|          | RAB33B    |   |   |    |
| II       | RAB34     | 1 | 2 | 1  |
| II       | RAB35     | 3 | 4 | 9  |
|          | RAB3D     |   | 1 | 5  |
|          | RAB3GAP1  |   | 1 | 4  |
| II + III | RAB3GAP2  | 1 | 3 | 5  |
|          | RAB3IL1   |   | 3 | 5  |
|          | RAB3IP    |   | 1 |    |
|          | RAB40B    |   |   |    |
| II + III | RAB40C    | 1 | 3 | 10 |
| III      | RAB4A     |   |   | 1  |
| II       | RAB5A     | 1 | 1 | 2  |
| III      | RAB5B     |   | 2 | 5  |
| II       | RAB5C     | 3 | 3 | 8  |
| III      | RAB6A     |   | 2 | 1  |
| III      | RAB6B     |   |   |    |
| II       | RAB7A     | 1 | 3 | 5  |
|          | RAB7L1    |   |   | 1  |
| II       | RAB8A     | 3 | 2 | 8  |
|          | RAB8B     |   |   | 2  |
| II + III | RAB9A     | 1 | 1 | 2  |
| III      | RABAC1    | 3 |   |    |
| II       | RABEP1    | 1 | 3 | 6  |
| III      | RABEP2    |   |   | 1  |
| III      | RABEPK    |   | 2 |    |
|          | RABGAP1   | 2 |   | 1  |

|          |          |   |    |    |
|----------|----------|---|----|----|
|          | RABGAP1L |   |    |    |
|          | RABGEF1  |   |    |    |
| III      | RABGGTA  | 1 |    |    |
| III      | RABGGTB  |   |    | 1  |
|          | RABIF    |   | 2  | 3  |
| III      | RABL3    |   |    | 1  |
|          | RABL5    |   |    |    |
| II       | RAC1     | 1 | 3  | 5  |
|          | RACGAP1  |   | 1  | 2  |
| II       | RAD1     | 1 | 3  | 1  |
|          | RAD17    |   |    |    |
| III      | RAD18    |   | 1  | 5  |
| III      | RAD21    |   | 2  | 3  |
| III      | RAD23A   |   |    |    |
| III      | RAD23B   |   | 1  | 7  |
| III      | RAD50    |   |    | 5  |
| III      | RAD51    |   |    |    |
| III      | RAD51AP1 |   |    |    |
|          | RAD51B   |   |    | 2  |
| III      | RAD51C   |   |    | 1  |
|          | RAD52    | 1 | 1  |    |
| III      | RAD54B   |   |    | 1  |
| III      | RAD54L   |   | 1  | 2  |
| II       | RAD54L2  | 1 | 1  | 6  |
|          | RAD9A    | 1 |    | 4  |
| III      | RAE1     |   | 2  | 5  |
| II + III | RAF1     | 3 | 3  | 8  |
| II + III | RAI1     | 8 | 12 | 32 |
|          | RAI14    |   | 2  | 3  |
| III      | RALA     |   |    |    |
| III      | RALB     |   |    | 1  |
|          | RALBP1   |   | 1  | 2  |
|          | RALGAPA1 |   | 2  | 1  |
|          | RALGAPB  |   | 1  | 4  |
|          | RALGDS   |   | 1  | 3  |
| II       | RALGPS2  | 1 | 2  | 1  |
| II       | RALY     | 1 | 2  | 2  |
| II       | RAN      | 3 | 5  | 4  |
| III      | RANBP1   |   |    |    |
|          | RANBP10  |   | 4  | 12 |
|          | RANBP17  |   |    | 2  |
|          | RANBP2   |   | 2  | 6  |
| II       | RANBP3   | 1 | 2  | 4  |
|          | RANBP6   |   |    | 2  |
| III      | RANBP9   | 1 |    | 2  |
| II       | RANGAP1  | 8 | 10 | 18 |
| III      | RANGRF   |   | 1  | 1  |
| III      | RAP1A    |   |    | 1  |
| III      | RAP1B    |   |    |    |
| III      | RAP1GAP  |   | 1  |    |
| II       | RAP1GAP2 | 2 | 5  | 13 |

|          |          |   |    |    |
|----------|----------|---|----|----|
| III      | RAP1GDS1 |   |    |    |
|          | RAP2A    | 1 |    | 5  |
| II + III | RAP2B    | 1 | 2  | 5  |
| II       | RAP2C    | 1 | 3  | 4  |
| II       | RAPGEF1  | 1 | 3  | 6  |
|          | RAPGEF2  |   | 1  | 2  |
|          | RAPGEF6  |   | 2  | 6  |
| II + III | RAPH1    | 1 | 5  | 14 |
|          | RARA     |   | 6  | 11 |
| III      | RARG     |   |    | 1  |
| III      | RARS     | 1 |    | 2  |
| III      | RARS2    |   | 1  |    |
|          | RASA1    |   |    | 3  |
|          | RASA2    |   |    | 2  |
| III      | RASA3    |   |    |    |
| II + III | RASAL2   | 2 | 5  | 8  |
|          | RASGEF1B |   | 2  | 1  |
| III      | RASIP1   |   | 2  | 3  |
| III      | RASL10B  |   |    | 5  |
|          | RASL11A  |   |    |    |
| III      | RASSF1   |   | 3  | 1  |
| II       | RASSF3   | 1 | 4  | 1  |
| III      | RASSF7   |   |    |    |
| II + III | RASSF8   | 4 | 4  | 9  |
| II       | RAVER1   | 2 | 2  | 8  |
|          | RAVER2   |   |    | 2  |
| II       | RB1      | 1 | 2  | 3  |
| II + III | RB1CC1   | 1 | 4  | 4  |
|          | RBAK     |   | 3  | 6  |
| III      | RBBP4    |   | 2  | 3  |
|          | RBBP5    |   |    | 1  |
| II       | RBBP6    | 2 | 6  | 10 |
| III      | RBBP7    |   | 1  |    |
| III      | RBBP8    |   | 2  | 1  |
| III      | RBBP9    |   | 1  | 3  |
| III      | RBCK1    |   | 1  | 2  |
| III      | RBFA     |   |    |    |
| II       | RBFOX2   | 2 | 2  | 8  |
| III      | RBKS     |   |    |    |
|          | RBL1     |   | 2  | 2  |
|          | RBL2     |   |    | 1  |
| II       | RBM10    | 1 | 2  | 1  |
| II + III | RBM12    | 2 | 7  | 15 |
| II + III | RBM12B   | 2 | 3  | 9  |
| II       | RBM14    | 5 | 3  | 11 |
| II + III | RBM15    | 5 | 15 | 19 |
| II + III | RBM15B   | 5 | 9  | 17 |
| III      | RBM17    |   |    |    |
| III      | RBM18    |   | 1  |    |
| III      | RBM19    | 1 |    | 3  |
|          | RBM22    |   | 2  | 5  |

|          |        |   |   |    |
|----------|--------|---|---|----|
| II       | RBM23  | 1 | 4 | 5  |
| III      | RBM25  |   | 1 | 3  |
| II       | RBM26  | 1 | 1 | 1  |
| III      | RBM27  |   | 7 | 8  |
| II       | RBM28  | 1 | 2 | 2  |
| II       | RBM3   | 2 | 2 | 7  |
| II       | RBM33  | 1 | 2 | 5  |
| III      | RBM34  |   |   | 5  |
| II + III | RBM38  | 6 | 7 | 14 |
| II       | RBM39  | 2 | 7 | 3  |
|          | RBM41  |   |   | 1  |
| III      | RBM42  |   | 1 | 1  |
| III      | RBM45  |   |   |    |
|          | RBM47  |   |   | 2  |
|          | RBM48  |   |   | 1  |
|          | RBM4B  |   |   | 3  |
| III      | RBM5   |   | 1 | 1  |
|          | RBM6   | 1 |   | 3  |
| III      | RBM7   |   |   |    |
| III      | RBM8A  |   |   | 2  |
| III      | RBMS1  |   |   | 2  |
| II       | RBMX   | 2 | 3 | 4  |
| III      | RBMX2  |   |   |    |
|          | RBPJ   |   | 1 | 4  |
| III      | RBPMS  |   | 1 | 7  |
| III      | RBPMS2 |   |   | 2  |
| III      | RBX1   |   |   |    |
| II       | RC3H1  | 1 | 2 | 10 |
| II + III | RC3H2  | 1 | 2 | 4  |
|          | RCAN1  |   | 1 | 5  |
| III      | RCAN3  | 1 |   |    |
|          | RCBTB1 |   |   |    |
| III      | RCC1   |   | 3 | 7  |
| II       | RCC2   | 1 | 2 | 13 |
|          | RCCD1  | 1 |   | 2  |
| III      | RCE1   |   | 2 | 2  |
| III      | RCHY1  |   |   |    |
|          | RCL1   |   | 2 | 2  |
| II       | RCN1   | 3 | 2 | 4  |
| II       | RCN2   | 1 | 1 | 1  |
| II       | RCN3   | 3 | 2 | 3  |
| II + III | RCOR1  | 4 | 6 | 8  |
| III      | RCOR2  |   |   |    |
| II       | RCOR3  | 2 | 2 | 6  |
| III      | RDBP   |   |   | 1  |
|          | RDH10  |   |   |    |
| II       | RDH11  | 2 | 1 | 4  |
| II       | RDH13  | 5 | 4 | 10 |
| III      | RDX    |   | 4 | 7  |
|          | RECK   |   | 1 | 1  |
|          | RECQL  |   |   |    |



|          |        |   |   |    |
|----------|--------|---|---|----|
| III      | RECQL4 |   | 1 | 1  |
|          | RECQL5 |   |   | 1  |
| III      | REEP1  |   |   |    |
| III      | REEP2  |   |   |    |
| III      | REEP3  | 1 | 1 |    |
| II       | REEP4  | 7 | 6 | 5  |
| II       | REEP5  | 2 | 4 | 4  |
| III      | REEP6  |   |   |    |
|          | REL    |   | 1 | 3  |
| III      | RELA   |   | 1 | 5  |
| III      | RELB   |   |   |    |
| III      | RELL2  |   |   | 1  |
| III      | RELT   |   |   | 1  |
| II + III | REPIN1 | 5 | 4 | 16 |
| III      | REPS1  |   |   | 1  |
| II       | RER1   | 4 | 4 | 3  |
| II       | RERE   | 1 | 4 | 7  |
| II + III | REST   | 7 | 4 | 6  |
| II       | RETSAT | 1 | 1 | 2  |
|          | REV1   |   | 2 | 1  |
|          | REV3L  |   | 2 | 6  |
| II       | REXO1  | 1 | 4 | 13 |
| III      | REXO2  |   |   |    |
| III      | REXO4  | 1 |   | 1  |
| III      | RFC1   |   |   | 2  |
| III      | RFC2   |   |   |    |
| III      | RFC3   |   | 1 | 2  |
| III      | RFC4   |   |   |    |
| III      | RFC5   |   | 1 | 2  |
| III      | RFK    | 1 |   |    |
| II       | RFNG   | 1 | 3 | 3  |
| II       | RFT1   | 1 | 1 | 4  |
|          | RFTN1  |   |   |    |
|          | RFWD2  | 1 |   | 1  |
| II + III | RFWD3  | 4 | 7 | 8  |
| III      | RFX1   |   | 1 | 2  |
| II       | RFX5   | 1 | 1 | 2  |
|          | RFX7   |   | 3 | 4  |
| III      | RFXANK |   |   | 1  |
| III      | RFXAP  |   | 1 |    |
| III      | RGL2   |   |   | 2  |
| III      | RGL3   |   |   |    |
| II + III | RGMB   | 2 | 3 | 5  |
|          | RGNEF  |   | 2 | 4  |
| II       | RGP1   | 3 | 2 | 3  |
| III      | RGS10  |   |   |    |
|          | RGS12  |   |   | 4  |
| III      | RGS14  |   |   |    |
| III      | RGS19  |   |   | 1  |
|          | RGS2   |   | 1 |    |
| III      | RHBDD2 |   | 2 | 3  |

|          |          |    |    |    |
|----------|----------|----|----|----|
| III      | RHBDD3   |    |    | 2  |
| III      | RHBDF1   |    |    | 1  |
| II       | RHBDF2   | 2  | 2  | 5  |
| III      | RHEB     |    |    | 1  |
| III      | RHOA     | 3  |    | 3  |
| II + III | RHOB     | 15 | 13 | 10 |
|          | RHOBTB1  |    |    | 7  |
| II + III | RHOBTB2  | 3  | 5  | 20 |
|          | RHOBTB3  |    | 1  | 5  |
| III      | RHOC     |    | 1  | 1  |
| III      | RHOD     |    | 1  | 1  |
| II + III | RHOF     | 5  | 9  | 23 |
|          | RHOG     |    | 1  | 7  |
| III      | RHOT1    |    |    |    |
| III      | RHOT2    |    |    | 1  |
| II + III | RHOU     | 1  | 2  | 4  |
| II + III | RHOV     | 6  | 7  | 8  |
| III      | RHPN1    |    | 1  | 2  |
| III      | RHPN2    |    |    | 1  |
| II       | RIBC2    | 2  | 1  | 2  |
| II + III | RIC8A    | 5  | 3  | 5  |
|          | RIC8B    |    | 2  | 5  |
| II + III | RICTOR   | 1  | 2  | 5  |
|          | RIF1     |    | 2  | 3  |
| III      | RILP     |    |    |    |
| III      | RILPL1   |    | 1  | 4  |
| III      | RILPL2   | 1  |    |    |
| II + III | RIMKLB   | 1  | 2  | 5  |
| II       | RIMS4    | 1  | 2  | 5  |
| III      | RIN1     |    |    |    |
|          | RIN2     |    | 1  | 1  |
| III      | RING1    | 1  | 1  |    |
| II       | RINT1    | 1  | 1  | 2  |
| III      | RIOK1    | 1  |    |    |
| III      | RIOK2    |    |    |    |
| III      | RIOK3    |    | 1  | 1  |
| II + III | RIPK1    | 1  | 2  | 8  |
|          | RIPK2    |    |    | 1  |
|          | RIPK4    |    |    | 1  |
|          | RIT1     |    | 1  |    |
|          | RLF      |    | 4  | 8  |
| II + III | RLIM     | 1  | 3  | 11 |
| III      | RLTPR    |    |    | 1  |
|          | RMI1     |    |    |    |
| II + III | RMI2     | 2  | 2  | 4  |
|          | RMND1    |    |    |    |
|          | RMND5A   |    | 1  | 2  |
| III      | RMND5B   |    |    |    |
|          | RMRP     | 2  | 1  |    |
| III      | RNASEH1  | 1  |    | 3  |
| II       | RNASEH2A | 1  | 1  | 3  |

|          |          |   |    |    |
|----------|----------|---|----|----|
| III      | RNASEH2B |   |    | 1  |
| II       | RNASEH2C | 1 | 4  | 2  |
| II       | RNASEK   | 6 | 5  | 6  |
|          | RNASEL   |   |    |    |
| III      | RNASET2  |   |    |    |
|          | RND3     |   |    |    |
| II       | RNF10    | 2 | 2  | 5  |
|          | RNF11    |   |    | 1  |
| II + III | RNF111   | 1 | 3  | 4  |
|          | RNF113A  |   |    |    |
| II       | RNF114   | 1 | 1  | 1  |
| III      | RNF115   |   |    | 1  |
| II       | RNF121   | 2 | 4  | 9  |
| III      | RNF123   |   |    | 1  |
| III      | RNF126   |   |    | 3  |
|          | RNF13    |   | 2  | 3  |
|          | RNF130   |   | 2  | 1  |
|          | RNF135   |   |    |    |
| III      | RNF138   |   |    |    |
| II + III | RNF139   | 2 | 4  | 5  |
|          | RNF14    |   |    |    |
| III      | RNF141   |   |    |    |
|          | RNF144B  | 1 |    | 3  |
| II + III | RNF145   | 1 | 4  | 5  |
|          | RNF146   |   |    | 1  |
| III      | RNF149   | 1 |    | 1  |
|          | RNF150   |   |    |    |
|          | RNF166   |   |    | 1  |
| III      | RNF167   |   | 2  | 3  |
|          | RNF168   |   | 1  | 6  |
|          | RNF169   |   | 4  | 10 |
| III      | RNF170   | 1 |    | 1  |
| II       | RNF181   | 1 | 2  | 1  |
| II + III | RNF182   | 5 | 4  | 10 |
|          | RNF185   |   | 4  | 13 |
| III      | RNF187   |   | 6  | 5  |
|          | RNF19A   |   | 1  | 4  |
|          | RNF19B   |   | 1  |    |
| III      | RNF2     |   | 1  | 1  |
| II       | RNF20    | 1 | 2  | 3  |
| II       | RNF212   | 2 | 2  | 2  |
| II + III | RNF213   | 6 | 10 | 13 |
| III      | RNF214   |   | 1  |    |
| III      | RNF215   |   |    | 1  |
|          | RNF216   |   | 1  | 9  |
| II + III | RNF216P1 | 2 | 8  | 19 |
| II + III | RNF217   | 1 | 3  | 5  |
|          | RNF219   |   | 1  | 1  |
| III      | RNF220   | 1 |    |    |
| II + III | RNF24    | 1 | 2  | 5  |
| III      | RNF25    | 1 |    | 1  |

|          |          |    |    |    |
|----------|----------|----|----|----|
| II + III | RNF26    | 11 | 22 | 27 |
| III      | RNF31    |    |    |    |
| II + III | RNF34    | 2  | 3  | 5  |
|          | RNF38    |    |    |    |
| II + III | RNF4     | 1  | 1  | 4  |
| II       | RNF40    | 1  | 6  | 11 |
|          | RNF41    |    | 4  | 6  |
| III      | RNF44    | 2  |    | 4  |
|          | RNF6     |    | 1  | 4  |
| III      | RNF7     |    |    | 1  |
|          | RNF8     |    |    | 2  |
| III      | RNFT1    |    |    | 1  |
| II       | RNFT2    | 2  | 5  | 8  |
|          | RNGTT    |    |    | 8  |
| II       | RNH1     | 1  | 2  | 2  |
| II       | RNMT     | 1  | 1  | 2  |
|          | RNMTL1   |    | 2  | 4  |
| III      | RNPC3    |    | 1  |    |
| III      | RNPEP    |    |    |    |
| II       | RNPEPL1  | 2  | 3  | 10 |
| II       | RNPS1    | 1  | 3  | 4  |
|          | ROBO1    |    | 1  | 2  |
| III      | ROCK1    |    | 3  | 1  |
| II       | ROCK2    | 2  | 5  | 7  |
| III      | ROGDI    |    |    |    |
| III      | ROMO1    |    |    | 2  |
| II + III | ROR2     | 5  | 10 | 15 |
|          | RP2      | 1  |    | 2  |
| III      | RP9      |    |    |    |
|          | RPA1     | 1  |    | 2  |
| III      | RPA2     | 1  |    |    |
| III      | RPA3     |    |    |    |
| III      | RPAIN    |    |    | 1  |
| II       | RPAP1    | 1  | 1  | 5  |
| III      | RPAP2    |    | 1  |    |
| III      | RPAP3    |    |    | 2  |
| III      | RPE      |    |    | 1  |
| III      | RPF1     |    | 1  | 1  |
| III      | RPF2     |    |    |    |
| III      | RPGR     |    |    |    |
| III      | RPGRIP1L |    |    |    |
| III      | RPIA     |    |    |    |
| II       | RPL10    | 1  | 2  | 3  |
| III      | RPL10A   |    | 2  | 3  |
| III      | RPL11    |    |    | 1  |
| III      | RPL12    | 2  |    |    |
| II       | RPL13    | 2  | 3  | 3  |
| II       | RPL13A   | 1  | 3  | 1  |
|          | RPL13P5  |    |    |    |
| III      | RPL14    |    | 2  | 1  |
| II       | RPL15    | 3  | 1  | 4  |

|          |         |   |    |    |
|----------|---------|---|----|----|
| III      | RPL17   |   | 1  | 2  |
| II       | RPL18   | 1 | 5  | 2  |
| III      | RPL18A  |   |    |    |
| III      | RPL19   |   | 2  | 3  |
| III      | RPL22   |   | 2  | 2  |
| III      | RPL22L1 |   |    |    |
| III      | RPL23   | 1 | 2  |    |
| III      | RPL23A  | 1 | 2  |    |
| III      | RPL24   |   | 1  |    |
| III      | RPL26   |   |    | 1  |
| III      | RPL26L1 |   |    |    |
| III      | RPL27   |   | 2  |    |
| II       | RPL27A  | 2 | 5  | 9  |
| II       | RPL28   | 2 | 1  | 4  |
| III      | RPL29   |   | 1  | 2  |
| II       | RPL3    | 1 | 2  | 2  |
| III      | RPL30   |   | 1  | 3  |
| III      | RPL31   |   |    | 3  |
| II       | RPL32   | 1 | 1  | 3  |
| III      | RPL34   |   |    |    |
| II       | RPL35   | 1 | 3  | 1  |
| III      | RPL35A  |   |    |    |
| II       | RPL36   | 1 | 1  | 1  |
| III      | RPL36AL |   |    |    |
| III      | RPL37   |   | 2  | 1  |
| II       | RPL37A  | 1 | 1  | 2  |
| II       | RPL38   | 3 | 1  | 1  |
| III      | RPL39L  |   |    |    |
| II       | RPL4    | 3 | 1  | 3  |
| II       | RPL41   | 1 | 2  | 6  |
| III      | RPL5    | 1 | 1  |    |
| II       | RPL6    | 1 | 3  | 7  |
| III      | RPL7A   |   | 1  | 3  |
| II       | RPL8    | 2 | 5  | 2  |
| II       | RPL9    | 2 | 3  | 3  |
| III      | RPLP0   |   | 1  | 6  |
| II       | RPLP1   | 3 | 3  | 4  |
| III      | RPLP2   |   |    | 1  |
| II       | RPN1    | 1 | 5  | 4  |
| II + III | RPN2    | 9 | 9  | 9  |
|          | RPP14   |   | 1  | 6  |
| II + III | RPP25   | 3 | 6  | 16 |
|          | RPP25L  |   |    | 3  |
| II       | RPP30   | 1 | 1  | 1  |
|          | RPP38   |   | 1  | 2  |
| III      | RPP40   |   |    |    |
| III      | RPRD1A  |   | 2  | 3  |
| II + III | RPRD1B  | 2 | 7  | 12 |
| II + III | RPRD2   | 7 | 16 | 30 |
| III      | RPS11   | 1 | 1  |    |
| III      | RPS12   |   | 2  |    |

|          |          |   |   |    |
|----------|----------|---|---|----|
| III      | RPS13    | 1 |   |    |
| III      | RPS14    | 1 | 1 |    |
| III      | RPS15    |   | 1 | 3  |
| II       | RPS15A   | 1 | 1 | 2  |
| III      | RPS16    |   |   | 3  |
| III      | RPS18    |   | 1 |    |
| III      | RPS19    |   | 1 | 2  |
| III      | RPS19BP1 | 1 |   |    |
| III      | RPS20    | 1 |   |    |
| II       | RPS21    | 1 | 2 | 3  |
| II       | RPS23    | 1 | 1 | 2  |
| III      | RPS24    |   | 1 |    |
| III      | RPS25    |   | 1 | 2  |
| III      | RPS26    |   |   | 1  |
| III      | RPS27A   |   | 3 | 3  |
| III      | RPS27L   |   |   |    |
| III      | RPS28    |   |   |    |
| III      | RPS29    | 1 |   | 1  |
| III      | RPS3     |   | 2 | 1  |
| II       | RPS4X    | 1 | 4 | 3  |
| II       | RPS5     | 1 | 2 | 4  |
| III      | RPS6     |   | 4 | 2  |
|          | RPS6KA1  |   |   | 3  |
|          | RPS6KA3  |   | 2 | 2  |
| III      | RPS6KA4  |   | 1 | 2  |
|          | RPS6KA5  |   |   |    |
| II + III | RPS6KB1  | 1 | 2 | 8  |
| III      | RPS6KB2  | 1 |   |    |
|          | RPS6KC1  |   | 2 | 1  |
| II       | RPS7     | 2 | 2 | 1  |
| III      | RPS8     |   | 1 | 3  |
| III      | RPS9     | 2 | 1 |    |
| II       | RPTOR    | 4 | 8 | 22 |
| II       | RPUSD1   | 3 | 2 | 15 |
| II + III | RPUSD2   | 1 | 1 | 4  |
| III      | RPUSD3   | 1 |   | 3  |
|          | RPUSD4   |   |   | 2  |
|          | RQCD1    |   | 2 | 3  |
| II + III | RRAGA    | 2 | 3 | 3  |
|          | RRAGB    |   |   | 1  |
|          | RRAGC    |   |   |    |
| III      | RRAS     |   |   | 1  |
| III      | RRAS2    |   |   |    |
| II       | RRBP1    | 1 | 1 | 3  |
| II + III | RREB1    | 5 | 7 | 20 |
|          | RRM1     |   | 1 | 1  |
| II       | RRM2     | 3 | 5 | 3  |
|          | RRM2B    |   | 1 | 1  |
|          | RRN3     |   | 1 | 1  |
| III      | RRNAD1   |   | 1 | 3  |
| II       | RRP1     | 1 | 2 | 3  |

|          |         |   |   |    |
|----------|---------|---|---|----|
| II       | RRP12   | 1 | 2 | 1  |
| III      | RRP15   |   |   | 1  |
| II + III | RRP1B   | 2 | 1 | 3  |
| II       | RRP36   | 2 | 1 | 4  |
| II       | RRP7A   | 2 | 3 | 6  |
| III      | RRP7B   | 1 |   | 2  |
|          | RRP8    |   | 1 | 1  |
| III      | RRP9    |   |   |    |
| III      | RRS1    |   |   | 1  |
|          | RSAD1   |   | 1 | 4  |
|          | RSBN1   | 1 |   | 1  |
| II + III | RSBN1L  | 1 | 1 | 1  |
| II       | RSF1    | 1 | 4 | 8  |
|          | RSG1    | 1 |   | 2  |
| II       | RSL1D1  | 2 | 3 | 5  |
| III      | RSL24D1 |   |   |    |
|          | RSPH3   |   |   |    |
|          | RSPRY1  | 1 |   |    |
| III      | RSRC1   |   |   | 1  |
| III      | RSRC2   |   |   |    |
| III      | RSU1    |   |   |    |
| III      | RTCA    |   |   |    |
| III      | RTF1    |   |   | 2  |
|          | RTKN    |   | 3 | 5  |
|          | RTKN2   |   |   | 1  |
| III      | RTN2    |   |   |    |
| II       | RTN3    | 2 | 7 | 2  |
| II       | RTN4    | 6 | 8 | 9  |
|          | RTN4IP1 |   |   |    |
| II + III | RTN4R   | 3 | 5 | 5  |
| II       | RTN4RL2 | 3 | 3 | 9  |
|          | RTTN    |   |   |    |
| III      | RUFY1   |   | 1 | 1  |
| III      | RUFY2   |   |   |    |
| III      | RUFY3   |   | 3 | 1  |
| II + III | RUNDC1  | 2 | 4 | 2  |
| III      | RUSC1   |   | 3 | 5  |
| II + III | RUSC2   | 1 | 6 | 12 |
| II       | RUVBL1  | 1 | 1 | 4  |
| III      | RUVBL2  |   | 1 | 1  |
| III      | RWDD1   |   |   |    |
|          | RWDD2A  |   |   |    |
|          | RWDD2B  |   | 1 | 1  |
|          | RWDD3   |   |   |    |
| II       | RXRA    | 7 | 6 | 25 |
|          | RXRB    |   | 3 | 6  |
|          | RYBP    |   | 3 | 6  |
| III      | RYK     |   |   | 2  |
| III      | S100A10 |   | 2 | 2  |
| II       | S100A11 | 2 | 4 | 5  |
| III      | S100A13 |   |   | 1  |

|          |         |   |    |    |
|----------|---------|---|----|----|
| III      | S100A16 |   |    |    |
| III      | S100A2  |   |    |    |
| II       | S100A4  | 1 | 1  | 2  |
| III      | S100A6  |   |    |    |
| III      | S100P   |   |    |    |
|          | S100PBP |   |    | 3  |
|          | S1PR5   |   | 2  | 1  |
| III      | SAA1    |   |    |    |
| III      | SAAL1   |   |    |    |
| III      | SAC3D1  | 1 |    | 1  |
|          | SACM1L  |   |    | 2  |
| II + III | SACS    | 1 | 3  | 3  |
| III      | SAE1    |   |    | 2  |
| III      | SAFB    | 1 |    |    |
| III      | SAFB2   |   |    | 1  |
| III      | SAMD1   |   |    |    |
| III      | SAMD10  |   |    | 1  |
|          | SAMD11  | 2 |    | 3  |
| II + III | SAMD4A  | 2 | 2  | 5  |
| II       | SAMD4B  | 3 | 5  | 7  |
|          | SAMD8   |   | 1  | 1  |
| III      | SAMHD1  |   |    |    |
| III      | SAMM50  | 1 | 2  |    |
|          | SAP130  |   | 1  | 3  |
| III      | SAP18   |   | 1  | 1  |
| III      | SAP30   |   |    | 1  |
| II       | SAP30BP | 1 | 2  | 8  |
|          | SAP30L  |   | 1  | 2  |
| II       | SAPCD2  | 1 | 4  | 12 |
| II       | SAR1A   | 2 | 2  | 4  |
| II       | SAR1B   | 1 | 3  | 3  |
| III      | SARNP   |   |    | 1  |
| II       | SARS    | 2 | 4  | 3  |
| III      | SARS2   |   | 1  | 1  |
| III      | SART1   |   |    |    |
| II       | SART3   | 1 | 1  | 1  |
|          | SASH1   |   | 1  | 5  |
| III      | SASS6   |   | 1  | 1  |
| III      | SAT1    |   | 1  | 1  |
| III      | SAT2    |   | 1  | 2  |
|          | SATB2   |   |    | 6  |
|          | SAV1    |   | 1  | 3  |
|          | SAYSD1  |   |    | 3  |
| III      | SBDS    |   |    | 1  |
| III      | SBDSP1  |   |    |    |
| III      | SBF1    | 1 |    | 1  |
|          | SBF2    |   | 3  | 5  |
|          | SBNO1   |   |    | 2  |
| II       | SBNO2   | 6 | 1  | 4  |
|          | SC5DL   |   | 2  | 4  |
| II       | SCAF1   | 8 | 15 | 27 |



|          |         |    |    |    |
|----------|---------|----|----|----|
|          | SCAF11  |    | 2  | 5  |
|          | SCAF4   |    | 2  | 4  |
| II + III | SCAF8   | 2  | 7  | 11 |
|          | SCAI    |    | 1  | 1  |
| III      | SCAMP1  |    | 1  |    |
| III      | SCAMP2  | 1  | 1  |    |
| II       | SCAMP3  | 2  | 2  | 4  |
| II       | SCAMP4  | 5  | 7  | 11 |
| III      | SCAMP5  |    |    | 1  |
| III      | SCAND1  | 2  |    | 1  |
| II       | SCAP    | 4  | 3  | 5  |
| III      | SCAPER  |    |    | 3  |
| II + III | SCARA3  | 13 | 21 | 33 |
| II       | SCARB1  | 10 | 12 | 13 |
| II       | SCARB2  | 1  | 1  | 6  |
| III      | SCCPDH  |    |    |    |
| II       | SCD     | 16 | 24 | 26 |
| III      | SCD5    |    | 1  | 4  |
| III      | SCFD1   |    |    |    |
|          | SCFD2   |    |    | 1  |
| III      | SCLT1   |    |    | 4  |
| III      | SCMH1   |    |    | 1  |
|          | SCML1   |    | 1  | 4  |
|          | SCML2   |    |    |    |
| III      | SCN1B   |    |    |    |
| II + III | SCO1    | 1  | 1  | 2  |
| III      | SCOC    |    |    |    |
| III      | SCP2    |    |    | 1  |
| III      | SCPEP1  |    |    |    |
| III      | SCRIB   | 2  |    |    |
| III      | SCRN1   |    |    | 2  |
| III      | SCRN2   |    |    |    |
| III      | SCRN3   |    |    |    |
| II       | SCYL1   | 1  | 1  | 3  |
| II + III | SCYL2   | 1  | 1  | 4  |
|          | SCYL3   |    | 1  | 1  |
| II       | SDAD1   | 1  | 1  | 1  |
| II + III | SDC1    | 12 | 13 | 18 |
|          | SDC2    |    |    |    |
|          | SDC3    |    | 1  | 2  |
| II       | SDC4    | 4  | 4  | 5  |
| III      | SDCBP   |    | 2  | 3  |
| II       | SDCCAG3 | 2  | 5  | 7  |
| III      | SDCCAG8 | 1  |    |    |
|          | SDF2    |    | 4  | 9  |
| II       | SDF2L1  | 2  | 1  | 2  |
| II       | SDF4    | 4  | 9  | 5  |
| II       | SDHA    | 3  | 3  | 10 |
|          | SDHAF1  |    |    | 1  |
|          | SDHAF2  |    |    |    |
| III      | SDHAP1  | 1  |    | 1  |

|          |           |    |    |    |
|----------|-----------|----|----|----|
| II       | SDHAP2    | 1  | 1  | 2  |
| III      | SDHAP3    |    |    | 2  |
| III      | SDHB      |    | 1  | 1  |
| II       | SDHC      | 1  | 3  | 3  |
| III      | SDHD      |    | 1  |    |
| III      | SDR39U1   |    |    |    |
| III      | SEC11A    |    |    | 1  |
| III      | SEC11C    |    |    |    |
| III      | SEC13     |    | 1  | 5  |
| II       | SEC14L1   | 1  | 1  | 5  |
| III      | SEC14L2   |    |    |    |
| III      | SEC14L4   |    |    |    |
| II + III | SEC16A    | 11 | 13 | 24 |
|          | SEC22A    |    | 1  | 1  |
| III      | SEC22B    |    | 2  | 3  |
| III      | SEC22C    |    | 3  | 3  |
|          | SEC23A    | 1  |    | 1  |
| III      | SEC23B    |    |    | 1  |
|          | SEC23IP   |    | 2  | 4  |
| II + III | SEC24A    | 1  | 5  | 5  |
|          | SEC24B    | 1  |    | 2  |
| II       | SEC24C    | 2  | 4  | 4  |
|          | SEC24D    |    |    | 1  |
| II       | SEC31A    | 1  | 1  | 2  |
| II + III | SEC61A1   | 18 | 26 | 26 |
| III      | SEC61A2   |    | 2  | 3  |
| III      | SEC61B    |    |    |    |
| III      | SEC61G    |    |    |    |
| III      | SEC62     |    | 1  | 4  |
| III      | SEC63     |    |    | 2  |
| III      | SECISBP2  |    |    | 2  |
| II + III | SECISBP2L | 1  | 3  | 4  |
|          | SECTM1    |    | 1  | 4  |
| III      | SEH1L     |    | 1  | 2  |
|          | SEL1L     |    | 6  | 8  |
| II + III | SEL1L3    | 1  | 2  | 3  |
| III      | SELENBP1  |    |    |    |
| III      | SELK      |    |    | 1  |
| III      | SELM      |    | 2  | 4  |
| III      | SELO      |    | 1  | 1  |
| II + III | SELRC1    | 4  | 4  | 7  |
| III      | SELT      |    |    | 2  |
| II       | SEMA3B    | 2  | 1  | 2  |
|          | SEMA3C    |    |    |    |
| III      | SEMA3F    |    | 1  | 1  |
| II + III | SEMA4B    | 1  | 3  | 5  |
|          | SEMA4C    |    | 2  | 2  |
|          | SEMA4D    |    |    | 2  |
|          | SEMA6D    | 1  |    | 3  |
|          | SENP1     | 1  |    | 6  |
| II       | SENP2     | 1  | 3  | 5  |

|          |          |    |    |    |
|----------|----------|----|----|----|
|          | SENP5    |    |    | 4  |
| III      | SENP6    |    | 1  | 1  |
| III      | SENP7    |    |    |    |
|          | SENP8    |    |    | 1  |
|          | 15-Sep   |    | 2  | 3  |
| II       | SEPHS1   | 1  | 3  | 1  |
| II + III | SEPHS2   | 1  | 3  | 7  |
| II       | SEPN1    | 1  | 6  | 6  |
|          | SEPSECS  |    |    | 1  |
|          | 10-Sep   |    |    | 1  |
|          | 11-Sep   |    |    | 3  |
| III      | 2-Sep    |    | 2  |    |
| III      | 3-Sep    |    |    | 2  |
| III      | 6-Sep    |    |    | 1  |
| III      | 7-Sep    |    |    | 1  |
|          | 8-Sep    |    |    | 1  |
|          | 9-Sep    |    | 6  | 10 |
| II       | SEPW1    | 1  | 3  | 4  |
|          | SERAC1   |    |    |    |
| II       | SERBP1   | 2  | 5  | 8  |
| III      | SERF2    | 1  | 2  |    |
| III      | SERGEF   |    |    |    |
| III      | SERINC1  |    |    | 1  |
| III      | SERINC2  |    | 1  | 2  |
| II       | SERINC3  | 5  | 7  | 5  |
| III      | SERP1    | 2  |    | 1  |
| III      | SERPINB1 |    |    |    |
| II       | SERPINB6 | 1  | 2  | 3  |
| II + III | SERPINE1 | 5  | 17 | 10 |
| II       | SERPINE2 | 3  | 2  | 1  |
| II       | SERPINH1 | 2  | 6  | 8  |
| III      | SERPINI1 |    |    |    |
| II + III | SERTAD1  | 3  | 1  | 3  |
| II + III | SERTAD2  | 4  | 4  | 14 |
| II + III | SERTAD3  | 4  | 6  | 7  |
|          | SERTAD4  |    |    | 3  |
|          | SESN1    |    |    |    |
| II       | SESN2    | 1  | 1  | 6  |
|          | SESN3    |    |    | 1  |
|          | SESTD1   |    |    |    |
| II       | SET      | 3  | 6  | 7  |
| II       | SETD1A   | 1  | 3  | 9  |
| II + III | SETD1B   | 10 | 16 | 30 |
| II + III | SETD2    | 3  | 6  | 11 |
| II + III | SETD3    | 1  | 1  | 2  |
| III      | SETD4    |    |    | 1  |
| II       | SETD5    | 9  | 21 | 41 |
|          | SETD6    | 1  |    | 1  |
|          | SETD7    |    | 9  | 11 |
| III      | SETD8    |    | 3  | 2  |
| III      | SETD9    |    |    |    |

|          |         |   |    |    |
|----------|---------|---|----|----|
| II       | SETDB1  | 1 | 7  | 7  |
|          | SETDB2  |   |    | 3  |
|          | SETMAR  |   | 1  | 5  |
| II + III | SETX    | 5 | 7  | 11 |
| III      | SEZ6L2  |   | 1  | 1  |
| II       | SF1     | 5 | 8  | 15 |
| III      | SF3A1   |   | 1  | 3  |
| III      | SF3A2   |   | 2  | 2  |
| II       | SF3A3   | 2 | 4  | 5  |
|          | SF3B1   | 1 |    | 4  |
| III      | SF3B14  |   |    |    |
| II       | SF3B2   | 2 | 4  | 6  |
| II       | SF3B3   | 3 | 12 | 12 |
| II       | SF3B4   | 2 | 5  | 7  |
|          | SF3B5   | 2 |    | 3  |
| III      | SF11    |   |    |    |
|          | SFMBT1  |   | 4  | 6  |
|          | SFMBT2  |   |    | 5  |
|          | SFN     |   | 3  | 3  |
| II       | SFPQ    | 3 | 1  | 4  |
| III      | SFR1    |   |    |    |
| III      | SFSWAP  |   |    |    |
| III      | SFT2D1  |   | 1  | 1  |
| II + III | SFT2D2  | 1 | 1  | 1  |
|          | SFT2D3  |   |    | 1  |
| III      | SFXN1   |   |    | 3  |
| III      | SFXN2   |   |    |    |
| III      | SFXN3   |   |    |    |
| II       | SFXN4   | 1 | 1  | 1  |
| III      | SFXN5   |   |    | 1  |
| III      | SGCB    | 1 |    | 1  |
| III      | SGCE    |   |    | 1  |
| II       | SGK1    | 9 | 8  | 15 |
| II + III | SGK196  | 8 | 8  | 11 |
| II + III | SGK223  | 4 | 7  | 15 |
| II + III | SGMS1   | 2 | 6  | 10 |
| II + III | SGMS2   | 1 | 2  | 3  |
| III      | SGOL1   |   | 1  | 2  |
| III      | SGOL2   |   |    | 2  |
|          | SGPL1   |   | 1  | 1  |
| II + III | SGPP1   | 2 | 3  | 7  |
| II + III | SGSH    | 9 | 19 | 23 |
| III      | SGSM2   |   | 1  | 2  |
| III      | SGSM3   |   |    |    |
| II       | SGTA    | 3 | 4  | 4  |
| III      | SGTB    |   |    |    |
| III      | SH2B1   |   |    |    |
| III      | SH2D2A  |   |    | 1  |
| III      | SH2D3A  |   |    |    |
| II       | SH2D4A  | 1 | 1  | 5  |
| III      | SH3BGRL |   |    |    |

|          |          |    |    |    |
|----------|----------|----|----|----|
|          | SH3BGRL2 |    |    |    |
| II       | SH3BGRL3 | 1  | 1  | 2  |
| III      | SH3BP2   | 3  |    | 8  |
| II + III | SH3BP4   | 3  | 6  | 16 |
| II       | SH3BP5   | 1  | 1  | 3  |
| III      | SH3BP5L  |    | 1  | 8  |
|          | SH3D19   |    | 1  | 2  |
| III      | SH3GL1   |    | 2  | 2  |
| III      | SH3GL2   |    |    |    |
|          | SH3GLB1  |    |    | 1  |
| III      | SH3GLB2  |    | 1  | 3  |
| III      | SH3KBP1  |    |    |    |
| II + III | SH3PXD2A | 4  | 5  | 19 |
| II + III | SH3PXD2B | 5  | 6  | 13 |
|          | SH3RF1   |    |    | 4  |
|          | SH3RF2   |    |    | 1  |
| II + III | SH3TC1   | 2  | 4  | 16 |
| III      | SHARPIN  |    | 1  | 2  |
|          | SHB      |    | 2  | 4  |
| II       | SHC1     | 3  | 10 | 17 |
| III      | SHCBP1   |    | 1  | 1  |
| III      | SHFM1    |    |    |    |
| III      | SHISA4   |    |    | 1  |
| III      | SHISA5   |    | 3  | 5  |
| III      | SHKBP1   |    |    |    |
| III      | SHMT1    |    |    | 3  |
| II       | SHMT2    | 1  | 3  | 4  |
|          | SHOC2    |    | 1  |    |
| II + III | SHPK     | 2  | 1  | 8  |
|          | SHPRH    |    |    |    |
|          | SHQ1     |    | 1  | 1  |
| II       | SHROOM1  | 2  | 2  | 4  |
| II + III | SHROOM3  | 3  | 2  | 9  |
|          | SIAE     | 2  |    |    |
| II + III | SIAH1    | 1  | 1  | 8  |
| II + III | SIAH2    | 1  | 3  | 4  |
| III      | SIDT2    |    | 1  | 3  |
| III      | SIGIRR   |    |    |    |
| II       | SIGMAR1  | 1  | 9  | 4  |
| II + III | SIK1     | 10 | 4  | 17 |
|          | SIK2     | 3  |    | 8  |
| II + III | SIK3     | 4  | 2  | 7  |
| II       | SIKE1    | 1  | 1  | 1  |
| II       | SIL1     | 1  | 2  | 2  |
|          | SIM2     | 1  |    | 5  |
| II + III | SIN3A    | 2  | 7  | 12 |
|          | SIN3B    | 1  |    | 3  |
| II       | SIPA1    | 1  | 1  | 2  |
| II + III | SIPA1L1  | 1  | 1  | 3  |
|          | SIPA1L2  |    | 1  | 2  |
| II + III | SIPA1L3  | 2  | 3  | 10 |

|          |          |    |    |    |
|----------|----------|----|----|----|
|          | SIRT1    |    | 1  | 2  |
| III      | SIRT2    | 1  | 1  |    |
|          | SIRT3    |    | 1  | 2  |
|          | SIRT4    |    |    |    |
| III      | SIRT5    |    |    |    |
| III      | SIRT6    |    |    |    |
|          | SIRT7    |    | 1  | 2  |
| III      | SIVA1    |    |    |    |
|          | SIX1     |    | 1  | 4  |
| II       | SIX2     | 1  | 5  | 11 |
| II + III | SIX4     | 4  | 6  | 13 |
| II + III | SIX5     | 1  | 5  | 6  |
| III      | SKA1     |    |    | 4  |
| III      | SKA2     |    |    |    |
| III      | SKA3     |    | 1  | 2  |
| III      | SKAP2    |    |    |    |
| II       | SKI      | 5  | 9  | 16 |
| II + III | SKIL     | 3  | 3  | 8  |
| III      | SKIV2L   | 1  |    |    |
| III      | SKIV2L2  |    |    | 1  |
| III      | SKP1     |    |    |    |
|          | SKP2     |    |    | 1  |
| II       | SLAIN2   | 1  | 1  | 2  |
| III      | SLBP     |    | 1  | 5  |
| II + III | SLC10A3  | 5  | 16 | 20 |
| II + III | SLC11A2  | 1  | 2  | 5  |
|          | SLC12A2  |    | 1  | 4  |
|          | SLC12A6  |    |    | 1  |
| II + III | SLC12A7  | 13 | 21 | 29 |
| II       | SLC12A9  | 5  | 3  | 4  |
| II + III | SLC15A4  | 3  | 5  | 4  |
| II + III | SLC16A1  | 7  | 11 | 18 |
|          | SLC16A10 |    |    |    |
|          | SLC16A13 |    |    | 3  |
| II       | SLC16A3  | 18 | 18 | 26 |
| II + III | SLC16A5  | 1  | 2  | 7  |
|          | SLC16A7  |    |    |    |
|          | SLC16A9  |    | 1  | 5  |
| III      | SLC17A5  |    |    |    |
| III      | SLC18B1  |    |    |    |
| II       | SLC19A1  | 2  | 9  | 6  |
|          | SLC19A2  |    | 1  | 2  |
|          | SLC1A1   |    | 1  | 1  |
| II + III | SLC1A3   | 6  | 4  | 3  |
| II + III | SLC1A4   | 5  | 6  | 10 |
| II       | SLC1A5   | 10 | 18 | 19 |
|          | SLC20A1  |    | 3  | 6  |
| II       | SLC20A2  | 2  | 4  | 3  |
| III      | SLC22A18 |    |    | 2  |
| II + III | SLC22A23 | 3  | 4  | 6  |
|          | SLC22A4  |    | 1  | 3  |

|          |          |    |    |    |
|----------|----------|----|----|----|
| II       | SLC22A5  | 2  | 1  | 2  |
| II       | SLC23A2  | 1  | 3  | 4  |
|          | SLC24A6  |    | 1  | 3  |
| III      | SLC25A1  | 1  |    | 1  |
| III      | SLC25A10 | 2  |    | 1  |
| II       | SLC25A11 | 1  | 2  | 4  |
|          | SLC25A12 |    |    |    |
| III      | SLC25A13 |    | 1  | 1  |
| III      | SLC25A14 |    |    |    |
| III      | SLC25A15 |    |    |    |
|          | SLC25A16 |    |    |    |
| II       | SLC25A17 | 2  | 2  | 2  |
|          | SLC25A19 |    | 2  | 3  |
|          | SLC25A20 |    |    |    |
|          | SLC25A21 |    |    |    |
| II       | SLC25A22 | 1  | 2  | 2  |
| III      | SLC25A23 | 2  |    | 4  |
|          | SLC25A24 |    | 1  | 2  |
| II       | SLC25A25 | 1  | 4  | 5  |
| III      | SLC25A26 |    |    |    |
| II + III | SLC25A28 | 3  | 2  | 10 |
| II + III | SLC25A29 | 5  | 10 | 19 |
| II       | SLC25A3  | 3  | 3  | 3  |
|          | SLC25A30 |    | 1  | 2  |
|          | SLC25A32 |    |    | 2  |
| III      | SLC25A33 |    |    |    |
| II + III | SLC25A36 | 1  | 5  | 9  |
| II + III | SLC25A37 | 3  | 5  | 9  |
|          | SLC25A38 | 1  |    | 3  |
| II       | SLC25A39 | 3  | 1  | 2  |
| III      | SLC25A4  | 1  |    |    |
| III      | SLC25A40 |    |    |    |
| III      | SLC25A42 |    |    | 1  |
| II + III | SLC25A43 | 1  | 3  | 3  |
|          | SLC25A44 |    | 6  | 11 |
|          | SLC25A46 |    | 1  | 2  |
| II       | SLC25A5  | 2  | 2  | 3  |
| II       | SLC25A6  | 8  | 8  | 10 |
|          | SLC26A11 | 1  |    |    |
| II + III | SLC26A2  | 3  | 8  | 11 |
| III      | SLC26A6  | 1  |    | 1  |
| III      | SLC27A1  | 1  |    | 2  |
|          | SLC27A2  |    |    | 2  |
| II       | SLC27A4  | 4  | 9  | 9  |
| III      | SLC27A5  |    |    |    |
| II       | SLC29A1  | 1  | 8  | 8  |
| III      | SLC29A2  |    | 3  | 8  |
| II       | SLC2A1   | 10 | 13 | 12 |
| III      | SLC2A11  |    |    |    |
|          | SLC2A13  |    |    |    |
| II + III | SLC2A3   | 3  | 7  | 8  |

|          |          |   |    |    |
|----------|----------|---|----|----|
| II       | SLC2A4RG | 1 | 2  | 5  |
| II + III | SLC2A6   | 3 | 2  | 2  |
| III      | SLC2A8   | 1 |    | 2  |
| II + III | SLC30A1  | 3 | 3  | 10 |
| II       | SLC30A5  | 1 | 2  | 3  |
|          | SLC30A6  |   | 3  | 5  |
|          | SLC30A7  |   | 1  | 1  |
| III      | SLC30A9  | 1 |    | 2  |
| II       | SLC31A1  | 1 | 1  | 5  |
| II + III | SLC31A2  | 1 | 2  | 4  |
| II + III | SLC33A1  | 2 | 6  | 8  |
|          | SLC35A1  |   |    |    |
|          | SLC35A2  |   | 5  | 14 |
|          | SLC35A3  |   |    |    |
| II       | SLC35A4  | 6 | 10 | 21 |
| II + III | SLC35A5  | 1 | 2  | 2  |
| III      | SLC35B1  |   | 1  | 2  |
| II       | SLC35B2  | 3 | 7  | 15 |
|          | SLC35B3  |   |    | 1  |
| II + III | SLC35B4  | 3 | 1  | 8  |
| II + III | SLC35C1  | 3 | 8  | 11 |
| II       | SLC35C2  | 4 | 6  | 15 |
|          | SLC35D1  |   |    |    |
|          | SLC35D2  | 1 |    |    |
| II + III | SLC35E1  | 6 | 16 | 31 |
| II + III | SLC35E3  | 1 | 1  | 3  |
|          | SLC35E4  |   |    |    |
| II       | SLC35F2  | 3 | 5  | 5  |
| II       | SLC35F5  | 1 | 1  | 2  |
|          | SLC35G1  |   |    | 1  |
| II       | SLC36A1  | 1 | 3  | 4  |
| III      | SLC36A4  |   |    |    |
|          | SLC37A1  |   | 1  | 3  |
| II + III | SLC37A3  | 1 | 2  | 7  |
| III      | SLC37A4  |   | 2  | 5  |
| II       | SLC38A1  | 8 | 16 | 30 |
| II       | SLC38A10 | 5 | 7  | 18 |
| II + III | SLC38A2  | 7 | 10 | 20 |
| III      | SLC38A6  |   |    | 2  |
| II       | SLC38A7  | 2 | 4  | 8  |
| III      | SLC38A9  |   |    |    |
| II       | SLC39A1  | 7 | 10 | 13 |
| II + III | SLC39A10 | 1 | 4  | 5  |
| II + III | SLC39A11 | 1 | 3  | 4  |
| III      | SLC39A13 | 2 | 1  |    |
| II + III | SLC39A14 | 7 | 22 | 23 |
| II       | SLC39A3  | 2 | 3  | 5  |
| II       | SLC39A6  | 2 | 8  | 9  |
| II       | SLC39A7  | 8 | 12 | 14 |
| III      | SLC39A8  |   |    | 1  |
| II + III | SLC39A9  | 5 | 4  | 10 |



|          |          |    |    |    |
|----------|----------|----|----|----|
| II       | SLC3A2   | 10 | 17 | 13 |
| II       | SLC41A1  | 4  | 5  | 13 |
|          | SLC41A2  |    |    | 2  |
| III      | SLC41A3  | 2  | 3  |    |
| III      | SLC43A1  |    |    |    |
| II       | SLC43A2  | 8  | 6  | 8  |
|          | SLC44A1  | 1  |    |    |
| III      | SLC44A2  |    | 3  | 3  |
|          | SLC45A3  | 1  |    | 4  |
| II + III | SLC45A4  | 3  | 1  | 6  |
| III      | SLC47A1  |    |    | 1  |
| II       | SLC48A1  | 1  | 1  | 5  |
| III      | SLC4A1AP |    |    | 2  |
| II       | SLC4A2   | 3  | 7  | 5  |
|          | SLC4A7   |    | 2  | 2  |
| III      | SLC50A1  |    |    | 1  |
| II       | SLC52A2  | 6  | 3  | 6  |
|          | SLC5A3   | 2  |    | 7  |
| II       | SLC5A6   | 1  | 3  | 7  |
|          | SLC6A15  |    | 2  |    |
| II       | SLC6A6   | 4  | 10 | 12 |
| II       | SLC6A8   | 2  | 4  | 10 |
| II       | SLC6A9   | 3  | 10 | 9  |
| II + III | SLC7A1   | 11 | 28 | 48 |
| II + III | SLC7A11  | 1  | 3  | 5  |
| II + III | SLC7A2   | 1  | 3  | 6  |
| II       | SLC7A5   | 46 | 50 | 43 |
| II + III | SLC7A6   | 5  | 5  | 14 |
| III      | SLC7A6OS |    |    | 2  |
| III      | SLC9A1   |    | 2  | 9  |
|          | SLC9A3   |    |    |    |
|          | SLC9A3R1 |    | 2  | 4  |
| III      | SLC9A3R2 |    |    | 2  |
|          | SLC9A6   |    |    | 3  |
|          | SLC9A8   |    | 5  | 6  |
| II       | SLCO3A1  | 11 | 21 | 19 |
| II       | SLCO4A1  | 8  | 10 | 21 |
|          | SLFN12   |    |    | 2  |
|          | SLFN5    |    | 1  | 2  |
| III      | SLIRP    |    | 1  | 2  |
| III      | SLK      | 1  |    | 2  |
|          | SLMAP    |    | 1  | 2  |
| III      | SLMO1    |    |    | 3  |
| III      | SLMO2    |    | 4  | 4  |
| III      | SLPI     | 1  |    | 1  |
| III      | SLTM     |    |    |    |
| III      | SLU7     |    |    |    |
|          | SLX4     |    | 1  | 3  |
|          | SMAD1    |    |    | 5  |
| II + III | SMAD2    | 1  | 2  | 5  |
| II + III | SMAD3    | 6  | 7  | 17 |

|          |          |    |    |    |
|----------|----------|----|----|----|
| II + III | SMAD4    | 1  | 3  | 9  |
| II + III | SMAD5    | 2  | 10 | 15 |
| II + III | SMAD6    | 5  | 7  | 13 |
| II + III | SMAD7    | 1  | 4  | 5  |
|          | SMAGP    |    |    | 3  |
|          | SMAP1    |    | 2  | 1  |
| III      | SMAP2    |    | 1  | 2  |
|          | SMARCA1  |    |    |    |
| III      | SMARCA2  | 1  |    | 3  |
| III      | SMARCA4  | 2  |    | 2  |
|          | SMARCA5  |    | 2  | 2  |
|          | SMARCAD1 |    | 1  | 1  |
|          | SMARCAL1 |    |    |    |
| III      | SMARCB1  |    | 1  | 1  |
| III      | SMARCC1  |    | 4  | 7  |
| III      | SMARCC2  | 1  |    | 3  |
| II       | SMARCD1  | 3  | 4  | 5  |
| III      | SMARCD2  |    |    |    |
| III      | SMARCD3  |    | 1  |    |
| III      | SMARCE1  |    |    | 1  |
| II       | SMC1A    | 4  | 8  | 14 |
| III      | SMC2     |    | 3  | 2  |
| III      | SMC3     |    | 1  | 2  |
| III      | SMC4     |    |    | 1  |
| III      | SMC5     |    |    | 1  |
| III      | SMC6     |    |    | 1  |
|          | SMCHD1   | 1  |    |    |
|          | SMCR7    |    | 4  | 2  |
| II + III | SMCR7L   | 4  | 3  | 12 |
| II + III | SMCR8    | 15 | 19 | 39 |
| II + III | SMEK1    | 3  | 4  | 7  |
|          | SMEK2    |    | 2  | 6  |
| II + III | SMG1     | 2  | 1  | 5  |
| II       | SMG5     | 1  | 5  | 14 |
|          | SMG6     |    | 3  | 9  |
| II       | SMG7     | 4  | 3  | 15 |
| II + III | SMG8     | 3  | 6  | 10 |
| III      | SMG9     |    | 1  |    |
| II       | SMNDC1   | 1  | 1  | 1  |
| II       | SMOC1    | 1  | 7  | 4  |
| III      | SMOX     |    | 1  |    |
| II + III | SMPD1    | 3  | 7  | 7  |
| III      | SMPD2    |    |    |    |
| II       | SMPD4    | 1  | 2  | 8  |
| III      | SMPDL3A  |    |    |    |
| III      | SMS      | 1  |    | 1  |
| III      | SMTN     |    |    | 1  |
| III      | SMU1     | 1  | 1  |    |
|          | SMUG1    | 1  |    | 1  |
| II + III | SMURF1   | 1  | 5  | 6  |
|          | SMURF2   |    |    | 3  |

|          |          |   |   |   |
|----------|----------|---|---|---|
| III      | SMYD2    | 1 |   |   |
| III      | SMYD3    |   |   | 1 |
|          | SMYD4    |   |   |   |
| II       | SMYD5    | 1 | 5 | 8 |
| III      | SNAI1    |   | 2 | 5 |
| III      | SNAP23   |   |   |   |
| III      | SNAP25   |   |   |   |
| III      | SNAP29   |   |   |   |
| II + III | SNAP47   | 4 | 2 | 7 |
| III      | SNAPC1   |   | 1 | 2 |
| II       | SNAPC2   | 1 | 1 | 2 |
| III      | SNAPC3   |   |   | 2 |
| II       | SNAPC4   | 5 | 1 | 9 |
|          | SNAPC5   |   |   | 2 |
| III      | SNAPIN   |   |   |   |
| II       | SND1     | 1 | 2 | 5 |
| III      | SNF8     |   |   | 1 |
| III      | SNHG1    |   | 1 | 4 |
| II       | SNHG10   | 1 | 2 | 1 |
| III      | SNHG11   |   | 1 | 1 |
| III      | SNHG12   |   |   |   |
| III      | SNHG15   |   |   | 1 |
| III      | SNHG5    |   |   |   |
| III      | SNHG6    |   |   |   |
| III      | SNHG8    |   |   |   |
| III      | SNHG9    |   |   |   |
|          | SNIP1    |   | 1 | 4 |
|          | SNRK     | 2 |   | 6 |
| II       | SNRNP200 | 4 | 2 | 3 |
| III      | SNRNP25  |   | 1 | 2 |
| III      | SNRNP27  |   |   | 1 |
|          | SNRNP35  |   | 1 | 1 |
| III      | SNRNP40  |   | 2 | 1 |
| III      | SNRNP48  |   | 4 | 6 |
| II       | SNRNP70  | 3 | 3 | 3 |
| III      | SNRPA    |   | 2 | 1 |
| III      | SNRPA1   |   | 1 |   |
| III      | SNRPB    |   |   | 4 |
| III      | SNRPB2   |   | 1 | 1 |
| II       | SNRPC    | 1 | 1 | 2 |
| III      | SNRPD1   |   | 1 | 1 |
| III      | SNRPD2   |   | 1 | 2 |
| III      | SNRPD3   |   | 1 | 1 |
| III      | SNRPE    |   | 1 |   |
| II       | SNRPF    | 1 | 1 | 1 |
| III      | SNRPG    |   |   |   |
| III      | SNTA1    |   |   | 1 |
|          | SNTB1    |   |   |   |
|          | SNTB2    |   | 2 | 6 |
|          | SNUPN    |   |   |   |
| III      | SNW1     |   |   |   |

|          |        |    |    |    |
|----------|--------|----|----|----|
| III      | SNX1   |    |    | 1  |
| III      | SNX10  |    |    |    |
| III      | SNX11  |    |    | 3  |
| II       | SNX12  | 1  | 6  | 4  |
| II + III | SNX13  | 1  | 2  | 4  |
| III      | SNX14  |    |    | 2  |
| III      | SNX17  |    | 1  | 1  |
|          | SNX18  | 2  |    | 3  |
| II + III | SNX19  | 4  | 3  | 10 |
| II       | SNX2   | 1  | 1  | 1  |
|          | SNX21  |    | 1  | 5  |
|          | SNX24  |    |    |    |
|          | SNX25  |    |    |    |
| II       | SNX27  | 1  | 4  | 7  |
| III      | SNX3   |    |    | 1  |
|          | SNX30  |    | 2  | 1  |
| II + III | SNX33  | 2  | 4  | 17 |
| III      | SNX4   |    |    |    |
| III      | SNX5   |    | 3  | 1  |
| III      | SNX6   |    | 1  |    |
| II       | SNX8   | 4  | 1  | 6  |
| II       | SNX9   | 1  | 1  | 3  |
| II       | SOAT1  | 2  | 4  | 6  |
| II + III | SOCS2  | 1  | 3  | 7  |
| II + III | SOCS3  | 7  | 16 | 25 |
| II + III | SOCS4  | 2  | 3  | 9  |
|          | SOCS6  |    | 1  | 5  |
| III      | SOCS7  |    | 1  | 1  |
| III      | SOD1   | 1  |    | 1  |
| III      | SOD2   |    |    |    |
| II       | SOGA1  | 10 | 27 | 39 |
|          | SOGA2  |    | 2  | 12 |
| II       | SOLH   | 4  | 1  | 10 |
| II + III | SON    | 15 | 18 | 36 |
| III      | SORBS2 |    |    |    |
| II       | SORBS3 | 1  | 1  | 2  |
| III      | SORD   |    | 1  | 2  |
| III      | SORT1  |    | 1  | 3  |
| II       | SOS1   | 2  | 2  | 7  |
|          | SOS2   |    | 2  | 2  |
| II + III | SOWAHC | 5  | 5  | 13 |
| II       | SOX12  | 3  | 8  | 15 |
| II       | SOX13  | 1  | 2  | 6  |
| II + III | SOX4   | 9  | 12 | 24 |
|          | SOX9   |    |    | 1  |
| II + III | SP1    | 3  | 10 | 18 |
| III      | SP100  |    |    |    |
| III      | SP2    |    | 2  | 5  |
| II + III | SP3    | 4  | 2  | 8  |
|          | SP4    |    | 2  | 3  |
| III      | SPA17  |    |    |    |

|          |          |   |    |    |
|----------|----------|---|----|----|
| III      | SPAG1    |   |    |    |
| III      | SPAG4    |   |    |    |
| II       | SPAG5    | 1 | 4  | 6  |
| III      | SPAG7    |   |    |    |
|          | SPAG9    |   | 2  | 5  |
|          | SPAST    |   |    | 1  |
| II + III | SPATA13  | 2 | 2  | 5  |
| III      | SPATA17  |   |    |    |
| II + III | SPATA2   | 1 | 7  | 18 |
| III      | SPATA20  |   | 1  |    |
| III      | SPATA24  |   |    |    |
|          | SPATA2L  |   | 1  | 1  |
|          | SPATA5   | 1 |    | 1  |
|          | SPATA5L1 |   | 1  |    |
|          | SPATA7   |   |    | 1  |
|          | SPATS2   |   | 2  | 4  |
| III      | SPATS2L  |   |    |    |
|          | SPC24    |   |    | 1  |
| III      | SPC25    |   |    |    |
| II       | SPCS1    | 1 | 2  | 1  |
| III      | SPCS2    |   |    | 1  |
| III      | SPCS3    |   |    | 1  |
| II + III | SPECC1   | 7 | 4  | 10 |
|          | SPECC1L  | 1 |    | 11 |
| II       | SPEN     | 3 | 10 | 24 |
|          | SPG11    |   | 1  | 3  |
| II + III | SPG20    | 1 | 1  | 4  |
| III      | SPG21    |   |    |    |
| II       | SPG7     | 1 | 4  | 6  |
| II       | SPHK1    | 2 | 3  | 1  |
| II       | SPHK2    | 2 | 1  | 2  |
|          | SPICE1   |   |    |    |
| II + III | SPIN1    | 5 | 7  | 13 |
|          | SPIN2B   |   |    |    |
|          | SPIN3    | 1 |    | 2  |
|          | SPIN4    |   | 1  | 2  |
| III      | SPINK4   |   |    |    |
|          | SPIRE1   |   | 4  | 2  |
| III      | SPIRE2   |   | 2  | 7  |
| III      | SPNS1    | 1 |    | 1  |
|          | SPOP     |   |    | 6  |
| II + III | SPPL2A   | 1 | 1  | 1  |
| II       | SPPL2B   | 1 | 3  | 6  |
| II + III | SPPL3    | 2 | 2  | 5  |
| III      | SPR      |   |    | 3  |
|          | SPRED1   |   |    | 3  |
| II + III | SPRED2   | 5 | 11 | 21 |
|          | SPRY2    |   |    | 2  |
| III      | SPRYD3   |   | 2  | 3  |
| III      | SPRYD4   |   |    |    |
| III      | SPRYD7   |   | 1  |    |

|          |          |    |    |    |
|----------|----------|----|----|----|
| II + III | SPSB1    | 4  | 3  | 14 |
|          | SPSB2    |    |    | 3  |
| III      | SPSB3    |    |    | 1  |
| II       | SPTAN1   | 1  | 3  | 3  |
| II + III | SPTBN1   | 6  | 5  | 7  |
|          | SPTBN2   |    |    |    |
| III      | SPTLC1   |    |    |    |
|          | SPTLC2   |    | 1  | 4  |
| III      | SPTSSA   |    |    |    |
|          | SPTY2D1  |    |    | 4  |
| II + III | SQLE     | 1  | 2  | 5  |
| III      | SQRDL    |    |    |    |
| II       | SQSTM1   | 9  | 9  | 21 |
| II       | SRA1     | 2  | 4  | 8  |
|          | SRBD1    |    |    | 3  |
| II       | SRC      | 1  | 1  | 6  |
| II       | SRCAP    | 17 | 35 | 74 |
| III      | SRD5A1   |    |    | 2  |
| III      | SRD5A3   |    |    |    |
| II       | SREBF1   | 5  | 4  | 6  |
| II       | SREBF2   | 2  | 1  | 5  |
| II       | SREK1    | 1  | 1  | 1  |
| III      | SREK1IP1 |    |    |    |
| III      | SRF      |    | 4  | 3  |
|          | SRFBP1   |    | 1  | 2  |
|          | SRGAP1   |    | 6  | 4  |
| II + III | SRGAP2   | 2  | 3  | 14 |
| III      | SRGN     |    |    |    |
| III      | SRI      |    |    | 1  |
| III      | SRM      |    |    | 7  |
| III      | SRP14    |    | 1  | 1  |
|          | SRP19    |    | 1  | 2  |
| III      | SRP54    |    |    | 1  |
| II       | SRP68    | 1  | 1  | 4  |
| III      | SRP72    |    | 1  | 3  |
| III      | SRP9     |    | 1  | 2  |
| II       | SRPK1    | 2  | 2  | 8  |
|          | SRPK2    | 1  |    |    |
| II       | SRPR     | 2  | 7  | 7  |
| II       | SRPRB    | 1  | 1  | 2  |
| III      | SRPX     |    |    |    |
|          | SRR      |    |    |    |
|          | SRRD     |    |    | 2  |
| II       | SRRM1    | 1  | 4  | 4  |
| II       | SRRM2    | 22 | 36 | 41 |
|          | SRRM3    |    | 2  | 2  |
| III      | SRRT     |    |    | 4  |
| II       | SRSF1    | 1  | 2  | 6  |
| III      | SRSF10   |    |    | 1  |
| II       | SRSF11   | 2  | 2  | 1  |
| II       | SRSF2    | 2  | 6  | 7  |

|          |            |   |    |    |
|----------|------------|---|----|----|
| II       | SRSF3      | 1 | 1  | 2  |
| III      | SRSF4      |   |    | 4  |
| II       | SRSF5      | 1 | 4  | 7  |
| III      | SRSF6      | 1 |    | 3  |
| III      | SRSF7      |   |    |    |
|          | SRSF8      |   |    | 2  |
| III      | SRSF9      | 1 |    | 2  |
| II + III | SRXN1      | 4 | 10 | 16 |
| II       | SS18       | 2 | 5  | 5  |
|          | SS18L1     |   |    | 5  |
| III      | SS18L2     |   |    |    |
| III      | SSB        |   |    | 1  |
| III      | SSBP1      |   |    |    |
| III      | SSBP3      | 1 |    | 1  |
| III      | SSBP4      |   | 1  | 3  |
|          | SSFA2      |   | 1  | 5  |
| II       | SSH1       | 1 | 2  | 17 |
| II + III | SSH2       | 2 | 6  | 13 |
| III      | SSH3       |   | 2  | 2  |
| II       | SSNA1      | 1 | 1  | 1  |
| II       | SSR1       | 3 | 9  | 8  |
| II       | SSR2       | 1 | 7  | 7  |
| III      | SSR3       |   | 3  | 3  |
| II       | SSR4       | 2 | 2  | 3  |
| II       | SSRP1      | 2 | 4  | 4  |
| III      | SSSCA1     |   |    | 1  |
| III      | SSU72      |   | 2  | 4  |
| III      | SSX2IP     |   | 2  | 2  |
| II + III | ST3GAL2    | 7 | 11 | 19 |
|          | ST3GAL3    |   | 1  |    |
| III      | ST3GAL4    |   |    | 1  |
| II       | ST5        | 2 | 1  | 3  |
|          | ST6GAL1    |   | 1  | 6  |
| II       | ST6GALNAC4 | 2 | 3  | 12 |
| III      | ST6GALNAC6 |   | 2  | 3  |
| III      | ST7        |   | 3  | 2  |
| III      | ST7L       | 1 | 1  |    |
| III      | STAC       |   |    | 1  |
|          | STAG1      |   | 1  | 2  |
|          | STAG2      |   |    | 3  |
| III      | STAG3L2    |   |    | 3  |
| III      | STAG3L4    |   |    |    |
| II       | STAM       | 2 | 2  | 4  |
| III      | STAM2      |   | 1  | 2  |
| III      | STAMPB     |   | 1  |    |
| III      | STAMBPL1   |   |    | 1  |
| III      | STARD10    |   |    |    |
|          | STARD13    |   |    | 1  |
| II       | STARD3     | 1 | 2  | 2  |
| III      | STARD3NL   |   | 1  | 2  |
|          | STARD4     |   |    | 1  |

|          |         |    |    |    |
|----------|---------|----|----|----|
| II + III | STARD7  | 1  | 5  | 9  |
|          | STARD8  |    |    |    |
| III      | STAT1   |    | 2  | 3  |
|          | STAT2   |    |    | 1  |
| III      | STAT3   |    |    | 1  |
| III      | STAT5A  |    |    |    |
|          | STAT5B  |    | 3  | 4  |
| III      | STAT6   |    | 3  | 4  |
| II + III | STAU1   | 3  | 10 | 9  |
| III      | STAU2   |    |    | 1  |
| III      | STC1    |    | 1  | 1  |
| II       | STC2    | 10 | 27 | 34 |
| II       | STEAP3  | 1  | 4  | 5  |
| II + III | STIL    | 2  | 2  | 2  |
| III      | STIM1   |    | 3  | 4  |
|          | STIM2   |    | 4  | 10 |
| II       | STIP1   | 1  | 2  | 4  |
|          | STK10   |    | 1  | 3  |
| III      | STK11IP |    |    |    |
|          | STK16   |    |    | 1  |
|          | STK17A  |    | 1  | 1  |
| II       | STK17B  | 1  | 1  | 3  |
| III      | STK19   |    |    |    |
| III      | STK24   |    |    | 1  |
| II       | STK25   | 2  | 1  | 2  |
|          | STK3    |    |    | 1  |
| III      | STK32B  | 1  |    | 4  |
| III      | STK32C  | 1  |    |    |
| II + III | STK35   | 3  | 5  | 13 |
|          | STK36   |    | 1  | 3  |
|          | STK38   |    | 3  | 3  |
|          | STK38L  | 1  |    | 1  |
| III      | STK39   |    |    |    |
| II       | STK4    | 1  | 3  | 4  |
| III      | STK40   |    | 1  | 5  |
| III      | STMN1   |    | 3  | 4  |
| III      | STMN3   |    |    |    |
| II       | STOM    | 6  | 5  | 8  |
| III      | STOML2  | 1  | 2  |    |
|          | STON2   |    | 3  | 6  |
|          | STOX2   | 1  |    | 3  |
| II       | STRA13  | 3  | 1  | 6  |
|          | STRADA  |    |    | 3  |
| III      | STRAP   |    | 5  | 5  |
| III      | STRBP   |    |    | 1  |
|          | STRN    |    | 2  |    |
| II       | STRN3   | 1  | 1  | 2  |
| III      | STRN4   | 1  |    | 2  |
| II       | STT3A   | 3  | 2  | 6  |
| II       | STT3B   | 4  | 4  | 3  |
| III      | STUB1   |    |    |    |



|          |         |   |    |    |
|----------|---------|---|----|----|
| III      | STX10   |   |    | 1  |
| III      | STX12   |   |    |    |
| II       | STX16   | 2 | 1  | 6  |
| III      | STX17   |   |    | 3  |
| III      | STX18   |   | 2  |    |
| III      | STX1A   |   |    |    |
|          | STX2    |   |    |    |
| III      | STX3    |   |    |    |
| III      | STX4    |   |    |    |
| III      | STX5    |   |    |    |
| II + III | STX6    | 3 | 2  | 8  |
| III      | STX7    |   |    |    |
| III      | STX8    |   |    |    |
| II       | STXBP1  | 1 | 3  | 4  |
| III      | STXBP2  |   |    |    |
| III      | STXBP3  |   |    |    |
|          | STXBP4  |   |    | 1  |
|          | STXBP5  |   | 1  | 1  |
| III      | STXBP6  |   |    | 1  |
| II       | STYX    | 1 | 2  | 5  |
| III      | STYXL1  |   | 1  |    |
| II       | SUB1    | 1 | 2  | 4  |
| III      | SUCLA2  |   | 2  | 3  |
| III      | SUCLG1  |   |    | 1  |
|          | SUCLG2  |   |    | 3  |
| III      | SUDS3   |   |    | 1  |
| II       | SUFU    | 1 | 1  | 3  |
| III      | SUGP1   |   |    |    |
| II + III | SUGP2   | 2 | 7  | 10 |
| III      | SUGT1   |   |    |    |
|          | SUGT1P1 |   |    |    |
|          | SULF2   |   |    |    |
| III      | SULT1A1 |   |    | 1  |
|          | SUMF1   | 1 |    |    |
| III      | SUMF2   |   | 2  | 4  |
|          | SUMO1   |   |    |    |
| III      | SUMO2   |   | 2  | 1  |
| II       | SUMO3   | 1 | 1  | 5  |
| II       | SUN1    | 3 | 2  | 5  |
| III      | SUN2    |   | 1  | 1  |
|          | SUOX    |   | 1  | 3  |
| II       | SUPT16H | 1 | 1  | 5  |
| III      | SUPT3H  |   |    |    |
| III      | SUPT4H1 |   | 2  | 3  |
| III      | SUPT5H  |   | 1  | 1  |
| II       | SUPT6H  | 1 | 3  | 4  |
|          | SUPT7L  |   |    | 2  |
| III      | SUPV3L1 |   |    | 1  |
| III      | SURF1   |   |    |    |
| III      | SURF2   |   |    |    |
| II       | SURF4   | 8 | 19 | 17 |

|          |          |   |   |    |
|----------|----------|---|---|----|
| II       | SURF6    | 4 | 6 | 9  |
|          | SUSD1    |   |   | 1  |
|          | SUV39H1  |   |   | 6  |
|          | SUV39H2  |   | 2 | 3  |
| II       | SUV420H1 | 1 | 1 | 2  |
|          | SUV420H2 |   | 1 | 1  |
|          | SUZ12    |   | 1 | 2  |
| III      | SUZ12P1  |   | 1 | 1  |
|          | SV2B     | 1 |   | 1  |
|          | SVEP1    |   | 1 | 1  |
|          | SVIL     | 2 |   | 1  |
| III      | SVIP     |   |   |    |
| III      | SVOPL    |   |   |    |
| III      | SWAP70   |   | 3 | 5  |
| III      | SWI5     |   |   |    |
|          | SWSAP1   |   |   |    |
| III      | SYAP1    |   |   |    |
|          | SYBU     |   |   |    |
| III      | SYCE2    |   |   |    |
| II + III | SYDE1    | 8 | 8 | 17 |
| II + III | SYDE2    | 1 | 2 | 2  |
| III      | SYF2     |   |   |    |
| II       | SYMPK    | 2 | 4 | 5  |
| II       | SYNCRIP  | 1 | 2 | 4  |
| III      | SYNGR1   |   |   |    |
| II       | SYNGR2   | 2 | 3 | 6  |
|          | SYNGR3   | 1 |   | 1  |
|          | SYNJ1    | 2 |   | 3  |
| II + III | SYNJ2    | 1 | 2 | 8  |
| II       | SYNM     | 1 | 1 | 4  |
|          | SYNPO    |   | 2 | 7  |
| II + III | SYNRG    | 1 | 1 | 10 |
| III      | SYPL1    | 2 | 4 |    |
|          | SYT12    |   | 4 | 4  |
|          | SYT17    |   |   | 1  |
| II       | SYVN1    | 2 | 6 | 8  |
| III      | SZT2     | 1 |   | 5  |
|          | TAB1     | 1 |   | 4  |
| II + III | TAB2     | 5 | 5 | 16 |
|          | TAB3     |   | 2 | 2  |
|          | TACC1    |   | 1 | 4  |
| II       | TACC2    | 2 | 3 | 3  |
| II       | TACC3    | 1 | 2 | 6  |
| III      | TACO1    |   |   |    |
| III      | TADA1    |   |   |    |
| III      | TADA2A   |   |   |    |
| II + III | TADA2B   | 2 | 4 | 15 |
| III      | TADA3    | 1 |   | 4  |
|          | TAF1     |   | 1 | 5  |
| III      | TAF10    | 1 |   | 1  |
|          | TAF11    |   | 1 |    |

|          |          |   |    |    |
|----------|----------|---|----|----|
| III      | TAF12    |   |    | 4  |
| III      | TAF13    |   |    |    |
| III      | TAF15    |   |    | 1  |
| III      | TAF1A    |   |    | 1  |
|          | TAF1B    |   |    |    |
| II + III | TAF1C    | 4 | 6  | 14 |
| III      | TAF1D    |   | 1  | 3  |
|          | TAF2     |   |    |    |
| III      | TAF3     |   |    | 1  |
| II       | TAF4     | 3 | 4  | 9  |
|          | TAF4B    |   | 1  | 2  |
|          | TAF5     |   |    |    |
| II + III | TAF5L    | 4 | 7  | 18 |
| III      | TAF6     |   |    | 1  |
|          | TAF6L    |   | 1  | 3  |
| II + III | TAF7     | 1 | 3  | 7  |
|          | TAF8     |   |    | 4  |
| III      | TAF9     |   | 2  | 5  |
| III      | TAF9B    |   | 2  | 2  |
| II       | TAGLN2   | 3 | 6  | 10 |
| II       | TALDO1   | 1 | 2  | 2  |
| III      | TAMM41   | 1 |    | 2  |
|          | TANC1    | 1 |    | 1  |
| II + III | TANC2    | 2 | 5  | 19 |
| II + III | TANK     | 1 | 1  | 1  |
| II       | TAOK1    | 1 | 3  | 9  |
| III      | TAOK2    |   |    | 1  |
| III      | TAOK3    |   |    | 1  |
| II       | TAP1     | 1 | 1  | 2  |
| II       | TAP2     | 3 | 5  | 5  |
| II       | TAPBP    | 6 | 10 | 11 |
| II + III | TAPT1    | 1 | 4  | 4  |
|          | TARBP1   |   |    |    |
| III      | TARBP2   |   | 1  | 4  |
|          | TARDBP   |   | 1  | 3  |
| II       | TARS     | 1 | 1  | 2  |
| II       | TARS2    | 2 | 2  | 3  |
|          | TARSL2   |   |    | 1  |
|          | TASP1    |   |    |    |
| III      | TATDN1   |   |    |    |
| II + III | TATDN2   | 5 | 11 | 22 |
| III      | TATDN3   |   |    | 1  |
| III      | TAX1BP1  | 2 |    | 3  |
| II       | TAZ      | 1 | 1  | 3  |
|          | TBC1D1   |   |    |    |
| III      | TBC1D10A |   |    | 1  |
| II       | TBC1D10B | 3 | 6  | 16 |
|          | TBC1D12  |   |    | 1  |
| II       | TBC1D13  | 3 | 2  | 8  |
| II + III | TBC1D14  | 5 | 8  | 18 |
| III      | TBC1D15  |   |    |    |

|          |          |   |   |    |
|----------|----------|---|---|----|
| II + III | TBC1D16  | 2 | 2 | 5  |
| III      | TBC1D17  |   |   | 1  |
| III      | TBC1D19  |   |   | 1  |
|          | TBC1D2   |   | 1 | 1  |
|          | TBC1D20  |   |   | 3  |
| III      | TBC1D22A |   |   |    |
|          | TBC1D22B |   | 1 | 1  |
|          | TBC1D23  | 1 |   | 2  |
| II + III | TBC1D24  | 2 | 4 | 12 |
|          | TBC1D25  |   | 2 | 8  |
| II       | TBC1D2B  | 2 | 1 | 4  |
|          | TBC1D30  |   | 2 | 2  |
| II + III | TBC1D4   | 1 | 1 | 2  |
| III      | TBC1D5   |   | 1 | 1  |
| III      | TBC1D7   |   |   |    |
|          | TBC1D8   |   |   | 1  |
| II + III | TBC1D9   | 2 | 1 | 2  |
| II + III | TBC1D9B  | 6 | 2 | 11 |
| III      | TBCA     |   |   |    |
| III      | TBCB     |   |   | 1  |
| II + III | TBCC     | 2 | 3 | 3  |
|          | TBCCD1   | 1 |   | 2  |
| III      | TBCD     |   | 1 | 1  |
| III      | TBCE     |   |   |    |
|          | TBCEL    |   |   | 2  |
|          | TBCK     |   |   | 2  |
| III      | TBK1     |   |   |    |
| III      | TBKBP1   |   | 1 | 1  |
| II + III | TBL1X    | 3 | 3 | 12 |
|          | TBL1XR1  | 1 |   | 5  |
| II       | TBL2     | 3 | 2 | 5  |
| III      | TBL3     |   |   | 2  |
| II       | TBP      | 2 | 1 | 1  |
| III      | TBPL1    |   |   |    |
| III      | TBRG1    |   | 1 | 6  |
| II       | TBRG4    | 1 | 1 | 3  |
| II       | TBX1     | 2 | 1 | 1  |
| II + III | TBX3     | 2 | 6 | 10 |
| III      | TBXA2R   |   |   |    |
| III      | TCEA1    |   |   | 1  |
| II       | TCEA2    | 1 | 1 | 4  |
| III      | TCEA3    |   |   |    |
| III      | TCEAL1   |   |   |    |
| III      | TCEAL4   |   |   |    |
| III      | TCEAL8   | 1 |   |    |
|          | TCEANC2  |   |   | 2  |
| III      | TCEB1    |   |   |    |
| III      | TCEB2    |   |   | 1  |
|          | TCEB3    |   | 2 | 4  |
| II       | TCERG1   | 2 | 4 | 6  |
| II + III | TCF12    | 1 | 2 | 5  |

|          |         |   |   |    |
|----------|---------|---|---|----|
| II + III | TCF19   | 5 | 2 | 10 |
| II + III | TCF20   | 2 | 3 | 15 |
| III      | TCF25   |   | 1 |    |
| II       | TCF3    | 1 | 3 | 11 |
|          | TCF4    |   | 2 | 4  |
| III      | TCF7L2  |   |   | 1  |
| II       | TCFL5   | 1 | 1 | 5  |
| III      | TCHP    |   |   | 2  |
| III      | TCIRG1  |   |   |    |
| III      | TCOF1   | 3 |   | 3  |
| III      | TCP1    |   | 2 | 6  |
|          | TCP11L1 |   |   |    |
| III      | TCTA    |   |   |    |
| III      | TCTN1   |   |   |    |
| III      | TCTN2   |   |   |    |
|          | TCTN3   | 1 |   | 4  |
|          | TDG     |   | 1 | 3  |
|          | TDP1    |   | 1 | 3  |
| III      | TDP2    |   | 2 |    |
| III      | TDRD3   |   |   | 1  |
|          | TDRD7   |   |   |    |
|          | TDRD9   |   |   | 1  |
| III      | TDRKH   |   |   |    |
| II + III | TEAD1   | 3 | 9 | 17 |
| III      | TEAD2   |   | 1 | 5  |
| III      | TEAD3   |   | 1 | 1  |
| II       | TEAD4   | 1 | 1 | 2  |
|          | TECPR1  |   |   |    |
| III      | TECR    | 2 | 1 |    |
|          | TEF     |   | 1 | 1  |
|          | TEFM    |   |   |    |
| II       | TEKT4P2 | 1 | 6 | 10 |
| II       | TELO2   | 1 | 1 | 1  |
| III      | TENC1   |   | 1 |    |
|          | TEP1    |   |   | 1  |
|          | TERF2   |   | 1 | 8  |
| III      | TERF2IP | 1 |   |    |
|          | TES     | 1 |   | 2  |
| III      | TESC    |   |   |    |
| II       | TESK1   | 2 | 2 | 9  |
| II + III | TET3    | 3 | 8 | 16 |
| II + III | TEX10   | 1 | 3 | 6  |
| II + III | TEX2    | 5 | 7 | 9  |
| II       | TEX261  | 2 | 1 | 7  |
| II       | TEX264  | 3 | 4 | 3  |
| III      | TEX30   |   |   | 1  |
| III      | TFAM    |   |   | 1  |
| III      | TFAP2A  | 2 |   | 6  |
|          | TFAP2C  |   | 1 | 4  |
| III      | TFAP4   |   | 1 | 1  |
|          | TFB1M   |   |   | 2  |

|          |          |   |    |    |
|----------|----------|---|----|----|
|          | TFB2M    |   |    |    |
|          | TFCP2    | 1 |    | 1  |
| III      | TFDP1    |   | 3  | 3  |
| III      | TFDP2    |   |    |    |
| II       | TFE3     | 2 | 6  | 7  |
| II       | TFEB     | 1 | 1  | 4  |
| II       | TFG      | 2 | 2  | 3  |
|          | TFIP11   |   |    | 3  |
| III      | TFPT     |   |    |    |
| II + III | TFRC     | 5 | 7  | 11 |
| III      | TGDS     |   |    |    |
| II       | TGFB1    | 3 | 6  | 7  |
| III      | TGFB111  |   |    | 2  |
| II + III | TGFBR1   | 1 | 4  | 5  |
|          | TGFBR2   |   | 2  | 4  |
|          | TGFBR3   |   | 1  | 2  |
|          | TGFBRAP1 |   | 2  | 1  |
|          | TGIF1    |   |    | 9  |
| II + III | TGIF2    | 2 | 4  | 9  |
| II       | TGOLN2   | 4 | 9  | 11 |
| II       | TGS1     | 1 | 1  | 4  |
| II       | TH1L     | 1 | 3  | 9  |
| II + III | THADA    | 1 | 1  | 3  |
|          | THAP1    |   |    |    |
|          | THAP10   |   |    |    |
| II + III | THAP11   | 4 | 7  | 12 |
|          | THAP2    |   |    | 2  |
|          | THAP3    |   | 1  | 1  |
| II       | THAP4    | 3 | 4  | 5  |
|          | THAP5    |   |    | 1  |
| III      | THAP6    |   |    |    |
| II + III | THAP7    | 2 | 1  | 5  |
|          | THAP9    |   |    | 1  |
| II + III | THBS1    | 9 | 14 | 16 |
| III      | THBS3    |   |    |    |
| II       | THEM6    | 1 | 2  | 7  |
|          | THG1L    |   |    |    |
|          | THNSL1   |   |    |    |
| III      | THOC1    |   |    |    |
| III      | THOC2    |   | 1  | 1  |
| III      | THOC3    |   |    | 1  |
| III      | THOC5    |   | 1  | 2  |
| III      | THOC6    |   |    |    |
| III      | THOC7    |   |    |    |
| II       | THOP1    | 1 | 3  | 2  |
| III      | THRA     |   | 1  | 2  |
| III      | THRAP3   |   | 2  | 6  |
| III      | THTPA    |   |    | 1  |
| II + III | THUMPD1  | 1 | 3  | 5  |
| III      | THUMPD2  |   |    | 1  |
|          | THUMPD3  |   | 1  | 3  |

|          |          |    |   |    |
|----------|----------|----|---|----|
| III      | THYN1    |    | 1 |    |
| III      | TIA1     |    |   |    |
| II       | TIAL1    | 1  | 2 | 5  |
|          | TIAM1    |    | 1 | 2  |
| II + III | TICAM1   | 2  | 5 | 14 |
|          | TIFA     |    |   |    |
|          | TIGD1    |    |   |    |
|          | TIGD2    |    |   |    |
| II + III | TIGD5    | 1  | 5 | 8  |
|          | TIGD6    | 1  |   | 2  |
|          | TIGD7    |    |   | 1  |
| III      | TIMELESS |    |   |    |
| III      | TIMM10   |    |   |    |
| II       | TIMM13   | 3  | 1 | 2  |
|          | TIMM17A  |    |   | 1  |
| III      | TIMM17B  |    |   |    |
| III      | TIMM21   |    |   | 1  |
| II + III | TIMM22   | 5  | 1 | 5  |
| II       | TIMM23   | 1  | 1 | 1  |
| II       | TIMM44   | 1  | 1 | 1  |
| II       | TIMM50   | 1  | 5 | 4  |
| II + III | TIMM8A   | 1  | 1 | 1  |
| III      | TIMM8B   |    |   | 1  |
| III      | TIMM9    |    | 1 | 2  |
| III      | TIMMDC1  | 1  |   |    |
| II       | TIMP1    | 2  | 1 | 1  |
| II       | TIMP2    | 10 | 9 | 15 |
| III      | TIMP4    |    |   | 1  |
| III      | TINAGL1  |    |   |    |
|          | TINF2    |    |   | 3  |
| II + III | TIPARP   | 2  | 2 | 14 |
| II       | TIPIN    | 1  | 1 | 2  |
| III      | TIPRL    |    |   | 2  |
|          | TIRAP    |    | 3 | 4  |
| III      | TJAP1    |    |   | 1  |
| II       | TJP1     | 2  | 3 | 5  |
|          | TJP2     |    | 2 | 3  |
| III      | TK1      |    | 3 | 1  |
|          | TK2      |    |   | 2  |
| II       | TKT      | 6  | 6 | 5  |
| II       | TLCD1    | 2  | 2 | 4  |
|          | TLE1     | 1  | 2 |    |
| III      | TLE2     |    |   |    |
| II       | TLE3     | 1  | 2 | 9  |
|          | TLE4     |    |   | 1  |
| III      | TLK1     |    | 1 | 2  |
| II       | TLK2     | 1  | 2 | 2  |
| II       | TLN1     | 4  | 2 | 3  |
|          | TLN2     |    |   |    |
|          | TLR3     |    | 1 | 4  |
| III      | TLX3     |    |   | 1  |

|          |          |    |    |    |
|----------|----------|----|----|----|
| III      | TM2D1    |    |    | 1  |
| II + III | TM2D2    | 1  | 3  | 3  |
|          | TM2D3    |    |    |    |
| III      | TM4SF1   | 1  |    | 1  |
| II       | TM7SF3   | 2  | 3  | 3  |
| II + III | TM9SF1   | 1  | 4  | 7  |
|          | TM9SF2   |    | 1  | 2  |
| II       | TM9SF3   | 1  | 3  | 4  |
| II       | TM9SF4   | 7  | 11 | 21 |
| III      | TMA16    |    |    | 2  |
| III      | TMBIM1   |    |    | 2  |
| III      | TMBIM4   |    |    |    |
| II       | TMBIM6   | 11 | 11 | 14 |
| III      | TMC6     |    |    | 1  |
| II + III | TMCC1    | 2  | 2  | 9  |
|          | TMCC2    |    | 1  | 4  |
| II       | TMCO1    | 1  | 2  | 2  |
|          | TMCO3    |    | 1  | 4  |
| II       | TMCO4    | 1  | 1  | 3  |
| III      | TMCO6    |    |    |    |
|          | TMCO7    |    |    | 2  |
|          | TMED1    |    | 2  | 2  |
| II       | TMED10   | 1  | 9  | 6  |
| II       | TMED2    | 2  | 5  | 5  |
| III      | TMED3    |    | 2  |    |
| III      | TMED4    |    |    |    |
| II       | TMED5    | 1  | 3  | 5  |
| II + III | TMED8    | 1  | 2  | 2  |
| II       | TMED9    | 4  | 11 | 10 |
| III      | TMEM101  |    | 1  | 1  |
| II       | TMEM104  | 2  | 6  | 18 |
| III      | TMEM106B | 1  |    |    |
| III      | TMEM106C |    | 1  | 1  |
| II + III | TMEM107  | 1  | 1  | 4  |
| II       | TMEM109  | 3  | 8  | 10 |
| II + III | TMEM111  | 2  | 1  | 5  |
| II + III | TMEM115  | 6  | 3  | 12 |
|          | TMEM116  |    |    | 2  |
|          | TMEM117  |    |    |    |
| III      | TMEM120A |    | 1  | 1  |
| III      | TMEM120B |    |    | 3  |
| III      | TMEM123  |    | 4  | 5  |
| III      | TMEM126A |    |    |    |
| III      | TMEM126B |    |    | 1  |
| II + III | TMEM127  | 12 | 17 | 30 |
| III      | TMEM128  |    |    | 1  |
| II       | TMEM129  | 3  | 3  | 4  |
| III      | TMEM131  |    | 1  | 8  |
| II       | TMEM132A | 3  | 6  | 4  |
| III      | TMEM134  |    |    |    |
| III      | TMEM135  |    |    | 2  |



|          |              |   |    |    |
|----------|--------------|---|----|----|
|          | TMEM136      |   |    |    |
| III      | TMEM138      |   | 1  | 2  |
|          | TMEM139      |   |    | 2  |
| III      | TMEM141      |   |    |    |
| III      | TMEM143      |   |    |    |
| III      | TMEM147      |   | 2  | 1  |
| III      | TMEM14A      |   |    |    |
| III      | TMEM14B      | 1 |    |    |
| II       | TMEM14C      | 2 | 2  | 3  |
| III      | TMEM150A     |   |    | 1  |
| III      | TMEM158      |   |    |    |
| III      | TMEM159      |   |    | 2  |
| III      | TMEM160      |   |    |    |
| II       | TMEM161A     | 3 | 3  | 2  |
|          | TMEM161B     |   | 2  | 3  |
| III      | TMEM161B-AS1 | 1 |    | 3  |
| III      | TMEM164      |   |    |    |
| II       | TMEM165      | 1 | 3  | 3  |
| III      | TMEM167A     |   |    | 2  |
| II + III | TMEM167B     | 1 | 1  | 4  |
| II + III | TMEM168      | 2 | 2  | 2  |
| II + III | TMEM170A     | 1 | 1  | 1  |
| II       | TMEM173      | 1 | 1  | 1  |
| II       | TMEM175      | 1 | 1  | 4  |
|          | TMEM177      |   | 1  | 3  |
| III      | TMEM179B     |   |    |    |
| II       | TMEM18       | 3 | 3  | 5  |
|          | TMEM181      |   | 3  | 1  |
| II       | TMEM184A     | 4 | 16 | 30 |
| II       | TMEM184B     | 2 | 9  | 16 |
| II + III | TMEM184C     | 1 | 1  | 3  |
|          | TMEM185A     |   | 2  | 3  |
| II + III | TMEM185B     | 3 | 6  | 14 |
| II + III | TMEM186      | 2 | 3  | 4  |
|          | TMEM187      |   | 1  | 1  |
|          | TMEM19       |   | 1  | 1  |
| II       | TMEM192      | 3 | 1  | 1  |
|          | TMEM194A     |   | 2  | 6  |
|          | TMEM194B     |   |    |    |
|          | TMEM199      |   | 1  |    |
| II + III | TMEM2        | 2 | 2  | 3  |
| II       | TMEM201      | 4 | 7  | 8  |
| II + III | TMEM203      | 5 | 6  | 6  |
| III      | TMEM205      | 1 | 1  |    |
|          | TMEM206      |   | 2  | 4  |
| III      | TMEM208      | 2 | 1  |    |
| II       | TMEM209      | 1 | 5  | 2  |
| II       | TMEM214      | 7 | 11 | 12 |
| III      | TMEM218      |   |    |    |
| III      | TMEM219      |   | 1  |    |
| III      | TMEM222      |   | 3  | 3  |

|          |         |   |    |    |
|----------|---------|---|----|----|
| II + III | TMEM223 | 2 | 4  | 3  |
| III      | TMEM230 |   |    |    |
|          | TMEM231 |   | 1  | 2  |
|          | TMEM234 | 1 |    | 1  |
| III      | TMEM237 | 1 |    | 2  |
| III      | TMEM241 |   |    |    |
| III      | TMEM242 |   |    |    |
| II + III | TMEM245 | 3 | 2  | 7  |
| III      | TMEM25  |   |    |    |
|          | TMEM30A |   | 4  | 3  |
| II       | TMEM33  | 1 | 2  | 5  |
| II + III | TMEM37  | 2 | 1  | 2  |
|          | TMEM38A | 1 |    | 2  |
| II       | TMEM38B | 1 | 1  | 1  |
| II       | TMEM39A | 2 | 2  | 3  |
| II       | TMEM39B | 1 | 1  | 2  |
|          | TMEM41A |   |    | 4  |
| III      | TMEM41B | 1 |    | 1  |
| III      | TMEM42  |   |    | 3  |
| II + III | TMEM43  | 5 | 11 | 16 |
| III      | TMEM45A |   | 2  | 2  |
|          | TMEM47  |   | 2  | 4  |
| II + III | TMEM48  | 2 | 3  | 7  |
|          | TMEM5   |   |    |    |
| III      | TMEM50A |   | 1  | 3  |
| III      | TMEM50B |   |    |    |
| II + III | TMEM51  | 2 | 2  | 5  |
| III      | TMEM54  |   |    |    |
| III      | TMEM55A |   |    |    |
| III      | TMEM55B | 1 |    | 3  |
|          | TMEM57  |   | 4  | 6  |
| III      | TMEM59  | 1 | 1  |    |
| III      | TMEM59L |   |    |    |
|          | TMEM60  |   | 1  | 2  |
| III      | TMEM62  |   |    | 1  |
| III      | TMEM63A |   | 1  | 4  |
| III      | TMEM63B |   | 1  | 3  |
| III      | TMEM64  |   | 1  | 1  |
| III      | TMEM65  |   |    |    |
| II + III | TMEM66  | 3 | 4  | 3  |
|          | TMEM67  |   |    |    |
| III      | TMEM68  |   |    |    |
| III      | TMEM69  |   |    |    |
|          | TMEM70  |   |    | 1  |
| II + III | TMEM79  | 1 | 6  | 9  |
| III      | TMEM80  |   |    | 1  |
| II       | TMEM87A | 1 | 1  | 4  |
|          | TMEM87B |   |    | 1  |
|          | TMEM8A  |   | 7  | 6  |
| III      | TMEM8B  |   |    |    |
| III      | TMEM9   | 1 |    | 2  |

|          |           |    |    |    |
|----------|-----------|----|----|----|
| II + III | TMEM97    | 2  | 5  | 8  |
| III      | TMEM99    |    |    | 1  |
| III      | TMEM9B    |    | 1  | 3  |
|          | TMF1      |    | 2  | 3  |
|          | TMLHE     |    |    |    |
| III      | TMOD3     |    |    |    |
| II       | TMPO      | 1  | 4  | 12 |
| III      | TMPRSS3   |    |    | 1  |
| II       | TMSB10    | 1  | 1  | 1  |
| II       | TMSB4X    | 1  | 1  | 2  |
| II + III | TMTC1     | 1  | 2  | 8  |
|          | TMTC3     |    | 3  | 3  |
|          | TMTC4     |    |    | 1  |
| II       | TMUB1     | 4  | 5  | 6  |
| II       | TMUB2     | 1  | 1  | 3  |
| III      | TMX1      |    |    |    |
|          | TMX3      |    |    | 1  |
| III      | TMX4      |    | 2  | 2  |
| II + III | TNFAIP1   | 5  | 6  | 11 |
| II       | TNFAIP2   | 1  | 2  | 4  |
| II + III | TNFAIP3   | 2  | 1  | 7  |
|          | TNFAIP8   |    | 1  | 1  |
|          | TNFAIP8L1 |    | 2  | 8  |
|          | TNFRSF10A |    |    | 4  |
| II + III | TNFRSF10B | 3  | 9  | 15 |
| II       | TNFRSF10D | 3  | 2  | 4  |
| II       | TNFRSF12A | 3  | 3  | 3  |
|          | TNFRSF19  |    |    | 1  |
| II       | TNFRSF1A  | 8  | 8  | 7  |
| II + III | TNFRSF21  | 1  | 2  | 5  |
| II + III | TNFSF9    | 1  | 3  | 3  |
| III      | TNIP1     |    | 2  |    |
| III      | TNIP2     | 1  |    | 1  |
|          | TNK1      | 1  |    | 2  |
| III      | TNK2      |    |    | 2  |
|          | TNKS      |    | 5  |    |
| II       | TNKS1BP1  | 3  | 11 | 18 |
|          | TNKS2     |    | 2  |    |
| III      | TNNC1     |    |    |    |
| III      | TNNT1     |    |    |    |
| II + III | TNPO1     | 2  | 3  | 5  |
| II       | TNPO2     | 1  | 2  | 3  |
|          | TNPO3     |    | 2  | 5  |
| II + III | TNRC18    | 21 | 13 | 30 |
| II       | TNRC6A    | 4  | 9  | 15 |
| II       | TNRC6B    | 2  | 4  | 4  |
| II       | TNS1      | 2  | 3  | 10 |
| II + III | TNS3      | 2  | 3  | 6  |
|          | TOB1      | 3  |    | 3  |
| II + III | TOB2      | 1  | 8  | 14 |
|          | TOE1      |    |    | 3  |

|          |          |   |    |    |
|----------|----------|---|----|----|
| II       | TOLLIP   | 1 | 1  | 1  |
| III      | TOM1     |   | 1  | 2  |
| III      | TOM1L1   |   | 1  |    |
| II       | TOM1L2   | 2 | 2  | 10 |
| II       | TOMM20   | 3 | 2  | 5  |
| III      | TOMM22   | 1 |    | 1  |
| II       | TOMM34   | 1 | 1  | 3  |
| II       | TOMM40   | 1 | 2  | 7  |
| II + III | TOMM40L  | 3 | 2  | 7  |
| III      | TOMM5    |   |    | 2  |
| II       | TOMM6    | 2 | 1  | 4  |
| III      | TOMM7    |   |    |    |
| II       | TOMM70A  | 3 | 1  | 6  |
| III      | TONSL    | 1 |    | 2  |
| III      | TOP1     |   | 1  | 5  |
| III      | TOP1MT   | 1 |    |    |
|          | TOP2A    | 1 |    | 4  |
| III      | TOP2B    |   | 1  | 1  |
| II       | TOP3A    | 5 | 2  | 6  |
| III      | TOP3B    |   |    |    |
| II + III | TOPBP1   | 1 | 2  | 4  |
|          | TOPORS   |   | 4  | 5  |
|          | TOR1A    |   | 1  | 3  |
| II + III | TOR1AIP1 | 4 | 5  | 14 |
| II + III | TOR1AIP2 | 9 | 10 | 18 |
| II + III | TOR1B    | 2 | 12 | 11 |
| II       | TOR2A    | 1 | 3  | 5  |
| II + III | TOR3A    | 3 | 1  | 4  |
| II       | TOR4A    | 5 | 14 | 24 |
|          | TOX2     |   |    | 1  |
| III      | TOX4     |   | 1  | 1  |
| III      | TP53     |   |    | 4  |
|          | TP53BP1  |   |    | 1  |
|          | TP53BP2  |   | 2  | 5  |
| III      | TP53I13  | 1 |    | 1  |
|          | TP53I3   |   |    |    |
| III      | TP53INP2 | 1 |    | 1  |
| III      | TP53TG1  |   |    |    |
| II + III | TP73-AS1 | 1 | 1  | 8  |
| II + III | TPBG     | 7 | 10 | 15 |
| II       | TPCN1    | 3 | 2  | 5  |
| III      | TPD52    |   |    | 3  |
| II       | TPD52L2  | 4 | 6  | 13 |
| III      | TPGS1    |   |    | 1  |
| III      | TPGS2    |   | 5  | 4  |
| II       | TPI1     | 3 | 7  | 6  |
| III      | TPM1     |   |    |    |
| II       | TPM2     | 1 | 1  | 2  |
| II       | TPM3     | 1 | 1  | 4  |
| III      | TPM4     |   | 6  | 4  |
| III      | TPMT     |   |    |    |

|          |          |   |    |    |
|----------|----------|---|----|----|
| II       | TPP1     | 3 | 6  | 7  |
|          | TPP2     |   |    |    |
| II + III | TPPP     | 4 | 5  | 7  |
| III      | TPR      |   |    | 2  |
| II       | TPRA1    | 2 | 4  | 4  |
| III      | TPRG1L   |   |    |    |
| III      | TPRKB    |   |    |    |
| III      | TPRN     |   | 1  | 5  |
|          | TPST1    | 1 |    | 3  |
|          | TPST2    | 1 |    |    |
| II       | TPT1     | 5 | 5  | 3  |
| III      | TPT1-AS1 |   |    |    |
| II       | TPX2     | 3 | 11 | 11 |
| III      | TRA2A    | 1 |    | 3  |
| II       | TRA2B    | 1 | 1  | 2  |
| III      | TRABD    |   |    | 3  |
| II       | TRADD    | 1 | 1  | 1  |
| II       | TRAF2    | 2 | 1  | 5  |
|          | TRAF3    |   | 2  | 6  |
| III      | TRAF3IP1 |   | 1  |    |
|          | TRAF3IP2 |   | 1  | 5  |
| II + III | TRAF4    | 6 | 2  | 14 |
|          | TRAF5    |   |    | 4  |
| II + III | TRAF6    | 1 | 1  | 2  |
| II       | TRAF7    | 5 | 2  | 7  |
| III      | TRAFD1   | 1 |    | 3  |
|          | TRAIP    |   |    | 1  |
| II + III | TRAK1    | 2 | 3  | 9  |
|          | TRAK2    |   | 1  | 4  |
| III      | TRAM1    |   | 2  | 2  |
| II       | TRAM2    | 2 | 9  | 16 |
| III      | TRAP1    | 1 |    | 2  |
| III      | TRAPPC1  |   |    | 1  |
| II + III | TRAPPC10 | 1 | 4  | 6  |
|          | TRAPPC11 |   | 1  |    |
| II       | TRAPPC12 | 2 | 1  | 10 |
| III      | TRAPPC2  |   |    |    |
| III      | TRAPPC2L |   |    | 1  |
|          | TRAPPC3  |   |    | 1  |
| III      | TRAPPC4  |   |    |    |
| III      | TRAPPC5  |   |    | 1  |
| III      | TRAPPC6A |   |    |    |
| III      | TRAPPC6B |   | 2  | 1  |
| II + III | TRAPPC8  | 1 | 1  | 1  |
|          | TRAPPC9  |   |    |    |
|          | TRDMT1   |   |    |    |
| II       | TRERF1   | 1 | 2  | 9  |
|          | TREX1    |   |    |    |
|          | TRIAP1   |   | 1  |    |
| II + III | TRIB1    | 5 | 5  | 21 |
| II       | TRIB3    | 3 | 8  | 14 |

|          |         |   |   |    |
|----------|---------|---|---|----|
| II       | TRIM11  | 3 | 4 | 7  |
|          | TRIM13  |   | 2 | 2  |
| II       | TRIM14  | 1 | 1 | 4  |
|          | TRIM16  |   | 4 | 7  |
| II       | TRIM16L | 3 | 6 | 12 |
|          | TRIM2   |   | 5 | 2  |
|          | TRIM21  | 1 |   | 2  |
|          | TRIM23  |   |   |    |
|          | TRIM24  |   | 1 | 1  |
| II       | TRIM25  | 7 | 5 | 11 |
| II       | TRIM26  | 1 | 5 | 13 |
| II       | TRIM27  | 1 | 3 | 8  |
| II       | TRIM28  | 5 | 5 | 5  |
| III      | TRIM29  |   |   | 2  |
|          | TRIM3   |   | 1 | 1  |
| II + III | TRIM32  | 2 | 1 | 5  |
|          | TRIM33  |   | 2 | 3  |
| III      | TRIM35  | 1 |   | 1  |
|          | TRIM36  |   |   |    |
|          | TRIM37  |   |   |    |
|          | TRIM38  |   | 1 | 3  |
| II       | TRIM4   | 1 | 4 | 7  |
| II       | TRIM41  | 3 | 1 | 6  |
| III      | TRIM44  |   | 2 | 6  |
|          | TRIM45  |   |   | 3  |
| III      | TRIM47  |   | 3 | 6  |
|          | TRIM5   |   | 1 | 2  |
|          | TRIM52  |   |   | 1  |
| II + III | TRIM56  | 5 | 7 | 12 |
|          | TRIM62  |   | 1 | 4  |
| II       | TRIM65  | 2 | 4 | 11 |
| II       | TRIM7   | 1 | 1 | 2  |
|          | TRIM8   |   |   | 4  |
|          | TRIML2  |   |   |    |
| II + III | TRIO    | 5 | 9 | 10 |
| III      | TRIOBP  |   | 1 | 2  |
| III      | TRIP10  |   | 1 | 3  |
| III      | TRIP11  |   |   | 2  |
| II + III | TRIP12  | 2 | 1 | 6  |
| III      | TRIP13  |   | 2 | 3  |
| III      | TRIP4   |   |   |    |
| II       | TRIP6   | 1 | 1 | 2  |
| III      | TRIT1   |   |   |    |
| III      | TRMT1   | 2 |   | 4  |
| III      | TRMT11  |   |   |    |
| III      | TRMT112 |   |   |    |
| III      | TRMT12  |   |   |    |
| III      | TRMT1L  |   |   |    |
|          | TRMT2A  |   |   | 2  |
| III      | TRMT2B  |   |   |    |
|          | TRMT5   |   |   | 1  |

|          |          |    |    |    |
|----------|----------|----|----|----|
| III      | TRMT6    |    |    | 1  |
| III      | TRMT61A  |    |    | 3  |
|          | TRMT61B  |    |    | 2  |
| III      | TRMU     |    |    | 1  |
| III      | TRNAU1AP |    |    |    |
| III      | TRNP1    |    |    |    |
|          | TRNT1    |    |    | 1  |
| III      | TROAP    |    | 2  | 6  |
|          | TROVE2   |    |    | 4  |
|          | TRPC1    |    |    | 1  |
| III      | TRPC4AP  |    | 2  | 4  |
|          | TRPM7    |    |    |    |
| II + III | TRPS1    | 3  | 7  | 13 |
| III      | TRPT1    |    |    |    |
| II + III | TRRAP    | 4  | 2  | 6  |
| III      | TRUB1    |    |    |    |
| II + III | TRUB2    | 1  | 1  | 3  |
|          | TSC1     | 1  |    | 7  |
| III      | TSC2     |    |    |    |
| II + III | TSC22D1  | 10 | 13 | 29 |
| II + III | TSC22D2  | 1  | 3  | 15 |
|          | TSC22D3  | 1  |    | 1  |
| II       | TSC22D4  | 3  | 6  | 14 |
| III      | TSEN15   |    |    | 1  |
| III      | TSEN2    |    |    | 1  |
| III      | TSEN34   |    |    | 1  |
| II       | TSEN54   | 1  | 1  | 2  |
| II + III | TSFM     | 2  | 2  | 2  |
| III      | TSG101   |    | 2  | 2  |
| II + III | TSHZ1    | 3  | 3  | 12 |
| II + III | TSHZ2    | 1  | 2  | 5  |
| III      | TSN      |    |    | 2  |
| III      | TSPAN12  |    |    |    |
| III      | TSPAN13  |    |    |    |
| II       | TSPAN14  | 2  | 2  | 6  |
| III      | TSPAN15  |    | 1  | 1  |
| II + III | TSPAN17  | 2  | 2  | 3  |
| II       | TSPAN3   | 7  | 8  | 7  |
| III      | TSPAN31  |    |    |    |
| III      | TSPAN33  |    |    |    |
| II       | TSPAN4   | 1  | 1  | 1  |
|          | TSPAN5   |    | 1  | 2  |
| III      | TSPAN7   |    |    |    |
| III      | TSPAN9   |    | 2  | 2  |
| III      | TSPO     | 1  |    | 3  |
| II + III | TSPYL1   | 1  | 1  | 9  |
| III      | TSPYL2   |    |    | 3  |
| II + III | TSPYL4   | 1  | 3  | 4  |
| II       | TSR1     | 2  | 2  | 3  |
| II       | TSR2     | 1  | 2  | 6  |
| II       | TSSC1    | 2  | 1  | 2  |

|          |           |    |    |    |
|----------|-----------|----|----|----|
|          | TSSC4     | 3  |    | 4  |
| III      | TST       |    |    |    |
| III      | TSTA3     |    | 1  | 1  |
|          | TSTD2     |    |    | 3  |
|          | TTBK2     |    | 3  | 7  |
| III      | TTC1      |    |    | 1  |
| III      | TTC12     |    |    |    |
| III      | TTC13     |    |    |    |
| III      | TTC14     |    |    |    |
| III      | TTC17     | 1  | 2  |    |
| III      | TTC19     |    |    | 1  |
|          | TTC21B    |    |    |    |
|          | TTC23     |    |    |    |
|          | TTC26     |    |    |    |
|          | TTC27     | 1  |    |    |
| II + III | TTC28     | 1  | 1  | 10 |
|          | TTC28-AS1 |    | 1  | 1  |
|          | TTC3      | 1  |    | 2  |
| III      | TTC31     |    |    |    |
| III      | TTC32     |    |    |    |
|          | TTC33     |    |    | 1  |
|          | TTC37     |    | 1  | 1  |
| III      | TTC38     | 1  |    |    |
|          | TTC39C    |    |    |    |
| III      | TTC5      |    |    |    |
| III      | TTC7A     |    |    | 4  |
| III      | TTC7B     |    |    |    |
| III      | TTC8      |    |    | 1  |
|          | TTC9      |    | 4  | 7  |
| III      | TTC9C     |    |    | 1  |
| III      | TTF1      |    |    |    |
|          | TTF2      |    |    | 3  |
| II + III | TTI1      | 2  | 3  | 12 |
|          | TTI2      | 1  |    |    |
| III      | TTK       |    |    |    |
| II       | TTLL12    | 1  | 3  | 4  |
|          | TTLL4     |    | 2  | 5  |
| III      | TTLL5     |    |    | 2  |
|          | TTLL7     |    |    |    |
| II + III | TTPAL     | 3  | 4  | 11 |
| II       | TTYH3     | 12 | 12 | 23 |
| II       | TUBA1A    | 2  | 5  | 8  |
| II       | TUBA1B    | 5  | 9  | 11 |
| II       | TUBA1C    | 8  | 4  | 9  |
| II       | TUBA4A    | 1  | 1  | 3  |
| II       | TUBB      | 12 | 9  | 11 |
|          | TUBB2A    |    | 1  | 3  |
| III      | TUBB3     |    | 2  | 1  |
| II       | TUBB4B    | 1  | 4  | 7  |
| II + III | TUBB6     | 3  | 4  | 8  |
|          | TUBD1     |    |    |    |



|          |         |   |    |    |
|----------|---------|---|----|----|
| III      | TUBE1   |   |    |    |
| II       | TUBG1   | 1 | 3  | 6  |
| III      | TUBG2   |   |    | 2  |
| III      | TUBGCP2 |   |    | 1  |
|          | TUBGCP3 |   | 1  | 2  |
| II       | TUBGCP4 | 1 | 2  | 2  |
|          | TUBGCP5 |   |    | 1  |
|          | TUBGCP6 |   | 1  |    |
| II       | TUFM    | 3 | 1  | 4  |
| II       | TUFT1   | 1 | 3  | 12 |
| II + III | TUG1    | 9 | 15 | 36 |
| II       | TULP3   | 2 | 4  | 10 |
| II + III | TULP4   | 2 | 7  | 18 |
|          | TUSC1   |   | 1  | 2  |
| III      | TUSC2   |   |    |    |
| III      | TUSC3   |   | 1  | 1  |
| II       | TUT1    | 1 | 2  | 5  |
| II       | TWF1    | 2 | 3  | 1  |
| III      | TWF2    |   |    | 1  |
|          | TWISTNB |   | 2  | 2  |
|          | TWSG1   | 1 |    |    |
| III      | TXLNA   |   | 4  | 9  |
| III      | TXLNG   | 1 |    | 1  |
| III      | TXN     | 1 |    |    |
| II       | TXN2    | 2 | 2  | 3  |
| II + III | TXNDC11 | 1 | 2  | 10 |
| III      | TXNDC12 |   | 1  | 3  |
| II       | TXNDC15 | 1 | 1  | 4  |
|          | TXNDC16 |   |    |    |
| III      | TXNDC17 |   |    |    |
| III      | TXNDC9  |   |    |    |
| II       | TXNIP   | 1 | 3  | 8  |
| III      | TXNL1   |   | 1  | 2  |
| II       | TXNL4A  | 1 | 1  | 1  |
|          | TXNL4B  |   |    | 1  |
| II       | TXNRD1  | 8 | 14 | 19 |
| II       | TXNRD2  | 1 | 4  | 5  |
| III      | TYK2    |   |    |    |
| III      | TYMP    |   |    |    |
| III      | TYMS    | 2 | 1  |    |
| III      | TYRO3   |   | 1  | 2  |
| II       | TYSND1  | 2 | 5  | 7  |
|          | TYW1    |   |    | 1  |
| III      | TYW3    |   |    |    |
|          | TYW5    |   |    |    |
| II       | U2AF1   | 2 | 1  | 3  |
| III      | U2AF1L4 |   |    |    |
| II       | U2AF2   | 6 | 7  | 16 |
| III      | U2SURP  |   | 1  | 3  |
| III      | UACA    |   |    |    |
|          | UAP1    |   |    | 2  |

|          |           |   |   |    |
|----------|-----------|---|---|----|
| II       | UAP1L1    | 2 | 3 | 13 |
| II       | UBA1      | 7 | 3 | 6  |
| III      | UBA2      | 1 |   | 2  |
| III      | UBA3      |   | 1 | 1  |
| III      | UBA5      |   |   |    |
| II       | UBA52     | 2 | 4 | 4  |
| II + III | UBA6      | 2 | 2 | 1  |
| III      | UBAC1     | 1 |   |    |
| II       | UBAC2     | 2 | 1 | 2  |
|          | UBAC2-AS1 |   |   |    |
| II + III | UBAP1     | 4 | 5 | 13 |
| III      | UBAP2     |   | 1 | 5  |
| II       | UBAP2L    | 5 | 9 | 10 |
|          | UBASH3B   |   |   | 1  |
| III      | UBB       |   | 2 | 5  |
| II       | UBC       | 4 | 4 | 10 |
| III      | UBE2A     |   |   | 2  |
| III      | UBE2B     |   | 2 | 3  |
| III      | UBE2C     | 2 |   |    |
| III      | UBE2D1    |   |   | 2  |
| II       | UBE2D2    | 1 | 2 | 5  |
| II       | UBE2D3    | 1 | 1 | 4  |
| III      | UBE2E1    |   | 2 | 1  |
| III      | UBE2E2    |   | 1 |    |
| III      | UBE2E3    |   | 1 | 2  |
| II       | UBE2G1    | 3 | 4 | 3  |
|          | UBE2G2    |   |   | 2  |
|          | UBE2H     |   |   | 5  |
| III      | UBE2I     | 2 |   | 2  |
| II       | UBE2J1    | 2 | 2 | 3  |
| II       | UBE2J2    | 4 | 1 | 4  |
| III      | UBE2K     | 1 |   | 3  |
| II       | UBE2L3    | 3 | 3 | 6  |
| III      | UBE2M     |   | 2 | 4  |
| III      | UBE2N     |   | 1 | 1  |
|          | UBE2O     |   | 5 | 17 |
| II + III | UBE2Q1    | 2 | 6 | 11 |
| III      | UBE2Q2    |   |   |    |
|          | UBE2R2    |   | 7 | 11 |
| II       | UBE2S     | 2 | 1 | 7  |
| III      | UBE2T     |   | 1 | 1  |
| II       | UBE2V1    | 2 | 6 | 7  |
| III      | UBE2V2    |   |   | 1  |
| III      | UBE2W     |   |   |    |
| II       | UBE2Z     | 2 | 2 | 10 |
|          | UBE3A     |   | 4 | 3  |
| II + III | UBE3B     | 1 | 1 | 4  |
|          | UBE3C     |   | 4 | 8  |
| III      | UBE3D     |   |   |    |
| II + III | UBE4A     | 1 | 6 | 4  |
|          | UBE4B     |   |   | 6  |

|          |          |   |   |    |
|----------|----------|---|---|----|
| III      | UBFD1    |   | 1 | 1  |
| II + III | UBIAD1   | 2 | 5 | 6  |
|          | UBL3     |   | 1 | 2  |
| II + III | UBL4A    | 4 | 7 | 16 |
| III      | UBL5     |   |   | 2  |
| III      | UBL7     |   | 2 | 2  |
| III      | UBLCP1   |   |   | 1  |
| II       | UBN1     | 1 | 3 | 13 |
| II       | UBN2     | 1 | 3 | 13 |
|          | UBOX5    |   |   |    |
| II       | UBP1     | 2 | 7 | 7  |
| II       | UBQLN1   | 1 | 4 | 2  |
| II + III | UBQLN2   | 3 | 5 | 5  |
| II       | UBQLN4   | 2 | 3 | 5  |
|          | UBR1     |   |   | 1  |
|          | UBR2     |   |   | 2  |
|          | UBR3     |   |   | 4  |
|          | UBR4     |   | 3 | 3  |
|          | UBR5     |   | 2 | 3  |
| III      | UBR7     |   |   | 2  |
|          | UBTD1    |   |   | 1  |
| II + III | UBTD2    | 2 | 3 | 7  |
| II       | UBTF     | 2 | 6 | 15 |
| II       | UBXN1    | 2 | 1 | 1  |
| III      | UBXN11   |   |   |    |
|          | UBXN2A   |   | 1 | 2  |
| III      | UBXN2B   | 1 |   | 1  |
| III      | UBXN4    |   | 1 | 3  |
| III      | UBXN6    |   | 3 | 1  |
|          | UBXN7    |   | 1 | 1  |
| III      | UBXN8    |   | 1 | 2  |
| III      | UCHL3    |   |   |    |
| II       | UCHL5    | 1 | 1 | 1  |
|          | UCK1     |   |   | 1  |
| II       | UCK2     | 1 | 1 | 7  |
| III      | UCKL1    |   |   | 1  |
| III      | UCP2     |   | 1 | 1  |
|          | UEVLD    |   |   |    |
| III      | UFC1     |   |   | 2  |
| III      | UFD1L    |   |   | 1  |
| III      | UFL1     | 1 | 3 |    |
| III      | UFM1     |   |   | 1  |
| III      | UFSP2    |   |   |    |
| II       | UGCG     | 1 | 1 | 1  |
| III      | UGDH     |   |   |    |
|          | UGGT1    | 1 |   | 1  |
|          | UGGT2    |   |   | 2  |
| III      | UGP2     |   |   |    |
| II + III | UHMK1    | 2 | 3 | 10 |
|          | UHRF1    |   |   | 2  |
| II + III | UHRF1BP1 | 2 | 4 | 13 |

|          |           |   |   |    |
|----------|-----------|---|---|----|
|          | UHRF1BP1L |   | 1 | 2  |
|          | UHRF2     |   |   | 1  |
| III      | UIMC1     |   | 1 | 1  |
|          | ULBP3     |   |   | 1  |
| II       | ULK1      | 3 | 1 | 11 |
| III      | ULK3      |   |   | 1  |
|          | ULK4      | 1 |   |    |
| II + III | UMPS      | 1 | 1 | 2  |
| III      | UNC119    |   |   | 3  |
| II       | UNC119B   | 1 | 5 | 3  |
| II + III | UNC13B    | 2 | 1 | 5  |
| III      | UNC13D    |   | 2 |    |
| III      | UNC45A    |   |   |    |
| III      | UNC50     |   |   |    |
| III      | UNC93B1   |   | 1 | 1  |
| III      | UNG       | 1 |   | 2  |
| III      | UNK       |   |   | 2  |
|          | UNKL      | 2 |   | 6  |
| II       | UPF1      | 9 | 5 | 16 |
| II       | UPF2      | 2 | 3 | 3  |
| III      | UPF3A     |   |   | 2  |
| III      | UPF3B     |   |   |    |
| III      | UPP1      |   | 1 | 1  |
| III      | UPRT      |   |   |    |
|          | UQCC      |   | 1 | 6  |
| II       | UQCR10    | 2 | 2 | 2  |
| II       | UQCR11    | 1 | 1 | 2  |
| III      | UQCRB     |   | 1 | 2  |
| III      | UQCRC1    |   |   | 1  |
| II       | UQCRC2    | 1 | 1 | 2  |
|          | UQCRFS1   |   |   | 1  |
| III      | UQCRH     |   |   | 1  |
| III      | UQCRQ     |   |   | 3  |
| II + III | URB1      | 2 | 3 | 7  |
| II + III | URB2      | 3 | 7 | 16 |
| II + III | URGCP     | 7 | 5 | 14 |
| III      | URI1      |   |   |    |
| III      | URM1      |   |   | 3  |
| III      | UROD      |   |   |    |
| III      | UROS      |   |   |    |
| III      | USE1      | 1 |   |    |
| II + III | USF1      | 2 | 4 | 5  |
| II       | USF2      | 1 | 2 | 4  |
| III      | USH1C     | 1 |   |    |
| III      | USMG5     |   |   |    |
| III      | USO1      |   | 1 | 1  |
|          | USP1      |   | 1 | 5  |
| II + III | USP10     | 5 | 8 | 14 |
| III      | USP11     |   | 1 | 2  |
|          | USP13     |   |   |    |
| III      | USP14     | 1 |   |    |

|          |        |   |    |    |
|----------|--------|---|----|----|
|          | USP15  |   | 1  |    |
| III      | USP16  |   |    |    |
| III      | USP18  |   |    |    |
| III      | USP19  |   | 1  | 3  |
|          | USP20  |   |    | 3  |
| III      | USP21  |   |    | 1  |
| II       | USP22  | 3 | 11 | 20 |
|          | USP24  |   | 1  |    |
| II + III | USP25  | 1 | 3  | 3  |
|          | USP28  |   |    | 1  |
| II       | USP3   | 1 | 4  | 6  |
| II + III | USP30  | 2 | 2  | 3  |
| II + III | USP31  | 5 | 5  | 17 |
|          | USP32  | 1 |    | 2  |
|          | USP33  |   |    | 1  |
|          | USP34  |   | 3  | 3  |
|          | USP35  |   |    | 2  |
| II       | USP36  | 2 | 3  | 14 |
| II + III | USP37  | 1 | 2  | 3  |
| II + III | USP38  | 1 | 3  | 8  |
| III      | USP39  |   |    | 1  |
|          | USP4   |   | 2  | 2  |
|          | USP40  |   | 1  | 4  |
|          | USP42  |   |    | 9  |
|          | USP43  |   | 1  |    |
|          | USP45  |   |    |    |
|          | USP46  |   | 2  | 3  |
| II + III | USP47  | 1 | 2  | 4  |
| III      | USP48  |   |    |    |
| II       | USP5   | 1 | 1  | 5  |
| II + III | USP53  | 1 | 3  | 1  |
|          | USP54  |   |    | 3  |
| II + III | USP6NL | 2 | 2  | 6  |
| II       | USP7   | 2 | 3  | 4  |
| III      | USP8   |   | 1  | 1  |
| II + III | USP9X  | 2 | 2  | 10 |
|          | USPL1  |   | 2  | 5  |
|          | UST    |   | 1  | 2  |
| III      | UTP11L |   | 1  | 1  |
| III      | UTP14A |   |    | 4  |
|          | UTP15  |   |    |    |
| III      | UTP18  |   |    | 1  |
|          | UTP20  | 1 |    |    |
| III      | UTP23  |   |    | 2  |
|          | UTP3   |   | 1  | 3  |
| III      | UTP6   |   |    |    |
|          | UVRAG  |   | 1  | 2  |
|          | UXS1   |   |    |    |
| III      | UXT    |   | 1  |    |
| II       | VAC14  | 2 | 2  | 6  |
| III      | VAMP1  |   |    |    |
| III      | VAMP2  |   | 1  | 3  |

|          |          |   |    |    |
|----------|----------|---|----|----|
| II       | VAMP3    | 1 | 2  | 6  |
| III      | VAMP4    |   |    |    |
|          | VAMP7    |   |    | 1  |
| III      | VAMP8    |   |    |    |
| II + III | VANGL1   | 3 | 8  | 16 |
| III      | VAPA     |   | 2  | 2  |
| III      | VAPB     |   | 3  | 6  |
| II       | VARS     | 3 | 3  | 5  |
|          | VASH2    |   |    |    |
| II + III | VASN     | 5 | 6  | 10 |
| III      | VASP     |   |    | 2  |
| II       | VAT1     | 3 | 4  | 4  |
| III      | VAV2     |   |    | 2  |
| III      | VAV3     |   |    |    |
| III      | VBP1     |   |    | 1  |
| II       | VCL      | 1 | 4  | 7  |
| II       | VCP      | 3 | 3  | 6  |
| II + III | VCPIP1   | 3 | 3  | 9  |
| II       | VDAC1    | 1 | 1  | 1  |
| III      | VDAC2    |   | 1  | 1  |
| III      | VDAC3    |   |    | 2  |
| II + III | VDR      | 2 | 2  | 5  |
| II + III | VEGFA    | 5 | 11 | 13 |
| III      | VEGFB    |   | 4  | 5  |
|          | VEZF1    |   |    | 9  |
| II + III | VEZT     | 1 | 2  | 3  |
|          | VGLL4    |   | 1  | 4  |
| III      | VHL      | 3 |    | 5  |
| II       | VIM      | 4 | 6  | 8  |
|          | VIT      |   |    |    |
| II       | VKORC1   | 3 | 3  | 4  |
|          | VKORC1L1 |   | 2  | 3  |
|          | VLDR     |   | 1  | 2  |
| III      | VMA21    |   | 1  | 1  |
| II       | VMP1     | 2 | 2  | 1  |
| II + III | VOPP1    | 3 | 3  | 7  |
| II + III | VPRBP    | 2 | 7  | 11 |
| III      | VPS11    |   |    | 4  |
|          | VPS13A   | 1 |    | 2  |
|          | VPS13B   |   | 1  | 3  |
|          | VPS13C   |   |    | 1  |
|          | VPS13D   |   |    | 1  |
| II + III | VPS18    | 7 | 7  | 14 |
| II       | VPS25    | 1 | 4  | 3  |
| III      | VPS26A   |   | 1  | 1  |
| III      | VPS26B   |   | 4  | 6  |
| III      | VPS28    | 1 | 1  |    |
| III      | VPS29    |   |    | 3  |
|          | VPS33A   |   | 2  | 3  |
| III      | VPS33B   |   |    |    |
| II       | VPS35    | 1 | 1  | 3  |

|          |         |   |   |    |
|----------|---------|---|---|----|
| III      | VPS36   |   | 1 | 1  |
| III      | VPS37A  |   |   | 2  |
|          | VPS37B  |   | 4 | 9  |
| III      | VPS37C  |   | 2 | 2  |
| II + III | VPS39   | 2 | 5 | 10 |
|          | VPS41   |   |   | 1  |
|          | VPS45   |   |   |    |
| II       | VPS4A   | 3 | 2 | 3  |
| III      | VPS4B   |   |   | 1  |
| III      | VPS52   |   |   | 1  |
|          | VPS53   |   | 2 | 12 |
|          | VPS54   |   | 1 | 1  |
| III      | VPS72   |   |   | 1  |
|          | VPS8    | 1 |   | 1  |
|          | VRK1    |   |   | 1  |
| III      | VRK2    |   | 1 | 1  |
| III      | VRK3    |   |   | 1  |
|          | VSIG10  |   | 2 | 6  |
| III      | VTA1    |   |   | 1  |
|          | VTI1A   | 1 |   | 3  |
| III      | VTI1B   |   |   | 1  |
| III      | VWA5A   |   |   | 1  |
| II       | WAC     | 2 | 1 | 6  |
|          | WAPAL   |   |   | 2  |
| II       | WARS    | 1 | 2 | 3  |
|          | WARS2   |   |   | 1  |
| III      | WASF1   |   | 1 | 3  |
| III      | WASF2   |   | 9 | 14 |
|          | WASF3   |   |   | 2  |
| II       | WASL    | 2 | 4 | 5  |
| II       | WBP11   | 3 | 3 | 6  |
| II       | WBP2    | 1 | 2 | 6  |
| III      | WBP4    |   |   |    |
| III      | WBP5    |   | 1 |    |
| III      | WBSCR16 |   | 1 | 4  |
| III      | WBSCR22 |   |   |    |
|          | WDFY1   |   | 2 | 2  |
|          | WDFY2   |   |   |    |
|          | WDFY3   |   | 1 | 2  |
| II       | WDHD1   | 1 | 1 | 1  |
| II       | WDR1    | 1 | 3 | 3  |
|          | WDR11   |   |   | 3  |
| III      | WDR12   |   |   |    |
| II       | WDR13   | 1 | 2 | 2  |
| III      | WDR18   |   | 1 | 2  |
|          | WDR19   |   |   |    |
|          | WDR20   |   | 2 | 2  |
|          | WDR24   |   | 2 | 5  |
| II       | WDR25   | 1 | 2 | 3  |
| II + III | WDR26   | 1 | 1 | 9  |
| II + III | WDR27   | 1 | 3 | 9  |

|          |         |    |    |    |
|----------|---------|----|----|----|
|          | WDR3    |    |    |    |
| II + III | WDR33   | 3  | 7  | 10 |
| III      | WDR34   | 5  | 1  |    |
|          | WDR35   |    |    |    |
|          | WDR36   |    | 2  | 3  |
|          | WDR37   |    |    |    |
| III      | WDR4    |    |    | 2  |
|          | WDR41   |    |    | 1  |
| II       | WDR43   | 4  | 7  | 4  |
|          | WDR44   |    |    |    |
| III      | WDR45   |    |    |    |
| II       | WDR45L  | 7  | 8  | 12 |
| II       | WDR46   | 2  | 1  | 4  |
| II + III | WDR47   | 1  | 1  | 4  |
|          | WDR48   | 1  |    | 1  |
| III      | WDR5    |    | 2  | 5  |
|          | WDR53   |    |    | 1  |
| III      | WDR54   |    |    |    |
| II       | WDR55   | 2  | 1  | 3  |
|          | WDR59   |    |    |    |
|          | WDR5B   |    | 3  | 4  |
| II + III | WDR6    | 13 | 11 | 24 |
| III      | WDR60   |    |    |    |
| III      | WDR61   |    |    |    |
| III      | WDR62   |    |    |    |
|          | WDR67   |    |    |    |
|          | WDR7    |    |    | 1  |
| III      | WDR70   |    | 1  | 2  |
|          | WDR73   | 2  |    | 2  |
| III      | WDR74   | 1  |    | 2  |
| III      | WDR75   |    |    |    |
| III      | WDR76   | 1  |    |    |
| II       | WDR77   | 3  | 1  | 2  |
| II + III | WDR81   | 8  | 5  | 22 |
| II + III | WDR82   | 3  | 6  | 8  |
| III      | WDR83   |    |    |    |
| III      | WDR83OS |    |    |    |
|          | WDR85   | 1  |    | 1  |
|          | WDR89   |    | 3  | 4  |
| III      | WDR90   |    |    |    |
|          | WDR91   |    |    | 1  |
|          | WDR92   |    |    | 2  |
|          | WDSUB1  |    |    | 1  |
| III      | WDTC1   |    |    | 3  |
|          | WDYHV1  |    |    |    |
|          | WEE1    | 1  |    | 4  |
| III      | WFDC1   |    |    | 1  |
| II       | WFS1    | 1  | 8  | 5  |
| II       | WHAMM   | 1  | 2  | 2  |
| II + III | WHSC1   | 3  | 6  | 18 |
| II + III | WHSC1L1 | 1  | 3  | 10 |



|          |         |    |    |    |
|----------|---------|----|----|----|
| III      | WHSC2   |    |    | 1  |
| II       | WIBG    | 1  | 3  | 2  |
| III      | WIPF1   |    | 3  | 2  |
| II       | WIPF2   | 2  | 5  | 12 |
| III      | WIP11   |    |    |    |
| II       | WIP12   | 2  | 4  | 10 |
| III      | WISP2   | 1  |    | 2  |
| II       | WIZ     | 1  | 3  | 10 |
| II       | WLS     | 2  | 2  | 4  |
| II       | WNK1    | 10 | 13 | 26 |
| III      | WNT10B  |    | 1  | 2  |
| II + III | WNT3    | 2  | 1  | 6  |
| II + III | WNT5A   | 5  | 5  | 10 |
| II + III | WNT7B   | 4  | 10 | 13 |
|          | WNT9A   |    |    |    |
| III      | WRAP53  |    |    |    |
| III      | WRAP73  |    |    | 2  |
| III      | WRB     |    |    |    |
|          | WRN     |    |    |    |
| III      | WRNIP1  |    | 1  |    |
|          | WSB1    |    | 1  | 2  |
| II       | WSB2    | 2  | 2  | 5  |
| II + III | WSCD1   | 1  | 2  | 7  |
| II + III | WTAP    | 1  | 3  | 1  |
| III      | WTIP    |    |    |    |
| III      | WWC1    |    |    | 1  |
|          | WWC2    |    | 1  | 1  |
|          | WWC3    |    | 1  | 3  |
| III      | WWOX    |    |    |    |
|          | WWP1    |    |    | 1  |
| III      | WWP2    |    | 2  | 4  |
|          | WWTR1   |    |    | 3  |
| III      | XAB2    | 1  | 1  |    |
| II       | XBP1    | 5  | 8  | 9  |
|          | XIAP    |    | 1  | 1  |
| II + III | XK      | 1  | 2  | 4  |
| III      | XPA     |    |    |    |
|          | XPC     |    | 1  | 2  |
| III      | XPNPEP1 |    |    |    |
|          | XPNPEP3 |    |    | 4  |
| II       | XPO1    | 2  | 5  | 7  |
| II + III | XPO4    | 1  | 1  | 2  |
| II       | XPO5    | 3  | 3  | 4  |
| II       | XPO6    | 4  | 6  | 12 |
| II       | XPO7    | 1  | 2  | 8  |
| II       | XPOT    | 2  | 2  | 2  |
| II + III | XPR1    | 1  | 1  | 2  |
| II       | XRCC1   | 2  | 1  | 1  |
|          | XRCC2   |    |    | 1  |
| II       | XRCC3   | 1  | 1  | 8  |
| III      | XRCC4   |    |    |    |

|                      |          |    |    |    |
|----------------------|----------|----|----|----|
| III                  | XRCC5    |    |    | 7  |
| II                   | XRCC6    | 2  | 1  | 2  |
| III                  | XRCC6BP1 |    |    |    |
|                      | XRN1     |    |    | 2  |
|                      | XRN2     |    |    | 1  |
|                      | XRRA1    |    |    | 2  |
| II + III             | XXYLT1   | 3  | 2  | 2  |
| III                  | XYLB     |    |    |    |
| II + III             | XYLT1    | 6  | 4  | 19 |
|                      | XYLT2    |    | 1  | 3  |
| III                  | YAE1D1   |    | 1  |    |
| III                  | YAF2     |    |    |    |
| II + III             | YAP1     | 1  | 4  | 6  |
| II                   | YARS     | 3  | 7  | 9  |
| II                   | YARS2    | 1  | 4  | 5  |
| III                  | YBEY     |    |    |    |
| III                  | YBX1     |    | 1  | 2  |
| II                   | YDJC     | 1  | 4  | 3  |
|                      | YEATS2   |    | 2  | 2  |
| III                  | YEATS4   |    |    |    |
| III                  | YES1     |    |    | 2  |
| III                  | YIF1A    |    | 1  | 2  |
| III                  | YIF1B    | 2  |    | 2  |
|                      | YIPF1    |    |    |    |
| III                  | YIPF2    |    |    | 3  |
| II                   | YIPF3    | 2  | 4  | 5  |
| II                   | YIPF4    | 1  | 1  | 1  |
|                      | YIPF5    |    | 2  | 5  |
| III                  | YIPF6    |    | 2  | 1  |
| III                  | YKT6     |    | 3  | 5  |
|                      | YME1L1   |    | 1  | 4  |
| II                   | YPEL5    | 1  | 1  | 2  |
| III                  | YRDC     |    |    | 1  |
| III                  | YTHDC1   |    | 2  | 3  |
|                      | YTHDC2   |    |    | 2  |
| II + III             | YTHDF1   | 15 | 17 | 20 |
| II + III, as the ger | YTHDF2   | 25 | 31 | 30 |
| II + III             | YTHDF3   | 4  | 12 | 21 |
| II                   | YWHAB    | 3  | 4  | 8  |
| III                  | YWHAE    |    | 3  | 6  |
| II                   | YWHAG    | 4  | 8  | 20 |
|                      | YWHAH    | 1  |    | 7  |
| II                   | YWHAQ    | 1  | 3  | 6  |
| II                   | YWHAZ    | 2  | 7  | 7  |
| II                   | YY1      | 1  | 5  | 6  |
| II                   | YY1AP1   | 3  | 3  | 12 |
| II + III             | ZADH2    | 1  | 5  | 10 |
|                      | ZAK      |    |    | 1  |
|                      | ZBED3    |    | 2  | 3  |
| II + III             | ZBED4    | 5  | 1  | 10 |
| II + III             | ZBED5    | 2  | 4  | 4  |

|          |          |   |    |    |
|----------|----------|---|----|----|
|          | ZBED6    |   | 2  | 10 |
|          | ZBTB1    |   |    | 5  |
| II + III | ZBTB10   | 2 | 4  | 11 |
| II + III | ZBTB11   | 1 | 1  | 5  |
| II       | ZBTB17   | 1 | 1  | 1  |
| II + III | ZBTB2    | 4 | 5  | 14 |
| II + III | ZBTB24   | 2 | 2  | 5  |
|          | ZBTB25   |   | 2  | 3  |
|          | ZBTB26   |   | 1  | 4  |
|          | ZBTB3    |   | 2  | 4  |
|          | ZBTB33   |   |    | 4  |
|          | ZBTB34   |   | 1  | 4  |
| II + III | ZBTB37   | 1 | 1  | 2  |
| II + III | ZBTB38   | 1 | 9  | 14 |
| II + III | ZBTB39   | 2 | 7  | 12 |
| II       | ZBTB4    | 3 | 8  | 26 |
| II       | ZBTB40   | 1 | 8  | 16 |
|          | ZBTB41   |   | 2  | 4  |
|          | ZBTB43   |   |    | 5  |
| II + III | ZBTB44   | 3 | 2  | 6  |
|          | ZBTB45   |   | 2  | 9  |
|          | ZBTB46   |   | 1  | 4  |
|          | ZBTB47   |   | 1  |    |
| III      | ZBTB48   |   | 1  | 1  |
|          | ZBTB49   |   | 2  | 3  |
| II + III | ZBTB5    | 1 | 1  | 2  |
| II + III | ZBTB6    | 3 | 4  | 7  |
| II       | ZBTB7A   | 2 | 2  | 7  |
| II + III | ZBTB7B   | 7 | 11 | 20 |
|          | ZBTB8A   |   |    | 2  |
| III      | ZBTB8OS  |   |    |    |
|          | ZBTB9    |   |    | 7  |
| III      | ZC2HC1A  |   |    |    |
|          | ZC3H10   |   |    | 1  |
| II       | ZC3H11A  | 2 | 2  | 9  |
|          | ZC3H12A  |   |    |    |
| III      | ZC3H13   |   | 4  | 5  |
| III      | ZC3H14   |   | 2  | 2  |
| II       | ZC3H15   | 1 | 1  | 1  |
| II       | ZC3H18   | 2 | 1  | 9  |
| III      | ZC3H3    |   |    | 4  |
| II + III | ZC3H4    | 5 | 9  | 19 |
| III      | ZC3H7A   |   |    |    |
| III      | ZC3H7B   |   | 2  | 4  |
| III      | ZC3H8    |   |    |    |
| II + III | ZC3HAV1  | 1 | 1  | 8  |
|          | ZC3HAV1L |   | 1  | 1  |
| III      | ZC3HC1   |   | 1  | 1  |
| III      | ZC4H2    |   |    | 1  |
| III      | ZCCHC10  |   |    |    |
| II       | ZCCHC11  | 1 | 1  | 2  |

|          |          |   |    |    |
|----------|----------|---|----|----|
| II + III | ZCCHC14  | 9 | 9  | 24 |
| III      | ZCCHC17  |   |    | 1  |
| II + III | ZCCHC2   | 3 | 5  | 12 |
|          | ZCCHC24  |   |    | 1  |
| II + III | ZCCHC3   | 1 | 1  | 2  |
| III      | ZCCHC4   |   | 1  |    |
|          | ZCCHC6   |   |    | 2  |
|          | ZCCHC7   |   |    | 3  |
| II + III | ZCCHC8   | 1 | 1  | 6  |
| III      | ZCCHC9   |   |    |    |
| III      | ZCRB1    |   |    |    |
|          | ZDBF2    | 1 |    |    |
| III      | ZDHHC12  |   |    |    |
| III      | ZDHHC13  |   |    |    |
|          | ZDHHC14  |   | 2  | 1  |
| III      | ZDHHC16  |   | 1  | 1  |
|          | ZDHHC17  |   | 2  |    |
| II       | ZDHHC18  | 1 | 1  | 8  |
| III      | ZDHHC2   |   |    | 2  |
| III      | ZDHHC20  |   | 1  | 2  |
|          | ZDHHC23  |   | 2  | 6  |
| III      | ZDHHC24  |   |    |    |
| II + III | ZDHHC3   | 1 | 10 | 16 |
| III      | ZDHHC4   |   | 1  | 4  |
| II + III | ZDHHC5   | 3 | 10 | 14 |
| III      | ZDHHC6   |   | 1  |    |
| II + III | ZDHHC7   | 2 | 5  | 8  |
| III      | ZDHHC8   | 2 |    | 12 |
| II       | ZDHHC9   | 1 | 2  | 3  |
| II       | ZEB1     | 1 | 2  | 5  |
|          | ZEB1-AS1 |   | 1  |    |
|          | ZER1     |   |    | 2  |
| III      | ZFAND1   |   |    |    |
| III      | ZFAND2A  |   |    | 3  |
| III      | ZFAND2B  |   |    |    |
| III      | ZFAND3   |   | 4  | 5  |
| II       | ZFAND5   | 2 | 3  | 3  |
| II       | ZFAND6   | 1 | 1  | 1  |
|          | ZFAT     |   |    | 2  |
| II       | ZFC3H1   | 1 | 2  | 7  |
| II + III | ZFHX3    | 8 | 10 | 29 |
|          | ZFP1     |   | 1  | 3  |
| II + III | ZFP106   | 2 | 2  | 7  |
|          | ZFP161   |   |    |    |
|          | ZFP30    |   | 4  | 5  |
| II       | ZFP36    | 1 | 4  | 6  |
| II       | ZFP36L1  | 2 | 3  | 7  |
| II + III | ZFP36L2  | 5 | 8  | 17 |
|          | ZFP62    |   |    | 5  |
| II + III | ZFP64    | 2 | 8  | 9  |
|          | ZFP90    |   |    |    |

|          |          |   |   |    |
|----------|----------|---|---|----|
| III      | ZFPL1    |   | 3 | 2  |
|          | ZFR      |   | 2 | 11 |
| II + III | ZFX      | 3 | 7 | 6  |
|          | ZFYVE1   |   |   |    |
|          | ZFYVE16  |   | 1 | 2  |
| II       | ZFYVE19  | 1 | 2 | 4  |
| II + III | ZFYVE20  | 3 | 3 | 7  |
| III      | ZFYVE21  |   |   |    |
|          | ZFYVE26  |   |   | 4  |
| III      | ZFYVE27  |   | 2 | 4  |
|          | ZFYVE9   |   | 1 | 4  |
|          | ZGPAT    | 2 |   | 3  |
|          | ZHX1     |   | 3 | 3  |
| II + III | ZHX3     | 1 | 1 | 6  |
|          | ZIC2     |   | 6 | 6  |
| II + III | ZIC5     | 1 | 3 | 10 |
| II + III | ZKSCAN1  | 1 | 3 | 10 |
|          | ZKSCAN2  |   | 1 | 4  |
|          | ZKSCAN3  |   |   | 2  |
|          | ZKSCAN4  |   | 1 | 3  |
| II + III | ZKSCAN5  | 1 | 2 | 5  |
| II       | ZMAT2    | 1 | 2 | 3  |
|          | ZMAT3    |   |   | 1  |
| III      | ZMAT5    |   | 1 |    |
| II + III | ZMIZ1    | 1 | 4 | 6  |
| II       | ZMIZ2    | 1 | 2 | 6  |
| II       | ZMPSTE24 | 1 | 1 | 2  |
|          | ZMYM1    |   |   | 2  |
|          | ZMYM2    |   |   | 4  |
| II       | ZMYM3    | 1 | 2 | 3  |
|          | ZMYM4    |   | 1 | 1  |
|          | ZMYM5    |   |   |    |
|          | ZMYM6    |   |   | 1  |
| III      | ZMYM6NB  |   |   |    |
| III      | ZMYND11  |   |   |    |
| II       | ZMYND19  | 2 | 3 | 8  |
| II + III | ZMYND8   | 2 | 6 | 8  |
|          | ZNF10    |   |   | 1  |
|          | ZNF101   |   |   |    |
| II + III | ZNF12    | 2 | 2 | 9  |
| II + III | ZNF121   | 3 | 6 | 7  |
| II + III | ZNF131   | 2 | 3 | 6  |
|          | ZNF133   |   |   | 1  |
|          | ZNF134   |   |   | 3  |
| II + III | ZNF136   | 1 | 1 | 2  |
|          | ZNF138   |   | 1 | 5  |
|          | ZNF14    |   |   |    |
| II + III | ZNF140   | 2 | 1 | 4  |
| II + III | ZNF142   | 2 | 6 | 7  |
| III      | ZNF143   |   | 1 | 1  |
| II + III | ZNF146   | 1 | 8 | 8  |
| II + III | ZNF148   | 3 | 4 | 11 |

|          |         |   |   |    |
|----------|---------|---|---|----|
|          | ZNF16   |   |   | 2  |
| II + III | ZNF160  | 1 | 1 | 1  |
|          | ZNF17   |   | 1 |    |
|          | ZNF174  |   |   |    |
|          | ZNF175  |   | 2 | 6  |
|          | ZNF18   |   |   | 6  |
|          | ZNF180  |   | 1 | 4  |
|          | ZNF182  |   | 1 | 2  |
|          | ZNF184  |   | 2 | 5  |
| III      | ZNF185  |   |   |    |
|          | ZNF187  |   |   |    |
|          | ZNF189  |   |   | 1  |
|          | ZNF192  |   | 1 | 3  |
|          | ZNF193  |   | 1 | 3  |
|          | ZNF195  |   | 3 | 5  |
|          | ZNF197  |   |   | 7  |
|          | ZNF2    |   |   | 1  |
|          | ZNF200  |   | 1 | 4  |
| II + III | ZNF202  | 2 | 2 | 7  |
| III      | ZNF205  | 2 | 1 |    |
| II       | ZNF207  | 1 | 5 | 4  |
|          | ZNF212  | 1 |   | 2  |
| II       | ZNF213  | 1 | 1 | 11 |
|          | ZNF215  |   |   |    |
| II + III | ZNF217  | 3 | 4 | 4  |
| III      | ZNF219  |   | 1 | 3  |
|          | ZNF222  |   |   |    |
|          | ZNF226  |   |   | 1  |
|          | ZNF227  |   |   |    |
|          | ZNF23   |   |   | 1  |
|          | ZNF232  |   |   | 1  |
|          | ZNF236  |   | 1 | 3  |
| II + III | ZNF238  | 1 | 1 | 3  |
|          | ZNF239  |   | 1 | 3  |
|          | ZNF24   |   | 1 | 3  |
|          | ZNF248  | 1 |   | 4  |
|          | ZNF251  |   |   | 1  |
| III      | ZNF259  | 1 |   |    |
|          | ZNF26   |   |   | 3  |
|          | ZNF260  |   | 2 | 2  |
|          | ZNF263  |   | 3 | 6  |
|          | ZNF266  |   | 1 | 4  |
| III      | ZNF267  |   |   | 1  |
|          | ZNF268  |   |   | 4  |
| II + III | ZNF271  | 1 | 3 | 4  |
|          | ZNF274  |   | 2 | 3  |
| II + III | ZNF275  | 1 | 2 | 5  |
|          | ZNF276  |   | 1 | 5  |
|          | ZNF277  |   | 1 | 3  |
| III      | ZNF280D |   |   | 2  |
| II + III | ZNF281  | 1 | 6 | 10 |
|          | ZNF282  | 1 |   | 5  |

|          |         |   |   |    |
|----------|---------|---|---|----|
| II + III | ZNF286A | 2 | 2 | 8  |
| II + III | ZNF292  | 1 | 3 | 7  |
| II + III | ZNF295  | 4 | 3 | 12 |
|          | ZNF3    |   | 1 | 3  |
|          | ZNF30   |   |   |    |
|          | ZNF302  |   |   | 3  |
|          | ZNF304  |   | 1 | 4  |
| II + III | ZNF317  | 2 | 2 | 10 |
| II + III | ZNF318  | 2 | 2 | 10 |
| II + III | ZNF319  | 3 | 2 | 9  |
|          | ZNF320  |   | 2 | 10 |
|          | ZNF323  |   |   |    |
| II + III | ZNF324  | 1 | 1 | 7  |
| III      | ZNF326  |   |   |    |
|          | ZNF329  |   | 2 | 3  |
| III      | ZNF330  |   |   |    |
|          | ZNF331  |   |   |    |
| III      | ZNF335  |   | 1 |    |
|          | ZNF337  |   | 1 | 1  |
|          | ZNF33A  | 1 |   | 3  |
|          | ZNF341  |   |   | 2  |
|          | ZNF343  |   |   | 2  |
|          | ZNF346  |   | 3 | 6  |
| II + III | ZNF35   | 1 | 2 | 5  |
|          | ZNF350  |   |   | 1  |
|          | ZNF354A |   |   |    |
|          | ZNF354B |   |   | 3  |
| III      | ZNF358  |   |   |    |
| III      | ZNF362  |   |   | 3  |
| II       | ZNF367  | 1 | 1 | 2  |
|          | ZNF383  |   |   | 3  |
| II       | ZNF384  | 3 | 9 | 17 |
| III      | ZNF385A |   |   | 2  |
|          | ZNF394  |   | 1 | 4  |
|          | ZNF395  | 1 |   | 3  |
|          | ZNF397  |   |   |    |
| II + III | ZNF398  | 3 | 6 | 7  |
|          | ZNF407  |   |   | 1  |
|          | ZNF408  | 1 |   | 4  |
|          | ZNF41   |   | 3 | 9  |
| II + III | ZNF410  | 3 | 3 | 3  |
| III      | ZNF414  |   |   |    |
|          | ZNF416  |   |   | 4  |
|          | ZNF420  |   | 1 | 3  |
|          | ZNF426  |   |   |    |
| III      | ZNF428  |   |   | 1  |
|          | ZNF430  |   | 2 | 3  |
| II + III | ZNF434  | 1 | 3 | 3  |
|          | ZNF436  | 1 |   | 5  |
|          | ZNF44   | 1 |   |    |
| III      | ZNF444  |   | 2 | 3  |
| II + III | ZNF445  | 2 | 4 | 11 |

|          |         |   |    |    |
|----------|---------|---|----|----|
|          | ZNF446  |   |    | 2  |
|          | ZNF449  | 1 |    | 4  |
|          | ZNF45   | 1 | 1  |    |
| II + III | ZNF451  | 1 | 5  | 19 |
| II + III | ZNF460  | 9 | 10 | 18 |
| II + III | ZNF473  | 1 | 4  | 10 |
|          | ZNF48   |   | 1  | 2  |
|          | ZNF480  |   | 3  | 6  |
|          | ZNF484  |   | 1  | 3  |
|          | ZNF485  |   |    |    |
| II + III | ZNF496  | 3 | 5  | 13 |
| II + III | ZNF498  | 2 | 4  | 8  |
|          | ZNF500  |   | 1  | 2  |
| II + III | ZNF503  | 3 | 6  | 13 |
| II + III | ZNF507  | 1 | 2  | 4  |
|          | ZNF510  |   |    | 4  |
| III      | ZNF511  |   |    | 1  |
| III      | ZNF512  |   |    | 1  |
| III      | ZNF512B |   | 4  | 7  |
| II + III | ZNF513  | 1 | 1  | 6  |
|          | ZNF516  |   |    | 3  |
|          | ZNF521  |   |    | 1  |
| III      | ZNF524  |   |    |    |
| II + III | ZNF526  | 3 | 4  | 14 |
|          | ZNF529  |   |    | 1  |
|          | ZNF530  |   |    | 4  |
| II + III | ZNF543  | 2 | 3  | 7  |
| II + III | ZNF544  | 1 | 2  | 6  |
|          | ZNF548  |   | 1  | 4  |
| II + III | ZNF550  | 1 | 1  | 2  |
|          | ZNF552  |   |    |    |
|          | ZNF556  |   | 1  | 7  |
|          | ZNF557  |   |    | 3  |
|          | ZNF558  | 1 |    |    |
|          | ZNF561  |   |    | 6  |
| II + III | ZNF562  | 1 | 3  | 8  |
|          | ZNF566  |   | 1  | 2  |
|          | ZNF567  |   |    |    |
|          | ZNF57   |   | 2  | 3  |
|          | ZNF574  |   | 6  | 10 |
|          | ZNF576  | 2 |    | 1  |
| II       | ZNF579  | 1 | 2  | 5  |
| II       | ZNF580  | 1 | 1  | 1  |
| II + III | ZNF581  | 3 | 1  | 3  |
|          | ZNF584  |   | 1  | 2  |
|          | ZNF586  |   |    | 1  |
|          | ZNF589  |   | 1  | 1  |
| II + III | ZNF592  | 5 | 3  | 9  |
| III      | ZNF593  |   |    |    |
| II       | ZNF598  | 3 | 2  | 9  |
| II       | ZNF605  | 1 | 1  | 3  |
|          | ZNF609  |   | 11 | 15 |



|          |        |   |    |    |
|----------|--------|---|----|----|
|          | ZNF611 |   |    | 2  |
|          | ZNF613 |   |    |    |
|          | ZNF614 |   | 1  | 5  |
| II + III | ZNF615 | 1 | 2  | 5  |
|          | ZNF616 |   |    | 1  |
|          | ZNF622 |   | 1  | 2  |
| II + III | ZNF623 | 1 | 4  | 10 |
|          | ZNF627 |   | 1  | 1  |
| II + III | ZNF629 | 1 | 4  | 11 |
| II + III | ZNF638 | 2 | 3  | 7  |
|          | ZNF639 |   | 1  | 4  |
| II + III | ZNF641 | 1 | 1  | 5  |
|          | ZNF644 |   | 5  | 4  |
| II + III | ZNF646 | 6 | 10 | 29 |
|          | ZNF652 |   | 4  | 8  |
|          | ZNF655 |   | 2  | 1  |
| II       | ZNF664 | 2 | 5  | 11 |
|          | ZNF668 |   |    | 2  |
|          | ZNF669 |   |    |    |
|          | ZNF670 |   |    | 2  |
| II + III | ZNF672 | 4 | 10 | 17 |
|          | ZNF673 |   | 3  | 2  |
|          | ZNF675 |   | 6  | 9  |
|          | ZNF684 |   |    | 1  |
| II + III | ZNF687 | 6 | 9  | 21 |
|          | ZNF688 |   |    | 1  |
| II + III | ZNF689 | 1 | 3  | 9  |
| II + III | ZNF691 | 1 | 1  | 1  |
| III      | ZNF692 |   |    | 1  |
|          | ZNF7   |   |    | 5  |
| II + III | ZNF700 | 1 | 2  | 9  |
| II + III | ZNF703 | 6 | 11 | 20 |
| III      | ZNF706 |   |    |    |
| II + III | ZNF707 | 2 | 2  | 7  |
| II       | ZNF710 | 2 | 1  | 2  |
|          | ZNF721 | 1 |    | 5  |
|          | ZNF74  |   |    |    |
| II       | ZNF740 | 1 | 2  | 9  |
| II + III | ZNF746 | 5 | 1  | 10 |
|          | ZNF747 |   |    |    |
|          | ZNF749 |   |    | 2  |
|          | ZNF75A |   | 3  | 7  |
| III      | ZNF76  |   | 1  | 1  |
| II + III | ZNF761 | 1 | 4  | 3  |
| II + III | ZNF764 | 1 | 3  | 5  |
|          | ZNF766 |   | 1  | 1  |
| II       | ZNF768 | 2 | 4  | 8  |
|          | ZNF77  | 1 |    | 2  |
|          | ZNF770 |   | 7  | 10 |
| III      | ZNF771 |   |    |    |
| II + III | ZNF776 | 1 | 2  | 4  |
|          | ZNF777 |   | 1  | 5  |

|          |           |    |    |    |
|----------|-----------|----|----|----|
| II + III | ZNF778    | 2  | 3  | 6  |
|          | ZNF780A   |    | 2  | 4  |
|          | ZNF784    |    |    |    |
|          | ZNF786    |    |    | 2  |
| II       | ZNF787    | 2  | 2  | 10 |
|          | ZNF789    |    |    |    |
|          | ZNF79     |    | 1  | 2  |
|          | ZNF791    |    |    | 3  |
| II + III | ZNF8      | 3  | 5  | 13 |
| II + III | ZNF800    | 1  | 4  | 6  |
|          | ZNF808    |    | 4  | 5  |
|          | ZNF821    |    | 1  | 1  |
|          | ZNF823    |    |    |    |
|          | ZNF83     |    |    | 4  |
|          | ZNF830    |    |    |    |
| II + III | ZNF831    | 14 | 13 | 27 |
|          | ZNF839    |    |    | 2  |
|          | ZNF84     |    |    |    |
| II + III | ZNF841    | 1  | 2  | 3  |
| II + III | ZNF865    | 7  | 11 | 25 |
| III      | ZNF92     |    | 1  | 3  |
| II + III | ZNFX1     | 5  | 3  | 9  |
| III      | ZNFX1-AS1 |    | 3  | 6  |
| III      | ZNHIT1    |    |    | 1  |
|          | ZNHIT2    |    | 1  | 2  |
| III      | ZNHIT3    |    |    |    |
| III      | ZNHIT6    |    | 1  | 1  |
| III      | ZNRD1     |    | 1  |    |
| III      | ZNRF1     |    | 2  | 1  |
|          | ZNRF2     |    | 1  | 1  |
| II + III | ZNRF3     | 2  | 11 | 17 |
| III      | ZP3       |    |    |    |
| II + III | ZRANB1    | 2  | 2  | 2  |
| III      | ZRANB2    |    | 1  | 3  |
|          | ZRANB3    |    |    | 1  |
| III      | ZRSR2     |    |    | 1  |
| II + III | ZSCAN12   | 1  | 1  | 8  |
|          | ZSCAN16   |    |    |    |
|          | ZSCAN2    |    |    | 5  |
|          | ZSCAN21   |    |    |    |
| II + III | ZSCAN29   | 3  | 1  | 3  |
|          | ZSCAN30   |    |    | 1  |
| II + III | ZSWIM1    | 3  | 1  | 5  |
|          | ZSWIM3    |    |    | 4  |
| II + III | ZSWIM4    | 2  | 3  | 10 |
| II + III | ZSWIM6    | 1  | 4  | 8  |
| III      | ZSWIM7    |    |    |    |
|          | ZUFSP     |    |    | 1  |
|          | ZW10      |    |    | 1  |
| III      | ZWILCH    |    |    | 3  |
| II       | ZWINT     | 3  | 3  | 4  |
| II + III | ZXDC      | 2  | 3  | 7  |

|          |        |   |   |   |
|----------|--------|---|---|---|
|          | ZYG11A |   |   | 2 |
|          | ZYG11B |   | 2 | 2 |
| II       | ZYX    | 3 | 1 | 3 |
|          | ZZEF1  |   |   | 1 |
| II + III | ZZZ3   | 1 | 2 | 5 |

| RIP / Enrich- $\log_2$ (IP/Input) |                      | Ribosome profiling / change fold- $\log_2$ (siYTHDF2 /siControl) |                                                |                                                                       |
|-----------------------------------|----------------------|------------------------------------------------------------------|------------------------------------------------|-----------------------------------------------------------------------|
| rep1-polyA input                  | rep2-ribominus input | RPF( <b>Source Data to Figure 2b</b> )                           | mRNA input ( <b>Source Data to Figure 2a</b> ) | Translation Efficiency ( <b>Source Data to Extended Data Figure</b> ) |
| 1.752                             | 2.973                | -0.124                                                           | -0.653                                         | 0.529                                                                 |
| -2.976                            | -2.063               | -0.224                                                           | -0.158                                         | -0.066                                                                |
| -0.249                            | 0.700                | -0.469                                                           | -0.004                                         | -0.465                                                                |
| -0.084                            | -0.559               | 1.174                                                            | 0.391                                          | 0.782                                                                 |
| -1.843                            | -2.433               | -0.155                                                           | 0.026                                          | -0.181                                                                |
| -1.802                            | -2.260               | -0.099                                                           | -0.129                                         | 0.030                                                                 |
| 0.275                             | 0.213                | -0.387                                                           | -0.011                                         | -0.376                                                                |
| -2.060                            | -1.456               | 0.096                                                            | -0.286                                         | 0.382                                                                 |
| 0.207                             | 0.574                | 0.248                                                            | 0.346                                          | -0.098                                                                |
| 0.550                             | 0.750                | 0.399                                                            | 0.484                                          | -0.086                                                                |
| 2.282                             | 1.300                | 0.329                                                            | 0.289                                          | 0.040                                                                 |
| -1.140                            | -2.279               | 0.031                                                            | -0.165                                         | 0.195                                                                 |
| -1.811                            | -0.985               | -0.249                                                           | -0.037                                         | -0.211                                                                |
| 0.447                             | 0.165                | -0.105                                                           | 0.397                                          | -0.502                                                                |
| -0.810                            | -0.098               | -0.322                                                           | -0.463                                         | 0.141                                                                 |
| -0.619                            | 0.111                | -0.042                                                           | -0.178                                         | 0.136                                                                 |
| 0.118                             | -0.610               | 0.850                                                            | 0.678                                          | 0.172                                                                 |
| -1.399                            | -0.912               | 0.228                                                            | -0.323                                         | 0.552                                                                 |
| 0.894                             | -0.287               | 0.265                                                            | 0.755                                          | -0.489                                                                |
| -0.696                            | -0.340               | -0.023                                                           | -0.484                                         | 0.461                                                                 |
| 0.690                             | -0.301               | -0.053                                                           | 0.257                                          | -0.310                                                                |
| -1.473                            | -1.069               | 0.014                                                            | 0.137                                          | -0.124                                                                |
| 0.610                             | 0.574                | 0.170                                                            | -0.033                                         | 0.203                                                                 |
| 1.752                             | 2.106                | -0.061                                                           | -0.148                                         | 0.087                                                                 |
| 0.285                             | 0.272                | -0.003                                                           | -0.298                                         | 0.294                                                                 |
| -0.646                            | -0.030               | -0.206                                                           | -0.102                                         | -0.104                                                                |
| 1.337                             | 0.295                | -0.018                                                           | 0.266                                          | -0.284                                                                |
| -0.258                            | -0.331               | 0.710                                                            | 0.318                                          | 0.392                                                                 |
| -0.226                            | 0.497                | -1.651                                                           | -0.757                                         | -0.894                                                                |
| 0.731                             | -0.159               | -0.063                                                           | 0.431                                          | -0.494                                                                |
| -0.358                            | 0.199                | 0.115                                                            | -0.107                                         | 0.222                                                                 |
| -1.313                            | -2.326               | -0.084                                                           | 0.760                                          | -0.844                                                                |
| 0.495                             | 0.815                | 0.249                                                            | 0.520                                          | -0.272                                                                |
| 0.376                             | 0.573                | 0.142                                                            | 0.617                                          | -0.475                                                                |
| -0.299                            | 0.189                | 0.291                                                            | 0.088                                          | 0.203                                                                 |
| -0.321                            | -0.879               | -0.598                                                           | 0.489                                          | -1.087                                                                |
| -0.258                            | -1.084               | 0.241                                                            | 0.284                                          | -0.043                                                                |
| 0.480                             | 1.207                | 0.437                                                            | -0.273                                         | 0.711                                                                 |
| -1.161                            | -0.564               | 0.084                                                            | -0.021                                         | 0.106                                                                 |
| 2.460                             | 1.534                | 0.140                                                            | -0.215                                         | 0.354                                                                 |

|        |        |        |        |        |
|--------|--------|--------|--------|--------|
| -2.877 | -2.403 | -0.674 | -0.695 | 0.021  |
| 2.371  | 2.315  | 0.148  | 0.342  | -0.193 |
| -1.514 | -1.211 | -0.141 | -0.256 | 0.115  |
| 0.393  | 0.004  | -0.542 | -0.124 | -0.418 |
| 0.037  | -0.739 | 0.008  | -0.133 | 0.141  |
| -1.608 | -1.000 | -0.242 | -0.374 | 0.132  |
| 0.308  | -0.181 | 0.356  | 0.196  | 0.161  |
| 0.734  | 0.902  | 0.305  | -0.517 | 0.822  |
| 0.526  | 0.998  | 0.559  | -0.320 | 0.879  |
| -0.403 | -1.113 | -0.016 | -0.029 | 0.013  |
| 0.458  | 0.738  | -0.540 | -0.202 | -0.339 |
| 1.162  | 1.467  | -0.177 | -0.246 | 0.069  |
| 2.028  | 1.339  | 0.604  | 0.567  | 0.037  |
| 0.791  | 0.153  | -0.356 | -0.038 | -0.318 |
| -1.640 | -1.364 | -0.201 | -0.724 | 0.523  |
| 0.751  | 0.879  | -0.170 | -0.074 | -0.096 |
| -2.481 | -2.052 | 0.202  | -0.194 | 0.396  |
| 0.341  | 0.411  | -0.115 | -0.211 | 0.096  |
| 0.213  | 0.957  | -0.106 | -0.260 | 0.154  |
| -0.994 | -0.609 | -0.244 | -0.370 | 0.126  |
| -1.262 | -1.302 | -0.101 | 0.561  | -0.662 |
| 0.531  | 0.461  | 0.233  | 0.484  | -0.251 |
| 0.240  | 0.327  | 0.109  | 0.037  | 0.072  |
| 0.080  | 0.326  | 0.193  | 0.305  | -0.112 |
| 0.886  | 1.010  | 0.193  | -0.217 | 0.410  |
| 0.171  | 0.164  | -0.055 | 0.144  | -0.200 |
| -1.379 | -1.809 | 0.162  | -0.100 | 0.262  |
| -0.580 | -0.166 | 0.458  | -1.024 | 1.482  |
| -0.206 | -0.841 | -0.303 | 0.328  | -0.631 |
| -2.400 | -1.748 | -0.485 | 0.161  | -0.647 |
| 0.264  | -1.220 | 0.053  | 0.119  | -0.066 |
| -1.130 | -0.427 | -0.320 | -0.717 | 0.398  |
| -2.429 | -2.446 | -0.110 | 0.145  | -0.255 |
| -2.771 | -2.507 | 0.494  | 0.286  | 0.209  |
| 0.268  | 0.612  | 0.213  | -0.021 | 0.235  |
| -0.896 | -0.719 | 0.236  | -0.388 | 0.623  |
| 0.093  | -0.735 | 0.329  | 0.165  | 0.164  |
| -1.280 | -1.078 | 0.038  | -0.268 | 0.306  |
| -0.081 | 0.275  | 0.191  | 0.006  | 0.185  |
| -2.706 | -2.464 | -0.021 | -0.543 | 0.521  |
| 0.333  | -0.732 | -0.518 | -0.113 | -0.405 |
| -2.464 | -1.780 | 0.172  | 0.551  | -0.379 |
| 0.036  | -0.155 | -0.326 | 0.097  | -0.423 |
| -1.577 | -1.432 | 0.294  | -0.464 | 0.758  |
| -0.095 | -0.723 | 0.817  | 0.364  | 0.454  |
| -1.259 | -0.975 | -0.003 | 0.226  | -0.228 |
| -2.072 | -1.889 | 0.117  | -0.005 | 0.122  |
| 0.516  | 0.959  | 0.704  | -0.262 | 0.966  |
| -2.653 | -1.007 | -0.196 | -0.288 | 0.092  |
| -2.406 | -2.163 | -0.124 | -0.395 | 0.272  |
| -0.453 | -0.724 | 0.177  | -0.231 | 0.408  |

|        |        |        |        |        |
|--------|--------|--------|--------|--------|
| 0.343  | -0.391 | 0.147  | -0.227 | 0.374  |
| 0.960  | 0.946  | 0.391  | 0.006  | 0.385  |
| -3.345 | -3.511 | -0.004 | -0.136 | 0.132  |
| 1.104  | 1.294  | 0.087  | 0.443  | -0.356 |
| -0.993 | -0.844 | -0.182 | -0.433 | 0.252  |
| 2.510  | 1.858  | -1.061 | -0.425 | -0.636 |
| -0.765 | 0.747  | 0.095  | 0.569  | -0.475 |
| -0.142 | 0.291  | -0.015 | -0.114 | 0.100  |
| 1.416  | 0.818  | 0.560  | 0.142  | 0.418  |
| 0.399  | -0.319 | -0.033 | 0.265  | -0.298 |
| 0.870  | -0.315 | 0.334  | 0.631  | -0.297 |
| -1.014 | -0.729 | 0.732  | 0.027  | 0.705  |
| -0.922 | -0.351 | 0.265  | -0.752 | 1.017  |
| -1.641 | -0.296 | -0.392 | 0.027  | -0.419 |
| -0.782 | 0.109  | -0.069 | -0.240 | 0.171  |
| -1.906 | -1.922 | 0.044  | 0.323  | -0.279 |
| -1.057 | -0.590 | -0.828 | -0.302 | -0.526 |
| -0.194 | 1.498  | 0.300  | 0.233  | 0.067  |
| -1.087 | 0.000  | -0.353 | 0.268  | -0.621 |
| -0.670 | -1.518 | 0.230  | -0.038 | 0.268  |
| -0.646 | -0.206 | -0.396 | -0.176 | -0.220 |
| -1.267 | -0.851 | -0.065 | -0.467 | 0.402  |
| -0.634 | -1.211 | 0.134  | 0.918  | -0.784 |
| -1.323 | -2.171 | -0.036 | 0.267  | -0.303 |
| -0.474 | -0.577 | 0.034  | -0.283 | 0.316  |
| 1.572  | 1.350  | 0.444  | -0.155 | 0.599  |
| -1.319 | -1.992 | 0.606  | 0.475  | 0.131  |
| 0.847  | 0.251  | 0.228  | 0.298  | -0.069 |
| 2.584  | 2.175  | -0.192 | 0.080  | -0.272 |
| 0.484  | 0.763  | -1.270 | -0.608 | -0.662 |
| 1.023  | 0.506  | 0.225  | -0.088 | 0.313  |
| -1.428 | -0.723 | 0.130  | -0.323 | 0.453  |
| -1.259 | -1.614 | 0.564  | -0.521 | 1.085  |
| -1.499 | -1.169 | -0.619 | -1.009 | 0.390  |
| -0.540 | -1.267 | 0.074  | 0.077  | -0.003 |
| 1.460  | 0.261  | 0.009  | 0.853  | -0.844 |
| -1.417 | -1.127 | -0.932 | -0.753 | -0.179 |
| 1.667  | 0.619  | -0.041 | 0.240  | -0.281 |
| 1.060  | 0.629  | -0.158 | 0.756  | -0.914 |
| 0.253  | -0.541 | -0.296 | 0.331  | -0.627 |
| 2.082  | 1.509  | -0.769 | -0.090 | -0.679 |
| 1.769  | 1.002  | 0.021  | 0.647  | -0.626 |
| 1.289  | 1.278  | 0.073  | 0.329  | -0.256 |
| 1.217  | 1.404  | -0.351 | -0.022 | -0.329 |
| 2.259  | 1.557  | -0.369 | -0.140 | -0.230 |
| -0.281 | -0.771 | -0.251 | -0.581 | 0.330  |
| -1.017 | -0.770 | -0.451 | -0.283 | -0.168 |
| 0.823  | 0.978  | 0.343  | -0.244 | 0.587  |
| -0.286 | -0.037 | -0.154 | -0.230 | 0.076  |
| -0.994 | -0.362 | 0.573  | 0.102  | 0.472  |
| 1.262  | 1.120  | -0.098 | -0.204 | 0.105  |

|        |        |        |        |        |
|--------|--------|--------|--------|--------|
| -0.184 | -0.041 | -0.587 | -0.175 | -0.411 |
| 2.044  | 1.547  | -0.363 | -0.371 | 0.008  |
| 1.814  | 1.716  | 0.009  | -0.002 | 0.011  |
| -0.509 | -0.018 | 0.049  | 0.102  | -0.053 |
| -0.923 | -0.685 | -0.271 | -0.365 | 0.094  |
| 0.201  | -1.232 | -1.050 | -0.083 | -0.967 |
| -0.897 | -1.319 | 0.100  | 0.720  | -0.621 |
| -2.700 | -2.659 | -0.446 | -0.622 | 0.176  |
| -2.330 | -2.116 | 0.173  | 0.049  | 0.124  |
| 1.115  | 0.763  | 0.125  | -0.341 | 0.467  |
| -0.961 | -1.405 | -0.667 | -0.724 | 0.057  |
| 0.979  | 1.293  | -0.159 | -0.445 | 0.286  |
| 2.213  | 2.497  | 0.233  | 0.235  | -0.003 |
| 3.305  | 2.573  | 0.487  | 0.342  | 0.144  |
| 2.291  | 2.048  | 0.032  | -0.496 | 0.528  |
| 1.855  | 1.778  | -0.284 | -0.367 | 0.083  |
| -0.942 | -0.522 | -0.076 | -0.628 | 0.552  |
| 1.305  | 1.543  | 0.009  | -0.110 | 0.119  |
| 1.805  | 2.326  | -0.062 | -0.542 | 0.480  |
| 0.836  | 1.157  | -1.149 | -0.978 | -0.171 |
| -1.649 | -1.269 | 0.044  | -0.214 | 0.258  |
| -2.634 | -2.011 | -0.127 | -0.540 | 0.414  |
| -1.954 | -1.337 | -0.077 | -0.211 | 0.134  |
| -0.180 | -1.028 | 0.251  | 0.240  | 0.011  |
| -0.784 | -0.869 | -0.004 | -0.715 | 0.711  |
| -0.372 | -0.632 | -0.276 | -0.258 | -0.018 |
| 0.543  | 0.060  | 0.336  | -0.431 | 0.767  |
| -3.421 | -2.728 | 0.237  | -0.572 | 0.809  |
| 1.073  | 0.853  | -0.204 | 0.206  | -0.410 |
| -0.786 | -0.695 | -0.214 | -0.129 | -0.085 |
| 1.617  | 1.441  | -0.594 | -0.208 | -0.386 |
| 1.512  | 0.579  | 0.848  | 0.898  | -0.050 |
| 0.410  | 0.816  | 0.534  | 0.205  | 0.329  |
| 0.251  | 0.164  | 0.067  | 0.494  | -0.427 |
| -1.401 | -1.315 | -0.265 | -0.846 | 0.581  |
| 2.184  | 1.669  | 0.191  | 0.171  | 0.020  |
| -1.243 | -1.612 | -0.288 | -0.095 | -0.193 |
| 0.926  | 1.212  | 0.221  | 0.100  | 0.121  |
| -0.717 | -0.026 | 0.111  | -0.150 | 0.261  |
| -0.992 | -0.630 | 0.169  | -0.336 | 0.504  |
| 0.206  | -0.908 | -0.552 | 0.087  | -0.639 |
| -1.857 | -1.614 | -0.847 | -0.138 | -0.709 |
| -0.722 | -1.388 | -0.050 | -0.017 | -0.034 |
| -0.555 | -0.706 | -0.192 | 0.602  | -0.794 |
| 0.913  | 0.173  | -0.023 | 0.604  | -0.627 |
| -0.259 | -0.293 | -0.249 | -0.491 | 0.241  |
| -2.840 | -2.281 | -0.184 | -0.011 | -0.173 |
| -0.967 | -0.446 | -0.282 | -0.453 | 0.171  |
| 0.808  | 1.100  | -0.071 | -0.178 | 0.106  |
| 1.430  | 0.400  | 0.293  | 0.014  | 0.279  |
| 1.904  | 2.404  | 0.076  | 0.138  | -0.062 |

|        |        |        |        |        |
|--------|--------|--------|--------|--------|
| -0.580 | -1.124 | -0.786 | -0.530 | -0.256 |
| -0.287 | 0.218  | 0.191  | -0.896 | 1.087  |
| -0.560 | -1.369 | 0.102  | 0.202  | -0.100 |
| -0.583 | 0.078  | -0.327 | 0.049  | -0.376 |
| 1.467  | 0.192  | 0.375  | -0.034 | 0.409  |
| -2.028 | -1.510 | 0.622  | -0.611 | 1.233  |
| -0.820 | -0.806 | -0.272 | -0.604 | 0.332  |
| 1.875  | 0.995  | 0.439  | 1.251  | -0.812 |
| -1.350 | -1.055 | 0.296  | 0.068  | 0.228  |
| -0.776 | -1.216 | 0.065  | -0.157 | 0.222  |
| -0.566 | -0.702 | -0.016 | -0.140 | 0.123  |
| 1.939  | 2.288  | 0.118  | -0.242 | 0.360  |
| -0.030 | -0.758 | 0.137  | 0.471  | -0.334 |
| 1.239  | 1.216  | 0.567  | 1.575  | -1.008 |
| 1.380  | 1.363  | -0.406 | 0.891  | -1.297 |
| 2.431  | 0.956  | 0.466  | 0.399  | 0.067  |
| 2.084  | 2.031  | 0.208  | 0.197  | 0.011  |
| -1.764 | -0.963 | 0.068  | 0.168  | -0.101 |
| -0.186 | -0.416 | 1.411  | 0.635  | 0.776  |
| -2.562 | -1.985 | 0.197  | -0.126 | 0.323  |
| -1.269 | -0.978 | -0.247 | 0.624  | -0.871 |
| -0.495 | -0.040 | -0.159 | -0.056 | -0.103 |
| -1.325 | -1.422 | 0.428  | 0.047  | 0.381  |
| -2.245 | -1.605 | 0.030  | 0.346  | -0.315 |
| -0.850 | -1.079 | 0.103  | 0.061  | 0.042  |
| -2.349 | -1.791 | -0.185 | -0.283 | 0.099  |
| 0.368  | 0.338  | 0.329  | 0.020  | 0.309  |
| -1.851 | -1.388 | 0.291  | -0.678 | 0.969  |
| -1.578 | -1.554 | -0.105 | 0.375  | -0.480 |
| 0.294  | -0.650 | 0.027  | 0.394  | -0.367 |
| 2.214  | 1.968  | -0.314 | 0.324  | -0.638 |
| 1.690  | 0.955  | 0.004  | -0.212 | 0.216  |
| 1.234  | 0.287  | 0.399  | 0.907  | -0.509 |
| -0.068 | 0.196  | 0.301  | 0.494  | -0.193 |
| 1.450  | 1.230  | -0.053 | 0.581  | -0.634 |
| 0.077  | -0.207 | 0.262  | -0.144 | 0.406  |
| 1.081  | 1.604  | 0.151  | 0.202  | -0.051 |
| -2.205 | -1.212 | 0.195  | -0.121 | 0.316  |
| -0.646 | -0.467 | 0.109  | 0.724  | -0.615 |
| -1.141 | -0.718 | -0.185 | -0.363 | 0.179  |
| -0.161 | -0.622 | 0.148  | 0.266  | -0.118 |
| -0.564 | 0.072  | 0.019  | -0.392 | 0.412  |
| -2.467 | -2.341 | -0.267 | -1.043 | 0.776  |
| -2.600 | -2.271 | 0.085  | 0.202  | -0.116 |
| -1.897 | -1.320 | 0.165  | -0.011 | 0.176  |
| -1.022 | -0.368 | 0.166  | -0.540 | 0.706  |
| -2.562 | -1.150 | -1.205 | -0.840 | -0.364 |
| -0.200 | 0.566  | 0.327  | -0.138 | 0.464  |
| 0.711  | 0.184  | 0.676  | 0.148  | 0.528  |
| 0.362  | -0.007 | 0.369  | 0.816  | -0.447 |
| -0.910 | -0.301 | -0.026 | -0.184 | 0.158  |



|        |        |        |        |        |
|--------|--------|--------|--------|--------|
| -0.934 | -0.722 | 0.192  | -0.030 | 0.222  |
| -1.378 | -0.880 | 0.163  | -0.160 | 0.323  |
| -0.393 | -0.371 | 0.012  | 0.741  | -0.729 |
| 0.420  | 0.213  | 0.395  | 0.099  | 0.296  |
| 2.968  | 2.675  | 0.249  | 0.271  | -0.022 |
| 0.554  | -0.038 | -0.085 | 0.028  | -0.113 |
| -0.131 | 0.421  | -0.312 | -0.430 | 0.117  |
| -0.557 | -0.213 | -0.427 | 0.406  | -0.832 |
| 0.839  | 0.315  | -1.013 | 0.284  | -1.297 |
| -0.101 | -0.726 | -0.027 | -0.129 | 0.102  |
| -1.656 | -1.607 | -0.595 | 0.638  | -1.233 |
| -0.595 | -0.996 | 0.539  | 0.482  | 0.057  |
| -2.502 | -0.994 | -0.497 | -0.134 | -0.363 |
| -2.233 | -1.812 | 0.268  | -0.037 | 0.305  |
| -0.932 | -0.821 | -0.147 | -0.131 | -0.016 |
| 1.804  | 0.456  | 0.293  | 0.650  | -0.357 |
| 2.208  | 1.652  | 0.023  | 0.695  | -0.672 |
| 0.068  | 0.513  | -0.115 | -0.675 | 0.560  |
| -0.862 | -0.994 | 0.614  | 0.082  | 0.532  |
| -0.423 | -0.450 | 0.405  | -0.459 | 0.864  |
| 2.516  | 2.538  | 0.264  | -0.250 | 0.514  |
| -3.489 | -2.784 | -0.314 | -0.327 | 0.013  |
| -2.491 | -2.515 | -0.128 | -0.043 | -0.085 |
| -0.138 | -0.724 | 0.355  | 0.253  | 0.102  |
| -2.957 | -3.058 | -0.164 | 0.359  | -0.523 |
| -0.259 | -0.700 | -0.425 | -0.937 | 0.512  |
| 2.641  | 1.534  | 0.227  | -0.317 | 0.544  |
| -0.654 | 0.075  | 0.267  | -0.499 | 0.766  |
| -0.446 | 0.205  | -0.098 | -0.432 | 0.334  |
| 2.116  | 2.334  | 0.185  | -0.346 | 0.531  |
| -0.045 | 0.153  | 0.081  | -0.581 | 0.662  |
| -1.499 | -0.914 | -0.416 | -0.765 | 0.349  |
| -1.586 | -1.220 | 0.059  | -1.155 | 1.215  |
| 0.658  | 0.314  | -0.061 | 0.349  | -0.410 |
| 2.676  | 1.686  | 0.296  | 0.551  | -0.255 |
| -0.235 | 0.641  | -0.879 | -0.292 | -0.588 |
| 2.564  | 1.765  | 0.088  | 0.897  | -0.809 |
| -1.364 | -0.739 | -1.351 | -0.770 | -0.581 |
| 2.101  | 1.613  | 0.380  | 0.364  | 0.016  |
| -2.138 | -1.783 | 0.430  | -0.562 | 0.992  |
| 1.658  | 1.810  | 0.291  | 0.299  | -0.008 |
| 0.085  | -1.318 | 0.068  | -0.006 | 0.073  |
| -0.954 | -1.383 | -0.017 | -0.126 | 0.110  |
| -1.477 | -1.219 | 0.506  | -0.281 | 0.787  |
| -0.240 | -0.584 | -0.069 | -0.145 | 0.076  |
| 1.923  | 2.451  | -0.351 | 0.396  | -0.746 |
| -0.660 | -1.387 | -1.137 | -0.103 | -1.034 |
| 2.294  | 2.275  | 0.409  | 0.280  | 0.129  |
| -0.943 | -1.342 | 0.238  | -0.137 | 0.375  |
| 1.649  | 1.165  | 0.197  | 0.395  | -0.198 |
| 1.802  | 1.696  | 0.307  | 0.063  | 0.244  |

|        |        |        |        |        |
|--------|--------|--------|--------|--------|
| -0.956 | -0.685 | -0.224 | -0.230 | 0.006  |
| -1.299 | -1.340 | 0.199  | 0.908  | -0.709 |
| -0.988 | -1.007 | 0.613  | -0.042 | 0.656  |
| 0.078  | -0.052 | 1.019  | -0.565 | 1.583  |
| 1.641  | 0.943  | 0.313  | 0.798  | -0.485 |
| -1.516 | -2.045 | -0.230 | -0.177 | -0.053 |
| -2.673 | -2.538 | 0.409  | -0.898 | 1.308  |
| -0.689 | -1.141 | 0.153  | -0.375 | 0.528  |
| -2.660 | -2.491 | -0.153 | -0.096 | -0.057 |
| -0.198 | 0.362  | 0.022  | -0.345 | 0.367  |
| -0.203 | -0.767 | 0.360  | 0.364  | -0.004 |
| -0.789 | -0.851 | -0.143 | -0.058 | -0.084 |
| 0.419  | 0.333  | 0.106  | 0.006  | 0.099  |
| 0.365  | 0.407  | -0.137 | -0.361 | 0.223  |
| 1.324  | 0.471  | 0.058  | -0.240 | 0.298  |
| 1.834  | 1.431  | 0.378  | 0.336  | 0.042  |
| 0.619  | 1.298  | -0.510 | -0.266 | -0.245 |
| 2.007  | 0.493  | -0.218 | 0.092  | -0.310 |
| 1.929  | 1.653  | 0.008  | -0.071 | 0.080  |
| 0.144  | -0.646 | 0.156  | 0.105  | 0.052  |
| 1.951  | 1.416  | 0.042  | -0.013 | 0.055  |
| 0.046  | 1.248  | 0.083  | 0.295  | -0.212 |
| 0.101  | -0.337 | 0.366  | 0.853  | -0.487 |
| 0.311  | -0.001 | -0.654 | -0.138 | -0.516 |
| -0.011 | 0.992  | -0.214 | -0.689 | 0.475  |
| 0.213  | -0.941 | -0.289 | -0.098 | -0.191 |
| -1.458 | -0.918 | 0.419  | -0.440 | 0.860  |
| -0.268 | -0.029 | 0.115  | -0.915 | 1.030  |
| 0.501  | 0.140  | -0.018 | 0.563  | -0.581 |
| -1.039 | -0.868 | 1.546  | 0.407  | 1.139  |
| -0.876 | -0.821 | 0.884  | 0.501  | 0.383  |
| 1.750  | 1.268  | 0.065  | -0.226 | 0.292  |
| 2.011  | 0.998  | 0.137  | 0.203  | -0.066 |
| 1.170  | 0.889  | -0.232 | -0.238 | 0.005  |
| 1.924  | 0.585  | 0.254  | -0.058 | 0.313  |
| 2.514  | 2.146  | 0.911  | 0.777  | 0.133  |
| -0.171 | -0.786 | 0.186  | -0.433 | 0.619  |
| -1.221 | -1.040 | 0.626  | 0.078  | 0.548  |
| 1.994  | 1.634  | 0.015  | -0.266 | 0.281  |
| 0.516  | -0.238 | 0.483  | 0.316  | 0.167  |
| 1.917  | 1.310  | -0.270 | 0.311  | -0.581 |
| 1.794  | 1.058  | -0.149 | 0.051  | -0.200 |
| 2.462  | 1.667  | -0.238 | 0.418  | -0.656 |
| -1.303 | 0.316  | -1.247 | -0.546 | -0.700 |
| -1.257 | -0.827 | 0.508  | -0.046 | 0.554  |
| 0.101  | 0.524  | 0.227  | -1.408 | 1.634  |
| 0.728  | 0.862  | -0.115 | -0.039 | -0.076 |
| -1.331 | -0.895 | 0.358  | -0.375 | 0.734  |
| 0.765  | 0.815  | -0.058 | -0.223 | 0.165  |
| -0.956 | 0.116  | -0.029 | 0.040  | -0.069 |
| -0.483 | -2.048 | -0.170 | 0.569  | -0.739 |

|        |        |        |        |        |
|--------|--------|--------|--------|--------|
| -0.118 | -0.090 | -0.351 | -0.096 | -0.254 |
| 0.282  | 0.294  | -1.437 | -0.895 | -0.543 |
| 0.856  | 0.141  | -0.517 | -0.342 | -0.174 |
| 0.914  | 0.027  | 0.084  | 0.249  | -0.165 |
| -0.500 | -0.246 | -0.354 | -0.694 | 0.340  |
| -3.086 | -2.413 | -0.528 | 0.396  | -0.924 |
| -3.086 | 0.106  | -0.211 | -0.104 | -0.107 |
| -3.719 | -3.487 | 0.141  | 0.414  | -0.273 |
| 1.245  | 0.960  | -0.402 | 0.314  | -0.716 |
| -1.626 | -1.912 | 0.116  | 0.046  | 0.071  |
| -1.411 | -0.977 | -0.452 | -0.406 | -0.046 |
| -1.223 | -1.081 | -0.666 | 0.377  | -1.043 |
| -1.671 | -1.729 | -0.416 | -0.343 | -0.073 |
| -1.675 | -1.363 | -0.350 | -0.537 | 0.186  |
| -1.905 | -1.629 | -0.161 | -0.146 | -0.015 |
| -1.158 | -0.713 | -0.019 | -0.028 | 0.009  |
| -1.138 | -1.444 | 0.098  | -0.259 | 0.357  |
| -1.403 | -1.920 | 0.567  | 0.031  | 0.535  |
| -1.075 | -0.387 | -0.006 | -0.101 | 0.095  |
| 1.847  | 1.292  | 0.335  | 0.456  | -0.121 |
| -0.518 | 0.762  | -0.447 | -0.528 | 0.081  |
| -3.585 | -3.108 | 0.337  | 0.149  | 0.187  |
| -2.842 | -2.600 | 0.051  | -0.138 | 0.189  |
| -1.924 | -1.966 | -1.498 | 0.187  | -1.685 |
| -1.751 | -2.223 | -0.293 | -0.658 | 0.366  |
| -1.324 | -0.839 | 0.159  | -0.162 | 0.321  |
| -0.518 | -0.201 | 0.286  | -0.133 | 0.419  |
| 0.046  | 0.038  | 0.100  | 0.441  | -0.341 |
| -1.874 | -1.615 | 0.100  | -0.379 | 0.478  |
| -2.948 | -2.275 | 0.361  | -0.543 | 0.904  |
| -0.317 | -0.899 | 0.283  | 0.340  | -0.057 |
| -0.979 | -0.066 | -0.281 | -0.458 | 0.177  |
| -1.049 | -1.941 | -0.135 | 0.221  | -0.356 |
| 2.003  | 1.635  | 0.684  | 0.421  | 0.263  |
| -1.215 | -1.508 | 0.597  | 0.201  | 0.396  |
| 1.304  | 0.968  | 0.220  | 0.195  | 0.025  |
| 1.331  | 0.346  | 0.454  | 0.307  | 0.148  |
| 0.248  | 0.571  | 0.971  | 0.375  | 0.596  |
| 1.274  | 1.914  | 0.396  | 0.327  | 0.069  |
| 2.488  | 1.599  | -0.244 | -0.065 | -0.179 |
| 0.498  | 1.011  | -0.049 | -0.380 | 0.331  |
| -1.138 | -0.760 | -0.212 | -0.026 | -0.186 |
| 0.844  | 0.066  | 0.972  | 0.792  | 0.180  |
| 0.231  | 0.918  | -0.303 | -0.849 | 0.546  |
| 2.315  | 1.537  | 0.422  | 0.081  | 0.341  |
| -1.038 | -0.511 | 0.526  | -0.195 | 0.721  |
| 1.266  | 0.597  | 0.345  | 1.068  | -0.723 |
| -1.735 | -1.375 | 0.005  | 0.016  | -0.011 |
| -0.859 | -0.781 | -0.238 | 0.174  | -0.412 |
| 0.627  | 1.109  | 0.070  | 0.110  | -0.040 |
| -1.802 | -1.424 | -0.171 | -0.419 | 0.249  |

|        |        |        |        |        |
|--------|--------|--------|--------|--------|
| -0.109 | -1.020 | -0.513 | 0.697  | -1.210 |
| -1.716 | -1.978 | -0.773 | 0.370  | -1.144 |
| -2.268 | -1.387 | 0.371  | 0.061  | 0.309  |
| -0.634 | -0.375 | -0.175 | 0.378  | -0.552 |
| -1.536 | -1.324 | 0.038  | -0.427 | 0.466  |
| -1.392 | -1.014 | -0.331 | -0.071 | -0.260 |
| -0.658 | -0.014 | -0.105 | -0.252 | 0.148  |
| -3.126 | -2.923 | 0.029  | -0.081 | 0.111  |
| -2.325 | -2.611 | -0.232 | 0.141  | -0.374 |
| -0.027 | 0.423  | 0.318  | -0.235 | 0.553  |
| -0.402 | -0.276 | -0.302 | 0.525  | -0.827 |
| 0.631  | -0.057 | 0.574  | 0.461  | 0.113  |
| 0.167  | -1.340 | -0.632 | -0.048 | -0.584 |
| 0.623  | 0.464  | 0.330  | 0.151  | 0.179  |
| -3.181 | -2.655 | -0.151 | -0.515 | 0.365  |
| -0.760 | -0.897 | 0.331  | -0.215 | 0.546  |
| -2.671 | -1.409 | -0.967 | -0.408 | -0.559 |
| 1.095  | 0.011  | -0.476 | 0.275  | -0.752 |
| -0.809 | -0.323 | -0.469 | -0.522 | 0.053  |
| -0.861 | -0.173 | 0.093  | -0.026 | 0.119  |
| -0.062 | 0.428  | 0.423  | 0.309  | 0.114  |
| -1.450 | -1.622 | 0.082  | 0.069  | 0.013  |
| -2.172 | -1.966 | -0.502 | -0.388 | -0.114 |
| -2.944 | -2.434 | 0.000  | 0.214  | -0.214 |
| -2.583 | -2.318 | -0.912 | -0.321 | -0.591 |
| -2.997 | -2.450 | -0.217 | -0.758 | 0.541  |
| 1.824  | 1.655  | 0.237  | 0.234  | 0.003  |
| 1.142  | 1.591  | -0.159 | -0.356 | 0.197  |
| -1.405 | -1.185 | 0.178  | -0.270 | 0.448  |
| -0.694 | -1.759 | -0.031 | 0.030  | -0.061 |
| 1.195  | 0.212  | 0.181  | 0.478  | -0.297 |
| 2.376  | 0.814  | 0.054  | 0.416  | -0.362 |
| -0.054 | -1.366 | 0.292  | 0.183  | 0.110  |
| -0.235 | 0.216  | -0.009 | -0.123 | 0.114  |
| -1.419 | -0.803 | 0.100  | -0.267 | 0.368  |
| -0.803 | -1.252 | -0.497 | -0.272 | -0.225 |
| -0.959 | -0.981 | 0.652  | 0.029  | 0.623  |
| -1.033 | -0.631 | 0.222  | -0.559 | 0.781  |
| -0.025 | -0.362 | 0.197  | -0.055 | 0.252  |
| 0.677  | 0.500  | 0.200  | 0.642  | -0.441 |
| 0.648  | 0.597  | 0.157  | 0.105  | 0.051  |
| 2.497  | 1.056  | 0.701  | 0.353  | 0.348  |
| 0.599  | 2.108  | -0.282 | -0.367 | 0.085  |
| -0.062 | -1.068 | -1.320 | -0.547 | -0.773 |
| 1.813  | 1.324  | -0.442 | 0.632  | -1.074 |
| 0.441  | 0.964  | -0.159 | -0.010 | -0.149 |
| 0.576  | 0.499  | 0.670  | 0.777  | -0.107 |
| -0.058 | 0.175  | -0.120 | -0.277 | 0.157  |
| 1.975  | 1.079  | 0.607  | 0.550  | 0.057  |
| 1.423  | 1.412  | -0.491 | 0.042  | -0.533 |
| 2.442  | 2.055  | 0.654  | 0.479  | 0.175  |

|        |        |        |        |        |
|--------|--------|--------|--------|--------|
| 0.608  | 1.104  | 0.567  | 0.042  | 0.525  |
| -0.791 | -0.292 | 0.197  | -0.011 | 0.208  |
| 1.462  | 0.747  | 0.388  | 0.696  | -0.309 |
| -2.065 | -1.016 | -0.544 | -0.636 | 0.092  |
| -1.178 | -0.744 | -0.300 | -0.439 | 0.138  |
| 0.937  | 0.862  | -0.938 | -0.528 | -0.410 |
| 0.129  | 0.108  | 0.243  | -0.185 | 0.429  |
| -0.482 | 0.067  | 0.213  | 0.170  | 0.043  |
| 1.542  | 0.890  | -0.180 | 0.109  | -0.289 |
| -0.209 | 0.093  | -0.064 | -0.037 | -0.027 |
| 1.593  | 1.600  | 0.148  | -0.837 | 0.985  |
| -0.242 | 0.026  | 0.215  | -0.137 | 0.352  |
| -0.606 | -0.179 | 1.000  | -0.084 | 1.084  |
| -0.093 | 0.442  | -0.444 | -0.240 | -0.204 |
| -1.092 | -0.979 | 0.319  | -0.243 | 0.563  |
| 1.906  | 1.728  | 0.209  | -0.104 | 0.313  |
| 1.340  | 1.873  | -0.223 | -0.017 | -0.207 |
| 0.181  | 0.341  | 0.281  | 0.149  | 0.132  |
| 0.919  | 0.658  | -0.057 | 0.161  | -0.218 |
| 0.120  | -0.153 | -0.132 | -0.179 | 0.047  |
| 1.728  | 2.718  | 0.217  | 0.359  | -0.143 |
| 2.559  | 2.296  | 0.237  | 0.240  | -0.003 |
| 2.579  | 1.741  | 0.180  | 0.612  | -0.432 |
| -0.231 | -0.177 | 0.207  | -0.332 | 0.539  |
| -0.530 | -0.502 | 0.141  | 0.500  | -0.359 |
| -0.474 | 0.279  | 0.147  | 0.554  | -0.407 |
| 1.918  | 1.520  | 0.382  | 0.221  | 0.162  |
| 0.298  | -0.358 | -0.509 | -0.087 | -0.422 |
| -0.033 | -0.139 | -0.060 | -0.204 | 0.144  |
| -2.317 | -2.696 | 0.266  | -0.353 | 0.619  |
| -0.019 | -1.076 | 0.068  | 0.005  | 0.062  |
| 0.949  | 0.116  | 0.270  | 0.110  | 0.161  |
| -0.106 | 0.076  | 0.750  | 0.367  | 0.383  |
| -2.197 | -1.745 | -0.239 | -1.070 | 0.831  |
| -0.552 | -1.038 | 0.227  | 0.125  | 0.102  |
| -2.138 | -1.716 | 0.443  | 0.102  | 0.341  |
| 2.191  | 2.180  | 0.367  | -0.540 | 0.907  |
| 0.279  | -0.762 | -0.412 | 0.508  | -0.920 |
| 1.176  | -0.633 | 0.258  | 0.264  | -0.006 |
| -0.638 | -1.849 | 0.772  | 0.260  | 0.512  |
| -1.414 | -1.969 | 0.145  | 0.003  | 0.142  |
| -3.456 | -2.775 | 0.230  | -0.336 | 0.567  |
| 0.726  | 0.639  | 0.098  | -0.188 | 0.286  |
| 0.782  | -0.407 | -0.295 | -0.645 | 0.350  |
| -2.327 | -1.915 | 0.038  | -0.575 | 0.613  |
| -0.651 | -1.464 | 0.144  | 0.666  | -0.523 |
| 1.611  | 0.340  | 0.378  | 0.442  | -0.065 |
| -0.686 | -1.448 | 0.581  | 0.285  | 0.295  |
| -0.254 | -0.596 | 0.802  | 0.731  | 0.071  |
| 0.840  | 0.956  | 0.105  | -0.448 | 0.553  |
| -0.706 | -0.422 | 0.076  | -0.357 | 0.434  |

|        |        |        |        |        |
|--------|--------|--------|--------|--------|
| 1.710  | 2.326  | -0.055 | -0.009 | -0.046 |
| 1.156  | 0.099  | 0.341  | 0.208  | 0.132  |
| -0.210 | -0.031 | 0.801  | 0.424  | 0.377  |
| 0.428  | -0.250 | 0.196  | 0.371  | -0.175 |
| 0.562  | 0.662  | -0.262 | -0.369 | 0.107  |
| -0.913 | -0.751 | -0.210 | -0.394 | 0.184  |
| 0.024  | 0.091  | 0.309  | -0.152 | 0.461  |
| -1.420 | -1.385 | -0.332 | 0.101  | -0.434 |
| -1.904 | -1.312 | -0.044 | -0.741 | 0.697  |
| -2.339 | -1.827 | -0.140 | 0.157  | -0.297 |
| -2.421 | -2.207 | 0.384  | 0.555  | -0.171 |
| -3.559 | -3.375 | -0.355 | -0.261 | -0.094 |
| 0.069  | -0.996 | -0.008 | -0.137 | 0.129  |
| 2.222  | 2.118  | 0.426  | -0.776 | 1.202  |
| -1.570 | -2.297 | -0.377 | -0.020 | -0.357 |
| 0.526  | 0.664  | 0.406  | -0.166 | 0.573  |
| -2.409 | -1.453 | 0.228  | -0.448 | 0.676  |
| -1.231 | -0.855 | -0.318 | -0.788 | 0.471  |
| -0.060 | 0.570  | -0.058 | -0.613 | 0.555  |
| 2.079  | 1.405  | -0.622 | 0.050  | -0.672 |
| 0.043  | 0.073  | -0.939 | -0.219 | -0.720 |
| 3.060  | 2.611  | 0.208  | -0.118 | 0.326  |
| 0.498  | -0.718 | -0.111 | 0.322  | -0.433 |
| -1.417 | -1.249 | -0.345 | -0.386 | 0.041  |
| 0.068  | 0.088  | 0.281  | -0.654 | 0.935  |
| -0.112 | -0.571 | -0.375 | -0.144 | -0.231 |
| -0.003 | -0.388 | 0.002  | -0.019 | 0.022  |
| 0.585  | -0.225 | -0.135 | -0.113 | -0.022 |
| -0.686 | -0.474 | 0.032  | -0.355 | 0.387  |
| 0.441  | 0.658  | 0.361  | -0.225 | 0.585  |
| 1.881  | 1.932  | 0.212  | -0.440 | 0.651  |
| 1.516  | 2.276  | 0.115  | -0.006 | 0.122  |
| 2.055  | 1.372  | 0.518  | 0.147  | 0.371  |
| 2.641  | 2.036  | 0.722  | -1.575 | 2.297  |
| -1.506 | -1.373 | -0.725 | -0.054 | -0.671 |
| 0.085  | -0.577 | 0.249  | 0.287  | -0.039 |
| -1.725 | -1.040 | 0.134  | 0.144  | -0.010 |
| 2.145  | 0.788  | 0.954  | 1.015  | -0.060 |
| -0.938 | -1.530 | 0.407  | -0.071 | 0.478  |
| -1.447 | -0.254 | 0.612  | 0.021  | 0.591  |
| 1.233  | 1.160  | 0.322  | 0.599  | -0.277 |
| -0.418 | -0.376 | -0.086 | 0.023  | -0.109 |
| -1.008 | -0.359 | -0.628 | -0.512 | -0.116 |
| -1.635 | -1.085 | 0.138  | -0.265 | 0.403  |
| 0.093  | 0.103  | 0.135  | 0.341  | -0.206 |
| -2.728 | -2.194 | 0.080  | -0.177 | 0.257  |
| -1.043 | -1.027 | 0.089  | -0.345 | 0.434  |
| 2.059  | 1.281  | 0.397  | 0.238  | 0.159  |
| -0.935 | -1.517 | -0.497 | -0.396 | -0.101 |
| -1.951 | -1.061 | -0.123 | -0.798 | 0.675  |
| -0.261 | -0.699 | 0.540  | 1.368  | -0.828 |

|        |        |        |        |        |
|--------|--------|--------|--------|--------|
| -2.317 | -1.721 | -0.478 | -0.733 | 0.255  |
| -2.654 | -1.978 | -0.964 | 0.542  | -1.506 |
| 2.534  | 1.871  | 0.525  | 0.076  | 0.449  |
| -1.864 | -2.277 | 0.278  | 0.301  | -0.023 |
| 1.934  | 2.230  | -0.061 | 0.051  | -0.112 |
| 1.637  | 0.677  | -0.298 | 0.476  | -0.775 |
| -0.611 | -1.643 | -0.287 | -0.028 | -0.259 |
| 0.071  | -0.828 | 0.266  | 0.502  | -0.236 |
| 0.917  | -0.019 | -0.065 | 0.273  | -0.337 |
| -1.823 | -1.003 | 0.071  | -0.059 | 0.129  |
| -1.426 | -0.833 | -0.272 | 0.278  | -0.551 |
| -0.554 | -0.860 | 0.488  | 0.284  | 0.204  |
| 1.064  | -0.338 | -0.062 | 0.168  | -0.230 |
| -0.317 | -0.844 | 0.110  | -0.187 | 0.297  |
| 0.227  | -1.024 | 0.089  | 0.152  | -0.063 |
| -0.213 | 0.209  | -0.297 | -0.571 | 0.273  |
| -2.522 | -2.149 | 0.136  | 0.315  | -0.179 |
| -1.110 | 0.862  | -0.027 | 0.002  | -0.029 |
| 0.090  | -0.568 | -0.117 | 0.155  | -0.272 |
| -2.073 | -1.396 | -0.738 | -0.138 | -0.600 |
| -2.127 | -1.401 | -0.510 | -0.212 | -0.298 |
| 1.488  | 1.264  | 0.054  | 0.442  | -0.388 |
| 0.069  | -0.062 | 0.317  | -0.085 | 0.402  |
| 0.244  | -0.342 | 0.143  | -0.332 | 0.475  |
| 0.398  | 0.287  | 0.187  | 0.016  | 0.171  |
| -0.073 | -0.568 | 0.231  | 0.331  | -0.100 |
| 0.905  | 0.336  | -0.019 | -0.339 | 0.320  |
| -0.540 | -0.123 | -0.124 | -0.198 | 0.074  |
| 1.599  | 1.018  | 0.243  | 0.784  | -0.542 |
| -2.398 | -2.563 | -0.008 | -0.084 | 0.076  |
| 1.800  | 1.385  | 0.371  | 0.120  | 0.251  |
| -0.108 | 0.045  | 0.293  | -0.550 | 0.843  |
| 0.266  | -0.362 | -0.081 | -0.036 | -0.045 |
| -1.983 | -1.287 | -0.021 | -0.817 | 0.796  |
| 2.246  | 1.476  | 0.256  | -0.097 | 0.353  |
| -0.288 | -0.466 | 0.105  | -0.145 | 0.249  |
| -0.974 | -0.506 | -0.557 | -0.258 | -0.299 |
| -0.873 | -0.997 | 0.042  | 0.053  | -0.011 |
| 1.133  | 0.281  | 0.420  | -0.016 | 0.436  |
| 0.116  | -0.458 | -0.097 | -0.309 | 0.212  |
| 0.973  | -0.038 | 0.062  | 0.288  | -0.226 |
| 3.051  | 2.473  | 0.000  | 0.159  | -0.159 |
| -2.339 | 1.258  | -0.450 | -0.432 | -0.018 |
| -2.777 | -0.552 | 0.254  | -1.070 | 1.324  |
| 1.799  | 1.102  | 0.265  | 0.736  | -0.471 |
| 2.135  | 1.476  | -0.407 | 0.026  | -0.432 |
| 0.417  | -0.777 | -0.555 | -0.386 | -0.170 |
| 0.930  | -0.560 | -0.305 | 0.199  | -0.504 |
| -2.259 | -1.600 | -0.565 | -0.197 | -0.368 |
| -2.221 | -1.503 | 0.171  | -0.279 | 0.451  |
| 2.002  | -0.115 | 0.387  | 0.352  | 0.035  |

|        |        |        |        |        |
|--------|--------|--------|--------|--------|
| -0.478 | -0.190 | -0.292 | 0.493  | -0.785 |
| 1.606  | 1.607  | 0.124  | -0.487 | 0.611  |
| -0.219 | -0.586 | -0.896 | 0.322  | -1.218 |
| -0.850 | -0.885 | -1.157 | -0.317 | -0.840 |
| 0.409  | 0.547  | -0.942 | -0.195 | -0.748 |
| 0.271  | 0.425  | 0.427  | -0.366 | 0.793  |
| 1.044  | 0.313  | -0.656 | 0.423  | -1.079 |
| 1.426  | 0.704  | -0.411 | 0.291  | -0.701 |
| 0.092  | -0.404 | 0.135  | 0.222  | -0.088 |
| -0.631 | -1.184 | 0.020  | 0.362  | -0.342 |
| -1.547 | -1.539 | -0.020 | 0.300  | -0.320 |
| -2.687 | -2.609 | -0.205 | -0.060 | -0.144 |
| -3.128 | -0.675 | -0.162 | -1.131 | 0.968  |
| -1.274 | -1.468 | 0.043  | 0.210  | -0.167 |
| -3.723 | -3.417 | -0.345 | 0.193  | -0.538 |
| -3.858 | -3.092 | -0.117 | 0.178  | -0.295 |
| -2.727 | -2.302 | -0.386 | -0.392 | 0.006  |
| -3.818 | -3.317 | 0.191  | -0.107 | 0.297  |
| -4.537 | -3.716 | -0.088 | -0.253 | 0.165  |
| -3.083 | -2.270 | 0.080  | -0.074 | 0.154  |
| -4.179 | -3.676 | 0.045  | -0.280 | 0.325  |
| -3.539 | -2.955 | -0.431 | -0.039 | -0.392 |
| -3.461 | -2.862 | -0.530 | 0.357  | -0.887 |
| -0.580 | -0.889 | 0.129  | -0.643 | 0.773  |
| -1.729 | -1.465 | 0.015  | -0.189 | 0.204  |
| -2.101 | -1.397 | 0.197  | 0.242  | -0.045 |
| -1.855 | -1.827 | -0.407 | -0.087 | -0.321 |
| -0.992 | -0.636 | 0.017  | 0.320  | -0.303 |
| 0.698  | -0.148 | -0.995 | -0.028 | -0.967 |
| -3.524 | -2.692 | -0.235 | -0.409 | 0.173  |
| -2.679 | -0.330 | -0.326 | -0.921 | 0.595  |
| -1.305 | -0.809 | 0.129  | -0.182 | 0.311  |
| 0.681  | 1.157  | 0.462  | 0.243  | 0.220  |
| -1.666 | -1.055 | 0.917  | 0.005  | 0.912  |
| 0.430  | -0.745 | 0.041  | -0.092 | 0.134  |
| 0.001  | -1.048 | 0.201  | 0.440  | -0.239 |
| -0.614 | -1.272 | 0.119  | 0.560  | -0.441 |
| -1.648 | -2.012 | -0.160 | -0.056 | -0.104 |
| -3.295 | -3.055 | -0.127 | 0.386  | -0.512 |
| -2.959 | -2.166 | 0.275  | -0.026 | 0.301  |
| -3.361 | -3.327 | 0.424  | 0.140  | 0.284  |
| -0.399 | -0.416 | 0.161  | 0.007  | 0.154  |
| 2.257  | 1.031  | -0.006 | 0.778  | -0.785 |
| 1.469  | 1.210  | -0.448 | 0.309  | -0.757 |
| 0.807  | 0.247  | 0.042  | 0.067  | -0.024 |
| -0.237 | 0.037  | -0.250 | -0.188 | -0.062 |
| 1.393  | 1.135  | -0.428 | -0.014 | -0.414 |
| -0.016 | -0.119 | 0.072  | -0.188 | 0.260  |
| -1.375 | -1.389 | 0.401  | -0.452 | 0.853  |
| -0.631 | -0.283 | 0.119  | -0.701 | 0.820  |
| -1.611 | -1.728 | 0.241  | 0.436  | -0.194 |



|        |        |        |        |        |
|--------|--------|--------|--------|--------|
| -3.542 | -3.033 | -0.156 | -0.780 | 0.623  |
| 1.897  | 0.559  | 0.379  | 0.452  | -0.072 |
| 0.355  | 0.243  | 0.427  | 0.116  | 0.310  |
| 1.201  | 0.780  | -0.143 | 0.631  | -0.774 |
| -0.334 | -0.075 | 0.165  | 1.106  | -0.940 |
| 0.975  | 0.708  | 0.412  | 0.414  | -0.002 |
| -0.721 | -0.855 | -0.078 | -0.321 | 0.243  |
| 1.061  | 1.657  | -0.957 | -0.106 | -0.851 |
| -1.183 | -0.528 | -0.008 | 0.411  | -0.419 |
| -2.500 | -0.409 | -0.257 | -0.309 | 0.053  |
| -1.205 | -1.478 | 0.124  | -0.314 | 0.438  |
| 1.097  | 0.752  | -0.156 | -0.276 | 0.120  |
| 0.241  | 0.421  | 0.412  | 0.124  | 0.288  |
| -0.619 | -0.528 | -0.205 | -0.017 | -0.187 |
| 0.484  | 0.727  | 0.029  | 0.100  | -0.071 |
| 1.811  | 1.811  | 0.334  | -0.268 | 0.603  |
| -1.028 | -1.405 | -0.075 | -0.024 | -0.051 |
| -3.196 | -2.715 | -0.433 | -0.244 | -0.189 |
| 0.538  | 0.267  | -0.022 | 0.210  | -0.232 |
| -2.272 | -1.600 | 0.148  | -0.580 | 0.729  |
| -1.863 | -1.518 | -0.357 | -0.382 | 0.025  |
| -1.336 | -1.089 | -0.462 | -0.460 | -0.002 |
| 2.600  | 0.832  | 0.486  | 0.102  | 0.385  |
| 0.431  | 0.622  | -0.977 | -0.965 | -0.013 |
| 1.280  | 2.572  | 0.074  | -0.199 | 0.273  |
| 1.384  | 1.190  | -0.569 | -0.585 | 0.016  |
| -1.282 | -1.378 | -0.908 | -0.840 | -0.068 |
| -1.436 | -0.217 | 0.531  | 0.199  | 0.332  |
| 0.960  | 0.356  | 0.687  | -0.184 | 0.871  |
| -0.853 | -1.134 | 0.201  | 0.072  | 0.130  |
| -2.422 | -2.494 | -0.561 | -0.003 | -0.558 |
| 0.801  | -0.133 | 0.381  | -0.106 | 0.487  |
| 2.020  | 2.212  | 0.036  | -0.714 | 0.750  |
| -0.960 | -0.184 | 0.388  | -0.214 | 0.601  |
| 1.397  | 1.818  | 0.632  | 0.250  | 0.382  |
| 3.715  | 2.723  | -0.347 | 0.181  | -0.529 |
| 1.367  | 1.798  | 0.155  | -0.083 | 0.238  |
| -0.093 | 0.050  | 0.107  | -0.858 | 0.965  |
| 0.418  | 0.584  | 0.063  | -0.098 | 0.161  |
| -0.220 | 0.227  | 0.144  | -0.749 | 0.894  |
| -0.734 | -0.238 | -0.567 | -0.533 | -0.035 |
| 0.326  | 1.088  | -0.091 | -0.222 | 0.131  |
| 0.593  | 0.606  | -0.128 | -0.438 | 0.310  |
| 0.437  | 0.616  | 0.251  | 0.074  | 0.177  |
| 1.008  | 0.754  | 0.267  | 0.193  | 0.074  |
| 1.003  | 1.486  | -0.391 | -0.653 | 0.262  |
| -2.100 | -1.736 | 0.242  | -0.149 | 0.391  |
| 0.542  | 0.353  | 1.375  | -0.094 | 1.469  |
| -1.794 | -1.364 | -0.358 | -0.429 | 0.071  |
| 0.405  | 0.814  | 0.302  | 0.329  | -0.027 |
| 1.306  | 1.291  | -1.018 | -0.685 | -0.334 |

|        |        |        |        |        |
|--------|--------|--------|--------|--------|
| 3.290  | 1.602  | -0.002 | 0.027  | -0.028 |
| -2.426 | -1.873 | 0.926  | -0.014 | 0.940  |
| -2.381 | -2.238 | 0.062  | -0.099 | 0.162  |
| -1.611 | -1.853 | -0.288 | -0.199 | -0.089 |
| 0.404  | 1.820  | -0.140 | -0.060 | -0.080 |
| 3.092  | 1.784  | 0.030  | 0.361  | -0.332 |
| 1.925  | 1.378  | 0.253  | -0.023 | 0.276  |
| -1.976 | -1.588 | -0.012 | -0.052 | 0.041  |
| 0.796  | 1.316  | -0.358 | -0.149 | -0.209 |
| 1.153  | 1.908  | 0.423  | 0.145  | 0.278  |
| 0.052  | 0.552  | 0.525  | -0.257 | 0.782  |
| -0.351 | 0.778  | 0.500  | 0.013  | 0.487  |
| 0.016  | 0.371  | 0.243  | -0.610 | 0.853  |
| -2.064 | -1.873 | 0.234  | 1.117  | -0.883 |
| 2.593  | 2.513  | 0.064  | -0.098 | 0.161  |
| -2.290 | -1.608 | 0.385  | -0.169 | 0.554  |
| -0.360 | 0.507  | -0.182 | -0.681 | 0.499  |
| -0.752 | 0.014  | -0.585 | -0.256 | -0.329 |
| 3.359  | 0.936  | -0.016 | -0.104 | 0.088  |
| -0.464 | 0.072  | 0.126  | 0.004  | 0.122  |
| 0.267  | 0.685  | 0.034  | -0.345 | 0.379  |
| -2.124 | -1.562 | 0.750  | -0.721 | 1.471  |
| 0.040  | 0.098  | 0.202  | 0.986  | -0.784 |
| -0.166 | 0.035  | 0.435  | 0.851  | -0.415 |
| -0.310 | 0.141  | -0.890 | -0.193 | -0.698 |
| -0.064 | -0.240 | 0.324  | 0.962  | -0.638 |
| -0.266 | -0.409 | 1.120  | 0.139  | 0.981  |
| -1.455 | -0.997 | 0.991  | 0.448  | 0.543  |
| 1.319  | 0.489  | 0.244  | 0.357  | -0.113 |
| 0.158  | -0.127 | 0.241  | 0.044  | 0.197  |
| -1.157 | -1.406 | 0.194  | 0.068  | 0.126  |
| -0.188 | -0.901 | 0.330  | 0.583  | -0.253 |
| 0.679  | 0.050  | 0.497  | 0.251  | 0.246  |
| 0.837  | -0.200 | -0.180 | 0.585  | -0.765 |
| -2.401 | -1.116 | 0.174  | -0.303 | 0.477  |
| -1.330 | -1.525 | 0.087  | 0.074  | 0.013  |
| -2.428 | -2.092 | -0.095 | 0.309  | -0.404 |
| 1.182  | 2.061  | 0.304  | 0.184  | 0.120  |
| 1.639  | 1.560  | 0.116  | -0.414 | 0.529  |
| -1.658 | -1.853 | 0.277  | 0.179  | 0.098  |
| -0.236 | -0.470 | -0.080 | 0.170  | -0.250 |
| -1.949 | -1.690 | 0.347  | -0.877 | 1.224  |
| 0.762  | -0.901 | -0.404 | 0.345  | -0.749 |
| -2.288 | -1.919 | -0.268 | -0.687 | 0.419  |
| -0.504 | -0.381 | 0.309  | 0.106  | 0.202  |
| -0.762 | -0.579 | -0.078 | -0.161 | 0.083  |
| -0.313 | -1.600 | 0.118  | -0.021 | 0.140  |
| -0.309 | 0.295  | 0.239  | -0.503 | 0.743  |
| 1.893  | 0.812  | 0.008  | -0.450 | 0.458  |
| 0.952  | 1.206  | 0.586  | -0.051 | 0.637  |
| 0.329  | 0.526  | 0.250  | -0.086 | 0.336  |

|        |        |        |        |        |
|--------|--------|--------|--------|--------|
| -2.389 | -2.084 | -0.638 | -1.106 | 0.468  |
| 1.410  | 1.267  | -0.094 | -0.201 | 0.107  |
| -1.075 | -0.807 | 0.471  | -0.370 | 0.841  |
| -2.588 | -0.955 | 0.461  | -0.606 | 1.067  |
| -0.442 | -0.479 | -0.312 | -0.025 | -0.287 |
| 1.903  | 2.213  | 0.186  | -0.215 | 0.401  |
| -0.211 | 0.366  | 0.172  | -0.324 | 0.497  |
| -2.922 | -2.367 | 0.028  | -0.619 | 0.647  |
| 1.448  | 2.320  | -0.028 | 0.298  | -0.325 |
| 0.788  | 2.081  | -0.310 | -0.068 | -0.242 |
| -0.939 | -1.532 | 0.567  | 1.122  | -0.555 |
| 1.616  | 1.478  | -0.278 | -0.079 | -0.199 |
| 0.803  | 1.831  | 0.090  | -0.004 | 0.093  |
| 0.583  | 0.977  | 0.285  | 0.159  | 0.126  |
| -0.695 | -0.546 | 0.061  | -0.635 | 0.696  |
| 0.282  | 0.800  | -0.406 | -0.121 | -0.286 |
| -1.514 | -1.353 | -0.197 | 0.388  | -0.585 |
| -0.617 | -0.809 | -0.145 | 0.770  | -0.915 |
| -0.027 | -0.458 | -0.444 | -0.170 | -0.273 |
| -2.587 | -2.724 | -0.709 | -0.131 | -0.578 |
| 0.574  | 0.971  | 0.067  | -0.629 | 0.696  |
| 1.363  | 1.110  | 0.085  | -0.323 | 0.408  |
| -1.104 | -0.834 | -0.010 | 0.280  | -0.290 |
| 2.153  | 2.206  | -0.002 | -0.036 | 0.035  |
| 0.825  | 1.027  | -0.624 | -0.676 | 0.051  |
| 1.561  | 0.453  | 0.275  | 0.532  | -0.257 |
| 1.784  | 1.543  | -0.036 | 0.095  | -0.130 |
| 0.696  | 0.598  | 0.070  | -0.243 | 0.314  |
| -1.337 | -1.265 | 0.171  | -0.666 | 0.837  |
| -2.096 | -1.518 | -0.232 | -0.496 | 0.264  |
| 0.626  | 0.988  | 0.517  | -0.120 | 0.637  |
| 2.380  | 1.476  | 0.436  | 0.383  | 0.053  |
| -1.306 | -1.215 | 0.049  | -0.462 | 0.511  |
| 2.315  | 0.974  | 0.192  | 0.747  | -0.555 |
| 0.618  | 0.936  | 0.404  | -0.131 | 0.535  |
| 1.555  | 0.740  | 0.732  | 0.728  | 0.005  |
| -0.521 | 0.218  | -0.390 | -0.588 | 0.198  |
| 0.631  | 0.359  | 0.504  | -0.390 | 0.894  |
| 0.824  | 1.533  | 0.451  | -0.281 | 0.732  |
| -1.579 | -1.040 | 0.480  | -0.378 | 0.857  |
| -3.095 | -2.309 | -0.095 | -1.022 | 0.927  |
| -0.682 | -1.940 | 0.582  | 0.637  | -0.054 |
| -0.917 | -0.401 | -0.378 | 0.158  | -0.536 |
| 1.690  | 1.056  | 0.653  | 0.363  | 0.290  |
| 2.675  | 2.819  | 1.390  | -0.017 | 1.406  |
| 1.749  | 1.427  | 0.067  | -0.176 | 0.243  |
| 1.854  | 1.066  | -0.384 | 0.070  | -0.455 |
| -0.311 | 0.398  | 0.419  | 0.917  | -0.498 |
| -1.262 | -0.961 | 0.306  | -0.166 | 0.472  |
| -0.538 | -1.089 | -0.071 | -0.268 | 0.198  |
| -1.583 | -1.500 | -0.116 | 0.503  | -0.618 |

|        |        |        |        |        |
|--------|--------|--------|--------|--------|
| -1.376 | -1.988 | -0.184 | -0.296 | 0.112  |
| -0.960 | -0.732 | -0.895 | -0.380 | -0.514 |
| -0.257 | 0.224  | -0.360 | 0.556  | -0.916 |
| 1.611  | 1.670  | -0.063 | -0.493 | 0.430  |
| 0.581  | 1.048  | 0.424  | -0.881 | 1.305  |
| -3.688 | -3.415 | -0.148 | -0.291 | 0.143  |
| -2.059 | -1.097 | -0.055 | -0.076 | 0.021  |
| 1.416  | 0.819  | 0.453  | 0.383  | 0.070  |
| 0.367  | 0.191  | 0.324  | -0.043 | 0.366  |
| -0.649 | -0.462 | 0.140  | -0.171 | 0.311  |
| -2.310 | -2.454 | 0.123  | 0.265  | -0.142 |
| 0.224  | 0.752  | 0.428  | 0.641  | -0.214 |
| 0.746  | 0.039  | 0.284  | 0.781  | -0.497 |
| 0.186  | -0.564 | -0.337 | -0.004 | -0.332 |
| -0.046 | 0.152  | 0.117  | -0.036 | 0.152  |
| 0.228  | -0.178 | 0.530  | 0.694  | -0.164 |
| -0.140 | -0.387 | 0.682  | 0.875  | -0.193 |
| 1.286  | 1.175  | 0.752  | 1.212  | -0.460 |
| 1.274  | 1.648  | 0.055  | -0.134 | 0.189  |
| 0.031  | 0.482  | -0.135 | -0.038 | -0.097 |
| 0.111  | 0.295  | 0.017  | -0.258 | 0.275  |
| -1.338 | 0.176  | -0.345 | -0.682 | 0.337  |
| -1.899 | -2.060 | 0.123  | 0.589  | -0.466 |
| -1.064 | -0.657 | 0.328  | 0.394  | -0.066 |
| -0.706 | -0.177 | 0.174  | -0.289 | 0.463  |
| -1.948 | -1.560 | -0.266 | 0.293  | -0.558 |
| 0.777  | 1.341  | -0.136 | 0.100  | -0.236 |
| 0.925  | 0.783  | 0.203  | -0.246 | 0.449  |
| -2.728 | -0.523 | -0.526 | -0.134 | -0.392 |
| 1.644  | 1.518  | 0.357  | -0.188 | 0.544  |
| 0.529  | -0.311 | 0.708  | 0.821  | -0.113 |
| -2.604 | -2.656 | 0.097  | 0.468  | -0.371 |
| -2.178 | -2.042 | 0.234  | -0.100 | 0.333  |
| -2.681 | -2.072 | -0.028 | -0.296 | 0.268  |
| -1.842 | -2.000 | 0.063  | 0.250  | -0.187 |
| -0.172 | -1.499 | 0.048  | -0.177 | 0.225  |
| -2.651 | -2.799 | -0.204 | -0.731 | 0.526  |
| -2.923 | -2.653 | -0.428 | -0.297 | -0.131 |
| 0.905  | 1.734  | 0.087  | 0.156  | -0.069 |
| 0.818  | 1.578  | 0.279  | 0.475  | -0.195 |
| -0.366 | 0.279  | 0.023  | -0.464 | 0.488  |
| 0.931  | 0.299  | 0.788  | 0.238  | 0.550  |
| 0.301  | 0.026  | -0.395 | 0.255  | -0.650 |
| 0.577  | 0.566  | 0.427  | -0.267 | 0.694  |
| -3.233 | -2.563 | -0.423 | -0.952 | 0.529  |
| -3.690 | -2.881 | -0.137 | -0.447 | 0.310  |
| 1.351  | 0.563  | 0.153  | 0.743  | -0.590 |
| -0.434 | -1.411 | -0.034 | -0.089 | 0.055  |
| -1.257 | -1.725 | 0.398  | 0.546  | -0.148 |
| -1.442 | -0.740 | -0.035 | -0.593 | 0.558  |
| 3.585  | 2.152  | -0.118 | 0.084  | -0.202 |

|        |        |        |        |        |
|--------|--------|--------|--------|--------|
| 1.880  | 3.133  | 0.364  | 0.611  | -0.247 |
| 2.271  | 1.432  | 0.756  | 0.370  | 0.386  |
| 1.158  | 0.998  | 0.631  | 0.821  | -0.190 |
| 2.426  | 1.828  | -0.120 | -0.089 | -0.032 |
| -2.454 | -1.906 | 0.268  | 0.848  | -0.580 |
| -2.289 | -2.646 | 0.173  | 0.363  | -0.190 |
| 1.160  | 1.485  | -0.155 | -0.198 | 0.042  |
| -2.246 | -2.239 | -0.036 | -0.868 | 0.832  |
| 2.096  | 2.723  | 0.236  | 0.849  | -0.613 |
| 1.769  | 1.575  | 0.339  | 0.240  | 0.100  |
| 1.619  | 1.574  | 0.061  | 0.396  | -0.335 |
| 1.921  | 1.691  | 0.711  | 0.649  | 0.062  |
| 0.863  | 0.778  | 0.027  | -0.079 | 0.105  |
| 0.377  | -0.388 | 0.214  | 0.692  | -0.478 |
| -1.296 | -1.666 | 0.073  | -0.342 | 0.415  |
| 0.922  | 0.983  | 0.221  | -0.059 | 0.281  |
| -1.444 | -1.108 | 0.601  | -0.378 | 0.979  |
| 1.121  | 2.160  | 0.386  | 0.025  | 0.361  |
| 0.830  | -0.669 | -0.773 | -0.118 | -0.654 |
| -1.710 | -1.803 | -0.043 | -0.488 | 0.445  |
| 1.598  | 2.097  | 0.864  | -0.299 | 1.163  |
| -0.223 | -0.469 | 0.339  | 0.529  | -0.191 |
| 1.134  | 0.858  | 0.057  | 0.373  | -0.316 |
| -3.013 | -2.666 | 0.136  | -0.783 | 0.919  |
| 0.565  | -0.157 | 0.667  | 0.486  | 0.181  |
| 0.893  | 1.619  | -0.357 | -0.241 | -0.116 |
| -1.367 | -1.589 | 0.675  | -0.521 | 1.196  |
| -1.798 | -1.593 | 0.304  | -0.306 | 0.610  |
| 1.312  | 1.265  | 0.018  | -0.340 | 0.358  |
| -1.332 | -1.314 | -0.132 | 0.404  | -0.536 |
| -0.928 | -0.611 | 0.069  | 0.194  | -0.125 |
| 2.505  | 1.953  | 0.152  | 0.033  | 0.119  |
| -2.824 | -2.264 | -0.053 | 0.031  | -0.085 |
| -3.943 | -3.600 | -0.273 | -0.316 | 0.043  |
| -1.502 | -1.068 | 0.025  | -0.722 | 0.747  |
| 1.387  | 1.926  | -1.069 | -0.812 | -0.257 |
| 1.251  | 1.504  | 0.209  | 0.250  | -0.041 |
| -3.377 | -2.940 | 0.320  | -0.656 | 0.976  |
| 1.357  | 0.562  | 0.094  | 0.139  | -0.044 |
| -1.642 | -1.309 | 0.508  | -0.037 | 0.545  |
| -0.737 | -0.130 | 0.142  | -0.281 | 0.423  |
| -0.261 | -1.361 | -0.405 | 0.007  | -0.412 |
| 1.039  | 0.249  | 0.409  | 0.118  | 0.291  |
| -1.958 | -1.895 | -0.029 | 0.342  | -0.371 |
| 0.874  | 1.165  | 0.683  | 0.516  | 0.166  |
| -2.150 | -1.084 | 0.062  | -0.420 | 0.481  |
| 1.059  | 1.922  | 0.025  | -0.241 | 0.266  |
| 1.107  | 0.690  | 0.044  | -0.657 | 0.701  |
| -1.664 | -2.018 | -0.087 | 0.032  | -0.119 |
| -2.076 | -1.516 | 0.005  | 0.068  | -0.063 |
| -1.847 | -1.090 | -0.340 | -0.141 | -0.199 |

|        |        |        |        |        |
|--------|--------|--------|--------|--------|
| 2.018  | 0.721  | -0.109 | 0.050  | -0.159 |
| 0.413  | 0.967  | 0.547  | -0.586 | 1.133  |
| -1.931 | -1.230 | -0.098 | -0.530 | 0.432  |
| -2.183 | -1.309 | 0.100  | -0.214 | 0.314  |
| 1.739  | 1.035  | -0.074 | 0.171  | -0.245 |
| 0.596  | -0.395 | -0.045 | -0.013 | -0.032 |
| -1.636 | -2.646 | -0.094 | 0.235  | -0.329 |
| 0.717  | 1.166  | 0.153  | 0.249  | -0.095 |
| 1.017  | 1.368  | 0.276  | 0.429  | -0.152 |
| 0.081  | -1.100 | 0.087  | 0.282  | -0.195 |
| 1.638  | 1.822  | 0.186  | 0.151  | 0.035  |
| -0.092 | 0.569  | 0.473  | -0.415 | 0.888  |
| -2.662 | -2.596 | -0.061 | -0.300 | 0.239  |
| 1.648  | 0.834  | -0.165 | -0.314 | 0.149  |
| 1.029  | 0.367  | -0.026 | -0.224 | 0.198  |
| 0.667  | 0.569  | 0.501  | 0.264  | 0.237  |
| -0.286 | 0.117  | 0.176  | -0.535 | 0.711  |
| -3.975 | -3.440 | 0.288  | -0.604 | 0.891  |
| 1.329  | 1.272  | 0.605  | -0.373 | 0.978  |
| 3.520  | 2.175  | 0.240  | -0.132 | 0.372  |
| -1.460 | -1.154 | -0.167 | -0.738 | 0.571  |
| -1.685 | -2.076 | 0.287  | -0.159 | 0.446  |
| 0.562  | 0.720  | 0.796  | -0.507 | 1.303  |
| -2.646 | -1.936 | -0.037 | -0.758 | 0.721  |
| 1.308  | 0.875  | 0.071  | 0.120  | -0.049 |
| 1.780  | 1.580  | 0.584  | 0.390  | 0.194  |
| 0.375  | 0.432  | 1.253  | -0.083 | 1.336  |
| 1.994  | 0.918  | -0.094 | 0.028  | -0.122 |
| 2.744  | 2.691  | 0.500  | -0.168 | 0.668  |
| -1.134 | -1.516 | 0.062  | -0.021 | 0.083  |
| 1.364  | 0.696  | 0.337  | -0.072 | 0.409  |
| -0.077 | -0.156 | -0.362 | -0.447 | 0.085  |
| 2.928  | 1.558  | -0.020 | -0.075 | 0.055  |
| 0.398  | 0.213  | 0.569  | -0.133 | 0.701  |
| 0.237  | 0.021  | 0.180  | -0.477 | 0.657  |
| -2.747 | -2.207 | -0.082 | 0.206  | -0.287 |
| 2.155  | 2.396  | 0.109  | -0.107 | 0.216  |
| -3.576 | -3.061 | -0.576 | -0.989 | 0.413  |
| 1.895  | 1.510  | -0.429 | -0.031 | -0.398 |
| 1.099  | 1.520  | 1.293  | 0.670  | 0.623  |
| -0.329 | 0.137  | 0.153  | -0.649 | 0.802  |
| 0.926  | 1.180  | 0.557  | -0.253 | 0.810  |
| -0.116 | 0.123  | 0.146  | -0.152 | 0.299  |
| 1.859  | 0.913  | -0.087 | 0.075  | -0.162 |
| 2.558  | 3.273  | -0.067 | -0.240 | 0.173  |
| -0.940 | -0.635 | -0.436 | -0.117 | -0.319 |
| 0.253  | -0.123 | -0.072 | -0.242 | 0.170  |
| 1.737  | 1.539  | 0.057  | 0.098  | -0.042 |
| 1.735  | 1.755  | 0.178  | -0.009 | 0.187  |
| -0.519 | 0.149  | 0.326  | 0.280  | 0.046  |
| 0.005  | -0.068 | 0.705  | -0.116 | 0.821  |

|        |        |        |        |        |
|--------|--------|--------|--------|--------|
| -0.523 | 0.667  | 0.702  | -0.826 | 1.528  |
| -2.339 | -1.773 | 0.399  | -1.161 | 1.560  |
| 0.449  | 0.776  | 0.305  | -0.276 | 0.582  |
| -1.472 | -1.104 | -0.165 | -0.514 | 0.349  |
| 0.626  | 1.003  | 1.212  | 0.303  | 0.909  |
| -1.284 | 0.464  | -0.185 | -0.141 | -0.044 |
| -1.179 | -0.254 | -0.781 | -0.921 | 0.140  |
| -1.164 | -0.473 | 0.276  | -0.840 | 1.116  |
| -0.053 | -0.552 | 0.316  | -0.235 | 0.551  |
| -0.582 | 0.038  | 0.200  | -0.359 | 0.558  |
| 1.199  | 1.257  | -0.384 | -0.780 | 0.396  |
| 2.409  | 1.340  | 0.125  | -0.233 | 0.359  |
| 0.655  | 1.268  | -0.163 | -0.969 | 0.807  |
| -0.165 | -0.130 | 0.305  | -0.436 | 0.741  |
| 0.559  | 0.799  | -0.111 | 0.163  | -0.274 |
| 1.425  | 1.677  | 0.709  | 0.228  | 0.481  |
| 2.083  | 2.169  | -0.374 | -0.451 | 0.077  |
| -0.694 | -0.044 | -0.001 | -0.712 | 0.711  |
| 0.114  | 0.769  | -0.152 | -0.275 | 0.123  |
| -1.066 | -0.888 | -0.427 | -0.596 | 0.169  |
| -0.052 | -0.129 | 0.667  | 0.031  | 0.636  |
| 1.518  | 1.285  | 0.267  | -0.744 | 1.012  |
| 1.420  | 1.743  | 0.223  | 0.231  | -0.008 |
| 0.837  | 0.910  | 0.214  | -0.086 | 0.300  |
| -0.670 | 0.066  | 0.023  | -0.614 | 0.637  |
| 0.184  | 0.953  | -0.786 | -0.625 | -0.161 |
| 1.642  | 1.812  | -0.155 | -0.312 | 0.156  |
| 2.015  | 2.316  | 0.188  | -0.262 | 0.450  |
| 0.185  | 0.252  | 0.251  | 0.056  | 0.195  |
| 0.922  | 1.584  | 0.516  | -0.243 | 0.759  |
| -0.851 | -1.253 | 0.348  | -0.117 | 0.465  |
| -1.429 | -0.989 | 0.174  | -0.556 | 0.730  |
| 1.689  | 1.326  | -0.081 | 0.099  | -0.179 |
| -1.860 | -1.670 | -0.155 | -0.539 | 0.384  |
| 0.305  | 0.329  | 0.214  | 0.134  | 0.080  |
| -2.725 | -2.080 | 0.250  | 0.020  | 0.230  |
| 0.812  | 1.351  | 0.315  | -0.728 | 1.042  |
| 1.341  | 1.896  | 0.173  | -0.185 | 0.358  |
| 0.775  | 1.984  | 1.308  | 0.169  | 1.140  |
| -0.638 | -0.739 | 0.537  | -0.398 | 0.935  |
| 1.456  | 0.518  | 0.168  | 0.073  | 0.095  |
| 1.457  | 0.648  | -0.301 | 0.000  | -0.302 |
| -0.291 | -0.393 | 0.739  | -1.417 | 2.156  |
| -1.001 | -0.783 | -0.107 | -0.315 | 0.208  |
| -2.310 | -1.728 | 0.048  | -0.060 | 0.108  |
| 0.519  | 0.793  | -1.316 | -0.288 | -1.028 |
| -0.747 | 0.225  | 0.119  | -0.966 | 1.085  |
| -0.162 | 0.364  | -0.052 | 0.004  | -0.056 |
| 0.244  | 0.977  | 0.448  | -0.936 | 1.384  |
| 2.012  | 1.829  | 1.198  | -0.493 | 1.692  |
| -0.123 | -0.063 | 0.354  | -0.129 | 0.483  |

|        |        |        |        |        |
|--------|--------|--------|--------|--------|
| -1.064 | -0.477 | -0.132 | -0.900 | 0.768  |
| 1.595  | 2.532  | 0.376  | 0.103  | 0.273  |
| 0.173  | 0.413  | 0.489  | -0.318 | 0.808  |
| 0.898  | 1.288  | -0.407 | -0.661 | 0.254  |
| 0.974  | 1.059  | 0.124  | -0.823 | 0.947  |
| -2.259 | -1.718 | 0.198  | -0.466 | 0.664  |
| -0.903 | 0.096  | 0.170  | -0.367 | 0.538  |
| -1.372 | -0.953 | 0.400  | -0.726 | 1.126  |
| 0.082  | 0.476  | -0.195 | 0.058  | -0.253 |
| -0.352 | 0.322  | -0.306 | -0.129 | -0.177 |
| -3.127 | -2.565 | -0.184 | -0.636 | 0.452  |
| -2.132 | -1.320 | -0.025 | -0.785 | 0.760  |
| -1.870 | -0.535 | -0.351 | -0.154 | -0.197 |
| -2.227 | -3.192 | 0.690  | 0.582  | 0.108  |
| 2.067  | 1.125  | 0.863  | 0.586  | 0.277  |
| 2.562  | 2.328  | 0.504  | 0.537  | -0.032 |
| -2.550 | -2.450 | 0.065  | -0.188 | 0.253  |
| -1.376 | -0.305 | 0.459  | -1.171 | 1.630  |
| 0.243  | 0.890  | -0.041 | 0.208  | -0.249 |
| -0.665 | 0.013  | 0.877  | 0.823  | 0.054  |
| 1.643  | 1.567  | 0.240  | 0.141  | 0.099  |
| 1.425  | 1.417  | 0.406  | 0.980  | -0.574 |
| 0.593  | 0.162  | 0.193  | -0.196 | 0.389  |
| -0.780 | -1.448 | 0.218  | 0.417  | -0.200 |
| 0.993  | 1.128  | 0.230  | 0.061  | 0.169  |
| -2.545 | -2.230 | -0.056 | -1.390 | 1.334  |
| -0.101 | 0.034  | 0.392  | -0.487 | 0.878  |
| -2.580 | -2.503 | -0.663 | -0.197 | -0.467 |
| -1.825 | -1.075 | -0.291 | -1.597 | 1.306  |
| 0.895  | 1.035  | 0.538  | 0.252  | 0.286  |
| -0.894 | -0.490 | -0.886 | -0.390 | -0.496 |
| 0.307  | 0.986  | 0.309  | -0.759 | 1.068  |
| 1.263  | 0.924  | -0.758 | -0.249 | -0.509 |
| -0.398 | -0.191 | -0.570 | -0.485 | -0.086 |
| 2.015  | 2.470  | 0.285  | -0.458 | 0.742  |
| 1.548  | 1.839  | 0.375  | 0.546  | -0.171 |
| 0.383  | 1.422  | 0.091  | -0.732 | 0.824  |
| -0.776 | -1.263 | 0.194  | -0.022 | 0.215  |
| -2.087 | -1.758 | 0.476  | -0.498 | 0.973  |
| -1.163 | -0.636 | -0.214 | -0.758 | 0.544  |
| -0.649 | -0.869 | 0.196  | -0.157 | 0.353  |
| 0.970  | 1.351  | 0.818  | -0.559 | 1.377  |
| 0.363  | 0.010  | 0.154  | -0.546 | 0.699  |
| -1.840 | -1.693 | -0.700 | -0.297 | -0.403 |
| 0.297  | 0.656  | -0.658 | -1.342 | 0.684  |
| -1.227 | -1.094 | 0.499  | 0.101  | 0.399  |
| 3.165  | 2.517  | 0.206  | -0.291 | 0.497  |
| -1.257 | -0.800 | 0.194  | 0.008  | 0.186  |
| -0.192 | 0.430  | 0.223  | -0.872 | 1.095  |
| 1.531  | 0.512  | 0.485  | 0.614  | -0.130 |
| 1.171  | 1.485  | 0.449  | -0.266 | 0.715  |



|        |        |        |        |        |
|--------|--------|--------|--------|--------|
| 0.596  | 0.602  | 0.040  | -0.068 | 0.107  |
| 0.558  | 0.948  | 0.490  | -0.421 | 0.910  |
| 1.041  | 1.310  | 0.756  | -0.198 | 0.953  |
| -2.554 | -1.951 | -0.224 | -0.414 | 0.190  |
| -0.272 | -0.071 | -0.716 | -0.183 | -0.533 |
| 2.283  | 2.172  | 0.029  | -0.084 | 0.113  |
| -1.964 | -1.623 | -0.006 | -0.052 | 0.046  |
| 1.665  | 1.515  | 0.383  | 0.033  | 0.349  |
| 3.035  | 1.909  | 0.051  | -0.081 | 0.132  |
| -1.818 | -0.994 | 0.982  | 0.269  | 0.713  |
| 0.859  | 0.984  | 0.130  | -0.895 | 1.026  |
| -0.040 | 0.451  | 0.474  | -0.241 | 0.715  |
| -0.856 | -0.107 | 0.184  | 0.153  | 0.032  |
| 1.209  | 1.228  | -0.169 | -0.287 | 0.118  |
| -3.391 | -2.724 | 0.539  | 0.058  | 0.481  |
| 0.754  | -0.290 | -0.032 | 0.346  | -0.378 |
| 0.450  | 0.834  | -1.395 | -1.110 | -0.285 |
| -1.497 | -1.104 | -0.230 | -0.325 | 0.095  |
| -0.526 | -0.385 | -0.096 | -0.115 | 0.019  |
| 1.460  | 1.688  | -0.119 | 0.053  | -0.172 |
| -2.266 | -1.796 | 0.609  | -0.202 | 0.811  |
| 0.351  | 0.531  | 0.388  | -0.439 | 0.828  |
| 0.311  | 0.748  | -0.033 | -0.828 | 0.795  |
| -1.015 | -0.669 | 0.178  | -0.304 | 0.482  |
| 1.027  | 0.994  | 0.307  | 0.471  | -0.164 |
| 0.230  | 0.291  | 0.538  | -0.070 | 0.608  |
| -1.393 | -1.136 | -0.172 | -0.819 | 0.647  |
| -0.148 | 0.249  | -0.119 | -0.274 | 0.155  |
| 2.424  | 1.779  | 0.333  | -0.043 | 0.375  |
| 0.796  | 0.234  | 0.450  | -0.088 | 0.538  |
| 2.547  | 1.952  | 0.497  | 0.267  | 0.230  |
| -0.276 | -1.146 | 0.527  | -0.307 | 0.834  |
| 0.045  | -0.810 | 0.453  | -0.177 | 0.630  |
| 0.480  | 0.185  | 0.409  | 0.587  | -0.178 |
| 0.725  | 0.800  | 0.179  | -0.469 | 0.648  |
| 2.212  | 1.381  | 0.467  | 0.162  | 0.305  |
| -0.322 | 0.423  | 0.699  | 0.098  | 0.601  |
| -1.651 | -0.816 | 0.450  | -0.034 | 0.485  |
| -0.777 | -1.012 | 0.733  | -0.197 | 0.930  |
| 3.094  | 2.590  | -0.799 | -0.046 | -0.753 |
| -0.239 | 0.160  | 0.803  | 1.080  | -0.277 |
| 1.647  | 0.957  | 0.473  | 0.282  | 0.191  |
| -0.008 | 0.525  | 0.355  | -0.126 | 0.481  |
| -0.285 | 0.175  | 0.151  | -0.128 | 0.279  |
| -0.885 | -1.712 | 0.046  | 0.056  | -0.009 |
| -2.756 | -2.465 | 0.068  | -0.162 | 0.230  |
| -1.432 | -1.037 | 0.309  | 0.118  | 0.192  |
| 2.865  | 1.882  | 1.231  | 0.091  | 1.140  |
| -0.884 | -0.941 | -0.152 | -0.372 | 0.220  |
| 3.240  | 2.106  | 0.243  | 0.311  | -0.068 |
| -0.119 | -0.386 | -0.536 | -0.752 | 0.216  |

|        |        |        |        |        |
|--------|--------|--------|--------|--------|
| -0.906 | -0.664 | -0.069 | -0.306 | 0.237  |
| -3.320 | -2.422 | -0.039 | -1.394 | 1.355  |
| -0.300 | -0.205 | 0.310  | 0.770  | -0.460 |
| -2.376 | -1.856 | 0.072  | 0.143  | -0.071 |
| 1.242  | 0.468  | 0.680  | 0.769  | -0.089 |
| -1.791 | -1.814 | 0.468  | 0.355  | 0.113  |
| 0.333  | -0.330 | 0.233  | 0.370  | -0.136 |
| -0.539 | -0.467 | 0.233  | -0.015 | 0.248  |
| 0.157  | 0.187  | -0.064 | -0.105 | 0.041  |
| -0.133 | -0.592 | 0.003  | -0.045 | 0.048  |
| -0.881 | -1.720 | -0.741 | -0.682 | -0.059 |
| -3.505 | -1.118 | -0.321 | -2.234 | 1.913  |
| 2.508  | 2.047  | 0.722  | -0.646 | 1.368  |
| 0.291  | -0.395 | -0.031 | 0.065  | -0.096 |
| 1.681  | 1.578  | 0.523  | 0.432  | 0.091  |
| -0.483 | -1.195 | 0.518  | 0.037  | 0.481  |
| 2.223  | 0.973  | -0.003 | 0.366  | -0.368 |
| 0.891  | 1.869  | -0.645 | -0.360 | -0.286 |
| 2.881  | 2.114  | 0.117  | -0.462 | 0.579  |
| 2.293  | 1.457  | 0.019  | -0.336 | 0.356  |
| 0.360  | -0.394 | 0.112  | 0.124  | -0.012 |
| 1.051  | 0.235  | 0.622  | 0.519  | 0.103  |
| 1.391  | 0.760  | 0.839  | 0.095  | 0.744  |
| 0.441  | -0.174 | 0.056  | -0.054 | 0.110  |
| 0.430  | 0.553  | 1.320  | 0.820  | 0.500  |
| -1.217 | -1.661 | -0.790 | -0.505 | -0.284 |
| 3.349  | 2.128  | 0.168  | -0.135 | 0.303  |
| 0.924  | 1.170  | 0.028  | -0.419 | 0.446  |
| 0.488  | 0.394  | 0.789  | -0.172 | 0.960  |
| -2.376 | -2.023 | 0.373  | -0.260 | 0.632  |
| -0.181 | 0.455  | 0.318  | 0.064  | 0.254  |
| -3.325 | -2.742 | -0.256 | -0.898 | 0.643  |
| 2.003  | 1.203  | 0.055  | -0.374 | 0.429  |
| -1.240 | -0.751 | -0.146 | -0.269 | 0.124  |
| -1.510 | -0.731 | 0.119  | -0.821 | 0.940  |
| -1.021 | -1.105 | -0.422 | -0.587 | 0.165  |
| 0.818  | 1.394  | 0.435  | 0.289  | 0.146  |
| 0.253  | -0.804 | 0.388  | -0.043 | 0.431  |
| -0.230 | -0.034 | 1.035  | 0.310  | 0.725  |
| -1.609 | -1.366 | 0.675  | -0.422 | 1.098  |
| -0.646 | -0.541 | 0.174  | -0.606 | 0.780  |
| 2.149  | 1.345  | 0.093  | 0.089  | 0.004  |
| 1.352  | 1.713  | 0.088  | -0.177 | 0.265  |
| -2.226 | -1.810 | 0.030  | -0.702 | 0.732  |
| -2.277 | -1.581 | 0.039  | -1.047 | 1.086  |
| 1.103  | 0.432  | 0.207  | -0.216 | 0.422  |
| -0.461 | -0.732 | 0.032  | -0.468 | 0.500  |
| 1.725  | 1.078  | 0.143  | -0.018 | 0.162  |
| 1.032  | 1.111  | -0.195 | 0.041  | -0.236 |
| -1.324 | -1.243 | 1.275  | -0.089 | 1.364  |
| -0.771 | -0.302 | 0.225  | -0.071 | 0.295  |

|        |        |        |        |        |
|--------|--------|--------|--------|--------|
| 0.806  | 0.934  | -0.573 | -0.554 | -0.019 |
| -0.644 | 0.020  | 0.287  | -0.770 | 1.057  |
| 0.961  | 0.917  | 0.203  | -0.010 | 0.213  |
| 0.948  | 1.119  | 0.491  | -0.593 | 1.084  |
| -1.680 | -1.252 | 0.241  | -0.130 | 0.371  |
| 1.826  | 1.986  | 0.135  | -0.404 | 0.540  |
| -2.686 | -2.121 | 0.395  | -0.120 | 0.515  |
| -2.637 | -2.098 | 0.225  | -1.041 | 1.266  |
| -0.705 | -0.784 | -0.238 | 0.010  | -0.248 |
| -1.889 | -2.066 | -0.027 | -0.162 | 0.134  |
| 0.117  | -0.629 | 0.425  | 0.359  | 0.066  |
| 2.275  | 2.290  | -1.156 | -1.021 | -0.135 |
| -0.489 | -0.197 | -0.152 | -0.520 | 0.369  |
| 1.383  | 1.690  | 0.239  | -0.020 | 0.259  |
| -2.493 | -2.589 | -0.392 | 0.289  | -0.680 |
| -0.487 | -0.110 | 0.581  | -0.752 | 1.333  |
| 0.403  | 0.374  | 0.120  | -0.395 | 0.515  |
| -0.313 | 0.069  | 0.203  | -0.281 | 0.484  |
| -0.989 | -0.975 | 2.176  | 0.501  | 1.675  |
| -1.916 | -1.589 | 0.164  | 0.088  | 0.076  |
| -3.217 | -1.664 | 0.076  | -0.509 | 0.584  |
| 1.170  | 1.255  | 0.356  | 0.144  | 0.212  |
| -2.796 | -2.279 | 0.091  | -0.902 | 0.994  |
| 0.120  | 0.878  | 1.500  | -0.122 | 1.622  |
| 0.734  | 0.870  | 0.144  | -0.353 | 0.496  |
| 0.952  | 1.678  | -0.013 | -0.663 | 0.649  |
| -0.867 | -0.578 | 0.243  | -0.467 | 0.710  |
| 1.188  | -0.278 | 0.538  | 0.211  | 0.327  |
| 1.923  | 0.562  | 0.633  | 0.195  | 0.439  |
| 1.664  | 2.283  | 0.578  | 0.018  | 0.560  |
| 0.429  | -0.863 | 0.386  | 0.048  | 0.338  |
| -1.891 | -1.521 | 0.240  | 0.236  | 0.004  |
| -1.189 | -1.147 | 0.135  | -0.190 | 0.325  |
| -0.564 | 0.025  | -0.102 | -0.207 | 0.105  |
| -2.556 | -2.400 | 0.059  | -1.181 | 1.240  |
| -1.049 | -0.421 | 0.245  | -0.558 | 0.804  |
| 1.615  | 1.632  | -0.444 | -0.727 | 0.283  |
| -2.777 | -1.530 | 0.136  | -0.106 | 0.242  |
| -0.228 | -0.663 | -1.122 | -0.592 | -0.530 |
| -0.271 | 0.305  | -0.964 | -0.042 | -0.923 |
| 0.973  | -0.358 | -0.117 | 0.006  | -0.123 |
| -0.402 | -0.657 | 0.511  | -0.026 | 0.537  |
| -0.401 | -0.105 | -0.244 | -0.098 | -0.146 |
| 1.257  | 1.344  | -0.691 | -0.487 | -0.204 |
| 1.293  | 1.687  | 0.487  | -0.165 | 0.652  |
| -0.021 | 0.120  | 0.688  | 0.243  | 0.445  |
| 0.023  | -0.040 | 0.607  | -0.181 | 0.788  |
| 1.879  | 1.373  | 0.142  | 0.545  | -0.403 |
| 1.722  | 0.031  | -0.453 | 0.360  | -0.813 |
| 0.182  | -0.018 | -0.459 | -0.330 | -0.128 |
| 0.409  | 0.964  | 0.746  | -0.195 | 0.941  |

|        |        |        |        |        |
|--------|--------|--------|--------|--------|
| -3.068 | -2.926 | 0.141  | 0.892  | -0.751 |
| 0.154  | 0.253  | 0.094  | 0.295  | -0.201 |
| -1.216 | -1.664 | -0.853 | 0.097  | -0.950 |
| -1.367 | -0.654 | -0.765 | -0.203 | -0.562 |
| -1.193 | -1.250 | -0.632 | -0.199 | -0.433 |
| -2.532 | -2.770 | 0.125  | 0.140  | -0.015 |
| -2.097 | -1.961 | -0.327 | 0.437  | -0.764 |
| -1.974 | -2.543 | 0.178  | -0.037 | 0.214  |
| -1.780 | -1.775 | 0.123  | 0.033  | 0.090  |
| -2.432 | -1.664 | 0.276  | -0.203 | 0.479  |
| 0.228  | 0.376  | -0.011 | -0.004 | -0.007 |
| -0.790 | -0.421 | -0.465 | -0.388 | -0.077 |
| 0.031  | -0.258 | -0.398 | 0.166  | -0.564 |
| -2.412 | -2.053 | 0.566  | -0.366 | 0.932  |
| 0.771  | 0.547  | 0.358  | -0.184 | 0.543  |
| 1.447  | 1.295  | 0.418  | -0.129 | 0.547  |
| -0.526 | -0.060 | 0.035  | -0.481 | 0.516  |
| 1.334  | 0.365  | -0.064 | 0.127  | -0.191 |
| 2.058  | 2.017  | -0.089 | -0.670 | 0.581  |
| 0.502  | 0.508  | -0.409 | -0.450 | 0.041  |
| -1.245 | -1.282 | 0.200  | -0.295 | 0.496  |
| 0.489  | 0.467  | 0.508  | -0.509 | 1.017  |
| 2.272  | 1.714  | 0.157  | 0.088  | 0.069  |
| 1.578  | 0.798  | 0.486  | 0.542  | -0.056 |
| -0.292 | 0.504  | 0.316  | -0.493 | 0.809  |
| -1.376 | -0.951 | 0.280  | -0.079 | 0.359  |
| -2.293 | -0.941 | -0.197 | -0.843 | 0.647  |
| 2.762  | 1.431  | 0.624  | 0.771  | -0.147 |
| 2.120  | 2.306  | 0.439  | 0.073  | 0.366  |
| -1.344 | -1.584 | 0.013  | 0.558  | -0.545 |
| -1.284 | -1.598 | -0.014 | 0.508  | -0.522 |
| -0.467 | -1.672 | -0.047 | 0.457  | -0.504 |
| -2.506 | -1.777 | -0.560 | -0.622 | 0.062  |
| -0.790 | -0.334 | -0.307 | -0.604 | 0.297  |
| -1.251 | -0.587 | -0.355 | -0.232 | -0.123 |
| 0.518  | 0.023  | 0.275  | 0.091  | 0.184  |
| 0.926  | -0.013 | 0.456  | 0.176  | 0.280  |
| -3.799 | -2.499 | -0.081 | -0.633 | 0.552  |
| 0.526  | -0.540 | 0.175  | 0.385  | -0.210 |
| 0.888  | 0.334  | 0.145  | -0.173 | 0.318  |
| -0.938 | -1.854 | -0.623 | 0.339  | -0.962 |
| -2.898 | -3.091 | 0.058  | -0.161 | 0.218  |
| -2.103 | 0.357  | -0.500 | -1.042 | 0.542  |
| -1.520 | -1.004 | 0.346  | -0.152 | 0.498  |
| 1.000  | 0.681  | 0.441  | -0.078 | 0.520  |
| -0.263 | -0.024 | 0.174  | -0.173 | 0.347  |
| 1.992  | 2.103  | 0.159  | -0.344 | 0.502  |
| -1.987 | -1.142 | -0.688 | -0.663 | -0.025 |
| -0.931 | -0.822 | 0.542  | -0.050 | 0.592  |
| -1.544 | -1.265 | 0.044  | -0.324 | 0.368  |
| -0.400 | -0.159 | 0.232  | 0.163  | 0.069  |

|        |        |        |        |        |
|--------|--------|--------|--------|--------|
| -1.718 | -2.681 | -0.055 | 0.687  | -0.742 |
| 0.625  | -0.060 | -0.058 | 0.872  | -0.930 |
| 0.246  | -0.162 | 0.185  | 0.129  | 0.055  |
| 0.493  | 1.075  | 0.232  | 0.038  | 0.194  |
| -0.241 | 0.293  | -0.820 | -0.384 | -0.437 |
| -0.469 | -1.051 | 0.275  | 0.078  | 0.197  |
| -1.366 | -1.809 | 0.445  | 0.173  | 0.272  |
| -0.787 | -0.896 | 0.326  | 0.157  | 0.170  |
| 0.836  | 0.550  | -0.433 | 0.110  | -0.543 |
| 1.000  | 0.812  | 0.532  | 0.358  | 0.174  |
| 0.579  | 0.690  | 0.262  | 0.484  | -0.223 |
| 0.353  | 0.305  | -0.139 | -0.609 | 0.469  |
| -1.928 | -2.220 | -0.158 | -0.133 | -0.025 |
| -0.854 | -1.088 | 0.082  | 0.055  | 0.027  |
| 0.606  | 0.700  | -0.289 | -0.281 | -0.008 |
| -0.312 | -1.112 | -1.739 | -1.574 | -0.165 |
| 1.431  | 1.365  | 0.298  | 1.684  | -1.386 |
| -1.914 | -2.451 | -0.442 | -0.327 | -0.114 |
| 0.563  | 0.295  | -0.126 | 0.158  | -0.284 |
| 1.289  | 1.039  | 0.698  | 0.625  | 0.073  |
| 0.734  | 0.925  | -0.366 | -0.019 | -0.347 |
| -0.564 | -0.310 | 0.448  | -0.063 | 0.511  |
| -0.038 | 0.586  | 0.501  | -0.176 | 0.676  |
| -1.363 | -1.707 | 0.220  | -0.250 | 0.471  |
| -1.084 | -0.648 | -0.035 | -0.057 | 0.022  |
| -2.010 | -2.079 | 1.925  | 0.582  | 1.343  |
| -1.783 | -1.705 | -0.295 | 0.458  | -0.752 |
| 1.810  | 2.226  | -0.150 | 0.010  | -0.160 |
| -2.963 | -3.331 | 0.010  | 0.860  | -0.851 |
| 1.955  | 2.333  | 0.262  | -0.579 | 0.841  |
| 0.028  | -0.540 | -0.502 | -0.159 | -0.343 |
| -0.016 | 0.067  | 0.059  | -0.211 | 0.270  |
| -0.452 | -0.099 | 1.218  | 0.203  | 1.016  |
| 0.559  | 1.606  | 0.557  | 0.427  | 0.130  |
| -1.069 | -0.177 | 0.315  | -0.163 | 0.478  |
| -1.402 | -0.625 | -1.301 | -0.456 | -0.845 |
| -0.183 | 0.118  | 0.250  | 0.135  | 0.115  |
| -0.244 | -0.702 | 0.219  | 0.736  | -0.517 |
| -1.940 | -1.680 | 0.672  | 0.752  | -0.081 |
| -1.250 | -1.200 | -0.064 | -0.632 | 0.569  |
| -1.568 | -1.888 | 0.477  | 0.169  | 0.308  |
| -2.421 | -1.940 | -0.126 | -0.242 | 0.116  |
| -0.028 | 0.419  | 0.895  | -0.309 | 1.205  |
| -3.606 | -2.712 | 0.973  | -0.034 | 1.007  |
| -1.632 | -0.536 | 0.304  | -0.777 | 1.081  |
| -1.955 | -2.190 | -0.014 | -0.336 | 0.322  |
| 0.330  | -0.240 | 0.311  | -0.037 | 0.348  |
| -2.209 | -1.730 | -0.632 | 0.841  | -1.473 |
| -0.449 | -0.381 | 0.605  | 0.097  | 0.508  |
| -1.410 | -1.349 | 0.226  | -0.193 | 0.419  |
| 0.362  | -0.594 | -0.842 | -0.247 | -0.594 |

|        |        |        |        |        |
|--------|--------|--------|--------|--------|
| -2.700 | -1.932 | -0.261 | -0.510 | 0.249  |
| -0.860 | -0.202 | 0.144  | -0.232 | 0.376  |
| -3.251 | -2.200 | -0.299 | -0.582 | 0.283  |
| -0.803 | -0.973 | 0.129  | 0.052  | 0.077  |
| 2.491  | 1.419  | -0.129 | 0.057  | -0.186 |
| 2.057  | 2.203  | 0.416  | -0.197 | 0.613  |
| 0.112  | 0.468  | 0.289  | -0.513 | 0.802  |
| 0.538  | -0.580 | 0.133  | 0.147  | -0.014 |
| 0.899  | 0.517  | 0.398  | -0.405 | 0.803  |
| -0.472 | 1.141  | -0.627 | -0.341 | -0.286 |
| -0.408 | -1.365 | 0.387  | 0.322  | 0.064  |
| 1.567  | 0.960  | 0.427  | 0.631  | -0.204 |
| -1.347 | -0.641 | -0.421 | -0.200 | -0.221 |
| -1.693 | -1.081 | 0.733  | -0.219 | 0.952  |
| -1.988 | -1.488 | 0.615  | -0.565 | 1.180  |
| 0.728  | 0.598  | 0.567  | -0.132 | 0.700  |
| -1.908 | -1.675 | 0.451  | 0.668  | -0.217 |
| -1.977 | -1.464 | -0.306 | -0.320 | 0.014  |
| 0.830  | 0.321  | 0.571  | -0.082 | 0.653  |
| -1.531 | -1.211 | 0.308  | -0.351 | 0.659  |
| -1.143 | -1.658 | -0.323 | 0.184  | -0.507 |
| -0.838 | -1.055 | -0.070 | -0.187 | 0.118  |
| -2.062 | -1.196 | 0.295  | -0.449 | 0.744  |
| -2.965 | -1.748 | 0.920  | 0.061  | 0.859  |
| -1.183 | -0.868 | 0.444  | 0.194  | 0.251  |
| -1.267 | -1.607 | 0.291  | 0.105  | 0.185  |
| -0.954 | -1.049 | 0.001  | 0.146  | -0.145 |
| -0.332 | -1.119 | -0.003 | -0.087 | 0.084  |
| 0.516  | 0.878  | 0.530  | 0.001  | 0.529  |
| -2.767 | -2.256 | -0.577 | -0.079 | -0.497 |
| 1.480  | 1.913  | 0.916  | -0.515 | 1.431  |
| -0.240 | 0.193  | 1.161  | 0.555  | 0.606  |
| -3.917 | -3.717 | -0.296 | 0.346  | -0.642 |
| -2.549 | -2.119 | 0.256  | 0.198  | 0.059  |
| 1.032  | 0.009  | -0.563 | -0.319 | -0.244 |
| -1.148 | -0.665 | 0.080  | 0.210  | -0.130 |
| -0.476 | -0.791 | 0.288  | 0.339  | -0.051 |
| -1.112 | -0.740 | 1.218  | 0.278  | 0.940  |
| 2.449  | 2.779  | -0.047 | -0.335 | 0.288  |
| -2.295 | -2.696 | 0.444  | 0.761  | -0.317 |
| -0.110 | 0.000  | 0.403  | 0.443  | -0.040 |
| 0.564  | 0.473  | 0.335  | 0.929  | -0.593 |
| -1.036 | -1.059 | 0.232  | 0.523  | -0.291 |
| -2.485 | -2.182 | 0.273  | 0.252  | 0.021  |
| 0.011  | 0.958  | -0.079 | -1.796 | 1.717  |
| 0.128  | 0.283  | 0.147  | -0.147 | 0.293  |
| -1.303 | -0.605 | -0.799 | -0.250 | -0.549 |
| -0.054 | -0.156 | 0.209  | 0.443  | -0.234 |
| -2.829 | -1.441 | -0.017 | -0.124 | 0.107  |
| -2.661 | -2.555 | -0.419 | -0.448 | 0.029  |
| -1.197 | -1.106 | 0.316  | 0.000  | 0.316  |

|        |        |        |        |        |
|--------|--------|--------|--------|--------|
| -1.736 | -2.304 | 0.071  | 0.670  | -0.599 |
| -0.165 | 1.580  | -0.257 | -0.224 | -0.034 |
| 0.385  | 0.140  | 0.009  | 0.289  | -0.280 |
| -2.348 | -1.765 | -0.398 | -0.483 | 0.085  |
| -0.799 | 0.043  | 0.198  | 0.039  | 0.158  |
| -1.631 | -2.103 | 0.047  | 0.075  | -0.028 |
| -0.996 | -0.651 | 0.634  | 0.181  | 0.453  |
| -1.571 | -1.168 | 0.510  | 0.431  | 0.079  |
| 0.544  | 1.237  | 0.457  | -0.460 | 0.917  |
| -1.554 | -2.325 | -0.310 | 0.107  | -0.417 |
| -0.585 | -0.662 | 0.249  | -0.171 | 0.420  |
| -1.718 | -1.599 | 0.379  | -0.410 | 0.789  |
| -1.234 | -1.612 | 0.059  | -0.099 | 0.157  |
| -3.467 | -4.085 | -0.110 | -0.250 | 0.141  |
| -0.170 | -0.412 | -1.528 | -0.678 | -0.850 |
| -2.540 | -2.188 | -0.095 | 0.275  | -0.370 |
| -0.159 | -0.511 | 0.074  | -0.420 | 0.494  |
| -0.805 | 0.194  | 0.448  | -0.012 | 0.460  |
| -0.155 | -1.635 | 0.436  | 0.572  | -0.136 |
| 0.848  | 1.417  | 0.125  | -0.184 | 0.309  |
| -0.384 | -1.171 | 0.698  | -0.005 | 0.702  |
| -0.574 | -0.889 | 0.444  | 0.156  | 0.288  |
| -2.174 | -2.460 | 0.176  | -0.239 | 0.415  |
| -1.321 | -1.319 | 0.115  | -0.145 | 0.260  |
| 1.784  | 2.201  | -0.094 | 0.261  | -0.355 |
| -3.355 | -1.608 | -0.440 | -0.452 | 0.012  |
| 1.000  | 0.293  | 0.327  | -0.316 | 0.643  |
| 0.073  | 0.107  | 0.400  | 0.125  | 0.275  |
| 0.887  | 1.749  | 0.023  | -0.518 | 0.541  |
| 2.878  | 1.333  | 0.484  | 0.508  | -0.024 |
| 2.054  | 0.922  | 0.143  | 0.517  | -0.374 |
| -0.235 | -0.191 | -0.248 | -0.495 | 0.247  |
| 0.487  | -0.109 | -0.113 | 0.356  | -0.469 |
| 2.689  | 2.202  | 0.284  | -0.522 | 0.806  |
| -1.875 | -1.168 | 0.131  | -0.504 | 0.635  |
| -1.570 | -1.971 | 0.220  | 0.300  | -0.080 |
| -0.954 | -0.675 | 0.133  | 0.143  | -0.010 |
| -0.246 | -0.742 | 0.057  | -0.031 | 0.088  |
| -0.966 | -1.039 | 0.350  | 0.380  | -0.030 |
| -1.002 | -1.513 | 0.227  | 0.526  | -0.298 |
| -0.679 | -1.018 | 0.348  | -0.162 | 0.511  |
| -0.791 | -1.034 | 0.368  | -0.388 | 0.757  |
| -1.588 | -1.456 | -0.114 | 0.147  | -0.260 |
| -0.859 | -1.277 | 0.270  | 0.392  | -0.122 |
| -1.353 | -1.315 | 0.258  | 0.059  | 0.199  |
| -1.204 | -1.157 | 0.359  | 0.154  | 0.205  |
| -2.276 | -1.210 | -0.442 | -0.945 | 0.503  |
| -0.845 | -1.993 | 0.041  | -0.348 | 0.389  |
| 1.810  | 1.486  | 0.195  | 0.616  | -0.422 |
| -0.815 | -0.461 | -0.545 | 0.129  | -0.674 |
| -1.218 | -1.700 | -0.325 | 0.032  | -0.356 |

|        |        |        |        |        |
|--------|--------|--------|--------|--------|
| 0.248  | 0.592  | 0.058  | 0.188  | -0.130 |
| -0.808 | -0.255 | -0.213 | -1.045 | 0.832  |
| -0.890 | -1.272 | -0.573 | -0.237 | -0.336 |
| -0.191 | -1.143 | -0.130 | 0.475  | -0.604 |
| -1.101 | -1.609 | 0.019  | -0.110 | 0.128  |
| -1.691 | -1.926 | -1.445 | -0.578 | -0.867 |
| -0.419 | -0.586 | -0.124 | 0.364  | -0.488 |
| 0.979  | 0.775  | -0.584 | 0.073  | -0.657 |
| -3.681 | -2.253 | -0.257 | -0.127 | -0.130 |
| -2.635 | -1.147 | -0.294 | -0.827 | 0.533  |
| -1.373 | -0.914 | -0.718 | -0.461 | -0.257 |
| 2.163  | 1.990  | -0.841 | -0.109 | -0.731 |
| -2.765 | -2.157 | -0.225 | -0.371 | 0.147  |
| 0.357  | 0.489  | 0.199  | 0.209  | -0.010 |
| -2.477 | -2.033 | -0.632 | 0.292  | -0.924 |
| 1.212  | 2.118  | 0.322  | 0.071  | 0.252  |
| -2.642 | -1.474 | -0.756 | -0.829 | 0.072  |
| -0.521 | -0.220 | 0.756  | 0.092  | 0.665  |
| 0.518  | 0.450  | 0.372  | 0.005  | 0.367  |
| -1.613 | -1.744 | -0.054 | -0.464 | 0.410  |
| 0.305  | 0.271  | -0.062 | -0.079 | 0.017  |
| -1.666 | -0.855 | -0.085 | -0.336 | 0.251  |
| 0.056  | -0.625 | 0.090  | -0.012 | 0.102  |
| 0.993  | 0.653  | 0.491  | 0.173  | 0.318  |
| -1.117 | -0.073 | -0.065 | -0.363 | 0.298  |
| -1.002 | -1.129 | 0.572  | -0.154 | 0.727  |
| -1.670 | -1.276 | 0.116  | -0.178 | 0.293  |
| 0.299  | -1.074 | -0.133 | 0.585  | -0.718 |
| 0.196  | 0.808  | -0.044 | -0.395 | 0.350  |
| -2.334 | -1.177 | -0.351 | 0.272  | -0.623 |
| -0.863 | -1.834 | 0.269  | 0.075  | 0.193  |
| -0.144 | -1.432 | 0.170  | 0.432  | -0.262 |
| -2.531 | -2.799 | -0.103 | 0.718  | -0.821 |
| 0.386  | 0.115  | 0.269  | 0.374  | -0.105 |
| -0.065 | 0.435  | 0.146  | -0.384 | 0.530  |
| -0.474 | 0.613  | -0.375 | -0.629 | 0.254  |
| 1.806  | 2.385  | 0.718  | -0.033 | 0.751  |
| 2.892  | 2.431  | 0.018  | 0.651  | -0.633 |
| 1.525  | 1.993  | 0.106  | -0.128 | 0.234  |
| 0.176  | -0.370 | 0.281  | -0.099 | 0.381  |
| 0.142  | -0.831 | 0.270  | -0.087 | 0.357  |
| -1.408 | -1.197 | 0.215  | -0.132 | 0.347  |
| -0.888 | -1.262 | 0.505  | 0.727  | -0.222 |
| -0.949 | -1.402 | -0.091 | 0.160  | -0.251 |
| 0.629  | -0.288 | 0.085  | 0.424  | -0.339 |
| -0.536 | -1.853 | 0.000  | -0.121 | 0.121  |
| 1.301  | 0.204  | 0.181  | 0.391  | -0.210 |
| -1.669 | -1.396 | 0.074  | -0.417 | 0.491  |
| 1.700  | 1.636  | -0.927 | -0.884 | -0.044 |
| 0.911  | 0.942  | -1.113 | -0.772 | -0.341 |
| -0.810 | -1.306 | -0.506 | -0.277 | -0.229 |



|        |        |        |        |        |
|--------|--------|--------|--------|--------|
| -0.683 | -1.169 | -0.079 | -0.456 | 0.376  |
| -1.683 | -1.432 | -0.040 | 0.103  | -0.143 |
| 0.918  | 0.543  | 0.081  | 0.747  | -0.666 |
| -0.785 | -0.493 | 0.106  | -0.240 | 0.347  |
| -2.049 | -1.483 | 0.077  | -0.531 | 0.607  |
| -2.288 | -2.877 | 0.293  | -0.208 | 0.501  |
| -0.139 | 0.406  | 0.652  | -0.443 | 1.095  |
| -2.397 | -0.021 | 0.282  | -0.201 | 0.482  |
| 1.671  | 1.288  | 0.321  | 0.504  | -0.183 |
| 2.546  | 1.892  | 0.423  | 0.398  | 0.025  |
| -1.726 | -0.961 | -0.372 | -0.755 | 0.383  |
| 1.669  | 0.424  | 0.571  | -0.091 | 0.662  |
| -0.534 | 0.213  | -0.297 | -1.073 | 0.776  |
| 0.916  | 0.336  | -1.074 | -0.230 | -0.843 |
| -0.008 | -0.353 | -0.403 | -0.391 | -0.012 |
| -0.235 | -0.155 | 0.582  | -0.127 | 0.709  |
| -2.865 | -2.296 | -0.283 | 0.016  | -0.299 |
| -2.391 | -1.857 | 0.157  | -0.466 | 0.624  |
| -1.773 | -1.674 | -0.026 | -0.925 | 0.899  |
| -2.521 | -2.178 | 0.082  | -0.512 | 0.595  |
| -1.390 | -1.081 | -0.063 | 0.310  | -0.373 |
| 0.063  | 0.730  | 0.465  | 0.354  | 0.110  |
| -1.521 | -1.003 | -0.063 | 0.280  | -0.343 |
| 1.273  | -0.275 | -0.297 | 0.236  | -0.533 |
| -2.054 | -2.073 | -0.071 | -0.189 | 0.119  |
| 0.100  | -0.951 | -0.285 | -0.134 | -0.151 |
| 0.878  | 1.278  | 0.148  | -0.103 | 0.251  |
| -1.032 | -1.873 | -0.262 | -0.087 | -0.175 |
| 1.086  | 0.521  | 0.206  | -0.392 | 0.598  |
| -2.515 | -2.254 | 0.748  | -0.326 | 1.075  |
| 0.870  | 0.427  | -0.446 | -0.556 | 0.109  |
| -1.590 | -1.032 | 0.427  | -1.369 | 1.796  |
| -3.258 | -2.689 | -0.350 | -1.574 | 1.224  |
| 2.042  | 1.515  | -0.249 | -0.093 | -0.156 |
| -3.040 | -2.515 | 0.052  | 0.777  | -0.725 |
| 2.062  | 1.780  | 0.205  | 0.087  | 0.118  |
| 1.512  | 1.895  | 0.206  | -0.735 | 0.941  |
| -0.387 | 0.054  | 0.936  | -0.114 | 1.051  |
| -2.352 | -2.351 | -0.512 | -0.353 | -0.159 |
| 1.173  | 0.920  | 0.233  | 0.499  | -0.266 |
| 2.203  | 1.966  | 0.054  | -0.347 | 0.401  |
| 0.391  | 0.815  | -0.315 | -0.362 | 0.047  |
| 0.127  | -0.299 | -0.202 | 0.052  | -0.254 |
| -1.057 | 0.665  | 0.014  | -0.833 | 0.847  |
| 1.573  | 0.723  | 0.338  | 0.610  | -0.272 |
| 1.985  | 1.795  | -0.059 | -0.148 | 0.089  |
| 2.096  | 1.306  | 0.366  | 0.047  | 0.318  |
| 1.920  | 1.965  | 0.006  | -0.650 | 0.657  |
| 1.353  | 2.028  | 0.027  | -1.291 | 1.318  |
| 1.096  | 2.081  | 0.823  | -0.910 | 1.733  |
| 1.791  | 1.288  | 0.246  | -0.179 | 0.426  |

|        |        |        |        |        |
|--------|--------|--------|--------|--------|
| 1.490  | 1.017  | 0.434  | 0.699  | -0.266 |
| -0.842 | -0.494 | 0.123  | -0.356 | 0.479  |
| 1.483  | 1.511  | -0.861 | 0.148  | -1.009 |
| -0.054 | -0.546 | -0.094 | -0.403 | 0.309  |
| 2.349  | 2.302  | 0.211  | 0.236  | -0.025 |
| 1.446  | 1.668  | 0.097  | 0.471  | -0.374 |
| 1.353  | 1.285  | 0.183  | 0.137  | 0.046  |
| 0.026  | -0.195 | 0.286  | -0.735 | 1.021  |
| 1.298  | 2.124  | -0.159 | -0.511 | 0.352  |
| 2.271  | 2.449  | -0.856 | -0.383 | -0.473 |
| -1.162 | -1.265 | 0.295  | 0.744  | -0.449 |
| -1.399 | -1.077 | 0.559  | 1.038  | -0.479 |
| -0.451 | -0.034 | 0.347  | 0.780  | -0.433 |
| -3.181 | -3.293 | -0.191 | -0.357 | 0.166  |
| 1.692  | 0.758  | 0.360  | 0.471  | -0.112 |
| 0.398  | -0.071 | 0.074  | 0.162  | -0.088 |
| -1.376 | -2.404 | 0.112  | -0.048 | 0.160  |
| 2.257  | 1.629  | 0.136  | -0.131 | 0.268  |
| -2.001 | -1.683 | 0.155  | -0.453 | 0.608  |
| -1.666 | -1.910 | 0.095  | -0.234 | 0.330  |
| 1.380  | 1.334  | 0.268  | 0.146  | 0.121  |
| 0.394  | -0.163 | 0.397  | 0.065  | 0.332  |
| -1.597 | -2.465 | 0.317  | 0.056  | 0.261  |
| -2.126 | -1.933 | -0.161 | 0.088  | -0.249 |
| -1.096 | -0.370 | 0.428  | -0.267 | 0.695  |
| -2.604 | -1.694 | -0.349 | -0.481 | 0.132  |
| -0.119 | 0.128  | -0.013 | 0.011  | -0.023 |
| -0.932 | -0.675 | 1.038  | 0.492  | 0.547  |
| 0.968  | 0.257  | 0.476  | 0.141  | 0.335  |
| -0.687 | -0.154 | 0.397  | 0.249  | 0.147  |
| -0.944 | -1.062 | 1.309  | 0.729  | 0.580  |
| 0.384  | 0.353  | 0.657  | 0.097  | 0.559  |
| -0.498 | -0.071 | 0.588  | 0.257  | 0.331  |
| 1.446  | 0.563  | -0.068 | 0.797  | -0.865 |
| 1.472  | 0.438  | 0.176  | 1.592  | -1.416 |
| 0.135  | 0.111  | 0.975  | 0.376  | 0.599  |
| 2.461  | 0.422  | 0.476  | 0.042  | 0.435  |
| -0.267 | 0.863  | 0.219  | 0.226  | -0.007 |
| -1.347 | -0.851 | 0.792  | 0.623  | 0.170  |
| 1.042  | 0.327  | 0.534  | 0.805  | -0.271 |
| 0.000  | -0.761 | -0.271 | -0.315 | 0.043  |
| -0.234 | -0.904 | 0.067  | -0.047 | 0.114  |
| -1.638 | -1.975 | 0.234  | 0.289  | -0.054 |
| -1.890 | -2.579 | 0.099  | 0.370  | -0.271 |
| -0.788 | -1.347 | 0.494  | 0.120  | 0.374  |
| -1.758 | -1.430 | 0.348  | 0.227  | 0.121  |
| 1.103  | 0.940  | -0.831 | -0.226 | -0.606 |
| -1.750 | -2.305 | 0.442  | 0.011  | 0.432  |
| 1.048  | 0.959  | 0.081  | -0.257 | 0.339  |
| 0.924  | 0.130  | 0.093  | -0.014 | 0.107  |
| 0.366  | -0.188 | 0.396  | 0.277  | 0.119  |

|        |        |        |        |        |
|--------|--------|--------|--------|--------|
| 0.126  | 0.186  | 0.004  | -0.018 | 0.022  |
| -1.371 | -1.216 | 1.056  | 0.424  | 0.632  |
| -1.306 | -1.467 | 0.332  | -0.059 | 0.392  |
| 1.927  | 0.531  | 0.539  | 0.515  | 0.024  |
| -0.287 | -1.195 | -0.500 | 0.080  | -0.579 |
| -1.375 | -0.657 | 0.075  | -0.151 | 0.226  |
| 0.649  | 0.448  | -0.598 | -0.359 | -0.239 |
| -1.797 | -1.726 | -0.909 | -0.716 | -0.193 |
| -0.280 | 0.044  | 0.256  | -0.316 | 0.572  |
| -0.811 | -0.517 | -0.107 | -0.473 | 0.366  |
| 0.326  | -0.994 | -0.501 | 0.347  | -0.848 |
| 0.532  | 1.206  | -0.164 | -0.079 | -0.085 |
| -0.655 | -0.365 | 1.436  | 0.370  | 1.067  |
| -2.711 | -2.824 | -0.014 | -0.025 | 0.012  |
| -2.584 | -2.109 | -0.425 | -1.163 | 0.739  |
| -3.917 | -2.644 | 0.098  | 0.291  | -0.192 |
| -2.490 | -1.988 | -1.079 | -0.185 | -0.894 |
| -1.284 | -1.954 | -1.044 | -0.877 | -0.166 |
| 0.461  | 0.397  | 0.256  | 0.174  | 0.082  |
| -2.815 | -2.909 | -1.375 | -0.640 | -0.734 |
| 1.770  | 0.827  | 0.554  | 0.195  | 0.358  |
| 1.283  | 0.871  | 0.814  | 0.139  | 0.675  |
| 2.415  | 2.489  | -0.535 | -1.091 | 0.557  |
| -0.407 | -0.790 | 0.128  | 0.173  | -0.046 |
| 0.900  | 1.545  | 0.227  | 0.223  | 0.004  |
| -0.251 | 0.025  | 0.770  | -0.146 | 0.916  |
| 1.933  | 1.769  | 0.043  | 0.252  | -0.209 |
| -0.118 | 0.291  | 0.395  | -0.254 | 0.650  |
| -4.499 | -1.795 | -0.497 | -1.316 | 0.819  |
| -3.968 | -3.862 | -0.021 | 0.148  | -0.169 |
| -1.270 | -1.860 | 0.021  | 0.360  | -0.339 |
| 0.303  | 0.300  | -0.216 | 0.366  | -0.582 |
| -2.799 | -2.351 | 0.512  | -0.779 | 1.292  |
| -2.099 | -1.695 | -0.249 | 0.038  | -0.287 |
| -1.299 | -1.234 | 0.118  | -0.381 | 0.499  |
| -0.248 | 0.298  | -0.433 | -0.304 | -0.129 |
| -0.225 | -0.746 | 0.308  | 0.635  | -0.327 |
| -1.063 | -1.574 | 0.068  | 0.055  | 0.013  |
| -0.446 | -0.192 | 0.146  | 0.352  | -0.206 |
| -1.224 | -0.049 | -0.099 | 0.357  | -0.456 |
| 0.154  | 0.340  | 0.438  | 1.086  | -0.647 |
| 1.704  | 1.095  | 0.232  | 0.495  | -0.263 |
| 1.587  | 1.257  | -0.002 | 0.272  | -0.274 |
| 1.191  | 1.119  | 0.138  | 0.640  | -0.503 |
| 1.347  | 0.877  | 0.216  | 0.729  | -0.513 |
| 1.992  | 2.117  | 0.084  | -0.361 | 0.445  |
| -0.908 | -1.478 | -0.126 | -0.105 | -0.021 |
| -1.359 | -1.302 | -0.086 | -0.527 | 0.442  |
| 0.048  | 1.921  | -0.018 | -0.142 | 0.124  |
| -0.424 | -0.864 | 0.320  | -0.428 | 0.749  |
| -1.346 | -0.717 | -0.358 | -0.621 | 0.263  |

|        |        |        |        |        |
|--------|--------|--------|--------|--------|
| 0.316  | 0.863  | 0.086  | -0.227 | 0.314  |
| 0.816  | -0.535 | 0.328  | 0.319  | 0.010  |
| 2.694  | 1.446  | -0.590 | 0.286  | -0.877 |
| -0.561 | -0.228 | -0.017 | -0.395 | 0.378  |
| 1.916  | 1.799  | -0.461 | -0.660 | 0.199  |
| -2.499 | -1.682 | -0.142 | -0.488 | 0.347  |
| -2.202 | -2.743 | -0.081 | 0.189  | -0.270 |
| -0.796 | -0.550 | 0.762  | 0.502  | 0.260  |
| -1.936 | -0.785 | 0.151  | 0.142  | 0.008  |
| -2.121 | -0.394 | 0.169  | 0.028  | 0.141  |
| -0.963 | -1.231 | 0.259  | 0.104  | 0.155  |
| -1.721 | -1.903 | 0.028  | -0.150 | 0.177  |
| 0.507  | 0.862  | 0.197  | -0.308 | 0.505  |
| 1.345  | 0.955  | 0.067  | -0.356 | 0.423  |
| -0.212 | -0.564 | 0.971  | 0.232  | 0.739  |
| -2.697 | -3.169 | -0.558 | 1.168  | -1.726 |
| 1.163  | 1.720  | -0.167 | -0.202 | 0.035  |
| 2.180  | 2.286  | 0.096  | 0.151  | -0.055 |
| -1.645 | -1.555 | 0.038  | -0.238 | 0.276  |
| -1.690 | -1.327 | -0.055 | -0.458 | 0.403  |
| 1.069  | 0.745  | 0.793  | 0.390  | 0.403  |
| 2.658  | 2.192  | 0.029  | -0.197 | 0.227  |
| 0.168  | 0.296  | 0.227  | -0.168 | 0.395  |
| 2.110  | 2.584  | 0.173  | -0.249 | 0.421  |
| 0.524  | 1.043  | 0.640  | 0.262  | 0.378  |
| 1.791  | 2.144  | 0.026  | -0.604 | 0.630  |
| 2.307  | 2.611  | 0.382  | -0.197 | 0.579  |
| 2.620  | 2.178  | -0.410 | -0.074 | -0.335 |
| 1.284  | 1.735  | 0.330  | 0.525  | -0.195 |
| 2.902  | 2.201  | -0.018 | 0.289  | -0.307 |
| -1.488 | -0.836 | 0.271  | 0.025  | 0.245  |
| 1.437  | 1.707  | 0.046  | 0.272  | -0.226 |
| 0.199  | 0.446  | 0.322  | -0.028 | 0.349  |
| 0.887  | -0.161 | -0.105 | -0.205 | 0.100  |
| 0.926  | 1.123  | 0.311  | -0.247 | 0.558  |
| -0.690 | -0.755 | -0.101 | 0.264  | -0.366 |
| -2.649 | -2.092 | 0.111  | -0.616 | 0.727  |
| 0.053  | 0.796  | 0.381  | -0.150 | 0.531  |
| -1.499 | -0.956 | -0.234 | 0.444  | -0.678 |
| 1.598  | 1.677  | 0.088  | 0.424  | -0.335 |
| -1.337 | -1.040 | 0.203  | -0.435 | 0.638  |
| -2.322 | -1.629 | 0.093  | 0.871  | -0.778 |
| -1.470 | -0.090 | -0.271 | -0.583 | 0.312  |
| -1.692 | -1.556 | 0.312  | 0.066  | 0.246  |
| -0.120 | -0.252 | -0.122 | 0.048  | -0.170 |
| -1.237 | -1.904 | -0.092 | 0.474  | -0.566 |
| -1.825 | -1.217 | 0.510  | -0.382 | 0.892  |
| 1.641  | 1.967  | 0.412  | -0.423 | 0.835  |
| 0.247  | 0.376  | -0.189 | -0.227 | 0.038  |
| 2.883  | 2.206  | 0.198  | -0.652 | 0.849  |
| -0.212 | 0.873  | -0.162 | -1.516 | 1.354  |

|        |        |        |        |        |
|--------|--------|--------|--------|--------|
| -2.545 | -1.270 | -0.508 | -0.147 | -0.361 |
| -0.740 | -1.604 | 0.138  | 0.344  | -0.205 |
| 0.564  | 0.032  | 0.117  | 0.359  | -0.242 |
| 1.358  | 1.733  | 0.310  | -0.008 | 0.318  |
| 0.541  | 0.286  | 0.450  | 0.816  | -0.366 |
| -1.823 | -0.684 | -0.571 | -0.898 | 0.327  |
| -2.962 | -2.433 | 0.426  | 0.447  | -0.021 |
| -1.684 | -1.610 | -0.130 | 0.211  | -0.341 |
| -2.153 | -2.811 | -0.279 | -0.615 | 0.337  |
| 1.260  | 0.935  | 0.375  | 0.379  | -0.004 |
| 1.582  | 0.021  | 0.366  | 0.761  | -0.395 |
| -2.675 | -1.558 | -0.218 | -0.265 | 0.048  |
| -0.667 | -0.931 | -0.493 | -0.149 | -0.344 |
| -1.035 | -0.857 | -0.458 | -0.631 | 0.173  |
| 1.079  | 0.232  | 0.331  | 0.574  | -0.243 |
| 2.403  | 1.546  | 0.082  | 0.032  | 0.050  |
| -0.403 | -0.224 | 0.623  | 0.059  | 0.563  |
| -0.178 | 0.301  | -0.013 | -0.570 | 0.557  |
| 2.006  | 0.621  | -0.246 | -0.222 | -0.024 |
| -1.410 | -1.146 | 0.274  | -0.652 | 0.926  |
| 0.080  | -0.626 | 0.048  | 0.065  | -0.016 |
| 0.945  | 1.658  | 0.069  | -0.034 | 0.102  |
| -1.531 | -1.791 | 0.260  | 0.906  | -0.645 |
| -2.457 | -2.145 | 0.168  | -0.341 | 0.509  |
| -0.125 | -1.626 | -0.371 | -0.157 | -0.214 |
| 0.557  | 0.708  | -0.364 | 1.171  | -1.536 |
| 0.407  | 0.279  | 0.308  | 0.484  | -0.176 |
| 0.408  | 0.934  | 0.401  | -0.018 | 0.419  |
| -1.821 | -1.936 | 0.514  | -0.703 | 1.217  |
| -1.227 | -0.043 | 0.116  | -0.042 | 0.158  |
| -0.732 | 0.249  | -0.261 | -0.433 | 0.172  |
| -0.909 | -1.252 | 0.650  | -0.428 | 1.078  |
| 2.858  | 1.450  | 0.139  | 0.149  | -0.010 |
| -1.774 | -1.244 | 0.194  | -0.249 | 0.443  |
| 1.888  | 1.261  | 0.508  | 0.100  | 0.408  |
| -2.372 | -1.837 | 0.056  | -0.175 | 0.231  |
| -2.173 | -2.010 | 0.305  | 0.220  | 0.084  |
| 0.776  | -0.327 | -0.703 | -0.117 | -0.586 |
| 2.942  | 2.561  | 0.618  | 0.256  | 0.362  |
| 0.565  | 0.662  | 0.076  | 0.260  | -0.185 |
| -2.393 | -1.231 | 0.029  | -0.646 | 0.675  |
| -1.627 | -0.883 | -0.064 | 0.031  | -0.095 |
| 0.066  | 0.234  | 0.134  | -0.086 | 0.220  |
| -0.302 | -0.672 | -0.059 | 0.232  | -0.291 |
| -0.290 | 0.279  | 0.180  | 0.336  | -0.157 |
| -0.677 | 0.550  | 0.044  | -0.002 | 0.045  |
| -0.944 | -0.275 | 0.181  | 0.312  | -0.131 |
| -2.934 | -2.435 | -0.220 | -0.579 | 0.359  |
| -2.994 | -2.435 | -0.126 | -0.562 | 0.436  |
| 1.973  | 1.009  | 0.489  | 0.816  | -0.327 |
| 0.608  | 1.083  | 0.041  | -0.249 | 0.290  |

|        |        |        |        |        |
|--------|--------|--------|--------|--------|
| -2.141 | -1.435 | -1.574 | -0.654 | -0.920 |
| -0.624 | -0.638 | 0.993  | -0.148 | 1.140  |
| -2.337 | -2.070 | -0.047 | -0.186 | 0.138  |
| -1.571 | -1.776 | 0.087  | -0.570 | 0.657  |
| -3.365 | -2.720 | -0.116 | -0.364 | 0.247  |
| -0.248 | -0.219 | 0.134  | -0.571 | 0.704  |
| -0.859 | 0.630  | -0.111 | -0.604 | 0.494  |
| -2.454 | -2.804 | 0.091  | 0.175  | -0.084 |
| 0.187  | 1.042  | -0.231 | -1.007 | 0.775  |
| 0.857  | 0.259  | -0.080 | -0.165 | 0.085  |
| -0.686 | -1.815 | -0.561 | -0.497 | -0.064 |
| -1.603 | -0.538 | 0.465  | -0.593 | 1.057  |
| -1.492 | -0.566 | -0.018 | -1.104 | 1.086  |
| -2.198 | -2.188 | 0.012  | -0.429 | 0.441  |
| 0.388  | 0.679  | -0.706 | 0.097  | -0.803 |
| -0.721 | -1.154 | 0.109  | -0.441 | 0.550  |
| -1.836 | -1.958 | 0.136  | -0.260 | 0.396  |
| -2.508 | -2.160 | -0.230 | -0.098 | -0.132 |
| 1.440  | 0.943  | 0.134  | 0.212  | -0.078 |
| -2.844 | -2.427 | 0.192  | -0.812 | 1.004  |
| 2.167  | 2.108  | -0.656 | -0.672 | 0.016  |
| -0.300 | -0.122 | 0.282  | -0.482 | 0.763  |
| 1.694  | 1.595  | 0.471  | -0.247 | 0.719  |
| 2.289  | 2.341  | 0.104  | -0.764 | 0.868  |
| 1.298  | 0.672  | -0.241 | 0.172  | -0.413 |
| -1.565 | -1.635 | 0.218  | 0.249  | -0.031 |
| 0.002  | -0.588 | 0.262  | 0.085  | 0.177  |
| -3.066 | -1.318 | -0.365 | -0.460 | 0.095  |
| -0.365 | 0.471  | 0.312  | 0.148  | 0.164  |
| 1.191  | 0.427  | 0.548  | -0.287 | 0.835  |
| 0.857  | -0.043 | 0.068  | 0.228  | -0.160 |
| -0.831 | -1.268 | -0.030 | 0.324  | -0.354 |
| 0.891  | 0.063  | 0.319  | 0.062  | 0.257  |
| 0.095  | 0.281  | 0.537  | -0.111 | 0.647  |
| -2.946 | -2.142 | -0.127 | -0.347 | 0.220  |
| -0.715 | -0.195 | 0.243  | -0.239 | 0.482  |
| -0.109 | 0.274  | 0.614  | 0.376  | 0.237  |
| 3.102  | 2.013  | 0.185  | 0.342  | -0.156 |
| -1.180 | -1.421 | 0.612  | 0.680  | -0.069 |
| -0.891 | -0.091 | -0.062 | -0.072 | 0.010  |
| -1.208 | 0.241  | 0.104  | -0.192 | 0.296  |
| -0.117 | -0.060 | 0.132  | -0.168 | 0.299  |
| -1.079 | -0.611 | 0.057  | -0.224 | 0.281  |
| 1.957  | 2.110  | -0.233 | -0.071 | -0.162 |
| 0.485  | -0.161 | 0.414  | 0.264  | 0.151  |
| -0.955 | -0.380 | 0.115  | -0.552 | 0.667  |
| 1.019  | 1.635  | -0.312 | -0.221 | -0.090 |
| 0.604  | -0.073 | 0.075  | -0.026 | 0.101  |
| 1.162  | -0.053 | 0.065  | 0.018  | 0.047  |
| -0.492 | -0.661 | 0.011  | -0.205 | 0.215  |
| -0.183 | -0.786 | 0.163  | 0.012  | 0.151  |

|        |        |        |        |        |
|--------|--------|--------|--------|--------|
| -0.512 | -1.593 | 0.108  | -0.148 | 0.256  |
| 0.548  | 0.663  | 0.380  | -0.070 | 0.450  |
| 0.245  | -0.397 | 0.302  | 0.779  | -0.477 |
| 1.275  | 1.121  | -0.464 | 1.303  | -1.767 |
| -1.392 | -0.731 | 0.625  | 0.467  | 0.159  |
| -0.319 | 0.107  | -0.419 | 0.180  | -0.599 |
| -1.407 | -0.175 | -0.313 | -0.513 | 0.200  |
| 0.159  | 0.230  | -1.007 | 0.241  | -1.248 |
| -1.051 | -0.530 | -0.723 | 0.486  | -1.209 |
| 0.500  | 0.027  | 0.214  | 0.386  | -0.172 |
| 0.371  | 0.208  | -0.319 | 0.791  | -1.109 |
| -0.981 | -0.054 | -1.161 | 0.203  | -1.364 |
| -0.705 | 0.241  | -0.708 | 0.233  | -0.941 |
| -0.788 | -0.278 | 0.129  | -0.351 | 0.480  |
| -0.982 | -0.835 | 0.061  | -0.276 | 0.338  |
| -1.400 | -1.732 | -0.355 | -0.291 | -0.064 |
| -1.248 | -1.701 | -0.187 | -0.632 | 0.445  |
| -1.954 | -1.532 | 0.224  | -0.173 | 0.398  |
| 0.899  | 1.120  | 0.295  | 0.069  | 0.226  |
| -2.459 | -1.884 | 0.177  | -0.448 | 0.626  |
| -0.261 | -1.059 | 0.419  | -0.446 | 0.866  |
| -1.325 | -2.072 | 0.313  | 0.265  | 0.048  |
| -2.592 | -2.038 | -0.112 | -0.260 | 0.148  |
| -1.566 | -1.080 | 0.068  | -0.422 | 0.490  |
| -1.565 | -0.931 | 0.007  | -1.490 | 1.497  |
| 0.028  | 0.124  | 0.122  | 0.465  | -0.343 |
| 0.922  | 0.126  | 0.002  | 0.104  | -0.102 |
| 0.227  | -0.537 | 0.295  | 0.611  | -0.316 |
| -3.153 | -2.737 | -0.262 | -1.082 | 0.821  |
| -1.290 | -1.134 | -0.180 | -0.201 | 0.020  |
| 0.016  | -0.289 | 0.594  | 0.089  | 0.505  |
| 0.335  | -0.622 | 0.245  | 0.505  | -0.260 |
| -1.069 | -1.465 | 0.279  | 0.320  | -0.042 |
| -1.521 | -1.521 | 0.176  | -0.075 | 0.251  |
| -1.305 | -1.341 | 0.012  | -0.040 | 0.052  |
| -2.610 | -2.212 | 0.263  | -0.256 | 0.520  |
| -2.379 | -2.142 | -0.291 | -0.401 | 0.109  |
| -1.388 | -1.089 | -0.788 | -0.666 | -0.121 |
| -1.715 | -2.073 | 0.051  | -0.043 | 0.094  |
| -3.679 | -3.493 | -0.118 | -0.235 | 0.117  |
| -2.861 | -2.052 | -0.636 | -0.786 | 0.151  |
| -0.105 | -0.056 | 0.656  | -0.315 | 0.971  |
| -1.291 | -1.607 | 0.166  | 0.121  | 0.045  |
| -1.452 | -1.316 | 0.605  | -0.283 | 0.888  |
| -0.923 | -0.774 | 0.122  | -0.151 | 0.273  |
| -0.094 | 0.480  | 0.534  | -0.372 | 0.906  |
| 0.040  | 0.112  | 0.385  | -0.471 | 0.856  |
| -1.963 | -1.954 | 0.266  | -0.088 | 0.354  |
| -0.101 | -0.354 | 0.351  | -0.197 | 0.548  |
| -0.121 | 0.303  | 0.134  | -0.407 | 0.541  |
| -2.042 | -1.196 | -0.046 | -0.475 | 0.430  |

|        |        |        |        |        |
|--------|--------|--------|--------|--------|
| 0.855  | 0.286  | -0.756 | -0.207 | -0.549 |
| 1.706  | 1.513  | 0.386  | 0.209  | 0.177  |
| -3.637 | -1.627 | -0.471 | -0.382 | -0.090 |
| -0.047 | -0.389 | -0.603 | -0.463 | -0.140 |
| -1.049 | -1.641 | 0.275  | 0.188  | 0.088  |
| -0.700 | -0.448 | 0.340  | -0.311 | 0.650  |
| -0.440 | -0.813 | -0.607 | -0.450 | -0.157 |
| -4.176 | -3.466 | -0.227 | 0.016  | -0.244 |
| -2.089 | -2.345 | -0.118 | -0.282 | 0.164  |
| 0.504  | 0.790  | -0.254 | -0.430 | 0.176  |
| -1.042 | -0.810 | 0.220  | -0.957 | 1.177  |
| -3.000 | -2.551 | -0.203 | -0.535 | 0.331  |
| -2.958 | -0.752 | 0.688  | 0.245  | 0.443  |
| -4.195 | -3.627 | -0.127 | -0.722 | 0.595  |
| -2.474 | -2.144 | 0.190  | -0.271 | 0.461  |
| -3.430 | -2.540 | -0.017 | -0.575 | 0.559  |
| -3.007 | -2.517 | -0.172 | -0.736 | 0.564  |
| -3.488 | -3.254 | -0.146 | -0.415 | 0.269  |
| -2.156 | -2.098 | 0.089  | -0.130 | 0.219  |
| -4.460 | -4.025 | -0.144 | -0.296 | 0.152  |
| -4.238 | -3.288 | -0.182 | -0.075 | -0.107 |
| -4.096 | -3.525 | -0.369 | -0.673 | 0.304  |
| -0.412 | -0.851 | -0.105 | 0.283  | -0.388 |
| 2.235  | 1.303  | -0.007 | 1.020  | -1.027 |
| 0.067  | -0.453 | -0.224 | -0.672 | 0.448  |
| 1.192  | 0.208  | -0.197 | -0.043 | -0.154 |
| 1.526  | 0.111  | 0.439  | 0.515  | -0.076 |
| -1.736 | -1.143 | -0.280 | -0.379 | 0.098  |
| 0.375  | -0.930 | -0.271 | 0.476  | -0.747 |
| -1.519 | -0.968 | 0.524  | 0.098  | 0.426  |
| 1.050  | -0.485 | 0.369  | 0.459  | -0.090 |
| -0.421 | -0.671 | 0.352  | 0.097  | 0.255  |
| 0.159  | -0.128 | 0.108  | 0.379  | -0.271 |
| 1.073  | 0.413  | -0.526 | 1.134  | -1.660 |
| -1.427 | -0.919 | -0.192 | -0.066 | -0.125 |
| 0.022  | -0.863 | 0.056  | 0.419  | -0.363 |
| -1.102 | -1.383 | 0.160  | -0.066 | 0.225  |
| -0.251 | 0.227  | 0.006  | -0.120 | 0.127  |
| -0.224 | 0.346  | 0.348  | -0.369 | 0.716  |
| -0.720 | -1.019 | 0.293  | 0.025  | 0.269  |
| 1.513  | 2.261  | 0.144  | -0.008 | 0.151  |
| -0.284 | 0.216  | 0.319  | 0.187  | 0.132  |
| 2.305  | 2.247  | 0.605  | 0.274  | 0.330  |
| -0.116 | -0.540 | -0.255 | -0.031 | -0.224 |
| -0.672 | 0.788  | -0.022 | -0.047 | 0.025  |
| -0.137 | -0.711 | -0.306 | 0.164  | -0.470 |
| 0.687  | 0.791  | 0.385  | 0.081  | 0.304  |
| -0.210 | -0.061 | -0.800 | -0.730 | -0.070 |
| -1.483 | -1.933 | 0.120  | 0.258  | -0.139 |
| -1.093 | -1.348 | -0.195 | 0.332  | -0.526 |
| 1.373  | 0.709  | 0.218  | 0.399  | -0.181 |



|        |        |        |        |        |
|--------|--------|--------|--------|--------|
| -2.133 | -1.605 | 0.398  | -0.179 | 0.577  |
| -0.718 | -1.036 | -0.941 | -0.383 | -0.558 |
| -1.047 | -0.839 | -0.095 | -0.273 | 0.178  |
| 1.043  | 1.934  | 0.294  | 0.348  | -0.055 |
| 0.042  | -0.505 | 0.212  | -0.104 | 0.317  |
| 2.229  | 1.652  | 0.473  | 0.018  | 0.455  |
| -1.423 | -2.059 | -0.439 | -0.340 | -0.099 |
| -0.473 | -0.007 | 0.154  | -0.286 | 0.440  |
| -1.462 | -1.005 | -0.380 | -0.226 | -0.154 |
| 0.710  | 0.813  | -0.031 | -0.214 | 0.183  |
| 1.188  | 0.530  | -0.856 | -0.283 | -0.573 |
| -4.193 | -3.315 | -0.369 | -0.341 | -0.028 |
| -2.955 | -2.351 | -0.112 | -0.897 | 0.785  |
| -2.726 | -3.262 | 0.408  | -0.948 | 1.356  |
| 3.021  | 1.963  | 0.388  | 0.239  | 0.149  |
| 2.021  | 1.989  | 0.676  | 0.102  | 0.573  |
| -2.723 | -1.469 | -0.485 | -0.682 | 0.197  |
| -0.989 | -1.526 | 0.043  | 0.058  | -0.015 |
| -1.336 | -1.507 | -0.128 | -0.592 | 0.464  |
| -0.949 | -0.744 | -0.509 | 0.129  | -0.638 |
| -2.040 | -1.904 | -0.211 | -0.883 | 0.672  |
| 0.016  | -0.644 | 0.372  | 0.437  | -0.065 |
| -1.359 | -1.139 | 1.033  | -0.320 | 1.353  |
| -0.232 | -0.685 | 0.866  | 0.210  | 0.656  |
| -2.137 | -1.679 | -0.448 | -0.488 | 0.039  |
| -1.962 | -0.922 | -0.674 | -0.350 | -0.324 |
| 2.246  | 2.181  | -0.370 | -0.026 | -0.344 |
| 0.768  | 0.169  | 0.487  | 0.317  | 0.170  |
| -0.884 | -0.795 | -0.164 | -0.497 | 0.332  |
| -2.456 | -1.965 | -0.381 | 0.022  | -0.403 |
| -1.722 | -1.367 | 0.347  | -0.397 | 0.744  |
| -1.645 | -2.555 | 0.121  | 0.309  | -0.188 |
| -0.911 | -1.305 | 0.002  | 0.231  | -0.229 |
| -1.653 | -1.588 | 0.111  | 0.386  | -0.275 |
| -0.485 | -0.298 | 0.062  | -0.019 | 0.081  |
| -2.323 | -0.556 | 0.027  | 0.066  | -0.038 |
| 0.149  | -1.007 | 0.131  | 0.269  | -0.138 |
| -0.197 | -1.442 | 0.207  | 0.407  | -0.199 |
| 1.825  | 2.206  | -0.174 | -0.123 | -0.051 |
| 2.405  | 1.546  | -0.068 | 0.119  | -0.187 |
| 1.749  | 0.700  | 0.986  | 0.217  | 0.769  |
| -0.820 | 0.274  | 0.293  | -0.592 | 0.885  |
| 0.877  | -0.559 | 0.072  | 0.182  | -0.110 |
| 0.236  | 0.970  | 0.109  | -0.555 | 0.664  |
| -0.311 | 0.232  | -0.248 | -0.647 | 0.399  |
| 1.237  | 0.803  | 0.362  | 0.110  | 0.252  |
| 0.593  | 1.535  | 0.122  | -0.392 | 0.514  |
| 1.142  | -0.186 | -0.006 | 0.093  | -0.099 |
| -0.926 | -1.104 | -0.234 | 0.658  | -0.891 |
| -0.240 | 1.154  | 0.185  | -0.348 | 0.533  |
| -1.861 | -0.883 | 0.730  | -0.682 | 1.412  |

|        |        |        |        |        |
|--------|--------|--------|--------|--------|
| 1.719  | 1.871  | 0.611  | 0.319  | 0.292  |
| -0.877 | -1.050 | 0.385  | 0.296  | 0.089  |
| 2.125  | 2.067  | 0.480  | -0.036 | 0.517  |
| 1.916  | 1.761  | 0.896  | 0.089  | 0.808  |
| -2.168 | -1.117 | -0.284 | -0.230 | -0.053 |
| -1.335 | -1.684 | 0.170  | -0.129 | 0.299  |
| -1.246 | -1.005 | 0.146  | -1.275 | 1.421  |
| -2.955 | -1.555 | -0.319 | -0.587 | 0.269  |
| 2.897  | 2.390  | 0.472  | -0.201 | 0.673  |
| -1.492 | -1.617 | 0.052  | 0.312  | -0.260 |
| 2.302  | 2.311  | 0.180  | 0.121  | 0.059  |
| -0.977 | -1.208 | 0.243  | -0.270 | 0.513  |
| -1.369 | -1.633 | 0.095  | 0.274  | -0.179 |
| -0.710 | -0.477 | 0.211  | -0.848 | 1.059  |
| 1.515  | 1.913  | -0.414 | -0.791 | 0.377  |
| 2.338  | 1.689  | 0.206  | 0.414  | -0.209 |
| -0.237 | -0.734 | 0.409  | -0.270 | 0.679  |
| 0.414  | 0.547  | 0.285  | 0.207  | 0.078  |
| 1.155  | 0.693  | -0.089 | 0.236  | -0.324 |
| 0.007  | 0.832  | -0.162 | 0.406  | -0.567 |
| 0.497  | 0.938  | 0.120  | -0.113 | 0.233  |
| -1.500 | -1.281 | -0.669 | -0.617 | -0.052 |
| 0.973  | 1.273  | -1.558 | -0.471 | -1.088 |
| 0.479  | -0.068 | -0.711 | -0.615 | -0.096 |
| 0.908  | -0.837 | -0.012 | -0.070 | 0.059  |
| 2.075  | 2.633  | -1.085 | -0.624 | -0.461 |
| -0.572 | -0.627 | -0.325 | -0.559 | 0.234  |
| 0.299  | 0.543  | -0.143 | -0.223 | 0.081  |
| 0.275  | 0.983  | 0.028  | 0.504  | -0.476 |
| -0.318 | -1.306 | -0.128 | -0.251 | 0.123  |
| 1.356  | 0.938  | -0.116 | 0.156  | -0.272 |
| -1.548 | -1.131 | 0.528  | -0.396 | 0.924  |
| -1.969 | -1.485 | 0.118  | 0.002  | 0.116  |
| 0.696  | 1.409  | 0.016  | -0.212 | 0.228  |
| -0.170 | -0.746 | 0.036  | -0.070 | 0.106  |
| 0.202  | -0.066 | 0.657  | 0.849  | -0.193 |
| -2.092 | -0.747 | -0.562 | 0.076  | -0.638 |
| -1.782 | -1.518 | -0.650 | -0.460 | -0.190 |
| 0.740  | 0.827  | 0.198  | 0.264  | -0.066 |
| -2.411 | -1.150 | -0.252 | -0.109 | -0.142 |
| -0.390 | -0.931 | -0.545 | -0.248 | -0.298 |
| -1.291 | -1.048 | -0.128 | 0.492  | -0.620 |
| -0.511 | -0.436 | 0.106  | 0.157  | -0.050 |
| -0.371 | 0.510  | -0.476 | -0.104 | -0.372 |
| -0.997 | -0.548 | -0.396 | -0.453 | 0.056  |
| 1.007  | 0.701  | 0.518  | 0.372  | 0.147  |
| 2.058  | 1.264  | -0.777 | 0.209  | -0.986 |
| -0.178 | 0.646  | -0.422 | -1.311 | 0.889  |
| -1.650 | -1.420 | -0.287 | -0.676 | 0.388  |
| 0.391  | 0.774  | 0.331  | -0.586 | 0.916  |
| -2.921 | -2.446 | -0.157 | -0.426 | 0.269  |

|        |        |        |        |        |
|--------|--------|--------|--------|--------|
| 0.873  | 0.840  | 0.338  | 0.403  | -0.065 |
| 0.133  | -0.364 | 0.066  | 0.309  | -0.243 |
| -1.033 | -0.638 | 0.153  | 0.138  | 0.015  |
| 0.829  | 0.264  | -0.275 | -0.151 | -0.123 |
| -0.688 | -1.627 | -0.073 | 0.479  | -0.552 |
| 0.066  | -1.101 | -0.415 | -0.122 | -0.293 |
| 0.245  | 0.387  | 0.670  | -0.055 | 0.725  |
| 0.467  | 0.677  | -0.019 | -0.117 | 0.097  |
| -3.237 | -2.596 | -0.100 | -0.493 | 0.392  |
| -0.993 | -0.489 | 0.119  | -0.209 | 0.328  |
| 0.149  | 0.313  | -0.184 | -0.325 | 0.141  |
| -4.001 | -3.382 | -0.263 | -0.228 | -0.035 |
| -0.882 | -1.355 | 0.542  | 0.601  | -0.059 |
| -0.400 | -0.703 | 0.284  | -0.065 | 0.349  |
| -2.620 | -1.167 | 0.118  | 0.393  | -0.274 |
| -1.301 | -1.527 | 0.209  | 0.263  | -0.054 |
| -1.582 | -1.419 | 0.450  | 0.563  | -0.113 |
| 0.106  | -0.929 | -0.212 | 0.491  | -0.703 |
| -1.561 | -1.198 | 0.471  | -0.414 | 0.884  |
| 2.888  | 2.802  | -0.453 | -0.279 | -0.175 |
| -1.898 | -1.416 | -0.535 | -0.218 | -0.318 |
| 1.424  | 0.656  | -0.202 | -0.038 | -0.164 |
| 1.738  | 1.331  | 0.102  | -0.317 | 0.419  |
| 0.292  | -0.077 | 0.859  | 0.032  | 0.827  |
| 0.531  | 0.907  | -0.111 | -0.287 | 0.176  |
| 0.539  | 0.693  | -0.324 | -0.044 | -0.280 |
| -2.669 | -2.397 | -0.333 | 0.527  | -0.860 |
| 0.411  | -0.007 | 0.601  | 0.431  | 0.170  |
| -0.310 | -0.066 | -0.400 | -0.597 | 0.197  |
| -0.157 | 0.078  | 0.598  | -0.049 | 0.647  |
| 0.081  | 0.296  | -0.055 | -0.299 | 0.244  |
| -1.650 | -1.607 | 0.328  | -0.404 | 0.732  |
| -1.592 | -1.552 | 0.201  | 0.138  | 0.064  |
| 0.183  | 0.582  | 1.026  | 0.633  | 0.393  |
| 0.163  | 0.338  | 0.204  | -0.509 | 0.713  |
| -0.022 | -0.625 | -0.298 | -0.131 | -0.167 |
| -1.889 | -1.521 | -0.469 | -0.322 | -0.147 |
| -1.638 | -0.636 | -0.417 | -0.418 | 0.001  |
| -0.279 | -1.279 | -0.123 | 0.132  | -0.254 |
| 0.786  | 0.999  | 0.229  | 0.033  | 0.196  |
| -3.754 | -3.215 | -0.392 | -0.695 | 0.303  |
| -2.539 | -2.336 | -1.288 | -0.641 | -0.647 |
| -0.458 | -0.975 | -0.816 | -0.305 | -0.511 |
| -3.105 | -2.720 | -0.352 | -0.945 | 0.593  |
| -2.267 | -2.354 | 0.161  | 0.364  | -0.204 |
| 1.159  | 0.625  | -0.171 | 0.061  | -0.232 |
| 0.173  | 0.518  | 0.004  | 0.198  | -0.193 |
| 0.392  | 0.854  | 0.472  | -0.199 | 0.671  |
| 1.772  | 0.903  | 0.629  | 0.248  | 0.381  |
| -1.174 | -0.673 | 0.414  | -0.160 | 0.574  |
| 2.619  | 1.517  | -0.022 | 0.418  | -0.440 |

|        |        |        |        |        |
|--------|--------|--------|--------|--------|
| 0.806  | 0.886  | -0.322 | -0.111 | -0.211 |
| 1.609  | 1.097  | 0.654  | -0.100 | 0.754  |
| -0.856 | 0.668  | -0.369 | -0.452 | 0.083  |
| 1.912  | 1.566  | 0.006  | 0.198  | -0.192 |
| -0.754 | -1.631 | 0.108  | 0.644  | -0.536 |
| 0.631  | 2.562  | -0.366 | -0.852 | 0.485  |
| -1.558 | -1.408 | 0.025  | -0.224 | 0.248  |
| 0.617  | 0.343  | -0.028 | -0.263 | 0.235  |
| -1.597 | -1.118 | 0.214  | -0.578 | 0.791  |
| 0.998  | 0.981  | -0.284 | -0.403 | 0.119  |
| -0.863 | -0.189 | 0.290  | -0.508 | 0.798  |
| 0.065  | -0.354 | 0.296  | 0.458  | -0.162 |
| 0.234  | 0.079  | -0.507 | 0.239  | -0.746 |
| 0.518  | 0.832  | -0.145 | 0.017  | -0.162 |
| -2.889 | -2.547 | -0.054 | -0.415 | 0.361  |
| 1.936  | 2.578  | 0.106  | 0.276  | -0.170 |
| 0.860  | 1.396  | 0.142  | -0.260 | 0.402  |
| -1.455 | -0.958 | 0.048  | -0.256 | 0.304  |
| -1.119 | -0.964 | 0.675  | -0.353 | 1.027  |
| -3.337 | -2.946 | -0.624 | -0.309 | -0.315 |
| 0.266  | 1.632  | 0.113  | -0.307 | 0.421  |
| -1.074 | -1.181 | -0.001 | 0.074  | -0.074 |
| 0.893  | 1.569  | 0.298  | -0.592 | 0.890  |
| -1.621 | -1.949 | -0.376 | -0.232 | -0.144 |
| 1.005  | 0.239  | -0.346 | 0.577  | -0.923 |
| -0.033 | 0.656  | -0.037 | -0.169 | 0.132  |
| -1.658 | 0.013  | -0.210 | -0.608 | 0.398  |
| -2.309 | -2.278 | -0.381 | 0.149  | -0.530 |
| 0.592  | -0.227 | 0.313  | 0.773  | -0.460 |
| -1.785 | -1.297 | 0.235  | -0.255 | 0.490  |
| -1.218 | -0.522 | 0.180  | -0.059 | 0.239  |
| -1.921 | -1.067 | 0.084  | 0.917  | -0.833 |
| 0.707  | 1.388  | 0.683  | -0.349 | 1.032  |
| 0.201  | 0.232  | -0.557 | -1.165 | 0.609  |
| -1.926 | -1.406 | 0.023  | -0.020 | 0.042  |
| -0.879 | -0.218 | -0.467 | -1.543 | 1.076  |
| 1.392  | 0.861  | 0.431  | 0.182  | 0.249  |
| 0.560  | -0.275 | -0.334 | 0.276  | -0.610 |
| 1.610  | 0.676  | 0.387  | -0.025 | 0.412  |
| -1.429 | -1.169 | -0.144 | -0.651 | 0.506  |
| -1.168 | -1.421 | 0.059  | 0.117  | -0.058 |
| -0.875 | -1.316 | 0.047  | 0.425  | -0.379 |
| -1.531 | -0.976 | 0.569  | -0.142 | 0.710  |
| 0.913  | 0.610  | -0.132 | -0.150 | 0.019  |
| -0.383 | -1.173 | -0.166 | 0.016  | -0.182 |
| 0.936  | 0.586  | 0.069  | -0.177 | 0.246  |
| 0.920  | 1.509  | 0.509  | 0.084  | 0.425  |
| -0.348 | -0.521 | -0.231 | 0.294  | -0.524 |
| -0.615 | -0.686 | 0.130  | 0.235  | -0.105 |
| 0.225  | 0.295  | 0.123  | 0.134  | -0.011 |
| -0.690 | -0.779 | 0.461  | -0.788 | 1.249  |

|        |        |        |        |        |
|--------|--------|--------|--------|--------|
| 2.332  | 1.813  | -0.305 | 0.294  | -0.599 |
| 1.347  | 0.094  | -0.476 | -0.203 | -0.273 |
| -0.466 | -1.745 | 0.393  | -0.328 | 0.721  |
| 1.233  | 1.572  | 0.386  | -0.140 | 0.526  |
| 1.901  | 1.188  | 0.232  | 0.418  | -0.186 |
| 2.740  | 2.594  | 0.118  | -0.172 | 0.291  |
| 1.785  | 1.003  | 0.143  | 0.310  | -0.167 |
| 1.051  | 0.294  | -0.198 | 0.078  | -0.276 |
| 1.104  | 1.471  | 0.301  | -0.218 | 0.519  |
| 1.390  | 0.161  | 0.898  | 0.365  | 0.532  |
| -1.901 | -1.409 | 0.185  | -0.180 | 0.365  |
| -0.172 | -0.047 | 0.576  | -0.383 | 0.959  |
| -1.548 | -0.391 | 0.045  | 0.326  | -0.281 |
| -1.513 | -1.275 | -0.039 | -0.196 | 0.157  |
| -3.204 | -2.752 | 0.364  | -0.157 | 0.521  |
| 0.203  | -0.888 | -0.208 | -0.054 | -0.154 |
| 1.810  | 1.329  | -0.064 | 0.184  | -0.249 |
| -2.178 | -1.579 | 0.092  | -0.209 | 0.302  |
| -0.526 | -0.647 | 0.472  | -0.294 | 0.767  |
| 1.473  | 0.670  | 0.642  | 0.678  | -0.035 |
| 1.531  | 1.398  | 0.220  | -0.122 | 0.342  |
| -0.536 | -1.361 | -0.212 | -0.044 | -0.169 |
| -1.347 | -1.529 | 0.040  | -0.288 | 0.327  |
| -3.215 | -2.609 | 0.145  | -0.653 | 0.798  |
| -1.312 | -0.688 | -0.302 | -0.704 | 0.401  |
| -0.775 | -0.856 | 0.266  | -0.063 | 0.329  |
| -1.479 | -0.812 | 0.687  | -0.540 | 1.227  |
| 0.488  | 0.036  | -0.227 | 0.486  | -0.713 |
| -0.396 | -0.396 | 0.344  | -0.261 | 0.605  |
| 1.322  | 0.813  | -0.063 | 0.140  | -0.203 |
| 0.141  | -0.441 | -0.550 | -0.461 | -0.090 |
| -0.713 | -0.417 | 0.219  | -0.268 | 0.487  |
| 1.294  | 1.764  | -0.533 | -0.733 | 0.200  |
| -2.430 | -1.843 | -1.337 | -0.215 | -1.122 |
| -0.283 | -0.062 | 0.157  | 0.041  | 0.116  |
| 1.553  | 0.628  | 0.924  | 0.284  | 0.640  |
| -2.843 | -1.637 | 0.165  | 0.067  | 0.097  |
| -2.606 | -1.771 | -0.981 | 0.659  | -1.640 |
| -1.036 | -0.439 | -0.265 | -0.901 | 0.636  |
| -1.775 | -1.785 | 0.139  | 0.294  | -0.155 |
| -0.103 | 0.236  | 0.338  | 1.070  | -0.731 |
| -0.885 | -0.494 | -0.155 | 0.629  | -0.784 |
| 0.517  | -0.083 | 0.421  | 0.402  | 0.019  |
| -0.562 | -1.364 | 0.554  | 1.099  | -0.545 |
| 0.730  | 0.872  | -0.235 | 0.289  | -0.524 |
| -0.270 | 0.215  | -0.317 | 0.196  | -0.514 |
| 2.813  | 2.166  | 0.943  | 0.348  | 0.595  |
| -0.624 | -1.544 | 0.138  | 0.516  | -0.378 |
| 0.783  | 1.423  | -0.036 | 0.276  | -0.312 |
| 1.047  | 1.115  | 0.180  | 0.574  | -0.394 |
| -2.559 | -1.312 | -0.055 | 0.549  | -0.604 |

|        |        |        |        |        |
|--------|--------|--------|--------|--------|
| 2.371  | 2.466  | 0.163  | -0.066 | 0.229  |
| 1.225  | 1.052  | 0.420  | 0.148  | 0.271  |
| -0.592 | -0.166 | 0.280  | -0.061 | 0.341  |
| -0.063 | -0.937 | 0.385  | 0.605  | -0.220 |
| -1.211 | -0.614 | -0.042 | -0.435 | 0.392  |
| 0.460  | 0.557  | 0.225  | 0.276  | -0.051 |
| -1.581 | -1.397 | 0.085  | 0.732  | -0.647 |
| 0.882  | 0.434  | 0.304  | -0.167 | 0.471  |
| -1.964 | -1.425 | -0.133 | -0.071 | -0.061 |
| 0.139  | -0.844 | 0.378  | 0.470  | -0.093 |
| -0.729 | -1.521 | 0.346  | 0.733  | -0.387 |
| -0.131 | 0.341  | -0.264 | -0.125 | -0.140 |
| -1.323 | -1.535 | 0.265  | 0.531  | -0.266 |
| -0.652 | 0.004  | -0.132 | -0.195 | 0.063  |
| -0.380 | -0.347 | 0.250  | 0.443  | -0.193 |
| -1.303 | -1.000 | 0.384  | 0.212  | 0.172  |
| 0.712  | 0.386  | 0.172  | 0.090  | 0.082  |
| 2.129  | 0.839  | 0.134  | 0.105  | 0.030  |
| -0.550 | -0.088 | 0.137  | -0.528 | 0.665  |
| -1.484 | -1.687 | 0.092  | -0.259 | 0.351  |
| -1.534 | -0.998 | -0.086 | -0.741 | 0.655  |
| 1.671  | 1.739  | 0.538  | 0.144  | 0.394  |
| 1.364  | 1.874  | 0.896  | -0.195 | 1.091  |
| -0.531 | 0.025  | -0.211 | -0.086 | -0.126 |
| 2.001  | 2.969  | 0.427  | -0.130 | 0.557  |
| -2.526 | -3.153 | -0.138 | 0.052  | -0.190 |
| 2.689  | 2.232  | 0.037  | 0.267  | -0.230 |
| -0.921 | -0.534 | 0.178  | -0.369 | 0.547  |
| 1.915  | 0.794  | 0.047  | 0.274  | -0.227 |
| 0.865  | 0.789  | -0.309 | -0.534 | 0.225  |
| 1.703  | 0.597  | 0.275  | 0.123  | 0.151  |
| -0.688 | -0.184 | 0.073  | -0.001 | 0.073  |
| 1.669  | 0.587  | 0.246  | 0.606  | -0.360 |
| 1.977  | 1.468  | 0.194  | -0.065 | 0.260  |
| 2.424  | 1.643  | 0.448  | 0.393  | 0.055  |
| -3.144 | -3.201 | -0.817 | 0.130  | -0.947 |
| -0.224 | -1.244 | 0.217  | 0.519  | -0.302 |
| 0.166  | -0.250 | -0.654 | -0.320 | -0.333 |
| -0.463 | -0.239 | 0.247  | 0.081  | 0.165  |
| -1.655 | -2.112 | -0.177 | -0.410 | 0.232  |
| -1.241 | -1.512 | -0.003 | -0.403 | 0.401  |
| 0.437  | 0.054  | -0.029 | -0.041 | 0.012  |
| 0.568  | 0.673  | 0.210  | -0.100 | 0.310  |
| 2.129  | 2.129  | 0.690  | -0.110 | 0.800  |
| 0.053  | 0.040  | 0.145  | 0.188  | -0.043 |
| -0.152 | -0.500 | 0.635  | -0.103 | 0.738  |
| 0.389  | 0.229  | 0.249  | -0.224 | 0.473  |
| -0.042 | 0.719  | -0.140 | -0.581 | 0.442  |
| -1.772 | -1.101 | 0.104  | -0.491 | 0.595  |
| -1.274 | -1.142 | -0.578 | -0.548 | -0.030 |
| 1.035  | 1.477  | 0.357  | 0.002  | 0.355  |

|        |        |        |        |        |
|--------|--------|--------|--------|--------|
| 0.821  | 1.285  | -0.262 | 0.174  | -0.435 |
| -1.275 | -0.963 | 0.143  | -0.135 | 0.278  |
| -1.649 | -0.802 | 0.243  | -0.336 | 0.579  |
| 0.572  | 0.633  | 0.374  | 0.141  | 0.234  |
| -0.592 | -0.372 | -0.245 | -0.341 | 0.096  |
| 0.508  | 0.671  | -0.305 | -0.606 | 0.301  |
| 1.363  | 0.436  | -1.178 | -0.021 | -1.157 |
| 0.146  | 0.324  | -0.200 | -0.240 | 0.040  |
| -0.534 | 0.449  | 0.289  | 0.134  | 0.155  |
| -3.322 | -2.958 | -0.085 | -0.605 | 0.520  |
| 0.658  | 1.122  | 0.193  | 0.575  | -0.382 |
| -0.045 | 0.292  | 0.346  | -0.175 | 0.521  |
| -0.169 | 0.053  | 0.048  | -0.329 | 0.377  |
| 0.316  | 0.662  | -0.094 | -0.372 | 0.278  |
| -2.532 | -2.136 | 0.136  | -0.893 | 1.029  |
| -1.264 | -0.859 | -0.412 | -0.013 | -0.399 |
| -1.572 | -1.493 | 0.136  | -0.714 | 0.851  |
| 0.429  | 0.802  | 0.485  | -0.179 | 0.664  |
| -1.009 | -0.465 | 0.428  | 0.157  | 0.271  |
| -0.417 | -0.199 | 0.114  | -0.540 | 0.654  |
| -1.493 | -1.018 | -0.616 | 0.026  | -0.642 |
| -0.719 | -0.241 | 0.214  | 0.007  | 0.207  |
| -1.757 | -1.479 | -0.100 | -0.289 | 0.189  |
| -0.252 | -0.147 | 0.311  | -0.161 | 0.473  |
| 1.358  | 0.492  | -0.059 | 0.750  | -0.809 |
| 1.086  | 0.115  | 0.218  | 0.578  | -0.360 |
| -0.906 | -0.657 | -0.040 | 0.360  | -0.400 |
| 0.331  | -0.116 | 0.059  | 0.794  | -0.735 |
| 0.651  | 0.817  | 0.636  | 0.361  | 0.275  |
| 2.036  | 1.512  | 0.372  | 0.174  | 0.199  |
| 2.267  | 1.665  | 0.142  | 0.202  | -0.060 |
| 0.364  | 0.742  | 0.170  | -0.447 | 0.617  |
| 0.382  | -0.061 | -0.189 | -0.603 | 0.414  |
| 0.486  | 0.118  | 0.558  | 0.480  | 0.078  |
| -0.967 | -0.483 | 0.062  | 0.226  | -0.165 |
| -0.632 | 0.032  | 0.027  | 0.143  | -0.117 |
| 0.678  | -0.089 | 0.258  | 0.657  | -0.399 |
| 1.417  | 0.702  | 0.732  | 0.876  | -0.143 |
| 0.982  | 0.771  | 0.342  | 0.646  | -0.304 |
| 0.535  | -0.035 | 0.480  | 1.054  | -0.574 |
| -1.236 | -1.153 | 0.187  | -0.056 | 0.243  |
| 0.128  | 0.321  | -0.662 | 0.696  | -1.359 |
| -0.288 | -0.872 | 0.304  | 0.403  | -0.099 |
| -0.119 | -1.404 | 0.184  | 0.491  | -0.307 |
| 1.767  | 0.832  | 0.734  | 0.727  | 0.007  |
| 1.041  | 1.313  | 0.837  | -0.761 | 1.598  |
| 1.808  | 1.987  | 0.163  | 0.171  | -0.008 |
| 0.971  | 0.410  | 0.045  | 0.251  | -0.206 |
| -2.482 | -2.902 | 0.596  | -0.258 | 0.855  |
| 1.072  | 0.752  | 0.320  | -0.050 | 0.370  |
| 1.248  | 0.750  | 0.349  | 0.619  | -0.270 |

|        |        |        |        |        |
|--------|--------|--------|--------|--------|
| 0.836  | 1.590  | -0.169 | -0.050 | -0.119 |
| -0.341 | -0.656 | -1.346 | -0.494 | -0.852 |
| 0.534  | -0.355 | 0.243  | 0.248  | -0.005 |
| 0.969  | 0.600  | 0.586  | 0.316  | 0.270  |
| -0.305 | 0.109  | 0.162  | 0.257  | -0.095 |
| 2.168  | 2.269  | -0.108 | -0.233 | 0.125  |
| 2.030  | 1.330  | 0.324  | 0.503  | -0.179 |
| -1.575 | -1.422 | -0.414 | -0.013 | -0.400 |
| 0.878  | 0.720  | -0.832 | -0.544 | -0.287 |
| -0.195 | -0.975 | 0.405  | 0.506  | -0.101 |
| -0.500 | -0.960 | 0.439  | 0.664  | -0.225 |
| -0.580 | -0.774 | -0.312 | -1.051 | 0.739  |
| -0.498 | -1.016 | -0.055 | 0.477  | -0.531 |
| 0.241  | 0.189  | 0.175  | -0.019 | 0.194  |
| -1.455 | -0.577 | 0.395  | -0.528 | 0.923  |
| 1.063  | 1.700  | 0.199  | 0.037  | 0.162  |
| -0.920 | 0.892  | 0.233  | -0.535 | 0.769  |
| -1.592 | -2.697 | 0.486  | 0.719  | -0.233 |
| -1.765 | -1.002 | -0.158 | -1.099 | 0.941  |
| -1.111 | -0.458 | 0.128  | 0.516  | -0.389 |
| 1.871  | 2.274  | 0.990  | -0.137 | 1.126  |
| 0.287  | 1.596  | 0.279  | -0.626 | 0.904  |
| 2.163  | 2.628  | 0.171  | -0.218 | 0.389  |
| 1.646  | 1.662  | 0.585  | -0.287 | 0.872  |
| -1.017 | -0.801 | -0.080 | -0.639 | 0.559  |
| -0.531 | -1.578 | -0.310 | 0.431  | -0.741 |
| -0.749 | 0.279  | 0.018  | -0.419 | 0.437  |
| 1.931  | 1.521  | 0.312  | 0.207  | 0.105  |
| 0.240  | -0.748 | -0.215 | -0.092 | -0.123 |
| 0.685  | 1.334  | -0.344 | -0.432 | 0.089  |
| 2.075  | 0.679  | 0.146  | 0.506  | -0.360 |
| 1.541  | 0.624  | -0.118 | 0.473  | -0.591 |
| 0.194  | -0.915 | 0.430  | 0.102  | 0.328  |
| 1.794  | 1.770  | 0.225  | -0.056 | 0.281  |
| -1.362 | -0.346 | 1.772  | -0.414 | 2.185  |
| -0.060 | -1.384 | 0.166  | -0.284 | 0.450  |
| -1.757 | -1.794 | 0.242  | 0.929  | -0.687 |
| -1.469 | -1.519 | 0.285  | 0.095  | 0.191  |
| -1.017 | -1.121 | -0.077 | -0.150 | 0.073  |
| 1.412  | 1.594  | 0.053  | 0.335  | -0.282 |
| -3.165 | -2.672 | -0.300 | -0.089 | -0.211 |
| -0.776 | -0.530 | 0.043  | -0.152 | 0.195  |
| 0.052  | -0.971 | 0.633  | 0.546  | 0.087  |
| -2.462 | -1.828 | 0.187  | -0.118 | 0.305  |
| 0.647  | 0.209  | 0.285  | -0.191 | 0.476  |
| -0.072 | 0.543  | -0.566 | -0.556 | -0.011 |
| -1.002 | -0.799 | 0.636  | 0.329  | 0.307  |
| 1.676  | 0.853  | -0.307 | -0.178 | -0.129 |
| -1.565 | -1.373 | -0.287 | -0.317 | 0.030  |
| 0.587  | -0.926 | -0.186 | 0.508  | -0.695 |
| -0.769 | -0.145 | -0.185 | -0.032 | -0.153 |



|        |        |        |        |        |
|--------|--------|--------|--------|--------|
| -1.338 | -1.429 | 0.181  | -0.839 | 1.020  |
| 0.523  | 0.070  | 0.464  | 0.654  | -0.190 |
| 1.702  | 2.363  | 0.064  | -0.254 | 0.317  |
| -3.102 | -2.876 | -0.358 | -0.405 | 0.047  |
| 2.371  | 1.394  | 0.248  | 0.093  | 0.155  |
| -2.173 | -1.932 | -0.257 | -0.408 | 0.151  |
| -0.591 | -0.730 | 0.320  | -0.266 | 0.586  |
| -3.430 | -3.280 | -0.139 | 0.127  | -0.266 |
| -2.275 | -1.812 | 0.240  | 0.651  | -0.412 |
| -1.333 | -0.640 | 0.144  | 0.209  | -0.065 |
| 1.141  | 0.958  | 0.669  | -0.063 | 0.732  |
| -1.270 | -1.979 | -0.463 | -0.092 | -0.371 |
| -0.883 | -1.602 | 0.717  | 0.069  | 0.649  |
| 0.545  | -0.553 | -0.133 | 0.580  | -0.713 |
| 1.616  | 2.350  | -0.048 | -0.900 | 0.852  |
| -2.413 | -1.250 | 0.235  | -0.591 | 0.826  |
| 0.405  | 0.981  | 0.446  | 0.160  | 0.287  |
| 1.442  | 0.859  | 0.118  | 0.520  | -0.402 |
| -2.135 | -1.922 | 0.199  | 0.322  | -0.123 |
| -4.004 | -3.547 | 0.022  | 0.734  | -0.712 |
| -0.264 | -0.180 | 0.386  | 0.622  | -0.236 |
| -0.371 | -1.004 | 1.246  | 0.410  | 0.835  |
| -1.393 | -1.036 | 0.874  | -0.144 | 1.018  |
| -1.131 | -0.588 | -0.036 | -0.509 | 0.473  |
| 0.292  | 0.601  | -0.815 | -0.210 | -0.605 |
| -0.184 | 0.074  | -0.211 | 0.449  | -0.660 |
| -2.219 | -1.633 | 0.061  | -1.187 | 1.249  |
| 0.316  | -0.508 | 0.208  | 0.412  | -0.204 |
| -1.077 | -0.504 | 0.151  | 0.006  | 0.145  |
| 1.156  | 1.726  | -0.153 | -0.144 | -0.009 |
| -1.200 | -0.354 | 0.372  | 0.603  | -0.231 |
| -0.486 | -0.222 | -0.379 | -0.030 | -0.349 |
| -0.483 | -0.360 | 0.054  | -0.050 | 0.104  |
| -1.416 | -1.060 | -0.080 | -0.886 | 0.806  |
| -2.166 | -1.592 | 0.491  | -0.481 | 0.973  |
| -0.929 | -0.809 | 0.253  | 0.528  | -0.275 |
| 0.639  | 0.357  | 0.092  | 0.179  | -0.087 |
| 0.486  | -0.032 | -0.780 | 0.221  | -1.001 |
| 0.852  | 0.372  | -0.087 | 0.198  | -0.285 |
| 2.034  | 1.477  | -0.823 | -0.528 | -0.295 |
| -0.435 | 0.055  | 0.382  | -0.427 | 0.808  |
| 1.776  | 0.773  | 0.118  | 0.642  | -0.523 |
| 1.015  | 0.597  | 0.320  | 0.246  | 0.074  |
| -1.445 | -0.243 | -0.223 | -0.717 | 0.494  |
| 0.428  | 0.367  | 0.806  | -0.013 | 0.819  |
| -0.693 | -0.084 | -0.007 | -0.339 | 0.332  |
| 2.358  | 2.320  | 0.403  | 0.497  | -0.094 |
| -0.652 | -0.233 | -0.326 | -0.082 | -0.245 |
| -1.302 | -1.057 | 0.230  | -0.140 | 0.370  |
| 1.233  | 0.759  | 0.310  | 0.304  | 0.005  |
| 1.782  | 1.106  | 0.401  | 0.647  | -0.246 |

|        |        |        |        |        |
|--------|--------|--------|--------|--------|
| 0.214  | 0.813  | -0.256 | -0.543 | 0.288  |
| -2.078 | -1.669 | -0.119 | -0.045 | -0.074 |
| -1.957 | -2.043 | 1.831  | -0.125 | 1.955  |
| -0.727 | -0.493 | 0.555  | 0.073  | 0.482  |
| -1.976 | -1.830 | -0.265 | -0.028 | -0.237 |
| 0.817  | 1.139  | -0.323 | -0.542 | 0.219  |
| -0.450 | -0.415 | -0.754 | -0.572 | -0.182 |
| 0.536  | 0.163  | 0.212  | -0.062 | 0.274  |
| -1.883 | -1.716 | 0.242  | -0.350 | 0.592  |
| -2.706 | -2.464 | 0.026  | -0.119 | 0.146  |
| -0.836 | -0.011 | -0.068 | -0.313 | 0.245  |
| -3.623 | -3.104 | -0.620 | -1.451 | 0.832  |
| -1.368 | 0.206  | -0.120 | 0.154  | -0.274 |
| -2.241 | -1.535 | 0.190  | -0.660 | 0.849  |
| 1.536  | 0.128  | -0.117 | 0.005  | -0.122 |
| -1.238 | -0.984 | -0.183 | -0.441 | 0.259  |
| 0.836  | -0.452 | 0.151  | 0.797  | -0.645 |
| 0.914  | -0.347 | 0.002  | 0.331  | -0.328 |
| -2.918 | -2.530 | 0.450  | -0.582 | 1.032  |
| -0.457 | -1.385 | 0.280  | -0.294 | 0.574  |
| -1.335 | -0.509 | 0.145  | 0.209  | -0.064 |
| 0.925  | 0.155  | -0.155 | 0.210  | -0.365 |
| 0.813  | 0.345  | -0.359 | 0.055  | -0.414 |
| -0.585 | -1.405 | -0.043 | -0.764 | 0.720  |
| -3.569 | -2.929 | 0.262  | -0.916 | 1.179  |
| -1.364 | -1.567 | 0.116  | 0.240  | -0.124 |
| -2.014 | -1.161 | 0.111  | -0.324 | 0.435  |
| -0.129 | 0.067  | 0.315  | 0.028  | 0.287  |
| -0.721 | -1.396 | 0.278  | -0.247 | 0.524  |
| 0.240  | 0.047  | -0.378 | -0.103 | -0.275 |
| 3.587  | 2.507  | 0.634  | 0.248  | 0.386  |
| 2.551  | 1.495  | -0.183 | 0.439  | -0.622 |
| 0.404  | -0.289 | -0.328 | 0.677  | -1.005 |
| 1.399  | 0.882  | 0.539  | 0.058  | 0.480  |
| 0.626  | 0.772  | -0.299 | 0.490  | -0.789 |
| -3.178 | -3.193 | 0.079  | -0.004 | 0.083  |
| 0.911  | 1.349  | 0.725  | -0.232 | 0.957  |
| 2.146  | 1.576  | 0.475  | 0.256  | 0.220  |
| -2.165 | -1.770 | 0.031  | -0.183 | 0.214  |
| 1.535  | 0.620  | 0.235  | 0.411  | -0.176 |
| -0.877 | -0.870 | 0.000  | -0.407 | 0.407  |
| -1.329 | -0.332 | -0.041 | -0.607 | 0.567  |
| -0.554 | -1.213 | -0.031 | 0.049  | -0.080 |
| -1.017 | -1.786 | 0.226  | 0.575  | -0.349 |
| 2.058  | 1.418  | 0.357  | 0.339  | 0.018  |
| -1.718 | -1.493 | 0.281  | -0.528 | 0.810  |
| -1.389 | -0.632 | -0.769 | -0.880 | 0.111  |
| -0.709 | -0.694 | -0.282 | -0.394 | 0.112  |
| -1.328 | -0.825 | -0.194 | -0.805 | 0.611  |
| -0.813 | -1.286 | 0.357  | -0.285 | 0.642  |
| 1.791  | 1.346  | -0.837 | -0.916 | 0.079  |

|        |        |        |        |        |
|--------|--------|--------|--------|--------|
| 2.028  | 1.744  | -0.673 | -0.542 | -0.132 |
| -0.272 | -0.909 | 0.339  | -0.451 | 0.790  |
| 0.077  | -0.050 | 0.483  | -0.536 | 1.019  |
| 0.863  | 1.200  | 0.262  | -0.320 | 0.583  |
| 2.352  | 2.180  | 0.062  | 0.253  | -0.191 |
| -0.793 | -0.811 | -0.315 | -0.480 | 0.164  |
| -0.858 | -0.312 | -0.439 | -1.024 | 0.586  |
| -1.666 | -0.954 | 0.220  | -0.948 | 1.168  |
| 0.775  | 0.859  | -0.728 | -0.308 | -0.420 |
| 1.019  | 1.010  | 0.267  | 0.055  | 0.212  |
| 0.501  | 1.082  | -0.734 | -1.043 | 0.309  |
| -2.046 | -1.383 | 0.282  | -0.378 | 0.661  |
| -2.584 | -2.770 | -0.421 | -0.428 | 0.007  |
| -1.170 | -0.522 | -0.071 | -0.490 | 0.419  |
| -1.701 | -0.845 | 0.292  | -0.134 | 0.426  |
| -1.333 | -0.467 | 0.220  | 0.006  | 0.214  |
| -0.883 | -1.223 | 0.115  | -0.043 | 0.159  |
| 0.907  | 1.078  | 0.412  | 1.012  | -0.601 |
| -0.310 | -0.862 | 0.096  | 0.839  | -0.742 |
| -2.605 | -2.547 | 0.371  | 0.013  | 0.358  |
| 0.315  | -0.198 | 0.131  | 0.159  | -0.028 |
| 0.566  | 0.120  | 0.997  | 0.961  | 0.036  |
| -0.621 | -0.710 | 0.637  | 0.014  | 0.623  |
| 0.549  | 1.283  | 0.373  | 0.148  | 0.225  |
| -1.488 | -0.692 | 0.364  | -0.052 | 0.416  |
| -3.138 | -2.029 | 0.162  | -0.269 | 0.431  |
| -2.034 | -1.990 | 0.053  | -0.884 | 0.937  |
| -3.363 | -3.635 | -0.262 | 0.402  | -0.664 |
| 2.411  | 1.734  | 0.223  | -0.023 | 0.246  |
| -0.773 | -0.161 | 0.283  | -0.521 | 0.804  |
| 2.845  | 1.914  | -0.254 | -0.192 | -0.063 |
| 3.328  | 2.252  | 0.273  | 0.183  | 0.090  |
| -2.096 | -1.883 | 0.139  | -0.505 | 0.644  |
| 0.261  | 0.378  | -0.012 | -0.248 | 0.236  |
| -0.191 | -0.742 | 0.174  | 0.842  | -0.668 |
| -0.615 | -0.167 | -0.021 | -0.405 | 0.384  |
| 0.659  | 0.740  | 0.369  | -0.252 | 0.622  |
| 2.231  | 2.095  | 0.091  | 0.778  | -0.687 |
| -0.386 | -0.088 | -0.614 | -0.824 | 0.210  |
| -0.826 | -1.459 | -0.017 | 0.024  | -0.041 |
| 0.107  | 0.095  | 0.072  | -0.265 | 0.338  |
| 1.628  | 0.632  | 0.498  | 0.159  | 0.338  |
| 0.915  | 0.682  | 0.164  | 0.118  | 0.046  |
| -0.382 | 0.018  | 0.051  | -0.256 | 0.307  |
| 1.153  | 0.682  | -0.184 | -0.069 | -0.114 |
| -1.400 | -1.659 | 0.104  | -0.307 | 0.410  |
| -1.024 | -1.592 | 0.178  | 0.065  | 0.113  |
| 1.408  | 1.542  | -0.517 | -0.057 | -0.460 |
| 0.616  | 0.552  | 0.445  | 0.124  | 0.321  |
| -2.645 | -2.541 | 0.071  | -0.108 | 0.179  |
| -1.068 | -0.426 | -0.117 | -0.447 | 0.330  |

|        |        |        |        |        |
|--------|--------|--------|--------|--------|
| -1.565 | -1.712 | -0.169 | -0.773 | 0.604  |
| -0.270 | -0.813 | 0.333  | -0.019 | 0.353  |
| 0.409  | 0.877  | -0.545 | 0.014  | -0.559 |
| -0.837 | -0.618 | -0.047 | -0.714 | 0.668  |
| -2.657 | -1.309 | 0.012  | -0.583 | 0.595  |
| -1.568 | -1.609 | 0.055  | 0.051  | 0.004  |
| 0.439  | 0.609  | -0.339 | -0.416 | 0.077  |
| -2.711 | -2.274 | 0.329  | -0.123 | 0.452  |
| -2.333 | -1.643 | -0.017 | -1.046 | 1.029  |
| -1.092 | -0.993 | -0.070 | -0.081 | 0.010  |
| -1.003 | -0.749 | -0.435 | -0.662 | 0.227  |
| -0.106 | -1.643 | 0.261  | 0.522  | -0.261 |
| 0.006  | 0.219  | -0.190 | -0.137 | -0.053 |
| -0.498 | 0.056  | -0.062 | 0.197  | -0.260 |
| 1.013  | 0.295  | -0.468 | -0.520 | 0.051  |
| -0.243 | -0.038 | -0.200 | -0.558 | 0.358  |
| 1.492  | 0.308  | -0.398 | 0.137  | -0.535 |
| -2.124 | -1.325 | -0.356 | -0.770 | 0.414  |
| 0.739  | 0.010  | -1.338 | -0.814 | -0.523 |
| 2.454  | 2.005  | -1.217 | -0.315 | -0.902 |
| -2.104 | -1.823 | -0.441 | 0.328  | -0.769 |
| -0.831 | -0.990 | 0.067  | -0.245 | 0.312  |
| -2.253 | -1.007 | 0.027  | -0.778 | 0.805  |
| -2.489 | -2.259 | 0.215  | 0.807  | -0.592 |
| -1.543 | -0.801 | 0.079  | 0.138  | -0.058 |
| -0.913 | -1.986 | -0.010 | 0.140  | -0.150 |
| -1.832 | -1.494 | 0.203  | 0.889  | -0.685 |
| -0.081 | 0.582  | 0.106  | -0.317 | 0.423  |
| -0.147 | -0.363 | -0.965 | -0.820 | -0.146 |
| 0.459  | 0.781  | 0.171  | 0.494  | -0.324 |
| -1.895 | -1.407 | 0.466  | -0.929 | 1.395  |
| -0.604 | -0.349 | 0.440  | -0.114 | 0.553  |
| -0.933 | -1.598 | 1.145  | 0.662  | 0.483  |
| -0.691 | -0.551 | -0.421 | 0.223  | -0.644 |
| -0.830 | -2.067 | 0.373  | 0.384  | -0.011 |
| 1.094  | 0.689  | 1.283  | 0.519  | 0.765  |
| -2.666 | -1.320 | -1.999 | -1.839 | -0.159 |
| -2.165 | -1.461 | 0.078  | -0.631 | 0.709  |
| 0.228  | 0.390  | -0.899 | -0.233 | -0.666 |
| -1.720 | -1.537 | -0.287 | -0.520 | 0.233  |
| 0.457  | 0.808  | 0.232  | 0.015  | 0.216  |
| 0.788  | 0.975  | 0.122  | -0.255 | 0.377  |
| 0.519  | 0.655  | -0.629 | -0.678 | 0.049  |
| 1.480  | -0.027 | -0.132 | 0.052  | -0.184 |
| -0.234 | -0.303 | -0.091 | -0.118 | 0.027  |
| 1.166  | 0.681  | 0.679  | 1.107  | -0.427 |
| -0.045 | -0.063 | 0.203  | 0.133  | 0.071  |
| -2.716 | -2.242 | -0.415 | -0.594 | 0.180  |
| 2.404  | 1.461  | 0.014  | 0.680  | -0.665 |
| 1.301  | 0.344  | 0.181  | 0.328  | -0.147 |
| 1.546  | 1.232  | 0.144  | 0.211  | -0.068 |

|        |        |        |        |        |
|--------|--------|--------|--------|--------|
| 0.408  | 0.018  | -0.189 | -0.126 | -0.062 |
| -1.662 | -0.290 | -0.104 | -0.034 | -0.069 |
| 0.953  | 1.457  | 0.341  | 0.176  | 0.165  |
| 0.314  | 1.454  | -0.069 | -0.054 | -0.015 |
| 0.719  | 0.708  | 0.427  | 0.163  | 0.264  |
| 1.165  | 1.849  | 0.165  | 0.021  | 0.144  |
| -1.705 | -1.115 | -0.121 | 0.019  | -0.140 |
| -1.863 | -2.135 | -1.533 | -0.513 | -1.020 |
| 0.730  | 0.887  | 0.689  | 0.320  | 0.369  |
| 0.336  | 0.475  | 0.168  | -0.508 | 0.676  |
| 1.023  | 0.820  | -0.045 | -0.803 | 0.758  |
| -1.767 | -0.668 | 0.157  | -0.161 | 0.317  |
| -0.058 | 0.132  | 0.255  | 0.134  | 0.121  |
| -0.701 | -1.178 | 0.053  | 0.418  | -0.365 |
| -1.624 | -1.147 | 0.107  | -0.189 | 0.297  |
| 0.192  | -0.499 | 0.214  | 0.191  | 0.023  |
| -1.717 | -1.202 | -0.193 | -0.106 | -0.087 |
| -2.574 | -3.069 | 0.554  | 0.527  | 0.027  |
| 2.399  | 1.280  | 0.144  | 0.270  | -0.126 |
| 1.684  | 1.088  | 0.082  | -0.071 | 0.153  |
| 1.160  | 1.433  | 0.092  | -0.018 | 0.110  |
| 0.320  | 0.065  | 0.252  | 0.157  | 0.094  |
| -1.344 | -1.402 | 0.004  | 0.091  | -0.087 |
| -1.984 | -1.313 | -0.182 | 0.057  | -0.239 |
| -0.634 | -0.235 | 0.032  | 0.175  | -0.143 |
| -0.696 | -0.719 | -0.088 | 0.043  | -0.131 |
| 1.472  | 1.227  | 0.516  | 0.162  | 0.354  |
| 1.716  | 0.693  | -0.158 | -0.102 | -0.056 |
| -1.251 | -1.183 | -0.361 | -0.531 | 0.170  |
| -1.288 | -1.694 | -0.035 | 0.172  | -0.207 |
| -0.898 | -1.140 | 0.295  | 0.487  | -0.192 |
| -2.261 | -2.594 | 0.170  | 0.469  | -0.299 |
| -0.355 | 0.616  | -0.048 | 0.461  | -0.509 |
| -0.128 | 0.185  | 0.203  | -0.222 | 0.426  |
| -1.265 | -1.120 | 0.118  | -0.041 | 0.159  |
| -3.363 | -3.262 | -0.033 | 0.739  | -0.772 |
| -2.000 | -1.638 | -0.034 | 0.101  | -0.135 |
| -2.790 | -2.000 | -0.404 | -0.368 | -0.037 |
| -2.882 | -2.610 | -0.167 | -0.315 | 0.149  |
| -1.700 | -1.525 | 0.145  | -0.111 | 0.255  |
| -1.668 | -0.882 | 0.040  | 0.958  | -0.918 |
| -2.561 | -2.097 | -0.164 | -0.437 | 0.273  |
| -0.352 | -0.494 | 0.054  | -0.293 | 0.347  |
| -1.533 | -1.616 | 0.102  | -0.219 | 0.321  |
| -0.970 | -0.801 | -0.270 | -0.325 | 0.056  |
| -1.530 | -1.465 | 0.191  | 0.000  | 0.192  |
| -1.074 | -1.357 | 0.005  | 0.670  | -0.665 |
| -0.844 | -1.929 | 0.183  | 0.606  | -0.423 |
| -2.650 | -0.589 | -0.494 | -0.585 | 0.091  |
| -0.852 | -1.247 | 0.286  | -0.406 | 0.692  |
| -1.165 | -0.686 | -0.454 | -0.914 | 0.461  |

|        |        |        |        |        |
|--------|--------|--------|--------|--------|
| -1.690 | -1.855 | -0.812 | -0.332 | -0.480 |
| -0.784 | -0.598 | 0.238  | 0.083  | 0.155  |
| 0.080  | 0.655  | 0.368  | 0.686  | -0.318 |
| -1.075 | -1.669 | 0.227  | 0.244  | -0.017 |
| -0.417 | -0.231 | -0.085 | 0.248  | -0.333 |
| -2.281 | -1.956 | -0.199 | 0.199  | -0.398 |
| -0.201 | -1.034 | 0.027  | 0.337  | -0.310 |
| -3.252 | -3.133 | -0.237 | -0.093 | -0.145 |
| -2.243 | -0.861 | 0.828  | 1.404  | -0.576 |
| -3.073 | -2.604 | -0.168 | -0.324 | 0.156  |
| 1.933  | 1.943  | 0.528  | 0.094  | 0.434  |
| -0.259 | 0.109  | 0.271  | 0.746  | -0.475 |
| 0.697  | 0.683  | -0.276 | -0.658 | 0.382  |
| 1.816  | 1.122  | 0.056  | 0.371  | -0.315 |
| 2.249  | 1.606  | 0.214  | 0.331  | -0.117 |
| 1.383  | 1.624  | -0.027 | -0.479 | 0.451  |
| 0.144  | 0.780  | -1.212 | -0.464 | -0.748 |
| 0.476  | 1.364  | -0.369 | -0.151 | -0.218 |
| -1.060 | -0.156 | -0.220 | -0.073 | -0.147 |
| 1.274  | 1.330  | -0.818 | -0.405 | -0.414 |
| 2.241  | 1.222  | -0.008 | -0.443 | 0.435  |
| 0.373  | 1.069  | -0.056 | -0.227 | 0.171  |
| -0.028 | -1.519 | -0.511 | -0.046 | -0.465 |
| -0.861 | -0.784 | 0.326  | -0.371 | 0.697  |
| 1.638  | 1.680  | -0.190 | -0.001 | -0.189 |
| 0.566  | 0.081  | -0.288 | -0.310 | 0.022  |
| 0.114  | -1.584 | -0.227 | 0.181  | -0.408 |
| -0.625 | -0.166 | 0.670  | -0.268 | 0.938  |
| -1.325 | -0.599 | 0.107  | -0.484 | 0.591  |
| -1.139 | -0.774 | -0.051 | -0.481 | 0.430  |
| -0.507 | -1.242 | -0.417 | -0.047 | -0.371 |
| 1.097  | 0.461  | -0.161 | 0.223  | -0.385 |
| 0.608  | 0.075  | -0.319 | -0.330 | 0.011  |
| 0.282  | -0.206 | -0.121 | -0.236 | 0.115  |
| 0.187  | 0.094  | 0.195  | 0.189  | 0.006  |
| -1.580 | -1.727 | -0.053 | -0.045 | -0.007 |
| -3.484 | -1.821 | -0.131 | -0.736 | 0.605  |
| 1.090  | 1.262  | 0.090  | -0.216 | 0.306  |
| -0.771 | -0.742 | 0.089  | -0.601 | 0.690  |
| 1.044  | 0.577  | 1.311  | 0.519  | 0.792  |
| -1.698 | -0.807 | -0.416 | -0.505 | 0.088  |
| -0.911 | -0.240 | 0.516  | -0.339 | 0.856  |
| 1.623  | 0.490  | 0.449  | 0.265  | 0.185  |
| -1.406 | -1.240 | -0.315 | 0.181  | -0.496 |
| -4.295 | -3.042 | -0.475 | -0.604 | 0.130  |
| 0.046  | -0.772 | -0.107 | 0.517  | -0.624 |
| -0.674 | -0.380 | -0.314 | -1.036 | 0.722  |
| -0.587 | -0.343 | 0.548  | -0.436 | 0.984  |
| 0.355  | 1.706  | 0.037  | 0.195  | -0.158 |
| -0.512 | -0.087 | 0.266  | -0.029 | 0.294  |
| -2.172 | -1.752 | -0.449 | 0.061  | -0.510 |

|        |        |        |        |        |
|--------|--------|--------|--------|--------|
| -1.685 | -0.164 | 0.363  | -0.121 | 0.483  |
| -1.843 | -1.218 | -0.094 | -0.303 | 0.209  |
| -2.617 | -2.315 | 0.234  | 0.159  | 0.075  |
| -0.866 | -0.845 | 0.025  | -0.270 | 0.296  |
| 0.304  | -0.144 | -0.286 | 0.256  | -0.542 |
| 0.218  | -0.336 | -0.189 | 0.317  | -0.506 |
| 0.913  | -0.079 | -0.413 | 0.098  | -0.511 |
| -2.411 | -1.958 | 0.749  | 0.216  | 0.533  |
| 1.726  | 1.200  | 0.012  | -0.033 | 0.045  |
| -0.158 | -0.404 | 0.266  | -0.022 | 0.288  |
| 0.431  | 0.876  | -0.742 | -0.625 | -0.116 |
| 1.297  | 0.294  | -0.321 | 0.159  | -0.481 |
| -2.535 | -1.984 | -0.006 | -0.256 | 0.250  |
| 1.175  | 1.778  | 0.260  | 0.342  | -0.082 |
| 0.427  | 1.113  | -0.092 | 0.052  | -0.144 |
| 0.669  | 0.622  | 0.386  | -0.240 | 0.625  |
| 0.512  | 0.261  | 0.354  | 0.139  | 0.215  |
| -0.422 | 0.486  | 0.326  | 0.070  | 0.256  |
| -1.768 | -1.733 | -0.057 | 0.316  | -0.374 |
| -0.773 | -0.721 | -0.062 | 0.585  | -0.647 |
| -0.531 | -0.097 | -0.160 | -0.128 | -0.031 |
| -2.153 | -1.814 | -0.224 | -0.470 | 0.245  |
| 0.775  | 0.216  | 0.682  | 0.093  | 0.589  |
| 0.232  | -0.494 | 0.754  | 0.497  | 0.256  |
| -2.123 | -1.475 | -0.140 | -0.663 | 0.523  |
| 1.889  | 0.541  | 0.100  | -0.010 | 0.110  |
| 1.150  | 0.228  | 0.446  | 0.282  | 0.164  |
| 1.282  | 1.126  | 0.067  | 0.039  | 0.027  |
| 1.442  | 0.869  | -0.176 | 0.087  | -0.264 |
| 1.112  | 1.749  | 0.036  | -0.151 | 0.187  |
| 1.470  | 1.666  | 0.950  | 0.564  | 0.385  |
| -1.432 | -1.167 | -0.259 | -0.351 | 0.092  |
| -2.286 | -1.473 | -0.439 | -0.645 | 0.206  |
| -0.284 | -0.079 | -0.326 | -0.573 | 0.247  |
| 2.164  | 1.728  | 0.193  | -0.054 | 0.247  |
| 1.651  | 0.999  | 0.373  | 0.040  | 0.332  |
| -2.084 | -1.076 | 0.068  | -0.416 | 0.484  |
| 1.209  | 1.487  | 0.147  | 0.012  | 0.135  |
| 1.176  | 1.415  | 0.534  | -0.602 | 1.136  |
| 1.530  | 1.547  | 0.146  | 0.387  | -0.241 |
| 0.201  | -0.210 | 0.034  | 0.588  | -0.554 |
| 0.062  | -0.858 | -0.127 | -0.269 | 0.142  |
| -1.262 | -0.893 | 0.232  | -0.027 | 0.259  |
| 0.132  | -0.893 | -0.557 | 0.138  | -0.695 |
| -0.958 | -0.564 | 0.488  | -0.598 | 1.086  |
| -0.814 | -0.128 | -0.145 | -0.289 | 0.144  |
| 0.998  | -0.541 | -0.074 | 0.334  | -0.408 |
| -0.495 | -0.112 | 0.113  | -0.142 | 0.255  |
| 0.645  | 0.077  | -0.247 | 0.360  | -0.607 |
| 0.322  | 0.660  | -0.046 | 0.029  | -0.075 |
| 1.322  | 0.306  | 0.348  | 0.372  | -0.024 |

|        |        |        |        |        |
|--------|--------|--------|--------|--------|
| 1.055  | 1.682  | 0.757  | 0.990  | -0.233 |
| -1.641 | -1.274 | 0.033  | -0.492 | 0.525  |
| -0.926 | -0.338 | -0.154 | -0.162 | 0.008  |
| 0.114  | 0.083  | 0.129  | 0.082  | 0.048  |
| 2.161  | 1.081  | 0.434  | 0.314  | 0.120  |
| 1.555  | 0.726  | -0.088 | 0.160  | -0.248 |
| 2.063  | 1.335  | 0.837  | 0.826  | 0.011  |
| 2.459  | 1.346  | 0.313  | 0.117  | 0.197  |
| 1.105  | 0.008  | 0.163  | -0.219 | 0.382  |
| -0.566 | -0.136 | -0.096 | -0.353 | 0.257  |
| -2.094 | -1.537 | -0.286 | 0.003  | -0.290 |
| -0.708 | -1.757 | -0.171 | 0.341  | -0.512 |
| -2.824 | -2.248 | 0.185  | -0.360 | 0.545  |
| -3.666 | -3.399 | -0.380 | -0.318 | -0.063 |
| 0.830  | -0.224 | 0.211  | -0.167 | 0.378  |
| 1.577  | 1.181  | -0.783 | -0.393 | -0.390 |
| -2.637 | -2.147 | -0.084 | -0.509 | 0.425  |
| -0.081 | 0.129  | -0.460 | -0.212 | -0.249 |
| -1.386 | -2.086 | -0.117 | -0.079 | -0.038 |
| 2.251  | 1.962  | -0.686 | 0.034  | -0.721 |
| 0.787  | 0.552  | -0.172 | 0.267  | -0.439 |
| 0.430  | -0.320 | -0.511 | 0.189  | -0.701 |
| -0.175 | -0.777 | -0.286 | -0.111 | -0.175 |
| 0.899  | -0.289 | -0.145 | -0.014 | -0.130 |
| -1.080 | -0.110 | -0.057 | 0.172  | -0.229 |
| -2.758 | -2.810 | -0.574 | -0.304 | -0.269 |
| 2.278  | 1.835  | 0.124  | 0.314  | -0.190 |
| -1.403 | -0.905 | 0.791  | -0.153 | 0.944  |
| -1.357 | -1.599 | 0.263  | 0.537  | -0.274 |
| -0.191 | -1.278 | 0.184  | 0.305  | -0.121 |
| -1.883 | -2.094 | 0.093  | 0.132  | -0.039 |
| -2.432 | -1.735 | 0.320  | 0.420  | -0.100 |
| 0.278  | 0.380  | -2.164 | 0.106  | -2.270 |
| -1.586 | -1.113 | -0.145 | -0.061 | -0.084 |
| -0.663 | -0.569 | -0.501 | -0.031 | -0.470 |
| 0.326  | -0.323 | -0.294 | -0.148 | -0.146 |
| 0.605  | 0.247  | 0.013  | 0.296  | -0.283 |
| 1.765  | 1.054  | 0.231  | 0.727  | -0.496 |
| -1.206 | -1.521 | 0.021  | -0.065 | 0.086  |
| -2.546 | -1.963 | -0.192 | -0.449 | 0.257  |
| 0.465  | -0.030 | -0.008 | -0.023 | 0.015  |
| -3.561 | -3.139 | -0.080 | -0.704 | 0.624  |
| 1.154  | -0.142 | -0.101 | -0.081 | -0.021 |
| 0.476  | 0.050  | 0.328  | 0.326  | 0.002  |
| 1.051  | 1.122  | -0.603 | -0.515 | -0.088 |
| 2.096  | 1.402  | -0.032 | -0.115 | 0.083  |
| -1.396 | -1.428 | 1.077  | 0.285  | 0.793  |
| 0.776  | 0.217  | 0.753  | 0.295  | 0.458  |
| 0.825  | 0.361  | 0.705  | -0.045 | 0.751  |
| 0.952  | 1.223  | 0.161  | 0.271  | -0.110 |
| -0.137 | -1.159 | 0.030  | -0.246 | 0.276  |



|        |        |        |        |        |
|--------|--------|--------|--------|--------|
| -0.629 | 0.069  | 0.452  | -0.586 | 1.038  |
| -1.657 | -0.482 | -0.349 | -0.861 | 0.513  |
| -1.194 | -0.255 | 0.451  | 0.477  | -0.026 |
| -2.661 | -2.167 | 0.289  | 0.832  | -0.543 |
| 1.150  | 0.905  | -0.205 | 0.191  | -0.396 |
| 0.101  | -0.274 | 0.118  | -0.063 | 0.181  |
| 1.344  | -0.119 | 0.082  | 0.302  | -0.220 |
| 0.742  | 0.298  | -0.231 | -0.331 | 0.100  |
| 0.239  | 0.713  | 0.052  | -0.213 | 0.265  |
| 0.967  | 0.127  | 0.152  | 0.296  | -0.144 |
| 0.730  | -0.708 | -1.488 | 0.074  | -1.562 |
| -0.329 | -1.441 | 0.060  | -0.003 | 0.064  |
| 1.134  | 0.249  | -0.041 | -0.018 | -0.024 |
| 0.126  | 0.524  | 0.182  | 0.104  | 0.078  |
| 2.829  | 1.944  | 0.359  | 0.089  | 0.271  |
| 1.401  | 1.106  | 1.036  | 0.785  | 0.251  |
| -2.107 | -1.912 | -0.354 | -0.720 | 0.366  |
| -1.135 | -0.965 | -0.033 | 0.180  | -0.213 |
| 0.991  | 1.089  | 0.194  | -0.078 | 0.272  |
| -1.596 | -1.237 | -0.014 | 0.234  | -0.248 |
| 0.476  | 0.790  | 0.091  | -0.221 | 0.312  |
| -2.900 | -2.385 | -0.178 | -0.425 | 0.247  |
| 1.810  | 1.832  | 0.113  | -0.757 | 0.869  |
| -1.742 | -1.211 | 0.049  | -0.327 | 0.376  |
| -2.193 | -2.089 | 0.070  | -0.309 | 0.379  |
| -2.340 | -2.226 | 0.138  | 0.170  | -0.032 |
| 2.090  | 2.685  | -0.160 | 0.170  | -0.330 |
| 1.663  | 1.345  | -0.080 | 0.444  | -0.524 |
| 2.442  | 1.536  | -0.090 | 0.263  | -0.353 |
| 2.002  | 1.836  | 0.160  | 0.135  | 0.025  |
| -1.244 | -1.488 | -0.012 | -0.182 | 0.170  |
| 1.517  | 0.760  | 0.220  | 0.233  | -0.014 |
| -0.751 | -0.703 | 0.216  | 0.144  | 0.072  |
| -1.557 | -1.796 | 0.200  | 0.270  | -0.070 |
| -0.460 | -0.112 | -0.223 | 0.244  | -0.467 |
| -0.640 | -0.517 | -0.845 | -0.270 | -0.575 |
| -2.174 | -1.597 | 0.403  | -0.893 | 1.295  |
| 2.962  | 2.177  | -0.173 | 0.260  | -0.433 |
| 0.249  | 0.037  | 0.418  | -0.208 | 0.626  |
| -0.091 | -0.319 | 0.712  | 0.591  | 0.121  |
| -2.447 | -1.844 | -1.273 | -0.391 | -0.882 |
| 2.462  | 3.622  | 0.291  | -0.432 | 0.723  |
| -2.538 | -2.463 | -0.336 | -0.019 | -0.317 |
| -2.470 | -1.945 | -0.566 | -0.199 | -0.366 |
| -2.303 | -1.893 | -0.297 | -0.798 | 0.501  |
| -0.837 | -1.042 | -0.357 | -0.171 | -0.186 |
| 1.850  | 1.412  | -0.106 | -0.035 | -0.071 |
| -2.121 | -1.806 | -0.037 | -0.490 | 0.453  |
| 0.744  | 0.753  | 0.630  | 0.205  | 0.426  |
| -1.740 | -1.456 | -0.564 | -0.461 | -0.103 |
| -1.874 | -0.074 | 0.834  | 0.147  | 0.687  |

|        |        |        |        |        |
|--------|--------|--------|--------|--------|
| -2.167 | -1.737 | 0.064  | 0.096  | -0.033 |
| 0.876  | 1.907  | 0.133  | -1.213 | 1.346  |
| 0.065  | 0.796  | -0.317 | -0.980 | 0.663  |
| -0.215 | 0.191  | 0.062  | -0.500 | 0.562  |
| -0.564 | -0.222 | 0.167  | -0.418 | 0.585  |
| 1.103  | -0.008 | 0.149  | -0.082 | 0.231  |
| -0.313 | -0.132 | 0.915  | 0.479  | 0.436  |
| 1.900  | 2.351  | 0.225  | -0.136 | 0.361  |
| -1.479 | -1.075 | 0.567  | -0.086 | 0.653  |
| 1.733  | 1.119  | 0.333  | 0.270  | 0.063  |
| 1.916  | 1.342  | -0.991 | -0.692 | -0.299 |
| 1.772  | 1.426  | 0.178  | 0.097  | 0.082  |
| 2.486  | 1.480  | 0.320  | -0.317 | 0.637  |
| 1.651  | 1.711  | -0.312 | -0.572 | 0.260  |
| 0.580  | 1.008  | 0.025  | -0.422 | 0.447  |
| 1.040  | 1.408  | -0.722 | -0.348 | -0.374 |
| 1.412  | 1.807  | 0.604  | -0.788 | 1.392  |
| 2.658  | 2.387  | -0.085 | -0.275 | 0.190  |
| 2.314  | 1.388  | 0.177  | -0.326 | 0.504  |
| 0.878  | 0.827  | 0.627  | 1.093  | -0.465 |
| -0.357 | -0.150 | -0.348 | -0.429 | 0.081  |
| -0.182 | -1.080 | -0.266 | -0.373 | 0.107  |
| 1.946  | 1.311  | -0.243 | 0.668  | -0.911 |
| 0.573  | -0.345 | -0.964 | -0.516 | -0.448 |
| -1.367 | -1.103 | -0.560 | -0.147 | -0.414 |
| 2.321  | 1.277  | 0.063  | 0.241  | -0.178 |
| 1.018  | 1.042  | -0.010 | -0.293 | 0.283  |
| -0.349 | -0.504 | 0.189  | -0.250 | 0.439  |
| 0.568  | -0.087 | -0.310 | -0.293 | -0.018 |
| 2.063  | 1.507  | 0.007  | -0.005 | 0.012  |
| 0.744  | 0.305  | 0.222  | 0.147  | 0.075  |
| 2.076  | 1.969  | -0.155 | 0.005  | -0.160 |
| -1.034 | -0.618 | -0.186 | -0.198 | 0.012  |
| -2.739 | -1.963 | 0.030  | -0.877 | 0.907  |
| 0.397  | -0.451 | -0.394 | 0.004  | -0.398 |
| 0.298  | 1.401  | -0.391 | -0.464 | 0.074  |
| -0.156 | 2.389  | -0.131 | -0.290 | 0.159  |
| 1.308  | 2.015  | -0.379 | 0.037  | -0.416 |
| 0.083  | -0.517 | 0.407  | 0.759  | -0.352 |
| -0.625 | -0.020 | 0.525  | 0.269  | 0.256  |
| 0.258  | 0.624  | -0.215 | -0.759 | 0.543  |
| 0.399  | 0.614  | 0.269  | -0.316 | 0.585  |
| 1.781  | 0.677  | 0.504  | 0.180  | 0.325  |
| 0.177  | 0.256  | -0.401 | -0.644 | 0.242  |
| 1.450  | 0.430  | 0.942  | 0.302  | 0.640  |
| -0.734 | -0.888 | 0.628  | 0.711  | -0.082 |
| 1.841  | 1.154  | 0.463  | 0.192  | 0.271  |
| -0.792 | -0.611 | 0.088  | 0.204  | -0.116 |
| 1.728  | 1.239  | 0.052  | -0.035 | 0.087  |
| 1.207  | 1.181  | -2.327 | -0.107 | -2.220 |
| 1.846  | 0.774  | -0.486 | 0.106  | -0.592 |

|        |        |        |        |        |
|--------|--------|--------|--------|--------|
| -0.159 | 0.624  | 0.071  | -0.444 | 0.515  |
| -0.146 | -0.427 | 0.711  | 0.599  | 0.113  |
| -2.687 | -2.474 | 0.038  | -0.303 | 0.341  |
| -2.150 | -1.837 | -0.328 | 0.236  | -0.564 |
| 0.863  | 1.774  | -0.062 | 0.012  | -0.074 |
| -1.183 | -0.843 | -0.060 | 0.221  | -0.281 |
| 1.282  | 0.107  | 0.495  | 0.493  | 0.002  |
| -0.351 | -1.416 | 0.222  | -0.067 | 0.289  |
| -1.496 | -0.653 | 0.049  | -1.558 | 1.606  |
| 0.738  | 0.753  | 0.457  | 0.257  | 0.200  |
| 0.844  | 0.617  | -0.101 | -0.492 | 0.391  |
| -1.338 | -1.910 | 0.199  | 0.401  | -0.202 |
| 2.322  | 1.608  | 0.050  | 0.378  | -0.328 |
| 0.194  | 0.652  | -0.531 | -0.171 | -0.360 |
| -1.623 | -1.711 | -0.054 | -0.087 | 0.033  |
| 1.209  | -0.226 | 0.486  | 0.437  | 0.049  |
| -0.412 | -0.287 | 0.185  | -0.129 | 0.315  |
| -1.183 | -1.857 | -0.402 | -0.539 | 0.137  |
| 0.014  | 0.883  | -0.075 | -0.377 | 0.302  |
| -2.121 | -0.897 | 0.639  | -0.400 | 1.039  |
| -1.135 | -1.682 | -0.045 | 0.975  | -1.020 |
| 1.325  | 0.573  | 0.163  | 0.504  | -0.341 |
| -1.903 | -1.697 | -0.128 | 0.094  | -0.222 |
| 0.183  | 0.666  | 0.181  | 0.043  | 0.138  |
| 0.338  | 0.858  | 0.371  | -0.187 | 0.559  |
| -2.063 | -1.694 | -0.204 | -0.765 | 0.561  |
| -2.447 | -2.106 | 0.907  | -0.199 | 1.106  |
| 0.436  | -0.951 | 0.249  | 0.223  | 0.026  |
| 1.642  | 1.342  | 0.289  | 0.009  | 0.279  |
| -2.094 | -2.417 | -0.076 | 0.037  | -0.113 |
| -0.899 | -1.196 | 0.263  | 0.237  | 0.026  |
| -1.320 | -0.445 | 0.332  | 0.382  | -0.051 |
| 2.215  | 0.519  | 0.166  | 0.211  | -0.044 |
| 2.695  | 1.610  | 0.083  | 0.483  | -0.400 |
| 1.868  | 1.106  | 0.186  | 0.269  | -0.083 |
| 1.405  | 2.151  | -0.163 | -0.669 | 0.506  |
| 1.989  | 1.086  | 0.129  | -0.274 | 0.402  |
| -1.142 | -1.408 | 0.576  | 0.267  | 0.309  |
| 0.350  | 0.483  | 0.532  | 0.475  | 0.056  |
| -1.274 | -0.775 | -0.073 | -0.209 | 0.136  |
| 1.233  | 1.100  | 0.474  | 0.531  | -0.057 |
| -0.216 | -0.181 | -1.422 | -1.068 | -0.354 |
| -2.025 | -1.970 | 0.072  | -0.083 | 0.155  |
| 2.232  | 1.003  | 1.209  | 0.817  | 0.392  |
| -1.620 | -1.062 | -0.617 | -0.312 | -0.306 |
| -1.585 | -1.290 | 0.276  | 0.158  | 0.118  |
| 0.512  | 0.199  | 0.461  | 0.963  | -0.502 |
| 2.194  | 2.220  | 0.425  | 0.539  | -0.114 |
| -1.996 | -1.743 | 0.582  | -0.133 | 0.715  |
| 0.646  | 0.977  | -0.056 | -0.004 | -0.052 |
| 1.830  | 0.407  | 0.503  | 0.909  | -0.406 |

|        |        |        |        |        |
|--------|--------|--------|--------|--------|
| -1.576 | -1.000 | -0.159 | -0.372 | 0.214  |
| -1.558 | -1.688 | -0.254 | 0.643  | -0.897 |
| 0.586  | 1.010  | 0.057  | 0.290  | -0.233 |
| 0.957  | 0.442  | 0.200  | 0.021  | 0.179  |
| 0.999  | 1.734  | -0.424 | -0.542 | 0.118  |
| 2.585  | 1.436  | 0.296  | 0.515  | -0.218 |
| 2.480  | 2.695  | -0.340 | -0.312 | -0.028 |
| 3.115  | 2.428  | -0.137 | -0.301 | 0.164  |
| -1.077 | -1.770 | -0.055 | 0.349  | -0.404 |
| -2.132 | -2.695 | 0.294  | 0.291  | 0.003  |
| -2.805 | 0.360  | 0.303  | 0.145  | 0.158  |
| 0.984  | 1.816  | 0.279  | 0.409  | -0.130 |
| 0.252  | 0.212  | 0.261  | -0.239 | 0.501  |
| 0.744  | 0.917  | 0.335  | -0.028 | 0.363  |
| 0.995  | 0.712  | 0.294  | 0.418  | -0.124 |
| -1.001 | -0.823 | -0.351 | -0.298 | -0.054 |
| 0.636  | 0.630  | 0.253  | -0.086 | 0.339  |
| 2.025  | 2.381  | -0.271 | -0.334 | 0.063  |
| 0.479  | 0.912  | 0.503  | -0.203 | 0.706  |
| -0.320 | -1.521 | -0.618 | 0.660  | -1.278 |
| 0.081  | 0.664  | 0.140  | 0.031  | 0.110  |
| 0.948  | 0.391  | 0.695  | 0.542  | 0.152  |
| -1.161 | -1.108 | -0.110 | 0.294  | -0.404 |
| -3.117 | -1.162 | -0.307 | -0.709 | 0.402  |
| 2.336  | 1.917  | 0.646  | 0.285  | 0.361  |
| -0.654 | -0.721 | -0.960 | -0.402 | -0.558 |
| -0.721 | -0.388 | -1.502 | 0.045  | -1.547 |
| 0.666  | -0.534 | -0.851 | -0.265 | -0.587 |
| -0.722 | -0.694 | -0.087 | -0.212 | 0.125  |
| -0.765 | -1.618 | 0.060  | -0.510 | 0.570  |
| -1.632 | -2.063 | 0.479  | 0.059  | 0.420  |
| 1.280  | 1.676  | 0.040  | -0.132 | 0.172  |
| 0.276  | -0.587 | 0.312  | 0.087  | 0.225  |
| -1.317 | -1.165 | 0.415  | -0.081 | 0.496  |
| -1.622 | -1.739 | 0.018  | 0.092  | -0.073 |
| 2.547  | 2.277  | 0.488  | 0.126  | 0.362  |
| 1.908  | 2.253  | -0.032 | 0.111  | -0.144 |
| 0.846  | 1.595  | 0.306  | 0.124  | 0.182  |
| 1.342  | 1.054  | -0.194 | -0.606 | 0.412  |
| -0.320 | 0.356  | 0.169  | -0.576 | 0.745  |
| 0.453  | -0.305 | 0.025  | 0.269  | -0.244 |
| 0.970  | -0.298 | 0.229  | 0.679  | -0.449 |
| -0.763 | -1.582 | 0.491  | 0.562  | -0.071 |
| -2.967 | -2.611 | 0.228  | -0.229 | 0.457  |
| -3.506 | -2.998 | -0.109 | -0.545 | 0.435  |
| -1.350 | -1.370 | -1.260 | -0.140 | -1.120 |
| -2.834 | -2.802 | 0.233  | 0.197  | 0.036  |
| -1.846 | -1.388 | -0.365 | -0.724 | 0.358  |
| 1.604  | 0.836  | 0.021  | -0.096 | 0.117  |
| -0.218 | -0.110 | 0.429  | -0.235 | 0.664  |
| 2.123  | 0.522  | 0.512  | 0.642  | -0.130 |

|        |        |        |        |        |
|--------|--------|--------|--------|--------|
| 0.724  | 0.560  | 0.365  | -0.099 | 0.464  |
| 0.762  | 0.048  | 0.128  | 0.433  | -0.305 |
| -0.269 | -0.245 | 0.071  | -0.337 | 0.408  |
| -1.798 | -1.636 | 0.301  | -0.165 | 0.465  |
| 0.610  | 0.069  | -0.075 | 0.225  | -0.300 |
| 0.606  | -0.218 | 0.494  | 0.002  | 0.491  |
| 1.567  | 0.735  | 0.482  | 0.721  | -0.239 |
| 0.415  | -0.577 | 0.266  | 0.479  | -0.212 |
| -0.112 | 0.100  | 0.360  | -0.256 | 0.616  |
| 1.066  | 0.664  | -0.013 | -0.520 | 0.507  |
| 1.251  | 0.983  | 0.254  | -0.076 | 0.330  |
| -2.505 | -1.847 | -0.118 | -0.283 | 0.165  |
| -1.823 | -2.051 | 0.137  | 0.155  | -0.018 |
| -0.273 | -0.722 | 0.194  | 0.152  | 0.042  |
| -1.036 | -0.316 | 0.459  | 0.278  | 0.181  |
| -2.553 | -2.261 | 0.087  | -0.276 | 0.363  |
| 1.994  | 1.303  | 0.211  | 0.726  | -0.515 |
| 2.530  | 1.613  | 0.289  | 0.848  | -0.559 |
| 2.796  | 2.187  | 0.207  | 0.001  | 0.206  |
| 2.869  | 2.117  | -0.083 | 0.640  | -0.723 |
| -4.060 | -3.485 | -0.306 | -0.002 | -0.305 |
| -0.870 | -0.583 | 0.868  | 0.151  | 0.716  |
| -3.373 | -2.006 | -0.156 | -0.597 | 0.440  |
| 0.063  | 0.102  | 0.484  | -0.185 | 0.669  |
| -1.875 | 0.161  | -0.182 | -0.034 | -0.148 |
| 0.110  | 0.645  | -0.796 | 0.181  | -0.977 |
| -0.499 | 0.136  | -0.124 | -0.475 | 0.351  |
| 1.138  | 0.812  | -0.174 | 0.933  | -1.107 |
| -1.207 | 0.603  | 0.219  | 0.097  | 0.122  |
| -1.239 | 0.243  | -0.505 | -1.043 | 0.537  |
| 1.298  | 1.424  | 0.321  | -0.488 | 0.809  |
| 2.920  | 2.595  | 0.533  | -1.025 | 1.558  |
| 0.032  | 0.483  | 0.026  | -1.459 | 1.485  |
| -0.356 | 0.688  | -0.826 | -1.329 | 0.503  |
| 1.057  | -0.058 | 0.363  | 0.018  | 0.345  |
| 0.780  | 1.034  | 0.277  | 0.134  | 0.143  |
| 0.368  | 0.966  | -0.256 | -0.695 | 0.438  |
| 0.031  | -0.018 | 1.058  | -0.017 | 1.076  |
| -0.216 | -0.238 | -0.005 | -0.311 | 0.306  |
| 2.811  | 1.270  | 0.312  | 0.166  | 0.146  |
| 3.154  | 2.015  | -0.249 | -0.153 | -0.097 |
| 2.844  | 1.963  | 0.435  | -0.010 | 0.444  |
| -2.013 | -1.648 | 0.389  | -0.591 | 0.981  |
| 1.908  | 2.046  | 0.252  | -0.054 | 0.306  |
| 0.501  | 0.208  | 0.063  | 0.480  | -0.416 |
| 0.811  | 1.265  | 0.317  | -0.351 | 0.668  |
| 0.747  | 0.894  | -0.436 | -0.483 | 0.047  |
| -1.355 | -0.861 | -0.284 | -0.706 | 0.422  |
| 1.010  | 0.533  | 0.188  | -0.023 | 0.211  |
| -0.112 | -0.543 | 0.409  | -0.256 | 0.665  |
| 2.162  | 0.980  | 0.278  | 0.255  | 0.022  |

|        |        |        |        |        |
|--------|--------|--------|--------|--------|
| 0.566  | -0.747 | 0.205  | 0.092  | 0.113  |
| 2.515  | 1.949  | 0.103  | 0.395  | -0.292 |
| 1.714  | 1.875  | -0.180 | -0.399 | 0.219  |
| 2.019  | 0.962  | 0.227  | 0.048  | 0.179  |
| 2.626  | 2.723  | 0.384  | 0.660  | -0.276 |
| 0.863  | 0.250  | -0.057 | -0.149 | 0.092  |
| 0.041  | -0.651 | 0.235  | 0.309  | -0.074 |
| -0.099 | 0.136  | 0.011  | 0.096  | -0.085 |
| 2.554  | 2.092  | 0.399  | -0.171 | 0.570  |
| -1.374 | -1.070 | 0.240  | -0.067 | 0.307  |
| 1.231  | 0.565  | 0.451  | 0.244  | 0.207  |
| 2.194  | 2.583  | -0.465 | -0.563 | 0.099  |
| 1.771  | 0.881  | 0.377  | -0.147 | 0.524  |
| -0.645 | -1.041 | -0.256 | -0.204 | -0.051 |
| 0.488  | -0.001 | -0.121 | -0.415 | 0.294  |
| -1.570 | -1.861 | 0.666  | -0.210 | 0.876  |
| 0.833  | 0.136  | 0.075  | -0.053 | 0.128  |
| 1.908  | 1.320  | 0.237  | -0.138 | 0.375  |
| -1.631 | -0.995 | -0.293 | 0.037  | -0.330 |
| -0.152 | 0.266  | 0.082  | -0.609 | 0.691  |
| 1.974  | 1.386  | 0.530  | 0.218  | 0.312  |
| -0.864 | -0.728 | -0.344 | -0.539 | 0.194  |
| -1.506 | -1.118 | 1.194  | -0.225 | 1.419  |
| -2.621 | -2.960 | -0.694 | 0.299  | -0.993 |
| -2.307 | -1.657 | -0.644 | -0.975 | 0.331  |
| -0.784 | -1.795 | 0.402  | 0.224  | 0.178  |
| -0.741 | -0.540 | 0.415  | 0.298  | 0.117  |
| 0.952  | 0.594  | -0.002 | -0.134 | 0.131  |
| -1.434 | -1.101 | 0.458  | -0.041 | 0.499  |
| -2.276 | -1.969 | 0.439  | 0.635  | -0.195 |
| -0.742 | -1.010 | 0.348  | -0.052 | 0.400  |
| -1.195 | -0.624 | 0.075  | -0.599 | 0.675  |
| 2.436  | 1.826  | 0.081  | -0.617 | 0.698  |
| -1.248 | -0.991 | 0.391  | -0.273 | 0.664  |
| 0.273  | -0.616 | -0.082 | -0.067 | -0.015 |
| 2.135  | 2.634  | -0.289 | 0.083  | -0.372 |
| 4.786  | 2.562  | 0.628  | -0.090 | 0.718  |
| 3.619  | 2.150  | 0.467  | 0.327  | 0.140  |
| 2.137  | 2.134  | 0.545  | 0.744  | -0.198 |
| -0.296 | -1.374 | 0.398  | 0.412  | -0.014 |
| 0.749  | 0.277  | -0.552 | -0.109 | -0.443 |
| -0.146 | -0.952 | -0.703 | -0.196 | -0.507 |
| -0.554 | -0.936 | 0.222  | -0.456 | 0.678  |
| -0.727 | 0.427  | 0.045  | -0.622 | 0.667  |
| 1.227  | 0.327  | 0.289  | 0.692  | -0.403 |
| 2.546  | 2.364  | 0.160  | 0.279  | -0.119 |
| 0.643  | -0.552 | 0.198  | 0.099  | 0.099  |
| 2.162  | 2.018  | -0.871 | -0.245 | -0.626 |
| -0.506 | -0.275 | -0.656 | -0.339 | -0.317 |
| -0.922 | -1.049 | 0.628  | 0.197  | 0.431  |
| -1.270 | -2.081 | -0.027 | -0.178 | 0.151  |

|        |        |        |        |        |
|--------|--------|--------|--------|--------|
| -0.141 | 0.118  | -0.321 | -0.620 | 0.299  |
| -2.053 | -1.682 | -0.222 | -0.586 | 0.365  |
| -1.396 | 0.010  | 0.047  | -0.367 | 0.414  |
| -1.785 | -1.621 | -0.068 | 0.053  | -0.121 |
| 1.558  | 1.552  | 0.057  | 0.299  | -0.242 |
| -0.801 | 0.020  | 0.070  | 0.141  | -0.071 |
| -1.352 | -1.259 | -0.315 | -0.397 | 0.082  |
| -2.158 | -0.447 | -0.370 | -0.953 | 0.583  |
| -1.293 | -0.925 | -0.492 | -0.634 | 0.142  |
| -0.119 | 0.347  | -0.122 | -0.520 | 0.398  |
| -1.381 | -1.020 | 0.298  | -0.432 | 0.730  |
| 0.088  | 0.133  | 0.120  | -0.023 | 0.143  |
| 2.113  | 1.790  | 0.359  | -0.131 | 0.490  |
| 2.580  | 2.057  | 0.560  | 0.343  | 0.217  |
| -2.332 | -1.120 | 0.159  | 0.134  | 0.025  |
| -2.855 | -2.323 | -0.023 | -0.394 | 0.371  |
| 2.302  | 1.698  | 0.210  | 0.249  | -0.039 |
| 0.645  | 1.243  | -0.263 | -0.734 | 0.470  |
| 2.992  | 2.809  | -0.283 | -0.592 | 0.309  |
| -0.404 | 0.092  | -0.349 | -0.244 | -0.105 |
| 0.518  | -0.519 | -0.174 | 0.126  | -0.300 |
| 0.062  | 0.342  | 0.467  | 0.437  | 0.029  |
| -4.068 | -2.709 | -0.697 | 0.212  | -0.909 |
| -3.333 | -1.732 | -0.047 | -0.268 | 0.221  |
| -4.194 | -3.527 | 0.291  | 0.012  | 0.279  |
| -2.772 | -1.371 | -0.247 | 0.375  | -0.622 |
| -0.681 | -0.827 | -0.290 | 0.147  | -0.437 |
| -1.239 | -1.163 | -0.501 | -0.288 | -0.213 |
| -2.764 | -1.895 | -0.144 | -0.379 | 0.235  |
| 0.025  | 0.030  | -0.957 | 0.214  | -1.171 |
| 1.880  | 2.213  | 0.617  | -0.027 | 0.644  |
| 0.816  | -0.711 | 0.160  | 0.317  | -0.157 |
| 0.685  | 0.917  | 0.444  | -0.238 | 0.682  |
| 1.043  | 1.029  | 0.002  | -0.202 | 0.204  |
| -0.948 | -0.509 | -0.155 | 0.036  | -0.191 |
| 0.253  | 0.977  | 1.511  | 0.193  | 1.317  |
| -1.155 | -1.021 | 0.038  | -0.086 | 0.124  |
| 0.741  | 0.888  | -0.192 | -0.695 | 0.503  |
| 1.011  | 0.634  | 0.482  | -0.733 | 1.215  |
| 1.903  | 1.560  | 0.400  | -0.286 | 0.686  |
| -0.331 | 0.031  | 0.344  | -0.459 | 0.803  |
| -0.271 | 0.076  | -0.221 | 0.871  | -1.092 |
| 0.460  | 0.550  | 0.481  | 1.408  | -0.927 |
| -2.169 | -1.668 | -0.129 | -0.231 | 0.102  |
| -2.759 | -2.175 | 0.208  | -0.218 | 0.426  |
| 0.553  | -0.345 | 0.263  | 0.348  | -0.084 |
| 0.500  | 0.979  | -0.273 | -0.152 | -0.121 |
| 1.711  | 1.747  | -0.673 | -0.329 | -0.344 |
| -0.189 | 0.380  | 0.459  | -0.024 | 0.483  |
| -1.865 | -1.628 | -0.029 | -0.595 | 0.567  |
| -1.545 | 0.138  | -1.365 | -1.134 | -0.232 |

|        |        |        |        |        |
|--------|--------|--------|--------|--------|
| 0.268  | -0.180 | -0.087 | 0.038  | -0.125 |
| -0.187 | -0.147 | 0.369  | 0.117  | 0.253  |
| -1.796 | -2.052 | 0.474  | 0.341  | 0.133  |
| 0.881  | 0.800  | -0.525 | 1.142  | -1.666 |
| -2.751 | -0.211 | 0.396  | -1.041 | 1.438  |
| 0.465  | 0.508  | 0.455  | 0.136  | 0.318  |
| -0.124 | 0.362  | 0.315  | -0.201 | 0.516  |
| -0.785 | -1.451 | 0.585  | 0.669  | -0.084 |
| -0.672 | -1.077 | 0.191  | -0.047 | 0.238  |
| 1.311  | 0.226  | -0.276 | 0.134  | -0.410 |
| 1.294  | 0.382  | -0.112 | 0.360  | -0.472 |
| 2.007  | 0.194  | -0.028 | 0.063  | -0.091 |
| 2.377  | 1.320  | 0.804  | 0.522  | 0.282  |
| -0.312 | -0.394 | -0.318 | 0.001  | -0.319 |
| 1.158  | 0.729  | 0.077  | 0.357  | -0.280 |
| -2.341 | -1.371 | -0.480 | -0.465 | -0.015 |
| -2.488 | -3.111 | -0.015 | -0.649 | 0.635  |
| 1.247  | 0.940  | -0.826 | -0.968 | 0.142  |
| -2.309 | -0.626 | -0.637 | -0.135 | -0.502 |
| 1.477  | 1.523  | -0.201 | 0.115  | -0.316 |
| 1.002  | 0.664  | -0.251 | -0.361 | 0.110  |
| 2.403  | 3.745  | -0.892 | -1.737 | 0.844  |
| 1.076  | 1.390  | 0.293  | -0.746 | 1.039  |
| 1.827  | 1.979  | -0.324 | -0.837 | 0.513  |
| 2.026  | 2.487  | -1.094 | -0.617 | -0.477 |
| -0.402 | 0.417  | -0.509 | -0.128 | -0.381 |
| 0.342  | 0.598  | 0.133  | 0.241  | -0.108 |
| 1.018  | 1.422  | -0.384 | -0.621 | 0.237  |
| 2.557  | 2.380  | 0.193  | -0.104 | 0.296  |
| 1.510  | 2.156  | 0.086  | -0.632 | 0.718  |
| 0.492  | 1.278  | -0.109 | -0.170 | 0.062  |
| 2.123  | 0.379  | -1.263 | -0.169 | -1.095 |
| 2.858  | 2.010  | -0.107 | 0.319  | -0.425 |
| -0.401 | 0.135  | -0.153 | -0.310 | 0.157  |
| 0.528  | 0.556  | 0.028  | -0.547 | 0.575  |
| -1.753 | -0.662 | -0.741 | -0.765 | 0.024  |
| 1.525  | 1.950  | -1.231 | -0.648 | -0.583 |
| -0.692 | -0.370 | 0.184  | -0.214 | 0.398  |
| -0.636 | -0.059 | -0.228 | -0.174 | -0.054 |
| -1.932 | -1.331 | 0.061  | -0.482 | 0.543  |
| -2.059 | -1.625 | 0.274  | 0.033  | 0.241  |
| 1.841  | 2.466  | -0.303 | -0.291 | -0.013 |
| -2.717 | -2.802 | -0.029 | 0.138  | -0.167 |
| -0.783 | -0.449 | 0.267  | -0.133 | 0.400  |
| 2.428  | 1.370  | 0.715  | 0.744  | -0.029 |
| 2.982  | 0.982  | 0.154  | 0.397  | -0.243 |
| 0.902  | 0.776  | 0.492  | 0.490  | 0.002  |
| 2.122  | 1.016  | 0.807  | 0.867  | -0.060 |
| -1.839 | -1.082 | -0.333 | -0.235 | -0.098 |
| -2.462 | -1.973 | 0.848  | 0.033  | 0.816  |
| 0.687  | -0.265 | -0.404 | -0.134 | -0.269 |



|        |        |        |        |        |
|--------|--------|--------|--------|--------|
| 0.636  | -0.133 | -1.585 | -0.550 | -1.035 |
| 0.028  | 0.759  | -0.987 | -0.952 | -0.035 |
| -1.106 | 1.497  | -0.683 | -0.129 | -0.553 |
| -2.274 | -1.579 | -0.569 | -0.077 | -0.492 |
| 0.498  | 0.391  | 0.189  | -0.062 | 0.252  |
| -0.101 | 0.622  | -0.197 | -0.570 | 0.373  |
| 1.942  | 1.988  | 0.661  | -0.169 | 0.830  |
| -1.533 | -0.444 | 0.230  | 0.560  | -0.330 |
| 3.239  | 1.878  | -0.031 | 0.178  | -0.209 |
| -0.614 | -0.364 | 0.113  | 0.022  | 0.091  |
| -2.384 | -2.471 | 0.274  | 0.566  | -0.292 |
| -0.572 | -1.294 | 0.108  | 0.150  | -0.042 |
| 1.053  | 0.864  | 0.572  | 0.079  | 0.493  |
| -1.308 | -0.622 | -0.277 | 0.008  | -0.286 |
| -1.017 | -0.815 | 0.113  | -0.295 | 0.408  |
| -1.089 | -0.481 | 0.545  | -0.406 | 0.951  |
| -1.068 | -0.599 | -0.054 | 0.990  | -1.044 |
| 0.004  | 0.518  | -0.491 | -0.524 | 0.033  |
| -2.553 | -1.804 | 0.425  | 0.762  | -0.338 |
| 2.953  | 2.047  | -0.158 | -0.093 | -0.065 |
| 2.664  | 2.175  | -0.136 | 0.157  | -0.293 |
| 2.452  | 1.778  | 0.105  | 0.327  | -0.222 |
| 0.252  | 0.038  | 0.014  | -0.078 | 0.092  |
| -0.990 | -0.857 | 0.144  | -0.215 | 0.360  |
| -1.587 | -2.015 | 0.166  | 0.388  | -0.222 |
| -1.258 | -0.956 | 0.096  | 0.127  | -0.031 |
| -4.350 | -2.413 | -0.165 | -0.264 | 0.099  |
| 0.985  | 1.166  | -0.624 | -0.169 | -0.455 |
| 0.245  | 0.774  | -0.114 | -0.379 | 0.265  |
| -1.106 | -2.285 | 0.127  | 0.210  | -0.083 |
| 1.866  | 2.489  | -0.029 | -0.213 | 0.184  |
| 2.730  | 1.368  | 0.228  | 0.307  | -0.080 |
| 1.728  | 1.828  | -0.203 | -0.342 | 0.140  |
| 1.231  | 1.511  | 0.325  | -0.443 | 0.767  |
| 1.149  | 1.625  | 0.324  | -0.451 | 0.775  |
| 0.442  | -0.812 | -0.103 | 0.480  | -0.583 |
| 0.543  | -0.498 | -0.557 | -0.014 | -0.543 |
| 1.099  | 0.143  | 0.510  | 0.281  | 0.229  |
| -3.970 | -3.074 | -0.434 | -0.481 | 0.047  |
| -2.246 | -0.910 | -0.954 | -0.759 | -0.195 |
| -1.669 | -0.394 | -0.212 | -0.109 | -0.103 |
| 1.502  | 0.807  | -0.099 | 0.165  | -0.264 |
| -3.593 | -2.335 | 0.150  | -0.146 | 0.295  |
| -1.900 | -1.639 | -0.260 | 0.123  | -0.383 |
| -1.795 | -0.248 | -0.444 | -0.022 | -0.422 |
| 1.287  | 0.234  | 0.219  | 0.422  | -0.204 |
| -0.556 | -0.305 | 0.086  | 0.191  | -0.105 |
| -0.367 | -0.774 | 0.448  | 0.245  | 0.203  |
| -0.205 | -0.093 | 0.336  | -0.238 | 0.574  |
| -1.188 | -0.483 | 0.751  | -0.011 | 0.762  |
| 0.210  | 0.462  | -0.630 | 0.204  | -0.835 |

|        |        |        |        |        |
|--------|--------|--------|--------|--------|
| -0.376 | -0.337 | 0.817  | -0.434 | 1.250  |
| -1.123 | 0.098  | 0.015  | -0.209 | 0.224  |
| 1.257  | 1.850  | -0.565 | -1.227 | 0.662  |
| -2.506 | -1.899 | 0.152  | -1.296 | 1.448  |
| -0.694 | -0.305 | -0.178 | -0.097 | -0.081 |
| -3.177 | -1.033 | -0.645 | -1.476 | 0.831  |
| -1.887 | -1.638 | -0.387 | -0.619 | 0.232  |
| -2.095 | -1.835 | 0.033  | -0.472 | 0.504  |
| 0.916  | 0.365  | 0.208  | -0.113 | 0.320  |
| -0.675 | -0.225 | 0.439  | 0.296  | 0.143  |
| 0.217  | 1.026  | 0.235  | 0.102  | 0.133  |
| 0.916  | -0.254 | -0.099 | 0.399  | -0.498 |
| 1.205  | 1.274  | -0.110 | 0.108  | -0.219 |
| 0.463  | 0.392  | 0.021  | -0.010 | 0.031  |
| 1.267  | 1.353  | -0.279 | -0.024 | -0.255 |
| 1.724  | 0.928  | 0.085  | 0.377  | -0.292 |
| -2.286 | -1.973 | -0.211 | -0.355 | 0.144  |
| -2.487 | -1.894 | 0.524  | -0.458 | 0.982  |
| 2.013  | 0.643  | 0.060  | -0.236 | 0.296  |
| -1.959 | -1.656 | -0.098 | 0.466  | -0.565 |
| 0.185  | -0.103 | -0.308 | -0.002 | -0.306 |
| -2.839 | -2.368 | -0.357 | 1.059  | -1.417 |
| 2.020  | 1.241  | 0.173  | 0.232  | -0.059 |
| -3.447 | -2.156 | -0.177 | 0.644  | -0.820 |
| 0.383  | 0.138  | 0.126  | -0.191 | 0.317  |
| 0.236  | -0.118 | 0.165  | 0.009  | 0.156  |
| 3.505  | 2.508  | -0.640 | -1.083 | 0.442  |
| 0.677  | 1.757  | 0.378  | -0.464 | 0.842  |
| 0.584  | -0.160 | -0.606 | 0.186  | -0.792 |
| -3.437 | -3.175 | 0.290  | -0.171 | 0.460  |
| -0.377 | 0.010  | 0.530  | -0.835 | 1.365  |
| -1.134 | -0.140 | 1.151  | 0.229  | 0.923  |
| 0.751  | 1.587  | -0.245 | -0.173 | -0.072 |
| 1.371  | 1.643  | 0.302  | -0.101 | 0.403  |
| 0.323  | 0.197  | 0.494  | 0.191  | 0.304  |
| -0.117 | 0.962  | 0.109  | -0.541 | 0.650  |
| -0.899 | -0.456 | -0.136 | 0.159  | -0.296 |
| 0.132  | 0.210  | 0.079  | -0.030 | 0.108  |
| -0.565 | -0.108 | -0.635 | -1.054 | 0.419  |
| -0.706 | -0.030 | 0.184  | 0.561  | -0.378 |
| 0.802  | 0.975  | -0.069 | -0.469 | 0.400  |
| -0.454 | 0.197  | 0.096  | 0.124  | -0.028 |
| -1.408 | -1.974 | -0.003 | -0.519 | 0.516  |
| 0.294  | -0.041 | -0.244 | 0.297  | -0.541 |
| -0.204 | -0.055 | -0.122 | 0.298  | -0.421 |
| -2.135 | -1.546 | -0.368 | -0.494 | 0.126  |
| 2.436  | 2.171  | 0.104  | -0.076 | 0.180  |
| -1.570 | -1.265 | 0.884  | 0.824  | 0.060  |
| 0.124  | 0.345  | 0.193  | -0.553 | 0.746  |
| -0.090 | -0.887 | -0.019 | 0.044  | -0.063 |
| -1.494 | -2.359 | 0.255  | -0.014 | 0.270  |

|        |        |        |        |        |
|--------|--------|--------|--------|--------|
| -0.352 | -0.986 | 1.166  | -0.324 | 1.490  |
| -3.135 | -2.755 | -0.200 | -0.703 | 0.503  |
| 0.493  | 0.006  | 0.196  | 0.136  | 0.060  |
| -0.722 | -0.830 | 0.230  | -0.047 | 0.277  |
| 0.319  | 0.369  | -0.258 | 0.340  | -0.598 |
| 2.448  | 2.257  | 0.421  | 0.157  | 0.264  |
| -1.751 | -2.715 | 0.010  | 0.834  | -0.824 |
| 0.089  | -1.178 | -0.615 | 0.041  | -0.656 |
| -0.294 | -0.798 | -0.264 | 0.332  | -0.596 |
| 0.947  | -0.300 | 0.130  | -0.311 | 0.441  |
| 0.808  | 0.667  | 0.244  | -0.008 | 0.252  |
| 1.008  | 1.324  | 0.638  | 0.358  | 0.279  |
| 0.147  | 1.681  | 0.948  | -0.892 | 1.840  |
| -1.647 | -0.689 | 0.282  | -0.289 | 0.571  |
| -1.389 | -1.832 | 0.028  | 0.489  | -0.461 |
| -1.552 | -1.916 | 0.212  | -0.235 | 0.447  |
| -0.266 | 0.094  | 0.282  | -0.126 | 0.408  |
| -0.268 | -0.112 | 0.440  | -0.465 | 0.904  |
| -1.326 | -2.031 | 0.203  | 0.330  | -0.126 |
| 2.728  | 3.048  | 0.563  | -0.159 | 0.722  |
| 1.681  | 1.609  | 0.291  | 0.463  | -0.173 |
| 0.556  | 0.591  | 0.638  | 0.042  | 0.595  |
| 2.224  | 2.373  | -0.217 | 0.096  | -0.312 |
| 0.322  | 0.439  | 0.910  | 0.538  | 0.373  |
| 1.652  | 0.404  | 0.472  | 0.661  | -0.189 |
| -1.233 | -0.825 | 0.165  | -0.318 | 0.483  |
| -1.452 | -1.048 | 0.771  | -0.331 | 1.102  |
| 1.076  | 0.091  | 0.076  | 1.137  | -1.062 |
| 0.111  | -0.544 | 0.427  | 0.615  | -0.188 |
| 1.630  | 1.914  | 0.204  | -0.301 | 0.505  |
| 1.520  | 1.895  | 0.728  | -0.069 | 0.797  |
| 0.339  | -0.507 | 0.139  | -0.024 | 0.163  |
| -1.106 | -0.733 | 0.098  | -0.187 | 0.285  |
| 0.650  | 0.599  | -0.276 | -0.091 | -0.185 |
| 1.459  | 1.845  | -0.461 | -0.223 | -0.238 |
| -2.906 | -2.354 | -0.169 | 0.183  | -0.353 |
| -1.032 | -0.543 | -0.060 | -0.032 | -0.028 |
| -1.816 | -2.229 | -0.064 | -0.065 | 0.001  |
| -0.383 | -0.487 | 0.462  | 0.569  | -0.106 |
| -0.422 | -0.537 | 0.662  | -0.199 | 0.861  |
| -1.614 | -1.023 | 0.650  | 1.003  | -0.353 |
| -1.121 | -0.741 | 0.417  | -0.135 | 0.552  |
| -1.102 | -0.852 | -0.103 | -0.308 | 0.206  |
| -1.921 | -2.258 | 0.071  | -0.015 | 0.086  |
| -0.961 | -0.308 | 0.011  | -0.014 | 0.024  |
| -0.026 | -0.228 | 0.257  | 0.433  | -0.176 |
| 0.561  | -0.277 | 0.406  | 0.057  | 0.350  |
| -1.622 | -2.157 | -0.055 | -0.613 | 0.558  |
| -0.333 | -0.178 | 0.029  | 0.039  | -0.009 |
| 1.114  | 1.193  | -0.127 | -0.081 | -0.045 |
| -2.058 | -1.725 | 0.214  | -0.123 | 0.337  |

|        |        |        |        |        |
|--------|--------|--------|--------|--------|
| -1.812 | -1.213 | -0.447 | -0.800 | 0.353  |
| -1.022 | -0.690 | -0.890 | -0.688 | -0.203 |
| 0.911  | 1.436  | 0.165  | 0.226  | -0.061 |
| 1.356  | 1.364  | 0.607  | 0.055  | 0.552  |
| 0.167  | -0.760 | -0.221 | -0.293 | 0.071  |
| -2.108 | -1.997 | 0.302  | 0.406  | -0.104 |
| -1.224 | -1.201 | -0.258 | -0.357 | 0.099  |
| 0.085  | 0.184  | -0.280 | 0.133  | -0.413 |
| 0.420  | 0.773  | 0.556  | 0.199  | 0.357  |
| -0.722 | -0.235 | 0.693  | 0.671  | 0.021  |
| 2.340  | 1.321  | 0.450  | 0.259  | 0.191  |
| 2.039  | 1.200  | 0.560  | 0.769  | -0.209 |
| -0.412 | -0.733 | 0.127  | 0.220  | -0.093 |
| 0.531  | 0.776  | 0.015  | 0.503  | -0.488 |
| 1.475  | 1.581  | -0.277 | -0.097 | -0.180 |
| -1.773 | -1.386 | 0.356  | -0.401 | 0.757  |
| 0.347  | 1.394  | 0.325  | -0.323 | 0.648  |
| -1.910 | -2.132 | 0.650  | 0.380  | 0.271  |
| -2.358 | -2.931 | 0.228  | -0.249 | 0.477  |
| -1.406 | -1.148 | 0.467  | 0.125  | 0.342  |
| 0.018  | -0.573 | -1.086 | -0.869 | -0.217 |
| -1.744 | -1.567 | 0.366  | 0.322  | 0.045  |
| -2.539 | -2.449 | 0.346  | -0.462 | 0.807  |
| -2.538 | -2.665 | 0.147  | 0.297  | -0.150 |
| -0.111 | 0.733  | 0.625  | -0.141 | 0.766  |
| 0.725  | -0.620 | 0.129  | 0.210  | -0.081 |
| -0.254 | 0.010  | -0.585 | -0.665 | 0.080  |
| 1.818  | 1.789  | 0.256  | 0.340  | -0.084 |
| 0.615  | 0.657  | 0.698  | 0.282  | 0.416  |
| 0.933  | 1.300  | 0.066  | -0.730 | 0.797  |
| -2.597 | -2.120 | -0.270 | -0.642 | 0.372  |
| -0.537 | -1.005 | -0.254 | 0.630  | -0.884 |
| -0.814 | -0.788 | -1.311 | -0.683 | -0.628 |
| 0.053  | 0.027  | 0.373  | 0.025  | 0.348  |
| 0.137  | 0.213  | -0.375 | 0.118  | -0.493 |
| -1.895 | -1.696 | -0.515 | -0.260 | -0.255 |
| 1.227  | -0.016 | -0.325 | -0.672 | 0.347  |
| -1.289 | -0.086 | -0.235 | -0.412 | 0.177  |
| 1.650  | 1.515  | 0.424  | 0.216  | 0.208  |
| 0.397  | 1.161  | -0.546 | -0.383 | -0.163 |
| -1.138 | -2.721 | -0.079 | 0.180  | -0.259 |
| -0.411 | 0.308  | 0.221  | -0.195 | 0.416  |
| -2.024 | -2.104 | 0.083  | -0.370 | 0.453  |
| -2.097 | -1.805 | -0.276 | -0.394 | 0.119  |
| 0.105  | 0.550  | -0.122 | -0.129 | 0.007  |
| -0.646 | -0.284 | 0.436  | -0.227 | 0.662  |
| -0.335 | -1.121 | 0.089  | 0.243  | -0.154 |
| 0.138  | 0.997  | -0.528 | -0.269 | -0.259 |
| 2.457  | 2.422  | 0.477  | -0.193 | 0.670  |
| 3.016  | 1.576  | 0.607  | 0.529  | 0.078  |
| 0.012  | -1.072 | 0.291  | 0.271  | 0.020  |

|        |        |        |        |        |
|--------|--------|--------|--------|--------|
| -2.528 | -1.452 | 0.007  | -0.308 | 0.315  |
| 1.020  | -0.032 | 0.284  | 0.161  | 0.123  |
| 1.163  | 0.875  | 0.566  | 0.291  | 0.276  |
| 1.334  | -0.035 | -0.429 | 0.320  | -0.749 |
| -1.825 | -0.181 | -0.336 | -0.522 | 0.185  |
| -0.717 | -0.671 | -0.058 | -0.629 | 0.570  |
| -1.061 | -0.678 | -0.029 | -0.320 | 0.291  |
| -2.452 | -0.656 | -0.663 | -0.765 | 0.102  |
| -2.345 | -1.953 | 0.176  | -0.509 | 0.685  |
| 0.132  | -1.250 | 0.404  | 0.316  | 0.089  |
| -1.137 | -1.456 | 0.236  | -0.531 | 0.767  |
| 1.228  | 0.579  | 0.519  | 0.615  | -0.096 |
| -3.404 | -3.025 | -0.211 | 0.094  | -0.305 |
| -0.798 | -2.385 | 0.051  | 0.152  | -0.100 |
| -3.157 | -1.871 | -0.996 | 0.122  | -1.118 |
| -1.117 | -0.706 | 0.274  | -0.145 | 0.420  |
| -1.222 | -1.245 | 0.204  | 0.424  | -0.220 |
| -2.877 | -2.615 | 0.083  | 0.157  | -0.074 |
| -0.186 | -0.229 | 0.118  | 0.226  | -0.108 |
| 0.074  | -0.257 | -0.133 | -0.060 | -0.073 |
| -1.138 | -1.273 | -0.849 | -0.428 | -0.421 |
| -0.226 | -1.192 | -0.140 | -0.109 | -0.031 |
| -1.345 | -1.942 | 0.307  | 0.392  | -0.085 |
| 1.204  | 0.263  | 0.203  | 0.315  | -0.112 |
| -1.304 | -0.622 | -0.078 | -0.199 | 0.121  |
| 0.277  | -0.572 | -0.035 | 0.624  | -0.660 |
| -0.933 | -1.064 | 0.060  | -0.080 | 0.140  |
| -2.136 | -1.241 | -0.229 | 0.050  | -0.279 |
| 0.563  | 0.603  | -0.549 | -0.609 | 0.060  |
| -1.109 | -0.364 | -0.659 | 0.321  | -0.980 |
| 1.841  | 1.466  | 0.134  | -0.368 | 0.502  |
| -1.529 | -1.614 | 0.027  | 0.055  | -0.028 |
| -0.367 | 0.104  | 0.020  | 0.822  | -0.801 |
| -2.635 | -0.944 | -0.415 | 0.280  | -0.694 |
| -1.613 | -1.342 | 0.304  | 0.561  | -0.258 |
| 2.026  | 0.922  | 0.400  | -0.141 | 0.540  |
| 1.515  | 0.851  | 0.460  | -0.058 | 0.518  |
| -0.120 | -1.724 | 0.057  | -0.218 | 0.274  |
| 0.677  | 0.744  | 0.558  | 0.494  | 0.063  |
| 0.014  | -0.662 | -0.064 | -0.084 | 0.019  |
| -0.440 | -1.112 | 0.178  | -0.181 | 0.359  |
| -0.773 | -0.448 | 0.058  | -0.067 | 0.125  |
| 0.187  | 0.475  | -0.287 | -0.191 | -0.096 |
| 1.829  | 1.489  | -0.030 | -0.057 | 0.027  |
| -0.161 | -0.251 | 0.055  | -0.202 | 0.257  |
| 0.705  | 0.792  | 0.124  | -0.365 | 0.489  |
| -0.065 | 0.353  | 0.100  | 0.397  | -0.297 |
| -2.299 | -1.478 | -0.197 | -0.746 | 0.549  |
| 1.956  | 0.639  | -0.110 | 0.320  | -0.430 |
| 0.636  | 0.978  | -0.152 | -0.446 | 0.294  |
| -0.724 | -0.669 | 0.280  | 0.005  | 0.275  |

|        |        |        |        |        |
|--------|--------|--------|--------|--------|
| 1.010  | -0.106 | 0.573  | 0.116  | 0.457  |
| -0.055 | 0.570  | 0.275  | 0.121  | 0.154  |
| -2.568 | -1.125 | -0.357 | 0.596  | -0.953 |
| -0.216 | 0.592  | 0.216  | 0.441  | -0.224 |
| 1.824  | 1.476  | 0.574  | 0.182  | 0.392  |
| -0.357 | -0.909 | -0.011 | -0.134 | 0.123  |
| -0.179 | 0.563  | -1.090 | -0.758 | -0.332 |
| -0.053 | -0.678 | -0.175 | -0.170 | -0.005 |
| 0.716  | -0.508 | -0.477 | 0.683  | -1.160 |
| 1.810  | 2.184  | -0.238 | -0.127 | -0.112 |
| -0.201 | -0.222 | 0.674  | 0.340  | 0.334  |
| -1.958 | -1.363 | -0.220 | -0.198 | -0.023 |
| -1.604 | -1.220 | 0.197  | -0.322 | 0.518  |
| -0.140 | -0.188 | -0.028 | -0.325 | 0.297  |
| -0.535 | -0.298 | -0.370 | -0.490 | 0.121  |
| -1.592 | -1.583 | 0.492  | -0.441 | 0.933  |
| 0.119  | -0.061 | -0.201 | 0.607  | -0.808 |
| 0.156  | 0.256  | -0.100 | 0.264  | -0.365 |
| -2.653 | -2.315 | 0.392  | 0.112  | 0.280  |
| 0.633  | 1.098  | -0.329 | -0.278 | -0.051 |
| 2.378  | 1.544  | 0.130  | 0.353  | -0.224 |
| 1.606  | 0.549  | -0.263 | 0.665  | -0.928 |
| -2.323 | -1.298 | 0.667  | -0.362 | 1.029  |
| 1.197  | 0.918  | 0.011  | -1.043 | 1.055  |
| 1.515  | 1.516  | 0.371  | 0.087  | 0.284  |
| 2.521  | 2.354  | -0.343 | -0.429 | 0.086  |
| 0.716  | -0.604 | 0.726  | 0.447  | 0.279  |
| 3.236  | 2.520  | 0.620  | 0.285  | 0.335  |
| 0.424  | 1.079  | -0.036 | -0.026 | -0.010 |
| 1.130  | 0.178  | 0.186  | 0.618  | -0.432 |
| 1.003  | 0.969  | -0.255 | -0.105 | -0.150 |
| 1.128  | 1.435  | -0.714 | -0.400 | -0.314 |
| 1.879  | 2.087  | 0.642  | 0.589  | 0.052  |
| -1.512 | -1.082 | -0.179 | -0.532 | 0.353  |
| -2.841 | -2.184 | -0.708 | -0.084 | -0.624 |
| -0.517 | -0.012 | 0.360  | -0.400 | 0.760  |
| 1.262  | 0.283  | 0.045  | -0.297 | 0.341  |
| -0.295 | 0.099  | 0.274  | -0.279 | 0.553  |
| -2.792 | -2.285 | 0.111  | -0.074 | 0.185  |
| -3.166 | -2.516 | 0.007  | -0.740 | 0.747  |
| 0.184  | 0.100  | -0.475 | -0.349 | -0.126 |
| -1.878 | -1.267 | -0.084 | -0.701 | 0.618  |
| 0.030  | -0.133 | 0.010  | 0.205  | -0.195 |
| 1.369  | 0.717  | -0.590 | -0.624 | 0.034  |
| 0.802  | 0.914  | 0.441  | -0.309 | 0.749  |
| 0.979  | 0.881  | -0.053 | -0.221 | 0.168  |
| -1.288 | -0.742 | -0.361 | -0.016 | -0.346 |
| -1.147 | -0.661 | -0.019 | -0.616 | 0.596  |
| 1.517  | 0.818  | 0.085  | 0.304  | -0.219 |
| 0.901  | 0.288  | -0.357 | 0.206  | -0.563 |
| -1.231 | -0.796 | -0.120 | -0.802 | 0.682  |

|        |        |        |        |        |
|--------|--------|--------|--------|--------|
| -3.301 | -2.455 | -0.535 | -0.559 | 0.024  |
| -1.377 | -0.611 | 0.395  | 0.052  | 0.343  |
| 0.127  | 0.263  | 0.890  | -0.150 | 1.040  |
| -1.696 | -1.213 | -0.103 | -0.788 | 0.685  |
| -2.205 | -1.673 | -0.768 | -0.170 | -0.598 |
| -0.355 | -0.215 | 0.199  | -0.215 | 0.413  |
| 1.787  | 0.615  | 0.566  | -0.140 | 0.706  |
| -1.183 | -1.485 | 0.012  | -0.182 | 0.194  |
| -0.237 | -0.204 | 0.376  | -0.648 | 1.024  |
| 1.225  | 1.627  | 0.298  | -0.132 | 0.430  |
| 3.079  | 3.339  | 0.021  | -0.176 | 0.198  |
| -2.901 | -1.442 | 0.241  | -0.323 | 0.564  |
| 0.463  | 0.368  | -0.213 | -0.209 | -0.004 |
| -2.143 | -1.740 | 0.059  | -0.689 | 0.749  |
| -0.440 | -0.962 | 0.017  | 0.273  | -0.256 |
| -2.003 | -2.025 | 0.206  | -0.179 | 0.386  |
| -1.652 | -1.474 | 0.058  | -0.320 | 0.378  |
| -1.204 | -1.094 | -0.381 | -0.326 | -0.056 |
| 0.796  | 0.005  | -0.192 | -0.265 | 0.073  |
| -1.427 | -1.260 | -0.628 | -0.991 | 0.363  |
| -1.607 | -1.886 | -0.401 | -0.558 | 0.157  |
| -2.572 | -1.694 | -0.313 | -0.057 | -0.256 |
| -3.255 | -3.160 | -0.233 | -0.261 | 0.028  |
| -3.412 | -2.686 | -0.353 | -0.341 | -0.012 |
| -2.192 | -1.630 | 0.092  | -0.383 | 0.475  |
| -0.562 | -0.414 | 0.272  | 1.040  | -0.768 |
| -2.145 | -1.826 | -0.292 | -0.708 | 0.416  |
| 0.889  | 0.605  | 0.141  | 0.039  | 0.102  |
| 0.561  | -0.021 | -0.133 | 0.208  | -0.341 |
| -2.707 | -2.369 | -0.082 | -0.230 | 0.149  |
| -0.332 | -0.412 | 0.201  | 0.036  | 0.165  |
| 1.740  | 1.216  | 0.039  | 0.118  | -0.080 |
| -1.166 | -0.697 | 0.489  | -0.286 | 0.775  |
| -1.197 | -0.772 | 0.159  | 0.195  | -0.035 |
| -2.348 | -2.471 | 0.285  | 0.086  | 0.199  |
| -0.534 | -1.166 | 0.243  | 0.350  | -0.107 |
| -1.466 | -1.813 | 0.360  | -0.307 | 0.668  |
| 0.390  | -0.886 | 0.171  | -0.035 | 0.206  |
| -1.214 | -0.784 | 0.016  | -0.452 | 0.469  |
| -0.497 | -0.273 | 0.519  | 0.278  | 0.241  |
| 0.860  | 0.463  | 0.240  | 0.619  | -0.379 |
| -1.021 | -0.577 | -0.146 | -0.691 | 0.545  |
| -1.734 | -1.353 | 0.330  | -0.177 | 0.506  |
| 0.551  | 0.637  | 0.357  | 0.670  | -0.312 |
| 0.389  | 0.458  | -0.089 | -0.280 | 0.191  |
| 0.494  | -0.276 | 0.222  | 0.264  | -0.042 |
| 3.706  | 2.608  | 0.212  | 0.435  | -0.223 |
| -1.344 | -0.817 | 0.036  | 0.073  | -0.037 |
| -2.464 | -1.888 | 0.450  | 1.071  | -0.621 |
| -1.584 | -1.013 | -1.074 | -0.855 | -0.219 |
| -0.476 | -0.961 | 0.409  | -0.093 | 0.501  |

|        |        |        |        |        |
|--------|--------|--------|--------|--------|
| 1.117  | 1.439  | 0.376  | 0.173  | 0.204  |
| -0.090 | 0.359  | 0.174  | -0.188 | 0.362  |
| -0.214 | -1.014 | 0.009  | 0.306  | -0.298 |
| 1.141  | 1.563  | 0.440  | -0.050 | 0.490  |
| -1.318 | -0.752 | -0.644 | -0.074 | -0.570 |
| -0.320 | -0.759 | 0.226  | -0.003 | 0.229  |
| 0.725  | 1.030  | 0.164  | 0.008  | 0.156  |
| -1.050 | -1.339 | 0.349  | -0.071 | 0.420  |
| -2.336 | -1.886 | 0.389  | -0.738 | 1.127  |
| -0.546 | -1.484 | 0.494  | -0.160 | 0.654  |
| -0.808 | -0.078 | -0.212 | 0.343  | -0.556 |
| 0.860  | 0.091  | 0.170  | 0.669  | -0.499 |
| 0.846  | 0.575  | -0.086 | -1.199 | 1.113  |
| -0.814 | -1.321 | 0.214  | 0.519  | -0.305 |
| -0.420 | -0.155 | 0.284  | 0.150  | 0.133  |
| -1.599 | -0.984 | 0.052  | 0.441  | -0.389 |
| 2.348  | 1.883  | 0.254  | 0.353  | -0.099 |
| -4.705 | -3.756 | -0.299 | 0.286  | -0.585 |
| -0.780 | -0.471 | -0.912 | -0.493 | -0.419 |
| -1.838 | -0.294 | -0.642 | -1.458 | 0.816  |
| -1.039 | -0.504 | -0.214 | -0.281 | 0.068  |
| -1.191 | -1.463 | -0.415 | 0.063  | -0.477 |
| 1.536  | 1.857  | -0.098 | -0.749 | 0.651  |
| -2.187 | -0.527 | -0.114 | 0.165  | -0.279 |
| -1.042 | -0.867 | 0.160  | 0.324  | -0.164 |
| -2.290 | -1.686 | 0.286  | 0.662  | -0.377 |
| 1.410  | 1.856  | 0.335  | 0.199  | 0.136  |
| -1.354 | -1.027 | 0.238  | -0.566 | 0.804  |
| 0.940  | -0.121 | 0.109  | -0.480 | 0.589  |
| -0.765 | -1.120 | 0.081  | 0.037  | 0.043  |
| -1.241 | -0.882 | 0.205  | -0.178 | 0.383  |
| -1.327 | -1.188 | -0.576 | 0.539  | -1.115 |
| -1.356 | -1.248 | -0.129 | 0.295  | -0.423 |
| -2.082 | -1.548 | 0.304  | -0.832 | 1.136  |
| -1.248 | -0.842 | 0.283  | -0.911 | 1.194  |
| 3.047  | 2.834  | 0.727  | -0.291 | 1.018  |
| -1.027 | -0.640 | 0.292  | 0.322  | -0.029 |
| 1.102  | 1.120  | -0.062 | 0.224  | -0.286 |
| -1.210 | -1.937 | 0.098  | 0.219  | -0.121 |
| -3.303 | -3.209 | -0.212 | 0.620  | -0.832 |
| -1.496 | -1.964 | 0.365  | 0.033  | 0.332  |
| 0.693  | 0.454  | 0.193  | 0.322  | -0.129 |
| -0.618 | -0.632 | 0.095  | -0.012 | 0.107  |
| -1.557 | -1.056 | 0.308  | 0.036  | 0.272  |
| 0.637  | -0.440 | -0.691 | 0.209  | -0.901 |
| -1.768 | -1.149 | -0.166 | -0.583 | 0.417  |
| -0.579 | -0.340 | 0.249  | -0.071 | 0.320  |
| -2.779 | -2.344 | -0.049 | 0.056  | -0.105 |
| 0.872  | 0.057  | -0.064 | 0.209  | -0.273 |
| -0.278 | -0.779 | -0.620 | 0.023  | -0.643 |
| -4.145 | -3.599 | -0.154 | -0.015 | -0.139 |



|        |        |        |        |        |
|--------|--------|--------|--------|--------|
| -2.182 | -2.049 | 0.047  | 0.045  | 0.002  |
| 0.604  | 1.330  | -0.212 | -0.233 | 0.021  |
| -1.140 | -0.001 | 0.539  | -0.693 | 1.232  |
| 1.099  | 0.216  | 0.554  | 0.675  | -0.121 |
| -0.468 | 1.642  | -0.753 | -1.099 | 0.346  |
| -0.831 | -1.025 | -0.368 | -0.102 | -0.266 |
| -1.579 | -0.936 | 0.147  | -0.535 | 0.682  |
| -1.338 | -0.716 | 0.814  | -0.189 | 1.003  |
| -1.520 | -1.894 | 0.295  | 0.404  | -0.109 |
| -1.598 | -1.310 | -0.045 | -0.394 | 0.349  |
| 0.804  | 0.909  | 0.044  | -0.349 | 0.394  |
| -1.627 | -1.389 | -0.177 | -0.127 | -0.051 |
| -0.414 | 0.544  | -0.006 | 0.051  | -0.057 |
| -0.819 | 0.131  | -0.107 | -0.488 | 0.382  |
| -1.745 | -1.674 | 0.235  | -0.030 | 0.265  |
| -1.467 | -1.630 | 0.001  | -0.302 | 0.303  |
| -0.479 | -0.154 | 0.108  | -0.675 | 0.783  |
| -3.451 | -2.706 | -0.091 | 0.102  | -0.193 |
| -2.481 | -1.671 | 0.205  | -0.124 | 0.329  |
| -1.713 | -2.090 | -0.350 | 0.140  | -0.490 |
| 1.062  | 0.863  | 0.402  | -0.152 | 0.554  |
| -0.897 | -1.177 | 0.361  | -0.076 | 0.437  |
| 1.959  | 2.215  | -0.042 | -0.391 | 0.350  |
| -1.332 | -0.846 | -0.045 | 0.075  | -0.120 |
| 1.367  | 0.400  | 0.584  | 0.980  | -0.396 |
| 0.556  | 0.643  | 0.521  | -0.102 | 0.623  |
| 0.643  | -0.551 | 0.068  | 0.375  | -0.308 |
| 1.416  | 0.626  | -0.038 | 0.027  | -0.065 |
| 1.128  | 0.528  | 0.342  | 0.512  | -0.170 |
| 1.923  | 1.656  | 0.233  | -0.074 | 0.307  |
| -0.938 | -0.684 | -0.631 | -0.485 | -0.146 |
| -0.041 | 2.152  | -0.177 | -0.920 | 0.744  |
| -2.730 | -1.559 | 0.274  | -0.546 | 0.819  |
| 2.464  | 1.620  | 0.060  | -0.315 | 0.375  |
| 1.706  | 1.121  | 0.392  | 0.861  | -0.469 |
| -1.780 | -1.003 | -0.810 | -0.140 | -0.670 |
| 1.077  | 1.114  | -0.016 | 0.152  | -0.168 |
| 1.666  | 1.634  | 0.362  | 0.916  | -0.554 |
| 1.892  | 0.798  | 0.237  | 0.392  | -0.155 |
| -0.872 | -1.582 | 0.065  | 0.210  | -0.145 |
| 1.952  | 1.223  | 0.411  | -0.002 | 0.412  |
| 0.380  | -0.169 | -0.610 | -0.279 | -0.331 |
| -0.693 | -0.456 | 0.229  | -0.810 | 1.038  |
| 0.242  | -0.048 | 0.227  | 0.173  | 0.054  |
| 0.886  | 0.834  | 0.242  | 0.698  | -0.456 |
| 0.607  | 0.757  | 0.203  | 0.385  | -0.182 |
| 0.784  | 0.094  | -0.373 | -0.007 | -0.366 |
| 1.102  | -0.020 | -0.136 | 0.159  | -0.295 |
| 0.824  | -0.312 | 0.432  | 0.495  | -0.063 |
| 0.820  | 0.869  | -0.496 | -0.623 | 0.127  |
| 1.942  | 1.661  | 0.229  | -0.277 | 0.506  |

|        |        |        |        |        |
|--------|--------|--------|--------|--------|
| -1.262 | -0.682 | 0.743  | -0.608 | 1.350  |
| -1.115 | -0.088 | -0.168 | -1.026 | 0.858  |
| -1.944 | -1.623 | -0.267 | -0.355 | 0.088  |
| -1.441 | -1.694 | -0.305 | 0.221  | -0.526 |
| -0.214 | 0.171  | -0.154 | 0.124  | -0.277 |
| 1.000  | 1.616  | 0.343  | -0.322 | 0.665  |
| 0.956  | 1.251  | 0.812  | -0.392 | 1.204  |
| 2.358  | 2.160  | 0.161  | -0.482 | 0.643  |
| 1.216  | 1.044  | 0.079  | 0.098  | -0.019 |
| -2.138 | -1.383 | -0.252 | -0.114 | -0.138 |
| 0.013  | 0.485  | -0.382 | -0.103 | -0.280 |
| 0.327  | 0.390  | 0.783  | 0.155  | 0.627  |
| -0.192 | -0.387 | 0.439  | -0.282 | 0.721  |
| -1.796 | -0.771 | -0.331 | -0.761 | 0.430  |
| 0.817  | -0.088 | 0.123  | -0.027 | 0.150  |
| 0.037  | 0.088  | 0.167  | -0.750 | 0.917  |
| 0.287  | 0.086  | -0.669 | -0.359 | -0.310 |
| -1.442 | -1.787 | 0.280  | 0.155  | 0.126  |
| 0.319  | -1.332 | 0.031  | 0.246  | -0.215 |
| -0.708 | -0.391 | -0.658 | -0.323 | -0.336 |
| -3.118 | -3.001 | 0.439  | 0.624  | -0.186 |
| -2.207 | -1.731 | 0.073  | -0.217 | 0.289  |
| 1.964  | 2.126  | -0.389 | -0.545 | 0.156  |
| 0.521  | 0.675  | -0.979 | -0.517 | -0.462 |
| -2.823 | -2.334 | 0.301  | 0.280  | 0.021  |
| -1.482 | -0.919 | -0.120 | -0.599 | 0.480  |
| -1.244 | -1.277 | -0.075 | -0.400 | 0.325  |
| 0.960  | 1.228  | -0.472 | 0.194  | -0.666 |
| -0.687 | -0.303 | -0.068 | 0.021  | -0.089 |
| 1.721  | 0.861  | -1.102 | -0.093 | -1.010 |
| 3.356  | 1.208  | 0.404  | 0.395  | 0.009  |
| 0.327  | 1.087  | 0.200  | -0.181 | 0.381  |
| -2.309 | -1.036 | 0.227  | 0.210  | 0.017  |
| 1.969  | -1.895 | -0.448 | -0.346 | -0.103 |
| 3.152  | -1.539 | -0.497 | -0.213 | -0.283 |
| 4.078  | -1.228 | -0.574 | -0.651 | 0.077  |
| 2.832  | -2.059 | -0.416 | -0.083 | -0.332 |
| 1.669  | -1.546 | -0.554 | -1.872 | 1.318  |
| 2.214  | -3.090 | -0.901 | -0.294 | -0.607 |
| 1.006  | -1.653 | -0.958 | 0.239  | -1.197 |
| 2.171  | -2.545 | -0.810 | 0.053  | -0.863 |
| 2.107  | -3.173 | -0.348 | 0.132  | -0.480 |
| -1.534 | -0.311 | -0.328 | -0.533 | 0.204  |
| 1.898  | -1.095 | -0.734 | -0.113 | -0.621 |
| 1.819  | -2.294 | -0.560 | -0.589 | 0.029  |
| 4.116  | -0.196 | -0.646 | -0.812 | 0.166  |
| 3.726  | -1.779 | -0.796 | -0.384 | -0.413 |
| 1.362  | -0.840 | -1.114 | -1.141 | 0.027  |
| 0.344  | -4.347 | -0.633 | -0.328 | -0.305 |
| 3.827  | -2.759 | -0.449 | -0.032 | -0.417 |
| 1.437  | -0.697 | -0.397 | 0.241  | -0.638 |

|        |        |        |        |        |
|--------|--------|--------|--------|--------|
| 1.139  | -0.685 | -0.232 | -0.708 | 0.476  |
| 2.100  | 1.746  | 0.115  | -0.011 | 0.126  |
| 2.136  | 1.608  | 0.176  | 0.556  | -0.380 |
| 0.849  | 0.749  | 0.074  | 0.266  | -0.192 |
| -0.772 | 0.299  | 0.271  | 0.227  | 0.044  |
| 0.987  | 0.739  | -0.012 | 0.314  | -0.326 |
| -2.120 | -1.524 | -0.501 | 0.052  | -0.552 |
| -1.900 | -1.419 | -0.331 | -0.136 | -0.195 |
| -1.799 | -1.495 | -0.270 | 0.103  | -0.373 |
| -1.228 | -0.862 | -0.058 | 0.070  | -0.128 |
| 2.028  | 1.384  | 0.650  | 0.193  | 0.457  |
| -0.668 | -1.782 | -0.090 | 0.459  | -0.549 |
| -1.677 | -1.245 | 0.021  | -0.278 | 0.299  |
| 0.867  | 0.589  | 0.160  | -0.234 | 0.395  |
| -1.436 | -1.269 | -0.203 | -0.253 | 0.050  |
| 0.976  | 0.128  | -0.568 | 0.005  | -0.574 |
| -1.907 | -1.249 | 0.367  | -1.695 | 2.063  |
| -4.310 | -3.162 | -0.377 | 0.616  | -0.992 |
| -3.560 | -3.103 | 0.135  | 0.348  | -0.213 |
| -2.726 | -2.082 | 0.327  | 1.022  | -0.695 |
| -0.834 | -0.734 | 0.018  | -0.535 | 0.553  |
| 0.985  | -0.056 | 0.273  | 0.487  | -0.215 |
| 0.879  | 0.164  | 1.439  | 0.884  | 0.555  |
| -2.910 | -2.542 | -0.476 | 0.337  | -0.813 |
| -2.482 | -0.205 | 0.192  | 1.042  | -0.850 |
| -2.299 | -1.771 | -0.118 | 0.154  | -0.272 |
| 2.216  | 1.552  | 0.203  | -0.120 | 0.323  |
| 0.531  | 0.674  | -0.109 | -0.205 | 0.096  |
| 0.869  | 0.345  | 0.157  | -0.160 | 0.318  |
| -0.202 | 0.137  | 0.362  | -0.115 | 0.478  |
| -2.786 | -2.799 | 0.266  | 0.456  | -0.189 |
| -1.468 | -1.056 | 1.170  | 0.401  | 0.768  |
| -0.117 | 0.392  | 0.375  | -0.366 | 0.741  |
| -2.274 | -1.964 | 0.153  | -0.188 | 0.341  |
| 0.911  | 0.424  | -0.385 | -0.231 | -0.154 |
| 0.940  | 1.142  | 0.410  | -0.523 | 0.933  |
| 1.357  | 0.958  | 0.133  | 0.462  | -0.329 |
| -3.519 | -2.357 | -0.020 | 0.566  | -0.587 |
| -2.352 | -1.902 | -0.421 | -0.228 | -0.192 |
| -2.149 | -2.061 | 0.037  | 0.884  | -0.847 |
| -3.569 | -2.023 | -0.324 | 0.382  | -0.706 |
| 1.206  | 1.162  | 0.410  | 0.466  | -0.056 |
| -2.102 | -1.926 | -0.264 | 0.399  | -0.663 |
| -3.093 | -1.262 | -0.490 | -0.016 | -0.474 |
| -1.427 | -1.379 | 0.051  | 1.003  | -0.953 |
| -1.548 | -1.134 | 0.264  | 0.246  | 0.017  |
| -2.536 | -1.707 | 0.233  | 0.748  | -0.515 |
| -0.830 | -0.595 | 0.495  | 0.848  | -0.353 |
| -2.236 | -1.770 | 0.121  | 0.825  | -0.704 |
| -1.814 | -0.807 | -0.290 | -0.178 | -0.113 |
| -1.731 | -0.838 | -0.411 | -0.665 | 0.254  |

|        |        |        |        |        |
|--------|--------|--------|--------|--------|
| -2.247 | -0.488 | -0.263 | 0.070  | -0.334 |
| 0.414  | -0.246 | 0.010  | 0.104  | -0.094 |
| -0.495 | -0.205 | 0.525  | 0.100  | 0.425  |
| 2.068  | 0.685  | -1.107 | -0.589 | -0.518 |
| -0.281 | -0.164 | -0.451 | -0.020 | -0.431 |
| -2.627 | -1.819 | 0.298  | -0.394 | 0.692  |
| 0.955  | 1.241  | 0.172  | 0.370  | -0.199 |
| -0.572 | -1.213 | -0.551 | -0.319 | -0.231 |
| -0.821 | -1.253 | 0.215  | 0.397  | -0.182 |
| 0.124  | 0.204  | 0.694  | 0.380  | 0.314  |
| -1.583 | -0.756 | 0.586  | -0.553 | 1.139  |
| 0.231  | 0.005  | -0.234 | -0.874 | 0.639  |
| 0.921  | 1.379  | -0.233 | -0.355 | 0.122  |
| 0.868  | 1.607  | 0.825  | -0.105 | 0.929  |
| 2.296  | 1.932  | 1.026  | -0.099 | 1.125  |
| 0.642  | 1.184  | 1.262  | 0.302  | 0.960  |
| 1.246  | 1.383  | 0.204  | -0.116 | 0.320  |
| 0.564  | 1.282  | 0.109  | -0.197 | 0.305  |
| -0.014 | 0.549  | 0.854  | -0.037 | 0.891  |
| -0.419 | 0.444  | 0.193  | -0.253 | 0.445  |
| 0.497  | 0.878  | 0.479  | -0.286 | 0.766  |
| 1.747  | 1.714  | -0.300 | -0.766 | 0.466  |
| 1.212  | 1.424  | 0.771  | -0.135 | 0.906  |
| -0.184 | 0.544  | 0.069  | -0.294 | 0.363  |
| 1.247  | 1.484  | 0.217  | -0.469 | 0.686  |
| 1.484  | 1.572  | 0.124  | -0.384 | 0.508  |
| 0.658  | 0.618  | 0.117  | -0.530 | 0.647  |
| -1.153 | -1.623 | 0.002  | -0.111 | 0.113  |
| -1.599 | -1.088 | -0.098 | -0.520 | 0.422  |
| -1.284 | -0.864 | 0.124  | 0.116  | 0.008  |
| 1.187  | 1.547  | -0.127 | -0.210 | 0.083  |
| -3.057 | -3.116 | 0.428  | -0.292 | 0.720  |
| -1.200 | -0.908 | -0.029 | -0.175 | 0.146  |
| 1.959  | 1.040  | -0.013 | -0.135 | 0.122  |
| 2.078  | 1.958  | 0.155  | -0.397 | 0.552  |
| 1.839  | 0.784  | -0.029 | -0.075 | 0.046  |
| 2.549  | 2.718  | 0.216  | -0.384 | 0.600  |
| -0.630 | -0.709 | -0.557 | 0.503  | -1.060 |
| -0.120 | 0.457  | 0.030  | 0.059  | -0.029 |
| -1.179 | 0.016  | 0.695  | -0.381 | 1.075  |
| 1.964  | 2.746  | -0.944 | -1.278 | 0.333  |
| -3.625 | -3.508 | -0.337 | -0.162 | -0.175 |
| -0.645 | -0.257 | 0.315  | -0.469 | 0.784  |
| 0.859  | -0.094 | 0.010  | 0.466  | -0.456 |
| 1.123  | -0.357 | -0.842 | 0.163  | -1.006 |
| -2.907 | -2.873 | 0.321  | -0.397 | 0.718  |
| -1.310 | -0.824 | -0.144 | -0.549 | 0.404  |
| -2.475 | -1.937 | 0.250  | -0.099 | 0.350  |
| 1.205  | 1.693  | -0.275 | 0.417  | -0.692 |
| -3.137 | -2.479 | -0.428 | -0.219 | -0.209 |
| -1.188 | -1.396 | 0.100  | -0.334 | 0.434  |

|        |        |        |        |        |
|--------|--------|--------|--------|--------|
| -0.394 | -0.697 | -0.563 | -0.560 | -0.004 |
| -1.118 | -1.305 | 0.050  | 0.595  | -0.544 |
| -1.136 | -1.473 | 0.880  | 0.804  | 0.076  |
| -1.163 | -0.866 | -0.280 | -0.833 | 0.553  |
| -1.391 | -0.818 | 0.046  | -0.229 | 0.274  |
| 1.956  | 1.153  | 0.251  | 0.110  | 0.141  |
| -1.420 | -1.341 | 0.408  | 0.362  | 0.046  |
| -1.813 | -0.955 | -0.539 | -0.702 | 0.163  |
| -0.909 | -1.331 | 0.032  | 0.175  | -0.143 |
| -0.652 | -0.744 | 0.175  | 0.012  | 0.163  |
| -1.273 | -1.529 | 1.050  | 1.653  | -0.603 |
| -1.726 | -1.580 | -0.003 | 1.064  | -1.067 |
| -2.172 | -2.024 | -0.648 | 0.981  | -1.629 |
| 1.749  | 1.297  | -0.516 | -0.230 | -0.286 |
| 2.405  | 1.349  | 0.396  | 0.697  | -0.301 |
| 0.800  | 0.120  | 0.099  | 0.106  | -0.007 |
| 1.059  | 1.171  | -0.137 | 0.075  | -0.211 |
| -1.562 | -1.864 | 0.119  | 0.570  | -0.451 |
| -0.279 | -1.230 | 0.335  | 1.187  | -0.852 |
| 0.742  | 0.130  | -0.428 | 0.746  | -1.174 |
| 0.524  | 0.147  | 0.165  | 1.063  | -0.898 |
| -1.270 | -1.419 | 0.150  | 0.831  | -0.681 |
| -4.037 | -2.881 | -0.257 | -0.822 | 0.566  |
| -3.144 | -2.811 | 0.235  | -0.268 | 0.503  |
| -1.838 | -0.943 | -1.945 | -1.191 | -0.754 |
| -1.783 | -1.543 | -0.235 | 0.127  | -0.362 |
| 1.151  | 1.019  | 0.495  | -0.196 | 0.691  |
| -3.090 | -2.535 | 0.213  | -0.434 | 0.647  |
| -1.122 | -1.432 | 0.140  | 1.663  | -1.523 |
| -0.402 | -1.117 | 0.823  | 0.857  | -0.035 |
| -1.312 | -1.465 | -0.254 | -0.564 | 0.310  |
| -1.636 | -0.763 | 0.496  | 0.347  | 0.149  |
| 0.136  | 0.535  | -0.333 | 0.282  | -0.615 |
| -0.532 | -0.125 | 0.034  | -0.726 | 0.760  |
| 0.152  | 1.477  | 0.431  | -0.153 | 0.584  |
| 0.906  | 1.035  | 0.180  | 0.229  | -0.050 |
| -0.947 | -1.109 | 0.387  | -0.375 | 0.762  |
| 0.520  | 0.919  | -0.018 | 0.549  | -0.567 |
| 2.112  | 2.007  | -0.259 | 0.090  | -0.350 |
| 1.676  | 2.111  | -0.170 | -0.448 | 0.277  |
| -1.980 | -1.411 | -0.336 | 0.320  | -0.656 |
| -0.285 | -0.394 | -0.285 | -0.701 | 0.416  |
| 1.218  | 0.489  | 0.175  | 0.277  | -0.102 |
| 0.597  | -0.407 | 0.401  | 1.352  | -0.951 |
| 1.355  | 0.133  | 0.218  | 0.189  | 0.029  |
| 1.772  | 2.101  | 0.092  | 0.010  | 0.083  |
| -0.735 | -0.493 | -0.104 | -0.563 | 0.459  |
| 0.090  | 0.573  | -0.150 | -0.707 | 0.557  |
| 1.911  | 1.681  | 0.289  | 0.117  | 0.171  |
| 1.531  | 1.835  | 0.231  | -0.317 | 0.548  |
| -2.301 | -1.938 | 0.063  | -0.843 | 0.905  |

|        |        |        |        |        |
|--------|--------|--------|--------|--------|
| -0.659 | 0.108  | -0.043 | -1.381 | 1.338  |
| 1.714  | 1.008  | 0.589  | -0.280 | 0.869  |
| -0.250 | 0.716  | -1.092 | -1.877 | 0.785  |
| 0.219  | -0.903 | 0.286  | 0.475  | -0.189 |
| -0.261 | -0.952 | -0.808 | -0.040 | -0.768 |
| -1.694 | -1.405 | -0.358 | -0.579 | 0.221  |
| -0.999 | -1.439 | 0.067  | 0.338  | -0.272 |
| -2.618 | -2.063 | -0.500 | -0.129 | -0.371 |
| -2.882 | -2.002 | -0.334 | -0.717 | 0.383  |
| -1.570 | -1.940 | 1.281  | 0.521  | 0.760  |
| 0.056  | -0.223 | 0.717  | -0.075 | 0.792  |
| 1.413  | 2.140  | 0.095  | -0.968 | 1.064  |
| 0.997  | 1.868  | 0.189  | -0.512 | 0.701  |
| -2.163 | -2.127 | 0.323  | -0.609 | 0.932  |
| 2.627  | 2.600  | -0.085 | -0.342 | 0.257  |
| 2.241  | 2.964  | -0.786 | -2.126 | 1.340  |
| -2.106 | -1.660 | -0.048 | -0.185 | 0.137  |
| -2.496 | -2.000 | -0.585 | -0.308 | -0.277 |
| -2.951 | -2.435 | -0.377 | -0.165 | -0.211 |
| -2.232 | -1.721 | -0.806 | -0.627 | -0.179 |
| -2.984 | -2.552 | 0.538  | -0.351 | 0.889  |
| -2.650 | -0.805 | -0.024 | -0.166 | 0.142  |
| -4.060 | -0.748 | -0.532 | -0.106 | -0.426 |
| -3.705 | -1.293 | -0.113 | 0.592  | -0.705 |
| 0.628  | 0.130  | -0.239 | 0.363  | -0.602 |
| 0.571  | 0.660  | 0.414  | 0.111  | 0.303  |
| 1.236  | 0.522  | -0.210 | 0.253  | -0.463 |
| -0.448 | -0.288 | 0.182  | -0.634 | 0.816  |
| -0.486 | -0.273 | 0.173  | -0.606 | 0.779  |
| -0.956 | -0.712 | -0.057 | -0.581 | 0.525  |
| -0.899 | -0.278 | 0.615  | 0.417  | 0.198  |
| -0.194 | 0.116  | 0.600  | -0.086 | 0.686  |
| -0.130 | 0.055  | 0.838  | 0.502  | 0.336  |
| -1.473 | -1.128 | 0.380  | -0.251 | 0.631  |
| -1.566 | -0.951 | 0.154  | 0.041  | 0.113  |
| -1.812 | -1.648 | 1.135  | -0.296 | 1.431  |
| -1.311 | -1.369 | 0.658  | 0.001  | 0.657  |
| -1.566 | -2.089 | 1.053  | 0.215  | 0.837  |
| -1.769 | -2.264 | 1.428  | -0.156 | 1.584  |
| -0.373 | -1.402 | 0.597  | 0.444  | 0.153  |
| -1.376 | -1.574 | 0.578  | 0.822  | -0.244 |
| -0.942 | -1.353 | 0.928  | 0.830  | 0.097  |
| -0.428 | -0.359 | 0.136  | -0.209 | 0.345  |
| 1.881  | 1.667  | -0.114 | -0.088 | -0.025 |
| -0.439 | -0.691 | 0.219  | 0.010  | 0.209  |
| 0.173  | 0.556  | 0.084  | 0.189  | -0.105 |
| 0.918  | -0.622 | -0.111 | 0.675  | -0.786 |
| 0.774  | 1.040  | -0.168 | 0.911  | -1.080 |
| 0.511  | 0.727  | -1.241 | -0.321 | -0.920 |
| -3.741 | -1.901 | -0.894 | -0.810 | -0.083 |
| -3.156 | -2.422 | -0.533 | -0.976 | 0.443  |

|        |        |        |        |        |
|--------|--------|--------|--------|--------|
| -3.168 | -2.915 | -0.226 | -0.842 | 0.615  |
| -1.376 | -0.859 | 0.165  | -0.863 | 1.028  |
| 0.396  | 0.840  | 0.133  | -0.117 | 0.250  |
| -1.657 | -0.821 | -0.273 | -0.646 | 0.373  |
| -3.628 | -2.185 | -0.010 | 1.047  | -1.057 |
| -0.686 | -0.848 | 0.270  | 0.287  | -0.017 |
| 1.534  | 0.632  | 0.463  | 0.478  | -0.015 |
| 1.033  | 1.217  | -0.036 | -0.236 | 0.200  |
| -1.053 | -0.531 | -0.591 | -0.468 | -0.122 |
| -0.441 | -0.187 | -0.107 | -0.273 | 0.166  |
| 2.629  | 1.691  | -1.087 | 0.043  | -1.130 |
| 0.421  | -0.109 | 0.670  | -0.228 | 0.898  |
| -0.853 | -0.662 | -0.338 | -0.563 | 0.225  |
| 1.473  | 1.180  | -0.089 | 0.201  | -0.289 |
| 0.511  | 0.709  | -0.442 | -0.540 | 0.098  |
| 1.001  | 1.171  | 0.224  | 0.263  | -0.039 |
| 1.607  | 1.654  | 0.383  | 0.165  | 0.218  |
| -1.069 | -0.767 | 0.224  | -0.761 | 0.985  |
| -1.474 | -1.399 | -0.098 | -0.717 | 0.619  |
| 0.408  | 1.024  | -0.225 | 0.269  | -0.493 |
| 1.205  | 1.181  | -0.054 | 0.132  | -0.186 |
| 1.518  | 0.295  | 1.188  | 1.341  | -0.153 |
| 2.579  | 1.249  | 1.911  | 1.058  | 0.853  |
| -1.453 | -1.528 | 0.262  | 0.204  | 0.058  |
| 0.044  | 0.354  | 0.261  | 0.363  | -0.102 |
| -1.928 | -1.438 | 0.128  | -0.314 | 0.441  |
| -2.205 | -1.325 | 0.274  | -0.035 | 0.309  |
| -1.233 | -0.981 | -0.156 | -0.519 | 0.362  |
| -2.601 | -2.423 | 0.662  | -0.008 | 0.670  |
| -1.200 | -1.532 | 0.221  | -0.388 | 0.609  |
| -0.226 | -0.786 | -0.012 | 0.451  | -0.463 |
| 2.145  | 2.387  | 0.532  | -0.262 | 0.795  |
| 0.043  | 0.727  | 0.040  | -0.767 | 0.808  |
| -1.455 | -2.319 | -0.014 | -0.088 | 0.074  |
| -1.450 | -0.924 | -0.133 | -0.875 | 0.742  |
| -0.760 | -1.526 | -0.299 | -0.444 | 0.145  |
| 1.084  | -0.145 | -0.026 | 0.481  | -0.507 |
| -1.731 | -1.179 | -0.190 | -0.103 | -0.087 |
| -1.732 | -1.693 | 0.025  | -0.439 | 0.464  |
| 0.451  | -0.071 | 0.106  | 0.218  | -0.113 |
| 0.149  | 0.009  | -0.078 | 0.026  | -0.104 |
| -0.433 | 0.247  | -0.366 | -0.107 | -0.260 |
| 1.226  | 1.444  | -0.062 | -0.152 | 0.090  |
| 0.812  | 1.508  | 0.282  | -0.106 | 0.388  |
| -0.256 | -0.739 | -0.126 | -0.133 | 0.007  |
| -2.271 | -1.848 | 0.024  | -0.237 | 0.261  |
| 1.195  | 1.248  | 0.625  | -0.293 | 0.918  |
| -1.516 | -0.849 | -0.611 | -0.815 | 0.204  |
| 0.395  | 1.006  | -0.141 | -0.124 | -0.017 |
| -1.261 | -1.003 | -0.340 | -0.688 | 0.348  |
| -2.616 | -2.197 | 0.038  | -0.548 | 0.587  |

|        |        |        |        |        |
|--------|--------|--------|--------|--------|
| 0.990  | 1.330  | 0.326  | 0.102  | 0.224  |
| 0.695  | 0.424  | -0.026 | -0.105 | 0.079  |
| -1.026 | -0.946 | 0.275  | -0.551 | 0.825  |
| -0.529 | -0.589 | 0.354  | -0.309 | 0.664  |
| 0.811  | 1.215  | 0.134  | -0.832 | 0.966  |
| 0.604  | 0.115  | 0.542  | 0.169  | 0.373  |
| -1.191 | -0.903 | -0.049 | -0.269 | 0.220  |
| 0.419  | 0.599  | 0.101  | -0.265 | 0.367  |
| -0.198 | 0.240  | -0.070 | -0.138 | 0.068  |
| -0.624 | -1.218 | -0.603 | -0.135 | -0.467 |
| -0.734 | -1.210 | -0.880 | -0.124 | -0.756 |
| -0.957 | -1.448 | -2.466 | -1.707 | -0.760 |
| 2.024  | 1.524  | 0.303  | -0.032 | 0.335  |
| -1.068 | -0.468 | 0.114  | 0.012  | 0.101  |
| -0.377 | -0.971 | -0.033 | -0.400 | 0.367  |
| -1.429 | -1.235 | 0.342  | 0.264  | 0.077  |
| 1.729  | 0.342  | 0.460  | 0.383  | 0.077  |
| -0.400 | -0.172 | -1.031 | -0.474 | -0.558 |
| -0.585 | -0.864 | 0.069  | 0.276  | -0.208 |
| 2.349  | 2.515  | -0.097 | -0.092 | -0.006 |
| 1.121  | -0.013 | -0.066 | 0.170  | -0.237 |
| 1.179  | 0.118  | 0.306  | 0.401  | -0.094 |
| -0.079 | -0.894 | 0.222  | 0.518  | -0.296 |
| 0.086  | 0.103  | 0.470  | 0.078  | 0.391  |
| 1.359  | 1.071  | -0.051 | 0.279  | -0.330 |
| 1.299  | 1.576  | 0.592  | 0.195  | 0.396  |
| -0.016 | 0.164  | 0.291  | -0.258 | 0.549  |
| 0.896  | -0.154 | 0.189  | 0.533  | -0.345 |
| 0.640  | 0.805  | 0.185  | -0.200 | 0.385  |
| -0.714 | -0.484 | 0.502  | 0.336  | 0.165  |
| 1.095  | 0.271  | 0.470  | 0.489  | -0.020 |
| 1.657  | 0.692  | 0.770  | 0.715  | 0.055  |
| 0.827  | 0.191  | 0.381  | 0.325  | 0.056  |
| 0.500  | 0.409  | 0.073  | 0.337  | -0.264 |
| 0.952  | 0.622  | 0.451  | 0.232  | 0.219  |
| 1.436  | 1.044  | 0.380  | 0.115  | 0.265  |
| -2.153 | -2.326 | -0.263 | -0.314 | 0.051  |
| 1.377  | 1.781  | 0.710  | 0.253  | 0.457  |
| -0.126 | -0.073 | 0.695  | 0.066  | 0.629  |
| 0.996  | 0.117  | -0.284 | 1.074  | -1.358 |
| -0.019 | -0.136 | -0.392 | -0.214 | -0.178 |
| 1.337  | 1.876  | 0.462  | -0.030 | 0.492  |
| -1.860 | -1.052 | 0.172  | -0.119 | 0.291  |
| -0.187 | -0.552 | 0.046  | -0.267 | 0.313  |
| 1.540  | 0.398  | -0.025 | 0.361  | -0.386 |
| -1.072 | -0.763 | 0.022  | 0.095  | -0.073 |
| 0.531  | 0.231  | 0.307  | -0.107 | 0.414  |
| 1.184  | 1.618  | 0.028  | -0.729 | 0.757  |
| 2.845  | 2.195  | 0.316  | 0.022  | 0.294  |
| 2.196  | 2.381  | 0.786  | -0.187 | 0.973  |
| -1.971 | -1.545 | 0.339  | -0.363 | 0.703  |



|        |        |        |        |        |
|--------|--------|--------|--------|--------|
| -1.120 | -1.073 | 0.732  | 0.283  | 0.449  |
| 0.203  | 0.355  | -0.205 | -0.311 | 0.106  |
| 2.615  | 2.252  | 0.001  | 0.201  | -0.200 |
| 2.195  | 1.754  | -0.782 | -0.841 | 0.059  |
| 0.271  | 1.615  | -0.089 | -0.725 | 0.635  |
| 0.880  | 1.237  | 0.155  | -0.912 | 1.067  |
| -0.714 | -0.497 | 0.435  | -0.102 | 0.537  |
| -1.134 | -0.898 | 0.075  | -0.597 | 0.672  |
| -1.779 | -1.177 | 0.442  | -0.173 | 0.615  |
| -1.394 | -1.097 | -0.161 | -0.062 | -0.099 |
| 1.749  | 1.874  | -0.088 | 0.309  | -0.397 |
| 1.140  | 2.089  | 0.292  | -0.606 | 0.898  |
| -1.652 | -1.758 | 0.286  | -0.143 | 0.429  |
| -1.837 | -1.425 | -0.040 | -0.879 | 0.839  |
| 2.412  | 2.311  | 0.182  | 0.327  | -0.145 |
| 0.870  | -0.661 | 0.053  | 0.055  | -0.002 |
| -0.218 | -1.136 | -0.120 | 0.373  | -0.493 |
| -0.127 | 0.025  | 0.177  | 0.108  | 0.069  |
| -0.934 | -0.401 | -0.336 | -0.911 | 0.575  |
| -0.883 | -0.693 | 0.576  | -0.299 | 0.875  |
| 0.549  | 1.054  | -0.259 | 0.050  | -0.309 |
| 1.459  | 1.886  | 0.100  | 0.141  | -0.041 |
| 1.580  | 0.399  | -0.060 | 0.812  | -0.872 |
| -1.498 | -1.539 | 0.832  | -0.279 | 1.111  |
| 1.589  | 0.135  | -0.305 | 0.493  | -0.798 |
| -0.184 | -0.949 | -0.545 | 0.550  | -1.095 |
| -1.847 | -1.477 | 0.706  | -0.685 | 1.391  |
| -3.007 | -3.027 | 0.275  | 0.004  | 0.271  |
| 0.270  | 0.455  | 0.031  | 0.218  | -0.187 |
| 1.581  | 0.388  | -0.092 | 0.417  | -0.509 |
| -1.846 | -0.445 | -0.352 | -0.349 | -0.004 |
| -2.629 | -2.159 | -0.339 | -0.479 | 0.140  |
| -2.489 | -1.569 | -0.003 | -0.747 | 0.744  |
| -0.491 | 0.070  | -0.092 | -0.238 | 0.146  |
| 0.250  | 0.330  | -0.815 | -0.778 | -0.037 |
| 0.817  | 0.893  | 0.017  | -0.069 | 0.086  |
| 1.325  | 1.636  | 0.195  | -0.419 | 0.614  |
| 1.523  | 1.070  | -0.624 | 0.201  | -0.826 |
| 0.720  | 0.349  | 0.290  | 0.746  | -0.456 |
| 0.266  | 0.857  | -0.106 | -0.012 | -0.094 |
| 2.525  | 2.778  | -0.423 | -0.594 | 0.171  |
| 2.362  | 1.725  | -0.314 | -0.285 | -0.028 |
| -1.285 | -0.864 | -0.058 | 0.248  | -0.307 |
| -0.192 | -0.558 | 0.000  | 0.391  | -0.391 |
| 1.607  | 1.697  | 0.087  | 0.273  | -0.186 |
| 0.745  | -0.275 | -0.009 | 0.067  | -0.076 |
| -0.092 | 0.174  | 0.156  | 0.020  | 0.136  |
| 1.717  | 1.006  | -0.593 | -0.347 | -0.246 |
| 0.314  | 0.966  | -0.506 | -0.318 | -0.188 |
| 1.275  | 1.278  | 0.298  | 0.049  | 0.249  |
| 0.989  | 0.564  | -0.047 | 0.248  | -0.295 |

|        |        |        |        |        |
|--------|--------|--------|--------|--------|
| 0.784  | -0.154 | 0.668  | 0.326  | 0.342  |
| 1.053  | 1.238  | -0.300 | 0.048  | -0.348 |
| -1.654 | -1.896 | -0.319 | -0.143 | -0.175 |
| 1.281  | 1.655  | -0.654 | -1.039 | 0.385  |
| 0.580  | -0.053 | 0.096  | -0.407 | 0.502  |
| 0.378  | 0.164  | 0.269  | 0.530  | -0.262 |
| 0.300  | 0.598  | -0.053 | -0.412 | 0.359  |
| 0.832  | 1.207  | 0.555  | -0.126 | 0.681  |
| 0.486  | 0.851  | -1.485 | -1.070 | -0.415 |
| 1.592  | 0.675  | 0.077  | -0.004 | 0.081  |
| 0.740  | 0.906  | -1.204 | -0.676 | -0.528 |
| -2.009 | -1.410 | 0.002  | -1.095 | 1.097  |
| 2.222  | 1.630  | -0.754 | -0.457 | -0.297 |
| 1.294  | 2.511  | 0.122  | -0.348 | 0.471  |
| 0.775  | 0.932  | 0.098  | 0.393  | -0.295 |
| 2.587  | 2.110  | 0.387  | -0.157 | 0.544  |
| -1.891 | -1.580 | 0.060  | -0.676 | 0.736  |
| 1.703  | 2.067  | -0.418 | -0.873 | 0.455  |
| 2.208  | 2.499  | -0.281 | -1.038 | 0.757  |
| 1.460  | 2.152  | -0.197 | -1.107 | 0.909  |
| -1.896 | -0.877 | -0.231 | 0.354  | -0.584 |
| 1.981  | 1.692  | 0.195  | 0.368  | -0.173 |
| 0.521  | 0.917  | 0.217  | 0.192  | 0.025  |
| 1.673  | 1.416  | -0.196 | -0.389 | 0.193  |
| 2.327  | 1.815  | 0.144  | -0.137 | 0.281  |
| 1.684  | 1.165  | 0.170  | -0.057 | 0.227  |
| -0.301 | -0.774 | 0.110  | -0.001 | 0.111  |
| 1.048  | 1.148  | 0.064  | 0.331  | -0.267 |
| -1.578 | -1.248 | -0.437 | -0.213 | -0.225 |
| -0.311 | 0.195  | 0.168  | 0.161  | 0.007  |
| 0.087  | -0.904 | 0.111  | 0.365  | -0.255 |
| -1.334 | -0.889 | 0.235  | -0.544 | 0.780  |
| 1.930  | 1.503  | 0.342  | 0.599  | -0.257 |
| 0.969  | 1.160  | -0.038 | 0.276  | -0.314 |
| -0.635 | -0.542 | -0.054 | 0.166  | -0.220 |
| -0.889 | -0.134 | -0.441 | -0.619 | 0.179  |
| -1.352 | -0.503 | 0.446  | -0.080 | 0.526  |
| 0.250  | -0.483 | -0.261 | -0.138 | -0.123 |
| -0.065 | -0.419 | 0.049  | -0.040 | 0.089  |
| -1.337 | -0.944 | -0.315 | -0.738 | 0.423  |
| 0.160  | 0.269  | 0.299  | -0.585 | 0.884  |
| -0.165 | -0.462 | -0.383 | -0.525 | 0.141  |
| 2.697  | 2.295  | 0.510  | 0.101  | 0.410  |
| 2.489  | 2.298  | 0.240  | 0.123  | 0.117  |
| 3.111  | 2.103  | 1.105  | 0.674  | 0.431  |
| 2.937  | 2.025  | 0.897  | 0.558  | 0.339  |
| -1.254 | -0.910 | 0.173  | 0.025  | 0.148  |
| -0.293 | 0.284  | -0.703 | -0.600 | -0.103 |
| 1.610  | 2.472  | 0.032  | -1.231 | 1.263  |
| 0.462  | 0.928  | -0.254 | -0.445 | 0.190  |
| 0.710  | 0.921  | -0.137 | -0.856 | 0.718  |

|        |        |        |        |        |
|--------|--------|--------|--------|--------|
| -1.023 | -0.545 | -0.235 | -0.161 | -0.074 |
| -0.867 | -0.320 | -0.731 | -0.310 | -0.420 |
| 2.470  | 2.397  | 0.533  | -0.325 | 0.859  |
| 1.950  | 2.331  | 0.127  | -0.555 | 0.682  |
| 0.148  | 0.167  | -0.363 | 0.029  | -0.392 |
| 1.387  | 2.054  | 0.482  | 0.167  | 0.316  |
| 1.720  | 0.921  | -0.161 | -0.004 | -0.157 |
| -1.739 | -0.976 | -0.481 | -0.593 | 0.112  |
| 1.084  | 1.270  | -0.692 | -0.654 | -0.038 |
| -1.237 | -0.908 | 0.444  | 0.096  | 0.348  |
| 1.279  | 0.907  | 0.541  | -0.052 | 0.593  |
| 1.056  | 1.270  | -0.555 | -0.417 | -0.138 |
| 2.145  | 1.348  | -1.067 | -0.338 | -0.729 |
| 2.044  | 1.817  | -0.218 | 0.011  | -0.229 |
| 0.198  | -0.544 | 0.438  | 0.233  | 0.204  |
| 1.018  | 1.085  | -0.063 | -0.375 | 0.312  |
| 2.453  | 3.207  | 0.415  | -0.135 | 0.550  |
| -0.420 | -0.271 | 0.186  | 0.061  | 0.125  |
| -0.204 | -0.630 | 0.161  | -0.159 | 0.320  |
| 0.755  | -0.696 | 0.123  | 0.304  | -0.181 |
| -3.740 | -2.539 | -0.582 | -0.264 | -0.318 |
| -0.801 | -0.628 | -0.547 | -0.591 | 0.043  |
| -0.289 | -0.109 | -0.036 | -0.856 | 0.820  |
| -0.708 | -0.927 | -0.177 | 0.287  | -0.464 |
| -0.470 | -0.753 | -0.811 | -0.140 | -0.671 |
| 0.726  | 1.104  | 0.168  | 0.380  | -0.213 |
| 1.353  | 1.207  | 0.139  | -0.402 | 0.541  |
| 1.244  | 0.782  | 0.565  | 0.718  | -0.153 |
| 1.078  | 1.121  | 0.140  | 0.385  | -0.245 |
| 0.339  | 0.885  | 0.088  | 0.230  | -0.142 |
| -0.125 | 0.112  | 0.526  | -0.007 | 0.533  |
| 0.844  | 0.456  | 0.267  | 0.320  | -0.053 |
| 1.227  | 0.585  | 0.370  | 0.551  | -0.182 |
| 1.512  | 0.977  | 0.310  | 0.638  | -0.328 |
| -0.302 | -0.029 | 0.026  | 0.002  | 0.024  |
| 3.181  | 2.282  | 0.299  | 0.269  | 0.029  |
| -0.454 | 1.198  | -0.374 | -0.658 | 0.284  |
| 1.508  | 1.717  | 0.753  | 0.196  | 0.557  |
| 0.637  | 0.278  | -0.378 | -0.112 | -0.266 |
| 1.058  | 1.097  | 0.363  | 0.257  | 0.106  |
| 0.377  | 0.703  | 0.540  | -0.661 | 1.201  |
| -1.519 | -1.219 | -0.178 | -0.143 | -0.035 |
| -0.473 | -0.176 | -0.381 | -0.053 | -0.328 |
| 0.700  | 0.807  | 0.212  | 0.236  | -0.024 |
| -1.549 | -0.704 | -0.240 | 0.006  | -0.247 |
| -1.778 | -2.211 | 0.059  | 0.588  | -0.529 |
| 2.104  | 1.879  | -0.129 | 0.112  | -0.241 |
| 1.490  | 1.616  | 0.317  | 0.249  | 0.068  |
| -3.072 | -3.078 | 0.687  | -0.480 | 1.167  |
| -0.832 | -0.675 | 0.162  | 0.002  | 0.160  |
| -0.163 | -0.424 | 0.427  | -0.201 | 0.628  |

|        |        |        |        |        |
|--------|--------|--------|--------|--------|
| 0.364  | 0.641  | -0.116 | -0.047 | -0.069 |
| -1.478 | -0.845 | -0.188 | -0.419 | 0.232  |
| 0.576  | -0.427 | -0.316 | 0.228  | -0.543 |
| 0.837  | 0.893  | -0.086 | -0.204 | 0.118  |
| 1.874  | 1.031  | 0.338  | 0.623  | -0.285 |
| 2.271  | 2.249  | 0.088  | -0.102 | 0.190  |
| 0.667  | 0.684  | 0.442  | 0.007  | 0.434  |
| 0.464  | 1.125  | -0.035 | -0.289 | 0.255  |
| 1.027  | 0.902  | -0.369 | -0.407 | 0.038  |
| 0.353  | 0.447  | -0.445 | 0.091  | -0.536 |
| 1.285  | 1.382  | 0.477  | 0.079  | 0.397  |
| 0.882  | 0.529  | 0.249  | 0.136  | 0.113  |
| 0.933  | 0.735  | 0.018  | 0.177  | -0.159 |
| 1.037  | 0.802  | 0.096  | 0.291  | -0.195 |
| 0.290  | -0.713 | -0.216 | 0.112  | -0.328 |
| 1.084  | 1.235  | -0.706 | -0.766 | 0.060  |
| 0.869  | -0.453 | 0.299  | 0.289  | 0.010  |
| 0.874  | 0.935  | 0.945  | -0.028 | 0.973  |
| 0.953  | 0.254  | 0.017  | 0.379  | -0.362 |
| -0.428 | -1.249 | 0.036  | 0.226  | -0.190 |
| -0.713 | 0.263  | -0.239 | -0.184 | -0.054 |
| 0.929  | 0.643  | 1.186  | 0.465  | 0.721  |
| 0.944  | 0.966  | 0.259  | 1.153  | -0.894 |
| 1.007  | 0.093  | -0.276 | -0.315 | 0.040  |
| 2.254  | 0.818  | 0.635  | 0.275  | 0.360  |
| 0.348  | 0.802  | 0.899  | 0.355  | 0.544  |
| 0.513  | 0.365  | 0.490  | 0.080  | 0.410  |
| 0.097  | 0.523  | -0.033 | 0.079  | -0.112 |
| 1.045  | 0.724  | 0.299  | 0.689  | -0.390 |
| 0.263  | 0.915  | 0.162  | -0.309 | 0.471  |
| 1.731  | 1.006  | 0.391  | 0.436  | -0.045 |
| -0.626 | -0.781 | 0.489  | 0.362  | 0.128  |
| 1.067  | -0.424 | -0.232 | 0.117  | -0.348 |
| 1.125  | 0.386  | 0.454  | 0.782  | -0.328 |
| -1.590 | -1.983 | -0.230 | -0.271 | 0.041  |
| 1.259  | 0.938  | 0.856  | 0.476  | 0.381  |
| 2.076  | 2.229  | -0.027 | 0.508  | -0.536 |
| -1.356 | -1.353 | -0.314 | 0.036  | -0.350 |
| 0.206  | -0.012 | -0.243 | -0.086 | -0.158 |
| 1.761  | 1.151  | -0.168 | 0.282  | -0.450 |
| -0.043 | 0.190  | 0.381  | -0.194 | 0.575  |
| -0.526 | -1.162 | -0.396 | 0.005  | -0.401 |
| 0.784  | 0.299  | 0.270  | 0.212  | 0.059  |
| 2.057  | 1.119  | 0.434  | 0.469  | -0.035 |
| 0.219  | -1.094 | 0.189  | 0.205  | -0.016 |
| 1.874  | 0.942  | -0.270 | 0.102  | -0.372 |
| -0.363 | -0.775 | -0.236 | 0.261  | -0.496 |
| 1.165  | -0.207 | 0.422  | 0.232  | 0.190  |
| 0.258  | 1.153  | -0.172 | -0.206 | 0.034  |
| -0.750 | -1.826 | 0.393  | 0.366  | 0.028  |
| 1.225  | 1.408  | -0.176 | 0.433  | -0.609 |
| -0.835 | -1.189 | 0.497  | 0.477  | 0.020  |

|        |        |        |        |        |
|--------|--------|--------|--------|--------|
| -0.551 | -0.725 | 0.448  | 0.437  | 0.012  |
| 0.542  | 0.708  | -0.098 | -0.239 | 0.140  |
| 0.645  | 1.066  | -0.282 | 0.070  | -0.353 |
| -1.462 | -2.151 | -0.054 | -0.373 | 0.319  |
| 0.295  | -0.987 | 0.090  | -0.240 | 0.330  |
| 1.052  | 0.695  | 0.450  | 0.587  | -0.138 |
| 1.319  | 0.480  | 0.645  | -0.086 | 0.731  |
| 2.388  | 1.095  | -0.248 | -0.358 | 0.109  |
| -0.168 | -0.571 | 0.581  | -0.104 | 0.685  |
| 1.944  | 1.136  | -0.117 | 0.220  | -0.337 |
| 3.648  | 2.699  | 0.364  | -0.263 | 0.627  |
| -1.346 | -1.111 | 0.278  | 0.255  | 0.023  |
| 1.328  | 1.620  | 0.064  | -0.726 | 0.790  |
| 1.094  | 1.022  | 0.213  | 0.232  | -0.020 |
| 1.000  | 0.734  | 0.050  | 0.887  | -0.837 |
| -0.455 | -1.050 | 0.239  | 0.360  | -0.121 |
| 1.601  | 1.205  | 0.215  | 0.147  | 0.068  |
| -0.016 | -0.019 | 0.035  | 0.516  | -0.481 |
| -0.062 | -0.382 | 0.313  | 0.531  | -0.218 |
| -0.564 | -0.907 | 0.208  | 0.369  | -0.162 |
| 0.403  | 0.324  | 0.135  | 0.327  | -0.192 |
| 0.077  | -0.545 | 0.542  | 0.474  | 0.068  |
| 0.049  | -0.022 | -0.130 | -0.191 | 0.061  |
| 1.327  | 1.047  | 0.691  | 0.690  | 0.001  |
| -1.535 | -0.888 | 0.058  | -0.022 | 0.080  |
| 0.272  | 0.135  | 0.166  | 0.239  | -0.073 |
| -1.594 | -1.225 | 0.014  | 0.599  | -0.585 |
| -0.185 | -0.217 | 0.300  | 0.572  | -0.272 |
| -1.804 | -1.518 | 0.161  | -0.182 | 0.343  |
| -0.919 | -1.431 | -0.061 | -0.006 | -0.054 |
| 1.575  | 1.403  | 1.355  | 0.779  | 0.576  |
| 0.886  | 1.301  | -0.247 | -0.462 | 0.215  |
| 1.591  | 1.751  | -0.717 | -0.110 | -0.607 |
| 0.114  | -0.808 | 0.091  | 0.513  | -0.422 |
| 0.403  | 0.192  | 0.298  | 0.131  | 0.167  |
| -0.947 | -0.685 | 1.142  | 0.844  | 0.298  |
| 2.046  | 2.229  | 0.156  | 0.283  | -0.126 |
| 1.277  | 1.122  | 0.702  | 0.197  | 0.506  |
| 0.008  | -0.127 | 0.416  | 0.964  | -0.547 |
| -1.347 | -1.659 | -0.199 | 0.908  | -1.107 |
| 0.033  | 0.220  | 0.458  | 0.003  | 0.455  |
| 0.192  | 0.543  | 1.475  | -0.131 | 1.606  |
| 0.417  | 0.746  | 0.923  | 0.546  | 0.377  |
| 0.245  | 0.714  | 0.229  | -0.196 | 0.425  |
| -1.599 | -1.227 | 0.197  | -0.212 | 0.409  |
| -1.311 | -1.417 | 0.338  | -0.236 | 0.574  |
| 0.807  | 0.589  | 0.217  | 0.339  | -0.122 |
| 1.833  | 0.572  | 0.011  | 0.041  | -0.030 |
| -0.988 | -0.747 | 0.335  | -0.200 | 0.534  |
| -2.572 | -1.721 | 0.293  | -0.553 | 0.845  |
| -1.172 | -1.075 | 0.279  | 0.141  | 0.138  |

|        |        |        |        |        |
|--------|--------|--------|--------|--------|
| -1.377 | -0.492 | 0.153  | -0.271 | 0.425  |
| 2.701  | 2.569  | -0.038 | -0.122 | 0.084  |
| 2.616  | 1.885  | -0.031 | -0.274 | 0.244  |
| 1.801  | 1.803  | 0.124  | 0.265  | -0.141 |
| 1.099  | 1.680  | -0.473 | -0.557 | 0.083  |
| -1.201 | 0.357  | -1.157 | -1.988 | 0.831  |
| 1.854  | 1.001  | 0.291  | 0.134  | 0.157  |
| 3.461  | 2.732  | -1.217 | -1.178 | -0.039 |
| -0.391 | -0.263 | -0.439 | -0.054 | -0.385 |
| 2.026  | 1.150  | -0.203 | -0.458 | 0.255  |
| 2.450  | 2.001  | -0.465 | 0.275  | -0.740 |
| 2.200  | 1.483  | -0.329 | -0.379 | 0.050  |
| 0.757  | -0.156 | -0.873 | -0.299 | -0.574 |
| -0.009 | -0.464 | 0.390  | -0.263 | 0.653  |
| -2.489 | -2.067 | 0.177  | -0.225 | 0.402  |
| -0.002 | 0.708  | 0.180  | -0.107 | 0.287  |
| 2.238  | 1.220  | 0.736  | 0.300  | 0.436  |
| -0.984 | -0.821 | 0.981  | -0.161 | 1.142  |
| 3.700  | 1.976  | 1.040  | -0.305 | 1.345  |
| 0.624  | 0.104  | -0.025 | 0.503  | -0.528 |
| 2.426  | 1.702  | 0.099  | 0.420  | -0.321 |
| 3.282  | 1.613  | 0.105  | -0.108 | 0.213  |
| -1.203 | -0.625 | 0.292  | -0.684 | 0.977  |
| 2.396  | 2.034  | 0.402  | 0.173  | 0.229  |
| 0.623  | 0.201  | -0.255 | -0.567 | 0.312  |
| 1.481  | 1.762  | -0.083 | -0.001 | -0.082 |
| 1.737  | 1.588  | 0.135  | -0.305 | 0.441  |
| 1.512  | 1.587  | 0.854  | 0.058  | 0.796  |
| 2.234  | 1.365  | -0.020 | -0.086 | 0.067  |
| 1.760  | 1.917  | 0.312  | -0.495 | 0.807  |
| 1.294  | 1.701  | 0.546  | -0.277 | 0.823  |
| 2.619  | 1.646  | -0.025 | 0.043  | -0.067 |
| 0.668  | 1.119  | -0.496 | -0.139 | -0.357 |
| -1.874 | -1.865 | -0.593 | -1.018 | 0.426  |
| 2.030  | 2.297  | 0.168  | -0.641 | 0.808  |
| 1.140  | 0.338  | 0.326  | 0.260  | 0.066  |
| 0.364  | -0.164 | 0.209  | -0.159 | 0.368  |
| 1.928  | 0.883  | 0.257  | 0.141  | 0.116  |
| 3.196  | 2.155  | 0.626  | 0.265  | 0.361  |
| 1.287  | 0.316  | -0.112 | 0.083  | -0.196 |
| 1.195  | 0.575  | 0.338  | 0.391  | -0.052 |
| -0.125 | -0.999 | 0.052  | 0.934  | -0.882 |
| 1.615  | 0.936  | 0.365  | 0.936  | -0.571 |
| -0.448 | -0.569 | 0.031  | 0.070  | -0.039 |
| 1.547  | -0.466 | 0.848  | 0.946  | -0.098 |
| 0.350  | 0.209  | 0.282  | 0.042  | 0.240  |
| 0.669  | 0.626  | -0.403 | 0.291  | -0.693 |
| -0.982 | -0.684 | -0.020 | -0.340 | 0.320  |
| -1.789 | -2.605 | -0.089 | -0.059 | -0.030 |
| 0.031  | 0.524  | -0.240 | 0.056  | -0.296 |
| -0.307 | -0.524 | 1.134  | 0.244  | 0.891  |

|        |        |        |        |        |
|--------|--------|--------|--------|--------|
| -0.830 | 0.370  | -0.051 | 0.140  | -0.190 |
| -0.427 | -1.322 | -0.703 | -0.085 | -0.617 |
| -2.128 | -2.881 | -0.094 | 0.198  | -0.292 |
| -1.651 | 0.110  | -0.451 | -1.211 | 0.760  |
| -2.477 | -1.949 | -1.840 | -0.437 | -1.404 |
| -1.751 | -1.184 | -0.583 | 0.854  | -1.437 |
| -2.375 | -1.645 | -0.238 | -0.234 | -0.004 |
| -2.492 | -2.046 | 0.023  | 0.796  | -0.773 |
| -0.010 | 0.177  | -0.124 | 0.078  | -0.202 |
| -4.197 | -3.185 | -0.065 | -0.527 | 0.462  |
| 0.286  | 0.522  | 0.159  | -0.044 | 0.203  |
| -3.007 | -2.869 | 0.295  | 1.047  | -0.751 |
| -2.620 | -1.910 | 0.178  | -0.919 | 1.097  |
| -0.997 | -1.133 | -0.119 | -0.559 | 0.440  |
| -0.594 | 0.150  | -1.260 | -0.087 | -1.173 |
| -0.206 | -0.760 | 0.345  | 0.503  | -0.157 |
| 1.263  | 1.641  | 0.142  | 0.033  | 0.110  |
| 0.575  | 0.251  | 0.364  | 0.337  | 0.027  |
| 1.091  | -0.071 | 0.016  | -0.219 | 0.234  |
| 1.216  | 0.903  | 0.484  | 0.337  | 0.147  |
| -2.290 | -2.428 | 0.256  | -0.160 | 0.417  |
| -3.362 | -2.711 | 0.143  | -0.544 | 0.687  |
| -0.958 | -0.350 | 0.128  | -0.072 | 0.199  |
| 0.653  | 0.371  | -0.431 | 0.508  | -0.940 |
| -0.996 | -0.561 | -0.832 | 0.328  | -1.160 |
| -0.777 | -0.443 | -1.861 | -0.330 | -1.531 |
| 0.539  | 0.470  | -0.509 | 0.446  | -0.955 |
| -0.551 | 0.003  | -0.285 | 0.062  | -0.347 |
| -1.570 | -0.402 | -0.263 | 0.147  | -0.409 |
| -0.184 | -0.544 | 0.148  | 0.587  | -0.438 |
| -2.058 | -1.589 | 0.219  | -0.568 | 0.787  |
| -1.737 | -1.125 | -0.275 | -0.467 | 0.193  |
| -1.660 | -2.164 | -1.345 | -0.329 | -1.016 |
| -0.001 | -1.416 | -0.398 | 0.069  | -0.467 |
| -0.146 | -0.145 | 0.286  | 0.026  | 0.261  |
| -1.384 | -1.391 | 0.384  | 0.246  | 0.138  |
| -1.890 | -1.989 | -0.539 | -0.284 | -0.255 |
| -1.922 | -2.174 | -0.256 | 0.053  | -0.309 |
| 1.048  | 1.668  | -0.338 | -0.047 | -0.292 |
| 0.433  | -0.210 | 0.156  | -0.154 | 0.310  |
| 0.536  | -0.745 | 0.302  | 0.664  | -0.362 |
| 0.409  | 0.061  | -0.328 | -0.363 | 0.034  |
| 1.676  | 2.068  | 0.348  | -0.424 | 0.772  |
| -2.646 | -2.422 | 0.668  | 0.571  | 0.097  |
| 0.296  | -0.194 | -0.038 | 0.407  | -0.445 |
| 0.970  | 0.953  | -0.419 | 0.588  | -1.008 |
| -2.337 | -1.587 | -0.083 | -0.107 | 0.024  |
| -2.442 | -2.111 | 0.325  | 0.341  | -0.016 |
| 2.578  | 1.402  | 0.463  | 0.608  | -0.145 |
| 2.396  | 2.178  | -0.193 | -0.464 | 0.271  |
| -0.506 | -0.367 | -0.600 | -0.456 | -0.144 |

|        |        |        |        |        |
|--------|--------|--------|--------|--------|
| 0.596  | -0.679 | 0.087  | 0.130  | -0.043 |
| 0.265  | -1.123 | 0.460  | -0.211 | 0.671  |
| -1.548 | -0.906 | 0.063  | -0.301 | 0.364  |
| 2.611  | 2.209  | 0.446  | 0.011  | 0.435  |
| 0.847  | 0.636  | 0.345  | -0.378 | 0.723  |
| 0.223  | 0.779  | 0.050  | -0.340 | 0.389  |
| -1.458 | -1.516 | 0.458  | 0.790  | -0.332 |
| -0.943 | -0.947 | 0.000  | 0.356  | -0.356 |
| -0.463 | -0.060 | 0.287  | -0.475 | 0.762  |
| 1.567  | 1.454  | 0.333  | 0.000  | 0.332  |
| -1.540 | -1.321 | -0.131 | -0.228 | 0.098  |
| 0.922  | 1.116  | 0.102  | -0.243 | 0.346  |
| 0.885  | 2.353  | 0.338  | -0.486 | 0.824  |
| 2.475  | 2.426  | 0.258  | 0.361  | -0.102 |
| -0.208 | 0.203  | -0.294 | -0.667 | 0.373  |
| 2.833  | 1.245  | -0.009 | 0.188  | -0.197 |
| -2.309 | -1.100 | 0.136  | -0.520 | 0.656  |
| -1.285 | -0.192 | 0.230  | -0.095 | 0.325  |
| 1.890  | 2.178  | -0.348 | -0.653 | 0.306  |
| -2.337 | -2.073 | 0.429  | 0.362  | 0.067  |
| 1.101  | -0.251 | 0.469  | 0.390  | 0.079  |
| -0.274 | 0.039  | -0.118 | -0.052 | -0.066 |
| -0.742 | -0.683 | -0.571 | -0.222 | -0.348 |
| 0.044  | 0.167  | 0.405  | -0.196 | 0.601  |
| 1.411  | 1.811  | -0.430 | -0.399 | -0.030 |
| 0.113  | 0.546  | -0.386 | -0.198 | -0.188 |
| 0.099  | 0.321  | 0.039  | 0.624  | -0.585 |
| -0.642 | -0.669 | -0.132 | -0.852 | 0.720  |
| -3.714 | -3.059 | -0.513 | -0.518 | 0.005  |
| -2.981 | -2.727 | -0.533 | -0.574 | 0.041  |
| 0.933  | 1.501  | 0.047  | -0.269 | 0.317  |
| 0.119  | -0.168 | 0.359  | 0.160  | 0.199  |
| 1.454  | 1.163  | 0.254  | -0.539 | 0.793  |
| -0.874 | 0.083  | -0.140 | -0.126 | -0.014 |
| 2.691  | 1.272  | 0.036  | 0.209  | -0.173 |
| 0.520  | 0.320  | -0.728 | -0.489 | -0.240 |
| 2.559  | 2.012  | -0.415 | 0.048  | -0.463 |
| -1.880 | -1.552 | -0.084 | -0.800 | 0.716  |
| 0.779  | 0.779  | 0.561  | -0.522 | 1.083  |
| 1.304  | 1.796  | 0.124  | 0.035  | 0.089  |
| -1.619 | -1.882 | 0.046  | -0.586 | 0.633  |
| 2.518  | 0.692  | 0.421  | 0.709  | -0.288 |
| -1.913 | -1.203 | 0.083  | 0.159  | -0.076 |
| 1.261  | 1.112  | 0.040  | -0.008 | 0.048  |
| 2.172  | 1.471  | 0.385  | 0.265  | 0.120  |
| 0.649  | -0.145 | 0.303  | 0.766  | -0.463 |
| 0.046  | -0.271 | -0.229 | 0.470  | -0.698 |
| 2.135  | 1.890  | -0.510 | 0.023  | -0.534 |
| -0.879 | 0.242  | -0.237 | -0.727 | 0.491  |
| -1.191 | -0.409 | -1.269 | -1.620 | 0.351  |
| 0.966  | 1.267  | 0.484  | 0.248  | 0.236  |



|        |        |        |        |        |
|--------|--------|--------|--------|--------|
| -1.926 | -2.507 | -1.056 | -0.113 | -0.944 |
| -1.975 | -1.155 | 0.201  | -0.815 | 1.017  |
| 0.397  | 0.024  | -0.084 | -0.268 | 0.184  |
| 0.903  | 0.243  | 0.058  | 0.173  | -0.115 |
| -2.847 | -2.419 | 0.413  | -0.348 | 0.760  |
| -0.810 | -1.791 | 0.045  | -0.609 | 0.654  |
| 0.186  | -0.790 | 0.483  | 0.300  | 0.183  |
| -1.906 | -1.420 | 0.096  | -0.166 | 0.262  |
| 1.649  | 1.746  | 1.256  | 0.124  | 1.132  |
| -2.360 | -1.856 | -0.156 | -2.206 | 2.049  |
| -0.629 | -0.065 | -0.050 | -0.526 | 0.476  |
| -0.795 | -0.299 | 0.564  | -0.142 | 0.706  |
| -0.151 | 0.249  | 0.055  | 0.159  | -0.105 |
| 1.141  | 1.312  | -0.907 | -0.419 | -0.489 |
| 2.161  | 2.101  | 0.293  | -0.679 | 0.972  |
| -2.522 | -2.311 | -0.504 | -0.366 | -0.138 |
| 2.522  | 2.403  | -1.091 | -0.786 | -0.304 |
| -1.527 | -1.419 | 0.659  | -0.973 | 1.631  |
| 1.958  | 1.513  | 0.657  | 0.354  | 0.303  |
| -0.705 | -1.264 | -0.487 | 0.115  | -0.602 |
| 1.373  | 1.196  | 1.323  | 0.400  | 0.923  |
| 1.070  | 0.971  | 0.620  | -0.590 | 1.210  |
| -1.293 | -1.227 | -0.018 | -0.259 | 0.242  |
| -1.341 | -1.815 | 0.317  | -1.034 | 1.351  |
| -1.620 | -1.480 | 0.417  | -0.357 | 0.774  |
| -1.415 | -0.529 | -0.116 | -0.312 | 0.197  |
| -0.074 | -1.524 | -0.452 | 0.049  | -0.502 |
| -1.505 | -0.967 | -0.300 | -0.381 | 0.082  |
| 1.933  | 1.496  | 0.437  | 0.036  | 0.401  |
| 1.568  | 1.138  | 0.326  | 0.108  | 0.219  |
| -1.021 | -0.753 | -0.077 | -0.557 | 0.481  |
| -1.148 | -1.942 | 0.322  | 0.232  | 0.090  |
| 1.543  | -0.133 | 0.244  | 0.266  | -0.022 |
| -1.482 | -0.941 | 0.000  | -0.477 | 0.477  |
| -1.738 | -1.264 | -0.569 | -0.413 | -0.156 |
| -0.404 | -0.381 | 0.249  | -0.229 | 0.477  |
| -1.361 | -0.798 | -0.035 | -0.263 | 0.228  |
| -1.431 | -1.005 | 0.329  | -0.710 | 1.039  |
| -0.105 | -0.084 | -0.184 | -0.054 | -0.130 |
| -0.531 | -0.766 | -0.135 | 0.348  | -0.483 |
| 2.032  | 2.016  | -0.589 | -0.254 | -0.335 |
| 0.470  | 0.330  | -0.201 | -0.915 | 0.714  |
| 2.888  | 1.168  | -0.881 | 0.065  | -0.946 |
| 1.830  | 0.865  | 0.215  | 0.179  | 0.035  |
| 0.174  | 0.288  | 0.488  | -0.652 | 1.141  |
| -0.425 | 0.741  | 0.691  | -0.243 | 0.935  |
| -1.163 | -0.968 | 0.571  | -0.853 | 1.423  |
| 0.524  | 0.965  | 0.632  | -0.160 | 0.792  |
| -0.609 | -0.838 | -0.135 | -0.519 | 0.384  |
| 1.122  | 1.096  | -0.204 | 0.067  | -0.271 |
| 0.886  | 1.247  | -0.963 | -0.234 | -0.730 |

|        |        |        |        |        |
|--------|--------|--------|--------|--------|
| 0.555  | 0.576  | 0.448  | -0.615 | 1.063  |
| -0.539 | -0.586 | 0.006  | -0.896 | 0.902  |
| -0.387 | -1.092 | 0.407  | -0.128 | 0.535  |
| 1.308  | 1.566  | 0.982  | -0.220 | 1.202  |
| -0.918 | -0.211 | -1.221 | -0.889 | -0.332 |
| 2.123  | 1.392  | 0.563  | -0.859 | 1.422  |
| 0.691  | 0.952  | -0.579 | -0.871 | 0.292  |
| 0.325  | 0.359  | 0.069  | 0.023  | 0.046  |
| 2.473  | 2.164  | 0.501  | -0.252 | 0.753  |
| 1.137  | 1.425  | 0.096  | -0.685 | 0.781  |
| -1.378 | -0.750 | 0.033  | -0.854 | 0.887  |
| 1.304  | 1.094  | -0.388 | -0.385 | -0.003 |
| 1.220  | 0.960  | 0.538  | -0.802 | 1.340  |
| 1.784  | 1.998  | -0.254 | -0.950 | 0.696  |
| -0.324 | 0.322  | 0.386  | -1.059 | 1.445  |
| -1.270 | -0.725 | 0.302  | 0.175  | 0.127  |
| -1.670 | -1.131 | 0.086  | -0.684 | 0.770  |
| -0.347 | -0.256 | -0.031 | -0.234 | 0.203  |
| -2.691 | -2.491 | -0.150 | -0.069 | -0.081 |
| 1.833  | 2.223  | 0.097  | -0.143 | 0.240  |
| -2.231 | -1.653 | 0.029  | -0.707 | 0.736  |
| -1.434 | -0.913 | 0.608  | -0.311 | 0.920  |
| 1.355  | 1.716  | -0.794 | 0.094  | -0.888 |
| -1.945 | -1.325 | 0.511  | -0.121 | 0.632  |
| 1.053  | 0.723  | -0.842 | -0.443 | -0.399 |
| -1.341 | -1.156 | -0.167 | -0.765 | 0.597  |
| 1.547  | 1.997  | 1.308  | 0.376  | 0.932  |
| 1.888  | 1.334  | -0.461 | -0.209 | -0.251 |
| 2.561  | 1.627  | -0.114 | -0.054 | -0.060 |
| 0.622  | 0.422  | 0.435  | -0.327 | 0.762  |
| -2.253 | -1.830 | -0.058 | -0.465 | 0.407  |
| 0.808  | 0.419  | -0.305 | -0.249 | -0.056 |
| -0.087 | 0.169  | 0.720  | -0.552 | 1.272  |
| 0.577  | 0.437  | -0.298 | -0.762 | 0.464  |
| 0.067  | -0.313 | 1.125  | 0.437  | 0.688  |
| 0.366  | 0.324  | 0.797  | -0.565 | 1.362  |
| 1.026  | 0.865  | 0.098  | -0.459 | 0.557  |
| 1.096  | 0.506  | 0.091  | -0.489 | 0.580  |
| 1.406  | 1.966  | 0.004  | -0.340 | 0.344  |
| 1.564  | 1.796  | -0.011 | -1.141 | 1.130  |
| -0.049 | 0.075  | 0.527  | -0.587 | 1.114  |
| -0.411 | 0.055  | 0.158  | -0.012 | 0.171  |
| 1.339  | 1.252  | 0.512  | 0.486  | 0.026  |
| 0.483  | 0.208  | -0.010 | 0.506  | -0.515 |
| 1.722  | -0.414 | -0.123 | -0.656 | 0.533  |
| -1.668 | -1.351 | 0.228  | -0.002 | 0.231  |
| -0.028 | -0.084 | 0.279  | -0.079 | 0.359  |
| -1.131 | -0.523 | -1.650 | -1.018 | -0.632 |
| 0.906  | 0.840  | 0.901  | 0.044  | 0.857  |
| -2.518 | -1.631 | -0.422 | -0.651 | 0.229  |
| 0.473  | 0.727  | 0.303  | -0.395 | 0.699  |
| 1.261  | 1.306  | 0.577  | -0.238 | 0.814  |

|        |        |        |        |        |
|--------|--------|--------|--------|--------|
| 1.535  | 1.369  | -0.130 | -0.253 | 0.123  |
| -2.586 | -2.373 | 0.158  | 0.489  | -0.331 |
| -1.260 | -1.473 | -0.414 | -0.763 | 0.349  |
| 1.127  | 0.580  | 0.347  | -0.532 | 0.879  |
| 0.168  | 0.389  | 0.198  | 0.673  | -0.475 |
| -1.347 | -1.703 | -0.187 | -0.074 | -0.113 |
| 1.178  | 1.225  | -0.334 | 0.068  | -0.402 |
| 1.460  | 1.491  | -0.297 | -0.013 | -0.284 |
| -1.667 | -1.509 | 0.258  | -0.687 | 0.945  |
| 1.430  | 1.062  | 0.371  | -0.477 | 0.848  |
| 2.046  | 1.906  | 0.922  | 0.484  | 0.439  |
| -1.164 | -1.589 | 1.244  | -1.235 | 2.479  |
| 1.091  | 1.267  | 0.214  | 0.008  | 0.206  |
| -0.517 | 0.030  | 0.094  | -0.418 | 0.512  |
| -3.327 | -2.814 | -0.549 | -0.739 | 0.190  |
| 1.382  | 0.785  | 0.372  | -0.310 | 0.683  |
| 1.309  | 0.971  | 0.111  | -0.302 | 0.413  |
| 0.053  | 1.143  | -0.482 | 0.725  | -1.208 |
| 1.602  | 2.232  | -0.263 | -1.422 | 1.159  |
| -1.064 | -1.100 | 0.312  | -0.913 | 1.225  |
| 1.000  | 0.970  | 0.283  | -0.251 | 0.535  |
| -0.882 | -0.623 | -0.277 | -0.840 | 0.563  |
| 0.333  | -0.412 | -0.009 | 0.046  | -0.055 |
| -0.988 | -1.226 | 0.200  | -0.575 | 0.775  |
| -3.507 | -1.575 | -0.334 | -0.957 | 0.623  |
| 2.016  | 2.040  | -0.241 | -0.325 | 0.084  |
| 1.822  | 0.812  | 0.376  | 0.196  | 0.181  |
| 1.234  | 1.041  | -0.146 | -0.844 | 0.698  |
| -0.861 | -0.025 | 0.142  | -0.277 | 0.419  |
| 0.906  | 0.234  | 0.420  | -0.004 | 0.424  |
| 1.027  | 0.342  | 0.434  | 0.074  | 0.359  |
| 1.116  | 0.626  | 0.229  | 0.278  | -0.048 |
| 0.483  | -0.288 | -0.374 | 0.249  | -0.623 |
| -0.683 | -0.340 | -0.493 | 0.145  | -0.638 |
| 0.194  | 0.850  | 0.233  | -0.232 | 0.465  |
| -1.806 | -1.530 | -0.912 | -0.065 | -0.847 |
| -2.591 | -1.441 | -0.629 | -0.789 | 0.160  |
| 0.516  | -0.623 | -0.076 | -0.075 | -0.001 |
| 0.623  | 0.887  | 0.280  | 0.007  | 0.273  |
| 1.145  | 0.537  | 0.410  | 0.416  | -0.006 |
| 0.810  | 0.388  | 0.262  | -0.167 | 0.429  |
| 0.797  | 0.025  | -0.807 | -0.546 | -0.261 |
| 0.871  | -0.053 | -0.984 | -0.181 | -0.803 |
| -2.674 | -1.951 | -0.740 | -0.690 | -0.050 |
| 1.716  | 0.810  | 0.194  | 0.855  | -0.662 |
| 0.435  | 0.034  | -0.113 | -0.021 | -0.092 |
| -0.476 | -0.892 | 0.372  | 0.409  | -0.037 |
| -2.169 | -1.575 | -0.167 | -0.478 | 0.311  |
| 1.973  | 2.541  | 0.809  | -0.874 | 1.683  |
| 2.043  | 2.599  | -0.360 | -0.722 | 0.362  |
| 0.524  | 0.076  | 0.433  | 0.385  | 0.048  |
| 1.181  | 0.915  | 0.229  | 0.104  | 0.124  |

|        |        |        |        |        |
|--------|--------|--------|--------|--------|
| 1.914  | 1.091  | 0.330  | -0.280 | 0.610  |
| 2.443  | 1.419  | -0.046 | -0.319 | 0.273  |
| 0.416  | 0.911  | -0.192 | 0.145  | -0.337 |
| 0.100  | 0.715  | 0.198  | -0.018 | 0.215  |
| -0.768 | -1.459 | -0.731 | 0.100  | -0.831 |
| 2.583  | 1.855  | 0.331  | 1.058  | -0.727 |
| 0.370  | 1.060  | -0.120 | -0.872 | 0.752  |
| 0.977  | 1.017  | -0.058 | 0.415  | -0.473 |
| -0.089 | 0.371  | -0.324 | -0.741 | 0.416  |
| 2.102  | 0.975  | 0.227  | 0.536  | -0.309 |
| 0.914  | 0.313  | -0.112 | -0.069 | -0.044 |
| -0.139 | 0.176  | 0.058  | -0.325 | 0.383  |
| 1.311  | 0.171  | 0.106  | 0.456  | -0.350 |
| 1.978  | 1.575  | 0.387  | 0.049  | 0.338  |
| 0.338  | 0.168  | 0.544  | 0.034  | 0.510  |
| 1.556  | 1.686  | 0.609  | -0.056 | 0.665  |
| 0.211  | -0.448 | 0.067  | 0.273  | -0.205 |
| 1.161  | 1.346  | 0.192  | -0.162 | 0.355  |
| -0.088 | -0.029 | 0.568  | -0.862 | 1.431  |
| 0.120  | -0.075 | 0.194  | -0.613 | 0.808  |
| -0.616 | -1.947 | 0.123  | 0.277  | -0.154 |
| 0.330  | 0.450  | 0.260  | 0.057  | 0.203  |
| 0.348  | 0.388  | 0.373  | -0.044 | 0.417  |
| -0.509 | 0.027  | 0.758  | 0.402  | 0.356  |
| -0.754 | -0.594 | -0.195 | -0.107 | -0.089 |
| -0.533 | -0.823 | 0.636  | 0.760  | -0.125 |
| 0.231  | 0.546  | 0.416  | -0.097 | 0.514  |
| 1.528  | -0.002 | -0.355 | 0.442  | -0.798 |
| -0.892 | -0.809 | -0.305 | -0.017 | -0.288 |
| 1.221  | 1.517  | 0.370  | -0.273 | 0.643  |
| 1.585  | 1.921  | -0.299 | -0.489 | 0.190  |
| 2.744  | 1.695  | 0.539  | 0.235  | 0.304  |
| 3.117  | 2.342  | 0.732  | -0.010 | 0.742  |
| 2.201  | 2.432  | 0.026  | -0.152 | 0.178  |
| -1.031 | 0.277  | -0.059 | 0.359  | -0.419 |
| -2.208 | -2.105 | -0.080 | -0.091 | 0.010  |
| 2.452  | 2.760  | -0.067 | -0.150 | 0.083  |
| -1.355 | -0.545 | 0.227  | 0.002  | 0.225  |
| -0.854 | -0.681 | 0.776  | -0.592 | 1.368  |
| -1.481 | -0.686 | 0.500  | -0.072 | 0.571  |
| 0.088  | 0.283  | 0.122  | -0.151 | 0.272  |
| -1.454 | -1.391 | 0.302  | -0.250 | 0.552  |
| 2.159  | 2.591  | 0.523  | -0.488 | 1.011  |
| 1.414  | 0.467  | 0.293  | -0.219 | 0.512  |
| -1.800 | -1.695 | -0.266 | -0.363 | 0.097  |
| -2.191 | -2.045 | 0.092  | 0.093  | -0.001 |
| -0.881 | -0.733 | -0.156 | -0.477 | 0.322  |
| -3.164 | -2.723 | 0.161  | -0.306 | 0.467  |
| -2.961 | -2.307 | 0.059  | 0.160  | -0.101 |
| -3.005 | -2.537 | -0.066 | -0.350 | 0.284  |
| -3.649 | -3.263 | 0.264  | -0.568 | 0.832  |

|        |        |        |        |        |
|--------|--------|--------|--------|--------|
| -1.284 | -1.620 | 0.018  | -0.671 | 0.689  |
| -3.158 | -2.514 | -0.363 | -0.593 | 0.230  |
| -2.728 | -2.065 | 0.247  | -1.385 | 1.632  |
| -1.780 | -0.803 | 0.401  | -0.206 | 0.607  |
| -0.952 | -0.503 | 0.600  | 0.166  | 0.435  |
| -0.203 | -0.757 | 0.209  | -0.233 | 0.442  |
| 0.468  | 0.313  | -0.307 | 0.832  | -1.139 |
| -1.236 | -0.169 | 0.082  | -0.137 | 0.219  |
| -1.375 | -0.272 | -0.187 | -0.690 | 0.504  |
| 0.225  | 0.937  | 0.209  | -0.210 | 0.419  |
| 2.281  | 0.470  | 0.322  | 0.705  | -0.383 |
| -2.823 | -1.832 | -0.020 | 0.097  | -0.117 |
| -2.730 | -0.860 | 0.874  | 0.201  | 0.673  |
| -1.511 | -1.412 | 0.026  | 0.146  | -0.120 |
| -2.814 | -1.882 | 0.344  | 0.140  | 0.204  |
| 1.148  | 0.900  | 0.262  | 0.369  | -0.107 |
| -3.235 | -2.602 | -0.375 | -0.935 | 0.560  |
| -0.352 | 0.011  | -0.357 | -0.804 | 0.447  |
| -3.680 | -3.034 | 0.051  | -0.183 | 0.234  |
| 1.485  | 1.105  | 0.014  | 0.113  | -0.099 |
| 0.564  | 0.767  | -0.932 | -0.544 | -0.388 |
| -2.240 | -1.687 | -0.580 | -1.012 | 0.432  |
| 0.257  | -0.257 | -0.061 | -0.382 | 0.321  |
| -0.354 | -2.626 | -0.261 | 0.516  | -0.777 |
| -2.563 | -2.515 | 0.018  | 0.667  | -0.649 |
| -0.656 | -1.198 | -0.125 | -0.104 | -0.021 |
| -1.374 | -1.618 | 0.043  | -0.553 | 0.596  |
| -0.027 | -0.316 | 1.029  | 0.817  | 0.213  |
| -1.698 | -1.482 | 0.185  | -0.684 | 0.869  |
| -2.260 | -2.620 | -0.220 | 0.166  | -0.386 |
| -1.764 | -2.257 | -0.050 | -0.182 | 0.132  |
| 0.972  | 1.705  | -0.233 | -0.427 | 0.193  |
| -0.389 | -0.499 | 0.452  | -0.341 | 0.794  |
| -0.124 | -1.270 | 0.548  | 0.043  | 0.505  |
| -0.785 | -1.409 | 0.657  | -0.355 | 1.012  |
| -1.848 | -2.530 | 1.469  | 0.069  | 1.400  |
| 0.669  | 0.885  | 0.461  | -0.048 | 0.509  |
| 0.309  | 0.829  | -0.602 | -0.521 | -0.081 |
| -0.481 | -0.738 | -0.077 | 0.657  | -0.734 |
| 0.547  | 0.566  | 0.624  | 1.057  | -0.432 |
| -1.506 | -0.822 | -0.164 | -1.001 | 0.837  |
| -1.289 | -0.536 | 0.331  | -0.142 | 0.473  |
| -0.948 | -1.813 | 0.591  | 0.045  | 0.546  |
| 2.434  | 2.526  | 0.761  | -0.132 | 0.893  |
| -1.685 | -1.233 | 0.345  | -0.403 | 0.748  |
| 0.042  | 0.459  | 0.295  | 0.151  | 0.144  |
| 1.880  | 2.094  | 0.174  | -0.650 | 0.824  |
| -0.910 | -0.476 | -0.094 | -0.538 | 0.444  |
| -1.391 | -0.867 | -0.438 | 0.181  | -0.618 |
| -0.175 | 0.385  | -0.608 | -0.749 | 0.141  |
| 0.184  | 0.457  | -0.149 | 0.526  | -0.675 |

|        |        |        |        |        |
|--------|--------|--------|--------|--------|
| -0.405 | -0.125 | -2.077 | -0.786 | -1.291 |
| -1.341 | -0.843 | -0.448 | -0.288 | -0.160 |
| 1.044  | 2.208  | 0.373  | -0.025 | 0.398  |
| 0.888  | 0.799  | 0.093  | 0.246  | -0.153 |
| 1.706  | 1.284  | 0.317  | 0.375  | -0.058 |
| -2.751 | -2.180 | 0.095  | 0.295  | -0.200 |
| -3.261 | -2.996 | 0.208  | 0.149  | 0.059  |
| -0.575 | -1.561 | -0.145 | 0.522  | -0.668 |
| -1.669 | -2.283 | -0.020 | 0.026  | -0.046 |
| -4.564 | -4.233 | 0.090  | -0.024 | 0.113  |
| -1.375 | -1.039 | 0.074  | -1.124 | 1.198  |
| 1.362  | -0.098 | 0.559  | 0.528  | 0.031  |
| 0.419  | -0.107 | -0.650 | 0.019  | -0.669 |
| 1.832  | 1.839  | -0.796 | -0.331 | -0.465 |
| 1.466  | 1.399  | -0.910 | -0.256 | -0.654 |
| 0.877  | 1.586  | -0.221 | -0.255 | 0.033  |
| 1.485  | 0.593  | -0.402 | 0.246  | -0.648 |
| 2.082  | 0.785  | 0.321  | 0.569  | -0.248 |
| 0.407  | 0.965  | 0.016  | -0.451 | 0.467  |
| 2.221  | 0.318  | 0.182  | 0.849  | -0.667 |
| -0.462 | -0.151 | -0.814 | -0.074 | -0.741 |
| -0.964 | -0.400 | -0.184 | -0.312 | 0.128  |
| 0.241  | 0.688  | -0.482 | 0.017  | -0.499 |
| -1.174 | -0.961 | -0.193 | -0.004 | -0.189 |
| 1.947  | 1.387  | 0.082  | 0.021  | 0.061  |
| -2.018 | -1.513 | -0.448 | 0.331  | -0.779 |
| 2.099  | 1.239  | 0.546  | 0.194  | 0.352  |
| 1.745  | 2.239  | -0.461 | -0.110 | -0.350 |
| -1.685 | -1.244 | -0.337 | -0.613 | 0.276  |
| 1.894  | 1.744  | 0.115  | 1.055  | -0.941 |
| -1.155 | -0.570 | -0.637 | -0.212 | -0.425 |
| 0.532  | 0.805  | -0.677 | -0.139 | -0.538 |
| -1.443 | -0.545 | 0.029  | 0.137  | -0.108 |
| 1.188  | 1.657  | 0.048  | -0.492 | 0.541  |
| -0.824 | -0.830 | -0.560 | -0.217 | -0.343 |
| -2.488 | -1.864 | 0.253  | -0.286 | 0.539  |
| 0.145  | 1.582  | -0.208 | -0.873 | 0.664  |
| 2.859  | 2.080  | 0.996  | 0.080  | 0.916  |
| -1.287 | -0.449 | -0.208 | -0.553 | 0.346  |
| 0.145  | -0.501 | 0.188  | 0.293  | -0.105 |
| -0.662 | -0.182 | -0.485 | -0.641 | 0.156  |
| 1.878  | 0.450  | 0.415  | 0.219  | 0.196  |
| 0.346  | 0.801  | -0.303 | -0.805 | 0.502  |
| 0.533  | 1.135  | -0.683 | -0.850 | 0.167  |
| -0.800 | -0.520 | 0.866  | -0.044 | 0.911  |
| 0.126  | 0.064  | 0.473  | 0.165  | 0.308  |
| -0.071 | 0.275  | -0.292 | -0.563 | 0.271  |
| 1.313  | 0.009  | -0.196 | -0.106 | -0.090 |
| 0.915  | 1.379  | -1.045 | -0.673 | -0.371 |
| 2.309  | 1.781  | 0.316  | 0.283  | 0.033  |
| 1.097  | 0.451  | 0.285  | -0.056 | 0.341  |

|        |        |        |        |        |
|--------|--------|--------|--------|--------|
| -0.650 | -0.191 | 0.014  | 0.137  | -0.122 |
| 1.327  | 0.525  | -0.035 | -0.068 | 0.033  |
| 1.542  | 1.243  | 0.297  | -0.006 | 0.303  |
| 0.783  | 1.413  | -0.732 | -0.002 | -0.730 |
| -0.863 | -0.027 | -0.830 | 0.007  | -0.837 |
| -1.792 | -1.376 | 0.478  | -0.378 | 0.856  |
| 0.578  | -0.484 | 0.717  | 0.578  | 0.139  |
| -0.658 | -0.025 | -0.343 | 0.327  | -0.670 |
| -0.642 | -1.858 | 0.114  | 0.329  | -0.215 |
| 1.738  | 2.092  | 0.950  | 0.102  | 0.848  |
| -1.230 | -1.313 | -0.350 | -0.173 | -0.177 |
| -2.002 | -0.365 | -0.115 | -0.206 | 0.091  |
| -1.136 | -1.270 | -0.003 | 0.396  | -0.399 |
| 0.768  | 0.114  | 0.044  | -0.048 | 0.092  |
| 0.908  | 1.367  | -0.029 | -0.585 | 0.555  |
| -0.031 | 0.413  | 0.717  | -0.380 | 1.098  |
| 1.127  | 0.714  | 0.209  | -0.085 | 0.294  |
| 0.149  | -0.002 | -0.683 | -0.457 | -0.226 |
| -1.869 | -1.238 | 0.151  | -0.681 | 0.832  |
| 2.073  | 2.076  | -0.356 | -0.423 | 0.068  |
| 2.842  | 1.354  | 0.028  | 0.964  | -0.936 |
| 1.514  | 2.439  | -0.030 | -0.258 | 0.228  |
| -0.263 | -1.087 | 0.005  | -0.623 | 0.628  |
| -1.076 | -0.581 | -0.478 | 0.281  | -0.759 |
| -0.872 | -0.244 | 0.851  | -0.205 | 1.056  |
| -0.218 | -0.661 | -0.031 | -0.187 | 0.155  |
| -1.471 | -1.414 | -0.528 | -0.223 | -0.304 |
| 0.220  | 0.672  | -0.475 | -0.852 | 0.377  |
| -0.469 | -0.193 | -0.058 | -0.302 | 0.245  |
| -0.534 | -0.739 | -0.455 | -0.488 | 0.033  |
| 0.435  | 0.691  | 0.434  | 0.040  | 0.394  |
| 0.240  | -0.160 | 0.477  | 0.516  | -0.039 |
| -0.857 | -1.233 | 0.056  | 0.157  | -0.101 |
| -2.617 | -1.865 | 0.731  | -0.337 | 1.069  |
| 0.993  | 0.674  | -0.258 | -0.008 | -0.250 |
| -0.722 | -0.813 | 0.033  | -0.294 | 0.327  |
| 0.249  | 0.287  | 0.644  | -0.722 | 1.367  |
| 0.268  | -0.033 | -0.531 | -1.205 | 0.674  |
| -0.392 | -0.267 | 0.262  | -0.116 | 0.379  |
| 1.232  | 0.283  | -0.241 | -0.042 | -0.199 |
| 1.018  | -0.251 | 0.610  | 0.294  | 0.315  |
| 1.808  | 1.367  | -0.269 | 0.303  | -0.573 |
| 1.608  | 1.884  | 0.180  | -0.421 | 0.601  |
| 0.052  | -0.035 | 0.003  | 0.325  | -0.323 |
| -1.087 | -1.182 | -1.064 | -0.197 | -0.867 |
| 0.597  | 0.010  | 0.064  | -0.021 | 0.084  |
| 0.129  | 0.325  | -0.173 | -0.639 | 0.466  |
| -0.385 | -0.527 | -0.065 | -0.276 | 0.211  |
| -1.078 | 0.230  | 0.296  | -0.680 | 0.976  |
| -1.477 | -0.972 | 0.017  | 0.278  | -0.261 |
| 3.190  | 2.699  | 0.208  | -0.162 | 0.370  |

|        |        |        |        |        |
|--------|--------|--------|--------|--------|
| 1.468  | 1.852  | -0.245 | -0.454 | 0.209  |
| 0.419  | 0.713  | -0.319 | -0.164 | -0.155 |
| 0.172  | 0.632  | 0.596  | -0.465 | 1.061  |
| 1.197  | 0.205  | 0.400  | -0.007 | 0.407  |
| 3.364  | 2.923  | -0.353 | 0.144  | -0.497 |
| -1.610 | -2.153 | 0.152  | 0.151  | 0.001  |
| -1.688 | -0.796 | 0.261  | -0.424 | 0.685  |
| 2.325  | 2.106  | 0.135  | -0.220 | 0.355  |
| -0.778 | -1.642 | 0.543  | 1.190  | -0.647 |
| -0.041 | -0.114 | -0.034 | -0.120 | 0.086  |
| -0.090 | 0.203  | 0.248  | 0.217  | 0.031  |
| -0.045 | 0.015  | -0.026 | -0.130 | 0.104  |
| -1.886 | -1.285 | 0.049  | -0.642 | 0.691  |
| 0.597  | -0.101 | 0.453  | -0.022 | 0.475  |
| 3.278  | 2.363  | 0.395  | 0.290  | 0.105  |
| 1.024  | 1.116  | 0.057  | -0.358 | 0.415  |
| -3.072 | -2.707 | 0.224  | -0.278 | 0.503  |
| 0.538  | 0.991  | 0.260  | -0.205 | 0.465  |
| 1.130  | 0.629  | 0.268  | -0.094 | 0.362  |
| 2.276  | 1.697  | 0.223  | 0.468  | -0.245 |
| -2.892 | -0.756 | -0.150 | -0.641 | 0.491  |
| -2.106 | -2.654 | 0.034  | -0.120 | 0.154  |
| 1.716  | 0.777  | -0.621 | -0.142 | -0.479 |
| 1.098  | -0.227 | -2.270 | -0.566 | -1.703 |
| 2.257  | 0.923  | -0.719 | -0.117 | -0.602 |
| 0.666  | -0.638 | -1.064 | -0.149 | -0.916 |
| 2.739  | 1.738  | 0.497  | -0.482 | 0.978  |
| 0.969  | -0.122 | 0.400  | 0.393  | 0.007  |
| -1.276 | -0.532 | 0.075  | -0.468 | 0.543  |
| 2.368  | 1.513  | 0.486  | 0.188  | 0.299  |
| 0.597  | -0.480 | -0.232 | 0.099  | -0.331 |
| 1.427  | 1.235  | 0.303  | 0.131  | 0.173  |
| 0.849  | -0.436 | 0.038  | 0.044  | -0.006 |
| 1.289  | 1.685  | 0.277  | 0.170  | 0.107  |
| 0.861  | 1.240  | -0.228 | 0.544  | -0.772 |
| 0.619  | 1.136  | 0.690  | -0.229 | 0.920  |
| -1.186 | -1.276 | -0.326 | 0.449  | -0.775 |
| -1.317 | -1.301 | 0.178  | 0.077  | 0.101  |
| -0.048 | 0.367  | 0.060  | -0.243 | 0.303  |
| -0.122 | 0.230  | -0.590 | -0.271 | -0.319 |
| 1.349  | 0.632  | -0.456 | 0.308  | -0.765 |
| 1.291  | 1.379  | 0.265  | -0.372 | 0.637  |
| 1.760  | 1.478  | 0.313  | 0.198  | 0.115  |
| 1.011  | 0.306  | 0.205  | 0.241  | -0.036 |
| -0.196 | 0.057  | -0.018 | 0.255  | -0.273 |
| 0.280  | 0.311  | -0.421 | -0.010 | -0.411 |
| 1.172  | 1.121  | 0.264  | 0.472  | -0.208 |
| -0.369 | -0.392 | 0.239  | 0.231  | 0.008  |
| -1.390 | -0.819 | -0.242 | -0.147 | -0.095 |
| 0.838  | 0.343  | -0.071 | 0.307  | -0.379 |
| -1.137 | -0.877 | -0.295 | -0.177 | -0.118 |



|        |        |        |        |        |
|--------|--------|--------|--------|--------|
| 0.101  | -0.379 | 0.064  | -0.108 | 0.172  |
| 0.699  | 0.001  | -0.043 | 0.223  | -0.267 |
| -2.345 | -1.854 | 0.165  | -0.246 | 0.410  |
| 1.040  | 0.284  | 0.237  | 0.234  | 0.002  |
| 1.824  | 1.134  | 0.332  | 0.761  | -0.429 |
| -1.726 | -1.402 | 0.225  | -0.319 | 0.544  |
| -2.282 | -1.989 | -0.021 | 0.160  | -0.181 |
| -1.196 | -1.454 | -0.305 | 0.037  | -0.342 |
| -0.443 | 0.422  | 0.155  | 0.330  | -0.175 |
| 0.070  | -0.598 | 0.254  | -0.225 | 0.479  |
| -1.319 | -1.574 | -0.045 | 0.213  | -0.258 |
| -1.434 | -1.156 | -0.250 | -0.568 | 0.319  |
| -0.141 | -0.515 | 1.183  | 0.355  | 0.829  |
| 1.868  | 1.040  | 0.036  | 0.063  | -0.027 |
| 0.965  | 0.279  | -0.255 | -0.640 | 0.385  |
| 0.717  | 0.564  | 0.003  | 0.428  | -0.425 |
| -0.820 | -1.448 | 0.271  | -0.907 | 1.178  |
| -0.668 | -1.009 | -0.250 | -0.191 | -0.058 |
| -1.267 | -1.902 | 0.054  | 0.412  | -0.357 |
| -1.624 | -0.990 | 0.442  | -0.404 | 0.846  |
| -1.848 | -1.790 | 0.129  | 0.230  | -0.101 |
| 1.796  | 0.979  | -0.288 | 0.180  | -0.467 |
| 0.582  | 1.690  | -0.237 | 0.044  | -0.281 |
| -0.339 | 0.033  | 0.115  | -0.744 | 0.860  |
| 1.271  | 0.831  | 0.293  | 0.606  | -0.312 |
| -0.143 | -0.448 | 0.204  | -0.334 | 0.538  |
| 1.353  | 1.803  | 0.474  | -0.600 | 1.074  |
| -0.651 | -0.209 | 0.174  | 0.349  | -0.175 |
| 3.090  | 1.326  | 0.022  | 0.510  | -0.488 |
| 2.396  | 1.709  | 0.170  | 0.248  | -0.078 |
| 0.462  | -0.055 | -0.325 | 0.158  | -0.483 |
| -1.914 | -0.786 | -0.103 | -0.207 | 0.104  |
| -0.852 | -0.256 | 1.045  | -0.185 | 1.229  |
| -0.014 | -0.549 | 0.344  | 0.067  | 0.277  |
| 1.309  | 1.270  | 0.668  | 0.235  | 0.434  |
| -0.960 | -0.676 | 0.791  | -0.191 | 0.981  |
| 1.285  | 0.744  | 0.217  | -0.167 | 0.384  |
| -1.235 | -1.781 | 0.317  | -0.129 | 0.445  |
| -0.542 | -0.063 | -0.252 | -0.077 | -0.175 |
| 1.148  | 0.416  | 0.230  | 0.058  | 0.172  |
| -1.288 | -0.544 | -0.082 | -0.248 | 0.166  |
| -1.021 | -0.069 | 0.741  | -0.201 | 0.942  |
| 2.521  | 2.352  | 0.189  | -0.476 | 0.665  |
| -1.024 | -0.707 | -0.255 | 0.502  | -0.757 |
| -1.111 | -1.302 | 0.130  | 0.109  | 0.021  |
| -0.519 | -0.285 | 0.254  | 0.040  | 0.214  |
| -0.843 | -2.102 | 0.112  | -0.778 | 0.890  |
| -1.213 | -0.787 | 0.021  | 0.541  | -0.520 |
| -2.991 | -2.891 | 0.088  | -0.586 | 0.674  |
| -0.319 | -0.504 | 0.350  | 0.104  | 0.247  |
| 2.135  | 1.599  | 0.875  | 0.059  | 0.816  |

|        |        |        |        |        |
|--------|--------|--------|--------|--------|
| -0.996 | -0.676 | -0.030 | -0.526 | 0.495  |
| 0.615  | 1.341  | 0.014  | -0.535 | 0.549  |
| 0.493  | -0.292 | -0.734 | 0.018  | -0.753 |
| 0.438  | 1.021  | 0.615  | -0.076 | 0.691  |
| -2.277 | -0.986 | -1.005 | -0.402 | -0.603 |
| -0.730 | -0.514 | 0.024  | 0.190  | -0.166 |
| 2.346  | 1.315  | 0.126  | 0.048  | 0.078  |
| 0.476  | 0.136  | -0.196 | -0.254 | 0.058  |
| 1.128  | 1.374  | -0.120 | -0.252 | 0.132  |
| -1.024 | -1.494 | 0.162  | 0.100  | 0.062  |
| 0.157  | -0.192 | 0.238  | 0.600  | -0.362 |
| -0.774 | 0.039  | -0.598 | -0.544 | -0.054 |
| 1.048  | 1.599  | -0.294 | -0.059 | -0.235 |
| 1.553  | 1.834  | 0.262  | -0.514 | 0.776  |
| 1.166  | 1.652  | -0.057 | 0.424  | -0.481 |
| 2.482  | 1.206  | -0.192 | 0.624  | -0.816 |
| 0.757  | -0.027 | 0.258  | 0.129  | 0.128  |
| 2.079  | 1.780  | 0.456  | 0.002  | 0.454  |
| -0.353 | -0.815 | 0.233  | 0.348  | -0.114 |
| -1.637 | -0.920 | 0.730  | -1.063 | 1.794  |
| 1.307  | 1.877  | -0.599 | -0.860 | 0.262  |
| 0.890  | 0.908  | 0.443  | -0.171 | 0.613  |
| -0.297 | -0.570 | 0.397  | -0.359 | 0.756  |
| 1.097  | 1.210  | 0.004  | 0.047  | -0.042 |
| 0.917  | 0.629  | 0.934  | 0.364  | 0.570  |
| 0.603  | 0.651  | 0.447  | 0.209  | 0.237  |
| -1.613 | -1.495 | -0.333 | -0.001 | -0.332 |
| 0.779  | 0.469  | 0.311  | 0.035  | 0.277  |
| 0.692  | 0.496  | 0.170  | -0.194 | 0.364  |
| 0.018  | 0.313  | -0.256 | -0.820 | 0.564  |
| -0.369 | -0.881 | 0.012  | -0.194 | 0.206  |
| -0.671 | -0.463 | -0.405 | -0.628 | 0.223  |
| 0.317  | 0.230  | 0.596  | -0.417 | 1.012  |
| -0.009 | -0.191 | 0.006  | -0.035 | 0.041  |
| 0.256  | -0.105 | -0.275 | 0.041  | -0.316 |
| -0.130 | -0.260 | -0.194 | -0.074 | -0.121 |
| 1.731  | 1.074  | -0.166 | -0.244 | 0.079  |
| -3.357 | -3.161 | -0.097 | -0.163 | 0.066  |
| -0.834 | -0.870 | 0.219  | 0.203  | 0.016  |
| 0.654  | 0.353  | -0.098 | -0.128 | 0.030  |
| 0.666  | 0.266  | 0.149  | 0.053  | 0.096  |
| 0.542  | 0.264  | -1.448 | -1.014 | -0.434 |
| 2.686  | 2.216  | -0.068 | -0.166 | 0.098  |
| 1.514  | 1.555  | 0.210  | -0.857 | 1.067  |
| 0.581  | 0.914  | 0.213  | 0.356  | -0.143 |
| -2.624 | -1.738 | -0.772 | -0.607 | -0.165 |
| 3.483  | 2.032  | -0.312 | 0.192  | -0.504 |
| -2.624 | -2.495 | -0.211 | 0.201  | -0.412 |
| -2.087 | -1.478 | 0.184  | 0.001  | 0.183  |
| 3.920  | 2.534  | -0.151 | -0.225 | 0.074  |
| 0.720  | -0.522 | -1.157 | -0.168 | -0.989 |

|        |        |        |        |        |
|--------|--------|--------|--------|--------|
| 0.353  | 0.493  | -0.115 | 0.172  | -0.288 |
| -0.952 | -1.417 | -0.053 | 0.224  | -0.277 |
| -2.347 | -1.747 | -0.125 | -0.230 | 0.106  |
| 0.743  | 0.012  | 0.368  | -0.209 | 0.577  |
| -2.600 | -1.848 | -0.644 | -0.732 | 0.088  |
| -0.574 | -0.224 | 0.034  | -0.238 | 0.271  |
| -0.912 | -0.652 | -0.276 | -1.049 | 0.773  |
| 2.384  | 2.542  | 0.621  | -0.138 | 0.759  |
| 1.776  | 1.658  | 0.358  | 0.093  | 0.265  |
| 1.150  | 0.295  | 0.534  | -0.078 | 0.612  |
| 1.385  | 1.313  | 0.316  | 0.012  | 0.304  |
| 2.854  | 1.640  | 0.281  | 0.638  | -0.357 |
| 1.728  | 1.941  | -0.042 | -0.227 | 0.185  |
| 3.260  | 2.575  | 0.256  | -0.252 | 0.508  |
| -1.455 | -0.582 | 0.291  | -0.756 | 1.047  |
| 1.479  | 1.169  | 0.157  | 0.656  | -0.500 |
| -1.235 | -0.515 | 0.261  | -0.435 | 0.696  |
| 1.389  | 1.499  | 0.676  | 0.088  | 0.587  |
| 1.886  | 1.977  | 0.587  | 0.283  | 0.304  |
| -2.433 | -1.259 | -0.001 | 0.107  | -0.107 |
| 0.912  | 0.453  | 0.287  | 0.356  | -0.069 |
| -1.634 | -0.901 | 0.418  | -0.711 | 1.129  |
| -0.178 | 0.977  | 0.382  | -0.445 | 0.826  |
| -2.881 | -2.945 | -0.558 | -0.985 | 0.427  |
| -2.621 | -2.186 | -0.266 | -0.577 | 0.311  |
| -3.640 | -3.183 | -0.135 | -0.325 | 0.190  |
| -0.449 | -0.271 | -0.215 | 0.282  | -0.497 |
| 1.682  | 0.199  | 0.124  | 0.452  | -0.328 |
| -1.350 | -0.327 | 0.683  | -0.115 | 0.797  |
| -0.680 | -0.398 | -0.043 | -0.025 | -0.018 |
| -1.347 | -0.954 | 0.131  | -0.315 | 0.447  |
| 0.937  | 0.953  | 0.092  | 0.336  | -0.244 |
| -0.177 | 0.121  | -0.329 | -0.399 | 0.069  |
| -0.635 | -0.315 | 0.236  | -0.739 | 0.975  |
| 0.011  | 0.161  | 0.105  | -0.001 | 0.106  |
| 2.470  | 1.867  | 0.519  | 0.245  | 0.274  |
| 1.372  | 2.023  | 0.646  | -0.782 | 1.428  |
| -0.920 | -0.344 | -0.764 | -1.129 | 0.365  |
| -2.385 | -2.057 | 0.172  | -0.311 | 0.483  |
| -0.956 | -1.832 | 0.324  | -0.314 | 0.638  |
| -0.506 | 0.759  | 0.172  | -0.803 | 0.975  |
| 2.917  | 1.316  | 0.665  | 0.496  | 0.169  |
| -0.721 | -0.578 | -0.149 | -0.474 | 0.325  |
| -2.267 | -1.941 | 0.361  | -0.496 | 0.857  |
| 1.120  | 0.807  | 0.051  | 0.031  | 0.019  |
| -1.682 | -0.679 | -0.988 | -0.778 | -0.210 |
| -2.798 | -2.034 | 0.093  | 0.446  | -0.353 |
| 2.722  | 2.127  | 1.049  | 0.330  | 0.720  |
| 2.455  | 1.820  | -0.146 | -0.001 | -0.145 |
| -0.177 | -0.517 | 0.651  | 0.796  | -0.145 |
| -0.446 | -0.988 | 0.434  | 0.122  | 0.312  |

|        |        |        |        |        |
|--------|--------|--------|--------|--------|
| -0.339 | -1.090 | -0.857 | -0.846 | -0.011 |
| -0.576 | -0.715 | 0.239  | 0.108  | 0.131  |
| -1.408 | -1.364 | 0.296  | -0.123 | 0.420  |
| -0.987 | -1.071 | 0.224  | 0.700  | -0.477 |
| -2.627 | -2.363 | 0.351  | -0.154 | 0.504  |
| 1.015  | 0.139  | -1.418 | -0.630 | -0.788 |
| -0.351 | 0.422  | 0.687  | 1.413  | -0.726 |
| -2.274 | -2.629 | -0.134 | 0.603  | -0.737 |
| 0.129  | -0.013 | 0.063  | -0.329 | 0.392  |
| 0.477  | 0.842  | -0.840 | -0.335 | -0.504 |
| 1.450  | 1.103  | -0.230 | 0.278  | -0.508 |
| 1.154  | -0.059 | 0.239  | 0.137  | 0.102  |
| -0.449 | -0.188 | -0.237 | 0.175  | -0.412 |
| -1.545 | -1.326 | -0.521 | -0.879 | 0.358  |
| -0.902 | -0.855 | 0.400  | 0.745  | -0.345 |
| -0.546 | -0.697 | 0.088  | 0.037  | 0.051  |
| 1.093  | 0.572  | 0.125  | -0.233 | 0.358  |
| -1.123 | -0.896 | 0.223  | -0.386 | 0.609  |
| 3.224  | 1.813  | 0.247  | 0.107  | 0.140  |
| -0.501 | -0.334 | -1.182 | -0.559 | -0.623 |
| -0.937 | -1.818 | 0.443  | -0.507 | 0.950  |
| -2.606 | -2.996 | 0.144  | 0.176  | -0.032 |
| -2.561 | -2.044 | -0.154 | -0.303 | 0.149  |
| -0.219 | -0.757 | 0.010  | -0.231 | 0.241  |
| 1.523  | 0.816  | 0.332  | 0.293  | 0.039  |
| -0.576 | -0.304 | 0.183  | 0.177  | 0.006  |
| 0.589  | 0.598  | 0.349  | 0.731  | -0.382 |
| 0.266  | 1.353  | 0.078  | -0.025 | 0.103  |
| 0.806  | 0.780  | 0.405  | 0.426  | -0.021 |
| 0.416  | 1.056  | 0.204  | -0.158 | 0.361  |
| -0.188 | 0.855  | 0.035  | 0.304  | -0.269 |
| 0.543  | 1.254  | -0.398 | -0.725 | 0.327  |
| 0.305  | -0.186 | 0.223  | -0.009 | 0.232  |
| -0.144 | -0.562 | 0.142  | 0.209  | -0.067 |
| 0.302  | -0.465 | 0.056  | 0.066  | -0.011 |
| 0.625  | 0.660  | 0.287  | 0.545  | -0.258 |
| -0.749 | -0.520 | -0.009 | -0.088 | 0.078  |
| -1.419 | -0.652 | 0.214  | -0.541 | 0.755  |
| 0.621  | 0.399  | 0.386  | -0.042 | 0.428  |
| 0.624  | 2.108  | 0.006  | -0.329 | 0.335  |
| 2.002  | 2.119  | 0.304  | -0.230 | 0.533  |
| -1.033 | -0.756 | 0.556  | 0.144  | 0.413  |
| -0.364 | -0.504 | 0.256  | 0.240  | 0.016  |
| -1.856 | -1.876 | 0.009  | 0.202  | -0.193 |
| -0.074 | -0.931 | -0.079 | -0.653 | 0.574  |
| -0.984 | -2.307 | -0.267 | 0.070  | -0.337 |
| -0.334 | 0.117  | 0.057  | -0.459 | 0.517  |
| 0.678  | 1.476  | -0.993 | -1.110 | 0.117  |
| -0.414 | -0.266 | -0.180 | -0.489 | 0.310  |
| -1.031 | -1.127 | -0.046 | -0.737 | 0.691  |
| 2.110  | 0.739  | -0.104 | -0.166 | 0.061  |

|        |        |        |        |        |
|--------|--------|--------|--------|--------|
| 2.040  | 2.271  | -0.508 | -0.631 | 0.123  |
| -2.532 | -2.660 | 0.391  | -0.024 | 0.416  |
| -2.585 | -2.363 | 0.334  | -0.376 | 0.709  |
| -3.490 | -3.378 | 0.129  | -0.707 | 0.836  |
| -0.330 | 0.532  | -0.173 | -0.478 | 0.305  |
| 0.565  | 0.565  | -0.098 | -0.277 | 0.179  |
| -0.481 | -1.648 | 0.137  | -0.372 | 0.509  |
| -0.348 | -1.553 | -0.346 | -0.035 | -0.310 |
| 0.924  | 1.686  | 0.101  | -0.059 | 0.160  |
| 0.932  | 1.407  | 0.929  | 0.298  | 0.631  |
| 1.891  | 1.134  | -0.109 | -0.094 | -0.015 |
| 0.972  | 1.375  | 0.368  | -0.185 | 0.553  |
| 1.004  | 0.501  | -0.263 | -0.210 | -0.054 |
| -3.292 | -3.080 | 0.090  | -0.173 | 0.263  |
| 3.039  | 2.770  | 0.180  | -0.182 | 0.362  |
| 0.786  | 0.991  | -0.426 | -0.066 | -0.361 |
| 1.120  | 1.504  | 0.242  | -0.168 | 0.410  |
| 1.999  | 0.921  | 0.301  | 0.528  | -0.227 |
| 0.616  | 1.437  | -0.279 | -0.026 | -0.253 |
| 0.746  | -0.548 | 0.428  | 0.451  | -0.023 |
| 0.049  | 0.043  | 0.450  | 0.350  | 0.100  |
| -2.368 | -2.392 | -0.308 | 1.375  | -1.684 |
| -2.068 | -2.174 | -0.037 | 0.330  | -0.367 |
| -0.087 | 0.212  | 1.030  | -0.032 | 1.062  |
| -2.488 | -2.058 | 1.348  | 0.168  | 1.180  |
| -0.334 | -1.314 | -0.232 | -0.429 | 0.197  |
| 0.337  | -1.368 | -0.023 | -0.109 | 0.085  |
| -1.764 | -0.857 | -0.227 | -0.889 | 0.662  |
| -0.867 | -0.611 | -0.744 | -0.345 | -0.399 |
| -1.888 | -1.455 | -0.399 | -0.305 | -0.094 |
| 0.797  | 0.109  | 0.594  | 0.942  | -0.348 |
| -1.976 | -1.635 | -0.190 | -1.325 | 1.135  |
| -3.313 | -2.410 | 0.268  | 0.703  | -0.435 |
| -3.351 | -3.009 | -0.056 | 0.012  | -0.068 |
| -1.621 | -0.931 | 0.101  | 0.697  | -0.595 |
| 1.322  | -0.090 | -0.123 | -0.122 | 0.000  |
| -0.536 | -0.384 | -0.520 | -0.462 | -0.058 |
| -0.223 | -0.258 | 0.240  | -0.843 | 1.083  |
| -1.011 | -1.235 | -0.431 | -0.573 | 0.142  |
| -1.419 | -1.203 | 0.561  | 0.222  | 0.339  |
| -0.436 | -0.523 | 0.492  | -0.348 | 0.840  |
| 0.483  | -0.492 | 0.730  | 0.572  | 0.158  |
| -0.187 | -1.442 | 0.181  | 0.268  | -0.087 |
| 0.047  | -1.235 | 0.135  | 0.191  | -0.056 |
| 0.386  | 0.163  | 0.486  | -0.339 | 0.825  |
| 0.079  | 0.166  | 0.067  | 0.376  | -0.309 |
| -0.008 | 0.575  | -0.177 | -0.784 | 0.606  |
| -2.491 | -1.819 | -0.413 | -0.808 | 0.395  |
| -0.232 | 0.099  | 0.012  | -0.726 | 0.738  |
| -0.369 | -0.374 | 0.010  | -0.041 | 0.051  |
| 0.960  | 1.249  | -0.157 | -0.006 | -0.151 |

|        |        |        |        |        |
|--------|--------|--------|--------|--------|
| -1.163 | -0.698 | -0.277 | 0.321  | -0.598 |
| -0.461 | -1.474 | -0.138 | 0.451  | -0.589 |
| -0.198 | -0.673 | 0.278  | -0.109 | 0.388  |
| -0.219 | 0.171  | 0.389  | 0.072  | 0.318  |
| 1.262  | 1.317  | 0.028  | 0.251  | -0.223 |
| -1.378 | -1.320 | 0.292  | 0.072  | 0.220  |
| -0.503 | -0.255 | -0.269 | -0.206 | -0.063 |
| 1.333  | 1.784  | 0.543  | -0.452 | 0.995  |
| -2.912 | -3.073 | -0.480 | 0.028  | -0.507 |
| -0.461 | -0.193 | -0.066 | -0.231 | 0.165  |
| -2.778 | -2.382 | -0.466 | 0.107  | -0.574 |
| -1.193 | -0.600 | 0.197  | -0.373 | 0.570  |
| -2.516 | -2.782 | 0.011  | -0.362 | 0.373  |
| 1.258  | 1.589  | 0.856  | -0.368 | 1.224  |
| -0.001 | -0.284 | 0.181  | 0.229  | -0.048 |
| -0.077 | 0.329  | -0.322 | -0.251 | -0.071 |
| 0.379  | 0.527  | 0.473  | -0.034 | 0.507  |
| -2.106 | -1.695 | 0.313  | -0.507 | 0.821  |
| -1.589 | -2.056 | -0.133 | 0.039  | -0.171 |
| -2.809 | -1.905 | -0.146 | -0.475 | 0.329  |
| -2.591 | -2.125 | 0.379  | -0.289 | 0.668  |
| -3.239 | -2.836 | 0.100  | -0.744 | 0.845  |
| -2.558 | -2.209 | 0.021  | 0.016  | 0.005  |
| -3.177 | -2.373 | -0.046 | -1.062 | 1.016  |
| -3.089 | -2.412 | -1.190 | -0.568 | -0.622 |
| 0.400  | 1.017  | 0.110  | -0.528 | 0.639  |
| -2.241 | -1.648 | 0.161  | -0.460 | 0.620  |
| -1.497 | -1.804 | -0.045 | 0.107  | -0.152 |
| -2.635 | -2.794 | -0.203 | 0.434  | -0.637 |
| -1.399 | -1.736 | 0.170  | -0.123 | 0.293  |
| -2.480 | -1.722 | -0.014 | -0.147 | 0.132  |
| 1.590  | 1.916  | 0.446  | -0.630 | 1.076  |
| 0.113  | -0.440 | 0.272  | 0.336  | -0.063 |
| 1.593  | 1.702  | 0.284  | 0.154  | 0.130  |
| -2.045 | -1.567 | 0.060  | -0.426 | 0.486  |
| -1.610 | -1.333 | 0.066  | -0.421 | 0.487  |
| -3.171 | -3.153 | 0.108  | 0.104  | 0.005  |
| -2.401 | -1.786 | -0.238 | -0.862 | 0.624  |
| -2.879 | -2.404 | -0.058 | 0.187  | -0.245 |
| -1.441 | -0.727 | -0.307 | -1.381 | 1.074  |
| -2.401 | -2.883 | -0.126 | -0.266 | 0.141  |
| -0.536 | 0.439  | 0.402  | -0.565 | 0.967  |
| 1.717  | 1.647  | 0.558  | -0.054 | 0.611  |
| -0.740 | -0.681 | 0.233  | -0.242 | 0.475  |
| -0.256 | -0.810 | -0.383 | -0.508 | 0.124  |
| -0.509 | 0.225  | 0.399  | -0.445 | 0.844  |
| -3.562 | -3.572 | 0.069  | -0.297 | 0.366  |
| -2.881 | -2.607 | 0.075  | 0.177  | -0.102 |
| -2.329 | -1.933 | 0.431  | -0.066 | 0.497  |
| 1.299  | 0.889  | 1.135  | 0.713  | 0.422  |
| -1.598 | -1.084 | 0.043  | -0.709 | 0.752  |

|        |        |        |        |        |
|--------|--------|--------|--------|--------|
| -2.805 | -2.236 | 0.044  | -0.446 | 0.490  |
| -2.290 | -1.500 | 0.362  | -0.698 | 1.059  |
| -1.331 | -0.795 | 0.314  | -1.250 | 1.564  |
| -1.382 | -0.691 | -0.030 | -0.954 | 0.924  |
| -1.530 | -1.256 | 0.164  | -0.513 | 0.677  |
| -2.134 | -2.232 | -0.157 | 0.110  | -0.268 |
| -1.814 | -1.412 | 0.035  | -0.362 | 0.397  |
| 0.245  | 0.657  | -0.208 | -0.689 | 0.482  |
| -0.680 | -0.763 | 1.742  | -0.377 | 2.119  |
| -2.481 | -1.687 | -0.061 | -0.379 | 0.318  |
| -0.871 | -0.594 | -0.003 | -0.097 | 0.094  |
| 0.029  | 0.148  | 0.329  | 0.832  | -0.502 |
| -0.985 | -0.468 | 0.177  | -0.390 | 0.567  |
| -1.116 | -1.067 | 0.115  | -0.240 | 0.355  |
| -3.111 | -2.848 | -0.430 | 0.606  | -1.035 |
| 0.722  | 1.343  | 0.488  | -0.414 | 0.902  |
| -0.812 | -0.429 | 0.203  | 0.039  | 0.163  |
| -4.180 | -4.026 | -0.388 | -0.295 | -0.093 |
| -1.585 | -1.668 | 0.400  | -0.277 | 0.677  |
| 0.172  | 0.379  | 0.328  | -0.092 | 0.420  |
| -0.729 | -0.153 | 0.434  | -0.577 | 1.010  |
| 0.579  | 0.207  | 0.267  | 0.046  | 0.221  |
| -1.252 | -0.675 | 0.414  | -0.382 | 0.795  |
| 0.132  | 0.023  | -0.433 | -0.046 | -0.388 |
| -2.610 | -2.505 | 0.598  | 0.488  | 0.109  |
| -0.780 | -0.546 | 0.699  | -0.456 | 1.156  |
| -1.111 | -0.354 | 0.270  | -1.216 | 1.486  |
| -2.026 | -2.526 | 0.160  | -0.101 | 0.262  |
| -3.761 | -3.246 | -0.372 | 0.595  | -0.967 |
| -2.842 | -2.408 | -0.273 | 0.064  | -0.337 |
| -0.958 | -0.730 | 0.613  | -0.089 | 0.702  |
| -3.012 | -2.733 | 0.025  | -0.224 | 0.249  |
| -0.958 | -0.849 | 0.104  | 0.019  | 0.086  |
| -1.133 | -1.916 | -0.265 | -0.463 | 0.198  |
| -0.344 | 0.104  | 0.168  | 0.292  | -0.124 |
| 2.291  | 1.954  | 0.328  | 0.089  | 0.239  |
| 2.010  | 2.086  | 0.738  | 0.399  | 0.340  |
| 1.600  | 0.622  | 0.104  | 0.203  | -0.098 |
| 0.291  | -0.429 | 0.969  | 0.594  | 0.375  |
| 0.737  | -0.107 | 0.265  | 0.356  | -0.090 |
| 2.245  | 1.761  | 0.674  | 0.601  | 0.074  |
| 0.021  | -0.233 | -0.046 | 0.038  | -0.084 |
| 1.466  | 0.809  | 0.139  | -0.021 | 0.160  |
| 3.326  | 2.717  | 0.034  | -0.169 | 0.202  |
| -1.242 | -1.393 | 0.506  | 0.538  | -0.032 |
| 1.965  | 1.914  | -0.187 | 0.186  | -0.373 |
| -1.799 | -0.462 | -0.920 | -0.681 | -0.238 |
| 1.904  | 0.773  | 1.462  | 0.114  | 1.348  |
| -2.129 | -1.737 | -0.468 | 0.634  | -1.103 |
| -1.150 | -0.221 | -0.536 | -0.044 | -0.492 |
| 1.512  | 1.868  | 0.656  | -0.454 | 1.110  |

|        |        |        |        |        |
|--------|--------|--------|--------|--------|
| -1.267 | -1.045 | -0.471 | -0.905 | 0.434  |
| 1.403  | 0.663  | -0.216 | 0.203  | -0.419 |
| -0.038 | -1.960 | -0.160 | -0.105 | -0.055 |
| 0.349  | 0.860  | 0.038  | -0.651 | 0.689  |
| 0.920  | 0.737  | -0.120 | -0.054 | -0.066 |
| -3.762 | -2.254 | -0.110 | -0.011 | -0.099 |
| -3.637 | -3.091 | -0.917 | -0.481 | -0.436 |
| -4.531 | -1.833 | -1.140 | -1.032 | -0.107 |
| -1.116 | -0.123 | -0.240 | -0.775 | 0.535  |
| -1.083 | -1.006 | -0.194 | -0.282 | 0.088  |
| -2.203 | -2.022 | -0.030 | 0.110  | -0.140 |
| 0.630  | 0.132  | -0.387 | 0.098  | -0.485 |
| -0.376 | -1.320 | 0.409  | -0.131 | 0.540  |
| -2.223 | -2.000 | -0.132 | -0.013 | -0.119 |
| -2.750 | -2.542 | 0.277  | -0.197 | 0.474  |
| -2.191 | -1.899 | -0.582 | -0.166 | -0.416 |
| 0.404  | -0.298 | -0.613 | -0.167 | -0.446 |
| 2.396  | 1.883  | 0.406  | 0.449  | -0.043 |
| 0.349  | 0.287  | 0.603  | -0.183 | 0.785  |
| 1.089  | 1.355  | 0.223  | 0.406  | -0.182 |
| -0.421 | -0.270 | 0.349  | 0.050  | 0.299  |
| 1.293  | 1.098  | 0.324  | 0.398  | -0.074 |
| 0.594  | -0.464 | 0.378  | -0.053 | 0.431  |
| -0.677 | -0.717 | 0.067  | -0.346 | 0.413  |
| -0.289 | 0.256  | -0.085 | -0.516 | 0.430  |
| -0.025 | -1.046 | -0.865 | -0.325 | -0.540 |
| -0.786 | -0.405 | 0.129  | -0.171 | 0.301  |
| -0.669 | -0.584 | -0.158 | 0.433  | -0.591 |
| 0.367  | 0.287  | -0.136 | -0.146 | 0.010  |
| -1.101 | -1.819 | -0.075 | 0.136  | -0.211 |
| 1.162  | 1.094  | 0.934  | 0.459  | 0.476  |
| 1.851  | 1.625  | -0.208 | -0.572 | 0.364  |
| -1.893 | -2.200 | 0.037  | 0.136  | -0.098 |
| -0.367 | -0.494 | 0.504  | -0.288 | 0.792  |
| 0.465  | -0.152 | 0.480  | 0.043  | 0.437  |
| 0.320  | 0.588  | -0.730 | -0.269 | -0.460 |
| 1.472  | 0.528  | 0.248  | 0.241  | 0.007  |
| -1.111 | -0.919 | 0.331  | -0.075 | 0.406  |
| 2.581  | 1.451  | 0.643  | 0.551  | 0.092  |
| -1.640 | -1.259 | -0.643 | -0.533 | -0.110 |
| -0.372 | -1.377 | 0.052  | -0.162 | 0.214  |
| 1.235  | 1.165  | 0.320  | 0.325  | -0.005 |
| 2.147  | 1.643  | -0.172 | -0.057 | -0.116 |
| 1.174  | -0.671 | -0.102 | 0.397  | -0.499 |
| 1.194  | 0.283  | -0.790 | -0.233 | -0.557 |
| 0.029  | 0.242  | -0.036 | -0.354 | 0.318  |
| 0.020  | -0.304 | -0.089 | -0.067 | -0.022 |
| 0.637  | 0.938  | -0.248 | 0.383  | -0.630 |
| 2.056  | 1.403  | 0.548  | -0.272 | 0.820  |
| 1.585  | 0.831  | -0.032 | 0.017  | -0.049 |
| -0.304 | -0.403 | 0.269  | -0.202 | 0.471  |



|        |        |        |        |        |
|--------|--------|--------|--------|--------|
| -1.322 | -1.674 | 0.506  | 0.264  | 0.241  |
| 1.023  | 0.068  | -0.054 | 0.047  | -0.101 |
| -0.006 | 0.919  | -0.014 | -0.064 | 0.049  |
| 1.853  | 0.909  | -0.168 | 0.374  | -0.542 |
| -1.314 | -1.162 | 0.030  | 0.009  | 0.020  |
| -2.006 | -0.937 | 0.118  | -0.426 | 0.544  |
| 0.421  | -0.638 | 0.243  | -0.066 | 0.308  |
| -1.279 | -0.060 | -0.403 | -0.284 | -0.118 |
| 1.955  | 1.989  | 0.070  | -0.174 | 0.244  |
| 1.022  | 1.219  | -0.210 | -0.300 | 0.089  |
| -1.624 | -1.595 | -0.088 | -0.376 | 0.288  |
| 0.812  | 0.123  | -0.076 | 0.799  | -0.875 |
| -1.920 | -1.424 | -0.145 | -0.195 | 0.050  |
| -2.354 | -1.399 | 0.585  | 0.050  | 0.535  |
| -1.765 | -1.246 | 1.028  | 0.288  | 0.740  |
| -1.356 | -0.832 | 0.549  | 0.312  | 0.238  |
| 0.969  | 0.178  | 0.435  | -0.097 | 0.532  |
| -0.189 | -0.097 | -0.428 | -0.981 | 0.553  |
| -1.107 | -0.406 | -0.791 | -0.711 | -0.080 |
| -0.469 | -1.211 | 0.074  | -0.142 | 0.215  |
| -1.234 | -1.071 | -0.030 | -0.287 | 0.257  |
| -1.182 | 0.362  | -1.026 | -0.513 | -0.513 |
| -0.807 | -0.442 | -0.232 | -0.246 | 0.014  |
| -0.362 | -1.176 | 0.081  | -0.148 | 0.229  |
| -1.504 | -0.690 | 0.192  | -0.541 | 0.733  |
| 2.224  | 1.951  | -1.095 | -1.313 | 0.218  |
| 1.165  | 0.627  | 0.494  | 0.891  | -0.396 |
| -2.839 | -2.144 | 0.473  | -1.175 | 1.649  |
| 0.443  | 0.333  | 0.094  | 1.015  | -0.921 |
| -1.272 | -0.305 | -0.141 | 0.767  | -0.908 |
| -1.494 | -1.362 | -1.090 | -0.266 | -0.823 |
| -1.653 | -1.574 | 0.062  | 0.481  | -0.419 |
| -1.541 | -0.683 | 0.521  | -0.520 | 1.040  |
| -3.557 | -3.029 | -0.091 | -0.628 | 0.537  |
| -2.274 | -1.567 | 0.179  | -0.447 | 0.626  |
| -2.742 | -1.998 | 0.170  | -0.557 | 0.728  |
| 2.056  | 1.583  | 0.415  | -0.193 | 0.608  |
| -1.043 | -1.772 | -0.374 | 0.010  | -0.384 |
| 2.015  | 1.019  | 0.063  | -0.099 | 0.161  |
| 0.755  | 1.086  | 0.201  | 0.183  | 0.017  |
| 0.348  | 0.515  | -0.059 | -0.163 | 0.104  |
| 0.050  | -0.689 | 0.206  | 0.873  | -0.667 |
| -0.585 | -0.216 | -1.181 | -0.664 | -0.517 |
| 0.442  | 0.491  | -1.569 | -0.424 | -1.145 |
| 0.031  | 0.039  | -0.258 | 0.211  | -0.470 |
| 0.672  | 0.085  | 0.188  | 0.784  | -0.596 |
| 0.244  | -0.132 | 0.021  | 1.047  | -1.027 |
| 1.870  | 1.004  | 0.292  | 0.134  | 0.158  |
| 1.056  | 1.640  | 0.250  | 0.172  | 0.078  |
| 0.854  | 0.707  | -0.017 | 0.198  | -0.215 |
| 1.358  | 1.218  | -0.635 | -0.232 | -0.404 |

|        |        |        |        |        |
|--------|--------|--------|--------|--------|
| 0.228  | -0.849 | 0.256  | -0.085 | 0.341  |
| 0.807  | 1.116  | 0.310  | -0.231 | 0.540  |
| -1.656 | -2.212 | 0.271  | -0.583 | 0.855  |
| -3.351 | -2.433 | -0.276 | -0.329 | 0.053  |
| -3.677 | -3.065 | 0.000  | -0.102 | 0.103  |
| 1.828  | 1.482  | 0.020  | -0.081 | 0.102  |
| 1.248  | 0.453  | -0.034 | 0.737  | -0.772 |
| 0.470  | 0.153  | 0.280  | 0.296  | -0.016 |
| 0.685  | 1.093  | -0.562 | -0.403 | -0.160 |
| 0.098  | -0.157 | -0.398 | 0.106  | -0.504 |
| -0.582 | 0.080  | 0.743  | -0.232 | 0.975  |
| -2.134 | -0.954 | -0.130 | -0.721 | 0.591  |
| -0.519 | -1.314 | 0.431  | 0.431  | 0.000  |
| -0.042 | -0.664 | 0.288  | 0.219  | 0.069  |
| -2.232 | -1.897 | 0.287  | -0.189 | 0.476  |
| 1.254  | -0.107 | 0.282  | 0.365  | -0.082 |
| 1.027  | 0.038  | -1.362 | -0.498 | -0.863 |
| 0.064  | -0.557 | 0.125  | 0.303  | -0.178 |
| -0.182 | -0.018 | 0.540  | -0.502 | 1.043  |
| 1.448  | 1.847  | 0.195  | 0.469  | -0.275 |
| -0.341 | -1.575 | 0.330  | 0.758  | -0.429 |
| 0.182  | 1.452  | 0.350  | -0.374 | 0.724  |
| -0.303 | -0.191 | 0.180  | -0.571 | 0.751  |
| 1.006  | 0.433  | -1.189 | -0.426 | -0.762 |
| 0.866  | 1.140  | 0.351  | -0.179 | 0.531  |
| -3.731 | -2.931 | -0.162 | 0.663  | -0.825 |
| -0.711 | -0.293 | -0.098 | -0.533 | 0.435  |
| 0.925  | 0.978  | 0.062  | 0.008  | 0.053  |
| -0.265 | 0.318  | -0.443 | -0.320 | -0.123 |
| 0.429  | -0.289 | 0.209  | -0.236 | 0.445  |
| -0.927 | -0.469 | -0.413 | -0.696 | 0.283  |
| -2.825 | -3.411 | 0.299  | 0.022  | 0.277  |
| 0.333  | -0.051 | 0.239  | -0.430 | 0.669  |
| 0.139  | 0.100  | -0.035 | -0.163 | 0.128  |
| -2.017 | -1.524 | 0.670  | -0.053 | 0.723  |
| 1.636  | 2.028  | -0.039 | -0.205 | 0.165  |
| 0.435  | 0.783  | -1.329 | -0.873 | -0.456 |
| 1.550  | 1.795  | 0.326  | -0.239 | 0.565  |
| -1.269 | -2.023 | -0.020 | 0.919  | -0.939 |
| 1.674  | 0.897  | 0.085  | -0.188 | 0.273  |
| -1.895 | -1.418 | -0.293 | -0.343 | 0.050  |
| -3.096 | -2.588 | -0.174 | 0.721  | -0.895 |
| -0.613 | -0.634 | 0.044  | -0.305 | 0.349  |
| 1.258  | 1.166  | -0.493 | -0.035 | -0.458 |
| -1.992 | -1.548 | -0.325 | -0.105 | -0.220 |
| 1.396  | 0.498  | 0.426  | 0.478  | -0.052 |
| -1.378 | -1.774 | 0.179  | 0.269  | -0.091 |
| -2.802 | -2.071 | -0.106 | -0.393 | 0.286  |
| -1.378 | -0.812 | -0.218 | -0.211 | -0.007 |
| -0.551 | -0.087 | -0.102 | -0.476 | 0.374  |
| 1.311  | 0.292  | 0.337  | 0.162  | 0.175  |

|        |        |        |        |        |
|--------|--------|--------|--------|--------|
| -1.338 | -1.609 | 0.164  | 0.139  | 0.026  |
| -1.198 | -1.523 | -0.092 | -0.013 | -0.079 |
| -3.239 | -2.154 | -0.100 | 0.562  | -0.662 |
| 2.182  | 1.873  | 1.486  | 0.607  | 0.878  |
| 0.083  | 0.260  | 0.024  | 0.346  | -0.322 |
| -0.928 | -0.608 | 0.549  | -0.507 | 1.056  |
| 0.291  | 1.050  | -0.107 | -0.928 | 0.820  |
| -0.238 | 1.177  | -0.469 | -0.505 | 0.036  |
| -0.504 | -0.149 | 0.325  | -0.693 | 1.017  |
| 1.438  | 1.504  | -0.402 | 0.024  | -0.426 |
| 1.212  | 1.172  | -0.865 | -0.220 | -0.645 |
| 1.264  | 0.622  | 0.165  | 0.453  | -0.288 |
| 0.873  | 0.330  | 0.485  | 0.776  | -0.291 |
| 1.278  | 0.305  | 0.639  | 0.635  | 0.004  |
| -0.045 | 0.138  | 0.122  | -0.073 | 0.195  |
| -1.314 | -1.887 | 0.029  | 0.279  | -0.250 |
| 0.720  | 0.440  | -0.522 | 0.417  | -0.939 |
| 0.205  | -0.125 | 0.101  | 0.395  | -0.294 |
| 0.242  | 0.179  | -0.281 | -0.111 | -0.171 |
| 0.376  | -0.181 | -0.200 | 0.164  | -0.364 |
| -1.243 | -2.251 | 0.186  | 0.761  | -0.575 |
| 0.294  | -0.276 | 0.173  | 0.214  | -0.042 |
| -1.292 | -1.423 | -0.081 | -0.087 | 0.006  |
| -1.341 | -1.056 | 0.045  | -0.283 | 0.328  |
| 0.011  | -0.164 | 0.104  | 0.159  | -0.055 |
| -0.002 | 0.225  | -0.157 | -0.269 | 0.112  |
| -0.237 | 0.034  | 0.095  | -0.079 | 0.174  |
| 2.640  | 1.743  | -0.873 | 0.127  | -1.000 |
| 2.617  | 1.873  | 0.605  | 0.121  | 0.484  |
| 0.931  | 1.561  | -0.452 | -0.580 | 0.128  |
| 1.938  | 0.278  | -0.052 | 0.266  | -0.319 |
| 0.946  | 0.704  | 0.065  | 0.210  | -0.145 |
| 0.970  | 1.431  | 0.190  | 0.128  | 0.061  |
| -0.759 | 0.258  | 0.302  | -0.090 | 0.392  |
| -2.008 | -0.863 | -0.038 | 0.941  | -0.979 |
| -0.341 | 0.955  | -0.316 | -0.466 | 0.150  |
| 1.313  | 0.673  | -0.237 | 0.424  | -0.661 |
| 2.570  | 1.443  | -0.378 | 0.522  | -0.900 |
| 1.041  | 0.435  | 0.336  | 0.435  | -0.099 |
| 1.001  | -0.117 | 0.361  | 0.687  | -0.326 |
| 0.526  | 0.872  | -0.180 | 0.100  | -0.280 |
| 0.234  | 1.065  | 0.343  | 0.507  | -0.164 |
| 1.601  | 0.468  | -0.032 | 0.151  | -0.182 |
| 0.330  | 0.262  | 0.252  | 0.497  | -0.245 |
| -1.115 | 0.715  | -0.625 | -0.698 | 0.073  |
| 1.339  | 0.328  | -0.579 | 0.315  | -0.894 |
| -0.229 | -0.117 | -0.042 | -0.467 | 0.425  |
| -1.212 | -1.112 | -0.100 | 0.233  | -0.333 |
| -1.988 | -2.430 | 0.432  | 0.306  | 0.126  |
| 0.720  | 1.917  | 0.059  | -0.331 | 0.389  |
| -0.367 | -0.127 | 0.348  | 0.051  | 0.297  |

|        |        |        |        |        |
|--------|--------|--------|--------|--------|
| -2.189 | -2.704 | -0.420 | -0.756 | 0.336  |
| -0.398 | -1.680 | -0.298 | -0.503 | 0.205  |
| 1.700  | 2.018  | -0.080 | -0.838 | 0.758  |
| 0.421  | 1.077  | 0.195  | -0.055 | 0.250  |
| -1.751 | -1.299 | -0.511 | -0.131 | -0.380 |
| -1.229 | -0.792 | -0.330 | -0.119 | -0.211 |
| -1.629 | -0.949 | -0.183 | -0.118 | -0.065 |
| 0.567  | 0.928  | -0.114 | 0.148  | -0.262 |
| 1.533  | 2.068  | -0.058 | -0.224 | 0.166  |
| -4.185 | -3.292 | -0.236 | -0.287 | 0.052  |
| -0.586 | -0.712 | 0.329  | -0.004 | 0.333  |
| -2.924 | -1.103 | -0.142 | -0.718 | 0.575  |
| -2.538 | -2.227 | 0.199  | -1.263 | 1.462  |
| -3.497 | -2.848 | -0.211 | -1.273 | 1.062  |
| -3.295 | -3.066 | -0.061 | -0.810 | 0.750  |
| -3.821 | -2.830 | -0.127 | -1.044 | 0.917  |
| -3.768 | -3.490 | -0.023 | -0.051 | 0.028  |
| -3.438 | -3.401 | 0.664  | 1.052  | -0.388 |
| -1.622 | -1.230 | 0.029  | -0.433 | 0.462  |
| -3.613 | -2.948 | -0.030 | -1.457 | 1.427  |
| -1.512 | -1.247 | -0.146 | -0.404 | 0.258  |
| -2.048 | -2.218 | -0.271 | -0.277 | 0.006  |
| -2.824 | -2.521 | 0.152  | -0.794 | 0.946  |
| 0.411  | 0.460  | 0.162  | 0.119  | 0.043  |
| -3.170 | -2.602 | -0.516 | 0.196  | -0.712 |
| -2.463 | -1.105 | -0.536 | -1.107 | 0.570  |
| -1.435 | -1.665 | 0.392  | -0.042 | 0.434  |
| -3.968 | -3.046 | -0.023 | 0.026  | -0.049 |
| -3.146 | -2.116 | -0.150 | -0.450 | 0.301  |
| -3.446 | -2.783 | 0.060  | -1.319 | 1.379  |
| -3.641 | -3.145 | 0.619  | -0.630 | 1.248  |
| -2.658 | -2.335 | 0.054  | 0.286  | -0.232 |
| -2.965 | -2.517 | -0.565 | -0.222 | -0.343 |
| -1.578 | -2.564 | 0.048  | -0.842 | 0.890  |
| -3.235 | -3.298 | 0.037  | -0.787 | 0.824  |
| -2.169 | -1.531 | -0.165 | -0.774 | 0.609  |
| -3.471 | -2.940 | 0.067  | -0.786 | 0.853  |
| -3.205 | -2.781 | 0.364  | -0.380 | 0.744  |
| -2.956 | -2.242 | 0.122  | -0.854 | 0.976  |
| 0.172  | -0.395 | 0.240  | 0.201  | 0.039  |
| -1.423 | -1.297 | 0.007  | -0.228 | 0.235  |
| -2.722 | -2.247 | 0.107  | -0.187 | 0.294  |
| -2.598 | -2.231 | 0.311  | -0.489 | 0.801  |
| -3.750 | -3.321 | 0.340  | 0.063  | 0.277  |
| -3.688 | -2.698 | 0.713  | -1.136 | 1.849  |
| -3.286 | -0.846 | -0.307 | -0.736 | 0.429  |
| -3.246 | -2.420 | 0.351  | -1.290 | 1.641  |
| -2.062 | -1.488 | 0.031  | -0.624 | 0.656  |
| -3.373 | -3.135 | -0.064 | 0.136  | -0.200 |
| -0.868 | 0.358  | -0.094 | -0.009 | -0.086 |
| -0.421 | 0.592  | 0.551  | -0.091 | 0.642  |

|        |        |        |        |        |
|--------|--------|--------|--------|--------|
| -1.807 | -1.254 | 0.251  | -0.478 | 0.729  |
| -1.309 | -1.605 | 0.766  | 0.478  | 0.288  |
| 1.271  | 1.227  | 0.327  | 0.160  | 0.166  |
| 0.011  | -0.833 | 0.179  | 0.437  | -0.258 |
| 1.121  | -0.151 | 0.404  | 0.341  | 0.063  |
| 0.848  | 0.543  | 0.241  | -0.084 | 0.326  |
| 2.972  | 2.316  | -0.026 | -0.086 | 0.059  |
| -1.565 | -0.923 | 0.726  | -0.287 | 1.013  |
| 0.105  | -0.873 | -0.075 | -0.175 | 0.101  |
| -0.586 | -0.973 | 0.139  | 0.177  | -0.038 |
| -0.832 | -1.484 | 1.064  | 0.425  | 0.639  |
| -0.826 | -1.064 | 0.464  | 0.399  | 0.065  |
| 0.909  | 0.329  | 0.386  | 0.182  | 0.205  |
| 0.523  | 0.823  | 0.174  | -0.228 | 0.402  |
| 1.537  | -0.723 | 0.394  | 0.275  | 0.119  |
| 0.911  | 0.661  | -0.283 | -0.154 | -0.129 |
| -1.599 | -0.714 | -0.020 | -0.757 | 0.737  |
| 0.647  | 0.224  | 0.493  | 0.378  | 0.115  |
| -1.354 | -0.994 | 0.251  | 0.586  | -0.334 |
| -2.084 | -1.578 | -0.207 | -1.395 | 1.188  |
| 0.516  | 0.836  | -0.483 | 0.616  | -1.099 |
| -1.006 | -0.356 | 0.756  | 1.532  | -0.776 |
| 0.615  | 0.075  | -0.397 | -0.072 | -0.325 |
| 2.747  | 1.964  | -0.030 | 0.367  | -0.397 |
| 0.462  | 0.728  | 0.607  | 0.108  | 0.499  |
| 3.273  | 2.332  | 0.279  | 0.466  | -0.188 |
| -0.506 | -0.079 | 0.119  | -0.517 | 0.636  |
| 0.320  | 0.458  | 0.472  | -0.041 | 0.513  |
| -0.359 | 0.158  | 0.210  | -0.171 | 0.381  |
| -2.368 | -1.259 | -0.397 | 0.519  | -0.916 |
| 1.545  | 0.624  | 0.498  | 0.738  | -0.240 |
| -0.268 | 0.072  | -0.147 | -0.712 | 0.564  |
| 0.731  | 0.554  | -0.637 | 0.001  | -0.637 |
| 1.203  | 1.594  | -0.060 | -0.534 | 0.475  |
| 0.722  | 0.810  | 0.204  | 0.145  | 0.059  |
| 2.071  | 1.435  | 0.414  | 0.444  | -0.030 |
| 1.329  | 1.821  | -0.139 | 0.507  | -0.646 |
| 2.157  | 2.016  | -0.585 | -0.062 | -0.523 |
| 1.532  | 0.813  | -0.227 | -0.424 | 0.197  |
| 0.852  | 0.669  | 0.006  | -0.083 | 0.089  |
| -0.537 | 1.248  | -0.189 | -0.572 | 0.383  |
| 3.100  | 3.504  | 0.311  | -0.052 | 0.363  |
| -1.364 | -0.107 | 0.080  | -0.702 | 0.783  |
| 0.534  | 0.663  | -0.160 | 0.263  | -0.422 |
| -1.831 | -1.203 | 0.352  | -0.315 | 0.667  |
| 0.863  | -0.433 | 0.252  | -0.145 | 0.397  |
| -2.827 | -2.036 | 0.403  | -0.382 | 0.785  |
| 1.196  | 1.466  | 0.309  | -0.430 | 0.740  |
| -1.091 | -0.272 | 0.233  | -0.070 | 0.303  |
| -0.087 | -0.869 | 0.231  | 0.359  | -0.128 |
| 0.725  | 0.722  | -0.111 | -0.033 | -0.077 |

|        |        |        |        |        |
|--------|--------|--------|--------|--------|
| 0.923  | 1.275  | 0.642  | 0.167  | 0.476  |
| -2.358 | -2.404 | 0.198  | 0.205  | -0.008 |
| 1.119  | 0.639  | -0.148 | -0.055 | -0.093 |
| 0.131  | -0.235 | 0.189  | 0.111  | 0.079  |
| 2.766  | 2.160  | 0.089  | 0.224  | -0.135 |
| -1.582 | -2.266 | 0.591  | 0.411  | 0.181  |
| -2.001 | -1.775 | -0.361 | -0.128 | -0.232 |
| -1.375 | -1.099 | -0.215 | -0.055 | -0.160 |
| -2.536 | -2.385 | -0.568 | 0.100  | -0.669 |
| -0.053 | -0.595 | 0.285  | -0.165 | 0.450  |
| 0.954  | 1.525  | 0.346  | 0.334  | 0.013  |
| -1.008 | -1.048 | -0.800 | -0.661 | -0.139 |
| 1.565  | 0.052  | 0.166  | -0.073 | 0.239  |
| -0.060 | -0.679 | -0.198 | 0.086  | -0.283 |
| -3.020 | -2.571 | -0.031 | 0.394  | -0.425 |
| -1.900 | -1.393 | -0.043 | -0.117 | 0.074  |
| 1.536  | 1.139  | 0.259  | 0.472  | -0.213 |
| 1.419  | 1.373  | 0.564  | -0.055 | 0.619  |
| 0.176  | 0.222  | -0.204 | -0.154 | -0.050 |
| 0.864  | 1.455  | 0.156  | -0.925 | 1.081  |
| 0.118  | 0.312  | 0.326  | -0.225 | 0.551  |
| 0.212  | 0.227  | 0.178  | -0.121 | 0.299  |
| 1.695  | 0.917  | 0.279  | 0.482  | -0.203 |
| 0.839  | 0.355  | 0.064  | -0.008 | 0.073  |
| 0.203  | -0.056 | 0.471  | 0.056  | 0.415  |
| 1.237  | 0.567  | 0.313  | 1.006  | -0.693 |
| -2.539 | -2.233 | 0.119  | -0.655 | 0.774  |
| -0.799 | -1.167 | 1.012  | -0.398 | 1.410  |
| 0.010  | 0.482  | 0.508  | -0.309 | 0.817  |
| 0.398  | 0.837  | -0.045 | -0.374 | 0.329  |
| -2.956 | -2.996 | -0.022 | -0.217 | 0.195  |
| -1.384 | -1.171 | -0.299 | -0.749 | 0.450  |
| -3.000 | -3.016 | 0.085  | 0.042  | 0.043  |
| 0.829  | 2.235  | -0.255 | -0.926 | 0.671  |
| -0.429 | -0.651 | 0.360  | -0.067 | 0.427  |
| -1.659 | -0.665 | -0.154 | -0.063 | -0.091 |
| 2.205  | 2.059  | 0.056  | 0.606  | -0.550 |
| -0.764 | -0.661 | 0.634  | 0.320  | 0.314  |
| 0.690  | 1.138  | -0.347 | -1.039 | 0.692  |
| -0.740 | -1.129 | -0.108 | -0.575 | 0.467  |
| 0.328  | 1.351  | 0.597  | 0.191  | 0.406  |
| 0.107  | -0.607 | 0.699  | 0.169  | 0.531  |
| 0.132  | -0.249 | 0.257  | 0.436  | -0.179 |
| 1.127  | 1.264  | 0.002  | -0.268 | 0.270  |
| 1.102  | 1.514  | 0.422  | 0.193  | 0.229  |
| -0.826 | -1.709 | -0.290 | 0.324  | -0.614 |
| -2.761 | -2.401 | 0.043  | -0.383 | 0.426  |
| -2.748 | -1.760 | -0.043 | -0.467 | 0.424  |
| 1.732  | 1.687  | 0.260  | 0.005  | 0.255  |
| -0.210 | -0.671 | 0.837  | -0.184 | 1.022  |
| -0.333 | 0.132  | -0.166 | -0.660 | 0.494  |

|        |        |        |        |        |
|--------|--------|--------|--------|--------|
| -0.821 | -0.632 | 0.237  | -0.616 | 0.853  |
| 0.543  | 0.773  | -0.030 | -0.101 | 0.070  |
| -0.148 | -0.168 | 0.204  | -0.005 | 0.209  |
| 0.272  | 0.540  | -0.369 | -0.232 | -0.137 |
| 0.881  | 0.077  | -0.249 | 0.962  | -1.211 |
| 1.183  | 0.992  | 0.234  | -0.223 | 0.457  |
| 0.325  | 0.494  | -0.239 | 0.012  | -0.252 |
| -2.071 | -1.555 | -0.195 | 0.365  | -0.560 |
| -0.149 | -1.462 | 0.227  | 0.579  | -0.352 |
| -2.937 | -2.009 | -0.308 | -0.493 | 0.185  |
| 1.751  | 1.834  | -0.092 | -0.370 | 0.277  |
| 1.722  | 2.314  | -0.416 | -0.566 | 0.150  |
| -1.837 | -2.069 | 0.154  | 0.035  | 0.119  |
| 0.047  | -0.747 | 0.442  | 0.760  | -0.318 |
| -2.158 | -1.918 | -0.047 | 0.045  | -0.092 |
| -1.146 | -0.513 | 0.293  | -0.722 | 1.014  |
| 0.609  | 0.909  | 0.073  | 0.062  | 0.011  |
| -3.006 | -2.712 | -0.087 | 0.052  | -0.140 |
| -0.090 | -0.390 | 0.286  | 0.525  | -0.238 |
| 0.788  | 0.657  | 0.411  | -0.557 | 0.968  |
| -2.220 | -2.446 | -0.677 | 0.212  | -0.889 |
| 0.175  | 0.425  | -0.123 | -0.039 | -0.084 |
| -0.091 | -0.107 | -0.544 | 0.908  | -1.452 |
| 0.035  | 0.137  | -0.841 | 0.718  | -1.559 |
| 0.070  | -0.018 | -1.052 | 1.199  | -2.251 |
| -1.210 | -1.388 | 0.037  | 0.536  | -0.499 |
| -1.220 | -0.771 | 0.180  | -0.631 | 0.812  |
| -2.323 | -1.748 | -0.345 | 0.151  | -0.496 |
| -1.214 | -1.055 | -0.272 | -0.499 | 0.227  |
| -0.704 | 0.144  | 0.073  | 0.313  | -0.240 |
| -0.983 | 0.678  | -0.542 | 0.285  | -0.826 |
| -2.909 | -3.037 | -0.071 | 0.244  | -0.315 |
| -2.655 | -0.890 | -0.453 | -0.658 | 0.205  |
| 1.029  | 1.081  | -0.043 | -0.039 | -0.004 |
| 1.889  | 1.542  | -0.224 | 0.781  | -1.005 |
| 0.067  | 0.572  | -0.167 | -0.023 | -0.145 |
| -0.353 | -0.157 | -0.935 | 0.020  | -0.955 |
| -0.385 | 0.128  | -0.706 | -0.762 | 0.055  |
| 1.054  | 0.531  | 0.481  | 0.329  | 0.151  |
| 0.540  | 0.309  | -0.082 | 0.324  | -0.406 |
| -3.388 | -2.829 | -0.098 | -0.155 | 0.058  |
| -1.799 | -0.792 | -0.185 | -0.992 | 0.807  |
| 0.339  | 0.138  | 0.085  | 0.137  | -0.052 |
| -0.273 | -0.065 | 0.518  | 0.045  | 0.472  |
| -0.564 | -0.805 | -0.745 | -0.427 | -0.318 |
| 0.870  | 0.868  | 0.122  | -0.088 | 0.209  |
| -3.625 | -3.482 | -0.307 | 1.376  | -1.683 |
| -3.779 | -3.689 | -0.267 | -0.679 | 0.412  |
| 0.998  | -0.065 | 0.037  | -0.155 | 0.192  |
| -1.659 | -1.717 | 0.123  | -0.008 | 0.131  |
| -2.105 | -1.096 | -0.479 | -0.672 | 0.193  |

|        |        |        |        |        |
|--------|--------|--------|--------|--------|
| -0.525 | -0.879 | -0.311 | 0.067  | -0.378 |
| 1.045  | 0.714  | -2.043 | -0.854 | -1.189 |
| -0.838 | -0.605 | -0.080 | 0.035  | -0.115 |
| -1.316 | -1.439 | -0.692 | -0.402 | -0.290 |
| -1.820 | -1.346 | 0.045  | -0.687 | 0.732  |
| -2.287 | -0.820 | -1.083 | -1.134 | 0.051  |
| 3.263  | 1.760  | -0.426 | -0.319 | -0.107 |
| -2.030 | -1.417 | -0.264 | -0.699 | 0.435  |
| -0.087 | 0.454  | 0.522  | -0.230 | 0.752  |
| -0.424 | -0.983 | 0.605  | 0.157  | 0.448  |
| 1.269  | 0.700  | 0.444  | 0.462  | -0.018 |
| -0.891 | -0.449 | 0.025  | -0.685 | 0.711  |
| 1.573  | 1.864  | -0.412 | -0.455 | 0.043  |
| 1.579  | 1.623  | -0.121 | -0.451 | 0.330  |
| 0.910  | 1.337  | 0.099  | -0.843 | 0.942  |
| 3.061  | 1.594  | 0.141  | 0.479  | -0.338 |
| 2.054  | 1.430  | 0.212  | 0.122  | 0.090  |
| 0.682  | 0.681  | -0.440 | -0.548 | 0.108  |
| 1.133  | 1.394  | -0.853 | -0.491 | -0.363 |
| 1.724  | 1.243  | -0.525 | -0.409 | -0.115 |
| 0.790  | 0.994  | -0.485 | -1.239 | 0.754  |
| 0.275  | -0.852 | -0.358 | -0.208 | -0.150 |
| -2.389 | -2.242 | 0.119  | -0.305 | 0.424  |
| -0.588 | -0.076 | -0.023 | -0.157 | 0.134  |
| 0.675  | 0.020  | -0.251 | 0.719  | -0.970 |
| -0.269 | -0.405 | 0.129  | 0.194  | -0.066 |
| -0.693 | -0.663 | 0.569  | 0.587  | -0.017 |
| 1.125  | 1.170  | 0.138  | -0.202 | 0.340  |
| -0.243 | -0.508 | -0.175 | 0.461  | -0.636 |
| -1.963 | -0.819 | 0.456  | -0.930 | 1.386  |
| 2.589  | 1.431  | -0.052 | 0.361  | -0.413 |
| -1.118 | -0.497 | 0.393  | -0.210 | 0.603  |
| 1.198  | 1.094  | -0.068 | 0.199  | -0.267 |
| -0.645 | 0.566  | 0.214  | 0.108  | 0.106  |
| -3.631 | -3.451 | 0.148  | 1.018  | -0.870 |
| 1.393  | 1.203  | 0.461  | 0.674  | -0.213 |
| 0.407  | 0.645  | 1.100  | 0.497  | 0.603  |
| 0.130  | -0.792 | 0.159  | 0.851  | -0.692 |
| -1.352 | -0.972 | 0.105  | 0.183  | -0.078 |
| 0.262  | -0.513 | 0.200  | 1.420  | -1.220 |
| -1.011 | -1.236 | 0.252  | -0.183 | 0.435  |
| -0.168 | -0.556 | -0.122 | -0.080 | -0.042 |
| -1.829 | -1.623 | -0.115 | -0.627 | 0.512  |
| -2.110 | -1.954 | 0.188  | -0.177 | 0.366  |
| -2.068 | -2.020 | 0.064  | -0.434 | 0.498  |
| -3.148 | -1.070 | -0.108 | 0.808  | -0.915 |
| 1.374  | 0.860  | 0.347  | -0.062 | 0.409  |
| 1.087  | -0.042 | 0.164  | 0.290  | -0.126 |
| 0.869  | 0.790  | 0.182  | 0.174  | 0.008  |
| -2.354 | -1.802 | -0.326 | 0.009  | -0.335 |
| 0.293  | -0.265 | 0.080  | 0.132  | -0.052 |



|        |        |        |        |        |
|--------|--------|--------|--------|--------|
| -2.034 | -0.979 | 0.429  | -0.449 | 0.878  |
| -0.122 | -0.362 | 0.406  | 0.195  | 0.211  |
| -1.487 | -1.851 | 0.262  | 0.197  | 0.066  |
| -0.094 | 0.249  | 0.477  | -0.087 | 0.564  |
| -0.653 | -1.471 | 0.753  | -0.276 | 1.029  |
| -2.150 | -1.556 | 0.003  | -0.552 | 0.554  |
| 1.796  | 1.816  | -0.744 | -0.852 | 0.108  |
| 0.168  | -0.729 | -1.023 | -0.002 | -1.021 |
| -0.507 | 0.003  | -0.121 | -0.972 | 0.851  |
| -1.901 | -1.767 | 0.287  | 0.021  | 0.265  |
| -1.579 | -1.123 | 0.017  | -0.588 | 0.606  |
| -0.156 | 0.383  | -0.288 | -0.055 | -0.233 |
| 1.953  | 1.464  | -0.151 | 0.208  | -0.359 |
| -1.226 | -1.186 | 0.121  | -0.326 | 0.446  |
| 1.418  | 2.350  | -0.297 | -0.138 | -0.158 |
| 2.356  | 1.824  | 0.332  | 0.331  | 0.001  |
| 1.871  | 2.101  | 0.536  | -0.293 | 0.828  |
| -2.525 | -2.424 | 0.274  | 0.202  | 0.072  |
| -2.206 | -1.915 | -0.160 | -0.275 | 0.115  |
| -1.978 | -1.492 | -0.101 | -0.423 | 0.323  |
| -0.163 | -0.521 | 0.257  | 0.197  | 0.059  |
| -1.744 | -1.063 | -0.238 | -0.128 | -0.110 |
| -3.705 | -3.409 | -0.097 | 0.508  | -0.605 |
| -1.678 | -2.076 | -0.539 | -0.008 | -0.532 |
| -2.301 | -1.497 | 0.104  | 0.601  | -0.497 |
| -0.386 | -1.010 | 0.091  | 0.267  | -0.176 |
| -0.111 | -0.231 | 0.320  | -2.927 | 3.247  |
| 2.356  | 2.164  | 0.207  | 0.119  | 0.088  |
| -2.172 | -1.299 | -0.009 | -0.208 | 0.199  |
| 1.413  | 0.398  | 0.446  | 0.007  | 0.438  |
| -0.351 | -0.636 | 0.195  | -0.091 | 0.286  |
| -1.866 | -0.866 | 0.363  | -0.445 | 0.808  |
| -2.071 | -2.012 | -0.424 | 0.238  | -0.662 |
| 0.077  | 0.811  | 0.538  | 0.061  | 0.477  |
| -1.603 | -0.868 | 0.027  | -0.450 | 0.477  |
| 0.623  | 0.944  | 0.363  | -0.681 | 1.043  |
| 0.279  | 0.162  | -0.322 | -0.547 | 0.225  |
| -1.180 | -0.739 | 0.535  | 0.209  | 0.326  |
| -0.534 | -1.784 | 0.129  | 0.103  | 0.026  |
| -0.891 | -0.489 | 0.613  | -0.849 | 1.462  |
| -1.820 | -1.888 | 0.220  | 0.042  | 0.178  |
| 0.665  | 0.438  | -0.383 | -0.585 | 0.202  |
| -1.964 | -1.471 | -0.067 | -0.787 | 0.721  |
| -0.870 | -0.771 | 0.080  | -0.076 | 0.157  |
| -2.272 | -2.412 | 0.124  | 0.179  | -0.054 |
| -1.513 | -0.854 | -0.149 | 0.941  | -1.090 |
| 2.024  | 1.114  | 0.008  | 0.099  | -0.091 |
| -0.574 | 0.294  | -0.133 | 0.515  | -0.648 |
| -1.064 | -0.894 | -0.211 | 0.084  | -0.295 |
| 0.212  | 0.446  | -0.334 | -0.485 | 0.151  |
| -0.457 | -0.880 | -0.077 | 0.419  | -0.495 |

|        |        |        |        |        |
|--------|--------|--------|--------|--------|
| 1.268  | 0.209  | 0.321  | 0.379  | -0.058 |
| 2.091  | 1.176  | 0.345  | 0.424  | -0.079 |
| 1.484  | 0.141  | 0.009  | 0.288  | -0.279 |
| 1.796  | 0.830  | 0.230  | 0.525  | -0.295 |
| 0.028  | 0.196  | -0.245 | 0.281  | -0.526 |
| 1.493  | 0.700  | 0.245  | 0.528  | -0.283 |
| 0.246  | 0.460  | -0.377 | 0.363  | -0.740 |
| 0.321  | 1.155  | -0.240 | 0.629  | -0.870 |
| -0.778 | -1.649 | -0.085 | 0.748  | -0.833 |
| -1.733 | -2.245 | -0.038 | -0.174 | 0.136  |
| -0.735 | -1.175 | -0.030 | -0.120 | 0.091  |
| 2.821  | 1.925  | 0.873  | 0.916  | -0.043 |
| -0.866 | -1.667 | -0.016 | 0.100  | -0.116 |
| 1.814  | 2.810  | -0.109 | -0.228 | 0.119  |
| -0.724 | -1.152 | -0.165 | -0.336 | 0.171  |
| -1.326 | -1.361 | 0.295  | -0.081 | 0.376  |
| -1.004 | -0.963 | 0.122  | 0.226  | -0.104 |
| -0.442 | -0.140 | -0.098 | -0.330 | 0.233  |
| 1.109  | 0.539  | 0.638  | 0.589  | 0.049  |
| 0.403  | -0.884 | 0.129  | 0.084  | 0.045  |
| 2.298  | 1.581  | -0.059 | 0.052  | -0.110 |
| -3.614 | -2.891 | 0.294  | -0.845 | 1.139  |
| -2.744 | -2.830 | -0.214 | 0.472  | -0.686 |
| -2.578 | -1.066 | 0.078  | 0.289  | -0.211 |
| -0.818 | -1.172 | 0.371  | 0.058  | 0.313  |
| -1.070 | -0.781 | 0.078  | -0.011 | 0.089  |
| 1.106  | 1.504  | 0.424  | -0.171 | 0.595  |
| -0.946 | 0.877  | -0.272 | -0.990 | 0.718  |
| 2.018  | 2.089  | 0.251  | -0.263 | 0.513  |
| -1.208 | -1.818 | -0.022 | -0.031 | 0.009  |
| -0.983 | -0.478 | -0.707 | -0.957 | 0.250  |
| -0.277 | -0.282 | 0.718  | 0.406  | 0.312  |
| -0.075 | -0.624 | 0.221  | 0.488  | -0.267 |
| -2.787 | -2.354 | -0.156 | -0.766 | 0.611  |
| -2.236 | -1.849 | 0.173  | -0.638 | 0.811  |
| -0.516 | -0.074 | 0.416  | 0.259  | 0.156  |
| -0.472 | 0.070  | -0.254 | -0.080 | -0.174 |
| -0.856 | -0.513 | 0.297  | -0.848 | 1.144  |
| -1.866 | -1.971 | -0.164 | -0.091 | -0.073 |
| -3.358 | -2.908 | -0.272 | -0.255 | -0.017 |
| 0.887  | 0.108  | 0.237  | -0.050 | 0.287  |
| -0.993 | -1.057 | 0.299  | 0.067  | 0.233  |
| -1.358 | -0.813 | 0.482  | 0.222  | 0.260  |
| -0.621 | -0.579 | 0.828  | 0.734  | 0.095  |
| 2.222  | 1.741  | 0.070  | 0.686  | -0.616 |
| -0.321 | -0.403 | 0.464  | 0.496  | -0.032 |
| 1.004  | 1.296  | -0.244 | 0.585  | -0.829 |
| -0.619 | -0.424 | -0.329 | -0.065 | -0.264 |
| 0.033  | -0.276 | 0.143  | -0.104 | 0.247  |
| -0.431 | -0.226 | 0.454  | -0.868 | 1.322  |
| 0.240  | 1.383  | 0.026  | -0.301 | 0.328  |

|        |        |        |        |        |
|--------|--------|--------|--------|--------|
| 1.027  | -0.208 | -0.379 | -0.402 | 0.023  |
| -1.645 | -1.464 | 0.166  | -0.492 | 0.659  |
| 1.449  | 0.478  | 0.198  | 0.577  | -0.379 |
| -0.563 | -0.995 | 0.623  | -0.097 | 0.720  |
| -3.099 | -3.111 | 0.472  | 0.900  | -0.429 |
| 2.273  | 2.491  | -0.972 | -1.015 | 0.044  |
| -0.046 | 1.128  | 0.335  | -0.564 | 0.899  |
| 0.432  | 0.771  | 0.934  | 0.586  | 0.347  |
| 0.749  | 0.881  | -0.695 | -0.674 | -0.022 |
| 1.353  | 1.751  | -0.219 | -0.385 | 0.165  |
| 0.291  | -0.499 | -0.069 | -0.326 | 0.256  |
| -0.264 | -0.962 | -0.023 | 0.939  | -0.962 |
| 0.320  | -0.345 | 0.060  | 0.088  | -0.028 |
| -0.852 | -0.587 | 0.541  | -0.310 | 0.850  |
| 3.097  | 2.205  | -0.828 | -0.492 | -0.336 |
| -2.040 | -1.094 | 0.155  | -0.249 | 0.403  |
| 0.812  | 1.773  | -0.007 | -0.218 | 0.212  |
| 1.682  | 1.735  | 0.733  | 0.484  | 0.249  |
| -0.122 | -0.129 | 0.423  | -0.285 | 0.708  |
| -2.242 | -1.513 | 0.195  | -0.660 | 0.855  |
| 0.367  | 0.457  | 0.076  | -0.080 | 0.156  |
| -0.541 | -1.250 | 0.150  | 0.082  | 0.067  |
| -1.389 | -1.851 | -0.010 | 0.514  | -0.524 |
| 0.011  | -0.625 | 0.375  | -0.013 | 0.388  |
| 0.392  | -0.223 | -0.316 | -0.097 | -0.219 |
| -1.472 | -1.549 | -0.052 | -0.283 | 0.231  |
| -1.152 | -1.268 | 0.076  | -0.111 | 0.188  |
| -0.817 | -0.455 | 0.164  | -0.186 | 0.350  |
| -1.817 | -1.023 | -0.189 | -0.313 | 0.124  |
| -1.237 | -0.794 | -0.512 | 0.196  | -0.708 |
| 1.385  | 1.305  | 0.141  | 0.146  | -0.005 |
| -1.413 | -0.597 | -0.227 | -0.145 | -0.081 |
| 1.107  | 0.561  | -0.296 | -0.121 | -0.175 |
| 2.763  | 1.735  | 0.348  | 0.583  | -0.235 |
| -0.016 | -0.872 | -0.036 | -0.147 | 0.111  |
| 1.308  | 1.839  | 0.177  | -0.170 | 0.347  |
| 0.146  | -0.477 | 0.285  | 0.116  | 0.169  |
| -1.101 | -0.836 | -0.324 | -1.211 | 0.887  |
| 0.091  | -0.326 | -0.160 | -0.054 | -0.106 |
| 0.202  | -1.156 | -0.065 | 0.204  | -0.269 |
| -0.274 | -1.020 | 0.150  | 0.238  | -0.088 |
| -1.244 | -0.836 | 2.268  | 0.366  | 1.902  |
| -2.175 | -1.905 | 0.138  | -0.241 | 0.379  |
| 1.385  | 0.452  | -0.477 | -0.266 | -0.212 |
| 1.073  | 1.586  | -0.283 | -0.793 | 0.509  |
| 2.363  | 1.172  | 0.568  | 0.125  | 0.443  |
| 0.782  | 0.614  | 0.076  | 0.618  | -0.542 |
| 1.201  | 1.685  | 0.234  | -0.520 | 0.754  |
| -2.419 | -1.606 | -0.172 | -0.449 | 0.277  |
| -0.244 | -0.347 | -0.116 | -0.733 | 0.618  |
| -1.843 | -2.068 | -0.025 | -0.398 | 0.373  |

|        |        |        |        |        |
|--------|--------|--------|--------|--------|
| -0.140 | -1.311 | 0.013  | 0.348  | -0.335 |
| -2.358 | -2.007 | 0.179  | -0.177 | 0.355  |
| 1.815  | 1.747  | 0.310  | -0.263 | 0.573  |
| -0.572 | -0.628 | 0.912  | 0.090  | 0.822  |
| 1.345  | 0.352  | -0.660 | 0.048  | -0.708 |
| -0.748 | -0.176 | -0.597 | -0.270 | -0.327 |
| -1.553 | -2.428 | -0.951 | -0.425 | -0.526 |
| 0.779  | 1.165  | -0.087 | 0.260  | -0.348 |
| -0.260 | -0.107 | 0.047  | 0.155  | -0.108 |
| -0.599 | -0.925 | -0.187 | 0.446  | -0.633 |
| 0.266  | -0.204 | -0.011 | -0.168 | 0.158  |
| 1.599  | 0.593  | 0.204  | 0.158  | 0.046  |
| 2.441  | 2.448  | 0.142  | 0.058  | 0.084  |
| 1.261  | 1.095  | 0.196  | 0.256  | -0.060 |
| -1.440 | -0.836 | 0.251  | -0.015 | 0.266  |
| 1.223  | 1.603  | -1.152 | -1.030 | -0.121 |
| -0.904 | -1.694 | -0.045 | 0.083  | -0.128 |
| -0.408 | -0.464 | -0.034 | 0.223  | -0.257 |
| -0.262 | 0.294  | -0.186 | -0.152 | -0.033 |
| -0.774 | -0.534 | -0.162 | -0.464 | 0.302  |
| -2.472 | -2.134 | -0.190 | 1.090  | -1.280 |
| 0.135  | 0.332  | -0.291 | -0.241 | -0.050 |
| -0.191 | -0.644 | 0.193  | 0.379  | -0.186 |
| -1.122 | -0.556 | -0.922 | -0.658 | -0.264 |
| -0.590 | -1.385 | 0.185  | 0.079  | 0.106  |
| -2.203 | -1.051 | -0.484 | -0.477 | -0.007 |
| 0.160  | 0.686  | 0.132  | -0.570 | 0.702  |
| -0.431 | -0.135 | 0.254  | -0.047 | 0.302  |
| -1.869 | -1.485 | 0.203  | -0.217 | 0.420  |
| -2.087 | -1.294 | 0.421  | 0.716  | -0.294 |
| 0.642  | -0.001 | 0.431  | 0.168  | 0.263  |
| 0.531  | -0.291 | -0.413 | -0.132 | -0.281 |
| -2.516 | -1.890 | 0.159  | -0.481 | 0.639  |
| 1.619  | 1.260  | -0.002 | -0.020 | 0.018  |
| -3.258 | -2.679 | -0.117 | -0.442 | 0.324  |
| -3.267 | -3.058 | -0.016 | 0.634  | -0.650 |
| -2.322 | -2.583 | 0.021  | 0.652  | -0.630 |
| -1.908 | -2.333 | -0.124 | 0.205  | -0.329 |
| -0.327 | -0.410 | 0.326  | -0.165 | 0.491  |
| -0.216 | -0.162 | 0.185  | 0.040  | 0.144  |
| -1.943 | -2.008 | 0.399  | 0.529  | -0.131 |
| 0.901  | 0.246  | 0.207  | 0.467  | -0.260 |
| -1.389 | -0.619 | -0.209 | -0.691 | 0.482  |
| 1.988  | 1.456  | 0.389  | 0.366  | 0.022  |
| -0.134 | -0.171 | -0.163 | -0.068 | -0.095 |
| -0.429 | 0.318  | -0.381 | -0.649 | 0.268  |
| 0.112  | -0.353 | -0.227 | 0.212  | -0.439 |
| 0.924  | 0.940  | -0.350 | -0.190 | -0.160 |
| 2.506  | 1.380  | 0.267  | 0.385  | -0.118 |
| 1.308  | 1.367  | 0.138  | 0.014  | 0.124  |
| 1.378  | 0.910  | 0.416  | -0.416 | 0.832  |

|        |        |        |        |        |
|--------|--------|--------|--------|--------|
| 2.335  | 0.758  | -0.773 | -0.103 | -0.670 |
| 0.510  | 0.824  | 0.297  | -0.346 | 0.644  |
| 2.503  | 1.815  | 0.676  | 0.352  | 0.324  |
| -0.607 | -1.619 | -0.729 | -0.447 | -0.282 |
| 0.661  | -0.073 | 0.560  | 0.461  | 0.099  |
| 1.862  | 1.727  | 0.261  | -0.067 | 0.328  |
| -0.086 | -1.252 | 0.170  | 0.585  | -0.416 |
| -0.606 | -1.563 | 0.044  | -0.360 | 0.405  |
| 1.737  | 1.189  | 0.039  | 0.489  | -0.451 |
| -0.199 | -0.284 | 0.190  | 0.045  | 0.145  |
| 0.633  | 0.580  | 0.297  | -0.302 | 0.598  |
| -0.729 | -1.881 | 0.220  | 0.099  | 0.121  |
| 1.682  | 2.548  | 0.133  | -0.444 | 0.578  |
| 0.454  | -0.033 | 0.656  | -0.242 | 0.897  |
| 0.930  | 1.436  | 0.070  | 0.135  | -0.065 |
| 0.196  | -0.095 | 0.214  | 0.080  | 0.134  |
| 1.465  | 1.793  | 1.011  | -0.297 | 1.309  |
| 1.075  | 0.809  | 0.269  | -0.293 | 0.562  |
| 0.301  | -0.252 | -0.200 | 0.290  | -0.490 |
| -2.066 | -1.744 | 0.135  | -0.147 | 0.282  |
| -1.520 | -1.210 | -0.073 | 0.180  | -0.252 |
| -1.329 | -1.855 | 0.098  | 0.369  | -0.271 |
| -0.734 | -0.593 | 0.246  | 0.741  | -0.494 |
| -0.149 | -0.104 | -0.079 | -0.226 | 0.147  |
| 1.207  | 0.732  | 0.481  | 0.820  | -0.339 |
| -1.087 | -0.907 | -0.251 | -0.468 | 0.217  |
| -1.465 | -1.614 | 0.278  | 0.077  | 0.201  |
| -1.511 | -1.100 | 0.488  | -0.171 | 0.660  |
| 0.841  | 0.260  | 0.307  | 0.599  | -0.292 |
| -0.713 | -0.451 | 0.782  | 0.181  | 0.600  |
| 1.862  | 1.256  | 0.462  | 0.329  | 0.133  |
| 1.032  | 0.854  | 0.385  | 0.203  | 0.182  |
| -0.892 | -2.439 | 0.245  | 0.125  | 0.120  |
| 2.615  | 2.615  | 0.081  | -0.527 | 0.608  |
| -0.630 | -0.313 | 0.022  | -0.174 | 0.195  |
| -2.469 | -1.627 | 0.163  | -0.400 | 0.563  |
| -0.774 | -0.530 | -0.079 | -0.052 | -0.027 |
| 1.270  | 1.257  | 1.026  | 0.326  | 0.700  |
| -1.376 | -0.859 | 0.353  | 0.391  | -0.038 |
| 1.796  | 1.844  | -0.026 | -0.007 | -0.018 |
| -0.151 | -0.969 | -0.145 | -0.109 | -0.036 |
| 2.157  | 2.001  | 0.001  | 0.007  | -0.006 |
| 0.710  | 1.133  | 0.146  | 0.160  | -0.013 |
| 0.203  | -0.463 | 0.036  | -0.111 | 0.147  |
| -0.715 | -0.835 | -0.079 | 0.188  | -0.267 |
| 0.776  | 0.144  | -0.204 | 0.585  | -0.789 |
| -1.159 | -1.241 | -0.578 | 0.333  | -0.911 |
| -0.296 | -0.744 | 0.830  | -0.125 | 0.955  |
| -1.249 | -0.862 | -0.196 | 0.181  | -0.377 |
| -0.644 | -0.262 | -0.578 | 0.037  | -0.615 |
| -3.017 | -2.108 | 0.056  | -0.517 | 0.572  |

|        |        |        |        |        |
|--------|--------|--------|--------|--------|
| -1.607 | -1.500 | 0.408  | 0.182  | 0.226  |
| 1.473  | 3.471  | 0.165  | 0.066  | 0.099  |
| -2.629 | -1.026 | 0.488  | 0.382  | 0.106  |
| -1.886 | -0.311 | 0.303  | -0.286 | 0.589  |
| -0.162 | -0.452 | 0.251  | 0.505  | -0.254 |
| -1.322 | -1.335 | -0.122 | 0.268  | -0.390 |
| 1.301  | 1.232  | 0.111  | 0.254  | -0.143 |
| -1.489 | -1.475 | 0.241  | -0.281 | 0.522  |
| -2.402 | -1.081 | -0.003 | -0.555 | 0.552  |
| 1.061  | 0.786  | 0.120  | 0.007  | 0.113  |
| 0.601  | -0.554 | -0.330 | -0.188 | -0.142 |
| -0.083 | -0.673 | 0.220  | 0.260  | -0.040 |
| 0.060  | -0.061 | -0.307 | -0.469 | 0.161  |
| -1.370 | -0.659 | -0.118 | -0.400 | 0.282  |
| -0.577 | 0.008  | 0.311  | -0.391 | 0.703  |
| -0.289 | -0.944 | 0.325  | 0.710  | -0.385 |
| -2.671 | -2.762 | -0.171 | 0.142  | -0.313 |
| 1.422  | 0.261  | 0.209  | 0.386  | -0.177 |
| 1.857  | 1.412  | 0.454  | 0.063  | 0.391  |
| -1.521 | -1.358 | 0.110  | -0.010 | 0.120  |
| -2.676 | -3.433 | 0.449  | 0.444  | 0.005  |
| -0.031 | 0.017  | 0.269  | 0.224  | 0.045  |
| 2.382  | 1.628  | -0.076 | 0.117  | -0.194 |
| 1.520  | 1.604  | -0.305 | -0.322 | 0.016  |
| -2.651 | -1.284 | -0.287 | -0.248 | -0.039 |
| 0.083  | -0.162 | -0.255 | -0.080 | -0.175 |
| 0.350  | 0.751  | 0.086  | -0.050 | 0.137  |
| 0.383  | 0.806  | -1.558 | -0.746 | -0.812 |
| 0.877  | 0.639  | 0.253  | -0.324 | 0.576  |
| 1.986  | 1.479  | 0.109  | 0.563  | -0.453 |
| 1.286  | 1.851  | 0.338  | 0.124  | 0.213  |
| 0.990  | 1.859  | -0.329 | -0.164 | -0.165 |
| 0.231  | 0.580  | 0.482  | 0.006  | 0.476  |
| -4.126 | -0.652 | -0.051 | 0.447  | -0.499 |
| -2.572 | -3.318 | -0.390 | -0.197 | -0.194 |
| 0.436  | 0.738  | 0.141  | 0.505  | -0.364 |
| -2.175 | -2.099 | 0.043  | -0.184 | 0.227  |
| -1.919 | -1.541 | 0.259  | -0.350 | 0.609  |
| -1.959 | -1.907 | 0.072  | -0.156 | 0.227  |
| -5.061 | -4.517 | 0.027  | -0.271 | 0.298  |
| -0.132 | -0.650 | 0.013  | 0.519  | -0.506 |
| -0.132 | -0.033 | -0.015 | -0.320 | 0.305  |
| 1.391  | 0.884  | 0.182  | -0.233 | 0.415  |
| -2.359 | -1.812 | -0.058 | 0.818  | -0.876 |
| -1.975 | -1.511 | 0.837  | 0.366  | 0.471  |
| 1.283  | 0.097  | 0.700  | -0.198 | 0.897  |
| 1.925  | 0.899  | 0.197  | 0.285  | -0.089 |
| 1.377  | 0.286  | -0.459 | 0.274  | -0.732 |
| 1.851  | 0.494  | 0.316  | 0.725  | -0.409 |
| 0.448  | 1.338  | 0.428  | -0.566 | 0.994  |
| 2.431  | 0.879  | -0.288 | -0.158 | -0.130 |

|        |        |        |        |        |
|--------|--------|--------|--------|--------|
| 1.171  | 0.886  | 0.478  | 0.163  | 0.315  |
| -2.132 | -1.610 | 0.263  | -0.127 | 0.390  |
| 2.349  | 1.879  | -0.435 | 0.050  | -0.484 |
| 1.881  | 1.083  | -0.563 | -0.317 | -0.246 |
| 2.176  | 0.930  | -0.520 | -0.234 | -0.286 |
| 1.374  | 0.465  | -0.076 | -0.238 | 0.162  |
| 2.465  | 2.739  | 0.749  | -1.203 | 1.952  |
| 1.620  | 1.320  | -0.388 | -1.030 | 0.642  |
| 0.862  | 1.056  | -0.015 | -0.464 | 0.449  |
| 0.740  | 1.039  | -1.063 | -0.328 | -0.735 |
| -2.687 | -1.937 | -0.218 | 0.300  | -0.518 |
| -1.413 | -1.398 | 0.272  | 0.190  | 0.082  |
| -0.890 | -1.517 | 0.039  | 0.201  | -0.162 |
| -1.917 | -1.318 | -0.832 | 0.503  | -1.335 |
| 0.463  | 0.532  | -0.272 | -0.124 | -0.148 |
| -1.166 | -0.764 | -0.664 | -0.540 | -0.124 |
| -0.417 | -0.444 | -0.254 | 0.217  | -0.471 |
| 3.220  | 2.174  | -0.702 | 0.273  | -0.976 |
| 0.399  | -0.978 | 0.134  | 0.098  | 0.036  |
| -1.994 | -1.448 | 0.125  | -0.559 | 0.684  |
| 1.376  | 0.478  | 0.388  | 0.101  | 0.287  |
| 0.822  | -0.015 | -0.766 | -0.287 | -0.479 |
| -2.246 | -2.155 | -0.627 | -0.479 | -0.148 |
| -1.573 | -1.226 | 0.357  | -0.796 | 1.152  |
| -0.791 | -0.640 | -0.456 | -0.607 | 0.151  |
| 0.466  | -0.612 | -0.068 | 0.012  | -0.080 |
| -2.945 | -2.027 | -0.399 | -0.635 | 0.236  |
| 3.358  | 2.464  | 0.976  | 0.768  | 0.208  |
| 2.261  | 1.670  | 0.432  | 0.199  | 0.233  |
| 1.085  | 0.961  | 0.481  | 0.279  | 0.201  |
| 0.321  | 0.705  | -0.132 | -0.766 | 0.634  |
| 1.021  | -0.292 | 0.205  | 0.373  | -0.168 |
| 0.614  | -0.313 | 0.085  | 0.584  | -0.499 |
| -1.000 | -1.378 | -0.753 | -0.073 | -0.681 |
| -0.031 | -0.456 | 0.073  | -0.044 | 0.117  |
| 0.416  | 0.060  | 0.188  | 0.290  | -0.102 |
| 0.315  | 0.157  | 0.504  | 0.213  | 0.291  |
| 0.008  | 0.301  | -0.756 | -0.799 | 0.043  |
| -1.246 | -0.788 | -0.090 | -0.558 | 0.469  |
| -3.750 | -3.164 | 0.008  | -0.336 | 0.344  |
| 0.375  | 0.798  | 0.477  | -0.343 | 0.820  |
| 2.746  | 1.488  | -0.820 | -0.295 | -0.525 |
| -3.118 | -2.325 | 0.223  | -0.059 | 0.282  |
| 1.475  | 1.154  | 0.241  | 0.787  | -0.546 |
| -2.441 | -1.825 | 0.136  | 0.538  | -0.401 |
| -1.113 | -0.969 | 0.225  | 0.428  | -0.203 |
| -0.232 | -0.011 | -0.539 | -0.197 | -0.342 |
| 2.504  | 2.357  | 0.621  | 0.755  | -0.134 |
| 1.882  | 0.805  | 0.849  | 0.358  | 0.491  |
| -0.237 | 0.138  | 0.442  | -0.454 | 0.896  |
| 2.732  | 2.571  | 0.468  | -0.243 | 0.711  |

|        |        |        |        |        |
|--------|--------|--------|--------|--------|
| -1.813 | -1.211 | -0.207 | 0.186  | -0.393 |
| -2.632 | -1.470 | -0.088 | -0.744 | 0.656  |
| -2.343 | -2.076 | -0.286 | -0.281 | -0.006 |
| 0.052  | 0.827  | -0.650 | -0.690 | 0.040  |
| 0.537  | 0.340  | -0.511 | -0.470 | -0.041 |
| -0.504 | -0.776 | -1.070 | -0.207 | -0.863 |
| -1.508 | -1.087 | 0.065  | 0.304  | -0.240 |
| -0.516 | -0.581 | 0.107  | 0.078  | 0.029  |
| 1.111  | 1.344  | 0.545  | 0.367  | 0.178  |
| 1.633  | 0.573  | 0.153  | 0.456  | -0.303 |
| -0.232 | 0.324  | -0.586 | -0.668 | 0.082  |
| 2.711  | 2.496  | 0.367  | -0.152 | 0.519  |
| 0.195  | 0.505  | 0.769  | -0.242 | 1.011  |
| 2.255  | 2.099  | 0.414  | 0.175  | 0.239  |
| 1.908  | 1.298  | 0.364  | -0.075 | 0.439  |
| -2.081 | -0.783 | -0.122 | -0.205 | 0.083  |
| -1.908 | -1.412 | 0.116  | -0.332 | 0.448  |
| -1.197 | -1.886 | -0.058 | -0.020 | -0.039 |
| 0.046  | -0.386 | -0.259 | -0.275 | 0.016  |
| -0.686 | -0.376 | 0.136  | -0.101 | 0.238  |
| -1.208 | -1.963 | -0.009 | 0.098  | -0.107 |
| -0.621 | -0.726 | 0.370  | -0.029 | 0.399  |
| -0.455 | -0.242 | 0.358  | -0.024 | 0.382  |
| -0.174 | -0.724 | 0.463  | -0.617 | 1.080  |
| 0.123  | -0.014 | 0.197  | 0.361  | -0.164 |
| -1.908 | -1.724 | 0.017  | 0.677  | -0.660 |
| -3.934 | -3.410 | 0.061  | -0.857 | 0.918  |
| -3.715 | -3.648 | 0.150  | 0.424  | -0.274 |
| -3.624 | -2.981 | 0.197  | -0.093 | 0.290  |
| -3.428 | -2.738 | -0.177 | -0.083 | -0.094 |
| 0.932  | 0.113  | -0.099 | 0.014  | -0.113 |
| 1.476  | 1.728  | 0.258  | -0.046 | 0.305  |
| 0.492  | 0.833  | 0.524  | 0.464  | 0.060  |
| -1.380 | -0.892 | -0.112 | -0.408 | 0.296  |
| -0.640 | -0.637 | -0.024 | -0.214 | 0.190  |
| -1.151 | -0.743 | -0.127 | -0.168 | 0.040  |
| -2.964 | -2.307 | -0.525 | -0.375 | -0.150 |
| -1.835 | -1.720 | 0.072  | -0.359 | 0.431  |
| -0.837 | -0.597 | 0.179  | -0.381 | 0.561  |
| 0.487  | 0.441  | -0.024 | -0.182 | 0.158  |
| 2.210  | 2.010  | 0.998  | 0.264  | 0.733  |
| 2.756  | 2.378  | 0.495  | 0.411  | 0.084  |
| -0.985 | -0.789 | 0.394  | 0.064  | 0.331  |
| 0.900  | -0.175 | -0.049 | 0.472  | -0.521 |
| -1.115 | -1.151 | -0.100 | 0.841  | -0.941 |
| -2.061 | -1.032 | -0.185 | -0.810 | 0.625  |
| -0.770 | -0.623 | -0.275 | -0.351 | 0.076  |
| 0.514  | -0.552 | 0.002  | 0.199  | -0.197 |
| 0.451  | -0.491 | 0.358  | 0.361  | -0.003 |
| 1.135  | 0.241  | -0.193 | 0.086  | -0.280 |
| 0.171  | 0.397  | 0.080  | -0.164 | 0.245  |



|        |        |        |        |        |
|--------|--------|--------|--------|--------|
| 0.131  | 0.471  | 0.409  | 0.109  | 0.299  |
| -2.581 | -3.425 | -0.276 | -0.225 | -0.050 |
| 0.202  | 0.613  | -0.038 | -0.254 | 0.216  |
| 0.027  | 0.138  | 0.207  | -0.172 | 0.379  |
| 0.752  | -0.378 | -0.121 | -0.478 | 0.357  |
| -0.369 | -0.114 | -0.193 | -0.015 | -0.177 |
| -0.244 | -0.131 | 0.539  | 0.552  | -0.013 |
| -1.886 | -1.411 | -0.323 | 1.117  | -1.440 |
| -1.494 | -1.307 | -0.169 | -0.386 | 0.217  |
| -0.492 | 0.102  | -0.693 | -0.447 | -0.245 |
| 0.683  | 0.493  | 0.605  | 0.095  | 0.510  |
| -1.833 | -1.459 | 0.552  | -0.175 | 0.727  |
| -0.560 | -0.282 | -0.693 | 0.072  | -0.766 |
| 1.045  | 1.548  | 0.221  | -0.278 | 0.499  |
| 1.430  | 2.427  | 0.293  | -0.073 | 0.366  |
| -0.649 | -0.637 | 0.360  | 0.819  | -0.459 |
| 1.466  | 1.609  | -0.066 | -0.003 | -0.064 |
| 1.026  | 0.125  | -0.109 | 0.391  | -0.500 |
| 1.673  | 1.804  | -0.047 | 0.014  | -0.061 |
| -1.464 | -1.020 | -0.340 | -0.606 | 0.266  |
| 0.026  | 0.408  | 0.453  | 0.071  | 0.382  |
| 2.421  | 1.276  | -0.106 | 0.115  | -0.221 |
| -0.036 | -0.498 | -0.084 | 0.532  | -0.616 |
| 0.513  | 0.889  | -0.547 | -0.082 | -0.465 |
| 1.489  | 2.138  | -0.094 | -0.180 | 0.086  |
| 1.014  | 0.813  | 0.401  | 0.958  | -0.557 |
| 0.086  | 0.436  | 0.098  | -0.195 | 0.294  |
| -0.650 | -1.977 | -0.032 | 0.174  | -0.206 |
| 0.560  | 0.228  | -0.623 | -0.753 | 0.129  |
| 0.270  | 0.450  | 0.558  | 0.425  | 0.133  |
| -2.218 | -1.811 | 0.031  | -0.765 | 0.796  |
| 1.105  | 0.231  | 0.659  | 0.684  | -0.024 |
| 0.757  | 0.454  | 0.462  | 0.153  | 0.309  |
| 0.795  | 0.846  | 0.127  | 0.140  | -0.013 |
| 1.655  | 0.534  | -1.051 | -0.568 | -0.483 |
| 0.057  | 0.595  | 0.294  | -0.668 | 0.963  |
| -2.564 | 0.747  | -0.730 | -1.807 | 1.077  |
| 0.314  | 0.762  | 0.262  | -0.341 | 0.603  |
| 0.944  | 1.498  | 0.314  | 0.353  | -0.039 |
| 2.442  | 1.668  | -0.677 | -0.028 | -0.649 |
| -1.595 | -1.092 | 0.117  | -0.578 | 0.695  |
| 2.027  | 1.240  | 0.205  | 0.001  | 0.204  |
| 2.150  | 1.475  | -0.375 | 0.038  | -0.413 |
| -2.767 | -2.161 | -0.321 | -1.177 | 0.856  |
| 0.025  | 0.663  | 0.256  | -0.157 | 0.413  |
| -0.082 | -0.564 | 0.576  | 0.273  | 0.302  |
| 0.477  | -0.819 | 0.761  | 0.454  | 0.307  |
| -2.083 | -1.702 | 0.825  | 0.063  | 0.763  |
| 0.661  | 1.099  | 0.451  | 0.374  | 0.078  |
| -0.407 | 0.485  | -0.032 | -0.109 | 0.077  |
| 0.145  | -1.160 | 0.287  | -0.132 | 0.419  |

|        |        |        |        |        |
|--------|--------|--------|--------|--------|
| -0.002 | 0.109  | 0.131  | 0.315  | -0.185 |
| -0.565 | -0.433 | 0.095  | 0.092  | 0.003  |
| 1.416  | 1.675  | 0.205  | -0.072 | 0.277  |
| 2.041  | 1.229  | 0.284  | 0.181  | 0.103  |
| 1.164  | 0.479  | 0.043  | -0.155 | 0.198  |
| -1.375 | -1.136 | 0.140  | -0.047 | 0.187  |
| 0.753  | 1.050  | 0.312  | -0.450 | 0.762  |
| -2.489 | -2.368 | 0.552  | 0.208  | 0.345  |
| -0.052 | -0.908 | -0.164 | 0.119  | -0.283 |
| -0.314 | 0.342  | 0.162  | -0.478 | 0.639  |
| -1.079 | -0.618 | -0.093 | -0.479 | 0.387  |
| -1.099 | -0.120 | -0.662 | -0.284 | -0.378 |
| 0.299  | 0.369  | 0.205  | -0.508 | 0.713  |
| 2.287  | 0.960  | 0.250  | 0.108  | 0.142  |
| -0.331 | -0.834 | 0.301  | 0.002  | 0.300  |
| 1.912  | 1.884  | 0.621  | 0.277  | 0.344  |
| -0.989 | -1.055 | -0.522 | 0.163  | -0.685 |
| 0.931  | 0.667  | 0.092  | 0.780  | -0.688 |
| -1.545 | -1.659 | -0.245 | -0.834 | 0.589  |
| -0.744 | -1.918 | -0.103 | 0.194  | -0.297 |
| 1.278  | 0.913  | 0.227  | -0.404 | 0.630  |
| 2.213  | 1.916  | -0.079 | -0.204 | 0.126  |
| 0.527  | -0.612 | -0.220 | 0.139  | -0.359 |
| -0.989 | -0.657 | 0.079  | 0.398  | -0.319 |
| -2.343 | -2.030 | 0.191  | 0.296  | -0.105 |
| -1.688 | -0.950 | 0.609  | 0.120  | 0.488  |
| -0.249 | 0.170  | 0.352  | 0.049  | 0.303  |
| -2.127 | -1.962 | -0.474 | -0.033 | -0.441 |
| -1.447 | -1.333 | -0.111 | 0.163  | -0.274 |
| 1.503  | 1.137  | 0.098  | -0.543 | 0.641  |
| 1.719  | 1.410  | -0.791 | -0.208 | -0.583 |
| -0.991 | -1.409 | 0.091  | -0.302 | 0.393  |
| -0.502 | -0.772 | 0.077  | 0.189  | -0.111 |
| -2.582 | -2.174 | -2.587 | -0.322 | -2.265 |
| 1.741  | 0.154  | 0.287  | 0.699  | -0.412 |
| 1.112  | 1.192  | -0.232 | -0.303 | 0.071  |
| -0.038 | -0.918 | 0.208  | 0.259  | -0.052 |
| 2.464  | 1.084  | 0.358  | 0.192  | 0.166  |
| 1.576  | 0.835  | 0.468  | 0.121  | 0.348  |
| 0.543  | 1.001  | 0.318  | -0.115 | 0.433  |
| -1.127 | -0.389 | -0.537 | -0.718 | 0.181  |
| 0.220  | -0.283 | -0.487 | 0.183  | -0.670 |
| 2.935  | 2.080  | 0.095  | 0.446  | -0.351 |
| 1.618  | 0.783  | 0.249  | 0.369  | -0.120 |
| -0.146 | 0.231  | 0.393  | 0.078  | 0.315  |
| -1.250 | -0.918 | -0.411 | -0.589 | 0.178  |
| -0.782 | -0.686 | 0.227  | -0.150 | 0.376  |
| 0.206  | 0.796  | -0.872 | -1.229 | 0.357  |
| -3.210 | -2.562 | -0.279 | -0.452 | 0.173  |
| -2.757 | -1.298 | -0.142 | 1.328  | -1.470 |
| -0.009 | 0.414  | -0.441 | 1.870  | -2.311 |

|        |        |        |        |        |
|--------|--------|--------|--------|--------|
| -1.523 | -1.207 | 0.107  | -0.121 | 0.228  |
| -0.364 | -0.313 | -0.390 | -0.198 | -0.192 |
| 1.819  | 2.291  | 0.586  | 0.135  | 0.451  |
| 1.082  | 1.166  | 0.007  | -0.143 | 0.150  |
| 0.785  | 0.408  | -0.127 | 0.580  | -0.707 |
| 1.380  | 1.012  | -0.058 | -0.179 | 0.121  |
| 1.432  | 2.145  | -0.293 | -0.494 | 0.201  |
| -2.611 | -2.260 | -0.253 | -0.106 | -0.147 |
| 1.060  | 1.105  | 0.301  | -0.288 | 0.589  |
| -1.499 | -1.417 | -0.166 | -0.367 | 0.201  |
| -1.814 | -1.464 | 0.515  | 0.162  | 0.354  |
| -2.309 | -2.571 | -0.451 | -0.362 | -0.089 |
| -1.184 | -0.887 | 0.100  | -0.500 | 0.600  |
| -1.424 | -0.598 | 0.842  | -0.113 | 0.955  |
| 0.027  | 0.257  | -0.274 | 0.135  | -0.409 |
| 1.198  | 2.020  | 0.165  | -0.841 | 1.006  |
| 0.664  | 1.195  | 0.491  | 0.391  | 0.101  |
| -0.209 | -1.533 | -0.011 | 0.177  | -0.188 |
| 0.445  | 0.727  | 0.365  | 0.180  | 0.186  |
| 0.943  | 0.252  | 0.677  | 0.223  | 0.454  |
| -0.995 | -0.452 | -0.934 | -1.052 | 0.117  |
| -2.191 | -1.857 | 0.449  | -0.783 | 1.232  |
| -1.638 | -1.091 | -0.228 | -0.728 | 0.500  |
| -1.876 | -1.148 | 0.125  | -0.570 | 0.695  |
| 0.604  | -0.660 | 0.359  | 0.328  | 0.030  |
| -1.288 | -0.724 | 0.332  | -0.525 | 0.856  |
| 0.513  | 0.116  | -0.009 | -0.378 | 0.369  |
| 1.899  | 1.281  | -0.006 | 0.502  | -0.508 |
| -1.829 | -0.948 | -0.096 | -0.580 | 0.484  |
| 1.594  | 1.316  | 0.303  | 0.156  | 0.147  |
| 0.837  | 0.322  | -0.641 | -0.193 | -0.449 |
| 1.733  | 1.839  | 0.173  | -0.125 | 0.298  |
| -1.397 | -0.629 | -0.104 | -0.151 | 0.047  |
| 0.383  | -0.826 | -0.231 | 0.066  | -0.297 |
| -1.057 | -0.435 | 0.576  | -0.439 | 1.015  |
| 0.228  | -0.222 | 0.325  | 0.237  | 0.087  |
| 1.227  | 1.721  | -0.292 | -0.092 | -0.201 |
| 2.132  | 2.092  | -1.218 | -0.853 | -0.365 |
| 0.014  | 0.750  | -0.037 | -0.478 | 0.441  |
| -2.352 | -1.227 | -0.364 | -0.153 | -0.211 |
| -0.785 | -0.531 | 0.012  | -0.351 | 0.363  |
| 0.526  | -0.228 | -0.163 | 0.134  | -0.297 |
| -0.941 | 0.000  | -0.226 | -0.215 | -0.011 |
| 0.628  | 1.304  | -0.184 | 0.106  | -0.290 |
| 0.509  | 0.373  | -0.048 | -0.419 | 0.370  |
| 2.746  | 1.836  | 0.308  | -0.039 | 0.347  |
| 0.952  | 0.726  | -0.132 | -0.231 | 0.099  |
| -1.281 | -0.862 | 0.196  | -0.359 | 0.555  |
| -1.833 | -1.278 | -0.348 | -0.552 | 0.204  |
| 0.664  | 1.147  | -0.356 | -0.542 | 0.186  |
| -0.751 | -1.525 | -0.146 | -0.006 | -0.140 |

|        |        |        |        |        |
|--------|--------|--------|--------|--------|
| -0.098 | 1.363  | 0.124  | 0.661  | -0.538 |
| -0.602 | -0.368 | 0.299  | 0.261  | 0.038  |
| 1.160  | 0.325  | -0.310 | -0.584 | 0.274  |
| -2.007 | -2.374 | -0.088 | 0.017  | -0.105 |
| -0.003 | -0.590 | 0.084  | 0.379  | -0.295 |
| 0.727  | 0.876  | -0.120 | -0.154 | 0.035  |
| 0.621  | -0.121 | -0.693 | -0.511 | -0.182 |
| 3.723  | 2.750  | 0.557  | 0.284  | 0.273  |
| 1.122  | 2.007  | 0.153  | -0.120 | 0.273  |
| 1.652  | 1.562  | -0.308 | 0.078  | -0.387 |
| -0.044 | 0.097  | 0.207  | 0.166  | 0.041  |
| -0.071 | 0.498  | 0.000  | -0.927 | 0.927  |
| -1.640 | -1.245 | 0.247  | -0.482 | 0.729  |
| 0.262  | 1.022  | 0.282  | -0.464 | 0.747  |
| 1.473  | 1.638  | 0.531  | 0.384  | 0.147  |
| -2.640 | -2.704 | -0.224 | -0.394 | 0.170  |
| -1.248 | -0.958 | -0.334 | -0.402 | 0.068  |
| -2.019 | -1.311 | 0.177  | -0.005 | 0.182  |
| -1.149 | -1.310 | -0.148 | -0.405 | 0.257  |
| 1.988  | 1.177  | 0.255  | -0.104 | 0.359  |
| -0.867 | -0.669 | 0.316  | -0.311 | 0.627  |
| 2.035  | 1.207  | 0.504  | 0.587  | -0.083 |
| -0.392 | -0.234 | -0.341 | -0.307 | -0.034 |
| 0.556  | 1.024  | 0.269  | 0.462  | -0.193 |
| 0.346  | -0.509 | -0.364 | 0.552  | -0.916 |
| -1.356 | -0.519 | -0.624 | -0.485 | -0.138 |
| -3.573 | -2.926 | -0.646 | -0.756 | 0.109  |
| -0.457 | -1.131 | 0.180  | -0.105 | 0.285  |
| -0.331 | -1.024 | 0.238  | 0.238  | 0.000  |
| 0.129  | -0.680 | -1.366 | -0.362 | -1.004 |
| -1.023 | -1.220 | 0.406  | -0.365 | 0.771  |
| -2.479 | -1.840 | -0.221 | -0.001 | -0.220 |
| 0.730  | 1.073  | 0.556  | -0.010 | 0.566  |
| 0.122  | 0.942  | 0.112  | -0.253 | 0.365  |
| -0.077 | 0.118  | 0.482  | 0.332  | 0.149  |
| 0.095  | 0.504  | 0.092  | 0.215  | -0.123 |
| 0.397  | 1.023  | -0.185 | -0.397 | 0.212  |
| 0.916  | -1.006 | 0.228  | 0.190  | 0.038  |
| 2.334  | 1.747  | 0.407  | -0.216 | 0.623  |
| 0.000  | 0.104  | -0.316 | -0.294 | -0.022 |
| -2.770 | -2.435 | 0.136  | -0.546 | 0.682  |
| -1.428 | -1.056 | 0.383  | -0.923 | 1.306  |
| 1.174  | 1.541  | -0.101 | -0.604 | 0.503  |
| -3.052 | -2.853 | -0.518 | -0.576 | 0.057  |
| 0.302  | 1.117  | 0.179  | -0.063 | 0.242  |
| -0.795 | -1.156 | 0.152  | -0.044 | 0.197  |
| 0.119  | -0.677 | 0.373  | 0.241  | 0.132  |
| 1.276  | 0.899  | 0.334  | 0.332  | 0.002  |
| -0.608 | -0.362 | 0.488  | 0.734  | -0.246 |
| 0.236  | 0.531  | -0.997 | -0.101 | -0.896 |
| -2.596 | -1.870 | 0.034  | -0.479 | 0.513  |

|        |        |        |        |        |
|--------|--------|--------|--------|--------|
| -2.060 | -1.632 | 0.275  | 0.567  | -0.292 |
| -1.839 | -1.173 | -0.346 | -0.858 | 0.512  |
| -2.124 | -1.709 | 0.606  | -0.162 | 0.768  |
| 1.611  | 1.979  | 0.269  | 0.010  | 0.259  |
| -4.287 | -2.659 | 0.372  | 0.797  | -0.426 |
| -1.986 | -1.907 | 0.134  | -0.257 | 0.391  |
| -0.202 | -0.060 | 0.214  | -0.116 | 0.330  |
| -1.419 | -0.467 | -1.152 | -1.089 | -0.063 |
| -0.220 | -0.027 | 0.639  | 0.286  | 0.352  |
| -2.457 | -2.235 | -0.086 | -0.397 | 0.311  |
| -1.200 | -0.735 | -0.105 | -0.187 | 0.082  |
| -0.052 | -0.707 | 0.607  | 0.307  | 0.300  |
| -2.016 | -2.049 | -0.098 | -0.456 | 0.358  |
| -1.554 | -2.217 | 0.230  | 1.177  | -0.947 |
| 1.584  | 1.752  | -0.275 | 0.024  | -0.298 |
| 0.714  | 0.818  | 0.161  | -0.331 | 0.492  |
| 0.071  | -0.916 | 0.505  | 0.014  | 0.491  |
| -0.755 | -1.316 | 0.393  | 0.463  | -0.070 |
| 1.115  | 1.597  | -1.072 | -0.033 | -1.039 |
| 0.666  | 1.201  | -0.366 | -0.645 | 0.279  |
| 1.537  | 0.998  | -0.208 | 0.109  | -0.317 |
| 0.313  | 0.745  | 0.704  | -0.046 | 0.750  |
| 2.713  | 2.365  | 0.034  | 0.091  | -0.057 |
| 2.043  | 0.928  | 0.390  | 0.332  | 0.058  |
| 2.109  | 2.255  | 0.351  | 0.055  | 0.296  |
| 0.630  | 0.118  | 0.254  | 0.584  | -0.330 |
| -0.569 | -0.681 | 0.281  | -0.020 | 0.301  |
| -2.118 | -2.488 | 0.104  | -0.463 | 0.567  |
| -1.535 | -1.000 | -0.279 | -0.155 | -0.124 |
| -2.492 | -1.401 | -0.060 | -0.024 | -0.035 |
| 1.344  | 1.034  | 0.699  | 0.614  | 0.084  |
| -0.889 | -0.443 | -0.070 | -0.992 | 0.922  |
| 0.204  | 0.467  | 0.190  | -0.138 | 0.328  |
| -1.088 | -0.819 | 0.276  | 0.204  | 0.072  |
| 0.006  | 0.264  | -0.029 | 0.388  | -0.418 |
| -1.484 | -1.879 | -0.119 | 0.422  | -0.542 |
| -0.496 | -0.294 | -0.020 | 0.045  | -0.066 |
| -2.472 | -2.190 | -0.317 | -0.165 | -0.152 |
| 0.088  | 0.174  | 0.081  | 0.489  | -0.408 |
| 1.719  | 1.414  | 0.094  | -0.074 | 0.168  |
| 0.590  | 0.502  | -0.129 | 0.289  | -0.417 |
| 0.533  | -0.091 | 0.174  | -0.137 | 0.311  |
| 0.034  | -1.036 | 0.276  | 0.211  | 0.065  |
| 0.317  | 0.557  | 0.140  | -0.046 | 0.186  |
| -1.532 | -1.040 | -0.183 | -0.605 | 0.421  |
| 0.591  | 0.157  | 0.335  | 0.348  | -0.014 |
| 0.712  | 0.960  | 0.088  | 0.627  | -0.539 |
| 2.539  | 2.088  | 0.100  | 0.161  | -0.060 |
| -0.576 | -0.368 | 0.333  | -0.107 | 0.441  |
| 0.506  | 0.786  | 0.195  | -0.437 | 0.633  |
| 0.014  | 0.090  | 0.361  | -0.084 | 0.445  |

|        |        |        |        |        |
|--------|--------|--------|--------|--------|
| -1.200 | 0.150  | -0.049 | 0.483  | -0.532 |
| 0.487  | 0.004  | 0.200  | 0.334  | -0.134 |
| -2.187 | -2.071 | -0.525 | -0.673 | 0.148  |
| 1.320  | 1.240  | 0.321  | 0.111  | 0.211  |
| -1.940 | -1.482 | -0.205 | -0.199 | -0.006 |
| -3.702 | -3.147 | -0.175 | -0.618 | 0.444  |
| -2.705 | -2.485 | 0.415  | -0.236 | 0.651  |
| -2.096 | -1.881 | 0.195  | -0.422 | 0.617  |
| -3.002 | -2.122 | 0.012  | -1.148 | 1.161  |
| -2.662 | -2.023 | -0.469 | 0.030  | -0.499 |
| -1.660 | -1.222 | -0.600 | -0.174 | -0.426 |
| -0.891 | -0.703 | -0.083 | 0.022  | -0.106 |
| -4.033 | -3.895 | -0.089 | -0.379 | 0.290  |
| -2.778 | -1.986 | -0.126 | -1.197 | 1.071  |
| 0.587  | 0.246  | 0.180  | 0.200  | -0.019 |
| 1.903  | 1.068  | 0.477  | 0.738  | -0.261 |
| -1.487 | -1.244 | -0.133 | -0.090 | -0.043 |
| -0.364 | -0.156 | 0.117  | -0.127 | 0.244  |
| 1.348  | 1.400  | -0.255 | -0.306 | 0.051  |
| -0.500 | -0.998 | -0.208 | -0.501 | 0.294  |
| -1.900 | -2.534 | -0.155 | 0.586  | -0.741 |
| -0.949 | -0.711 | 0.168  | -0.320 | 0.488  |
| 1.523  | 2.033  | 0.804  | 0.330  | 0.474  |
| -2.932 | -2.511 | -0.157 | -0.001 | -0.156 |
| -0.385 | 0.137  | 0.199  | 0.929  | -0.730 |
| -0.550 | -0.528 | 0.414  | -0.237 | 0.650  |
| -2.697 | -2.398 | 0.532  | -0.433 | 0.965  |
| -0.707 | -0.298 | 0.096  | -0.058 | 0.154  |
| -0.635 | -0.151 | 0.201  | -0.006 | 0.207  |
| -0.256 | -0.469 | -0.478 | -0.022 | -0.456 |
| 0.435  | 0.046  | 0.726  | 0.735  | -0.009 |
| -0.628 | -0.141 | -0.679 | -0.223 | -0.457 |
| -0.031 | 0.272  | 0.305  | -0.581 | 0.886  |
| 0.553  | 1.169  | 0.333  | -0.825 | 1.158  |
| -0.315 | -0.224 | -0.219 | -0.248 | 0.030  |
| -1.687 | -1.191 | -0.456 | -0.480 | 0.024  |
| -1.698 | -1.513 | -0.032 | -0.261 | 0.229  |
| -0.208 | -1.047 | 0.181  | 0.164  | 0.016  |
| 2.506  | 3.169  | 0.088  | -0.247 | 0.336  |
| -2.166 | -2.355 | 0.071  | 0.591  | -0.521 |
| -1.759 | -2.121 | 0.317  | -0.124 | 0.441  |
| -0.180 | -0.222 | -1.345 | -0.769 | -0.577 |
| 1.247  | 0.437  | 0.000  | 0.013  | -0.013 |
| -2.127 | -0.969 | -0.175 | -0.333 | 0.158  |
| 0.610  | 0.730  | -0.508 | -0.515 | 0.008  |
| 2.478  | 1.843  | -0.115 | -0.267 | 0.152  |
| 1.711  | 1.326  | 0.525  | 0.041  | 0.484  |
| 0.373  | 0.856  | 0.434  | -0.062 | 0.496  |
| 0.235  | 0.545  | 0.102  | -0.311 | 0.412  |
| 1.772  | 1.378  | -0.461 | -0.295 | -0.166 |
| 1.233  | 1.221  | -0.452 | -0.121 | -0.331 |

|        |        |        |        |        |
|--------|--------|--------|--------|--------|
| -0.266 | -1.618 | 0.354  | 0.555  | -0.201 |
| -0.101 | 0.211  | 0.453  | -0.423 | 0.876  |
| -1.023 | -0.706 | 0.338  | -0.222 | 0.560  |
| -4.436 | -1.602 | -0.096 | -1.515 | 1.419  |
| 0.487  | -0.220 | 0.463  | 0.132  | 0.331  |
| -0.334 | 0.169  | -0.097 | -0.494 | 0.397  |
| -0.308 | -0.797 | -0.849 | -0.454 | -0.394 |
| -1.279 | -1.787 | 0.143  | -0.072 | 0.215  |
| -2.370 | -2.319 | -0.360 | 1.298  | -1.659 |
| -1.615 | -1.077 | -0.077 | -0.078 | 0.001  |
| -2.963 | -2.255 | -0.328 | -0.240 | -0.089 |
| -3.558 | -3.089 | 0.316  | 0.176  | 0.140  |
| -1.546 | -1.276 | 0.328  | -0.297 | 0.625  |
| 0.825  | 1.386  | 0.145  | -0.262 | 0.407  |
| -2.249 | -1.501 | 0.214  | 1.356  | -1.142 |
| -3.322 | -2.944 | 0.145  | -0.198 | 0.343  |
| -1.799 | -1.771 | -0.510 | -0.452 | -0.058 |
| 0.806  | 1.445  | 0.178  | 0.120  | 0.058  |
| -1.341 | -1.369 | 0.316  | 0.039  | 0.277  |
| -2.612 | -2.482 | -0.044 | 0.224  | -0.268 |
| 0.158  | 0.214  | -0.051 | 0.408  | -0.459 |
| 0.820  | -0.737 | -0.533 | 0.404  | -0.938 |
| 0.562  | 1.103  | -0.073 | 0.762  | -0.835 |
| 1.451  | 0.826  | 0.179  | 0.181  | -0.002 |
| 2.412  | 2.082  | 0.229  | 0.167  | 0.063  |
| 2.185  | 1.773  | 0.191  | 0.216  | -0.025 |
| -0.886 | -0.798 | -0.278 | -0.312 | 0.035  |
| -1.218 | 0.000  | 0.487  | -0.210 | 0.698  |
| 0.297  | 0.176  | 0.232  | 0.255  | -0.023 |
| 1.102  | -0.245 | -0.103 | -0.434 | 0.331  |
| 1.903  | 1.077  | -0.323 | 0.376  | -0.699 |
| -0.554 | -0.417 | 0.275  | -0.443 | 0.718  |
| -3.298 | -2.861 | -0.885 | -0.115 | -0.770 |
| -1.889 | -1.671 | -0.315 | -0.377 | 0.062  |
| -1.695 | -1.342 | -0.314 | -1.078 | 0.764  |
| -0.280 | -1.473 | 0.357  | -0.267 | 0.624  |
| -0.518 | -0.636 | -0.108 | -0.206 | 0.098  |
| 0.817  | 0.843  | -0.096 | -0.198 | 0.102  |
| -2.684 | -2.094 | 0.203  | 0.038  | 0.165  |
| -0.700 | -1.261 | -0.167 | 0.592  | -0.759 |
| -0.070 | -0.315 | 0.272  | 0.290  | -0.018 |
| -1.392 | -0.676 | -1.164 | -1.013 | -0.150 |
| 0.386  | 0.622  | 0.280  | -0.267 | 0.546  |
| -2.362 | -1.403 | -0.078 | -1.118 | 1.041  |
| -2.799 | -2.201 | 0.652  | 0.147  | 0.505  |
| -0.815 | 0.016  | 0.022  | -0.085 | 0.107  |
| 3.037  | 2.079  | -0.223 | -0.697 | 0.474  |
| -0.118 | 0.333  | 0.985  | -0.196 | 1.181  |
| 0.237  | 0.794  | 0.184  | -0.028 | 0.212  |
| -1.739 | -2.300 | -0.684 | -0.318 | -0.366 |
| 0.006  | -0.420 | 0.392  | -0.040 | 0.432  |

|        |        |        |        |        |
|--------|--------|--------|--------|--------|
| 1.550  | 1.932  | -0.258 | 0.074  | -0.332 |
| -1.841 | -1.062 | -0.349 | -1.342 | 0.993  |
| -0.614 | -0.179 | 0.186  | -0.671 | 0.858  |
| 2.485  | 1.993  | 0.704  | 0.204  | 0.500  |
| 2.634  | 2.094  | -0.507 | -0.492 | -0.014 |
| -0.475 | -0.163 | 0.562  | -0.139 | 0.702  |
| -2.783 | -2.189 | -0.131 | -0.570 | 0.439  |
| 0.281  | 0.102  | 0.269  | 0.108  | 0.162  |
| -0.221 | 0.416  | 0.118  | -0.332 | 0.451  |
| 0.566  | 0.156  | 0.545  | 0.066  | 0.479  |
| 0.018  | -0.195 | 0.175  | 0.057  | 0.118  |
| -2.226 | -2.052 | 0.055  | -0.209 | 0.264  |
| 0.786  | -0.018 | -0.085 | 0.225  | -0.310 |
| -1.325 | -0.624 | 0.511  | 0.038  | 0.473  |
| -0.111 | -0.552 | 0.007  | -0.372 | 0.379  |
| 1.204  | 1.830  | 0.066  | -0.353 | 0.419  |
| -0.171 | 0.088  | 0.073  | -0.413 | 0.486  |
| -0.859 | -1.419 | 0.214  | -0.282 | 0.496  |
| -2.958 | -2.420 | -0.311 | -0.366 | 0.055  |
| 0.169  | -0.600 | 0.231  | 0.176  | 0.055  |
| -0.946 | -0.474 | 0.682  | -0.224 | 0.907  |
| -0.634 | -1.376 | 0.149  | 0.107  | 0.042  |
| -1.494 | -0.601 | -0.246 | 0.039  | -0.285 |
| 0.117  | -0.367 | 0.032  | 0.741  | -0.709 |
| 0.645  | -0.285 | 0.175  | 0.451  | -0.276 |
| -0.054 | 0.097  | 0.190  | 0.027  | 0.163  |
| -0.310 | -0.725 | 0.088  | -0.033 | 0.121  |
| -1.402 | -0.734 | -0.580 | -0.198 | -0.383 |
| -1.044 | -0.587 | 0.055  | -0.581 | 0.636  |
| 3.205  | 2.153  | 0.714  | 0.359  | 0.355  |
| 1.335  | 1.001  | 0.088  | -0.680 | 0.768  |
| 0.998  | -0.344 | 0.099  | 1.288  | -1.189 |
| -1.597 | -1.110 | 0.008  | -0.248 | 0.256  |
| -1.077 | -0.518 | -0.039 | -0.078 | 0.039  |
| -1.524 | -0.526 | -0.577 | -0.131 | -0.446 |
| -0.220 | 0.008  | 0.089  | -0.336 | 0.425  |
| 0.688  | -0.683 | 0.056  | 0.150  | -0.094 |
| 1.206  | 2.102  | -0.338 | -0.032 | -0.306 |
| -2.271 | -2.486 | -0.451 | 0.150  | -0.601 |
| 1.638  | 0.066  | -0.902 | -0.809 | -0.093 |
| -0.069 | -0.206 | 0.417  | -0.202 | 0.619  |
| -2.983 | -2.358 | 0.129  | -0.490 | 0.619  |
| 0.242  | 1.236  | 0.280  | -0.698 | 0.978  |
| 0.711  | 0.918  | 0.500  | -0.103 | 0.603  |
| -0.842 | -1.177 | 0.172  | -0.485 | 0.658  |
| -0.318 | 0.098  | 0.117  | -0.214 | 0.331  |
| -2.766 | -0.617 | 0.054  | -1.038 | 1.092  |
| 0.427  | 0.820  | 0.932  | 0.757  | 0.174  |
| -1.049 | -1.266 | -0.341 | 0.124  | -0.466 |
| 1.163  | 1.469  | -0.039 | -0.023 | -0.016 |
| -0.696 | -0.820 | 0.149  | 0.311  | -0.163 |



|        |        |        |        |        |
|--------|--------|--------|--------|--------|
| 0.898  | 0.194  | 0.215  | 0.283  | -0.068 |
| 0.818  | 1.021  | -0.139 | 0.020  | -0.159 |
| 1.145  | 1.107  | 0.175  | 0.158  | 0.017  |
| 2.002  | 1.829  | 0.720  | 0.234  | 0.486  |
| -2.518 | -2.282 | -0.176 | -0.207 | 0.030  |
| -3.099 | -2.563 | -0.321 | -0.375 | 0.055  |
| -1.574 | -2.197 | 0.333  | 0.317  | 0.016  |
| -1.785 | -1.628 | -0.154 | -0.479 | 0.325  |
| -3.898 | -3.218 | 0.118  | -0.201 | 0.320  |
| -2.811 | -2.375 | -0.295 | 0.353  | -0.649 |
| -1.684 | -1.348 | 0.120  | -0.164 | 0.284  |
| -2.436 | -2.059 | -1.099 | -0.275 | -0.824 |
| 0.017  | 1.039  | 0.276  | 0.140  | 0.136  |
| 0.796  | -0.599 | -0.162 | 0.287  | -0.449 |
| 0.042  | 0.438  | -0.660 | -0.423 | -0.237 |
| 0.951  | 0.991  | -1.814 | -0.940 | -0.874 |
| -0.952 | -0.334 | 0.246  | -0.369 | 0.615  |
| 1.357  | 1.524  | -0.012 | -0.674 | 0.662  |
| -1.676 | -2.006 | -0.122 | 0.119  | -0.241 |
| -1.582 | -2.032 | -0.058 | -0.149 | 0.091  |
| 0.673  | -0.377 | 0.139  | 0.222  | -0.083 |
| 0.868  | -0.266 | 0.121  | -0.204 | 0.325  |
| -0.275 | -0.444 | -0.289 | -0.221 | -0.067 |
| 0.774  | -0.332 | 0.100  | 0.212  | -0.112 |
| -2.807 | -0.532 | -0.669 | -0.878 | 0.209  |
| 0.101  | -0.659 | -0.005 | 0.259  | -0.264 |
| -2.576 | -2.304 | -0.138 | -0.218 | 0.079  |
| 0.349  | 0.197  | 0.428  | -0.168 | 0.595  |
| -0.752 | -0.991 | -0.242 | -0.014 | -0.228 |
| -0.565 | 0.046  | -0.450 | -0.272 | -0.178 |
| 1.136  | -0.057 | -1.219 | -0.230 | -0.989 |
| -1.149 | -1.530 | 0.406  | 0.029  | 0.377  |
| 0.308  | 0.331  | -0.367 | -0.179 | -0.187 |
| -0.620 | 0.322  | 0.278  | -0.252 | 0.530  |
| -3.216 | -2.737 | -0.605 | -1.278 | 0.674  |
| -0.007 | -1.022 | 0.102  | 0.606  | -0.504 |
| -2.844 | -1.674 | -0.164 | -0.105 | -0.059 |
| -0.383 | 0.604  | 0.159  | -0.202 | 0.362  |
| -0.842 | 0.260  | 0.703  | -0.183 | 0.886  |
| 2.006  | 0.616  | -0.156 | 0.112  | -0.268 |
| 1.185  | 0.571  | 0.023  | 0.670  | -0.647 |
| -1.923 | -2.330 | -0.225 | -0.494 | 0.268  |
| 1.009  | 0.941  | -0.508 | -0.266 | -0.242 |
| -2.251 | -1.872 | -0.203 | -0.126 | -0.077 |
| 2.343  | 2.153  | 0.465  | 0.221  | 0.243  |
| -0.991 | -0.803 | 0.047  | -0.261 | 0.309  |
| -0.247 | -1.152 | -0.236 | -0.285 | 0.049  |
| -0.807 | -1.209 | 0.371  | 0.668  | -0.297 |
| 1.568  | 1.442  | -0.655 | -0.601 | -0.054 |
| -1.318 | -1.044 | 0.204  | -0.158 | 0.362  |
| 1.178  | 0.758  | -0.023 | -0.092 | 0.069  |

|        |        |        |        |        |
|--------|--------|--------|--------|--------|
| -0.701 | -0.397 | -0.408 | -0.308 | -0.101 |
| 0.264  | -0.504 | -0.673 | 0.850  | -1.523 |
| 0.376  | 0.051  | 0.115  | -0.151 | 0.266  |
| -0.840 | 0.199  | -0.364 | -0.241 | -0.123 |
| 0.132  | -0.378 | 0.027  | -0.266 | 0.293  |
| -1.915 | -1.415 | -0.045 | -0.141 | 0.096  |
| -1.588 | -1.304 | 0.404  | 0.753  | -0.349 |
| -1.345 | 0.259  | 0.187  | -0.193 | 0.379  |
| -0.513 | -0.814 | 0.382  | 0.730  | -0.348 |
| -2.391 | -1.658 | -0.027 | 0.242  | -0.269 |
| 0.234  | -0.680 | 0.441  | -0.209 | 0.650  |
| 1.870  | 1.727  | 0.162  | 0.072  | 0.090  |
| -1.336 | -1.760 | 0.362  | 0.933  | -0.571 |
| -0.529 | 0.020  | 0.585  | 1.065  | -0.480 |
| -1.574 | -0.557 | 0.115  | 0.109  | 0.006  |
| 0.876  | 1.031  | 0.071  | 0.455  | -0.384 |
| -1.692 | -1.746 | -0.358 | 0.234  | -0.591 |
| -0.785 | -0.991 | 0.305  | 0.114  | 0.190  |
| 0.373  | 1.328  | 0.178  | -0.057 | 0.235  |
| -1.065 | -1.492 | -0.081 | -0.063 | -0.018 |
| -1.500 | -1.432 | -0.249 | 0.094  | -0.342 |
| 0.596  | 2.218  | -0.261 | -0.470 | 0.209  |
| -1.994 | -1.925 | -0.282 | 0.580  | -0.862 |
| -1.287 | -0.151 | 0.303  | -0.362 | 0.665  |
| 1.097  | 0.890  | -0.466 | -0.085 | -0.382 |
| 1.691  | 1.707  | -0.713 | -0.497 | -0.216 |
| 0.795  | 2.371  | 0.204  | -1.387 | 1.591  |
| 0.216  | -0.417 | -0.145 | -0.114 | -0.031 |
| 0.026  | 0.957  | -0.198 | -0.163 | -0.036 |
| 0.226  | 0.991  | -0.388 | 0.015  | -0.403 |
| -0.912 | -0.148 | 0.030  | 0.701  | -0.672 |
| 0.792  | 0.198  | 0.289  | 0.095  | 0.194  |
| -0.461 | -0.069 | -0.102 | -0.842 | 0.741  |
| -1.267 | -0.390 | 0.150  | -0.193 | 0.343  |
| -0.611 | 0.098  | -0.506 | -0.395 | -0.111 |
| 3.231  | 2.516  | -0.285 | -0.094 | -0.190 |
| -1.379 | -0.840 | 0.101  | -0.995 | 1.096  |
| -2.616 | -2.130 | -0.973 | -1.191 | 0.218  |
| -1.272 | -1.643 | 0.223  | -0.309 | 0.532  |
| 2.263  | 2.148  | 0.629  | 0.429  | 0.200  |
| -0.934 | -0.745 | -0.503 | 0.110  | -0.612 |
| -0.007 | 0.038  | 0.278  | 0.428  | -0.150 |
| 1.783  | 1.014  | -0.029 | 0.146  | -0.175 |
| 1.054  | 0.911  | 0.102  | -0.120 | 0.222  |
| -0.055 | 0.282  | -0.241 | 0.042  | -0.283 |
| -3.517 | -2.267 | 0.527  | 0.074  | 0.453  |
| 1.361  | 1.243  | -0.015 | 0.379  | -0.394 |
| -3.373 | -2.980 | -0.084 | 0.679  | -0.762 |
| 1.247  | 1.425  | 0.065  | -0.425 | 0.490  |
| -1.789 | -1.770 | -0.034 | -0.121 | 0.087  |
| -1.107 | -1.667 | 0.745  | 0.245  | 0.500  |

|        |        |        |        |        |
|--------|--------|--------|--------|--------|
| -3.218 | -3.195 | 0.043  | 0.073  | -0.030 |
| -2.524 | -2.630 | 0.180  | 0.532  | -0.352 |
| -2.117 | -2.030 | 0.136  | 0.238  | -0.102 |
| -2.722 | -2.624 | 0.723  | 0.522  | 0.201  |
| -2.915 | -2.442 | -0.064 | -0.381 | 0.317  |
| -1.526 | -1.230 | 0.177  | 0.003  | 0.174  |
| -2.042 | -1.396 | -0.043 | -0.516 | 0.473  |
| -2.049 | -2.256 | -0.137 | -0.325 | 0.188  |
| -3.217 | -2.879 | -0.010 | -0.482 | 0.473  |
| -2.007 | -1.778 | 0.128  | -1.039 | 1.167  |
| -0.226 | -0.055 | 0.363  | 0.081  | 0.283  |
| -2.860 | -2.603 | -0.172 | -0.482 | 0.310  |
| -2.015 | -2.148 | 0.296  | 0.466  | -0.170 |
| -1.720 | -1.452 | 0.155  | -0.510 | 0.665  |
| -0.906 | -0.949 | -0.021 | 0.233  | -0.254 |
| -2.222 | -1.698 | -0.128 | 0.355  | -0.483 |
| -2.919 | -2.101 | 0.053  | 0.569  | -0.516 |
| -1.686 | -1.397 | 0.013  | -0.243 | 0.256  |
| -1.826 | -1.503 | 0.006  | -0.360 | 0.366  |
| -1.260 | -1.836 | 0.079  | 0.550  | -0.471 |
| -0.097 | -0.732 | 0.105  | 0.317  | -0.212 |
| -1.205 | -0.843 | 0.109  | 0.419  | -0.309 |
| -0.847 | -1.453 | 0.030  | 0.042  | -0.012 |
| -2.206 | -2.211 | -0.094 | 0.707  | -0.801 |
| -1.718 | -1.421 | 0.235  | -0.208 | 0.444  |
| -1.473 | -1.736 | 0.064  | -0.090 | 0.154  |
| 0.026  | 0.120  | 0.383  | 0.519  | -0.136 |
| -2.008 | -1.576 | -0.318 | -0.280 | -0.038 |
| -2.190 | -1.796 | -0.154 | 0.081  | -0.235 |
| 1.369  | 0.658  | 0.167  | 0.031  | 0.136  |
| -1.506 | -1.912 | 0.181  | 0.065  | 0.115  |
| -0.927 | -0.658 | 0.324  | 0.237  | 0.087  |
| -2.267 | -1.945 | -0.006 | 0.033  | -0.039 |
| -0.872 | -0.826 | 0.446  | -0.349 | 0.795  |
| -2.914 | -2.321 | 0.241  | -0.371 | 0.611  |
| -2.121 | -1.551 | 0.035  | 0.755  | -0.720 |
| -2.521 | -2.184 | -0.111 | -0.261 | 0.150  |
| 1.928  | 1.019  | 0.223  | 0.404  | -0.181 |
| -0.954 | -0.327 | 0.117  | -0.003 | 0.119  |
| -2.548 | -2.574 | 0.130  | -0.195 | 0.325  |
| -2.331 | -2.531 | -0.213 | 0.075  | -0.288 |
| -0.911 | -0.415 | 0.122  | -0.418 | 0.540  |
| -2.413 | -1.714 | -0.123 | -0.840 | 0.718  |
| -0.396 | -0.233 | 0.348  | 0.205  | 0.143  |
| -1.668 | -1.851 | 0.325  | -0.152 | 0.476  |
| -0.168 | 0.128  | -0.411 | -0.340 | -0.071 |
| -0.387 | -0.420 | -0.125 | 0.161  | -0.287 |
| 1.542  | -0.169 | -0.790 | 0.099  | -0.888 |
| -1.352 | -0.947 | -0.134 | -0.129 | -0.005 |
| 0.277  | -0.801 | 0.750  | 0.104  | 0.646  |
| -0.086 | -1.087 | -0.037 | 0.378  | -0.415 |

|        |        |        |        |        |
|--------|--------|--------|--------|--------|
| 1.510  | 0.829  | -0.187 | -0.079 | -0.108 |
| 0.301  | -0.355 | 0.146  | 0.463  | -0.317 |
| 1.020  | 1.009  | 0.388  | 0.208  | 0.180  |
| -0.361 | -0.407 | -0.217 | -0.103 | -0.114 |
| -0.734 | -0.052 | -0.035 | -0.264 | 0.229  |
| 0.911  | -0.097 | 0.064  | 0.506  | -0.443 |
| 0.704  | -0.378 | 0.265  | -0.133 | 0.399  |
| -2.028 | -1.683 | 0.226  | -0.371 | 0.596  |
| -2.453 | -1.874 | -0.352 | -0.235 | -0.117 |
| -3.214 | -2.298 | -0.038 | 0.714  | -0.753 |
| 1.259  | 1.409  | -0.170 | 0.088  | -0.258 |
| -1.311 | -1.040 | -0.100 | -0.072 | -0.028 |
| -0.795 | -0.916 | 0.334  | -0.292 | 0.626  |
| -0.537 | -0.204 | -0.693 | 0.012  | -0.705 |
| 0.878  | 0.499  | 0.139  | -0.097 | 0.236  |
| 0.397  | 0.448  | 0.775  | -0.034 | 0.809  |
| -0.795 | -0.644 | 0.084  | 0.216  | -0.131 |
| -3.569 | -1.386 | -1.062 | 1.505  | -2.567 |
| -4.498 | -2.524 | -1.026 | -0.416 | -0.610 |
| -2.373 | -1.468 | -0.127 | -0.546 | 0.418  |
| -0.826 | -0.533 | -1.192 | -0.710 | -0.482 |
| -1.063 | -1.439 | 0.012  | 0.326  | -0.314 |
| 2.312  | 1.795  | 0.057  | 0.142  | -0.085 |
| -2.285 | -2.273 | -0.917 | -0.622 | -0.296 |
| -0.766 | -1.588 | -0.148 | -0.017 | -0.131 |
| 0.127  | -1.858 | -0.179 | 0.322  | -0.501 |
| -0.812 | -0.110 | 0.077  | -0.587 | 0.663  |
| -1.086 | -1.048 | -0.785 | -0.430 | -0.356 |
| 0.453  | -0.307 | -0.087 | 0.950  | -1.037 |
| 0.980  | 0.929  | 0.623  | 0.258  | 0.365  |
| 1.288  | 0.968  | 0.315  | 0.577  | -0.261 |
| 1.237  | 0.875  | -0.686 | -0.116 | -0.570 |
| -0.218 | 0.284  | -0.132 | -0.429 | 0.297  |
| -1.166 | -0.947 | 0.697  | 0.446  | 0.251  |
| 2.043  | 1.772  | 0.659  | 0.340  | 0.319  |
| -1.643 | 0.321  | 0.032  | -0.035 | 0.066  |
| 1.221  | 0.887  | 0.574  | 0.313  | 0.261  |
| 1.087  | 0.722  | 0.334  | 0.015  | 0.319  |
| -0.704 | -0.498 | -0.158 | -0.310 | 0.152  |
| 0.319  | 0.666  | 0.104  | 0.336  | -0.231 |
| 1.690  | 1.223  | 0.402  | 0.183  | 0.219  |
| 1.376  | 1.023  | -0.244 | 0.588  | -0.831 |
| 0.523  | 0.427  | -0.944 | -0.096 | -0.848 |
| 0.249  | 0.360  | -0.073 | -0.667 | 0.594  |
| -0.842 | -0.374 | -1.135 | -0.379 | -0.757 |
| -0.438 | 0.194  | 0.082  | 0.189  | -0.107 |
| -0.531 | 0.290  | 0.339  | -1.163 | 1.501  |
| 2.129  | 2.076  | 0.513  | -0.105 | 0.618  |
| -2.407 | -1.917 | 0.063  | -0.487 | 0.550  |
| -3.262 | -3.143 | 0.130  | -0.240 | 0.370  |
| -2.463 | -2.129 | 0.258  | -0.520 | 0.778  |

|        |        |        |        |        |
|--------|--------|--------|--------|--------|
| 0.548  | 0.110  | -0.263 | -0.430 | 0.167  |
| -0.725 | -0.285 | 0.294  | 0.305  | -0.011 |
| 1.012  | 0.115  | -0.221 | 0.156  | -0.377 |
| 1.146  | -0.024 | 0.204  | 0.229  | -0.025 |
| 1.505  | 0.712  | -0.165 | 0.034  | -0.199 |
| 2.181  | 1.528  | 0.235  | 0.090  | 0.144  |
| 0.054  | 0.826  | 0.011  | -0.637 | 0.648  |
| 1.406  | 1.364  | 0.821  | -0.071 | 0.893  |
| -0.574 | -1.273 | 0.117  | 0.078  | 0.039  |
| 0.933  | -0.552 | 0.001  | 0.429  | -0.428 |
| -1.178 | -0.564 | -0.496 | -0.869 | 0.373  |
| 0.713  | 1.077  | -0.059 | 0.350  | -0.409 |
| 0.582  | 1.127  | -0.308 | -0.007 | -0.301 |
| 2.348  | 1.052  | 0.017  | 0.727  | -0.710 |
| 0.230  | 0.387  | 0.634  | -0.830 | 1.464  |
| -0.604 | -1.079 | -0.434 | -0.198 | -0.236 |
| 0.667  | 0.899  | 0.327  | 0.293  | 0.034  |
| 1.434  | 0.697  | 0.794  | 0.184  | 0.610  |
| 2.244  | 2.761  | 0.343  | -0.500 | 0.844  |
| -0.091 | 0.394  | -0.537 | -0.847 | 0.311  |
| 1.085  | 1.291  | -1.047 | -0.209 | -0.837 |
| -1.566 | -1.851 | 0.112  | -0.220 | 0.332  |
| -1.242 | -0.117 | 0.113  | -0.879 | 0.992  |
| -0.410 | 0.143  | 0.126  | -0.496 | 0.622  |
| -1.767 | -1.467 | -0.272 | -0.518 | 0.246  |
| -2.214 | -1.661 | -0.233 | -0.334 | 0.101  |
| 0.050  | 0.254  | 0.490  | -0.257 | 0.747  |
| -0.375 | -0.029 | 0.089  | -0.027 | 0.116  |
| -0.393 | -0.464 | -0.148 | -0.221 | 0.073  |
| 2.806  | 1.893  | -1.010 | -0.065 | -0.944 |
| 1.081  | 1.385  | -0.210 | 0.044  | -0.254 |
| -0.520 | -1.618 | -0.675 | -0.111 | -0.564 |
| -0.679 | -0.286 | -0.195 | -0.077 | -0.118 |
| -1.038 | -0.506 | 0.069  | -0.236 | 0.305  |
| -1.869 | -1.756 | 0.105  | -0.642 | 0.747  |
| 0.119  | -0.711 | -0.171 | -0.254 | 0.082  |
| -1.168 | -0.775 | 0.076  | -0.563 | 0.639  |
| -1.964 | -1.448 | 0.241  | -0.169 | 0.411  |
| 1.881  | 2.331  | 0.296  | -0.046 | 0.342  |
| -0.049 | -0.493 | 0.074  | 0.250  | -0.175 |
| 1.504  | 0.971  | 0.201  | 0.632  | -0.431 |
| -0.308 | 0.186  | -0.077 | -0.041 | -0.037 |
| 1.558  | 1.745  | 0.088  | -0.014 | 0.101  |
| -2.354 | -1.671 | 0.128  | -0.432 | 0.559  |
| 2.182  | 1.701  | -0.035 | 0.293  | -0.328 |
| -0.704 | -0.269 | 0.618  | -0.149 | 0.767  |
| -1.790 | -1.190 | -0.777 | -0.568 | -0.209 |
| -0.423 | -0.031 | -0.091 | -0.544 | 0.453  |
| -2.613 | -1.988 | -0.277 | -0.347 | 0.069  |
| -1.242 | -2.291 | -0.130 | 0.403  | -0.533 |
| -2.181 | -2.213 | 0.191  | -0.225 | 0.415  |

|        |        |        |        |        |
|--------|--------|--------|--------|--------|
| -1.530 | 0.360  | 0.100  | -0.448 | 0.548  |
| 1.728  | 1.346  | 0.778  | 0.606  | 0.172  |
| 1.466  | 0.337  | 0.362  | 0.091  | 0.271  |
| -0.039 | 0.560  | 0.150  | -0.238 | 0.388  |
| 0.990  | 1.195  | -1.081 | -0.277 | -0.804 |
| -0.528 | -0.952 | -0.712 | -0.523 | -0.190 |
| -2.514 | -1.371 | 0.146  | 0.301  | -0.155 |
| 0.357  | -0.874 | -0.206 | -0.062 | -0.144 |
| 0.207  | 0.628  | -0.601 | -0.459 | -0.142 |
| -0.451 | -1.068 | 0.110  | -0.104 | 0.214  |
| -1.927 | -1.977 | 0.339  | -0.185 | 0.525  |
| -2.899 | -1.782 | -0.251 | 0.250  | -0.500 |
| 1.991  | 2.205  | 0.175  | -0.341 | 0.516  |
| -0.916 | -1.379 | -0.338 | -0.388 | 0.050  |
| -0.177 | -0.233 | 0.008  | -0.357 | 0.364  |
| 0.115  | -1.067 | 0.513  | 0.099  | 0.415  |
| -1.102 | -0.606 | 0.129  | -0.603 | 0.733  |
| 0.153  | -0.304 | -0.148 | 0.088  | -0.236 |
| -0.492 | -0.889 | -0.597 | -0.393 | -0.204 |
| 1.081  | 0.110  | -0.133 | -0.686 | 0.553  |
| -1.583 | -2.143 | 0.112  | -0.027 | 0.139  |
| -1.545 | -1.825 | -0.357 | -0.068 | -0.289 |
| 3.223  | 2.127  | -0.972 | -0.166 | -0.807 |
| -0.249 | -0.928 | -0.432 | -0.412 | -0.020 |
| 0.139  | -0.294 | 0.813  | -0.336 | 1.149  |
| 2.612  | 1.521  | 0.372  | -0.368 | 0.740  |
| -1.811 | -1.328 | 0.156  | -0.083 | 0.239  |
| -0.176 | 0.581  | 0.381  | 0.089  | 0.291  |
| 0.890  | 0.955  | 0.347  | -0.283 | 0.630  |
| 0.528  | 0.171  | 0.324  | 0.457  | -0.133 |
| 1.298  | 0.013  | 0.114  | 0.614  | -0.499 |
| 0.214  | 0.855  | -0.078 | -0.699 | 0.621  |
| 0.581  | 0.262  | 0.232  | 0.090  | 0.142  |
| 0.714  | 1.039  | 0.209  | -0.401 | 0.610  |
| 1.939  | 2.593  | 0.325  | -0.276 | 0.600  |
| -1.313 | -1.481 | 0.271  | -0.548 | 0.819  |
| -1.589 | -1.608 | -0.240 | 0.023  | -0.264 |
| -2.441 | -2.282 | 0.135  | 0.450  | -0.315 |
| -2.084 | -1.270 | -0.498 | -0.442 | -0.057 |
| -1.043 | -1.729 | 0.195  | 0.696  | -0.501 |
| -0.220 | 0.051  | 0.265  | -0.107 | 0.372  |
| -1.907 | -1.833 | -0.114 | -0.244 | 0.130  |
| 1.081  | 0.597  | -0.978 | -0.346 | -0.631 |
| 0.159  | 0.531  | 0.749  | -0.197 | 0.946  |
| 1.182  | -0.112 | 0.207  | 0.093  | 0.114  |
| 1.343  | 1.129  | 0.169  | 0.333  | -0.164 |
| -3.423 | -2.697 | -0.510 | -1.102 | 0.592  |
| 0.983  | 0.917  | 0.544  | 0.387  | 0.157  |
| -0.911 | -0.341 | 0.284  | -0.106 | 0.390  |
| -1.221 | -1.106 | -0.095 | -0.444 | 0.349  |
| 0.689  | 0.058  | 0.190  | 0.293  | -0.103 |

|        |        |        |        |        |
|--------|--------|--------|--------|--------|
| 0.265  | -0.401 | 0.267  | 0.601  | -0.334 |
| 1.082  | 0.459  | 0.611  | 0.396  | 0.215  |
| -1.933 | -1.600 | 0.105  | -0.667 | 0.772  |
| -1.301 | -1.558 | 0.306  | -0.099 | 0.405  |
| 1.021  | 1.148  | 0.224  | 0.120  | 0.103  |
| -1.338 | -1.911 | -0.201 | 0.054  | -0.254 |
| 0.240  | 0.520  | 1.621  | 0.525  | 1.097  |
| -1.175 | -1.005 | -0.035 | -0.072 | 0.036  |
| 1.067  | -0.131 | 0.272  | 0.539  | -0.267 |
| -0.359 | -0.929 | 0.620  | 0.281  | 0.339  |
| 0.623  | -0.072 | 0.016  | 0.295  | -0.280 |
| -1.471 | -2.031 | 0.091  | 0.113  | -0.022 |
| -0.239 | -1.399 | -0.090 | 0.550  | -0.640 |
| -2.735 | -2.277 | -0.054 | -0.806 | 0.751  |
| -1.648 | -1.675 | -0.195 | 0.216  | -0.411 |
| -1.416 | -1.200 | 0.148  | 0.644  | -0.495 |
| -0.841 | -0.756 | 0.035  | 0.048  | -0.013 |
| -2.337 | -3.060 | -0.164 | 0.234  | -0.398 |
| 0.039  | -0.026 | 0.238  | 0.105  | 0.133  |
| -2.141 | -1.904 | 0.607  | 0.205  | 0.402  |
| 2.581  | 1.609  | -0.011 | -0.400 | 0.390  |
| -0.165 | -1.337 | 0.390  | 0.553  | -0.163 |
| -0.866 | -0.609 | 0.353  | -0.352 | 0.705  |
| 0.280  | 0.340  | -0.229 | 0.123  | -0.352 |
| 0.351  | 0.694  | -0.285 | -0.829 | 0.544  |
| -0.600 | -0.794 | -0.099 | 0.036  | -0.135 |
| 1.947  | 1.652  | 0.229  | -0.066 | 0.295  |
| 1.561  | 2.156  | -0.059 | 0.036  | -0.095 |
| 0.328  | -0.681 | 0.274  | 0.489  | -0.215 |
| -2.726 | -2.721 | -0.092 | 0.418  | -0.510 |
| -2.717 | -2.384 | -0.079 | -0.346 | 0.267  |
| 0.350  | 0.096  | 0.187  | 0.579  | -0.392 |
| 1.571  | 0.287  | 0.166  | 0.721  | -0.555 |
| 1.428  | 0.733  | 0.464  | 0.391  | 0.073  |
| 0.773  | 1.424  | -0.335 | -0.629 | 0.294  |
| 0.974  | 0.083  | -0.578 | -0.439 | -0.139 |
| -2.333 | -1.791 | -0.378 | -0.112 | -0.266 |
| -1.588 | -1.517 | 0.100  | 0.494  | -0.394 |
| -1.838 | -0.237 | -0.567 | 0.419  | -0.986 |
| 0.352  | 0.519  | 0.307  | 0.037  | 0.270  |
| 1.628  | 0.533  | 0.451  | 0.087  | 0.364  |
| 1.243  | 0.894  | 0.224  | 1.399  | -1.175 |
| -0.821 | -0.330 | 0.074  | -0.209 | 0.283  |
| 2.704  | 1.775  | 0.638  | 0.568  | 0.070  |
| -1.038 | -1.262 | -0.260 | -0.076 | -0.184 |
| -0.766 | -0.353 | 0.155  | -0.336 | 0.491  |
| -2.103 | -1.652 | 0.664  | 0.115  | 0.549  |
| -2.155 | -1.204 | 0.299  | 0.151  | 0.148  |
| -1.461 | -2.111 | -0.241 | 0.419  | -0.661 |
| -0.491 | -0.102 | -0.189 | -0.477 | 0.287  |
| -0.645 | -0.506 | -0.418 | -0.288 | -0.130 |

|        |        |        |        |        |
|--------|--------|--------|--------|--------|
| -0.608 | -1.371 | 0.323  | 0.410  | -0.087 |
| 2.052  | 1.223  | 0.057  | -0.251 | 0.309  |
| 2.037  | 2.101  | -0.710 | -0.969 | 0.259  |
| 0.482  | -0.149 | -0.326 | -0.466 | 0.139  |
| 0.042  | 0.345  | 0.719  | 0.158  | 0.561  |
| 1.296  | 0.502  | -0.597 | -0.123 | -0.474 |
| 1.963  | 0.730  | 0.191  | 0.294  | -0.104 |
| 1.187  | 0.781  | 0.128  | 0.056  | 0.072  |
| 0.361  | 1.066  | 0.028  | -0.705 | 0.733  |
| -1.216 | -0.629 | -0.857 | -0.923 | 0.066  |
| -1.095 | -1.678 | -0.096 | 0.649  | -0.746 |
| -1.116 | -1.498 | -0.344 | -0.294 | -0.050 |
| 1.117  | 0.187  | 0.209  | 0.098  | 0.111  |
| 0.904  | -0.614 | -0.263 | -0.337 | 0.074  |
| -0.406 | -0.184 | -0.792 | -0.402 | -0.390 |
| 1.781  | 1.123  | 0.284  | 0.549  | -0.265 |
| 1.533  | 0.391  | -0.670 | -0.688 | 0.018  |
| -1.055 | -0.425 | -0.269 | -0.845 | 0.575  |
| -0.939 | -0.712 | 0.273  | -0.243 | 0.516  |
| 0.330  | 0.163  | 0.744  | -0.297 | 1.041  |
| -1.491 | -1.182 | -0.216 | -0.466 | 0.250  |
| -0.005 | -0.654 | -0.002 | -0.380 | 0.378  |
| -0.703 | -0.035 | 0.235  | -0.287 | 0.523  |
| 2.057  | 0.265  | -0.439 | 0.039  | -0.477 |
| -0.067 | 0.751  | -0.241 | -0.705 | 0.464  |
| 2.017  | 1.017  | -0.472 | 0.009  | -0.481 |
| -0.194 | -1.092 | 0.029  | 0.229  | -0.200 |
| 1.058  | 0.416  | 0.245  | 0.428  | -0.184 |
| 1.168  | 0.815  | 0.330  | 0.601  | -0.271 |
| -0.819 | -1.356 | -0.247 | 0.739  | -0.986 |
| 0.616  | -0.440 | 0.209  | 0.229  | -0.020 |
| 0.601  | 0.839  | 0.159  | 0.225  | -0.066 |
| -1.276 | -1.403 | -0.214 | 0.126  | -0.340 |
| -0.200 | -0.686 | 0.464  | 0.515  | -0.052 |
| -1.490 | -2.322 | -0.103 | 0.106  | -0.209 |
| -1.471 | -0.587 | -0.179 | -0.654 | 0.475  |
| -0.708 | -0.362 | 0.383  | -0.665 | 1.048  |
| -0.688 | -0.965 | -0.096 | 0.197  | -0.293 |
| -1.571 | -1.458 | 0.976  | -0.109 | 1.085  |
| 0.964  | -0.264 | -0.457 | 0.149  | -0.606 |
| 0.371  | -0.256 | -0.137 | -0.106 | -0.030 |
| -1.747 | -1.177 | -0.007 | -0.250 | 0.243  |
| 2.129  | 1.803  | 0.086  | 0.075  | 0.010  |
| 1.900  | 1.554  | 0.610  | 0.382  | 0.227  |
| 0.458  | 0.944  | 0.056  | 0.266  | -0.210 |
| 3.650  | 2.430  | 0.120  | -0.221 | 0.341  |
| 2.419  | 2.646  | 0.353  | -0.596 | 0.949  |
| -1.448 | -0.434 | 0.028  | 0.077  | -0.049 |
| -0.445 | -1.129 | 0.516  | -0.267 | 0.783  |
| -1.169 | -0.647 | 0.301  | 0.529  | -0.228 |
| 0.088  | -0.085 | 0.400  | 0.030  | 0.370  |



|        |        |        |        |        |
|--------|--------|--------|--------|--------|
| 0.416  | 1.056  | 0.423  | 0.157  | 0.266  |
| -2.477 | -1.951 | 0.240  | 0.618  | -0.378 |
| -0.187 | -0.263 | 0.046  | 0.587  | -0.541 |
| -1.381 | -2.186 | 0.119  | 0.419  | -0.300 |
| -1.274 | -1.186 | 0.136  | 0.365  | -0.229 |
| -2.502 | -2.501 | 0.531  | 0.040  | 0.492  |
| -0.086 | 0.248  | -0.048 | -0.078 | 0.030  |
| -2.874 | -2.666 | 0.476  | -0.002 | 0.478  |
| 1.069  | 1.683  | 0.679  | -0.585 | 1.265  |
| -1.033 | -1.166 | 0.419  | 0.282  | 0.137  |
| 0.095  | -0.105 | 0.307  | 0.695  | -0.388 |
| -3.240 | -2.509 | -0.258 | -0.648 | 0.390  |
| -0.225 | -0.942 | 0.714  | 0.078  | 0.636  |
| 2.048  | 1.344  | 0.280  | 0.380  | -0.100 |
| 1.995  | 1.651  | 0.182  | 0.077  | 0.105  |
| 1.626  | 2.433  | 0.843  | 0.954  | -0.111 |
| -0.888 | -0.984 | -0.019 | -0.037 | 0.017  |
| 0.270  | 0.420  | 0.348  | 0.011  | 0.337  |
| -0.772 | -1.746 | 0.497  | 0.500  | -0.003 |
| -2.035 | -1.464 | 0.537  | 0.017  | 0.520  |
| -0.625 | -1.032 | -0.184 | 0.313  | -0.496 |
| -1.312 | -1.787 | 0.401  | 0.966  | -0.565 |
| -2.198 | -1.734 | 0.171  | 0.077  | 0.094  |
| 0.828  | -0.197 | 0.016  | 0.809  | -0.792 |
| -1.442 | 0.456  | -0.013 | -0.841 | 0.828  |
| -2.078 | -0.148 | -0.205 | -0.640 | 0.435  |
| -2.928 | -2.680 | 0.217  | -0.395 | 0.612  |
| 0.720  | -0.183 | 0.251  | -0.275 | 0.526  |
| 2.431  | 0.944  | 0.323  | 0.175  | 0.147  |
| 1.281  | 1.019  | -1.306 | -0.806 | -0.500 |
| -0.278 | -0.543 | -0.613 | -0.474 | -0.139 |
| 0.812  | 0.363  | -0.141 | -0.416 | 0.275  |
| -1.531 | -1.147 | 0.281  | 0.347  | -0.066 |
| 0.079  | 0.228  | -0.508 | -0.184 | -0.324 |
| 0.198  | 0.326  | 0.053  | -0.136 | 0.189  |
| -1.376 | -1.110 | 0.299  | -0.215 | 0.514  |
| -0.503 | -1.177 | 0.082  | -0.456 | 0.537  |
| 2.337  | 2.447  | -0.372 | -1.108 | 0.737  |
| 0.127  | -0.149 | -0.289 | 0.465  | -0.754 |
| -1.099 | -1.427 | 0.499  | -0.313 | 0.812  |
| -1.441 | -0.699 | -0.442 | -1.034 | 0.592  |
| 1.290  | 1.214  | -0.315 | 0.109  | -0.424 |
| -0.862 | -0.296 | 0.151  | 0.164  | -0.013 |
| 0.953  | 0.499  | -0.018 | 0.037  | -0.055 |
| -1.789 | -1.773 | -0.138 | -0.606 | 0.468  |
| 0.246  | -0.263 | -1.534 | -1.107 | -0.427 |
| 0.994  | 0.487  | -0.315 | 0.135  | -0.449 |
| 0.935  | 1.069  | 0.172  | -0.645 | 0.817  |
| -0.213 | -0.780 | -1.006 | 0.375  | -1.381 |
| 0.117  | -0.367 | -0.969 | -0.260 | -0.708 |
| 0.799  | -0.891 | 0.104  | 0.231  | -0.127 |

|        |        |        |        |        |
|--------|--------|--------|--------|--------|
| -1.346 | -0.999 | 0.438  | 0.051  | 0.387  |
| 0.755  | 0.944  | 0.030  | 0.122  | -0.092 |
| -0.122 | -0.835 | -0.574 | -0.578 | 0.005  |
| -1.691 | -0.662 | 0.595  | -0.523 | 1.117  |
| -1.712 | -2.784 | -0.028 | -0.170 | 0.142  |
| -1.633 | -1.068 | -0.495 | -0.843 | 0.349  |
| -1.652 | -1.907 | 0.351  | -0.153 | 0.504  |
| -1.933 | -1.808 | -0.063 | -1.020 | 0.957  |
| 1.165  | 0.319  | -0.220 | 0.296  | -0.516 |
| -0.270 | 0.569  | 0.415  | -0.343 | 0.757  |
| -0.915 | -0.549 | 1.048  | -0.435 | 1.483  |
| -0.433 | -0.457 | 0.102  | -0.736 | 0.838  |
| -1.135 | -0.718 | 0.013  | -0.292 | 0.305  |
| 1.662  | 1.925  | 0.085  | -0.284 | 0.369  |
| -0.923 | -0.700 | -0.637 | -0.414 | -0.223 |
| -0.695 | -0.374 | 0.182  | -0.029 | 0.211  |
| -0.784 | 0.719  | 0.239  | -0.059 | 0.298  |
| 1.877  | 0.937  | 0.275  | 0.592  | -0.317 |
| -0.739 | -0.359 | -0.397 | 0.019  | -0.416 |
| 1.980  | 1.460  | 0.317  | 0.120  | 0.197  |
| 1.164  | 0.764  | 0.553  | 0.355  | 0.199  |
| 0.513  | 1.439  | -0.424 | -0.722 | 0.298  |
| -2.480 | -2.283 | -0.118 | -0.446 | 0.329  |
| -0.740 | -0.334 | -0.071 | -0.129 | 0.057  |
| -1.088 | -1.259 | 0.419  | 0.532  | -0.112 |
| -1.206 | -0.881 | 0.346  | -0.126 | 0.471  |
| -0.765 | -1.317 | 0.311  | 0.134  | 0.178  |
| -1.598 | -1.607 | 0.033  | -0.172 | 0.204  |
| -0.913 | -1.081 | 0.714  | -0.080 | 0.795  |
| -2.430 | -3.024 | -0.298 | -0.291 | -0.007 |
| -1.805 | -0.912 | 0.362  | -0.866 | 1.228  |
| -0.255 | -0.436 | -0.283 | -0.124 | -0.159 |
| 0.314  | 0.055  | 0.842  | 1.107  | -0.266 |
| 0.200  | -0.769 | 0.105  | 0.260  | -0.155 |
| 1.305  | 0.668  | -0.106 | -0.070 | -0.036 |
| -1.463 | -0.591 | 0.306  | -0.211 | 0.517  |
| -1.047 | -1.185 | -0.323 | -0.096 | -0.226 |
| 1.949  | 0.971  | -0.793 | 0.054  | -0.847 |
| -2.528 | -2.108 | -0.380 | -0.401 | 0.022  |
| -0.166 | -0.100 | 0.001  | -0.155 | 0.155  |
| -0.833 | -0.815 | 0.643  | -0.103 | 0.746  |
| -0.974 | -0.155 | 0.145  | -0.295 | 0.440  |
| 2.293  | 2.387  | 0.068  | 0.092  | -0.024 |
| 1.326  | 0.612  | 0.581  | 0.426  | 0.155  |
| -0.268 | 0.647  | 0.196  | -0.472 | 0.668  |
| -0.973 | -1.276 | 0.606  | -0.088 | 0.693  |
| 1.736  | 1.819  | 0.406  | -0.054 | 0.460  |
| -0.934 | -0.290 | -0.156 | -0.457 | 0.301  |
| -0.885 | -0.610 | 0.264  | -0.570 | 0.834  |
| 1.335  | 0.712  | -1.017 | -0.793 | -0.224 |
| -3.065 | -1.847 | 0.277  | -0.062 | 0.339  |

|        |        |        |        |        |
|--------|--------|--------|--------|--------|
| -1.268 | -0.932 | 0.220  | -0.269 | 0.490  |
| -0.888 | -0.442 | 0.265  | -0.022 | 0.288  |
| -0.077 | 0.517  | 0.316  | -0.386 | 0.702  |
| -1.699 | -1.301 | -0.047 | 0.453  | -0.499 |
| -3.167 | -2.934 | -0.040 | -0.273 | 0.233  |
| 2.683  | 3.036  | -0.815 | -0.893 | 0.078  |
| 1.905  | 1.322  | -0.751 | -0.124 | -0.627 |
| 1.038  | 1.517  | 0.203  | 0.231  | -0.028 |
| 0.642  | -0.595 | -0.207 | 0.192  | -0.398 |
| -2.249 | -1.835 | 0.305  | -0.316 | 0.621  |
| -1.594 | -1.164 | 0.327  | -1.423 | 1.750  |
| 1.355  | 1.284  | 0.117  | -0.501 | 0.618  |
| 0.700  | 2.246  | 0.030  | -0.818 | 0.849  |
| -0.778 | -1.397 | 0.318  | 0.174  | 0.144  |
| -1.683 | -1.108 | 0.275  | -0.213 | 0.488  |
| 1.123  | 0.829  | 0.032  | 0.019  | 0.013  |
| 1.210  | 2.273  | -0.933 | -1.490 | 0.557  |
| -0.633 | -0.402 | 0.692  | 0.038  | 0.655  |
| -0.353 | -0.362 | 0.147  | 0.314  | -0.167 |
| -0.360 | 0.145  | 0.415  | 0.195  | 0.220  |
| 1.090  | 1.305  | -0.233 | -0.198 | -0.035 |
| 2.136  | 1.598  | 0.386  | 0.337  | 0.049  |
| 2.474  | 0.626  | 0.198  | 0.502  | -0.303 |
| 0.948  | 0.303  | 0.258  | 0.875  | -0.617 |
| -1.421 | -1.086 | 0.115  | -0.636 | 0.751  |
| -0.113 | 0.654  | 0.105  | -0.438 | 0.543  |
| -1.324 | -0.434 | -0.160 | -0.304 | 0.144  |
| 1.001  | 0.530  | 0.215  | 0.907  | -0.692 |
| -0.698 | 0.270  | 0.780  | 0.416  | 0.364  |
| -1.659 | -0.595 | -0.400 | -0.550 | 0.150  |
| 1.515  | 1.087  | -0.352 | -0.332 | -0.020 |
| -0.898 | -0.128 | -0.218 | -0.547 | 0.329  |
| 0.508  | -0.566 | -1.116 | -0.407 | -0.709 |
| -2.676 | -2.871 | 0.347  | -0.050 | 0.397  |
| -0.599 | -0.805 | 0.484  | 0.321  | 0.163  |
| -0.162 | -1.339 | 0.307  | 0.150  | 0.157  |
| 2.526  | 2.479  | 0.178  | 0.320  | -0.142 |
| 0.646  | 0.549  | 0.567  | -0.503 | 1.070  |
| 1.306  | 1.365  | 0.685  | 0.138  | 0.547  |
| 0.309  | -0.250 | 0.098  | 0.025  | 0.074  |
| 2.520  | 1.424  | 0.582  | 0.637  | -0.055 |
| 1.426  | 0.281  | -0.266 | 0.300  | -0.565 |
| -1.610 | -0.706 | -0.276 | -1.135 | 0.859  |
| 2.508  | 1.220  | 0.283  | 0.284  | -0.002 |
| 1.819  | 1.627  | 0.453  | -0.093 | 0.546  |
| 0.604  | 0.345  | 0.082  | -0.080 | 0.162  |
| 1.619  | 0.608  | -1.063 | -0.635 | -0.429 |
| -0.643 | -0.448 | -0.136 | -0.413 | 0.277  |
| 2.748  | -4.911 | -0.169 | -1.630 | 1.461  |
| -1.017 | -0.771 | 0.072  | -0.286 | 0.358  |
| -1.665 | -1.389 | 0.365  | -0.623 | 0.988  |

|        |        |        |        |        |
|--------|--------|--------|--------|--------|
| -1.199 | -1.483 | 0.037  | -0.033 | 0.070  |
| -1.943 | -1.618 | 0.691  | -1.104 | 1.794  |
| -1.642 | -0.658 | -0.031 | 0.513  | -0.544 |
| 1.011  | 0.688  | 0.361  | 0.202  | 0.159  |
| -1.841 | -1.414 | -0.388 | -0.522 | 0.134  |
| 1.665  | 0.652  | 0.269  | 0.040  | 0.229  |
| -1.392 | -0.908 | -0.318 | -0.237 | -0.081 |
| 1.144  | 1.165  | 0.571  | 0.277  | 0.295  |
| 2.158  | 1.586  | 0.146  | 0.484  | -0.338 |
| 0.080  | 0.795  | -0.398 | -0.248 | -0.150 |
| -1.014 | -1.134 | -0.089 | -0.533 | 0.445  |
| -2.476 | -2.577 | 0.144  | 0.013  | 0.131  |
| 0.810  | 0.968  | -0.192 | -0.215 | 0.024  |
| -1.056 | -0.696 | -0.260 | -0.303 | 0.044  |
| -1.297 | -0.335 | -0.110 | -0.752 | 0.643  |
| 0.268  | -1.196 | 0.052  | 0.430  | -0.378 |
| 0.323  | -0.371 | -0.543 | -0.657 | 0.113  |
| 1.110  | 1.260  | -0.312 | -1.020 | 0.708  |
| -1.715 | -2.281 | 0.036  | 0.270  | -0.234 |
| 3.290  | 2.863  | 0.557  | 0.414  | 0.143  |
| 0.581  | -0.473 | 0.072  | 0.292  | -0.220 |
| -0.671 | -1.523 | 0.071  | 0.002  | 0.069  |
| 2.385  | 1.544  | -0.789 | -0.569 | -0.220 |
| 1.241  | 1.174  | 0.222  | 0.501  | -0.280 |
| 1.823  | 1.364  | 0.507  | 0.211  | 0.296  |
| -0.236 | -0.346 | 0.092  | -0.023 | 0.115  |
| 1.685  | 1.127  | -0.532 | 0.095  | -0.627 |
| 0.201  | 0.310  | -0.007 | -0.619 | 0.612  |
| -3.017 | -2.491 | 0.050  | -0.328 | 0.378  |
| 1.634  | 1.377  | 0.181  | 0.203  | -0.022 |
| 1.785  | 0.832  | 0.236  | 0.214  | 0.022  |
| -0.273 | -1.101 | 0.109  | -0.160 | 0.270  |
| -3.395 | -3.094 | -0.187 | -0.185 | -0.001 |
| 2.243  | 1.478  | -0.320 | -0.267 | -0.053 |
| 1.111  | 1.323  | -0.478 | -0.038 | -0.440 |
| -2.057 | -1.211 | 0.582  | -0.334 | 0.916  |
| 2.267  | 1.475  | 0.196  | 0.074  | 0.122  |
| 0.645  | 0.304  | 0.063  | -0.030 | 0.093  |
| -1.106 | -1.806 | -0.096 | 0.081  | -0.178 |
| -0.204 | -0.404 | 0.458  | 0.583  | -0.125 |
| -0.420 | -0.461 | -0.436 | -0.384 | -0.052 |
| 1.561  | 1.334  | 0.184  | 0.120  | 0.063  |
| -1.460 | -1.183 | 0.139  | -0.031 | 0.170  |
| -0.545 | -0.473 | 0.816  | -0.391 | 1.207  |
| 0.113  | 0.022  | 0.048  | 0.203  | -0.154 |
| 1.910  | 2.078  | -0.446 | -0.122 | -0.324 |
| 2.766  | 1.459  | -0.075 | -0.161 | 0.087  |
| 2.144  | 0.834  | 0.278  | 0.683  | -0.405 |
| -1.085 | -0.012 | 0.109  | -0.331 | 0.440  |
| 1.337  | 1.548  | 0.125  | 0.746  | -0.621 |
| -0.123 | 0.108  | 0.378  | -0.035 | 0.413  |

|        |        |        |        |        |
|--------|--------|--------|--------|--------|
| 2.169  | 2.629  | 0.352  | -0.300 | 0.652  |
| -1.243 | -0.750 | -0.128 | -0.343 | 0.215  |
| 1.312  | 0.914  | 0.169  | 0.116  | 0.053  |
| 0.050  | -0.756 | 0.774  | 0.553  | 0.221  |
| 1.546  | 0.775  | -0.281 | 0.079  | -0.360 |
| -0.686 | 0.052  | 0.442  | 0.233  | 0.209  |
| 0.379  | 0.419  | 0.183  | -0.346 | 0.528  |
| -1.842 | -0.938 | -0.591 | -0.867 | 0.275  |
| 0.614  | 0.303  | 0.392  | 0.392  | 0.000  |
| -0.822 | -0.187 | 0.164  | -0.175 | 0.339  |
| 0.063  | 0.104  | 0.336  | -0.070 | 0.406  |
| -0.014 | -0.421 | 0.305  | 0.512  | -0.207 |
| -0.068 | -0.103 | 0.744  | -0.510 | 1.254  |
| 1.648  | 0.729  | -0.259 | 0.114  | -0.373 |
| -2.305 | -1.796 | -0.452 | -0.536 | 0.084  |
| 0.744  | -0.014 | 0.185  | 0.263  | -0.078 |
| 1.441  | 1.271  | 0.259  | 0.264  | -0.005 |
| -1.372 | -1.766 | 0.209  | 0.428  | -0.219 |
| -1.396 | -1.198 | 0.034  | -0.427 | 0.461  |
| 0.347  | 1.550  | 0.258  | -0.727 | 0.985  |
| -1.932 | -1.782 | -0.268 | 0.025  | -0.292 |
| 1.210  | 0.722  | -0.287 | 0.473  | -0.760 |
| -0.144 | 0.094  | -0.009 | 0.377  | -0.386 |
| -0.542 | -0.199 | 0.147  | 0.428  | -0.281 |
| -1.799 | -0.919 | 0.057  | -0.570 | 0.627  |
| -4.361 | -3.833 | -0.289 | -0.800 | 0.512  |
| 2.037  | 2.187  | -0.267 | -0.180 | -0.087 |
| 1.814  | 0.602  | 0.522  | 0.021  | 0.500  |
| -2.680 | -1.651 | 0.299  | -0.134 | 0.433  |
| 0.388  | 0.271  | 0.500  | 0.305  | 0.195  |
| -1.911 | -2.129 | -0.189 | 0.256  | -0.445 |
| -2.458 | -2.555 | 0.031  | -0.268 | 0.298  |
| -1.417 | -1.228 | 0.122  | -0.319 | 0.440  |
| -0.663 | -0.210 | -0.046 | -0.168 | 0.122  |
| -0.822 | -1.698 | -0.032 | 0.515  | -0.546 |
| -1.892 | -1.948 | 0.317  | 0.664  | -0.347 |
| -1.084 | -1.629 | 0.419  | 0.790  | -0.372 |
| -2.194 | -2.300 | -0.034 | -0.421 | 0.387  |
| -2.339 | -2.315 | 0.114  | 0.247  | -0.133 |
| -0.710 | -1.066 | 0.662  | 0.400  | 0.262  |
| -0.488 | -0.523 | 1.514  | 0.710  | 0.805  |
| -1.233 | -1.450 | -0.724 | -0.603 | -0.121 |
| -2.760 | -1.976 | -0.169 | 0.758  | -0.927 |
| -2.270 | -2.037 | -0.072 | 0.191  | -0.263 |
| -3.684 | -3.013 | 0.385  | -0.405 | 0.790  |
| -3.255 | -2.553 | 0.628  | 0.139  | 0.489  |
| -1.247 | -0.940 | 0.133  | -0.589 | 0.722  |
| -1.635 | -1.310 | -0.453 | 0.255  | -0.708 |
| 1.234  | 1.491  | 0.895  | -0.744 | 1.640  |
| -3.541 | -2.651 | 0.118  | 0.276  | -0.159 |
| -2.922 | -2.779 | 0.129  | 0.208  | -0.079 |

|        |        |        |        |        |
|--------|--------|--------|--------|--------|
| -1.808 | -2.323 | -0.171 | -0.524 | 0.353  |
| -3.034 | -2.446 | -0.079 | -0.210 | 0.131  |
| -3.185 | -2.409 | 0.243  | 0.261  | -0.018 |
| -3.202 | -2.728 | 0.000  | 0.858  | -0.859 |
| -3.376 | -2.833 | -0.177 | 0.849  | -1.026 |
| -2.489 | -2.284 | -0.979 | -0.783 | -0.196 |
| -3.779 | -3.462 | 0.032  | -0.304 | 0.336  |
| -3.032 | -2.808 | 0.368  | 0.079  | 0.289  |
| -3.583 | -3.210 | 0.155  | 0.325  | -0.170 |
| -4.150 | -3.439 | 0.010  | 1.154  | -1.144 |
| -2.931 | -2.370 | 0.091  | 0.693  | -0.602 |
| -2.629 | -2.409 | 0.026  | 0.115  | -0.090 |
| -3.023 | -2.300 | -0.037 | -0.109 | 0.072  |
| -2.571 | 0.539  | -0.094 | -1.155 | 1.061  |
| -1.893 | -1.259 | 0.185  | 0.948  | -0.763 |
| -1.786 | -1.249 | 0.078  | 0.569  | -0.491 |
| -2.141 | -2.000 | 0.229  | 0.305  | -0.076 |
| -2.235 | -1.927 | 0.101  | -0.382 | 0.483  |
| -3.187 | -2.837 | 0.016  | 0.692  | -0.675 |
| -4.540 | -4.035 | 0.102  | 0.574  | -0.471 |
| -3.678 | -3.019 | -0.065 | 0.052  | -0.118 |
| -2.705 | -2.799 | 0.324  | 0.081  | 0.244  |
| -4.047 | -3.279 | -0.295 | -0.201 | -0.094 |
| -1.419 | -0.416 | -0.333 | 1.151  | -1.484 |
| -3.136 | -2.256 | -0.240 | 0.133  | -0.373 |
| -3.170 | -2.611 | 0.076  | -0.493 | 0.569  |
| -3.002 | -2.324 | -0.161 | -0.341 | 0.180  |
| -2.210 | -2.006 | -0.194 | 0.037  | -0.231 |
| -2.176 | -1.250 | -0.265 | 0.565  | -0.831 |
| -0.146 | 0.364  | 0.389  | -0.522 | 0.911  |
| -3.277 | -2.899 | 0.390  | 1.141  | -0.752 |
| -2.476 | -2.209 | 0.279  | 0.609  | -0.330 |
| -2.515 | -2.011 | 0.186  | 0.755  | -0.569 |
| -2.613 | -1.769 | -0.329 | 0.083  | -0.411 |
| -1.844 | -1.680 | -0.162 | -0.339 | 0.176  |
| -2.317 | -2.494 | -0.205 | 0.293  | -0.498 |
| -4.073 | -2.327 | 0.300  | 0.538  | -0.238 |
| -3.611 | -0.410 | 0.171  | -0.345 | 0.515  |
| -1.366 | -1.472 | -0.180 | -0.124 | -0.056 |
| 1.087  | -0.224 | -0.724 | -0.393 | -0.331 |
| 1.903  | 1.690  | 0.002  | -0.067 | 0.069  |
| 1.697  | 2.223  | 0.142  | -0.500 | 0.642  |
| 0.169  | 0.230  | 0.039  | -1.124 | 1.163  |
| -0.952 | -1.049 | -0.234 | -0.415 | 0.182  |
| 1.831  | 1.472  | 0.424  | -0.136 | 0.559  |
| -2.053 | -1.992 | 0.412  | 0.291  | 0.121  |
| -1.173 | -2.016 | -1.097 | -0.518 | -0.579 |
| 1.285  | 1.068  | 0.304  | -0.061 | 0.365  |
| 1.208  | 1.350  | 0.097  | 0.328  | -0.231 |
| -3.267 | -2.801 | -0.252 | -0.269 | 0.017  |
| -3.633 | -2.633 | -0.312 | 0.623  | -0.934 |

|        |        |        |        |        |
|--------|--------|--------|--------|--------|
| -3.809 | -3.392 | 0.203  | 0.107  | 0.095  |
| -3.588 | -3.117 | 0.043  | -0.449 | 0.493  |
| -3.402 | -2.642 | 0.044  | -0.124 | 0.168  |
| -3.669 | -3.077 | 0.331  | 1.328  | -0.997 |
| -3.239 | -2.780 | 0.154  | -0.512 | 0.667  |
| -3.363 | -2.745 | 0.002  | 1.051  | -1.049 |
| -3.059 | -2.482 | 0.124  | -0.642 | 0.766  |
| -1.865 | -1.265 | 0.512  | -0.948 | 1.461  |
| -2.819 | -2.331 | -0.060 | 0.092  | -0.152 |
| -4.077 | -3.583 | 0.097  | -1.134 | 1.231  |
| -3.189 | -2.755 | -0.881 | 0.193  | -1.074 |
| -2.283 | -1.524 | -0.320 | 0.519  | -0.839 |
| -2.579 | -1.957 | 0.268  | -0.338 | 0.607  |
| -3.170 | -2.936 | -1.129 | 0.535  | -1.664 |
| -1.943 | -1.674 | 0.192  | 0.953  | -0.761 |
| -3.949 | -3.834 | 0.216  | 0.094  | 0.123  |
| -4.392 | -2.303 | 0.649  | 0.712  | -0.063 |
| -3.459 | -3.001 | 0.268  | -0.109 | 0.377  |
| -3.883 | -3.447 | 0.255  | 0.281  | -0.025 |
| -2.161 | -1.674 | -0.213 | 1.068  | -1.281 |
| -2.595 | -2.154 | -0.236 | -0.177 | -0.059 |
| -2.897 | -2.467 | -0.033 | -0.199 | 0.165  |
| 0.265  | 0.736  | 0.157  | -0.092 | 0.249  |
| 0.793  | 0.042  | -0.409 | 0.274  | -0.683 |
| -2.009 | -1.452 | -0.417 | -0.942 | 0.525  |
| 1.039  | 0.290  | 0.279  | 0.440  | -0.162 |
| 1.885  | 1.179  | 0.814  | 0.802  | 0.012  |
| -2.356 | -1.697 | -0.009 | -0.279 | 0.270  |
| 2.508  | 1.361  | 0.462  | 0.676  | -0.214 |
| -2.177 | -1.894 | -0.056 | 0.588  | -0.644 |
| -3.151 | -2.699 | 0.042  | 0.854  | -0.812 |
| -3.211 | -2.618 | -0.201 | 0.008  | -0.209 |
| 0.911  | 1.244  | -0.172 | -0.485 | 0.313  |
| 0.300  | 0.814  | 0.004  | -0.404 | 0.408  |
| 1.712  | 1.971  | 0.122  | -0.184 | 0.305  |
| -2.329 | -1.801 | -0.123 | -0.554 | 0.431  |
| 1.744  | 1.632  | 0.284  | -0.277 | 0.561  |
| 0.566  | -0.237 | 0.007  | -0.245 | 0.252  |
| 2.330  | 2.116  | 0.039  | -0.124 | 0.163  |
| 0.035  | -0.020 | 0.202  | -0.260 | 0.462  |
| 3.256  | 3.255  | 0.047  | 0.298  | -0.251 |
| -2.269 | -1.366 | -0.631 | -1.349 | 0.718  |
| -1.364 | -1.569 | -0.350 | 0.336  | -0.687 |
| -1.926 | -0.573 | -0.402 | 0.508  | -0.910 |
| 1.636  | 1.898  | -0.488 | -0.337 | -0.151 |
| 0.638  | 0.016  | 0.332  | 0.368  | -0.036 |
| -0.983 | -1.419 | -0.242 | 0.211  | -0.453 |
| 0.395  | -1.296 | -0.132 | -0.042 | -0.090 |
| 0.932  | 0.302  | 0.147  | 0.401  | -0.253 |
| -0.119 | 0.188  | -0.319 | -0.765 | 0.446  |
| -0.495 | 0.158  | 0.207  | -0.516 | 0.723  |

|        |        |        |        |        |
|--------|--------|--------|--------|--------|
| -0.256 | 0.000  | 0.297  | 0.599  | -0.302 |
| -2.091 | -2.211 | -0.355 | 0.104  | -0.458 |
| 1.310  | 1.077  | -0.820 | -0.168 | -0.652 |
| -0.057 | 0.195  | 0.159  | -0.062 | 0.222  |
| -0.742 | -0.206 | -0.021 | -0.121 | 0.101  |
| -0.788 | -0.429 | 0.202  | -0.052 | 0.253  |
| 0.544  | 1.089  | -0.034 | -0.294 | 0.259  |
| -3.236 | -2.413 | -0.245 | -0.215 | -0.030 |
| -0.651 | 1.216  | 0.107  | -0.342 | 0.449  |
| 1.382  | 1.455  | 0.095  | -0.270 | 0.365  |
| 2.555  | 1.202  | 0.738  | 0.466  | 0.272  |
| 1.539  | 1.267  | 0.254  | 0.005  | 0.249  |
| -0.619 | -0.030 | -0.107 | 0.426  | -0.533 |
| 0.433  | 0.544  | 0.699  | -0.214 | 0.914  |
| -2.290 | -2.527 | 0.044  | 0.617  | -0.573 |
| -2.887 | -2.979 | 0.342  | 0.956  | -0.614 |
| 0.328  | -0.086 | 0.193  | -0.069 | 0.262  |
| 2.776  | 2.307  | -0.943 | -0.772 | -0.170 |
| -2.915 | -2.936 | -0.044 | -0.015 | -0.030 |
| -3.406 | -1.563 | 0.230  | 0.478  | -0.248 |
| -1.557 | -1.225 | -0.160 | -0.301 | 0.142  |
| -1.353 | -1.497 | -0.069 | -0.305 | 0.236  |
| -0.739 | -0.724 | 0.141  | -0.008 | 0.148  |
| 0.249  | 0.378  | 0.129  | -0.080 | 0.210  |
| 0.303  | -0.364 | 0.010  | 0.452  | -0.442 |
| -0.389 | -0.030 | -0.223 | -0.908 | 0.684  |
| -1.722 | -2.016 | -0.168 | 0.060  | -0.229 |
| -0.636 | 0.021  | -0.374 | -0.760 | 0.387  |
| 0.166  | 0.034  | 0.345  | 0.434  | -0.089 |
| 1.571  | 2.177  | 0.129  | -1.088 | 1.217  |
| -0.371 | 1.606  | -0.187 | -0.483 | 0.296  |
| 1.105  | 0.252  | 0.335  | 0.209  | 0.126  |
| -1.743 | -1.479 | -0.301 | -0.178 | -0.123 |
| -1.408 | -2.025 | 0.247  | 0.218  | 0.029  |
| -0.289 | -0.211 | 0.049  | -0.221 | 0.270  |
| 2.168  | 2.039  | 0.393  | 0.347  | 0.046  |
| -1.427 | -1.175 | 0.542  | -0.324 | 0.865  |
| 1.128  | 1.743  | -0.140 | 0.077  | -0.217 |
| -2.079 | -1.572 | 0.124  | 0.070  | 0.054  |
| -2.409 | -1.920 | 0.301  | 0.040  | 0.261  |
| -3.906 | -3.596 | -0.103 | 0.285  | -0.388 |
| 2.730  | 2.288  | 0.202  | 0.068  | 0.134  |
| 0.049  | 0.127  | -0.223 | -0.637 | 0.414  |
| 0.391  | 0.513  | -0.444 | -0.504 | 0.060  |
| 0.896  | 1.505  | 0.203  | -0.119 | 0.321  |
| 0.365  | 0.540  | -0.124 | -0.230 | 0.107  |
| 0.855  | 0.525  | 0.221  | 0.313  | -0.092 |
| -0.316 | -0.968 | -0.155 | 0.293  | -0.448 |
| -3.501 | -2.274 | -0.377 | -0.725 | 0.348  |
| -4.046 | -1.750 | -0.225 | -0.144 | -0.081 |
| -3.560 | -2.705 | 0.089  | -0.503 | 0.592  |



|        |        |        |        |        |
|--------|--------|--------|--------|--------|
| -2.229 | -2.029 | 0.125  | 0.014  | 0.111  |
| -1.803 | -1.508 | 0.013  | -0.316 | 0.329  |
| -3.320 | -2.245 | -0.904 | -0.482 | -0.421 |
| -4.673 | -3.907 | -0.426 | -1.300 | 0.874  |
| -1.894 | -1.475 | -1.078 | -1.476 | 0.398  |
| 1.925  | 1.426  | 0.315  | 0.453  | -0.138 |
| 1.032  | 1.262  | 0.101  | -0.524 | 0.625  |
| -1.809 | -1.137 | 1.459  | 0.569  | 0.891  |
| -1.402 | -0.517 | 0.194  | 0.057  | 0.138  |
| -0.481 | 0.612  | 0.375  | -0.546 | 0.921  |
| 0.647  | 0.084  | -0.010 | 0.075  | -0.085 |
| 2.465  | 1.411  | 0.194  | 0.362  | -0.168 |
| -1.444 | -1.179 | -0.136 | 0.118  | -0.254 |
| -2.141 | -0.534 | -0.037 | 0.305  | -0.342 |
| -2.204 | -0.534 | -0.141 | -0.092 | -0.049 |
| -1.981 | -0.654 | -0.029 | -0.825 | 0.796  |
| -1.754 | -0.728 | -0.044 | -0.515 | 0.471  |
| 0.934  | 1.120  | -0.177 | -0.587 | 0.411  |
| 1.482  | 1.428  | 0.364  | 0.274  | 0.089  |
| -1.217 | -0.490 | -0.549 | -0.201 | -0.348 |
| 2.114  | 0.838  | 0.024  | -0.138 | 0.162  |
| -0.761 | -1.222 | 0.015  | 0.256  | -0.241 |
| -1.945 | -1.639 | 0.280  | -0.031 | 0.310  |
| 0.227  | 1.418  | 0.148  | 0.484  | -0.336 |
| -3.331 | -2.798 | 0.257  | -0.114 | 0.371  |
| -0.790 | -0.877 | -0.332 | -0.024 | -0.308 |
| 0.071  | 0.747  | 0.357  | -0.233 | 0.590  |
| 0.483  | 0.315  | 0.740  | 0.057  | 0.683  |
| 0.791  | 1.140  | 0.220  | 0.429  | -0.209 |
| 0.522  | -0.310 | 0.068  | 0.199  | -0.132 |
| 0.383  | -0.240 | 0.133  | -0.261 | 0.393  |
| -2.288 | -1.863 | 0.233  | 0.397  | -0.165 |
| -0.315 | 0.056  | 0.257  | -0.235 | 0.492  |
| -1.642 | -1.493 | 0.259  | 0.304  | -0.046 |
| -2.327 | -1.381 | 0.105  | -0.116 | 0.221  |
| 0.374  | 0.338  | 0.294  | -0.139 | 0.432  |
| 1.340  | 1.027  | 0.118  | -0.007 | 0.126  |
| -2.072 | -2.703 | 0.346  | 0.667  | -0.321 |
| -1.575 | -1.831 | 0.570  | -0.860 | 1.430  |
| -0.999 | -0.366 | 0.533  | -0.309 | 0.842  |
| 1.823  | 1.219  | 0.050  | -0.140 | 0.190  |
| 1.224  | 1.235  | 0.174  | 0.037  | 0.137  |
| 1.108  | 1.141  | 0.010  | -0.322 | 0.331  |
| -2.194 | -2.269 | 0.217  | 0.494  | -0.276 |
| -1.506 | -1.371 | 0.037  | 0.206  | -0.169 |
| -1.424 | -0.637 | 0.167  | -0.300 | 0.467  |
| 1.496  | 0.372  | 0.169  | 0.195  | -0.026 |
| 0.606  | -0.011 | 0.289  | 0.116  | 0.173  |
| -0.760 | -0.114 | -0.147 | -0.587 | 0.439  |
| 0.053  | -0.922 | 0.539  | 0.509  | 0.031  |
| 0.429  | 2.240  | 0.020  | -0.245 | 0.264  |

|        |        |        |        |        |
|--------|--------|--------|--------|--------|
| 0.952  | 0.010  | 0.479  | 0.752  | -0.273 |
| 0.417  | 0.943  | -0.210 | -0.333 | 0.123  |
| 1.814  | 1.419  | 0.141  | 0.314  | -0.173 |
| 0.292  | -0.614 | 0.271  | 0.022  | 0.249  |
| -0.060 | -1.434 | 0.017  | -0.029 | 0.046  |
| -3.060 | -2.658 | -0.420 | -0.456 | 0.036  |
| -2.243 | -1.872 | -0.447 | -0.626 | 0.179  |
| -1.602 | -0.448 | 0.175  | -0.609 | 0.784  |
| -1.865 | -1.310 | -0.325 | -0.404 | 0.080  |
| -0.997 | 0.243  | 0.398  | -1.281 | 1.680  |
| -1.370 | -0.578 | -0.082 | -0.264 | 0.181  |
| -0.151 | -0.637 | 0.405  | 0.053  | 0.352  |
| 1.368  | 2.047  | -0.368 | -0.160 | -0.209 |
| -0.078 | 0.754  | -0.515 | -0.161 | -0.354 |
| -0.019 | -0.362 | -0.147 | 0.238  | -0.385 |
| -1.714 | -1.913 | -0.134 | -0.189 | 0.055  |
| -0.876 | -0.853 | -0.085 | 0.589  | -0.674 |
| -0.354 | -0.849 | -0.037 | -0.244 | 0.206  |
| -2.111 | -2.603 | -0.169 | 0.067  | -0.236 |
| 1.554  | 1.162  | 0.002  | -0.024 | 0.025  |
| -0.709 | -0.746 | 0.196  | 0.412  | -0.216 |
| -0.637 | -0.137 | 0.110  | -0.208 | 0.318  |
| 0.191  | -1.011 | -1.492 | -0.978 | -0.515 |
| 0.387  | -0.876 | -1.267 | -0.359 | -0.908 |
| -1.730 | -0.972 | 0.120  | -0.461 | 0.581  |
| 1.632  | 1.404  | 0.114  | 0.081  | 0.033  |
| -1.913 | -2.437 | 0.515  | -0.169 | 0.684  |
| -1.074 | -1.309 | 0.365  | 0.055  | 0.309  |
| -1.439 | -1.304 | -0.323 | 0.216  | -0.539 |
| -1.016 | -0.346 | 0.068  | -0.171 | 0.239  |
| -0.391 | -0.552 | -0.607 | -0.282 | -0.325 |
| -1.531 | -1.288 | 0.009  | -0.645 | 0.655  |
| -0.943 | -1.329 | 0.183  | 0.231  | -0.048 |
| -1.964 | -0.771 | 0.061  | -0.545 | 0.606  |
| 2.033  | 0.528  | 0.224  | 0.937  | -0.713 |
| 1.912  | 1.621  | 0.090  | 0.067  | 0.024  |
| -0.518 | -1.166 | 0.123  | 0.794  | -0.672 |
| 1.282  | 1.450  | -0.401 | -0.494 | 0.093  |
| 0.180  | -0.688 | 0.290  | -0.005 | 0.295  |
| 0.889  | 1.063  | 0.103  | 0.040  | 0.063  |
| -0.254 | -0.086 | -0.019 | -0.460 | 0.441  |
| -0.269 | -1.059 | -0.362 | -0.009 | -0.353 |
| -0.306 | 0.158  | 0.074  | -0.085 | 0.159  |
| -1.136 | -1.230 | 0.242  | 0.103  | 0.138  |
| 2.306  | 2.064  | 0.300  | 0.171  | 0.129  |
| -0.100 | 0.968  | -0.014 | -1.106 | 1.091  |
| -0.184 | 0.550  | 0.011  | -0.757 | 0.768  |
| -1.022 | -0.719 | -0.005 | 0.651  | -0.655 |
| 2.360  | 2.531  | 0.237  | -0.840 | 1.077  |
| 1.964  | 2.008  | 0.524  | 0.075  | 0.448  |
| -0.634 | -0.188 | 1.014  | -0.197 | 1.211  |

|        |        |        |        |        |
|--------|--------|--------|--------|--------|
| -0.272 | 0.018  | -0.514 | -0.245 | -0.270 |
| -0.065 | -0.019 | 0.450  | -0.042 | 0.492  |
| -1.878 | -1.920 | 0.065  | -0.569 | 0.634  |
| -2.073 | -2.045 | -0.041 | 0.173  | -0.214 |
| -3.038 | -2.851 | 0.634  | 0.465  | 0.170  |
| -0.840 | -0.962 | -0.229 | -0.173 | -0.056 |
| -2.881 | -2.411 | -0.233 | 0.090  | -0.323 |
| -3.764 | -3.193 | -0.411 | -0.116 | -0.295 |
| -1.618 | -1.252 | -0.317 | -0.149 | -0.168 |
| -0.375 | 0.423  | -0.497 | -0.213 | -0.284 |
| -0.778 | -0.770 | 0.333  | 0.025  | 0.308  |
| -0.597 | -0.390 | 0.065  | 0.023  | 0.042  |
| 1.737  | 1.997  | 0.191  | 0.209  | -0.018 |
| 1.685  | 1.265  | 0.432  | 0.158  | 0.274  |
| -1.809 | -1.988 | -0.574 | -0.852 | 0.278  |
| -0.005 | -0.424 | 0.044  | 0.135  | -0.091 |
| 0.627  | -0.405 | -1.016 | -0.408 | -0.608 |
| -0.461 | -0.886 | 0.124  | 0.305  | -0.181 |
| 1.337  | 0.045  | 0.028  | 0.375  | -0.347 |
| 1.077  | 0.297  | 0.313  | 0.326  | -0.013 |
| 1.269  | 0.858  | 0.372  | 0.602  | -0.230 |
| -0.761 | -0.685 | 0.048  | 0.220  | -0.173 |
| 0.713  | 0.009  | -0.326 | -0.167 | -0.159 |
| -0.789 | -0.682 | -0.393 | 0.026  | -0.419 |
| 1.286  | 1.348  | -0.368 | -0.028 | -0.340 |
| -1.597 | -1.477 | 0.994  | 0.466  | 0.528  |
| -2.500 | -1.919 | -0.226 | 0.062  | -0.288 |
| -3.000 | -2.878 | -0.146 | -0.985 | 0.839  |
| -1.229 | -1.321 | 0.305  | 0.409  | -0.105 |
| -2.589 | -2.159 | -0.123 | 0.895  | -1.017 |
| -0.260 | -0.226 | 0.455  | 0.339  | 0.116  |
| 1.013  | 0.066  | 0.329  | 0.579  | -0.250 |
| 0.318  | 0.323  | 0.064  | -0.145 | 0.209  |
| -0.690 | -1.244 | 0.084  | -0.148 | 0.232  |
| 1.808  | 0.790  | -0.060 | 0.594  | -0.654 |
| 1.307  | 0.939  | -0.326 | 0.142  | -0.468 |
| -1.532 | -1.339 | -0.109 | -0.199 | 0.089  |
| -3.582 | -3.078 | -0.040 | -0.168 | 0.128  |
| -3.324 | -2.948 | -0.122 | -1.205 | 1.083  |
| -1.432 | -0.990 | 0.053  | -0.397 | 0.451  |
| 2.505  | 2.079  | -0.076 | 0.132  | -0.208 |
| -2.234 | -2.944 | 0.295  | 0.466  | -0.172 |
| -0.164 | 0.476  | 0.058  | 0.073  | -0.015 |
| 1.707  | 0.728  | 0.092  | 0.526  | -0.434 |
| -0.042 | 0.386  | 0.237  | -0.303 | 0.540  |
| 1.012  | 1.388  | 0.470  | 0.032  | 0.438  |
| 0.720  | 0.815  | 0.017  | -0.288 | 0.305  |
| 0.891  | 1.383  | 0.186  | 0.040  | 0.146  |
| 2.137  | 1.455  | 0.261  | 0.509  | -0.248 |
| 1.928  | 0.734  | -0.232 | -0.019 | -0.214 |
| 0.804  | 0.361  | 0.543  | 0.100  | 0.443  |

|        |        |        |        |        |
|--------|--------|--------|--------|--------|
| 2.072  | 1.115  | 0.411  | -0.210 | 0.621  |
| -0.744 | -1.310 | 0.267  | 0.175  | 0.092  |
| -0.013 | -0.925 | 0.288  | 0.043  | 0.245  |
| 2.751  | 2.378  | 0.565  | 0.139  | 0.426  |
| -3.534 | -3.563 | -0.223 | -0.214 | -0.010 |
| 0.006  | 0.157  | -0.061 | -0.003 | -0.058 |
| 2.396  | 2.359  | 0.344  | 0.020  | 0.324  |
| -1.476 | -0.070 | -0.266 | -0.410 | 0.144  |
| 1.399  | 0.306  | -0.088 | 0.118  | -0.206 |
| 0.273  | -0.930 | -0.082 | -0.028 | -0.054 |
| 0.701  | -0.447 | -0.962 | 0.056  | -1.018 |
| -0.151 | -0.772 | 0.224  | 0.513  | -0.289 |
| -1.959 | -1.580 | -0.568 | -0.281 | -0.287 |
| -1.559 | -1.425 | -0.238 | -0.002 | -0.236 |
| -2.753 | -2.967 | 0.274  | 0.795  | -0.521 |
| 0.151  | 0.177  | 0.232  | 0.289  | -0.057 |
| -1.011 | -0.222 | -0.091 | -0.306 | 0.215  |
| -3.267 | -2.769 | 0.659  | -0.514 | 1.172  |
| 1.270  | 0.691  | 0.210  | 0.202  | 0.009  |
| -0.444 | -0.905 | 0.219  | 0.851  | -0.632 |
| -3.823 | -3.055 | -0.485 | 0.032  | -0.518 |
| -0.561 | -0.546 | 0.253  | -0.267 | 0.521  |
| -0.789 | -1.529 | -0.317 | 0.266  | -0.583 |
| -2.931 | -2.036 | -0.216 | -0.518 | 0.302  |
| -0.518 | -0.990 | -1.066 | -0.435 | -0.632 |
| -1.108 | -1.655 | -0.111 | -1.066 | 0.955  |
| -0.612 | -0.630 | 0.379  | -0.333 | 0.712  |
| -1.845 | -1.437 | 0.278  | -0.174 | 0.452  |
| 1.016  | 0.661  | -0.779 | -0.477 | -0.302 |
| -1.030 | -0.560 | -0.136 | 0.001  | -0.138 |
| -0.561 | 0.045  | -2.381 | -0.315 | -2.065 |
| -0.610 | -1.167 | -0.803 | 0.204  | -1.008 |
| 2.321  | 3.103  | 0.360  | -0.861 | 1.221  |
| 2.355  | 1.871  | 0.489  | -0.134 | 0.623  |
| 2.451  | 2.635  | 0.598  | -0.298 | 0.896  |
| 1.991  | 1.050  | -0.594 | -0.128 | -0.466 |
| 0.723  | 0.086  | 0.661  | 0.232  | 0.429  |
| -0.004 | 0.254  | -0.243 | -0.448 | 0.205  |
| 2.130  | 0.378  | -0.501 | -0.220 | -0.281 |
| 0.186  | -0.194 | -0.060 | -0.188 | 0.128  |
| -1.809 | -2.251 | -0.192 | 1.111  | -1.303 |
| 0.126  | 1.501  | 0.150  | -0.049 | 0.198  |
| 1.327  | 2.380  | 0.189  | -0.369 | 0.558  |
| 1.265  | 1.048  | 0.480  | 0.622  | -0.142 |
| 1.365  | 0.853  | 0.524  | 0.048  | 0.476  |
| -0.458 | -0.540 | 0.718  | 0.115  | 0.604  |
| 0.930  | 1.360  | 0.309  | -0.093 | 0.402  |
| 1.233  | 1.211  | 0.177  | 0.070  | 0.108  |
| 0.683  | -0.159 | -0.244 | 0.124  | -0.369 |
| -0.970 | -0.823 | -0.351 | 0.173  | -0.524 |
| -0.326 | -0.640 | -0.367 | -0.409 | 0.041  |

|        |        |        |        |        |
|--------|--------|--------|--------|--------|
| 0.911  | 1.140  | 0.167  | -0.153 | 0.321  |
| 0.798  | 0.127  | 0.230  | -0.233 | 0.463  |
| 2.431  | 2.274  | 0.260  | 0.351  | -0.090 |
| 1.708  | 1.346  | 0.493  | 0.737  | -0.244 |
| -1.554 | -0.743 | -0.280 | -0.083 | -0.197 |
| -1.508 | -0.012 | 0.124  | -0.233 | 0.358  |
| -1.966 | -0.809 | 0.007  | 0.323  | -0.316 |
| -3.790 | -1.976 | -0.215 | -0.737 | 0.522  |
| -2.092 | -2.293 | 0.117  | 0.444  | -0.326 |
| 1.274  | 0.379  | 0.444  | 0.688  | -0.244 |
| -2.172 | -1.821 | -0.655 | -0.291 | -0.364 |
| -2.535 | -1.468 | -0.085 | -0.077 | -0.008 |
| 0.245  | 0.626  | 0.503  | 0.599  | -0.096 |
| -1.370 | -0.353 | 0.033  | 0.199  | -0.166 |
| 1.247  | 1.543  | -0.155 | -1.133 | 0.977  |
| -0.805 | -0.381 | 0.284  | 0.093  | 0.191  |
| 1.769  | 1.468  | 0.284  | 0.085  | 0.199  |
| 1.902  | 1.460  | -0.414 | -0.178 | -0.236 |
| 0.778  | 1.524  | 0.138  | -0.241 | 0.380  |
| -2.031 | -1.474 | 0.397  | 0.554  | -0.157 |
| -1.053 | -1.261 | 0.141  | 0.113  | 0.028  |
| -1.561 | -0.137 | 0.258  | -0.047 | 0.305  |
| -2.589 | -2.357 | -0.724 | -0.668 | -0.056 |
| 2.079  | 0.895  | -0.212 | -0.334 | 0.122  |
| 1.195  | 0.932  | -0.177 | -1.034 | 0.857  |
| -0.304 | -1.262 | -0.713 | -0.430 | -0.283 |
| -0.957 | -0.905 | -0.315 | -0.011 | -0.304 |
| -2.179 | -2.181 | -0.408 | -0.223 | -0.185 |
| -1.934 | -2.161 | 0.375  | -0.282 | 0.657  |
| -1.050 | -0.819 | -0.518 | 0.038  | -0.555 |
| -0.783 | -0.805 | 0.453  | 0.371  | 0.081  |
| -2.038 | -2.068 | 0.086  | 0.405  | -0.318 |
| 0.810  | 0.291  | -0.990 | -1.060 | 0.070  |
| 3.011  | 2.086  | -0.381 | -1.104 | 0.723  |
| 2.235  | 2.448  | 0.080  | -0.416 | 0.496  |
| 2.986  | 2.291  | 0.061  | -0.395 | 0.456  |
| 2.516  | 1.131  | -1.127 | -0.577 | -0.550 |
| -0.713 | -0.988 | -0.138 | 0.036  | -0.174 |
| -1.261 | -1.385 | 0.753  | 0.700  | 0.052  |
| 0.239  | 0.243  | -0.841 | -0.654 | -0.187 |
| 1.527  | 0.726  | -0.142 | -0.106 | -0.036 |
| 1.717  | 2.541  | 0.179  | -0.032 | 0.210  |
| -0.513 | 0.222  | 0.112  | -0.381 | 0.493  |
| -1.181 | -0.825 | -0.055 | -0.646 | 0.591  |
| -0.879 | 0.456  | 0.111  | -0.390 | 0.501  |
| -0.852 | -1.977 | 0.096  | 0.098  | -0.003 |
| -0.956 | -0.434 | -0.706 | -0.374 | -0.332 |
| -1.732 | -1.301 | -0.206 | -1.368 | 1.162  |
| -0.483 | -0.026 | -0.281 | -0.752 | 0.471  |
| 0.416  | 0.380  | -0.404 | 0.091  | -0.495 |
| -1.622 | -1.905 | -0.957 | 0.065  | -1.021 |

|        |        |        |        |        |
|--------|--------|--------|--------|--------|
| 0.833  | -0.296 | -0.131 | -0.204 | 0.073  |
| -3.609 | -1.996 | 0.168  | -0.511 | 0.679  |
| -0.269 | 0.074  | 0.098  | -0.326 | 0.424  |
| 3.007  | 2.962  | -0.850 | -0.327 | -0.524 |
| 0.437  | 0.489  | -0.636 | -0.203 | -0.433 |
| -0.285 | 0.296  | 0.229  | 0.032  | 0.197  |
| 1.021  | 0.409  | 0.277  | 0.103  | 0.174  |
| -2.699 | -2.117 | -0.798 | -0.697 | -0.101 |
| -1.178 | -0.908 | -0.567 | 0.016  | -0.583 |
| 0.086  | -0.358 | -0.171 | -0.186 | 0.015  |
| -1.263 | -0.604 | -0.263 | -0.841 | 0.578  |
| -1.620 | -1.137 | -0.451 | -0.280 | -0.172 |
| 1.211  | 1.451  | -0.091 | 0.076  | -0.168 |
| 1.035  | 1.350  | 0.282  | 0.624  | -0.342 |
| 2.098  | 1.624  | 0.533  | 0.074  | 0.459  |
| 0.673  | 0.652  | -0.206 | 0.247  | -0.453 |
| 1.252  | 1.768  | 0.266  | -0.123 | 0.390  |
| -2.281 | -1.519 | 0.177  | -0.598 | 0.775  |
| 0.908  | 1.115  | 0.184  | -0.425 | 0.610  |
| -0.017 | 0.207  | -0.001 | -0.026 | 0.025  |
| -0.035 | -0.467 | 0.374  | 0.445  | -0.071 |
| -3.291 | -1.828 | -0.124 | 0.091  | -0.215 |
| -1.337 | -0.319 | 0.588  | -0.689 | 1.277  |
| -2.942 | -2.440 | -0.647 | -0.436 | -0.210 |
| -2.369 | -1.809 | -0.086 | -0.591 | 0.506  |
| -0.883 | -0.801 | 0.195  | -0.156 | 0.351  |
| -1.818 | -1.599 | -0.131 | -0.316 | 0.185  |
| 1.449  | 0.528  | 0.082  | -0.293 | 0.375  |
| 1.914  | 2.111  | 0.214  | 0.065  | 0.150  |
| 1.228  | 0.350  | 0.227  | 0.649  | -0.421 |
| 1.683  | 1.148  | 0.609  | 0.637  | -0.028 |
| 0.448  | 0.730  | 0.662  | 0.000  | 0.662  |
| 2.291  | 1.871  | 0.365  | 0.623  | -0.258 |
| 0.604  | -0.073 | -0.130 | -0.084 | -0.046 |
| 2.166  | 1.894  | 0.217  | -0.047 | 0.264  |
| 2.101  | 1.972  | 0.042  | -0.468 | 0.509  |
| -1.294 | -0.478 | 0.177  | -0.245 | 0.422  |
| -1.174 | -0.530 | 0.178  | -0.490 | 0.669  |
| -2.191 | -1.281 | -0.202 | -0.564 | 0.362  |
| 1.648  | 0.693  | -1.062 | -1.005 | -0.058 |
| 1.253  | 1.244  | 0.174  | 0.206  | -0.032 |
| 1.901  | 1.971  | 0.196  | 0.150  | 0.046  |
| 0.299  | -0.545 | 0.184  | -0.342 | 0.526  |
| -0.387 | 0.840  | -0.002 | 0.181  | -0.183 |
| 0.779  | 1.240  | -0.997 | -0.702 | -0.295 |
| 1.483  | 1.131  | 0.404  | 0.555  | -0.151 |
| 0.010  | 0.504  | -0.173 | -0.527 | 0.355  |
| -0.779 | -0.223 | 0.172  | -0.536 | 0.708  |
| 1.592  | 1.479  | 0.170  | 0.172  | -0.002 |
| 1.794  | 1.750  | 0.331  | 0.464  | -0.133 |
| 1.191  | 1.388  | -0.070 | -0.522 | 0.452  |

|        |        |        |        |        |
|--------|--------|--------|--------|--------|
| 0.793  | -0.026 | 0.259  | 0.212  | 0.047  |
| -2.137 | -1.640 | 0.217  | -0.333 | 0.550  |
| 1.109  | 1.501  | 0.527  | -0.355 | 0.882  |
| 1.532  | 1.598  | 0.104  | -0.606 | 0.710  |
| -0.735 | -0.812 | -0.154 | -0.590 | 0.435  |
| -2.450 | -2.003 | 0.136  | -1.039 | 1.175  |
| 0.953  | 1.231  | 0.014  | -0.133 | 0.147  |
| -3.312 | -2.819 | 0.067  | -0.856 | 0.923  |
| 0.973  | 0.903  | 0.603  | 0.421  | 0.182  |
| -0.046 | 1.081  | -0.365 | -0.533 | 0.167  |
| 2.830  | 1.648  | 0.036  | 0.044  | -0.008 |
| 1.096  | 1.440  | -0.023 | -0.273 | 0.249  |
| -2.419 | -2.653 | 0.441  | -0.547 | 0.988  |
| -3.072 | -3.102 | -0.369 | 0.141  | -0.510 |
| -1.004 | -1.508 | 0.694  | -0.057 | 0.751  |
| -0.871 | -1.689 | 0.068  | 0.269  | -0.201 |
| 0.919  | 1.917  | -0.773 | -0.680 | -0.093 |
| 2.069  | 1.147  | 0.432  | 0.201  | 0.231  |
| -0.743 | -0.493 | 0.045  | 0.337  | -0.292 |
| -0.700 | -1.327 | 0.150  | 0.679  | -0.529 |
| -1.805 | -1.914 | 0.049  | 0.453  | -0.404 |
| 0.288  | -1.384 | -0.509 | -0.386 | -0.123 |
| 0.031  | -0.203 | -0.044 | 0.434  | -0.478 |
| -1.072 | -1.024 | -0.028 | -0.120 | 0.092  |
| 1.796  | 2.194  | 0.232  | -0.416 | 0.649  |
| 1.544  | 0.610  | -0.747 | -0.172 | -0.575 |
| 1.534  | 0.105  | 0.350  | 0.447  | -0.097 |
| 0.711  | 0.612  | -0.360 | 0.097  | -0.457 |
| 1.087  | 1.606  | -0.428 | -0.324 | -0.104 |
| -0.097 | 0.447  | 1.526  | -0.241 | 1.767  |
| 1.438  | 1.257  | -0.420 | -0.325 | -0.095 |
| 2.486  | 1.400  | 0.021  | 0.059  | -0.039 |
| 0.937  | 0.248  | 0.539  | -0.371 | 0.910  |
| 0.984  | 1.056  | -0.310 | -0.252 | -0.058 |
| 0.471  | 0.968  | -0.361 | -0.312 | -0.048 |
| 1.259  | 1.653  | 0.769  | 0.065  | 0.704  |
| 1.381  | 0.251  | 0.029  | 0.305  | -0.277 |
| 1.866  | 0.967  | -0.698 | -0.307 | -0.390 |
| -0.410 | -0.383 | -0.263 | -0.213 | -0.050 |
| -0.144 | -0.924 | -0.299 | -0.194 | -0.105 |
| -0.330 | 0.104  | 0.055  | -0.214 | 0.269  |
| 0.954  | 0.086  | -0.672 | -0.249 | -0.422 |
| 0.530  | -0.048 | -1.288 | -0.181 | -1.107 |
| 1.038  | 0.369  | 0.227  | 0.661  | -0.433 |
| 1.036  | 1.077  | -0.303 | -0.003 | -0.300 |
| 0.257  | 1.038  | -0.183 | -0.307 | 0.124  |
| 0.510  | 0.339  | -0.119 | -0.129 | 0.010  |
| 0.693  | 0.587  | 0.335  | 0.092  | 0.243  |
| -2.473 | -2.073 | -0.473 | -1.533 | 1.060  |
| 1.539  | 1.731  | 0.190  | -0.211 | 0.401  |
| 0.208  | 0.044  | 0.313  | -0.169 | 0.482  |

|        |        |        |        |        |
|--------|--------|--------|--------|--------|
| 0.980  | 1.298  | 0.301  | 0.217  | 0.084  |
| 0.800  | 0.506  | -0.007 | 0.099  | -0.105 |
| 0.642  | 0.870  | -0.593 | -0.564 | -0.029 |
| -2.612 | -1.691 | 0.143  | -0.206 | 0.349  |
| -2.020 | -1.323 | -0.117 | -0.321 | 0.205  |
| -2.233 | -1.793 | -0.316 | -0.670 | 0.355  |
| 0.375  | -0.056 | 0.381  | 0.138  | 0.243  |
| -0.206 | -0.179 | 0.030  | 0.184  | -0.154 |
| -1.164 | -0.782 | 0.328  | 0.006  | 0.322  |
| -0.699 | -0.968 | 0.099  | 0.242  | -0.143 |
| 0.719  | -0.194 | 0.183  | -0.283 | 0.466  |
| 0.330  | 0.166  | 0.457  | 0.063  | 0.394  |
| 0.483  | 0.854  | -0.241 | -0.409 | 0.168  |
| 0.201  | 0.227  | 0.115  | -0.111 | 0.226  |
| 0.335  | 0.118  | 0.537  | -0.168 | 0.706  |
| -2.054 | -1.281 | 0.071  | -0.711 | 0.782  |
| -1.397 | -0.096 | 0.335  | -0.426 | 0.762  |
| 1.052  | -0.043 | -0.161 | -0.004 | -0.157 |
| 0.238  | 0.366  | 0.247  | -0.334 | 0.581  |
| -1.211 | -1.292 | -0.107 | -0.419 | 0.313  |
| 1.925  | 3.494  | -0.389 | -0.533 | 0.144  |
| 1.649  | 2.040  | -0.272 | -0.444 | 0.172  |
| -1.034 | -0.975 | 0.298  | -0.067 | 0.365  |
| 1.826  | 1.661  | -0.366 | -0.197 | -0.169 |
| 1.157  | 0.034  | -0.215 | -0.763 | 0.548  |
| -0.160 | -0.341 | 0.569  | 0.019  | 0.550  |
| 2.120  | 0.138  | 0.267  | 0.123  | 0.144  |
| 1.771  | 1.792  | -0.319 | -0.850 | 0.531  |
| 1.246  | 1.248  | -0.120 | 0.201  | -0.321 |
| -2.220 | -1.571 | 0.185  | -0.712 | 0.897  |
| -0.934 | -0.909 | -0.074 | -0.230 | 0.156  |
| -0.389 | -2.028 | -0.519 | -0.338 | -0.180 |
| -0.896 | -0.585 | 0.296  | -0.226 | 0.522  |
| 1.562  | 1.469  | -0.288 | -0.564 | 0.277  |
| 0.214  | 0.572  | 0.246  | -0.172 | 0.418  |
| 0.217  | 0.194  | 0.110  | 0.520  | -0.411 |
| -0.482 | -1.102 | 0.026  | 0.610  | -0.584 |
| -0.897 | -0.260 | -0.462 | -0.421 | -0.041 |
| 0.407  | 0.552  | 0.339  | -0.346 | 0.685  |
| 3.213  | 1.446  | -0.200 | -0.011 | -0.189 |
| -2.068 | -1.684 | 0.132  | -0.181 | 0.313  |
| -0.211 | -0.096 | 0.029  | -0.935 | 0.964  |
| 0.400  | 0.333  | -0.215 | -0.164 | -0.051 |
| -0.742 | 0.025  | -0.159 | 0.141  | -0.299 |
| -2.104 | -1.488 | 0.020  | -0.465 | 0.485  |
| -1.551 | -1.137 | -0.412 | -0.168 | -0.244 |
| -0.017 | 1.130  | -0.172 | -0.303 | 0.130  |
| 0.162  | 0.876  | -0.773 | 0.055  | -0.828 |
| -0.578 | -0.124 | -0.137 | -0.390 | 0.253  |
| 0.534  | -0.256 | -0.219 | -0.529 | 0.310  |
| 1.500  | 0.947  | -0.083 | 0.552  | -0.635 |



|        |        |        |        |        |
|--------|--------|--------|--------|--------|
| -2.656 | -2.026 | 0.153  | -1.022 | 1.175  |
| 1.251  | 1.534  | 0.319  | -0.017 | 0.336  |
| -0.746 | -0.266 | 0.364  | -0.124 | 0.489  |
| 3.359  | 2.239  | -0.317 | 0.088  | -0.405 |
| 0.402  | -0.310 | -0.073 | 0.030  | -0.103 |
| 1.983  | 0.839  | 0.164  | -0.029 | 0.192  |
| 0.392  | -1.153 | -0.829 | -0.622 | -0.207 |
| -0.527 | -1.680 | -0.082 | 0.180  | -0.263 |
| 0.185  | 0.046  | -0.107 | -0.153 | 0.046  |
| 1.917  | 1.786  | 0.104  | 0.096  | 0.009  |
| 3.431  | 2.104  | -0.214 | -0.185 | -0.029 |
| 0.001  | -0.253 | -0.234 | 0.386  | -0.620 |
| 0.079  | -0.007 | -0.209 | -0.463 | 0.253  |
| 0.930  | -0.701 | -0.213 | -0.033 | -0.180 |
| 0.222  | 0.706  | 0.519  | -0.205 | 0.725  |
| 1.417  | 0.469  | 0.602  | 0.339  | 0.263  |
| -2.344 | -2.009 | -0.196 | -0.145 | -0.051 |
| 0.373  | 0.597  | -0.413 | -0.196 | -0.217 |
| 1.291  | 1.212  | 0.000  | -0.078 | 0.078  |
| 1.466  | 0.775  | -0.411 | -0.009 | -0.402 |
| 1.270  | 1.935  | -0.168 | 0.000  | -0.168 |
| -0.380 | 0.111  | 0.026  | -0.351 | 0.378  |
| 0.642  | -0.044 | -0.149 | -0.287 | 0.138  |
| 0.609  | 0.744  | -0.341 | -0.440 | 0.099  |
| 1.704  | 2.003  | -0.089 | 0.158  | -0.247 |
| 1.246  | 0.890  | -0.247 | -0.031 | -0.216 |
| 0.329  | 0.540  | 0.604  | -0.231 | 0.835  |
| -0.913 | -1.073 | -0.414 | -0.192 | -0.222 |
| 0.762  | -0.582 | -0.123 | -0.003 | -0.120 |
| 1.085  | 0.952  | -0.099 | -0.596 | 0.496  |
| -0.164 | 0.053  | 0.273  | -0.075 | 0.348  |
| -0.974 | -1.721 | 0.067  | -0.087 | 0.154  |
| 1.219  | 1.232  | -0.020 | -0.576 | 0.556  |
| 2.461  | 1.752  | -0.052 | -0.157 | 0.105  |
| -1.335 | -1.104 | -0.699 | -0.461 | -0.238 |
| 0.887  | -0.179 | -0.663 | -0.038 | -0.625 |
| 0.517  | 0.990  | -0.176 | 0.243  | -0.419 |
| 1.508  | 0.076  | -0.262 | -0.049 | -0.213 |
| -1.270 | -1.564 | 0.107  | 0.081  | 0.026  |
| -0.447 | -0.072 | -0.095 | 0.307  | -0.402 |
| -0.818 | -1.312 | 0.284  | 0.050  | 0.234  |
| -2.279 | -2.003 | -0.873 | -0.383 | -0.489 |
| 1.896  | 0.664  | -0.241 | 0.141  | -0.381 |
| 1.005  | 0.796  | -0.399 | -0.759 | 0.360  |
| -1.840 | -0.793 | -0.237 | -0.724 | 0.487  |
| 1.690  | 0.627  | -0.206 | 0.131  | -0.337 |
| 0.159  | 1.191  | 0.441  | -0.627 | 1.068  |
| 0.646  | -0.525 | -0.174 | 0.764  | -0.938 |
| 0.461  | 1.081  | -0.242 | -0.434 | 0.192  |
| -0.482 | -1.436 | -0.388 | 0.106  | -0.494 |
| 1.586  | 0.612  | -0.897 | -0.478 | -0.419 |

|        |        |        |        |        |
|--------|--------|--------|--------|--------|
| -1.191 | -0.681 | -0.652 | -0.596 | -0.055 |
| 0.125  | 0.370  | -0.142 | -0.298 | 0.156  |
| 2.167  | 0.996  | -0.027 | -0.043 | 0.015  |
| -0.092 | 0.010  | -0.511 | -0.483 | -0.028 |
| -0.697 | -0.343 | 0.027  | -0.585 | 0.612  |
| 0.186  | 0.558  | 0.384  | 0.284  | 0.100  |
| 0.445  | -0.400 | -0.871 | -0.117 | -0.754 |
| -1.074 | -0.731 | 0.145  | -0.214 | 0.359  |
| 0.171  | 0.203  | 0.965  | 0.007  | 0.958  |
| 1.243  | 1.606  | 0.113  | -0.377 | 0.490  |
| -0.550 | -0.652 | -0.432 | -0.453 | 0.021  |
| -0.922 | -0.397 | 0.462  | -0.417 | 0.879  |
| -0.216 | -0.848 | 0.485  | 0.099  | 0.386  |
| -2.005 | -1.495 | 0.139  | 0.009  | 0.130  |
| 2.141  | 0.205  | -0.460 | 0.164  | -0.624 |
| -1.929 | -1.476 | 0.102  | -0.531 | 0.633  |
| -0.909 | -0.561 | -0.117 | -0.495 | 0.378  |
| 2.496  | 1.246  | -0.314 | 0.342  | -0.656 |
| -0.444 | -0.432 | -0.375 | -0.256 | -0.119 |
| 0.604  | -0.240 | -0.236 | -0.208 | -0.029 |
| -1.016 | -0.767 | -0.780 | 0.123  | -0.903 |
| -1.700 | -0.549 | -1.029 | 0.002  | -1.031 |
| -1.639 | -0.796 | -1.904 | -0.974 | -0.930 |
| 1.223  | 1.181  | -0.412 | 0.012  | -0.424 |
| 1.049  | -0.466 | 0.029  | -0.206 | 0.235  |
| 1.152  | -0.094 | -0.400 | 0.246  | -0.646 |
| 0.575  | 1.750  | -0.819 | -0.672 | -0.147 |
| 1.019  | 0.594  | -0.341 | 0.005  | -0.347 |
| -0.517 | -0.579 | 0.077  | -0.698 | 0.775  |
| -0.927 | 0.611  | -0.302 | 0.276  | -0.578 |
| 1.017  | 1.415  | 0.596  | -0.155 | 0.751  |
| 0.214  | 0.374  | 0.188  | -0.368 | 0.557  |
| -1.525 | 0.500  | -0.297 | -0.917 | 0.619  |
| 1.284  | 0.608  | -0.751 | 0.184  | -0.935 |
| 1.078  | 1.269  | -0.282 | -0.162 | -0.120 |
| 0.564  | 0.880  | -0.617 | -0.206 | -0.411 |
| -0.364 | 0.097  | -0.483 | -0.600 | 0.118  |
| 2.714  | 1.290  | 0.303  | 0.564  | -0.261 |
| 2.430  | 1.946  | 0.698  | 0.659  | 0.039  |
| -4.515 | -3.849 | 0.022  | -1.054 | 1.076  |
| -0.539 | -0.192 | -0.337 | 0.330  | -0.667 |
| 1.460  | 0.351  | -0.323 | 0.078  | -0.401 |
| -1.078 | -0.756 | 0.482  | -0.963 | 1.445  |
| -1.726 | -2.126 | 0.227  | 0.030  | 0.197  |
| -3.882 | -3.465 | 0.058  | -0.259 | 0.317  |
| -1.766 | -0.871 | 0.104  | 0.533  | -0.428 |
| -2.891 | -2.802 | 0.172  | -0.037 | 0.208  |
| 1.087  | 1.403  | 0.314  | 0.246  | 0.068  |
| 2.367  | 1.666  | 0.315  | 0.229  | 0.086  |
| 1.172  | -0.095 | 0.033  | 0.122  | -0.089 |
| 1.838  | 2.308  | 0.268  | 0.184  | 0.084  |

|        |        |        |        |        |
|--------|--------|--------|--------|--------|
| 1.617  | 0.722  | 0.036  | 0.151  | -0.115 |
| 2.479  | 0.905  | 0.061  | 0.227  | -0.165 |
| 1.718  | 2.111  | 0.267  | -0.462 | 0.730  |
| 2.058  | 1.700  | -0.382 | -0.296 | -0.086 |
| 0.959  | 1.517  | -0.546 | -0.461 | -0.085 |
| 0.114  | -0.050 | -0.027 | -0.038 | 0.011  |
| -0.897 | -0.837 | -0.064 | -0.319 | 0.255  |
| 0.694  | 0.403  | -0.120 | 0.533  | -0.653 |
| -0.557 | -0.723 | -0.181 | 0.073  | -0.254 |
| -1.966 | -0.665 | 0.024  | 0.225  | -0.201 |
| 0.031  | -0.953 | 0.027  | 0.405  | -0.378 |
| 0.718  | -0.720 | 0.107  | 0.142  | -0.034 |
| 0.649  | 0.183  | 0.030  | 0.043  | -0.013 |
| -2.966 | -2.238 | -0.104 | -0.426 | 0.322  |
| -0.747 | -0.620 | -0.500 | 0.374  | -0.874 |
| -1.736 | -1.090 | -0.199 | 0.214  | -0.414 |
| -1.580 | -1.540 | 0.451  | -0.020 | 0.472  |
| -1.759 | -1.356 | -0.250 | -0.011 | -0.239 |
| -2.026 | -1.519 | 0.402  | -0.198 | 0.600  |
| -3.776 | -3.622 | 0.097  | 1.044  | -0.947 |
| -1.148 | -0.094 | 0.440  | 0.877  | -0.437 |
| -1.133 | -1.084 | 0.316  | 0.987  | -0.671 |
| -2.196 | -1.453 | 0.499  | 0.855  | -0.356 |
| -1.901 | -1.218 | 0.138  | 0.549  | -0.411 |
| -1.421 | -1.528 | 0.259  | 0.357  | -0.098 |
| -1.263 | -1.395 | 0.331  | 0.479  | -0.149 |
| 1.083  | 0.168  | 0.233  | 0.591  | -0.358 |
| 2.264  | 2.491  | 0.310  | 0.063  | 0.248  |
| 1.960  | 1.625  | 0.324  | 0.105  | 0.219  |
| 2.467  | 2.312  | 0.086  | 0.524  | -0.438 |
| 1.737  | 1.291  | 0.074  | -0.046 | 0.120  |
| 1.405  | 0.489  | 0.029  | 0.087  | -0.058 |
| 1.340  | 0.687  | -0.003 | 0.314  | -0.317 |
| -1.105 | -0.611 | 0.319  | 0.022  | 0.296  |
| 0.111  | 0.890  | 0.599  | 0.252  | 0.347  |
| -0.623 | -0.274 | -0.400 | 0.096  | -0.496 |
| 3.173  | 2.558  | 0.343  | 0.182  | 0.161  |
| -1.774 | -1.166 | 0.263  | 0.101  | 0.162  |
| -1.351 | -1.009 | -0.173 | -0.195 | 0.021  |
| -1.022 | 0.658  | -0.379 | 0.277  | -0.656 |
| -1.502 | -0.471 | -0.105 | -0.589 | 0.484  |
| 1.270  | 1.534  | -0.134 | -0.348 | 0.214  |
| -1.932 | -1.152 | 0.613  | -0.298 | 0.911  |
| 0.738  | 0.926  | -1.041 | -0.029 | -1.012 |
| -0.852 | -0.681 | -0.668 | -0.537 | -0.130 |
| -2.922 | -2.686 | 0.287  | 0.867  | -0.580 |
| -1.168 | -0.476 | 0.021  | -0.296 | 0.317  |
| -0.426 | -0.889 | 0.301  | 0.127  | 0.175  |
| 0.888  | 0.962  | 0.195  | -0.046 | 0.241  |
| 1.150  | 1.075  | 0.563  | 0.175  | 0.388  |
| 1.429  | 0.373  | 0.475  | 0.056  | 0.420  |

|        |        |        |        |        |
|--------|--------|--------|--------|--------|
| -0.349 | -0.723 | 0.287  | 0.015  | 0.272  |
| -1.192 | -0.818 | 0.034  | -0.261 | 0.295  |
| 1.441  | 1.477  | 0.346  | 0.184  | 0.162  |
| -0.924 | -0.551 | 0.286  | -0.222 | 0.508  |
| -0.232 | 0.408  | 0.023  | -0.734 | 0.757  |
| -1.966 | -2.438 | -1.735 | -1.004 | -0.731 |
| -0.919 | -1.222 | -0.315 | -0.241 | -0.074 |
| -0.773 | -0.792 | 0.574  | -0.036 | 0.610  |
| 1.371  | 1.532  | 0.278  | -0.158 | 0.436  |
| -2.371 | -2.930 | 0.250  | -0.144 | 0.394  |
| -1.693 | -1.370 | 0.580  | -1.039 | 1.620  |
| -0.373 | -0.991 | 0.347  | -0.127 | 0.474  |
| -0.088 | 0.395  | 0.462  | -0.194 | 0.656  |
| 0.117  | 0.690  | -0.023 | -0.148 | 0.125  |
| -0.994 | -1.172 | 0.033  | -0.129 | 0.162  |
| -1.042 | -0.800 | -0.167 | 0.076  | -0.243 |
| -2.277 | -1.794 | 0.030  | -0.047 | 0.077  |
| -2.847 | -2.606 | 0.264  | -0.409 | 0.673  |
| -1.061 | -1.548 | 0.473  | -0.449 | 0.922  |
| -1.348 | -1.070 | 0.244  | -0.419 | 0.663  |
| -2.661 | -1.601 | 0.273  | -1.118 | 1.391  |
| -3.095 | -2.733 | -0.219 | -0.643 | 0.424  |
| -3.386 | -2.945 | 0.473  | -0.924 | 1.397  |
| -3.684 | -3.166 | -0.270 | -0.788 | 0.518  |
| -2.868 | -2.821 | -0.254 | -1.696 | 1.442  |
| -4.217 | -2.707 | 0.535  | -2.285 | 2.820  |
| 1.894  | 1.801  | 0.394  | 0.154  | 0.240  |
| 2.852  | 1.945  | 0.049  | 0.312  | -0.263 |
| 0.258  | 0.539  | 0.231  | 0.842  | -0.611 |
| -0.884 | -0.189 | 0.346  | -0.505 | 0.851  |
| -3.135 | -3.338 | 0.217  | 0.177  | 0.040  |
| 0.940  | 1.768  | 0.762  | -0.020 | 0.782  |
| -1.150 | -1.257 | -0.004 | -0.019 | 0.016  |
| -2.812 | -3.538 | -0.232 | -0.354 | 0.123  |
| -2.107 | -1.117 | 0.019  | 0.105  | -0.086 |
| -2.548 | -1.857 | -0.335 | -0.190 | -0.145 |
| -2.661 | -2.219 | -0.141 | 0.321  | -0.461 |
| -3.178 | -2.879 | 0.088  | -0.308 | 0.396  |
| -2.698 | -2.669 | 0.321  | 0.344  | -0.023 |
| -2.954 | -2.565 | -0.553 | 0.301  | -0.854 |
| -3.308 | -2.919 | 0.187  | 0.052  | 0.135  |
| -3.048 | -2.473 | -0.180 | -0.054 | -0.127 |
| -2.431 | -1.443 | 0.452  | 0.035  | 0.416  |
| -3.627 | -2.977 | 0.708  | 0.414  | 0.295  |
| -4.489 | -3.206 | 0.250  | -0.076 | 0.326  |
| -4.048 | -3.562 | 0.146  | 0.039  | 0.107  |
| -1.263 | -0.670 | -0.348 | -0.659 | 0.311  |
| 0.560  | 0.318  | -0.225 | 0.033  | -0.259 |
| 1.027  | 0.121  | 0.061  | -0.377 | 0.439  |
| 0.208  | 0.313  | 0.186  | -0.118 | 0.304  |
| -3.206 | -3.201 | 0.149  | 0.408  | -0.259 |

|        |        |        |        |        |
|--------|--------|--------|--------|--------|
| -1.173 | -1.101 | -0.299 | -0.091 | -0.207 |
| -1.606 | -1.948 | 0.070  | -0.143 | 0.213  |
| -0.984 | -0.872 | 0.265  | -0.250 | 0.515  |
| -1.884 | -1.955 | 0.303  | -0.232 | 0.535  |
| 1.956  | 0.813  | 0.453  | 0.110  | 0.344  |
| -0.053 | -1.063 | 0.068  | 0.136  | -0.068 |
| -2.108 | -1.774 | -0.580 | -0.470 | -0.110 |
| 1.500  | 0.995  | 0.078  | 0.238  | -0.159 |
| 2.117  | 1.552  | 0.036  | 0.034  | 0.002  |
| -2.784 | -3.093 | 0.052  | 0.277  | -0.225 |
| 1.111  | 1.118  | 0.233  | -0.759 | 0.991  |
| 0.178  | -0.150 | 0.489  | 0.102  | 0.386  |
| 0.621  | -0.317 | -0.059 | 0.267  | -0.326 |
| -1.682 | -1.287 | 0.144  | -0.345 | 0.489  |
| -2.817 | -2.846 | 0.191  | 0.036  | 0.155  |
| 1.408  | 0.775  | 0.358  | 0.003  | 0.356  |
| 1.616  | 2.024  | 0.370  | 0.450  | -0.080 |
| -1.392 | -2.154 | 0.072  | 0.089  | -0.018 |
| -0.858 | -0.991 | 0.213  | 0.418  | -0.205 |
| -1.608 | -2.729 | 0.103  | 0.259  | -0.155 |
| -1.585 | -0.789 | 0.402  | -0.072 | 0.474  |
| -0.751 | -0.927 | -0.392 | -0.184 | -0.209 |
| 0.233  | -0.559 | -0.825 | -0.352 | -0.474 |
| 2.577  | 1.805  | 0.648  | -0.043 | 0.691  |
| 2.230  | 2.405  | -0.296 | -0.546 | 0.250  |
| 1.542  | 0.502  | -0.105 | 0.116  | -0.221 |
| 2.933  | 1.785  | 0.433  | 0.579  | -0.146 |
| -0.033 | 0.235  | 0.040  | 0.185  | -0.145 |
| -3.392 | -2.840 | 0.047  | -0.071 | 0.118  |
| -0.546 | -0.553 | 0.069  | -0.362 | 0.432  |
| 0.539  | 0.888  | 0.782  | 0.426  | 0.356  |
| 1.893  | 1.814  | 0.044  | 0.114  | -0.071 |
| -0.139 | 0.083  | -0.534 | -0.707 | 0.173  |
| 2.815  | 2.049  | 0.071  | 0.736  | -0.664 |
| -0.127 | -0.427 | -1.246 | -0.542 | -0.704 |
| -3.248 | -1.437 | -0.084 | -0.893 | 0.809  |
| -0.819 | -1.139 | 0.001  | 0.364  | -0.363 |
| -0.325 | -0.646 | -0.255 | 0.424  | -0.679 |
| 0.674  | 0.240  | 0.544  | 0.576  | -0.032 |
| 0.514  | -0.382 | 0.306  | 0.076  | 0.231  |
| 2.135  | 1.383  | 0.512  | 0.268  | 0.244  |
| 0.948  | 1.388  | 0.036  | -0.826 | 0.862  |
| 0.022  | 0.837  | -0.223 | -0.282 | 0.058  |
| 2.584  | 1.760  | -0.556 | -0.302 | -0.253 |
| 0.249  | 0.893  | -1.081 | -0.453 | -0.628 |
| 1.692  | 1.317  | -0.206 | 0.185  | -0.391 |
| -1.224 | -1.253 | -1.172 | -0.659 | -0.513 |
| -0.363 | 1.514  | -0.161 | -0.011 | -0.150 |
| 3.240  | 1.944  | 0.294  | 0.639  | -0.345 |
| 2.396  | 1.157  | 0.754  | 0.397  | 0.357  |
| -2.505 | -1.881 | 0.655  | 0.007  | 0.648  |

|        |        |        |        |        |
|--------|--------|--------|--------|--------|
| -0.511 | -0.903 | 0.623  | -0.108 | 0.731  |
| -0.429 | -0.745 | 0.485  | -0.280 | 0.764  |
| 0.871  | 0.849  | 0.395  | 0.128  | 0.267  |
| -2.980 | -2.238 | -0.049 | 0.038  | -0.088 |
| 0.494  | -0.136 | 0.126  | 0.340  | -0.214 |
| 0.973  | -0.676 | -0.702 | -0.527 | -0.175 |
| 2.097  | 1.534  | 0.010  | 0.126  | -0.117 |
| -1.832 | -1.753 | 1.491  | 0.391  | 1.101  |
| 1.919  | 2.537  | -0.415 | -0.687 | 0.272  |
| -1.279 | -0.850 | 0.600  | -0.145 | 0.745  |
| -2.553 | -1.805 | 1.050  | 0.292  | 0.758  |
| 0.424  | 1.039  | 0.781  | -0.179 | 0.960  |
| 0.569  | -0.082 | -0.075 | -0.213 | 0.138  |
| 1.110  | 0.645  | 0.249  | -0.600 | 0.849  |
| 1.237  | 0.910  | 0.952  | -0.081 | 1.033  |
| 0.289  | 0.386  | 0.496  | 0.301  | 0.195  |
| -1.267 | -1.476 | -1.010 | 0.155  | -1.165 |
| 0.864  | 0.987  | 0.211  | -0.153 | 0.364  |
| -2.171 | -1.965 | 0.170  | -0.806 | 0.976  |
| -3.469 | -2.624 | -0.407 | 0.047  | -0.453 |
| -2.802 | -2.197 | -0.394 | 0.491  | -0.885 |
| -1.832 | -2.826 | -0.153 | -0.532 | 0.379  |
| 1.094  | 0.768  | 0.117  | -0.202 | 0.319  |
| 0.945  | 0.786  | 0.530  | 0.331  | 0.199  |
| 0.758  | 1.887  | 0.105  | 0.257  | -0.152 |
| 1.376  | 0.565  | 0.114  | 0.224  | -0.110 |
| 1.675  | 1.166  | 0.639  | 0.578  | 0.061  |
| -1.363 | -1.388 | 0.093  | -0.391 | 0.484  |
| 0.567  | 0.917  | 0.380  | -0.062 | 0.443  |
| -0.219 | 0.171  | 0.450  | -0.588 | 1.039  |
| -0.501 | 0.104  | 0.521  | -0.188 | 0.709  |
| 0.595  | -0.204 | 0.710  | 0.324  | 0.386  |
| 2.143  | 1.035  | 0.201  | 0.100  | 0.101  |
| 0.560  | 0.959  | 0.325  | -0.251 | 0.575  |
| 1.409  | 1.546  | 0.087  | 0.261  | -0.174 |
| 2.497  | 1.531  | 0.334  | -0.141 | 0.476  |
| -3.232 | -2.387 | -0.344 | -0.485 | 0.142  |
| 1.694  | 0.686  | 0.344  | 0.349  | -0.005 |
| -0.686 | -0.469 | -0.098 | -0.454 | 0.356  |
| -2.774 | -2.219 | -0.782 | -0.923 | 0.141  |
| 1.645  | 1.006  | 0.370  | 0.495  | -0.125 |
| 1.047  | 0.091  | 0.046  | 0.903  | -0.858 |
| 0.201  | 0.741  | 0.546  | -0.083 | 0.628  |
| 1.136  | 2.243  | 0.177  | -0.022 | 0.199  |
| -0.309 | 0.085  | -0.160 | -0.184 | 0.024  |
| 1.724  | 0.275  | 0.218  | 0.332  | -0.114 |
| 1.896  | 1.999  | -0.271 | -0.413 | 0.142  |
| 2.855  | 2.309  | 0.196  | -0.559 | 0.755  |
| -2.299 | -0.388 | -0.378 | -0.506 | 0.128  |
| -1.621 | -1.440 | -0.207 | -0.081 | -0.127 |
| -1.959 | -1.989 | 0.135  | -0.147 | 0.282  |

|        |        |        |        |        |
|--------|--------|--------|--------|--------|
| 2.069  | 2.250  | -0.568 | -0.417 | -0.151 |
| 1.555  | 1.831  | -0.022 | -0.377 | 0.355  |
| -0.764 | -0.181 | 0.179  | -0.485 | 0.664  |
| 0.262  | 0.795  | 0.245  | 0.786  | -0.541 |
| 1.086  | 0.994  | 0.594  | 1.219  | -0.624 |
| 0.035  | 0.506  | -0.317 | 0.535  | -0.852 |
| -0.171 | -0.837 | -0.301 | -0.144 | -0.157 |
| 0.410  | 0.224  | -0.032 | 0.063  | -0.094 |
| -1.318 | -1.449 | 0.028  | -0.470 | 0.498  |
| 1.466  | 0.260  | -0.043 | 0.247  | -0.290 |
| 1.677  | 0.919  | 0.333  | 0.446  | -0.112 |
| -1.036 | -0.905 | 0.464  | -0.206 | 0.670  |
| -1.733 | -1.530 | -0.557 | -0.400 | -0.157 |
| -0.420 | -0.114 | 0.031  | -0.482 | 0.513  |
| 0.638  | -0.121 | 0.377  | 0.287  | 0.090  |
| -0.067 | 0.732  | 0.129  | -0.327 | 0.456  |
| 0.688  | 1.834  | 0.153  | 0.334  | -0.182 |
| -1.328 | -1.374 | -0.392 | 0.054  | -0.446 |
| -1.336 | -1.202 | 0.430  | 0.472  | -0.042 |
| -1.492 | -0.819 | 0.375  | -0.137 | 0.512  |
| -1.689 | -1.414 | -0.128 | -0.283 | 0.155  |
| 0.383  | 0.490  | 0.232  | 0.752  | -0.520 |
| -1.713 | -2.399 | -0.045 | 0.107  | -0.152 |
| -1.417 | -0.733 | 0.050  | -0.047 | 0.096  |
| 0.902  | 0.293  | 0.414  | 0.685  | -0.271 |
| 0.626  | 0.392  | -0.219 | -0.377 | 0.158  |
| 1.083  | 0.845  | 0.022  | 0.172  | -0.150 |
| -1.670 | -2.180 | -0.194 | -0.845 | 0.651  |
| -2.367 | -2.214 | 0.384  | -0.529 | 0.914  |
| -2.433 | 0.656  | -0.332 | -0.887 | 0.555  |
| -3.888 | -3.297 | 0.002  | 0.359  | -0.356 |
| 0.526  | 0.675  | 0.312  | 0.260  | 0.052  |
| -2.260 | -2.228 | 0.115  | 0.284  | -0.169 |
| -0.078 | 0.124  | 0.025  | -0.073 | 0.099  |
| -0.805 | -1.807 | -0.011 | 0.774  | -0.785 |
| -2.639 | -2.792 | 0.121  | 0.379  | -0.258 |
| 0.454  | -0.388 | -0.284 | -0.044 | -0.240 |
| 0.555  | -0.207 | 0.436  | 0.988  | -0.552 |
| -2.034 | -1.338 | -0.312 | -0.351 | 0.039  |
| -2.017 | -2.038 | -0.082 | -0.100 | 0.018  |
| -0.778 | -0.785 | -0.188 | 0.223  | -0.410 |
| 0.181  | -0.001 | 0.335  | 0.254  | 0.081  |
| 1.786  | 1.843  | 0.555  | -0.214 | 0.769  |
| -3.130 | -2.077 | 0.373  | 0.029  | 0.344  |
| -0.052 | 2.105  | -0.240 | -0.123 | -0.117 |
| 0.162  | 1.039  | -0.062 | -0.715 | 0.653  |
| -2.009 | -1.330 | -0.074 | 0.382  | -0.456 |
| -1.213 | -1.925 | 0.122  | 0.594  | -0.472 |
| -1.181 | -1.805 | 0.197  | 0.386  | -0.189 |
| -1.524 | -1.841 | -0.214 | 0.413  | -0.627 |
| -1.093 | -0.825 | -0.172 | 0.416  | -0.589 |

|        |        |        |        |        |
|--------|--------|--------|--------|--------|
| -1.820 | -2.179 | 0.327  | 0.350  | -0.023 |
| -1.227 | 0.794  | 0.193  | -0.125 | 0.318  |
| -0.746 | -0.804 | 0.202  | -0.192 | 0.394  |
| -0.503 | -0.857 | 0.360  | 0.419  | -0.059 |
| -1.801 | -1.772 | 0.036  | -0.126 | 0.162  |
| 1.237  | 1.125  | 0.130  | 0.222  | -0.092 |
| -2.116 | -1.632 | 0.014  | -0.610 | 0.623  |
| 2.447  | 2.149  | -0.076 | -0.315 | 0.238  |
| 0.529  | 0.050  | -0.411 | 0.279  | -0.690 |
| 1.270  | 0.654  | -0.034 | -0.111 | 0.077  |
| -0.579 | -0.317 | 0.548  | -0.065 | 0.613  |
| -4.459 | -3.942 | 0.483  | 1.527  | -1.044 |
| -3.962 | -3.528 | 0.194  | -0.018 | 0.212  |
| -1.544 | -0.231 | 0.102  | 0.369  | -0.266 |
| -0.688 | 0.844  | 0.120  | -0.538 | 0.658  |
| 2.823  | 1.265  | 0.198  | 0.442  | -0.243 |
| 0.957  | 1.070  | -0.223 | -0.170 | -0.053 |
| 1.754  | 1.258  | 0.342  | 0.574  | -0.232 |
| -1.129 | -0.146 | 0.039  | -0.254 | 0.293  |
| -2.524 | -2.046 | 0.138  | -0.738 | 0.877  |
| -1.692 | -2.547 | -0.111 | -0.027 | -0.084 |
| -1.074 | -0.715 | -0.144 | -0.408 | 0.263  |
| -1.993 | -2.599 | -0.496 | -0.317 | -0.179 |
| -3.340 | -2.653 | -0.182 | -0.515 | 0.333  |
| -1.262 | -0.924 | 0.370  | 0.226  | 0.144  |
| -2.163 | -1.573 | 0.050  | -0.612 | 0.662  |
| -0.004 | 0.136  | 0.391  | -0.395 | 0.786  |
| -0.759 | -1.783 | 0.610  | 0.454  | 0.157  |
| 1.789  | 1.732  | 0.267  | -0.337 | 0.605  |
| 0.332  | 0.895  | 0.139  | -0.656 | 0.795  |
| -2.291 | -1.948 | 0.364  | -0.081 | 0.445  |
| -0.939 | -0.570 | -0.464 | -0.347 | -0.118 |
| 1.545  | 1.421  | 0.169  | 0.113  | 0.056  |
| -0.291 | 0.193  | -0.305 | -0.400 | 0.095  |
| -1.245 | -0.810 | -0.005 | 0.086  | -0.092 |
| -1.877 | -1.974 | -0.319 | 0.247  | -0.566 |
| -1.594 | -1.682 | 0.240  | -0.258 | 0.498  |
| -0.373 | -0.194 | 0.105  | -0.017 | 0.122  |
| 0.800  | -0.492 | 0.175  | 0.490  | -0.315 |
| 0.259  | -0.728 | 0.158  | 0.449  | -0.291 |
| -1.668 | -1.096 | 0.447  | 0.956  | -0.510 |
| -1.297 | -1.139 | -0.269 | -0.400 | 0.131  |
| 0.721  | 1.426  | 0.249  | 0.209  | 0.040  |
| -0.233 | -1.351 | -0.345 | -0.161 | -0.184 |
| -1.979 | -1.946 | 0.377  | -0.102 | 0.479  |
| -0.613 | -1.189 | -0.072 | -0.222 | 0.149  |
| -0.362 | 0.217  | 0.511  | -0.634 | 1.145  |
| 1.754  | 1.281  | 0.355  | -0.062 | 0.418  |
| -0.828 | -0.523 | -0.320 | -0.835 | 0.515  |
| -1.538 | -2.203 | 0.323  | -0.037 | 0.361  |
| 2.437  | -0.121 | 0.165  | 0.424  | -0.259 |



|        |        |        |        |        |
|--------|--------|--------|--------|--------|
| 1.121  | 0.564  | 0.093  | 0.049  | 0.044  |
| 0.882  | 0.744  | 0.028  | -0.033 | 0.061  |
| -0.156 | -1.147 | 0.214  | 0.132  | 0.082  |
| 0.327  | 0.068  | 0.156  | -0.199 | 0.355  |
| -0.291 | -0.417 | 0.036  | 0.300  | -0.264 |
| -0.178 | -0.080 | -0.207 | -0.340 | 0.134  |
| 0.524  | 0.354  | -0.512 | -0.259 | -0.253 |
| -0.813 | -0.384 | -0.171 | 0.403  | -0.574 |
| 1.028  | 0.637  | 0.566  | 0.287  | 0.279  |
| -0.413 | -1.269 | 0.019  | 0.265  | -0.245 |
| -1.355 | -1.699 | -0.174 | 0.711  | -0.885 |
| 0.770  | 1.276  | -0.767 | -0.341 | -0.426 |
| 0.944  | 1.070  | -0.397 | -0.271 | -0.126 |
| 2.380  | 1.365  | 0.570  | 0.448  | 0.122  |
| -0.049 | 0.223  | -0.022 | 0.168  | -0.190 |
| 1.291  | 1.023  | 1.023  | 0.793  | 0.230  |
| -1.696 | -1.176 | -0.010 | 0.447  | -0.457 |
| 0.007  | 0.525  | 0.285  | 0.210  | 0.075  |
| -1.368 | -1.147 | 0.377  | -0.020 | 0.398  |
| 0.356  | 0.445  | 0.200  | -0.382 | 0.582  |
| 1.038  | 0.655  | 1.053  | 0.009  | 1.043  |
| 0.504  | -0.810 | 0.340  | -0.244 | 0.583  |
| -0.899 | -0.630 | 0.009  | -0.544 | 0.553  |
| -0.570 | -0.036 | 0.165  | -0.516 | 0.681  |
| -0.906 | -0.316 | 0.397  | -0.417 | 0.814  |
| 0.306  | -0.948 | 0.633  | 0.238  | 0.395  |
| -1.148 | -0.769 | 0.579  | 0.249  | 0.330  |
| -0.254 | 0.338  | 0.390  | -0.432 | 0.821  |
| 1.004  | 1.454  | 0.205  | -0.124 | 0.328  |
| 0.743  | 0.853  | 0.845  | 0.696  | 0.149  |
| 1.629  | 1.279  | -0.619 | -0.304 | -0.314 |
| 0.827  | 0.001  | -0.034 | 0.004  | -0.038 |
| -0.794 | -0.790 | -0.386 | -0.101 | -0.284 |
| 0.435  | -0.076 | 0.173  | -0.177 | 0.350  |
| -1.158 | -0.759 | 0.132  | -0.296 | 0.428  |
| -2.269 | -2.250 | -0.040 | -0.430 | 0.391  |
| -1.814 | -1.064 | -0.087 | -0.783 | 0.695  |
| -2.226 | -2.550 | -0.164 | -0.473 | 0.308  |
| -2.505 | -2.250 | 0.151  | -0.502 | 0.653  |
| 2.316  | 1.062  | 0.149  | 0.108  | 0.042  |
| 2.046  | 1.549  | 0.132  | 0.075  | 0.056  |
| 0.084  | 0.394  | 0.553  | -0.236 | 0.789  |
| 0.864  | 1.611  | 0.071  | -0.120 | 0.191  |
| -2.020 | -2.492 | 0.006  | 0.417  | -0.411 |
| -0.949 | -1.449 | 0.441  | 0.148  | 0.292  |
| 0.666  | -0.306 | 0.073  | 0.214  | -0.140 |
| 0.739  | -0.209 | 0.517  | -0.219 | 0.737  |
| -2.245 | -1.402 | 0.155  | -0.325 | 0.480  |
| -1.117 | -1.136 | -0.467 | 0.190  | -0.657 |
| 0.809  | -0.460 | -0.004 | 0.581  | -0.585 |
| -1.658 | -0.808 | 0.545  | 0.419  | 0.126  |

|        |        |        |        |        |
|--------|--------|--------|--------|--------|
| -2.691 | -1.728 | -0.185 | -0.504 | 0.318  |
| -1.323 | -1.588 | -0.379 | -0.303 | -0.076 |
| -1.391 | -1.476 | 0.119  | -0.354 | 0.473  |
| -0.077 | -0.420 | -0.224 | -0.250 | 0.026  |
| -0.090 | 0.047  | 0.020  | 0.150  | -0.130 |
| -1.867 | -1.316 | 0.496  | -0.714 | 1.210  |
| 0.015  | -0.208 | 0.460  | -0.336 | 0.796  |
| -0.217 | -0.398 | 0.073  | 0.025  | 0.048  |
| -1.802 | -0.365 | -0.210 | -0.530 | 0.321  |
| -1.640 | -1.225 | -0.139 | -0.531 | 0.392  |
| 1.451  | 1.051  | 0.501  | 0.075  | 0.426  |
| -1.171 | -2.152 | -0.198 | 0.001  | -0.199 |
| -2.218 | -1.986 | 0.020  | 0.090  | -0.070 |
| -0.734 | -0.142 | 0.525  | -0.293 | 0.818  |
| -1.751 | -1.003 | -0.222 | -0.629 | 0.406  |
| -1.494 | -1.832 | 0.389  | 0.357  | 0.032  |
| 0.649  | -0.735 | 0.342  | 0.561  | -0.220 |
| 1.813  | 0.838  | -0.060 | 0.199  | -0.259 |
| -0.799 | -0.950 | -0.709 | -0.390 | -0.319 |
| -1.214 | -2.205 | 0.128  | -0.061 | 0.189  |
| -2.073 | -1.844 | 0.032  | -0.389 | 0.421  |
| -2.869 | -3.274 | -0.134 | 0.432  | -0.566 |
| -0.444 | -1.051 | 0.040  | 0.595  | -0.555 |
| -2.409 | -2.253 | -0.154 | -0.136 | -0.018 |
| 0.050  | -0.859 | -0.609 | 0.139  | -0.749 |
| -0.877 | -1.332 | 0.093  | 0.027  | 0.066  |
| 0.522  | 0.909  | 0.199  | 0.225  | -0.026 |
| -2.609 | -2.155 | -0.254 | 0.239  | -0.493 |
| 1.402  | 1.544  | 0.756  | 0.437  | 0.319  |
| -1.776 | -1.765 | 0.295  | 0.441  | -0.146 |
| 0.105  | 0.402  | -0.322 | 0.253  | -0.576 |
| 0.638  | 0.973  | -0.253 | 0.746  | -0.998 |
| -0.366 | 0.338  | 0.887  | -0.003 | 0.891  |
| 0.207  | 0.180  | -0.101 | -0.001 | -0.100 |
| -2.239 | -1.864 | 0.299  | -0.140 | 0.439  |
| 0.518  | 0.294  | 0.744  | 1.350  | -0.605 |
| -2.689 | -2.455 | 0.127  | 1.075  | -0.949 |
| -2.360 | -2.009 | -0.133 | -0.056 | -0.077 |
| 0.458  | 0.413  | -0.675 | -0.170 | -0.505 |
| -1.615 | -1.165 | -0.480 | -0.155 | -0.325 |
| 2.180  | 2.547  | 0.444  | 0.201  | 0.242  |
| -0.110 | -0.275 | 0.103  | 1.127  | -1.024 |
| -1.319 | -1.166 | 0.104  | -0.109 | 0.213  |
| -0.451 | -0.113 | 0.684  | 0.087  | 0.596  |
| -1.860 | -0.682 | -0.177 | 0.222  | -0.399 |
| -0.805 | 0.513  | -0.109 | 0.484  | -0.593 |
| 1.504  | 1.463  | 0.219  | -0.180 | 0.399  |
| -0.373 | -0.587 | 0.273  | -0.239 | 0.512  |
| -2.014 | -1.227 | -0.314 | -0.746 | 0.432  |
| -2.680 | -1.918 | 0.472  | 0.101  | 0.372  |
| -0.095 | -0.111 | -0.022 | -0.266 | 0.243  |

|        |        |        |        |        |
|--------|--------|--------|--------|--------|
| 0.291  | 1.197  | -0.545 | -0.162 | -0.383 |
| 0.930  | 0.590  | 0.189  | 0.442  | -0.253 |
| 0.900  | 1.664  | 0.277  | -0.294 | 0.571  |
| 2.420  | 1.339  | 0.303  | 0.242  | 0.061  |
| 0.607  | 0.561  | 0.521  | 0.110  | 0.411  |
| 0.034  | 0.489  | 0.289  | -0.748 | 1.038  |
| 0.102  | -0.834 | 0.392  | 0.452  | -0.060 |
| -0.909 | -0.772 | -0.116 | -0.201 | 0.085  |
| 1.265  | 0.968  | -0.821 | -0.420 | -0.401 |
| 1.418  | 1.228  | -0.305 | 0.704  | -1.010 |
| 1.238  | 0.834  | -0.073 | 0.829  | -0.902 |
| -1.292 | -1.909 | -0.030 | -0.105 | 0.075  |
| -0.495 | -0.619 | -0.303 | -0.314 | 0.011  |
| -0.321 | -0.429 | 0.192  | 0.363  | -0.171 |
| -1.781 | -0.461 | 0.290  | -0.419 | 0.708  |
| 0.369  | 0.386  | 0.103  | -0.339 | 0.441  |
| -2.648 | -2.718 | 0.006  | 0.241  | -0.235 |
| 1.394  | 1.236  | -0.212 | 0.271  | -0.482 |
| -0.791 | -0.393 | -0.087 | -0.378 | 0.292  |
| 1.702  | 2.000  | -0.258 | -0.599 | 0.341  |
| 2.910  | 1.491  | 0.239  | 0.127  | 0.112  |
| -2.791 | -2.490 | 0.109  | -0.009 | 0.118  |
| -0.843 | -0.297 | -0.168 | -0.115 | -0.053 |
| -1.404 | -1.461 | -0.049 | 0.688  | -0.737 |
| -1.025 | -0.606 | 0.149  | -0.695 | 0.844  |
| -0.651 | -0.429 | -0.585 | 0.379  | -0.964 |
| 0.068  | 0.806  | 0.140  | -0.568 | 0.707  |
| 1.093  | 1.082  | -0.163 | 0.204  | -0.366 |
| 1.624  | 1.418  | 0.111  | 0.207  | -0.095 |
| 0.975  | 1.212  | 0.935  | 1.155  | -0.220 |
| 0.006  | 0.953  | 0.358  | 0.200  | 0.158  |
| 2.335  | 1.892  | 0.494  | 0.563  | -0.068 |
| -1.328 | -1.402 | -0.343 | 0.021  | -0.364 |
| 0.248  | 0.890  | -0.089 | 0.083  | -0.172 |
| 1.560  | 1.350  | 0.097  | -0.132 | 0.229  |
| -0.623 | 0.545  | -0.576 | 0.084  | -0.659 |
| -0.007 | 0.169  | 0.336  | -0.065 | 0.401  |
| 0.208  | 0.472  | 0.027  | -0.225 | 0.252  |
| 2.034  | 1.544  | -0.789 | -0.287 | -0.502 |
| 0.640  | 0.248  | 0.211  | 0.118  | 0.093  |
| 1.315  | 0.567  | -0.672 | -0.001 | -0.671 |
| 0.974  | 1.530  | -0.259 | -0.090 | -0.169 |
| 0.024  | 1.152  | 0.067  | -0.240 | 0.308  |
| -0.268 | 0.170  | -0.003 | -0.251 | 0.248  |
| -2.035 | -2.193 | 0.298  | 0.022  | 0.276  |
| -0.060 | -0.539 | 0.191  | -0.039 | 0.230  |
| 2.381  | 2.413  | 0.422  | 0.010  | 0.412  |
| -1.537 | -1.094 | 0.408  | -0.445 | 0.853  |
| 0.912  | 0.184  | 0.337  | 0.849  | -0.512 |
| -2.905 | -2.122 | -0.334 | -1.168 | 0.834  |
| 1.364  | 1.362  | 0.313  | 0.163  | 0.149  |

|        |        |        |        |        |
|--------|--------|--------|--------|--------|
| -2.056 | -2.043 | 0.254  | -0.421 | 0.675  |
| -1.382 | -2.101 | 0.038  | 0.228  | -0.190 |
| -3.451 | -1.181 | 0.044  | 0.595  | -0.552 |
| -0.037 | -0.716 | 0.561  | -0.175 | 0.736  |
| 0.652  | -0.178 | 0.370  | -0.029 | 0.399  |
| 1.302  | 1.709  | 0.058  | 0.168  | -0.110 |
| -2.455 | -2.372 | 0.312  | -0.287 | 0.599  |
| 1.636  | 0.076  | 0.177  | 0.293  | -0.116 |
| -0.149 | 0.460  | -0.022 | 0.050  | -0.072 |
| 0.094  | 0.881  | 0.036  | -0.280 | 0.316  |
| 2.190  | 1.423  | 0.133  | 0.051  | 0.082  |
| 0.622  | 0.253  | 0.234  | 0.252  | -0.018 |
| 2.390  | 2.190  | -0.416 | -0.374 | -0.042 |
| -2.313 | -0.942 | 0.048  | -0.419 | 0.468  |
| 0.050  | 0.585  | 0.600  | -0.029 | 0.629  |
| 2.365  | 1.965  | 0.437  | -0.079 | 0.516  |
| 0.435  | 0.412  | 0.270  | -0.129 | 0.399  |
| -2.088 | -2.093 | 0.538  | 0.074  | 0.464  |
| -2.704 | -3.475 | -0.025 | 0.195  | -0.219 |
| -2.789 | -2.197 | -0.301 | -0.233 | -0.068 |
| -1.939 | -1.219 | -0.454 | -0.605 | 0.151  |
| -1.249 | -0.901 | -0.177 | -0.445 | 0.268  |
| 1.901  | 1.129  | -0.587 | 0.320  | -0.907 |
| 1.509  | 1.401  | 0.404  | 0.819  | -0.415 |
| 1.426  | 0.263  | 0.352  | -0.267 | 0.619  |
| 0.796  | -0.363 | -1.493 | -0.240 | -1.253 |
| -1.188 | -0.614 | 0.375  | 0.125  | 0.250  |
| -1.257 | -0.920 | 0.553  | 0.480  | 0.072  |
| -0.429 | -0.501 | -0.398 | -0.260 | -0.138 |
| -0.101 | -0.019 | -0.292 | -0.043 | -0.249 |
| -2.029 | -1.188 | -0.077 | -0.813 | 0.737  |
| 2.376  | 1.390  | 0.274  | 0.032  | 0.242  |
| 1.066  | 0.158  | -0.075 | 0.057  | -0.132 |
| -1.032 | -0.865 | -0.136 | -0.106 | -0.030 |
| 1.013  | 1.551  | 0.068  | 1.021  | -0.953 |
| -0.990 | -1.353 | 0.033  | 0.218  | -0.185 |
| 0.776  | 0.875  | 0.212  | 0.089  | 0.123  |
| 0.055  | -0.414 | 0.506  | 0.010  | 0.496  |
| 0.405  | 0.249  | 0.791  | 0.303  | 0.488  |
| -2.951 | -3.026 | 0.275  | 0.084  | 0.191  |
| 1.726  | 1.920  | 0.066  | 0.252  | -0.187 |
| -1.248 | -1.582 | 0.037  | -0.526 | 0.563  |
| -2.481 | -2.674 | 0.424  | 0.396  | 0.027  |
| -0.362 | -0.121 | -0.380 | -0.574 | 0.194  |
| 0.290  | 0.459  | 0.079  | -0.123 | 0.202  |
| -1.247 | -0.923 | 0.262  | -0.190 | 0.452  |
| 0.995  | 1.957  | 0.381  | 0.304  | 0.077  |
| 1.199  | 0.402  | 0.304  | 0.118  | 0.185  |
| 0.365  | 0.662  | 0.307  | 0.141  | 0.166  |
| 2.168  | 1.360  | 0.173  | -0.181 | 0.354  |
| -0.897 | -1.593 | -0.088 | 0.004  | -0.092 |

|        |        |        |        |        |
|--------|--------|--------|--------|--------|
| 1.435  | 1.628  | 0.027  | -0.250 | 0.277  |
| -2.261 | -1.405 | 0.189  | -0.368 | 0.557  |
| -0.845 | -1.643 | 0.534  | 0.127  | 0.408  |
| 0.454  | 0.812  | 0.251  | -0.310 | 0.561  |
| 0.537  | 0.324  | 0.006  | -0.094 | 0.099  |
| -0.919 | -0.035 | 0.106  | -0.330 | 0.436  |
| 0.577  | 0.702  | 0.182  | -0.357 | 0.539  |
| 0.157  | -1.051 | 0.087  | 0.450  | -0.364 |
| 1.828  | 1.777  | -0.196 | -0.600 | 0.404  |
| 1.813  | 2.088  | 0.401  | -0.264 | 0.665  |
| 0.710  | 0.691  | -0.334 | -0.219 | -0.115 |
| 1.469  | 1.389  | -0.583 | -0.070 | -0.513 |
| 1.562  | 0.771  | -1.328 | -0.307 | -1.020 |
| -0.039 | -0.591 | -0.993 | -0.406 | -0.587 |
| -1.704 | -1.474 | 0.112  | -0.976 | 1.088  |
| 1.457  | 1.318  | -0.149 | -0.495 | 0.346  |
| 2.007  | 1.334  | 0.606  | 0.355  | 0.251  |
| 1.125  | 1.306  | 0.346  | 0.095  | 0.252  |
| -3.804 | -3.010 | 0.244  | 0.457  | -0.212 |
| -2.402 | -2.150 | -0.064 | -0.455 | 0.391  |
| 2.046  | 2.222  | 0.270  | -0.750 | 1.020  |
| 1.560  | 1.569  | 0.253  | 0.027  | 0.226  |
| -0.594 | -0.388 | 0.255  | -0.005 | 0.260  |
| -1.492 | -1.623 | 0.052  | -0.077 | 0.129  |
| 2.066  | 0.912  | 0.327  | 0.390  | -0.063 |
| 0.873  | -0.349 | 0.277  | -0.056 | 0.333  |
| -1.535 | -2.068 | 0.419  | 0.205  | 0.214  |
| -1.381 | -0.593 | 0.376  | -0.091 | 0.466  |
| 1.082  | 1.305  | 0.131  | -0.149 | 0.280  |
| 0.331  | -0.975 | -1.689 | -0.569 | -1.120 |
| 0.844  | 0.914  | -0.008 | 0.042  | -0.049 |
| -1.951 | -1.345 | 0.016  | -0.279 | 0.295  |
| -1.248 | -1.611 | 0.310  | -0.460 | 0.771  |
| -0.490 | -0.404 | 0.382  | 0.501  | -0.119 |
| -0.387 | -0.449 | -0.291 | -0.232 | -0.058 |
| -0.938 | -0.550 | -0.037 | -0.298 | 0.260  |
| -1.404 | 0.569  | 0.092  | -1.281 | 1.373  |
| 1.644  | 1.733  | 0.139  | -0.209 | 0.348  |
| -0.490 | -0.004 | 0.391  | -0.628 | 1.019  |
| -2.267 | -2.402 | 0.301  | 0.785  | -0.484 |
| -1.903 | -0.155 | 0.126  | -0.932 | 1.058  |
| -0.697 | -0.359 | -0.110 | -0.392 | 0.281  |
| -1.125 | -1.015 | 0.133  | 0.340  | -0.207 |
| -3.054 | -2.132 | -0.130 | 0.705  | -0.835 |
| -0.934 | -0.747 | -0.014 | 0.295  | -0.309 |
| 0.651  | 0.591  | -0.049 | -0.172 | 0.122  |
| -3.530 | -2.956 | -0.079 | -0.195 | 0.116  |
| -3.226 | -2.590 | 0.114  | -0.845 | 0.959  |
| 0.736  | 0.655  | -0.234 | -0.162 | -0.072 |
| -0.752 | -0.613 | -0.112 | 0.072  | -0.184 |
| 1.047  | -0.584 | 0.001  | 0.133  | -0.132 |

|        |        |        |        |        |
|--------|--------|--------|--------|--------|
| 1.613  | 1.671  | 0.205  | 0.063  | 0.142  |
| 1.775  | 1.630  | -0.118 | 0.377  | -0.495 |
| -1.526 | -0.872 | 0.104  | -0.165 | 0.269  |
| -0.647 | 0.143  | -0.384 | -0.475 | 0.091  |
| 0.529  | -0.232 | -0.730 | -0.008 | -0.721 |
| -1.349 | -0.630 | -0.160 | -0.470 | 0.310  |
| 0.759  | 0.682  | 0.260  | -0.726 | 0.986  |
| -1.808 | -0.958 | -0.072 | -0.068 | -0.004 |
| -1.896 | -1.313 | -0.192 | -0.010 | -0.181 |
| -2.473 | -1.340 | -0.286 | 0.470  | -0.756 |
| -1.105 | -1.394 | 0.143  | 0.859  | -0.717 |
| 0.910  | 0.431  | -0.256 | -0.411 | 0.155  |
| -2.127 | -1.954 | -0.134 | -0.096 | -0.038 |
| -1.111 | -1.251 | 0.035  | 0.089  | -0.054 |
| -0.800 | -0.864 | 1.454  | 0.827  | 0.627  |
| 0.912  | 0.711  | 0.066  | -0.116 | 0.181  |
| 0.308  | -0.870 | -0.496 | 0.549  | -1.045 |
| 1.143  | 0.787  | -0.135 | -0.089 | -0.047 |
| -0.007 | -0.447 | 0.428  | 0.151  | 0.276  |
| -0.741 | -1.224 | 0.277  | -0.023 | 0.300  |
| 1.203  | 1.076  | 0.691  | 0.668  | 0.023  |
| 0.673  | 0.212  | -0.007 | 0.102  | -0.109 |
| -0.773 | -0.741 | 0.635  | 0.042  | 0.593  |
| 1.367  | 0.331  | 0.099  | 0.363  | -0.264 |
| -1.739 | -1.444 | 0.014  | -0.410 | 0.424  |
| -1.699 | -0.973 | 0.045  | -0.378 | 0.423  |
| -0.888 | -0.169 | -0.411 | -0.487 | 0.075  |
| 0.171  | 0.239  | 0.000  | -0.136 | 0.136  |
| -3.428 | -2.820 | -0.181 | -0.156 | -0.025 |
| 0.802  | 0.981  | 0.127  | -0.175 | 0.301  |
| 2.271  | 1.691  | 0.596  | -0.340 | 0.936  |
| -0.060 | -0.035 | -0.142 | 0.246  | -0.389 |
| -0.529 | -0.212 | 0.238  | -0.196 | 0.434  |
| -1.005 | -0.505 | 0.571  | 0.251  | 0.320  |
| 0.448  | 0.220  | -0.044 | 0.035  | -0.078 |
| 0.930  | 2.111  | 0.197  | -0.450 | 0.647  |
| -1.637 | -1.202 | -0.711 | -0.157 | -0.554 |
| 0.060  | -0.533 | -0.299 | 0.261  | -0.560 |
| -2.266 | -1.499 | -1.320 | -1.390 | 0.070  |
| 0.864  | 1.760  | 0.500  | -0.417 | 0.918  |
| 1.589  | 1.417  | 0.433  | 0.432  | 0.000  |
| 2.139  | 1.000  | 0.130  | 0.256  | -0.126 |
| 2.541  | 1.749  | -0.267 | -0.174 | -0.092 |
| -4.239 | -3.472 | -0.107 | -0.081 | -0.026 |
| -0.180 | 0.003  | -0.760 | -0.721 | -0.039 |
| -1.030 | -1.423 | 0.610  | 0.391  | 0.219  |
| -1.934 | -2.502 | 0.433  | 0.551  | -0.118 |
| -0.263 | 1.317  | -0.892 | -1.367 | 0.475  |
| 1.326  | 1.133  | -0.117 | -0.177 | 0.060  |
| -1.569 | -1.074 | -0.151 | -1.013 | 0.862  |
| 0.299  | 0.081  | -0.189 | -0.467 | 0.279  |

|        |        |        |        |        |
|--------|--------|--------|--------|--------|
| 0.445  | -0.674 | -0.095 | -0.115 | 0.020  |
| 0.203  | 0.146  | 0.141  | 0.183  | -0.042 |
| -0.149 | -0.467 | 0.340  | 0.693  | -0.354 |
| -1.003 | -1.168 | -0.150 | -0.210 | 0.060  |
| -1.704 | -0.539 | 0.227  | -0.066 | 0.293  |
| -0.274 | 0.520  | 0.647  | 0.020  | 0.627  |
| -1.393 | -1.135 | 0.401  | -0.150 | 0.552  |
| 0.275  | 0.367  | 0.427  | 0.250  | 0.177  |
| -2.599 | -1.780 | -0.096 | -0.385 | 0.289  |
| 1.105  | 0.419  | -0.407 | 0.468  | -0.875 |
| -1.815 | -2.387 | 0.047  | -0.392 | 0.440  |
| -0.041 | 2.698  | -0.316 | -0.670 | 0.354  |
| -1.779 | -0.338 | -0.405 | -0.967 | 0.563  |
| 2.113  | 0.378  | 0.370  | 0.374  | -0.004 |
| 1.922  | 0.853  | -1.268 | -0.677 | -0.591 |
| 0.930  | -0.289 | -0.662 | -0.032 | -0.631 |
| 2.839  | 2.364  | 0.387  | -0.203 | 0.590  |
| 1.689  | 1.932  | 0.028  | -0.553 | 0.581  |
| 1.070  | 1.194  | -0.566 | 0.016  | -0.582 |
| -0.220 | -0.050 | -1.171 | -0.104 | -1.067 |
| 0.689  | 0.014  | 0.069  | 0.291  | -0.222 |
| -0.820 | -0.474 | 0.059  | -0.174 | 0.233  |
| 1.958  | 1.196  | 0.624  | 0.590  | 0.034  |
| 0.540  | -0.492 | 0.019  | 0.151  | -0.132 |
| 1.328  | 0.387  | 0.188  | 0.193  | -0.005 |
| 2.576  | 2.563  | 0.365  | -0.214 | 0.579  |
| 0.886  | 0.301  | 0.164  | -0.120 | 0.284  |
| 1.057  | 1.253  | 0.091  | -0.343 | 0.435  |
| 0.254  | 0.860  | 0.150  | -0.647 | 0.797  |
| 0.729  | -0.080 | 0.252  | 0.689  | -0.437 |
| -0.712 | -1.781 | -0.409 | -0.443 | 0.034  |
| 1.489  | 1.964  | 0.484  | -0.692 | 1.176  |
| 1.972  | 0.989  | 0.778  | 0.511  | 0.267  |
| 3.046  | 1.759  | -0.676 | -0.193 | -0.483 |
| -0.490 | -0.377 | 0.483  | -0.075 | 0.558  |
| -1.613 | -0.508 | -0.548 | -0.537 | -0.012 |
| 0.165  | 0.318  | 0.730  | -0.173 | 0.903  |
| 1.200  | 0.729  | -0.274 | 0.323  | -0.597 |
| -1.909 | -2.126 | 0.249  | -0.037 | 0.285  |
| -0.457 | -1.085 | 0.013  | 0.794  | -0.781 |
| -0.995 | -0.897 | -0.328 | 0.629  | -0.957 |
| -1.522 | -1.345 | -0.541 | -0.149 | -0.392 |
| -2.150 | -1.762 | -0.093 | -0.326 | 0.233  |
| -4.019 | -2.845 | -0.028 | 0.213  | -0.241 |
| -1.374 | -0.870 | 0.046  | -0.333 | 0.379  |
| -0.938 | -0.348 | -0.287 | -0.096 | -0.190 |
| -0.123 | 0.110  | 0.129  | 0.716  | -0.587 |
| -0.353 | -0.152 | 0.038  | -0.356 | 0.395  |
| 1.346  | 0.363  | 0.592  | 0.787  | -0.195 |
| -0.406 | -0.657 | 0.407  | -0.257 | 0.663  |
| 0.678  | 0.185  | 0.395  | 0.365  | 0.030  |

|        |        |        |        |        |
|--------|--------|--------|--------|--------|
| -2.117 | -1.603 | -0.048 | -0.249 | 0.201  |
| -0.108 | -1.037 | -0.029 | 0.051  | -0.080 |
| 0.109  | -0.271 | 0.073  | -0.181 | 0.254  |
| 1.585  | 1.208  | 0.018  | 0.463  | -0.445 |
| 1.592  | 2.553  | -0.273 | -0.633 | 0.360  |
| 1.828  | 1.173  | -0.061 | 0.208  | -0.269 |
| 1.592  | 1.236  | -0.060 | 0.757  | -0.817 |
| 1.735  | 1.282  | 0.125  | -0.091 | 0.216  |
| 2.196  | 2.228  | 0.214  | -0.743 | 0.958  |
| 2.156  | 2.196  | -0.419 | -0.398 | -0.022 |
| 1.357  | 0.949  | 0.048  | -0.026 | 0.074  |
| -0.363 | 0.200  | 0.151  | 0.113  | 0.038  |
| -2.149 | -1.523 | -0.199 | -0.173 | -0.026 |
| -0.657 | -0.215 | 0.249  | -0.938 | 1.188  |
| 1.326  | 0.985  | 0.340  | 0.217  | 0.124  |
| -3.608 | -3.316 | -0.405 | -0.394 | -0.011 |
| -0.618 | -0.614 | 0.062  | -0.082 | 0.143  |
| 1.360  | 1.579  | -0.453 | -0.513 | 0.060  |
| -0.307 | -0.119 | -0.117 | -0.079 | -0.038 |
| -2.168 | -1.574 | -0.711 | -0.638 | -0.073 |
| -0.859 | -0.601 | -0.099 | -0.553 | 0.454  |
| 1.955  | 1.670  | 0.490  | -0.132 | 0.622  |
| -0.966 | -0.440 | 0.072  | -0.315 | 0.387  |
| -0.093 | 0.261  | -0.051 | -0.388 | 0.337  |
| -1.508 | -1.570 | 0.145  | -0.782 | 0.927  |
| -3.429 | -2.034 | -0.237 | -0.375 | 0.139  |
| 0.230  | 1.173  | 0.126  | -0.190 | 0.316  |
| -1.154 | -1.003 | 0.416  | 0.191  | 0.226  |
| -1.834 | -1.327 | -0.389 | -0.623 | 0.234  |
| 0.371  | 0.501  | -0.040 | -0.320 | 0.280  |
| 3.564  | 2.147  | -0.221 | -0.189 | -0.032 |
| -2.679 | -2.968 | 0.342  | 0.219  | 0.123  |
| -2.186 | -2.383 | 0.127  | -0.099 | 0.226  |
| 0.992  | 1.530  | 0.420  | 0.075  | 0.345  |
| -0.421 | 0.118  | -0.026 | -0.107 | 0.081  |
| 0.173  | -0.055 | 0.229  | 0.454  | -0.225 |
| 1.084  | 0.754  | 0.246  | 0.493  | -0.247 |
| -1.321 | -1.089 | -0.502 | -0.430 | -0.072 |
| 0.981  | 0.991  | 0.507  | -0.150 | 0.657  |
| -2.374 | -1.816 | -0.558 | -0.531 | -0.027 |
| 0.864  | 1.341  | -0.173 | -0.223 | 0.050  |
| 0.317  | 0.140  | -0.018 | 0.237  | -0.255 |
| -2.256 | -1.392 | -0.127 | -0.926 | 0.799  |
| 0.468  | 0.755  | 0.024  | -0.336 | 0.360  |
| 0.666  | 0.237  | 0.236  | 0.188  | 0.048  |
| -0.259 | -0.852 | -0.551 | 0.308  | -0.859 |
| 0.208  | -0.330 | 0.102  | 0.772  | -0.671 |
| -0.064 | 0.253  | -0.274 | 0.393  | -0.667 |
| 0.527  | 0.553  | 0.162  | 0.707  | -0.545 |
| 1.555  | 0.947  | 0.136  | 0.398  | -0.262 |
| -1.311 | 0.023  | 0.496  | -1.157 | 1.654  |



|        |        |        |        |        |
|--------|--------|--------|--------|--------|
| -1.772 | -2.188 | -0.022 | -0.367 | 0.344  |
| 2.210  | 2.108  | 0.413  | -0.165 | 0.578  |
| 0.036  | -0.724 | -0.221 | 0.010  | -0.231 |
| -1.823 | -1.711 | -0.777 | -0.995 | 0.218  |
| -0.899 | -1.060 | 0.097  | 0.339  | -0.242 |
| 1.344  | 1.523  | 0.279  | 0.040  | 0.240  |
| 0.080  | -1.157 | -0.177 | 0.567  | -0.744 |
| -0.588 | -1.111 | -0.317 | 0.543  | -0.861 |
| 0.218  | 0.389  | -0.633 | -0.052 | -0.580 |
| -1.331 | -1.640 | 0.153  | 0.180  | -0.027 |
| -2.113 | -1.834 | 0.125  | 0.107  | 0.018  |
| -1.652 | -1.900 | -0.228 | -0.449 | 0.220  |
| -2.917 | -2.983 | -0.081 | -0.041 | -0.041 |
| -1.215 | -1.040 | 0.187  | -0.497 | 0.684  |
| 2.242  | 1.653  | 0.855  | 0.278  | 0.577  |
| 0.158  | 0.623  | -0.025 | -0.363 | 0.338  |
| -2.809 | -2.698 | -0.146 | -0.187 | 0.041  |
| 0.950  | 0.560  | -0.070 | -0.293 | 0.223  |
| 0.841  | 1.286  | 0.232  | -0.327 | 0.559  |
| -1.474 | -1.269 | -0.403 | -0.566 | 0.162  |
| 2.237  | 1.630  | 0.105  | 0.064  | 0.041  |
| 0.077  | 0.459  | -0.139 | -0.486 | 0.347  |
| -0.231 | -0.952 | -0.116 | 0.404  | -0.521 |
| -1.039 | -1.945 | -0.399 | 0.040  | -0.439 |
| -0.677 | -0.316 | -0.394 | -0.134 | -0.259 |
| -1.436 | -2.156 | -0.127 | -0.246 | 0.119  |
| -0.242 | -1.086 | 0.185  | 0.275  | -0.089 |
| 2.090  | 0.560  | 0.456  | 0.391  | 0.065  |
| -1.215 | -0.700 | -0.127 | -0.421 | 0.294  |
| -1.865 | -1.406 | -0.193 | -0.558 | 0.365  |
| 0.554  | 1.138  | 0.288  | 0.225  | 0.064  |
| -0.910 | -2.020 | -0.310 | -0.022 | -0.288 |
| -1.227 | -1.622 | 0.257  | -0.110 | 0.367  |
| 1.471  | 0.117  | 0.121  | -0.312 | 0.433  |
| -2.380 | -1.461 | -0.873 | -0.586 | -0.287 |
| 1.290  | 1.588  | 0.684  | -0.616 | 1.300  |
| 1.503  | 1.862  | 0.096  | -0.495 | 0.591  |
| 1.085  | 0.561  | -0.365 | -0.120 | -0.245 |
| 2.716  | 2.011  | -0.222 | -0.471 | 0.249  |
| -2.844 | -2.378 | 0.042  | -0.692 | 0.734  |
| -0.007 | 0.037  | 0.073  | -0.325 | 0.397  |
| -1.450 | -2.143 | -0.229 | 0.228  | -0.457 |
| -2.309 | -2.381 | -0.090 | -0.576 | 0.486  |
| -0.936 | -1.002 | 0.615  | -0.181 | 0.795  |
| 1.517  | 1.771  | 0.260  | -0.284 | 0.544  |
| -0.385 | -0.707 | 0.699  | -0.088 | 0.787  |
| 0.171  | 0.478  | -0.694 | -1.024 | 0.330  |
| -0.297 | -0.387 | -0.412 | 0.519  | -0.931 |
| -0.496 | 0.107  | -0.359 | -0.218 | -0.141 |
| -2.839 | -1.772 | 0.513  | -0.755 | 1.268  |
| -0.010 | -1.092 | 0.479  | 0.292  | 0.187  |

|        |        |        |        |        |
|--------|--------|--------|--------|--------|
| 0.449  | 0.227  | -0.015 | -0.280 | 0.265  |
| -1.265 | -0.429 | 0.251  | -0.058 | 0.309  |
| 1.368  | 1.532  | -0.448 | -0.446 | -0.003 |
| -3.574 | -3.133 | 0.275  | -0.170 | 0.445  |
| -1.077 | -0.554 | -0.660 | -0.984 | 0.324  |
| -2.741 | -2.244 | -0.210 | -0.494 | 0.284  |
| -2.652 | -2.693 | 0.387  | -0.180 | 0.567  |
| -3.524 | -3.353 | 0.212  | 0.224  | -0.011 |
| -3.099 | -2.869 | 0.214  | -0.192 | 0.405  |
| -1.983 | -1.532 | 0.104  | -0.235 | 0.338  |
| -0.390 | 0.767  | -0.074 | -1.001 | 0.927  |
| -0.605 | -0.682 | -0.512 | -1.220 | 0.707  |
| -1.706 | -0.801 | 0.349  | -1.984 | 2.333  |
| -1.268 | -0.685 | -0.347 | -0.466 | 0.119  |
| 0.380  | -0.969 | 0.099  | 0.616  | -0.517 |
| -0.936 | -0.571 | 0.838  | -0.394 | 1.232  |
| -1.074 | -1.049 | 0.197  | 0.030  | 0.167  |
| -1.193 | -1.333 | -0.351 | -0.224 | -0.127 |
| -1.256 | -1.446 | -0.387 | -0.359 | -0.027 |
| 1.103  | 0.560  | 0.092  | -0.398 | 0.489  |
| 2.251  | 1.174  | -0.106 | 0.281  | -0.386 |
| 2.201  | 1.187  | 0.151  | -0.034 | 0.185  |
| -0.312 | 0.061  | 0.821  | 0.136  | 0.684  |
| 0.209  | 0.698  | -0.219 | 0.050  | -0.268 |
| 2.203  | 2.295  | 0.647  | -0.543 | 1.190  |
| -2.019 | -1.521 | -0.242 | -0.759 | 0.517  |
| -0.890 | -0.680 | -0.028 | -0.348 | 0.319  |
| 0.633  | -0.358 | -0.014 | -0.112 | 0.098  |
| -0.034 | 0.427  | 0.290  | 0.203  | 0.087  |
| -0.260 | 0.458  | -0.635 | -0.942 | 0.306  |
| 1.688  | 0.872  | -0.345 | -0.086 | -0.259 |
| 1.092  | 1.224  | -0.393 | 0.003  | -0.396 |
| 2.076  | 2.089  | 0.072  | 0.229  | -0.156 |
| 2.694  | 2.776  | 0.572  | -0.830 | 1.402  |
| 1.809  | 1.881  | 0.280  | -0.870 | 1.150  |
| 0.356  | -0.150 | -0.106 | 0.108  | -0.214 |
| 0.788  | 0.241  | -0.224 | -0.020 | -0.204 |
| 0.628  | -0.461 | 0.189  | 0.112  | 0.077  |
| 1.049  | 0.275  | -0.240 | -0.362 | 0.122  |
| 0.482  | 0.620  | 0.404  | 0.208  | 0.197  |
| 1.905  | 1.078  | -0.177 | 0.418  | -0.595 |
| -0.304 | 0.551  | -0.193 | -0.513 | 0.320  |
| 2.466  | 2.756  | 0.401  | -0.622 | 1.023  |
| -3.169 | -2.591 | -0.396 | -0.758 | 0.362  |
| 0.208  | 0.032  | -0.174 | -0.418 | 0.244  |
| -2.986 | -2.589 | -0.751 | -0.825 | 0.074  |
| -0.578 | -1.548 | 0.004  | -0.083 | 0.087  |
| -1.286 | -0.477 | -0.539 | -0.484 | -0.055 |
| -1.274 | -1.094 | 0.122  | -0.446 | 0.569  |
| -2.624 | -1.808 | 0.455  | -0.886 | 1.341  |
| -1.898 | -1.336 | -0.079 | -0.422 | 0.343  |

|        |        |        |        |        |
|--------|--------|--------|--------|--------|
| 1.988  | 2.461  | 0.448  | -0.146 | 0.594  |
| -2.739 | -2.702 | -0.157 | 0.080  | -0.237 |
| 1.838  | 1.623  | 0.964  | 0.772  | 0.192  |
| 0.782  | 1.331  | 1.246  | 0.787  | 0.460  |
| -0.792 | -1.180 | -0.041 | -0.338 | 0.296  |
| -1.763 | -1.671 | 0.313  | -0.369 | 0.682  |
| -0.427 | -0.405 | -0.043 | -0.304 | 0.261  |
| 1.035  | -0.192 | -0.471 | -0.331 | -0.141 |
| -0.866 | -0.784 | 0.071  | -0.313 | 0.384  |
| 1.812  | 0.247  | -0.027 | 0.319  | -0.346 |
| -1.328 | -2.248 | -0.866 | -0.742 | -0.124 |
| 1.592  | 1.563  | 0.616  | -0.390 | 1.006  |
| 0.543  | 0.737  | -0.320 | 0.051  | -0.371 |
| -1.002 | -2.585 | -0.197 | -0.334 | 0.137  |
| 0.223  | -0.195 | -0.049 | -0.091 | 0.042  |
| -1.649 | -1.065 | -0.290 | -0.668 | 0.377  |
| 1.915  | 1.718  | -0.229 | 0.027  | -0.257 |
| -0.383 | -1.178 | 0.155  | -0.204 | 0.359  |
| -0.366 | 0.307  | -0.321 | -0.670 | 0.349  |
| 2.356  | 2.173  | -0.298 | -0.109 | -0.189 |
| -1.659 | -2.176 | -0.181 | -0.177 | -0.004 |
| 1.993  | 0.794  | 0.205  | 0.425  | -0.220 |
| 1.494  | 0.271  | -0.263 | 0.147  | -0.410 |
| 0.417  | -0.044 | 0.165  | -0.244 | 0.410  |
| -0.743 | -0.964 | -0.034 | -0.106 | 0.071  |
| -1.572 | -2.049 | 0.024  | -0.627 | 0.650  |
| 2.171  | 2.592  | -0.237 | -0.822 | 0.585  |
| -2.198 | -1.092 | 0.096  | -1.282 | 1.378  |
| -1.044 | -1.233 | 0.624  | -0.624 | 1.248  |
| -1.440 | -1.679 | 0.101  | -0.249 | 0.350  |
| 0.020  | -0.022 | 0.206  | 0.171  | 0.035  |
| -1.203 | -1.662 | -0.201 | 0.126  | -0.327 |
| -2.284 | -0.832 | 0.083  | -0.605 | 0.688  |
| 2.113  | 2.309  | 0.846  | -0.317 | 1.163  |
| -0.076 | -0.440 | -0.215 | 0.276  | -0.491 |
| -0.906 | 0.171  | 0.097  | -0.083 | 0.180  |
| -1.207 | -0.618 | -0.072 | -0.045 | -0.027 |
| -0.020 | -1.225 | 0.009  | -0.170 | 0.179  |
| -0.437 | -0.799 | -0.111 | -0.355 | 0.244  |
| 1.211  | 0.552  | 0.185  | -0.148 | 0.332  |
| 0.789  | -0.192 | 1.347  | 0.626  | 0.721  |
| -0.137 | -0.561 | -0.170 | -0.562 | 0.392  |
| -0.360 | -0.612 | -0.013 | 0.233  | -0.246 |
| 0.278  | 0.258  | 0.581  | -0.155 | 0.736  |
| 1.346  | 1.649  | -0.141 | -0.721 | 0.579  |
| -1.136 | -0.875 | -0.085 | -0.855 | 0.770  |
| 0.315  | -0.713 | 0.232  | 0.482  | -0.250 |
| 0.586  | 0.061  | -0.223 | -0.035 | -0.188 |
| 0.024  | 0.416  | 0.884  | -0.253 | 1.137  |
| -1.304 | -0.380 | 0.375  | -0.286 | 0.661  |
| -2.813 | -2.374 | 0.066  | -0.474 | 0.540  |

|        |        |        |        |        |
|--------|--------|--------|--------|--------|
| 1.259  | 1.970  | -0.119 | 0.354  | -0.473 |
| -1.439 | -0.946 | -0.571 | -0.677 | 0.107  |
| -0.116 | -0.322 | 0.102  | -0.222 | 0.324  |
| 0.367  | 0.113  | 0.232  | 0.454  | -0.222 |
| 0.315  | -0.057 | 0.299  | -0.027 | 0.326  |
| -2.084 | -2.725 | 0.174  | 0.054  | 0.120  |
| 0.282  | -0.871 | 0.203  | 0.639  | -0.436 |
| -1.218 | -1.156 | 0.552  | 0.413  | 0.140  |
| -3.522 | -2.761 | -0.562 | -1.293 | 0.731  |
| -1.937 | -1.093 | -0.068 | 0.600  | -0.668 |
| 1.548  | 0.507  | 0.203  | 0.093  | 0.110  |
| 1.488  | 0.397  | 0.627  | 1.015  | -0.388 |
| 0.418  | -0.329 | -0.021 | -0.114 | 0.094  |
| -0.532 | 0.445  | -0.260 | -0.424 | 0.165  |
| 0.744  | 1.202  | -0.369 | -0.679 | 0.309  |
| -1.591 | -2.621 | -0.320 | 0.038  | -0.358 |
| 0.440  | -0.276 | -0.919 | -0.139 | -0.780 |
| -0.072 | -0.715 | 0.074  | 0.084  | -0.011 |
| 2.215  | 2.054  | 0.017  | -0.048 | 0.065  |
| -1.087 | -0.248 | 0.218  | -0.106 | 0.323  |
| 2.357  | 1.929  | -0.162 | -0.295 | 0.134  |
| 2.672  | 1.773  | 0.663  | 0.337  | 0.326  |
| 0.819  | 0.878  | 0.117  | -0.175 | 0.292  |
| 2.045  | 1.747  | -0.078 | -0.047 | -0.031 |
| 1.611  | 1.370  | 0.285  | -0.032 | 0.317  |
| 0.784  | 0.351  | -0.386 | -0.211 | -0.175 |
| -2.399 | -1.771 | -0.663 | -0.650 | -0.013 |
| 2.245  | 1.839  | 0.126  | -0.011 | 0.137  |
| 0.455  | 0.809  | 0.281  | -0.447 | 0.729  |
| 2.114  | 1.890  | -0.453 | -0.472 | 0.019  |
| 1.161  | 1.734  | 0.130  | -0.806 | 0.936  |
| -0.815 | -0.499 | -0.523 | -0.228 | -0.294 |
| -1.487 | -0.958 | 0.403  | -0.480 | 0.883  |
| 1.155  | 1.309  | 0.328  | -0.380 | 0.708  |
| -0.210 | 0.440  | 0.180  | -0.205 | 0.385  |
| 1.247  | 0.633  | 0.075  | 0.442  | -0.366 |
| 0.443  | 0.993  | 0.163  | 0.246  | -0.083 |
| 1.695  | 0.384  | -0.434 | 0.103  | -0.537 |
| -3.919 | -3.357 | 0.683  | 0.248  | 0.436  |
| -2.877 | -1.654 | 0.186  | -0.527 | 0.713  |
| 1.386  | 0.106  | 0.121  | 0.802  | -0.681 |
| -0.959 | -0.606 | 0.334  | -0.305 | 0.639  |
| 0.363  | 0.077  | 0.011  | -0.159 | 0.170  |
| 1.010  | 1.496  | 0.190  | 0.072  | 0.118  |
| 0.447  | 0.210  | 0.335  | 0.409  | -0.074 |
| 0.757  | 0.677  | -0.066 | 0.047  | -0.113 |
| 0.454  | 0.775  | -0.367 | 0.301  | -0.667 |
| 2.010  | 1.721  | -0.789 | 0.186  | -0.975 |
| 2.127  | 1.973  | -0.584 | -0.463 | -0.121 |
| 1.326  | 1.735  | 0.054  | 0.199  | -0.145 |
| 0.024  | 0.328  | 0.061  | 0.060  | 0.001  |

|        |        |        |        |        |
|--------|--------|--------|--------|--------|
| 0.216  | 0.608  | -0.117 | -0.304 | 0.187  |
| -0.864 | -0.467 | 0.122  | -0.323 | 0.445  |
| -0.409 | -1.017 | 0.081  | -0.025 | 0.106  |
| 0.567  | 0.925  | 0.126  | 0.164  | -0.039 |
| -1.863 | -2.125 | 0.235  | 0.331  | -0.096 |
| -1.057 | -0.819 | 0.279  | -0.114 | 0.393  |
| -1.843 | -1.586 | -0.286 | -0.483 | 0.198  |
| -2.577 | -1.665 | -0.124 | 0.369  | -0.493 |
| 1.575  | 1.748  | 0.354  | 0.066  | 0.288  |
| -0.750 | -0.482 | 0.692  | -0.158 | 0.850  |
| -2.789 | -2.454 | 0.032  | -0.591 | 0.623  |
| -3.002 | -2.357 | 0.225  | -0.446 | 0.671  |
| 0.274  | -0.574 | -0.095 | 0.224  | -0.319 |
| -1.097 | -0.213 | 0.334  | 0.062  | 0.272  |
| -1.142 | -0.836 | 0.433  | 0.720  | -0.287 |
| -2.009 | -0.950 | 0.308  | -0.566 | 0.874  |
| 0.514  | -0.618 | 0.357  | 0.568  | -0.211 |
| -0.394 | -0.583 | 0.125  | 0.410  | -0.286 |
| 0.849  | 0.996  | 0.200  | 0.070  | 0.130  |
| -0.340 | 0.017  | 0.219  | -0.512 | 0.730  |
| 1.053  | 0.055  | 0.285  | 0.412  | -0.128 |
| 2.119  | 1.636  | 0.397  | 0.405  | -0.008 |
| 1.746  | 1.581  | 0.535  | 0.484  | 0.050  |
| 2.523  | 1.692  | -0.082 | 0.293  | -0.375 |
| 1.960  | 1.133  | -0.380 | -0.706 | 0.326  |
| 2.373  | 2.388  | -0.080 | -0.365 | 0.285  |
| 0.186  | 0.599  | 0.340  | -0.287 | 0.627  |
| 1.074  | 1.613  | -0.228 | -0.295 | 0.067  |
| 0.935  | 1.521  | 0.233  | -0.460 | 0.693  |
| 0.097  | 1.703  | 0.351  | -0.324 | 0.675  |
| -1.248 | -1.157 | 0.231  | 0.440  | -0.208 |
| -2.295 | -2.350 | 0.030  | -0.318 | 0.348  |
| 1.076  | 0.799  | 0.129  | 0.454  | -0.325 |
| 1.556  | 1.632  | 0.084  | 0.495  | -0.411 |
| -2.124 | -1.767 | -0.371 | -0.661 | 0.290  |
| 0.114  | 0.166  | 0.527  | -0.031 | 0.558  |
| -1.600 | -0.542 | -0.469 | -0.513 | 0.044  |
| -0.734 | -0.146 | 0.314  | -0.571 | 0.885  |
| 1.470  | 2.086  | 0.142  | 0.341  | -0.198 |
| 3.690  | 3.168  | -0.085 | 0.075  | -0.161 |
| -0.120 | 0.429  | -0.513 | -0.568 | 0.055  |
| -1.752 | -1.563 | -0.443 | -0.293 | -0.150 |
| -0.159 | 0.044  | 0.012  | -0.231 | 0.243  |
| -0.480 | -0.019 | 0.740  | -1.291 | 2.030  |
| -2.186 | -2.096 | -0.445 | -0.151 | -0.294 |
| -2.333 | -1.851 | -0.083 | 0.175  | -0.257 |
| -2.489 | -1.977 | -0.126 | -0.156 | 0.030  |
| -3.741 | -2.955 | -0.681 | -0.562 | -0.120 |
| -3.045 | -2.834 | -0.234 | 0.324  | -0.558 |
| -2.281 | -1.846 | -0.328 | 0.501  | -0.828 |
| -2.196 | -1.973 | 0.170  | 0.835  | -0.665 |

|        |        |        |        |        |
|--------|--------|--------|--------|--------|
| -1.801 | -0.643 | -0.494 | 0.053  | -0.547 |
| 0.771  | -0.375 | 0.409  | 0.548  | -0.139 |
| 1.073  | 1.149  | 0.009  | -0.308 | 0.317  |
| -1.810 | -1.496 | -0.038 | 1.011  | -1.049 |
| -1.988 | -1.665 | -0.422 | -0.515 | 0.093  |
| -0.071 | 0.387  | -0.353 | -0.221 | -0.132 |
| -3.185 | -2.795 | 0.358  | 0.306  | 0.051  |
| -0.984 | -0.588 | -0.556 | -0.499 | -0.057 |
| 2.618  | 2.266  | 0.222  | -0.006 | 0.228  |
| 0.921  | 0.925  | -0.463 | -0.539 | 0.075  |
| -0.260 | -0.093 | 0.103  | 0.660  | -0.557 |
| -0.288 | -0.153 | -0.167 | -0.710 | 0.542  |
| -0.274 | -0.568 | 0.302  | 0.514  | -0.212 |
| -2.220 | -2.066 | 0.452  | -0.136 | 0.588  |
| -2.025 | -2.198 | -0.157 | -0.055 | -0.102 |
| -0.594 | 0.193  | -0.266 | -0.743 | 0.477  |
| 0.679  | 1.714  | -0.139 | -1.165 | 1.026  |
| -0.565 | -0.251 | -0.353 | -0.634 | 0.280  |
| 1.110  | 0.961  | 0.440  | 0.351  | 0.089  |
| -1.296 | -0.432 | -0.166 | 0.492  | -0.658 |
| 1.455  | 1.368  | -0.186 | -0.062 | -0.124 |
| 1.768  | 1.805  | -0.196 | -0.377 | 0.180  |
| 1.893  | 1.415  | 0.053  | -0.134 | 0.187  |
| 2.398  | 1.954  | -0.173 | 0.222  | -0.395 |
| -0.371 | 0.213  | 0.194  | -0.423 | 0.617  |
| -0.293 | -0.058 | 0.032  | 0.029  | 0.004  |
| 0.029  | 0.062  | 0.189  | -0.226 | 0.415  |
| 1.395  | 1.132  | 0.233  | 0.066  | 0.167  |
| 1.078  | 0.323  | 0.574  | 0.442  | 0.132  |
| -1.951 | -2.945 | -0.167 | 0.297  | -0.464 |
| 0.727  | 1.014  | -0.807 | -0.046 | -0.762 |
| -1.190 | -0.821 | -0.163 | -0.047 | -0.116 |
| -3.280 | -2.351 | 0.396  | -0.729 | 1.125  |
| 1.078  | 0.703  | -0.029 | 0.109  | -0.139 |
| 0.955  | 0.278  | 0.188  | 0.287  | -0.099 |
| 0.583  | 1.124  | 0.271  | -0.506 | 0.778  |
| -0.888 | -0.688 | -0.457 | 0.112  | -0.569 |
| -1.863 | -1.212 | 0.102  | -0.076 | 0.178  |
| 0.347  | 0.467  | 0.242  | -0.631 | 0.873  |
| -2.268 | -2.276 | 0.121  | -0.505 | 0.626  |
| -1.800 | -1.205 | -0.006 | -1.193 | 1.188  |
| -1.996 | -1.417 | 0.541  | -0.240 | 0.781  |
| -1.513 | -2.031 | -0.200 | -0.281 | 0.081  |
| 1.730  | 0.132  | 0.275  | 0.323  | -0.048 |
| 0.430  | 0.876  | -0.025 | -0.484 | 0.459  |
| 0.236  | -0.536 | 0.474  | 0.126  | 0.348  |
| 0.889  | 1.421  | -0.051 | 0.243  | -0.294 |
| 0.435  | 0.777  | 0.141  | -0.161 | 0.301  |
| 1.361  | 1.302  | 0.513  | -0.246 | 0.759  |
| 3.140  | 3.133  | 0.638  | -0.052 | 0.690  |
| 0.948  | 1.333  | 0.097  | -0.415 | 0.511  |

|        |        |        |        |        |
|--------|--------|--------|--------|--------|
| 0.115  | 0.946  | -0.390 | -0.020 | -0.370 |
| 2.845  | 2.195  | 0.192  | -0.034 | 0.227  |
| 0.114  | 0.471  | -0.365 | 0.256  | -0.620 |
| 0.272  | 0.270  | 0.348  | -0.268 | 0.615  |
| 0.633  | 0.769  | 0.206  | 0.132  | 0.075  |
| 2.221  | 0.824  | 1.010  | 0.575  | 0.435  |
| 1.040  | 1.615  | 0.681  | 0.564  | 0.116  |
| 0.789  | -0.380 | 0.250  | 0.259  | -0.009 |
| 0.119  | -0.531 | -0.217 | 0.313  | -0.529 |
| 0.437  | 0.367  | 0.328  | 0.295  | 0.034  |
| 0.687  | 1.256  | 0.391  | 0.213  | 0.178  |
| 0.616  | 0.346  | -0.041 | -0.351 | 0.310  |
| -1.055 | -0.235 | -0.090 | -0.196 | 0.106  |
| -2.965 | -2.097 | -1.159 | -0.699 | -0.459 |
| 0.013  | 0.332  | 0.499  | -0.116 | 0.615  |
| 3.181  | 2.512  | 0.382  | 0.432  | -0.050 |
| 0.533  | -0.267 | 0.265  | 0.532  | -0.267 |
| -0.151 | -0.246 | 0.062  | 0.026  | 0.036  |
| 2.012  | 0.915  | 0.637  | 0.283  | 0.354  |
| 1.017  | 0.054  | -0.097 | -0.157 | 0.060  |
| 1.432  | 1.290  | 0.490  | 0.306  | 0.184  |
| 0.795  | 0.670  | 0.283  | -0.392 | 0.675  |
| -0.236 | 0.736  | -0.121 | 0.120  | -0.241 |
| -0.479 | -0.318 | -0.178 | 0.353  | -0.531 |
| 1.621  | 1.722  | 0.600  | -0.515 | 1.115  |
| -0.363 | 0.370  | -0.183 | -0.256 | 0.073  |
| 0.642  | 0.091  | -0.191 | 0.067  | -0.258 |
| 0.821  | 0.332  | -0.135 | -0.356 | 0.221  |
| 1.209  | 1.433  | 0.508  | 0.365  | 0.144  |
| 0.610  | 0.934  | 0.175  | -0.068 | 0.243  |
| 0.232  | 0.680  | 0.122  | -0.080 | 0.202  |
| 0.203  | 0.545  | 0.004  | -0.784 | 0.787  |
| 0.029  | 0.533  | 0.020  | -0.644 | 0.664  |
| 1.025  | 1.135  | 0.660  | -0.302 | 0.963  |
| 1.610  | 1.165  | 0.524  | 0.302  | 0.222  |
| -0.835 | -0.424 | 0.044  | -0.657 | 0.702  |
| -1.646 | -0.860 | -0.044 | -0.565 | 0.521  |
| -0.366 | -0.241 | 0.470  | 0.707  | -0.237 |
| 1.800  | 1.070  | 0.395  | 1.022  | -0.627 |
| -0.518 | -0.852 | -0.150 | -0.278 | 0.128  |
| -0.832 | -0.483 | 0.264  | -0.072 | 0.336  |
| -2.967 | -2.506 | -0.283 | -0.477 | 0.194  |
| -0.970 | -1.098 | 0.365  | -0.094 | 0.460  |
| -2.067 | -1.475 | -0.360 | -0.247 | -0.113 |
| -1.059 | -1.731 | 0.045  | 0.242  | -0.197 |
| -4.234 | -3.611 | -2.449 | -0.304 | -2.145 |
| 3.017  | 2.750  | 0.729  | -0.103 | 0.833  |
| -0.206 | -1.262 | 0.010  | 0.240  | -0.230 |
| 0.124  | 0.365  | -0.299 | -0.172 | -0.127 |
| -1.187 | -1.492 | 0.405  | 0.084  | 0.321  |
| 1.391  | 1.100  | 0.330  | 0.184  | 0.146  |

|        |        |        |        |        |
|--------|--------|--------|--------|--------|
| -0.018 | -0.215 | 0.007  | 0.306  | -0.299 |
| -0.791 | -0.013 | -0.593 | -0.293 | -0.301 |
| 1.992  | 1.108  | 0.362  | -0.059 | 0.421  |
| -1.515 | -1.288 | 0.209  | -0.134 | 0.344  |
| -1.148 | -0.822 | 0.816  | -0.152 | 0.968  |
| -0.936 | -0.749 | 0.705  | -0.620 | 1.324  |
| 1.378  | -0.088 | 0.298  | 0.153  | 0.145  |
| -2.137 | -1.613 | 0.107  | -0.336 | 0.443  |
| 0.788  | -0.749 | -0.851 | -0.184 | -0.667 |
| 2.071  | 0.762  | 0.341  | -0.298 | 0.639  |
| -0.422 | -0.406 | -0.354 | -0.180 | -0.173 |
| 1.246  | -0.107 | 0.134  | 0.169  | -0.035 |
| 2.603  | 1.583  | -0.074 | 0.042  | -0.116 |
| -2.363 | -1.832 | -0.387 | -0.566 | 0.179  |
| 1.510  | 1.422  | 0.398  | 0.257  | 0.141  |
| -0.244 | -1.302 | -1.310 | -0.745 | -0.565 |
| 1.177  | 1.292  | 0.652  | 0.032  | 0.620  |
| 0.910  | 0.951  | 0.348  | 0.143  | 0.205  |
| -0.540 | 0.067  | -0.170 | 0.055  | -0.225 |
| 3.200  | 2.789  | -0.547 | -0.178 | -0.369 |
| 2.998  | 2.357  | -0.494 | -0.709 | 0.215  |
| 0.722  | 0.983  | -0.986 | -0.879 | -0.107 |
| -0.395 | 0.129  | 0.073  | -0.282 | 0.355  |
| -2.645 | -2.901 | -0.588 | -0.408 | -0.180 |
| -0.163 | -0.636 | 0.094  | 0.298  | -0.204 |
| -1.597 | -1.446 | 0.131  | -0.693 | 0.823  |
| 0.078  | 0.460  | -0.176 | -0.437 | 0.261  |
| 1.507  | 1.430  | 0.584  | 0.073  | 0.511  |
| -0.961 | -1.573 | 0.455  | 0.034  | 0.421  |
| 2.715  | 2.492  | 0.045  | 0.080  | -0.036 |
| 1.606  | 1.126  | -0.600 | -0.372 | -0.228 |
| -0.854 | -1.484 | 0.148  | 0.022  | 0.127  |
| -0.321 | -0.804 | -0.254 | -0.244 | -0.010 |
| -2.186 | -1.912 | -0.189 | -0.844 | 0.655  |
| 0.846  | 1.799  | -0.384 | -0.291 | -0.093 |
| -1.780 | -1.561 | -0.137 | -0.177 | 0.040  |
| 1.125  | 1.486  | 0.324  | -0.174 | 0.498  |
| -1.161 | -0.969 | 0.049  | 0.141  | -0.092 |
| -2.399 | -2.363 | -0.197 | -0.077 | -0.120 |
| -0.892 | -0.503 | 0.396  | -0.289 | 0.685  |
| -2.821 | -2.256 | -0.256 | -0.634 | 0.378  |
| 1.663  | 1.107  | 0.076  | -0.231 | 0.307  |
| -1.378 | -0.684 | -0.305 | -0.105 | -0.200 |
| -0.253 | 0.287  | 0.152  | -0.365 | 0.517  |
| -3.193 | -2.749 | -0.325 | -1.087 | 0.762  |
| 2.340  | 2.091  | 0.116  | -0.173 | 0.290  |
| -2.486 | -1.386 | 0.152  | -0.119 | 0.271  |
| 1.909  | 1.914  | 1.493  | 0.709  | 0.784  |
| -0.266 | -0.417 | 0.008  | 0.458  | -0.451 |
| -3.203 | -1.874 | -0.055 | -0.088 | 0.033  |
| -0.756 | -0.402 | 0.001  | -0.443 | 0.444  |



|        |        |        |        |        |
|--------|--------|--------|--------|--------|
| 0.431  | 0.841  | 0.220  | -0.339 | 0.559  |
| -0.191 | 0.022  | 0.403  | -0.486 | 0.889  |
| -2.915 | -2.327 | -0.207 | -0.316 | 0.110  |
| 2.016  | 0.984  | 0.257  | 0.381  | -0.124 |
| 2.222  | 1.662  | -0.613 | -0.072 | -0.541 |
| -3.790 | -3.472 | -0.248 | 0.182  | -0.430 |
| -0.178 | -0.205 | 0.970  | 0.535  | 0.435  |
| -0.375 | -0.944 | 0.396  | 0.436  | -0.039 |
| -0.557 | -1.235 | 0.417  | 0.564  | -0.147 |
| -0.169 | -0.771 | 0.082  | 0.230  | -0.148 |
| -0.535 | -0.785 | 0.221  | -0.059 | 0.280  |
| 0.767  | 0.298  | 0.392  | 0.170  | 0.222  |
| 0.438  | 0.446  | -0.053 | 0.125  | -0.178 |
| 0.016  | -0.500 | 1.335  | 0.610  | 0.725  |
| 0.920  | -0.047 | -0.027 | 0.226  | -0.253 |
| 1.495  | 1.307  | -0.475 | -0.090 | -0.386 |
| 0.872  | 1.036  | -0.009 | -0.402 | 0.392  |
| 0.980  | 0.281  | -1.427 | -0.364 | -1.063 |
| -1.497 | -0.904 | 0.138  | 0.278  | -0.140 |
| -1.253 | -1.002 | 0.256  | -0.597 | 0.852  |
| 1.269  | 0.248  | 0.002  | 0.088  | -0.085 |
| 0.938  | -0.610 | -0.288 | 0.335  | -0.623 |
| -0.902 | -0.746 | 0.186  | -0.075 | 0.261  |
| 0.429  | -0.556 | 0.305  | -0.434 | 0.740  |
| -0.979 | -1.401 | 0.546  | -0.027 | 0.573  |
| -0.560 | -0.215 | 0.306  | 0.000  | 0.306  |
| -0.313 | -0.287 | 0.496  | -0.763 | 1.259  |
| -1.263 | -1.651 | 0.792  | 0.476  | 0.316  |
| 1.331  | 1.191  | -0.507 | -0.883 | 0.376  |
| -0.319 | -0.179 | -0.003 | -0.444 | 0.441  |
| -0.447 | -0.305 | 0.735  | 0.538  | 0.198  |
| 0.973  | 0.340  | -0.200 | 0.005  | -0.205 |
| 2.849  | 2.687  | -0.317 | 0.057  | -0.374 |
| 1.308  | 0.856  | 0.270  | -0.213 | 0.483  |
| -1.487 | -2.463 | 0.482  | 0.419  | 0.063  |
| -0.834 | -0.277 | 0.005  | -0.318 | 0.323  |
| 1.351  | 1.352  | 0.097  | 0.071  | 0.026  |
| -0.842 | -0.881 | -0.658 | -0.407 | -0.252 |
| 0.469  | -0.028 | 0.444  | 0.286  | 0.158  |
| 2.472  | 1.919  | 0.363  | 0.178  | 0.186  |
| -0.286 | 0.450  | -1.250 | -0.724 | -0.527 |
| -1.145 | -1.077 | 0.439  | -0.083 | 0.522  |
| -1.989 | -1.826 | 0.332  | -0.606 | 0.937  |
| -1.613 | -1.253 | -0.293 | -0.201 | -0.092 |
| 0.171  | 0.723  | -0.164 | 0.208  | -0.372 |
| -0.810 | -0.398 | -0.395 | 0.539  | -0.934 |
| 0.016  | 0.382  | 1.100  | -0.435 | 1.535  |
| -0.583 | -0.153 | 0.209  | 0.119  | 0.090  |
| 0.293  | 2.081  | 0.093  | 0.796  | -0.704 |
| 1.294  | 1.727  | 0.733  | 0.275  | 0.458  |
| 1.269  | 0.357  | 0.366  | 0.041  | 0.325  |

|        |        |        |        |        |
|--------|--------|--------|--------|--------|
| -0.008 | -0.965 | 0.190  | -0.255 | 0.445  |
| -1.431 | -0.743 | 0.360  | 0.228  | 0.132  |
| -1.313 | -0.353 | 0.151  | -0.245 | 0.397  |
| -0.681 | -0.258 | 0.151  | 0.032  | 0.119  |
| 0.106  | -0.251 | -0.178 | -0.460 | 0.282  |
| 0.644  | 0.110  | 0.071  | -0.248 | 0.318  |
| 0.301  | -0.205 | 0.240  | 0.206  | 0.034  |
| 0.390  | 0.982  | 0.436  | 0.176  | 0.260  |
| -1.859 | -0.651 | 0.002  | -0.257 | 0.259  |
| 0.588  | 0.910  | 0.305  | 0.018  | 0.286  |
| 2.104  | 2.101  | -0.140 | 0.072  | -0.212 |
| 0.436  | 0.595  | 0.589  | 0.342  | 0.246  |
| 1.649  | 1.223  | 0.010  | -0.332 | 0.342  |
| 2.546  | 2.277  | -0.805 | -1.126 | 0.322  |
| -1.097 | -0.967 | -0.034 | 0.107  | -0.141 |
| -0.639 | -1.174 | -0.444 | 0.151  | -0.594 |
| -0.200 | 0.376  | 0.077  | -0.207 | 0.284  |
| -1.884 | -3.427 | 0.241  | 0.778  | -0.537 |
| -2.074 | -1.795 | 0.065  | -0.408 | 0.472  |
| 0.443  | -0.992 | -1.676 | -0.291 | -1.385 |
| 0.117  | -0.491 | -0.872 | -0.580 | -0.292 |
| -0.679 | -0.753 | 0.101  | -0.098 | 0.199  |
| -0.581 | -1.128 | 0.326  | 0.751  | -0.426 |
| -4.018 | -3.887 | -0.454 | -0.147 | -0.307 |
| -2.192 | -1.410 | 0.125  | -0.010 | 0.135  |
| 2.047  | 1.846  | 0.223  | 0.036  | 0.187  |
| -1.208 | -1.224 | -0.569 | -0.210 | -0.359 |
| 0.596  | 0.537  | 0.798  | 0.341  | 0.457  |
| 0.148  | -0.881 | -0.542 | 0.017  | -0.559 |
| -2.729 | -2.177 | -0.159 | -0.667 | 0.508  |
| -0.557 | -1.114 | 0.694  | 0.211  | 0.483  |
| -0.452 | -0.894 | 0.774  | -0.266 | 1.040  |
| -2.807 | -2.725 | 0.224  | 0.038  | 0.186  |
| -1.055 | -0.427 | 0.332  | -0.549 | 0.881  |
| 0.176  | -0.001 | -0.010 | 0.114  | -0.124 |
| 0.199  | -0.286 | -0.063 | -0.031 | -0.032 |
| -3.440 | -2.830 | 0.051  | -0.136 | 0.186  |
| -0.427 | 0.067  | 0.198  | 0.017  | 0.181  |
| -0.946 | -0.651 | -0.011 | -0.434 | 0.422  |
| -1.310 | -1.258 | -0.056 | -0.117 | 0.061  |
| -1.488 | -1.129 | 0.209  | 0.274  | -0.065 |
| 0.319  | 0.777  | 0.374  | -0.190 | 0.564  |
| 1.712  | 1.357  | 0.213  | 0.399  | -0.187 |
| -0.670 | -1.235 | -0.871 | -0.379 | -0.492 |
| 0.040  | 0.518  | 0.656  | -0.197 | 0.853  |
| -2.200 | -1.757 | -0.568 | -0.097 | -0.472 |
| -2.593 | -1.658 | 0.518  | -0.374 | 0.891  |
| -1.416 | -0.740 | 0.006  | -0.395 | 0.402  |
| -1.416 | -2.312 | 0.284  | 0.740  | -0.456 |
| -1.457 | -0.923 | 0.184  | 0.589  | -0.405 |
| 0.592  | 0.180  | -0.105 | 0.173  | -0.278 |

|        |        |        |        |        |
|--------|--------|--------|--------|--------|
| 0.656  | 1.013  | 0.113  | 0.150  | -0.037 |
| -1.237 | -0.532 | -0.211 | 0.102  | -0.313 |
| -1.490 | -1.975 | 0.031  | 0.347  | -0.316 |
| -0.953 | -1.582 | -0.476 | -0.122 | -0.354 |
| -0.586 | -0.922 | -0.107 | -0.134 | 0.028  |
| -3.658 | -2.829 | -0.311 | 0.225  | -0.536 |
| 1.714  | -0.028 | 0.555  | 0.360  | 0.196  |
| -0.024 | 0.205  | 0.208  | -0.366 | 0.573  |
| -1.384 | -1.157 | -0.234 | -0.237 | 0.004  |
| 1.173  | 0.795  | 0.648  | -0.494 | 1.143  |
| 1.096  | 1.166  | 0.117  | 0.144  | -0.027 |
| -1.438 | -0.671 | -0.089 | -0.241 | 0.152  |
| -1.695 | -0.949 | 0.258  | 0.606  | -0.348 |
| 1.066  | 0.268  | 0.822  | 0.626  | 0.196  |
| -3.325 | -2.981 | -0.228 | 0.707  | -0.935 |
| -0.735 | 0.367  | 0.239  | 0.782  | -0.543 |
| -2.880 | -3.019 | -0.091 | -0.182 | 0.091  |
| -2.341 | -2.414 | -0.130 | -0.792 | 0.662  |
| -3.617 | -2.967 | -0.456 | -0.091 | -0.365 |
| -0.326 | -0.904 | 0.420  | -0.110 | 0.530  |
| -0.872 | -1.180 | 0.360  | -0.357 | 0.716  |
| -0.908 | -1.298 | 0.271  | 0.248  | 0.023  |
| -3.605 | -3.425 | 0.221  | -0.011 | 0.233  |
| -1.412 | -1.710 | 0.111  | -0.443 | 0.554  |
| -1.619 | -1.277 | -1.752 | 0.545  | -2.297 |
| -0.038 | -0.780 | -0.095 | -0.059 | -0.036 |
| 0.803  | 0.834  | 0.601  | 0.028  | 0.574  |
| 0.031  | -0.073 | -0.540 | -0.211 | -0.329 |
| -1.799 | -0.975 | -0.184 | -0.914 | 0.729  |
| -1.172 | -1.668 | -0.728 | -0.214 | -0.514 |
| 0.030  | 0.424  | 0.326  | -0.172 | 0.499  |
| -1.866 | -2.235 | -0.109 | -0.243 | 0.134  |
| -0.189 | 0.142  | 0.350  | -0.126 | 0.476  |
| -3.251 | -2.666 | 0.149  | -0.140 | 0.290  |
| -1.723 | -1.701 | 0.038  | 0.173  | -0.135 |
| 1.229  | 1.618  | 0.452  | 0.311  | 0.141  |
| 1.251  | 1.846  | 0.220  | 0.084  | 0.135  |
| -0.825 | -1.561 | -0.325 | -0.646 | 0.321  |
| 1.393  | 1.863  | 0.324  | -0.232 | 0.556  |
| -2.198 | -1.396 | -0.120 | -0.214 | 0.093  |
| -3.648 | -3.523 | -0.033 | 0.097  | -0.131 |
| -0.481 | -0.698 | 0.279  | 0.411  | -0.132 |
| -2.943 | -2.853 | -0.056 | 0.176  | -0.232 |
| -0.009 | -1.562 | -0.071 | 0.208  | -0.279 |
| -0.839 | -0.911 | -0.106 | -0.254 | 0.148  |
| 2.226  | 1.093  | -0.437 | 0.129  | -0.567 |
| 1.050  | 1.030  | 0.026  | -0.039 | 0.066  |
| 1.202  | 0.467  | -0.159 | 0.071  | -0.230 |
| -0.847 | -1.103 | 0.255  | -0.115 | 0.370  |
| 1.351  | -0.005 | -0.052 | -0.012 | -0.040 |
| 0.319  | 0.275  | -0.395 | -0.201 | -0.194 |

|        |        |        |        |        |
|--------|--------|--------|--------|--------|
| -0.679 | -0.998 | -0.417 | -0.187 | -0.229 |
| 1.186  | 1.161  | -0.978 | -0.566 | -0.412 |
| 1.278  | 0.254  | 0.185  | -0.173 | 0.358  |
| 1.870  | 2.009  | 0.051  | -0.333 | 0.384  |
| -4.698 | -4.160 | 0.374  | -0.519 | 0.894  |
| -3.015 | -2.269 | -0.229 | -0.399 | 0.170  |
| -1.148 | -1.886 | -0.151 | -0.251 | 0.101  |
| 0.133  | 0.568  | -0.239 | 0.076  | -0.315 |
| 0.670  | 0.284  | 0.175  | 0.149  | 0.027  |
| 1.406  | 1.393  | -0.533 | -0.174 | -0.359 |
| 0.935  | 0.694  | -0.196 | 0.295  | -0.491 |
| -0.337 | -0.782 | -0.067 | 0.169  | -0.236 |
| 2.795  | 2.814  | 0.246  | 0.463  | -0.218 |
| -1.772 | -1.127 | 0.002  | 0.392  | -0.390 |
| 1.593  | 0.327  | 0.595  | 0.659  | -0.064 |
| 1.150  | 0.195  | 0.291  | 0.482  | -0.191 |
| 1.715  | 0.379  | 0.471  | 0.862  | -0.391 |
| 0.644  | 0.596  | 0.105  | 0.250  | -0.145 |
| 1.502  | 0.681  | 0.228  | 0.504  | -0.276 |
| -0.115 | -0.617 | 0.216  | -0.005 | 0.221  |
| 0.103  | 0.405  | 0.154  | -0.161 | 0.315  |
| 2.807  | 2.363  | 0.468  | 0.080  | 0.388  |
| -0.438 | 0.075  | 0.339  | 0.145  | 0.194  |
| -3.070 | -2.481 | -0.151 | -0.278 | 0.127  |
| -2.302 | -1.919 | 1.475  | 0.316  | 1.159  |
| 0.828  | 0.246  | 0.613  | 0.046  | 0.567  |
| -0.766 | -1.249 | 0.292  | 0.478  | -0.186 |
| -0.816 | -1.176 | -0.106 | 0.246  | -0.352 |
| -1.881 | -1.188 | 0.203  | -0.523 | 0.726  |
| 0.360  | 0.028  | 0.449  | 0.478  | -0.029 |
| -0.532 | -0.962 | 0.485  | 0.139  | 0.346  |
| -1.472 | -1.721 | 0.240  | -0.699 | 0.939  |
| -2.390 | -2.677 | -0.086 | -0.220 | 0.134  |
| 0.144  | 0.335  | 0.203  | -0.323 | 0.526  |
| -0.214 | -0.098 | 0.105  | -0.529 | 0.634  |
| -1.248 | -0.856 | -0.380 | -0.769 | 0.389  |
| -4.428 | -2.722 | -0.726 | -0.983 | 0.257  |
| 0.025  | -1.233 | -0.137 | -0.053 | -0.084 |
| -2.174 | -1.711 | 0.299  | -0.120 | 0.420  |
| -2.013 | -1.685 | 0.132  | 0.089  | 0.043  |
| -0.911 | -2.115 | -0.039 | 0.388  | -0.428 |
| -2.246 | -2.590 | 0.369  | 0.106  | 0.263  |
| -1.505 | -2.052 | 0.183  | 0.338  | -0.155 |
| 0.601  | -0.946 | -0.347 | 0.067  | -0.414 |
| -0.921 | -1.393 | -0.205 | -0.405 | 0.200  |
| 0.925  | 0.442  | -0.136 | 0.612  | -0.747 |
| 0.418  | -0.807 | -0.179 | 0.646  | -0.825 |
| -0.689 | -1.276 | 0.243  | 0.154  | 0.089  |
| 1.100  | -0.776 | 0.221  | 0.142  | 0.079  |
| 0.542  | 0.628  | 0.259  | 0.113  | 0.146  |
| 1.469  | 0.845  | 0.408  | 0.273  | 0.134  |

|        |        |        |        |        |
|--------|--------|--------|--------|--------|
| 1.420  | -0.234 | 0.589  | 0.455  | 0.134  |
| 1.812  | 0.693  | -0.010 | 0.225  | -0.235 |
| -0.042 | -0.294 | 0.245  | -0.120 | 0.365  |
| 1.927  | 2.916  | 0.016  | -0.039 | 0.055  |
| 0.683  | 1.600  | -0.339 | -0.638 | 0.299  |
| -1.473 | -1.297 | -0.462 | -0.711 | 0.249  |
| 0.614  | -0.060 | 1.210  | 0.532  | 0.678  |
| 1.769  | 1.533  | 0.481  | 0.228  | 0.253  |
| -0.788 | -0.079 | 0.420  | -0.464 | 0.884  |
| -0.051 | -0.022 | 0.752  | 0.549  | 0.203  |
| 1.426  | 1.317  | -0.080 | -0.044 | -0.036 |
| -1.727 | -0.820 | -0.043 | -0.266 | 0.223  |
| -0.778 | -0.446 | 0.171  | 0.049  | 0.122  |
| -0.320 | -0.372 | 0.297  | -0.478 | 0.775  |
| -1.158 | -0.264 | -0.051 | -0.475 | 0.424  |
| -1.151 | -1.506 | -0.138 | -0.037 | -0.100 |
| -0.993 | -0.671 | 0.124  | -0.307 | 0.431  |
| 1.186  | 1.019  | 0.504  | 0.066  | 0.438  |
| 0.661  | 1.069  | 0.025  | 0.002  | 0.023  |
| 0.849  | 0.849  | 0.257  | 0.421  | -0.164 |
| -1.734 | -1.306 | -0.102 | 0.510  | -0.613 |
| -3.008 | -1.454 | 0.199  | 0.650  | -0.451 |
| -2.473 | -1.998 | -0.078 | -0.788 | 0.710  |
| -0.172 | -0.622 | 0.075  | 0.069  | 0.006  |
| 0.267  | 0.256  | -0.042 | -0.216 | 0.175  |
| -0.313 | 0.305  | -0.001 | -0.303 | 0.302  |
| -1.446 | -1.208 | 0.080  | -0.602 | 0.683  |
| -2.839 | -2.277 | 0.548  | -0.285 | 0.833  |
| -2.176 | -1.695 | -0.257 | -0.285 | 0.028  |
| -1.097 | -1.415 | -0.128 | 0.201  | -0.329 |
| 0.299  | 0.561  | 0.147  | -0.575 | 0.722  |
| -3.085 | -2.563 | -0.003 | 0.018  | -0.021 |
| -3.986 | -3.385 | -0.040 | -0.950 | 0.910  |
| 1.247  | 1.081  | 0.007  | 0.098  | -0.090 |
| 2.966  | 2.708  | 0.330  | 0.409  | -0.079 |
| 1.727  | 1.967  | 0.524  | 0.053  | 0.471  |
| -0.162 | -0.812 | 0.326  | -0.044 | 0.371  |
| -2.484 | -2.157 | 0.003  | -0.535 | 0.538  |
| -2.064 | -1.467 | 0.518  | -0.456 | 0.974  |
| -1.279 | -1.052 | -0.194 | -0.552 | 0.358  |
| -1.876 | -1.584 | -0.035 | -1.253 | 1.218  |
| 1.164  | 1.102  | 0.072  | -0.134 | 0.206  |
| -3.328 | -2.528 | 0.376  | -0.655 | 1.031  |
| -1.260 | -0.345 | -0.549 | -0.515 | -0.034 |
| -4.069 | -3.632 | 0.187  | -0.603 | 0.789  |
| -0.814 | -1.437 | -0.096 | 0.411  | -0.507 |
| 0.054  | -0.743 | 0.513  | 0.399  | 0.114  |
| 2.778  | 2.583  | 0.004  | 0.449  | -0.445 |
| -1.386 | -0.834 | -0.414 | -0.208 | -0.206 |
| 1.160  | 0.487  | -0.345 | -0.008 | -0.338 |
| -0.079 | 0.213  | 0.326  | 0.282  | 0.044  |

|        |        |        |        |        |
|--------|--------|--------|--------|--------|
| 0.781  | -0.573 | 0.234  | 0.267  | -0.033 |
| -0.481 | -0.973 | 0.349  | 0.468  | -0.119 |
| -0.749 | -1.021 | 0.045  | -0.008 | 0.052  |
| -0.122 | -0.141 | 0.276  | 0.211  | 0.065  |
| 0.597  | 1.050  | -0.240 | -0.545 | 0.305  |
| -0.688 | -0.522 | 0.016  | -0.438 | 0.454  |
| 0.349  | 0.398  | -0.152 | 0.037  | -0.189 |
| 1.487  | 0.625  | 0.504  | 0.575  | -0.071 |
| 1.145  | 0.439  | -0.457 | -0.436 | -0.021 |
| 0.851  | 0.063  | 0.161  | -0.077 | 0.237  |
| 0.405  | -0.031 | 0.095  | -0.119 | 0.215  |
| 1.227  | 0.922  | -0.022 | -0.255 | 0.234  |
| 2.072  | 1.190  | -0.499 | -0.705 | 0.206  |
| 1.817  | 1.340  | 0.579  | 0.520  | 0.060  |
| 0.265  | -1.139 | -0.031 | 0.485  | -0.515 |
| 1.494  | 0.770  | 0.328  | 0.582  | -0.253 |
| 0.707  | 0.906  | 0.227  | -0.339 | 0.566  |
| 0.219  | 0.824  | -0.640 | -0.659 | 0.019  |
| 1.131  | -0.103 | 0.390  | 0.607  | -0.218 |
| 3.536  | 2.053  | 0.338  | 0.323  | 0.016  |
| -1.302 | -1.388 | -0.166 | -0.023 | -0.143 |
| 0.363  | 0.461  | 0.565  | -0.003 | 0.568  |
| 0.971  | 0.787  | -0.052 | -0.287 | 0.234  |
| 2.002  | 1.887  | -0.097 | -0.061 | -0.036 |
| 1.223  | 0.797  | 0.243  | -0.178 | 0.421  |
| 0.309  | -0.462 | 0.393  | 0.057  | 0.337  |
| 0.809  | 0.429  | -0.108 | -0.056 | -0.052 |
| 1.398  | 0.886  | 0.596  | 0.588  | 0.008  |
| -0.438 | -0.471 | 0.164  | 0.102  | 0.062  |
| -0.946 | -0.583 | 0.084  | -0.025 | 0.108  |
| 1.026  | 0.237  | -0.331 | -0.015 | -0.316 |
| 1.426  | 1.437  | 0.409  | 0.393  | 0.016  |
| 1.888  | 1.601  | 0.293  | 0.070  | 0.223  |
| -0.162 | 0.290  | 0.093  | 0.382  | -0.289 |
| -0.663 | -1.321 | 0.119  | 0.754  | -0.635 |
| 1.831  | 1.193  | 0.112  | 0.836  | -0.724 |
| 2.958  | 1.672  | 0.486  | 0.451  | 0.035  |
| 1.255  | 0.846  | 0.030  | 0.014  | 0.016  |
| -3.791 | -3.747 | -0.006 | -0.407 | 0.401  |
| -2.389 | -2.100 | -0.126 | 0.512  | -0.638 |
| 0.499  | -0.402 | 0.336  | 0.078  | 0.259  |
| -1.114 | -1.157 | -0.192 | -0.007 | -0.185 |
| 1.570  | 0.720  | 0.414  | 1.121  | -0.707 |
| -0.328 | -1.048 | 0.057  | 0.154  | -0.097 |
| 0.208  | 1.282  | 0.220  | 0.210  | 0.010  |
| -2.039 | -1.763 | -0.137 | -0.130 | -0.007 |
| 1.705  | 1.280  | 0.132  | -0.012 | 0.144  |
| 0.677  | 0.489  | 0.013  | -0.039 | 0.051  |
| -3.266 | -2.870 | 0.062  | -1.069 | 1.131  |
| -0.087 | 0.166  | 0.128  | -0.374 | 0.501  |
| -1.612 | -1.045 | -0.300 | -0.028 | -0.272 |
| -3.398 | -1.237 | -0.204 | -0.507 | 0.303  |

|        |        |        |        |        |
|--------|--------|--------|--------|--------|
| -0.166 | 0.495  | 0.040  | -0.142 | 0.182  |
| -0.830 | -1.712 | -0.116 | -0.057 | -0.059 |
| 0.070  | -1.343 | -0.086 | -0.193 | 0.107  |
| -2.343 | -1.940 | -0.077 | -0.380 | 0.302  |
| 1.935  | 1.474  | 0.318  | 0.247  | 0.071  |
| -1.728 | -1.941 | -0.064 | -0.053 | -0.011 |
| -1.165 | -0.776 | -0.257 | -0.199 | -0.059 |
| -1.274 | -0.703 | 0.034  | 0.179  | -0.146 |
| 0.572  | 0.125  | 0.108  | -0.355 | 0.463  |
| 1.687  | 2.788  | -0.544 | -0.289 | -0.254 |
| -3.123 | -2.965 | -0.740 | -0.455 | -0.285 |
| -2.759 | -1.755 | -1.778 | -0.835 | -0.944 |
| -1.042 | -0.687 | 0.121  | 0.057  | 0.065  |
| -0.225 | -0.577 | 0.081  | 0.162  | -0.081 |
| -2.113 | -1.485 | 0.700  | 0.162  | 0.539  |
| 0.728  | 0.685  | 0.000  | 0.429  | -0.429 |
| 0.192  | 0.952  | 0.018  | 0.430  | -0.413 |
| 2.428  | 1.791  | 0.433  | 0.462  | -0.029 |
| -1.343 | -0.931 | -0.728 | -0.099 | -0.630 |
| -1.807 | -1.503 | 0.293  | 0.273  | 0.020  |
| -1.629 | -2.003 | 0.445  | -0.020 | 0.466  |
| 1.092  | 1.231  | -0.088 | 0.214  | -0.303 |
| 1.719  | 1.810  | 0.044  | -0.142 | 0.186  |
| -1.084 | 1.441  | -0.260 | -1.136 | 0.876  |
| 1.626  | 1.455  | 0.184  | 0.756  | -0.572 |
| 1.270  | 0.376  | 0.701  | 0.320  | 0.381  |
| 0.627  | 0.581  | -0.980 | -1.127 | 0.147  |
| -0.510 | -0.279 | 0.273  | 0.081  | 0.193  |
| -1.910 | -1.065 | -0.437 | -0.521 | 0.084  |
| 0.328  | 0.334  | -0.679 | 0.143  | -0.822 |
| -0.967 | -0.615 | -0.547 | -0.463 | -0.084 |
| 1.156  | 1.565  | -0.346 | -0.573 | 0.227  |
| 1.040  | 0.761  | 0.101  | 0.231  | -0.130 |
| -2.504 | -3.360 | -0.305 | -0.837 | 0.532  |
| -2.177 | -2.361 | 0.200  | 0.257  | -0.057 |
| 1.883  | 2.111  | -0.271 | 0.298  | -0.569 |
| 2.042  | 1.723  | 0.400  | 0.558  | -0.158 |
| -0.228 | 0.438  | 0.489  | 0.134  | 0.355  |
| 0.579  | -0.382 | 0.166  | 0.803  | -0.637 |
| 1.308  | 0.426  | 0.580  | 0.868  | -0.288 |
| 0.981  | 0.048  | 0.208  | 0.529  | -0.321 |
| 1.194  | 0.972  | 0.163  | 0.330  | -0.167 |
| 1.872  | 1.945  | 0.356  | 0.582  | -0.226 |
| -2.029 | -1.489 | -0.109 | -0.004 | -0.105 |
| -1.793 | -2.182 | 0.097  | 0.245  | -0.148 |
| -0.392 | -0.154 | 0.103  | -0.177 | 0.279  |
| -1.035 | -0.455 | 0.158  | -0.541 | 0.699  |
| -1.789 | -1.508 | 0.401  | -0.388 | 0.789  |
| 0.102  | -0.075 | 0.483  | 0.143  | 0.340  |
| -0.726 | -0.534 | 0.200  | -0.378 | 0.578  |
| 0.070  | -0.713 | 0.427  | 0.560  | -0.133 |

|        |        |        |        |        |
|--------|--------|--------|--------|--------|
| -1.283 | -1.811 | 0.512  | 0.616  | -0.105 |
| -1.236 | -1.879 | -0.023 | 0.050  | -0.072 |
| 0.859  | 1.117  | 0.039  | -0.271 | 0.310  |
| -0.999 | 0.205  | -0.208 | -0.305 | 0.097  |
| 1.808  | 1.405  | 0.113  | 0.233  | -0.120 |
| 0.937  | 0.323  | 0.115  | 0.293  | -0.178 |
| 0.211  | -0.254 | 0.084  | -0.040 | 0.124  |
| -1.536 | -0.886 | 0.100  | -0.171 | 0.272  |
| -0.395 | -1.555 | 0.135  | 0.410  | -0.275 |
| -1.055 | -0.888 | -0.176 | 0.248  | -0.424 |
| 0.412  | 0.742  | -0.030 | 0.124  | -0.155 |
| 1.963  | 1.055  | 0.407  | 0.119  | 0.288  |
| -2.901 | -2.388 | -0.243 | -0.388 | 0.145  |
| 1.033  | 0.433  | 0.201  | 0.056  | 0.145  |
| 0.093  | -0.785 | 0.148  | -0.088 | 0.236  |
| -0.771 | -1.723 | 0.255  | 0.176  | 0.080  |
| -1.313 | -0.950 | -0.258 | -0.246 | -0.012 |
| 0.939  | 0.555  | 0.163  | 0.312  | -0.149 |
| -0.417 | -1.233 | -0.420 | -0.175 | -0.245 |
| 1.196  | 0.933  | -0.003 | 0.327  | -0.330 |
| -0.036 | -0.284 | -0.026 | -0.462 | 0.437  |
| -0.667 | -0.918 | 0.294  | -0.142 | 0.436  |
| -0.273 | -0.212 | -0.244 | 0.179  | -0.422 |
| 0.900  | 0.316  | 0.185  | 0.177  | 0.007  |
| -0.940 | -0.906 | 0.077  | -0.130 | 0.206  |
| 1.089  | 0.363  | 0.612  | 0.258  | 0.354  |
| -0.664 | -0.313 | 0.152  | 0.533  | -0.381 |
| -0.985 | -1.043 | -1.299 | 0.018  | -1.316 |
| 0.143  | -0.047 | 0.685  | 0.096  | 0.589  |
| -1.258 | -1.578 | 0.146  | 0.286  | -0.140 |
| -1.371 | -0.499 | -0.344 | 0.647  | -0.991 |
| -3.048 | -1.319 | -0.146 | -0.598 | 0.451  |
| -2.537 | -2.379 | 0.230  | 0.267  | -0.037 |
| -2.722 | -2.270 | 0.161  | 0.324  | -0.163 |
| -0.456 | -0.061 | -0.102 | 0.134  | -0.237 |
| -2.295 | -1.912 | 0.275  | -0.398 | 0.673  |
| 0.567  | -0.594 | -0.156 | -0.016 | -0.141 |
| 0.177  | 0.067  | -0.098 | -0.242 | 0.143  |
| 1.442  | 0.879  | 0.505  | 0.591  | -0.085 |
| 0.998  | 0.238  | 0.372  | 0.608  | -0.235 |
| -0.547 | -0.474 | -0.071 | -0.101 | 0.030  |
| 1.293  | 0.414  | -0.116 | 0.085  | -0.201 |
| -0.842 | -1.432 | -0.169 | 0.176  | -0.345 |
| -2.602 | -2.145 | 0.173  | -0.144 | 0.317  |
| -2.360 | -1.982 | 0.031  | -0.241 | 0.272  |
| 0.780  | 0.244  | 0.876  | 0.489  | 0.387  |
| 2.190  | 2.008  | -0.097 | -0.096 | -0.001 |
| 1.355  | 1.650  | -0.393 | -0.507 | 0.113  |
| -0.227 | -0.021 | -0.448 | -1.375 | 0.926  |
| 1.551  | 1.323  | 0.119  | 0.051  | 0.068  |
| 1.141  | 0.589  | 0.649  | 0.020  | 0.629  |



|        |        |        |        |        |
|--------|--------|--------|--------|--------|
| 0.719  | 0.417  | 0.127  | 0.469  | -0.342 |
| 1.048  | 0.591  | 0.501  | 0.396  | 0.105  |
| -1.572 | -1.054 | 0.555  | -0.612 | 1.168  |
| 1.170  | 0.242  | 0.238  | 0.286  | -0.049 |
| 0.832  | -0.296 | 0.094  | 0.142  | -0.049 |
| 0.820  | 0.694  | -0.082 | -0.100 | 0.018  |
| -0.137 | 0.110  | 0.130  | -0.441 | 0.570  |
| 0.085  | -0.487 | -0.122 | -0.551 | 0.429  |
| -0.584 | -1.570 | -0.085 | 0.169  | -0.254 |
| 0.096  | -0.924 | -0.427 | -0.184 | -0.242 |
| -0.468 | -0.188 | -0.186 | -0.557 | 0.371  |
| 0.636  | 0.883  | 0.400  | -0.110 | 0.510  |
| -1.006 | -0.605 | -0.209 | -0.211 | 0.002  |
| 1.995  | 1.458  | 0.777  | 0.514  | 0.263  |
| 0.778  | -0.079 | 0.120  | 0.221  | -0.100 |
| -0.799 | -0.238 | -0.030 | -0.179 | 0.149  |
| 2.029  | 2.128  | -0.058 | 0.305  | -0.363 |
| -2.776 | -2.378 | 0.701  | 0.350  | 0.351  |
| 0.363  | 0.552  | 0.138  | -0.356 | 0.494  |
| 0.844  | 0.681  | 0.060  | -0.290 | 0.350  |
| 2.415  | 1.724  | -0.126 | -0.468 | 0.343  |
| 1.911  | 2.213  | 0.394  | 0.370  | 0.025  |
| -0.944 | -0.124 | 0.845  | 0.480  | 0.364  |
| -1.448 | -1.914 | 0.040  | -0.338 | 0.378  |
| -0.906 | -0.147 | 0.069  | 0.228  | -0.159 |
| 0.076  | -1.172 | -0.004 | -0.053 | 0.048  |
| 1.717  | 1.086  | 0.350  | 0.778  | -0.428 |
| -1.098 | -1.305 | 0.014  | 0.234  | -0.220 |
| 0.638  | 0.597  | 0.897  | 0.217  | 0.681  |
| -2.020 | -1.550 | 0.031  | -0.444 | 0.475  |
| -0.335 | -1.085 | 0.407  | 0.564  | -0.157 |
| -0.460 | -1.115 | 0.408  | -0.005 | 0.413  |
| -1.709 | -1.406 | 0.159  | -0.041 | 0.200  |
| 1.957  | 1.988  | 0.028  | 0.392  | -0.364 |
| 1.019  | 1.223  | -0.049 | 0.549  | -0.598 |
| -1.874 | -1.331 | -0.174 | -0.351 | 0.177  |
| -4.008 | -3.349 | -0.037 | -0.745 | 0.708  |
| 0.705  | 1.139  | 0.737  | -0.365 | 1.102  |
| 2.720  | 1.966  | 0.414  | 0.521  | -0.107 |
| -1.097 | -0.760 | 1.153  | 0.516  | 0.637  |
| 0.719  | 1.022  | 0.184  | -0.056 | 0.241  |
| 0.869  | 0.589  | 0.152  | -0.306 | 0.459  |
| 0.927  | 0.810  | 0.617  | -0.235 | 0.853  |
| -1.462 | -0.816 | 0.079  | -0.144 | 0.223  |
| 0.829  | 0.392  | 0.711  | -0.708 | 1.419  |
| 0.965  | 0.513  | 0.313  | -0.103 | 0.416  |
| -0.881 | -0.372 | -1.407 | -0.104 | -1.303 |
| 0.568  | 1.268  | 0.005  | -0.370 | 0.374  |
| -0.321 | 0.457  | 0.257  | -0.157 | 0.414  |
| 1.154  | 0.922  | 0.074  | 0.045  | 0.029  |
| 1.437  | 0.750  | 0.187  | 0.654  | -0.466 |

|        |        |        |        |        |
|--------|--------|--------|--------|--------|
| -1.130 | -0.524 | -0.073 | -0.409 | 0.336  |
| 0.055  | 0.217  | 0.264  | 0.385  | -0.121 |
| -1.428 | -1.708 | -1.158 | -0.692 | -0.466 |
| 0.067  | 0.266  | 0.105  | 0.290  | -0.185 |
| -0.978 | -0.187 | -0.807 | -0.977 | 0.170  |
| 0.515  | 0.746  | 0.172  | -0.591 | 0.763  |
| -2.299 | -2.012 | -0.534 | -0.427 | -0.108 |
| -0.634 | 0.874  | -0.438 | -0.109 | -0.329 |
| -0.215 | -0.199 | 0.018  | 0.325  | -0.308 |
| 0.821  | 0.877  | -0.115 | 0.169  | -0.284 |
| -0.296 | -0.090 | 0.346  | -0.055 | 0.401  |
| 1.875  | 1.608  | 0.046  | -0.563 | 0.609  |
| 2.135  | 0.732  | 0.126  | 0.426  | -0.300 |
| 1.542  | 2.180  | -0.765 | -0.787 | 0.022  |
| 0.442  | 0.608  | -0.895 | -0.581 | -0.314 |
| -1.156 | -0.730 | 0.579  | -0.194 | 0.774  |
| -0.560 | -0.338 | 0.330  | -0.347 | 0.678  |
| -2.222 | -2.407 | -0.308 | -0.735 | 0.426  |
| 0.339  | -0.245 | 0.376  | 0.317  | 0.058  |
| -0.248 | -0.083 | -0.216 | -0.314 | 0.098  |
| 0.478  | 0.275  | 0.694  | 0.347  | 0.347  |
| -0.215 | -1.318 | 0.028  | -0.383 | 0.411  |
| 1.754  | 1.581  | -0.835 | -0.590 | -0.245 |
| 1.228  | 0.852  | 0.428  | 0.093  | 0.335  |
| -1.636 | -1.227 | -0.079 | -0.579 | 0.500  |
| -0.578 | -0.472 | 0.013  | -0.051 | 0.064  |
| 1.008  | 0.453  | 0.363  | 0.191  | 0.172  |
| 0.739  | 0.728  | -0.056 | -0.282 | 0.225  |
| -0.355 | -0.470 | 0.019  | -0.059 | 0.078  |
| 0.667  | 0.043  | -0.462 | 0.387  | -0.849 |
| -0.064 | 0.236  | 0.214  | 0.113  | 0.101  |
| 0.094  | -0.327 | -0.208 | -0.226 | 0.018  |
| -1.642 | -1.201 | -0.204 | -0.501 | 0.297  |
| -0.130 | -0.444 | -1.166 | -1.088 | -0.078 |
| 0.545  | -0.489 | -0.318 | 0.109  | -0.426 |
| 1.512  | 0.242  | -0.054 | 0.132  | -0.185 |
| -2.434 | -1.961 | 0.097  | -0.069 | 0.166  |
| 0.596  | 0.788  | 0.273  | 0.333  | -0.060 |
| -0.494 | -0.417 | -0.133 | -0.360 | 0.227  |
| 0.004  | -0.143 | 0.410  | -0.071 | 0.480  |
| 0.224  | -0.823 | -0.033 | 0.247  | -0.280 |
| 1.873  | 0.275  | 0.276  | 0.176  | 0.099  |
| -0.004 | -0.078 | -0.079 | 0.379  | -0.459 |
| 0.538  | 0.600  | -0.260 | -0.072 | -0.188 |
| 0.136  | -0.068 | 0.124  | -0.034 | 0.159  |
| 0.521  | -0.424 | -0.808 | 0.167  | -0.975 |
| 1.283  | -0.252 | 0.064  | 0.006  | 0.058  |
| -2.401 | -1.757 | 0.350  | 0.589  | -0.239 |
| 0.233  | 0.286  | 0.456  | 0.568  | -0.112 |
| -1.131 | -0.819 | 0.255  | -0.308 | 0.563  |
| -0.944 | -1.464 | 0.363  | -0.056 | 0.419  |

|        |        |        |        |        |
|--------|--------|--------|--------|--------|
| -0.627 | -1.118 | 0.234  | 0.908  | -0.674 |
| -1.947 | -1.699 | 0.062  | 1.100  | -1.038 |
| -0.405 | -0.658 | 0.629  | -0.534 | 1.163  |
| 0.564  | -0.325 | 0.401  | 0.283  | 0.118  |
| 0.079  | -0.946 | 0.126  | 0.499  | -0.373 |
| 1.210  | 0.824  | 0.481  | 0.068  | 0.414  |
| 1.814  | 2.062  | -1.186 | -0.841 | -0.345 |
| -0.217 | 0.101  | 0.301  | 0.335  | -0.033 |
| 1.306  | 1.297  | -0.893 | -0.286 | -0.608 |
| 0.687  | 1.001  | -0.301 | -0.566 | 0.265  |
| -1.503 | -1.323 | 0.417  | -0.327 | 0.744  |
| -1.289 | -1.948 | -0.356 | -0.415 | 0.059  |
| 1.432  | 0.668  | 0.052  | 0.283  | -0.231 |
| -1.032 | -0.491 | 0.398  | -0.421 | 0.820  |
| -0.194 | -0.039 | 0.464  | -0.029 | 0.493  |
| -1.612 | -1.015 | 0.211  | -0.286 | 0.497  |
| -4.342 | -1.868 | -0.225 | 0.892  | -1.117 |
| -0.701 | -0.235 | 0.102  | -0.600 | 0.701  |
| 0.658  | 0.825  | 0.132  | 0.268  | -0.136 |
| -2.406 | -2.551 | 0.295  | 0.275  | 0.021  |
| -0.631 | -1.460 | -0.018 | 0.734  | -0.752 |
| -2.800 | -2.499 | 0.028  | -0.914 | 0.942  |
| -2.339 | -2.005 | 0.100  | -0.676 | 0.777  |
| 0.373  | 0.149  | -0.189 | -0.279 | 0.089  |
| -2.600 | -1.951 | -0.192 | -1.071 | 0.879  |
| -1.696 | -1.172 | -0.098 | -0.675 | 0.577  |
| 0.462  | -0.425 | -0.259 | -0.448 | 0.189  |
| 0.880  | 0.280  | -0.415 | -0.291 | -0.124 |
| -0.807 | -1.441 | -1.085 | -0.794 | -0.291 |
| -0.962 | -0.675 | 0.199  | -0.362 | 0.561  |
| 0.381  | -0.463 | 0.199  | 0.203  | -0.004 |
| -0.519 | -0.452 | -0.130 | -0.155 | 0.025  |
| -0.961 | -1.283 | -0.325 | -1.139 | 0.813  |
| -0.278 | -0.467 | -0.116 | 0.258  | -0.374 |
| 1.315  | 0.113  | 0.537  | 0.631  | -0.094 |
| 2.817  | 4.055  | 0.320  | -0.380 | 0.701  |
| 1.769  | 1.446  | -2.026 | -0.606 | -1.420 |
| 3.644  | 2.259  | -0.763 | -0.010 | -0.753 |
| -0.721 | 0.336  | 0.161  | 0.210  | -0.049 |
| -2.600 | -2.611 | -0.320 | 0.685  | -1.004 |
| 0.559  | 1.249  | 0.021  | -0.071 | 0.092  |
| 1.222  | 1.504  | 0.135  | 0.018  | 0.117  |
| -1.197 | -1.404 | -0.179 | 0.381  | -0.561 |
| -1.422 | -1.139 | -0.119 | 0.776  | -0.895 |
| 0.349  | 0.306  | -0.065 | 0.236  | -0.301 |
| 0.138  | 0.671  | -0.181 | 0.134  | -0.315 |
| 2.399  | 1.780  | 0.261  | 0.270  | -0.009 |
| 0.620  | 0.022  | -0.362 | 0.044  | -0.406 |
| 1.160  | 1.838  | -0.116 | -0.811 | 0.695  |
| 2.595  | 2.159  | -0.160 | -0.196 | 0.036  |
| 2.585  | 1.897  | 0.373  | 0.512  | -0.139 |

|        |        |        |        |        |
|--------|--------|--------|--------|--------|
| 2.998  | 1.338  | -0.763 | -0.203 | -0.560 |
| 2.092  | 1.499  | 0.826  | 0.282  | 0.545  |
| 2.196  | 1.281  | 0.475  | 0.072  | 0.403  |
| 1.557  | 0.242  | 0.471  | 0.821  | -0.349 |
| -1.276 | -0.443 | 0.376  | -0.270 | 0.646  |
| 3.007  | 2.453  | -0.153 | -0.098 | -0.055 |
| 2.289  | 1.638  | -0.412 | 0.125  | -0.537 |
| 3.407  | 2.171  | 0.113  | -0.097 | 0.210  |
| 3.731  | 1.929  | 0.479  | 0.193  | 0.286  |
| 1.553  | 1.902  | 0.585  | -0.804 | 1.389  |
| 1.681  | 0.561  | -0.310 | 0.432  | -0.742 |
| 2.892  | 2.054  | 0.334  | -0.043 | 0.377  |
| 2.338  | 1.409  | 0.183  | 0.499  | -0.316 |
| 3.539  | 2.037  | 0.546  | 0.567  | -0.021 |
| 2.067  | 1.947  | 0.661  | 0.166  | 0.494  |
| 0.755  | 1.184  | -0.740 | -0.225 | -0.515 |
| 0.903  | 0.949  | 0.376  | 0.592  | -0.215 |
| 1.620  | 0.183  | 0.850  | 0.384  | 0.466  |
| 1.614  | 1.165  | 0.700  | 0.215  | 0.485  |
| 2.207  | 1.148  | 0.284  | 0.056  | 0.229  |
| 1.344  | 1.793  | 0.278  | -0.677 | 0.955  |
| 1.902  | 1.533  | 0.331  | -0.198 | 0.529  |
| 0.323  | 0.644  | 0.210  | -0.287 | 0.497  |
| -0.346 | -0.110 | 0.453  | -0.272 | 0.726  |
| 2.189  | 2.302  | 0.180  | -0.289 | 0.469  |
| 2.446  | 2.308  | 0.448  | 0.201  | 0.248  |
| 2.972  | 1.707  | 0.390  | 0.195  | 0.195  |
| 0.125  | 0.783  | -0.139 | -0.804 | 0.665  |
| 1.214  | 1.564  | 0.360  | -0.212 | 0.572  |
| 1.146  | 0.640  | 0.378  | -0.159 | 0.536  |
| -2.305 | -2.291 | -0.104 | -0.189 | 0.085  |
| 1.717  | 1.432  | 0.238  | 0.323  | -0.085 |
| -0.764 | -1.904 | 0.358  | 0.085  | 0.272  |
| 1.752  | 1.621  | -0.148 | -0.113 | -0.034 |
| 0.908  | 0.219  | -0.045 | 0.701  | -0.746 |
| 0.566  | 0.376  | -0.642 | -0.862 | 0.220  |
| -1.128 | 0.061  | 0.041  | 0.847  | -0.806 |
| -0.771 | -1.537 | 0.359  | 0.534  | -0.175 |
| -2.684 | -2.662 | 0.203  | 0.387  | -0.184 |
| -1.133 | 0.179  | 0.074  | -0.195 | 0.270  |
| -0.205 | 0.508  | -0.056 | -0.007 | -0.049 |
| 1.590  | 1.942  | 0.265  | -1.265 | 1.530  |
| -0.355 | -0.057 | -0.234 | -0.162 | -0.072 |
| -0.700 | -0.098 | 0.158  | 0.124  | 0.034  |
| -2.213 | -1.810 | -0.152 | 0.061  | -0.213 |
| 1.489  | 0.682  | 0.343  | 0.204  | 0.139  |
| 0.959  | -0.181 | 0.045  | -0.401 | 0.447  |
| -0.465 | -0.361 | 0.022  | -0.287 | 0.309  |
| -1.706 | -1.189 | -0.061 | 0.079  | -0.140 |
| -1.031 | -1.368 | 0.588  | 0.773  | -0.185 |
| 0.306  | 0.077  | 0.220  | 0.170  | 0.050  |

|        |        |        |        |        |
|--------|--------|--------|--------|--------|
| 2.401  | 2.520  | -0.139 | -0.159 | 0.020  |
| -1.082 | -0.681 | 0.051  | -0.031 | 0.083  |
| 2.350  | 1.733  | -0.249 | -0.226 | -0.022 |
| 0.223  | -0.006 | -0.206 | -0.446 | 0.240  |
| 1.621  | 1.752  | 0.078  | -0.345 | 0.422  |
| -1.296 | -1.606 | -0.013 | -0.056 | 0.043  |
| 0.937  | 0.253  | 0.394  | 0.224  | 0.170  |
| 0.346  | -0.008 | -0.033 | 0.291  | -0.324 |
| 1.747  | 1.601  | 0.467  | -0.119 | 0.586  |
| -2.036 | -2.333 | -0.133 | -0.015 | -0.119 |
| -3.311 | -3.507 | -0.147 | 0.410  | -0.557 |
| 1.807  | 0.657  | 0.631  | 0.347  | 0.284  |
| -2.822 | -1.857 | -0.345 | -0.618 | 0.273  |
| -0.771 | -1.734 | 0.210  | 0.210  | 0.000  |
| 1.543  | 1.442  | -0.499 | -0.617 | 0.117  |
| -0.126 | 0.717  | -0.932 | -0.572 | -0.360 |
| 0.597  | -0.845 | 0.605  | 0.370  | 0.236  |
| -0.766 | -0.505 | -0.582 | -0.662 | 0.080  |
| -0.095 | -1.364 | 0.086  | -0.118 | 0.204  |
| -0.315 | -1.590 | -0.022 | 0.622  | -0.644 |
| 2.639  | 1.969  | -0.646 | -0.432 | -0.215 |
| -2.051 | -1.537 | -0.262 | -0.829 | 0.567  |
| 1.021  | 0.948  | 0.250  | -0.194 | 0.444  |
| -1.086 | -0.841 | 0.222  | -0.050 | 0.272  |
| 1.131  | 1.288  | -0.535 | 0.084  | -0.619 |
| -0.197 | -0.645 | 0.272  | 0.191  | 0.081  |
| 1.291  | 1.480  | -0.285 | -0.304 | 0.019  |
| -0.026 | 0.893  | -0.369 | -0.853 | 0.484  |
| -1.380 | -0.966 | 0.100  | 0.270  | -0.170 |
| 0.772  | 0.096  | -0.361 | 0.089  | -0.451 |
| 1.163  | 1.027  | 0.354  | -0.383 | 0.736  |
| 0.566  | 0.727  | 0.219  | -0.153 | 0.372  |
| -1.138 | -1.768 | -0.168 | -0.053 | -0.115 |
| -0.863 | -0.359 | 0.695  | 0.075  | 0.620  |
| -2.052 | -1.404 | 0.708  | -0.332 | 1.040  |
| -0.836 | 0.719  | -0.844 | -0.947 | 0.103  |
| 0.698  | 0.017  | 0.055  | 0.403  | -0.349 |
| -0.573 | -2.071 | 0.305  | 0.621  | -0.316 |
| 0.677  | 0.772  | 0.445  | 0.487  | -0.042 |
| 0.533  | 0.369  | 0.536  | 0.745  | -0.209 |
| 1.624  | 1.919  | 0.027  | 0.262  | -0.235 |
| 2.477  | 1.498  | 0.307  | 0.068  | 0.239  |
| 1.344  | 0.841  | 0.483  | 0.212  | 0.271  |
| 2.867  | 2.012  | 0.440  | -0.050 | 0.490  |
| 2.791  | 1.597  | 0.467  | 0.360  | 0.107  |
| 0.987  | 1.681  | -0.921 | -1.328 | 0.406  |
| 0.832  | 1.744  | 0.021  | -0.511 | 0.532  |
| 1.524  | 2.051  | -0.159 | -0.681 | 0.522  |
| 2.357  | 1.870  | 0.626  | 0.508  | 0.118  |
| 2.298  | 2.582  | 0.388  | -0.159 | 0.546  |
| 2.123  | 1.688  | 1.016  | 0.657  | 0.359  |

|        |        |        |        |        |
|--------|--------|--------|--------|--------|
| -2.479 | -2.015 | -0.488 | -1.150 | 0.662  |
| 0.377  | -0.318 | 0.519  | 0.975  | -0.455 |
| 3.276  | 1.873  | -0.270 | -0.404 | 0.134  |
| 1.514  | 1.449  | -0.002 | 0.314  | -0.316 |
| 0.907  | -0.143 | 0.168  | 0.618  | -0.450 |
| -0.212 | 0.408  | 0.156  | -0.415 | 0.571  |
| 2.173  | 1.504  | 0.150  | 0.031  | 0.119  |
| -1.071 | -0.842 | -1.038 | -0.904 | -0.134 |
| 1.174  | 1.058  | -0.153 | 0.324  | -0.477 |
| -1.091 | -0.611 | -0.129 | 0.031  | -0.160 |
| 1.412  | 0.760  | 0.231  | 0.291  | -0.059 |
| 0.228  | 0.869  | 0.453  | -0.091 | 0.545  |
| 1.659  | 0.828  | 0.422  | 0.551  | -0.129 |
| 1.786  | 1.936  | -0.414 | 0.269  | -0.684 |
| 1.577  | 1.930  | 0.170  | -0.248 | 0.418  |
| 2.205  | 1.899  | -0.008 | -0.416 | 0.408  |
| 2.645  | 1.974  | -0.037 | -0.034 | -0.003 |
| 1.911  | 1.599  | 0.768  | 0.432  | 0.336  |
| 1.534  | 1.368  | 0.366  | -0.262 | 0.627  |
| 2.315  | 1.991  | 0.157  | -0.387 | 0.545  |
| 2.005  | 1.692  | 0.890  | 0.162  | 0.728  |
| -2.577 | -1.850 | -0.162 | 0.101  | -0.263 |
| 0.625  | -0.355 | 0.365  | -0.038 | 0.404  |
| -3.066 | -2.262 | -0.229 | -0.590 | 0.361  |
| 1.059  | 1.665  | -0.894 | -0.617 | -0.277 |
| -1.673 | 0.164  | -0.213 | -0.323 | 0.111  |
| 0.092  | -0.648 | 0.092  | 0.242  | -0.150 |
| 1.778  | 0.702  | 0.397  | 0.077  | 0.320  |
| 1.893  | 0.806  | 0.218  | 0.423  | -0.205 |
| -0.211 | 0.028  | -0.267 | -0.419 | 0.152  |
| 1.463  | 0.610  | 0.566  | 0.897  | -0.331 |
| 0.941  | 0.676  | 0.649  | 0.320  | 0.329  |
| 1.544  | 0.512  | 0.658  | 0.448  | 0.210  |
| -1.064 | -1.252 | -0.105 | -1.128 | 1.022  |
| -1.249 | -1.574 | -0.586 | -0.175 | -0.411 |
| -0.555 | 0.060  | 0.387  | -0.309 | 0.696  |
| 1.618  | 1.425  | 0.390  | 0.562  | -0.172 |
| 2.358  | 1.731  | 0.527  | 0.335  | 0.191  |
| 2.062  | 1.947  | 0.775  | -0.072 | 0.848  |
| 2.969  | 1.652  | -0.292 | 0.386  | -0.678 |
| 3.227  | 1.322  | 0.190  | -0.654 | 0.844  |
| 2.602  | 2.013  | 0.280  | 0.457  | -0.177 |
| 1.925  | 1.794  | -0.168 | 0.023  | -0.191 |
| 2.848  | 3.578  | 0.355  | 0.258  | 0.097  |
| 2.686  | 1.865  | 0.652  | 0.357  | 0.295  |
| 0.583  | 0.392  | 1.436  | 1.059  | 0.377  |
| 3.071  | 2.252  | 0.345  | 0.487  | -0.142 |
| 2.532  | 1.993  | 0.238  | 0.096  | 0.142  |
| 1.534  | 2.243  | 0.373  | 0.352  | 0.021  |
| -1.731 | -1.752 | 0.075  | 0.213  | -0.138 |
| 2.549  | 1.691  | 0.009  | 0.248  | -0.239 |
| 2.586  | 1.275  | -0.161 | 0.472  | -0.633 |

|        |        |        |        |        |
|--------|--------|--------|--------|--------|
| 2.068  | 1.919  | 0.774  | 0.330  | 0.444  |
| 2.057  | 1.454  | 0.488  | 0.671  | -0.183 |
| 3.154  | 2.089  | 0.179  | 0.392  | -0.213 |
| 1.968  | 2.130  | 0.295  | 0.150  | 0.145  |
| 2.657  | 1.970  | 0.224  | 0.368  | -0.144 |
| 2.135  | 2.159  | 0.116  | -0.612 | 0.728  |
| 2.919  | 1.864  | 0.714  | 0.267  | 0.447  |
| 2.447  | 1.728  | 0.266  | 0.198  | 0.069  |
| 3.171  | 1.716  | 0.328  | 0.283  | 0.044  |
| -0.600 | -0.693 | -0.066 | -0.139 | 0.073  |
| 1.847  | 1.328  | 0.960  | 0.309  | 0.651  |
| 1.196  | 0.935  | 0.644  | 0.313  | 0.331  |
| 0.660  | 0.733  | 0.320  | 0.397  | -0.078 |
| 1.684  | 1.875  | 0.421  | 0.342  | 0.079  |
| 1.764  | 1.299  | 0.365  | 0.570  | -0.206 |
| 2.607  | 2.098  | 0.463  | 0.193  | 0.270  |
| 1.096  | 1.047  | -0.226 | -0.239 | 0.013  |
| 2.298  | 1.698  | 0.315  | 0.203  | 0.113  |
| 2.650  | 2.224  | 0.237  | -0.579 | 0.816  |
| -0.536 | -0.133 | 0.612  | 0.066  | 0.547  |
| -0.173 | -0.352 | -0.171 | 0.630  | -0.801 |
| 0.995  | 1.155  | 0.486  | 0.177  | 0.309  |
| 0.504  | 2.024  | 0.485  | -0.491 | 0.976  |
| 2.165  | 1.404  | -0.237 | 0.318  | -0.555 |
| 2.392  | 1.599  | 0.693  | 0.321  | 0.373  |
| -0.916 | 0.044  | -0.067 | -0.621 | 0.554  |
| 1.302  | 0.810  | -0.341 | 0.382  | -0.723 |
| 0.544  | 0.417  | -0.155 | -0.129 | -0.026 |
| 2.024  | 1.123  | 0.375  | 0.538  | -0.163 |
| 1.346  | 1.136  | 0.453  | -0.326 | 0.779  |
| 1.056  | 1.288  | -0.116 | -0.522 | 0.406  |
| 1.140  | 0.300  | 0.419  | 0.038  | 0.381  |
| 2.277  | 1.935  | 0.482  | 0.000  | 0.482  |
| 3.064  | 2.694  | -0.034 | 0.479  | -0.513 |
| 1.288  | 0.558  | -0.123 | 0.142  | -0.265 |
| 2.055  | 1.351  | 0.402  | 0.675  | -0.273 |
| 1.341  | 1.290  | 0.348  | 0.293  | 0.055  |
| -1.122 | -1.077 | 0.138  | -0.123 | 0.261  |
| 2.407  | 1.790  | 0.562  | 0.218  | 0.344  |
| 1.358  | 0.742  | 0.172  | 0.326  | -0.154 |
| 2.195  | 2.137  | 0.284  | 0.073  | 0.211  |
| 2.903  | 2.660  | 0.465  | 0.094  | 0.371  |
| -0.032 | -0.451 | 0.529  | 0.851  | -0.323 |
| 1.734  | 1.337  | 0.367  | 0.624  | -0.257 |
| 1.506  | 0.913  | 0.550  | 0.467  | 0.083  |
| 2.014  | 1.915  | 0.257  | -0.146 | 0.403  |
| 1.606  | 1.614  | 0.245  | 0.079  | 0.166  |
| 0.934  | 1.362  | 0.066  | -0.226 | 0.292  |
| 0.812  | -0.024 | 0.276  | -0.530 | 0.805  |
| -0.259 | -0.609 | 0.668  | 0.636  | 0.032  |
| 2.891  | 1.288  | 0.079  | 0.177  | -0.098 |
| 0.453  | 1.001  | 0.480  | -0.043 | 0.523  |

|        |        |        |        |        |
|--------|--------|--------|--------|--------|
| 1.828  | 1.073  | 0.471  | 0.338  | 0.133  |
| 1.759  | 1.177  | 0.343  | 0.822  | -0.479 |
| 2.322  | 1.886  | 0.018  | 0.190  | -0.172 |
| 1.491  | 1.402  | -0.115 | 0.130  | -0.245 |
| 2.011  | 1.482  | -0.127 | 0.070  | -0.197 |
| 1.822  | 0.997  | 0.485  | 0.608  | -0.124 |
| 2.732  | 2.626  | 0.042  | 0.371  | -0.329 |
| 2.146  | 2.428  | -0.111 | 0.080  | -0.191 |
| 1.635  | 1.921  | 0.806  | 0.663  | 0.143  |
| 1.587  | 1.984  | -0.233 | -0.140 | -0.093 |
| 1.406  | 1.363  | 0.549  | 0.385  | 0.164  |
| 2.286  | 1.620  | 0.627  | 0.220  | 0.407  |
| 2.272  | 2.223  | 0.051  | 0.266  | -0.216 |
| -1.797 | -1.246 | 0.066  | 0.712  | -0.646 |
| 2.927  | 2.319  | 0.703  | -0.036 | 0.739  |
| -1.586 | -1.312 | -0.269 | -0.410 | 0.141  |
| 1.723  | 1.395  | -0.037 | 0.140  | -0.177 |
| -1.368 | -0.560 | -0.124 | 0.039  | -0.163 |
| 1.844  | 1.519  | 0.350  | 0.186  | 0.164  |
| 1.161  | 0.297  | 0.221  | 0.935  | -0.714 |
| 0.007  | 0.318  | -0.125 | -0.398 | 0.273  |
| 1.193  | 1.131  | 0.227  | -0.113 | 0.341  |
| 0.281  | -0.011 | -0.052 | 0.198  | -0.251 |
| 3.335  | 2.374  | 0.381  | 0.274  | 0.106  |
| 2.194  | 2.100  | 0.157  | -0.135 | 0.292  |
| 0.460  | -0.243 | 0.343  | 0.413  | -0.070 |
| 1.928  | 0.878  | 0.585  | 0.290  | 0.295  |
| -1.263 | 0.098  | 0.252  | -1.100 | 1.351  |
| -0.279 | 0.244  | -0.250 | -0.484 | 0.235  |
| 0.128  | -0.781 | -0.722 | -0.311 | -0.411 |
| 2.304  | 1.608  | -0.184 | -0.317 | 0.133  |
| 0.705  | 1.386  | 0.260  | 0.142  | 0.118  |
| -2.482 | -0.694 | 0.265  | -0.636 | 0.901  |
| 2.282  | 2.240  | 0.129  | -0.403 | 0.532  |
| 0.913  | 0.592  | 0.444  | 0.328  | 0.116  |
| 1.112  | 0.408  | 0.540  | 0.305  | 0.235  |
| 2.984  | 2.419  | -0.014 | 0.580  | -0.593 |
| 1.747  | 1.089  | 0.139  | 0.441  | -0.302 |
| 1.170  | 1.542  | -0.396 | -0.426 | 0.030  |
| 2.594  | 1.790  | 0.361  | 0.322  | 0.038  |
| 1.252  | 0.814  | 0.366  | 0.177  | 0.189  |
| -2.321 | -0.481 | -1.266 | -0.889 | -0.377 |
| 3.001  | 2.673  | -0.338 | -0.254 | -0.084 |
| 3.040  | 2.129  | 0.726  | 0.324  | 0.402  |
| 2.832  | 1.907  | 0.294  | -0.076 | 0.370  |
| -2.847 | -1.411 | 0.237  | -0.713 | 0.949  |
| 1.447  | 0.969  | 0.324  | 1.013  | -0.689 |
| 2.315  | 2.510  | 0.067  | -0.254 | 0.321  |
| 3.684  | 2.349  | 0.404  | 0.415  | -0.011 |
| 2.722  | 2.187  | 0.361  | 0.115  | 0.246  |
| -1.600 | -0.813 | 0.176  | -0.259 | 0.436  |
| 1.487  | 1.378  | 0.609  | 0.274  | 0.335  |



|        |        |        |        |        |
|--------|--------|--------|--------|--------|
| 0.434  | 1.125  | 0.583  | 0.147  | 0.436  |
| 1.799  | 0.844  | 1.094  | -0.289 | 1.383  |
| 2.467  | 1.656  | 0.467  | 0.334  | 0.134  |
| 3.069  | 1.337  | 0.515  | -0.068 | 0.583  |
| 2.905  | 1.233  | -0.222 | -1.319 | 1.097  |
| 2.491  | 2.347  | 0.434  | -0.048 | 0.482  |
| 1.591  | 2.005  | 0.746  | 0.156  | 0.589  |
| 0.319  | 0.371  | 0.430  | 0.903  | -0.473 |
| 2.130  | 0.920  | 0.331  | 0.325  | 0.006  |
| 1.209  | 0.953  | -0.087 | -0.159 | 0.073  |
| 2.077  | 2.349  | 0.472  | -0.433 | 0.906  |
| 2.018  | 1.792  | 0.243  | 0.046  | 0.197  |
| 0.792  | 0.981  | 0.130  | 0.008  | 0.122  |
| 1.807  | 1.999  | -0.355 | -0.911 | 0.556  |
| 2.122  | 1.303  | -0.017 | 0.258  | -0.275 |
| 1.578  | 0.974  | 0.610  | 0.877  | -0.266 |
| -1.411 | -0.884 | -0.335 | -0.388 | 0.053  |
| -1.297 | -1.589 | 0.031  | 0.299  | -0.268 |
| -0.880 | 0.006  | -0.493 | -0.124 | -0.369 |
| 1.330  | 1.852  | 0.360  | -0.468 | 0.828  |
| 2.029  | 1.434  | 0.306  | -0.365 | 0.671  |
| 2.828  | 1.993  | 0.505  | -0.034 | 0.539  |
| -0.434 | 0.947  | 0.318  | -0.679 | 0.996  |
| 2.374  | 2.508  | -0.140 | -0.368 | 0.228  |
| 1.512  | 1.026  | 0.365  | 0.395  | -0.030 |
| 2.235  | 2.003  | 0.072  | 0.090  | -0.018 |
| 2.253  | 1.666  | 0.200  | -0.268 | 0.469  |
| 2.518  | 2.053  | -0.164 | 0.056  | -0.220 |
| 2.258  | 1.631  | 0.053  | 0.209  | -0.156 |
| 2.568  | 1.839  | -0.352 | -0.296 | -0.056 |
| 0.057  | -0.205 | -0.215 | 0.637  | -0.853 |
| 2.199  | 1.746  | -0.118 | 0.059  | -0.177 |
| 1.629  | 1.019  | 0.656  | -0.179 | 0.835  |
| 2.705  | 2.223  | 0.632  | 0.049  | 0.583  |
| 2.600  | 1.819  | 0.726  | 0.779  | -0.053 |
| 1.900  | 1.243  | 0.225  | 0.479  | -0.254 |
| 1.373  | 0.820  | 0.490  | 0.302  | 0.188  |
| 2.384  | 1.655  | 0.078  | 0.096  | -0.018 |
| 3.120  | 2.674  | 0.153  | 0.209  | -0.055 |
| 2.253  | 2.622  | 0.022  | -0.418 | 0.440  |
| 0.762  | 0.926  | 0.573  | -0.300 | 0.873  |
| 0.378  | 1.550  | -0.576 | -1.008 | 0.433  |
| -2.024 | 0.091  | -0.078 | -0.883 | 0.805  |
| 1.794  | 1.872  | -0.144 | -0.674 | 0.530  |
| 2.204  | 2.595  | 0.937  | 0.173  | 0.764  |
| 2.439  | 1.663  | 0.095  | 0.201  | -0.106 |
| 0.035  | 0.453  | 0.410  | 0.335  | 0.075  |
| 1.217  | 1.895  | -0.023 | 0.165  | -0.188 |
| -0.270 | 0.705  | 0.308  | -0.738 | 1.046  |
| -0.503 | -0.137 | 0.099  | -0.507 | 0.606  |
| 0.589  | 0.585  | 0.219  | 0.505  | -0.286 |
| 0.402  | 1.099  | 0.123  | 0.473  | -0.350 |

|        |        |        |        |        |
|--------|--------|--------|--------|--------|
| 1.817  | 1.375  | 0.551  | 0.738  | -0.187 |
| 1.447  | 1.000  | -0.201 | -0.215 | 0.014  |
| 2.971  | 1.717  | 0.169  | 0.107  | 0.062  |
| 2.803  | 2.154  | 0.085  | 0.215  | -0.130 |
| 1.904  | 1.321  | 0.232  | 0.416  | -0.185 |
| 0.952  | 1.095  | 0.171  | 0.044  | 0.127  |
| 2.782  | 2.233  | -0.033 | -0.017 | -0.016 |
| 3.735  | 2.795  | 0.678  | -0.047 | 0.725  |
| 1.321  | 1.707  | 0.179  | 0.755  | -0.575 |
| 1.330  | 0.681  | 0.510  | 1.001  | -0.491 |
| 2.162  | 1.541  | 0.260  | -0.150 | 0.410  |
| 1.677  | 1.117  | 0.682  | 0.342  | 0.340  |
| 1.525  | 0.583  | -0.090 | 0.251  | -0.341 |
| 2.220  | 2.863  | 0.219  | 0.075  | 0.143  |
| 1.464  | 0.602  | -0.272 | -0.376 | 0.104  |
| 0.236  | -0.164 | -0.264 | 0.180  | -0.443 |
| 0.290  | 0.515  | -0.356 | 0.176  | -0.532 |
| 1.038  | 1.528  | 0.146  | -0.172 | 0.318  |
| 2.214  | 1.901  | -0.040 | -0.105 | 0.065  |
| 2.724  | 1.617  | 0.340  | 0.305  | 0.035  |
| 1.844  | 2.146  | -0.135 | -0.222 | 0.087  |
| 1.110  | 1.224  | 0.398  | 0.160  | 0.238  |
| 1.903  | 1.183  | 0.738  | 0.822  | -0.084 |
| 1.015  | 0.628  | 0.310  | 0.009  | 0.301  |
| 1.956  | 2.278  | 0.038  | 0.050  | -0.013 |
| 0.834  | 0.811  | 0.159  | -1.089 | 1.248  |
| 2.288  | 1.695  | 0.777  | 0.242  | 0.536  |
| 2.158  | 2.344  | -0.227 | -0.104 | -0.123 |
| -1.062 | -0.354 | 0.167  | -0.422 | 0.590  |
| 2.201  | 2.241  | 0.396  | 0.060  | 0.336  |
| 2.609  | 2.045  | 0.531  | 0.518  | 0.013  |
| 1.531  | 3.507  | -0.438 | -1.746 | 1.307  |
| -0.358 | -0.026 | -0.017 | 0.222  | -0.239 |
| 1.284  | 1.623  | -0.812 | -0.497 | -0.315 |
| 0.289  | 0.659  | -0.087 | -0.366 | 0.279  |
| 0.509  | 0.285  | 0.536  | 0.960  | -0.424 |
| 1.214  | 2.091  | 0.042  | -0.043 | 0.085  |
| 0.669  | 0.727  | 0.070  | 0.096  | -0.026 |
| 1.846  | 2.031  | 0.395  | -0.043 | 0.438  |
| 1.255  | 1.615  | -0.044 | -0.155 | 0.111  |
| 1.804  | 1.144  | 0.254  | -0.296 | 0.550  |
| 1.278  | 1.077  | -0.225 | -0.062 | -0.164 |
| -0.736 | -0.331 | 0.448  | 0.131  | 0.317  |
| 1.041  | 0.617  | -0.333 | 0.537  | -0.870 |
| 2.077  | 1.951  | 0.546  | -0.393 | 0.939  |
| 1.436  | 1.137  | 0.212  | 0.162  | 0.050  |
| 0.781  | 1.944  | 0.108  | -0.500 | 0.608  |
| 2.191  | 2.066  | 0.465  | -0.099 | 0.564  |
| 1.813  | 0.355  | 0.093  | 0.549  | -0.456 |
| -0.407 | -0.057 | 1.053  | -0.843 | 1.896  |
| 2.432  | 1.262  | 0.671  | 0.574  | 0.098  |
| 0.266  | 1.059  | 0.157  | -0.003 | 0.160  |

|        |        |        |        |        |
|--------|--------|--------|--------|--------|
| 2.745  | 2.215  | 0.778  | -0.046 | 0.823  |
| 1.963  | 1.020  | 0.237  | 0.461  | -0.224 |
| 0.421  | 1.125  | 0.168  | -0.296 | 0.464  |
| 2.052  | 2.244  | 0.200  | -0.048 | 0.248  |
| -0.304 | 0.362  | -0.005 | -0.611 | 0.606  |
| 0.768  | 0.745  | 0.113  | -0.743 | 0.855  |
| 2.548  | 2.278  | 0.128  | -0.110 | 0.238  |
| 2.031  | 1.374  | 0.336  | 0.398  | -0.063 |
| 2.722  | 2.193  | -0.146 | -0.333 | 0.187  |
| 2.630  | 1.695  | 0.512  | 0.026  | 0.487  |
| 2.114  | 1.166  | 0.531  | 0.009  | 0.521  |
| 1.189  | 1.693  | 0.892  | 0.036  | 0.856  |
| 2.922  | 2.168  | 0.508  | 0.048  | 0.460  |
| 2.048  | 1.353  | 0.876  | 0.644  | 0.232  |
| 0.545  | 0.996  | 0.140  | -0.405 | 0.545  |
| 3.110  | 2.432  | -0.993 | -0.692 | -0.301 |
| 1.479  | 1.419  | 0.190  | 0.012  | 0.178  |
| 0.693  | 0.273  | 0.415  | 0.144  | 0.271  |
| 1.846  | 1.436  | 0.096  | 0.436  | -0.340 |
| 1.253  | 2.317  | 0.560  | -0.873 | 1.433  |
| -0.393 | -0.361 | 0.693  | 1.186  | -0.494 |
| 2.094  | 1.890  | 0.142  | 0.087  | 0.055  |
| -3.593 | -3.334 | -0.034 | -0.733 | 0.700  |
| -1.618 | -1.307 | 0.141  | -0.851 | 0.993  |
| 1.487  | 1.967  | 0.430  | -0.419 | 0.849  |
| -1.094 | -1.038 | -0.013 | 0.067  | -0.081 |
| -1.697 | -1.506 | -0.275 | 0.380  | -0.655 |
| -2.289 | -1.992 | -0.162 | -0.565 | 0.403  |
| -0.248 | 0.161  | 0.404  | -0.664 | 1.068  |
| 1.288  | 0.650  | 0.005  | -0.520 | 0.525  |
| 2.145  | 1.951  | 0.295  | 0.014  | 0.281  |
| -0.892 | -0.764 | 0.723  | -0.473 | 1.196  |
| 2.946  | 2.324  | 0.508  | 0.211  | 0.297  |
| -2.116 | -3.334 | 0.132  | 0.638  | -0.506 |
| 0.829  | 0.082  | 0.140  | 0.285  | -0.145 |
| -2.198 | 0.056  | 0.632  | 0.797  | -0.165 |
| 2.168  | 1.553  | 0.934  | 0.094  | 0.840  |
| 0.313  | 1.178  | 0.297  | 0.331  | -0.034 |
| 0.871  | 1.195  | 0.708  | -0.141 | 0.848  |
| 1.412  | 1.098  | 0.252  | 0.315  | -0.062 |
| 2.031  | 1.578  | 0.398  | -0.130 | 0.528  |
| 1.446  | 1.492  | 0.632  | 0.326  | 0.306  |
| 2.157  | 2.119  | 0.178  | -0.277 | 0.455  |
| 3.025  | 2.742  | 0.471  | 0.123  | 0.348  |
| 1.180  | 1.403  | 0.207  | -0.411 | 0.618  |
| 2.416  | 1.616  | -0.101 | -0.197 | 0.096  |
| -2.175 | -1.707 | 0.430  | -0.363 | 0.794  |
| 0.036  | -0.286 | 0.274  | 0.199  | 0.075  |
| 0.471  | -0.339 | 0.017  | 0.229  | -0.212 |
| -0.582 | -1.758 | 0.291  | 0.139  | 0.152  |
| 0.262  | 0.441  | 0.361  | 0.254  | 0.107  |
| 1.278  | 1.153  | 0.206  | 0.031  | 0.175  |

|        |        |        |        |        |
|--------|--------|--------|--------|--------|
| 2.160  | 1.510  | 0.376  | 0.042  | 0.334  |
| 1.912  | 0.760  | 0.069  | -0.027 | 0.096  |
| -3.666 | -1.672 | -0.409 | -0.697 | 0.289  |
| 0.734  | 0.636  | 0.180  | 0.289  | -0.109 |
| 2.365  | 0.855  | -0.070 | -0.002 | -0.067 |

| mRNA lifetime<br>/ change fold-<br>$\log_2(\text{siYTHDF2}/\text{siControl})$ |
|-------------------------------------------------------------------------------|
| mRNA lifetime<br>( <b>Source Data</b><br><b>to Figure 2c-</b><br><b>d)</b>    |
| 1.199                                                                         |
| 2.708                                                                         |
| 0.417                                                                         |
| -0.540                                                                        |
| 0.054                                                                         |
| -1.229                                                                        |
| 0.165                                                                         |
| #NUM!                                                                         |
| 0.701                                                                         |
| 1.058                                                                         |
| -0.036                                                                        |
| -0.163                                                                        |
| 0.210                                                                         |
| -0.328                                                                        |
| #NUM!                                                                         |
| #NUM!                                                                         |
| 0.135                                                                         |
| #NUM!                                                                         |
| -0.782                                                                        |
| 0.329                                                                         |
| -0.683                                                                        |
| #NUM!                                                                         |
| 0.615                                                                         |
| 0.571                                                                         |
| 0.459                                                                         |
| #NUM!                                                                         |
| -0.148                                                                        |
| -0.266                                                                        |
| 1.158                                                                         |
| -0.557                                                                        |
| 0.420                                                                         |
| -0.591                                                                        |
| 0.533                                                                         |
| 0.216                                                                         |
| 0.549                                                                         |
| -0.936                                                                        |
| -0.576                                                                        |
| -0.027                                                                        |
| -2.323                                                                        |
| 0.512                                                                         |

|        |
|--------|
| #NUM!  |
| 0.403  |
| 1.881  |
| -0.183 |
| #NUM!  |
| -0.498 |
| -0.006 |
| 0.080  |
| #NUM!  |
| -0.301 |
| -0.208 |
| 0.276  |
| 0.425  |
| -0.267 |
| -0.108 |
| #NUM!  |
| -1.133 |
| 0.087  |
| 0.272  |
| -0.265 |
| -0.770 |
| 0.188  |
| 0.635  |
| 0.402  |
| -0.502 |
| -1.560 |
| #NUM!  |
| -0.594 |
| -0.946 |
| 0.390  |
| -0.045 |
| #NUM!  |
| #NUM!  |
| -1.043 |
| 0.317  |
| #NUM!  |
| 0.065  |
| 0.292  |
| 0.239  |
| 0.416  |
| -0.985 |
| -0.066 |
| -0.322 |
| 0.727  |
| -0.201 |
| 1.405  |
| -0.078 |
| 1.235  |
| #NUM!  |
| 0.947  |
| -0.353 |

|        |
|--------|
| 0.022  |
| 0.994  |
| -1.344 |
| 0.785  |
| 0.334  |
| -0.310 |
| 0.419  |
| 1.008  |
| -0.433 |
| -0.061 |
| -0.678 |
| -1.636 |
| #NUM!  |
| 0.884  |
| 2.366  |
| -1.544 |
| #NUM!  |
| 0.955  |
| 1.363  |
| -0.682 |
| 0.216  |
| #NUM!  |
| -0.611 |
| -0.431 |
| 0.190  |
| 0.766  |
| -0.652 |
| 0.149  |
| 0.369  |
| 0.511  |
| 0.308  |
| 0.190  |
| -0.502 |
| 1.154  |
| -1.263 |
| -0.286 |
| #NUM!  |
| -0.052 |
| -0.908 |
| -1.696 |
| 0.219  |
| 0.547  |
| 0.147  |
| 0.598  |
| -0.022 |
| 0.257  |
| 1.454  |
| 0.318  |
| 0.175  |
| 1.475  |
| 0.284  |

|        |
|--------|
| -0.817 |
| 1.051  |
| 0.167  |
| -0.109 |
| 0.442  |
| -0.939 |
| -0.874 |
| #NUM!  |
| 1.583  |
| 0.074  |
| -3.986 |
| 0.319  |
| 0.273  |
| 0.455  |
| 0.329  |
| -0.282 |
| 1.571  |
| 0.314  |
| 0.727  |
| -0.282 |
| 1.103  |
| 0.399  |
| 1.684  |
| -0.119 |
| #NUM!  |
| -0.082 |
| 0.399  |
| #NUM!  |
| 0.347  |
| #NUM!  |
| 0.236  |
| 0.332  |
| 0.521  |
| 0.527  |
| -0.974 |
| 0.242  |
| -1.532 |
| 0.568  |
| 0.855  |
| 0.648  |
| -0.184 |
| -0.006 |
| -0.235 |
| -0.633 |
| -0.458 |
| #NUM!  |
| 1.945  |
| 0.706  |
| 0.574  |
| -0.068 |
| 0.454  |



|        |
|--------|
| -0.007 |
| #NUM!  |
| -0.710 |
| #NUM!  |
| -0.182 |
| #NUM!  |
| 0.156  |
| 0.167  |
| #NUM!  |
| -1.457 |
| -1.771 |
| 0.213  |
| -0.578 |
| 0.269  |
| 0.052  |
| 0.309  |
| 0.103  |
| -0.163 |
| -2.038 |
| 0.582  |
| -0.899 |
| 0.324  |
| -1.530 |
| -1.557 |
| 0.190  |
| -0.431 |
| 0.246  |
| 1.229  |
| -0.246 |
| -0.790 |
| 0.345  |
| 0.183  |
| -0.141 |
| 0.055  |
| 0.432  |
| -0.261 |
| 0.350  |
| 0.680  |
| -0.180 |
| 0.508  |
| 0.066  |
| 0.450  |
| 0.517  |
| 2.189  |
| 0.373  |
| #NUM!  |
| 0.631  |
| 1.670  |
| -0.024 |
| 0.224  |
| -0.365 |

|        |
|--------|
| 0.052  |
| #NUM!  |
| -0.283 |
| 0.409  |
| 0.820  |
| -0.764 |
| 4.657  |
| 1.317  |
| -0.778 |
| #NUM!  |
| #NUM!  |
| -0.686 |
| #NUM!  |
| -1.403 |
| 0.100  |
| 0.339  |
| 0.238  |
| 0.774  |
| 0.024  |
| 0.294  |
| 0.363  |
| -0.147 |
| -0.058 |
| 0.252  |
| -0.668 |
| -0.103 |
| 0.016  |
| 0.217  |
| 0.409  |
| 0.538  |
| 0.550  |
| #NUM!  |
| #NUM!  |
| 0.100  |
| 0.409  |
| 1.201  |
| 0.266  |
| 1.002  |
| 0.114  |
| 2.611  |
| 0.462  |
| 0.208  |
| 0.488  |
| -2.329 |
| -0.112 |
| 0.750  |
| -0.626 |
| 0.609  |
| -2.052 |
| 0.260  |
| 0.269  |

|        |
|--------|
| -1.228 |
| -1.022 |
| #NUM!  |
| 0.195  |
| -0.125 |
| -1.798 |
| #NUM!  |
| -0.095 |
| #NUM!  |
| #NUM!  |
| -0.985 |
| -0.156 |
| -0.485 |
| 0.632  |
| 0.095  |
| -0.051 |
| -0.375 |
| -0.162 |
| 0.301  |
| -0.171 |
| 0.142  |
| 0.434  |
| 0.179  |
| -0.344 |
| #NUM!  |
| -0.178 |
| #NUM!  |
| 0.099  |
| 0.098  |
| 0.152  |
| -0.262 |
| 0.048  |
| -0.203 |
| -1.503 |
| 0.198  |
| 0.717  |
| 0.486  |
| 3.266  |
| 0.101  |
| -0.012 |
| 0.310  |
| 0.381  |
| 0.400  |
| 0.247  |
| 0.892  |
| #NUM!  |
| 0.210  |
| 1.099  |
| 0.626  |
| 0.173  |
| -0.660 |

|        |
|--------|
| -1.639 |
| 0.451  |
| -0.333 |
| -0.737 |
| -0.485 |
| -0.124 |
| -0.047 |
| 0.017  |
| -0.377 |
| #NUM!  |
| 0.673  |
| #NUM!  |
| #NUM!  |
| -0.364 |
| #NUM!  |
| #NUM!  |
| -0.943 |
| -1.056 |
| #NUM!  |
| 0.075  |
| -0.590 |
| #NUM!  |
| 0.823  |
| -0.847 |
| -0.105 |
| #NUM!  |
| 1.706  |
| -0.625 |
| -1.589 |
| 2.913  |
| -1.029 |
| 0.541  |
| -0.744 |
| -0.324 |
| -0.794 |
| 0.199  |
| -0.058 |
| 0.677  |
| 0.619  |
| -0.003 |
| 0.325  |
| #NUM!  |
| 0.264  |
| #NUM!  |
| 0.071  |
| -0.939 |
| 0.138  |
| #NUM!  |
| 0.490  |
| 0.161  |
| 0.643  |

|        |
|--------|
| -0.504 |
| -0.196 |
| #NUM!  |
| -0.959 |
| #NUM!  |
| 1.339  |
| 0.264  |
| -0.237 |
| -0.244 |
| 0.841  |
| -0.505 |
| 0.026  |
| -0.137 |
| -0.439 |
| #NUM!  |
| -0.150 |
| 0.086  |
| -0.824 |
| 0.524  |
| #NUM!  |
| 0.480  |
| -0.044 |
| 0.544  |
| 0.212  |
| -1.070 |
| #NUM!  |
| 0.326  |
| 0.998  |
| 0.522  |
| -0.295 |
| 0.066  |
| 0.060  |
| -0.077 |
| 0.299  |
| #NUM!  |
| -0.457 |
| 0.072  |
| #NUM!  |
| 0.242  |
| 0.373  |
| 1.014  |
| 0.259  |
| 0.212  |
| -0.637 |
| 0.170  |
| 0.458  |
| 0.538  |
| 0.690  |
| 0.215  |
| 0.272  |
| 0.540  |

|        |
|--------|
| 0.135  |
| 1.951  |
| 0.322  |
| 0.523  |
| #NUM!  |
| -0.432 |
| 0.845  |
| 0.421  |
| -0.216 |
| 1.414  |
| 0.750  |
| 0.447  |
| 0.308  |
| 0.161  |
| 0.629  |
| 0.030  |
| -0.544 |
| 0.096  |
| 0.332  |
| -0.009 |
| 0.421  |
| 0.548  |
| 0.179  |
| 0.186  |
| 0.282  |
| -0.023 |
| 0.385  |
| -0.126 |
| -0.054 |
| -0.925 |
| -0.188 |
| -0.325 |
| #NUM!  |
| #NUM!  |
| 0.291  |
| #NUM!  |
| 0.247  |
| -0.145 |
| 0.080  |
| -0.442 |
| -0.487 |
| #NUM!  |
| -0.493 |
| -0.257 |
| 0.311  |
| -0.587 |
| 0.100  |
| 0.338  |
| 1.098  |
| 0.860  |
| 0.719  |

|        |
|--------|
| 0.402  |
| -0.122 |
| -0.181 |
| -0.957 |
| 0.255  |
| -0.183 |
| -0.216 |
| -0.219 |
| -0.665 |
| 0.059  |
| #NUM!  |
| #NUM!  |
| -0.693 |
| 0.904  |
| -0.661 |
| 0.065  |
| #NUM!  |
| #NUM!  |
| 0.364  |
| 0.042  |
| #NUM!  |
| 0.767  |
| -0.139 |
| 0.022  |
| #NUM!  |
| #NUM!  |
| 0.059  |
| 0.019  |
| 0.121  |
| 0.427  |
| 0.584  |
| 0.610  |
| 0.518  |
| 0.386  |
| -2.407 |
| 0.087  |
| 1.433  |
| -0.681 |
| 0.018  |
| 0.017  |
| 0.322  |
| -0.315 |
| 0.323  |
| -1.264 |
| #NUM!  |
| 1.892  |
| 1.156  |
| 0.153  |
| -1.673 |
| #NUM!  |
| 0.190  |

|        |
|--------|
| #NUM!  |
| #NUM!  |
| 0.234  |
| -0.141 |
| 0.303  |
| 0.324  |
| -0.071 |
| -0.483 |
| 0.214  |
| #NUM!  |
| #NUM!  |
| 0.073  |
| -0.767 |
| 0.273  |
| 0.014  |
| 0.530  |
| 0.207  |
| 0.862  |
| -0.296 |
| #NUM!  |
| -0.218 |
| 0.203  |
| -0.293 |
| -1.058 |
| 0.975  |
| 0.043  |
| 0.087  |
| 0.178  |
| 0.166  |
| -0.165 |
| -0.414 |
| #NUM!  |
| 0.170  |
| 0.748  |
| 0.407  |
| 0.168  |
| 0.841  |
| -0.422 |
| -0.050 |
| 0.338  |
| -0.188 |
| 0.314  |
| #NUM!  |
| #NUM!  |
| -0.652 |
| 0.428  |
| -0.977 |
| -0.653 |
| -0.834 |
| #NUM!  |
| 0.072  |



|        |
|--------|
| -1.071 |
| 0.000  |
| -0.295 |
| -0.516 |
| -0.661 |
| 0.563  |
| -0.485 |
| -0.128 |
| -0.525 |
| -0.201 |
| #NUM!  |
| #NUM!  |
| #NUM!  |
| #NUM!  |
| -2.312 |
| #NUM!  |
| -1.864 |
| -0.438 |
| #NUM!  |
| #NUM!  |
| #NUM!  |
| -0.650 |
| #NUM!  |
| 0.210  |
| 0.959  |
| #NUM!  |
| #NUM!  |
| 4.925  |
| -0.404 |
| #NUM!  |
| #NUM!  |
| 0.132  |
| -0.384 |
| #NUM!  |
| -0.599 |
| 0.222  |
| -0.760 |
| -2.067 |
| -0.689 |
| #NUM!  |
| -0.049 |
| -0.566 |
| -0.732 |
| -0.310 |
| 0.381  |
| 0.070  |
| -0.063 |
| -0.324 |
| -0.450 |
| #NUM!  |
| -0.052 |

|        |
|--------|
| #NUM!  |
| -0.197 |
| 0.402  |
| -0.141 |
| -0.159 |
| 0.344  |
| -0.552 |
| 0.612  |
| 0.089  |
| #NUM!  |
| -0.313 |
| 0.489  |
| 0.042  |
| 0.194  |
| 0.413  |
| 0.581  |
| -0.166 |
| 0.481  |
| 0.214  |
| #NUM!  |
| 0.510  |
| 0.864  |
| 0.327  |
| 0.674  |
| 0.567  |
| 0.271  |
| -0.872 |
| -0.626 |
| -0.377 |
| -0.347 |
| #NUM!  |
| -0.290 |
| 0.530  |
| 0.356  |
| 0.128  |
| 0.541  |
| -0.013 |
| 0.758  |
| 0.351  |
| #NUM!  |
| -0.389 |
| 1.001  |
| 0.543  |
| -0.198 |
| 0.278  |
| #NUM!  |
| #NUM!  |
| 0.487  |
| #NUM!  |
| -0.228 |
| 0.083  |

|        |
|--------|
| 0.274  |
| #NUM!  |
| 0.311  |
| 0.296  |
| 0.372  |
| 0.325  |
| 0.424  |
| #NUM!  |
| 2.321  |
| 0.375  |
| #NUM!  |
| 0.376  |
| 0.243  |
| 0.315  |
| 0.631  |
| 1.247  |
| 0.479  |
| 0.208  |
| 0.018  |
| 0.507  |
| #NUM!  |
| 1.480  |
| -0.097 |
| 0.212  |
| 0.162  |
| 0.168  |
| 0.129  |
| 4.451  |
| 0.164  |
| -0.611 |
| -0.390 |
| -1.529 |
| -0.849 |
| -0.075 |
| #NUM!  |
| -0.875 |
| #NUM!  |
| 0.719  |
| 0.500  |
| -0.061 |
| -0.400 |
| #NUM!  |
| -0.260 |
| #NUM!  |
| -0.574 |
| #NUM!  |
| #NUM!  |
| #NUM!  |
| 0.124  |
| 0.595  |
| 0.496  |

|        |
|--------|
| 1.245  |
| 0.494  |
| 0.343  |
| 0.372  |
| 0.967  |
| 0.591  |
| 1.524  |
| #NUM!  |
| 0.264  |
| 0.541  |
| -0.121 |
| 0.304  |
| 0.491  |
| 0.367  |
| 1.825  |
| #NUM!  |
| #NUM!  |
| 0.021  |
| -0.664 |
| -0.273 |
| 0.479  |
| 0.146  |
| 0.249  |
| 0.338  |
| 0.149  |
| -0.177 |
| 0.475  |
| 0.165  |
| 0.013  |
| 1.828  |
| -0.061 |
| 0.112  |
| 0.579  |
| 0.171  |
| 0.677  |
| 0.221  |
| -0.154 |
| 0.240  |
| 0.449  |
| -0.206 |
| 1.051  |
| -0.044 |
| #NUM!  |
| 0.514  |
| 0.662  |
| 0.207  |
| -0.042 |
| -0.294 |
| 0.189  |
| -0.083 |
| -0.333 |

|        |
|--------|
| -0.471 |
| -0.008 |
| 0.112  |
| #NUM!  |
| 0.826  |
| -0.950 |
| #NUM!  |
| 0.109  |
| 0.176  |
| -0.366 |
| -1.151 |
| 0.173  |
| 0.298  |
| -0.332 |
| #NUM!  |
| 0.079  |
| 0.434  |
| -0.323 |
| 0.481  |
| 0.221  |
| 0.251  |
| 0.199  |
| -0.057 |
| 0.328  |
| 1.042  |
| 0.701  |
| 0.621  |
| 0.343  |
| #NUM!  |
| 1.161  |
| 0.266  |
| 0.140  |
| -2.838 |
| 0.589  |
| -0.587 |
| -0.087 |
| -0.572 |
| 0.180  |
| 0.197  |
| 0.150  |
| 0.986  |
| 0.092  |
| -0.030 |
| 0.201  |
| #NUM!  |
| #NUM!  |
| -0.034 |
| -0.697 |
| 0.270  |
| 1.914  |
| 0.281  |

|        |
|--------|
| #NUM!  |
| 0.258  |
| 0.736  |
| -0.530 |
| #NUM!  |
| -0.054 |
| 0.383  |
| -0.104 |
| 0.471  |
| 0.100  |
| 0.496  |
| -0.054 |
| -0.141 |
| -0.170 |
| -0.281 |
| 0.254  |
| #NUM!  |
| 0.562  |
| -1.488 |
| -0.313 |
| 1.069  |
| 0.334  |
| 0.358  |
| #NUM!  |
| 0.220  |
| 0.522  |
| -3.050 |
| 1.287  |
| 0.341  |
| #NUM!  |
| -0.686 |
| 0.499  |
| -2.221 |
| #NUM!  |
| #NUM!  |
| 0.543  |
| 0.301  |
| #NUM!  |
| 0.158  |
| 2.187  |
| 0.574  |
| #NUM!  |
| 0.238  |
| -0.277 |
| 0.836  |
| -0.737 |
| 0.236  |
| #NUM!  |
| -1.568 |
| #NUM!  |
| 2.028  |

|        |
|--------|
| 0.160  |
| 0.180  |
| 0.410  |
| 0.938  |
| 0.475  |
| #NUM!  |
| -0.048 |
| 0.495  |
| 0.078  |
| -0.452 |
| 0.731  |
| 0.684  |
| 0.215  |
| 0.439  |
| -0.206 |
| 0.643  |
| 0.862  |
| #NUM!  |
| 0.384  |
| 0.284  |
| -0.664 |
| 0.114  |
| 0.217  |
| 0.220  |
| 0.268  |
| 0.162  |
| 0.418  |
| 0.121  |
| 0.608  |
| -0.628 |
| 0.003  |
| 0.328  |
| -0.077 |
| -0.869 |
| 0.059  |
| -1.245 |
| 0.395  |
| #NUM!  |
| 0.501  |
| 0.325  |
| 0.509  |
| 0.250  |
| 0.521  |
| 0.149  |
| 0.275  |
| 0.706  |
| -0.222 |
| 0.233  |
| 0.293  |
| 1.082  |
| 0.117  |

|        |
|--------|
| 0.428  |
| #NUM!  |
| -0.001 |
| -0.271 |
| 1.098  |
| -0.111 |
| -0.271 |
| 0.860  |
| 0.216  |
| #NUM!  |
| 0.105  |
| 0.513  |
| 1.142  |
| 0.213  |
| 0.105  |
| 0.588  |
| 0.599  |
| 0.472  |
| -0.920 |
| -0.565 |
| 0.417  |
| 0.452  |
| 0.508  |
| 0.056  |
| #NUM!  |
| 0.277  |
| 0.578  |
| 0.209  |
| 1.309  |
| 1.751  |
| 0.286  |
| 0.882  |
| 0.395  |
| -0.144 |
| 0.259  |
| #NUM!  |
| 0.813  |
| 0.533  |
| 0.890  |
| 0.257  |
| 0.355  |
| 0.169  |
| 0.725  |
| 0.095  |
| #NUM!  |
| 0.217  |
| #NUM!  |
| 0.815  |
| 1.403  |
| 0.534  |
| -0.635 |



|        |
|--------|
| 1.130  |
| 0.328  |
| 0.899  |
| 0.399  |
| 1.320  |
| #NUM!  |
| 0.671  |
| 1.812  |
| 0.337  |
| #NUM!  |
| #NUM!  |
| #NUM!  |
| #NUM!  |
| 0.185  |
| 0.300  |
| #NUM!  |
| 0.226  |
| #NUM!  |
| 0.693  |
| -0.121 |
| 0.281  |
| -2.005 |
| 0.111  |
| -0.516 |
| 0.478  |
| #NUM!  |
| -0.987 |
| 0.064  |
| #NUM!  |
| 0.308  |
| -0.047 |
| 0.931  |
| -0.151 |
| 0.185  |
| 0.673  |
| 0.310  |
| #NUM!  |
| -0.831 |
| 0.196  |
| 0.605  |
| #NUM!  |
| 0.423  |
| -0.123 |
| #NUM!  |
| 0.411  |
| -0.539 |
| 0.497  |
| -0.039 |
| #NUM!  |
| -0.173 |
| 0.328  |

|        |
|--------|
| 0.067  |
| 0.513  |
| 0.492  |
| #NUM!  |
| -0.261 |
| 0.427  |
| -0.153 |
| 0.325  |
| 0.131  |
| -2.583 |
| #NUM!  |
| #NUM!  |
| #NUM!  |
| #NUM!  |
| -0.020 |
| 0.253  |
| -0.471 |
| 0.175  |
| -0.242 |
| 0.655  |
| 0.217  |
| -0.427 |
| 0.399  |
| 0.659  |
| -0.293 |
| 0.844  |
| #NUM!  |
| 0.134  |
| 0.340  |
| 0.220  |
| 0.440  |
| 0.221  |
| 0.248  |
| -0.295 |
| -0.036 |
| 0.443  |
| #NUM!  |
| -0.166 |
| #NUM!  |
| 0.008  |
| -1.414 |
| 0.147  |
| 1.441  |
| 0.374  |
| -0.526 |
| 0.205  |
| -0.312 |
| 0.395  |
| -0.015 |
| 0.326  |
| #NUM!  |

|        |
|--------|
| 0.758  |
| #NUM!  |
| -1.137 |
| #NUM!  |
| -0.042 |
| -0.434 |
| 0.151  |
| 0.174  |
| -0.149 |
| #NUM!  |
| -0.003 |
| -1.609 |
| -0.408 |
| -0.853 |
| -0.163 |
| 0.017  |
| 0.171  |
| 0.125  |
| 0.415  |
| 0.151  |
| 0.066  |
| 0.066  |
| 0.585  |
| -0.376 |
| 0.446  |
| -0.319 |
| 0.316  |
| 0.186  |
| 0.517  |
| -0.269 |
| 0.364  |
| #NUM!  |
| 0.564  |
| #NUM!  |
| 0.333  |
| -0.390 |
| 0.590  |
| -0.093 |
| 0.543  |
| -0.883 |
| -0.746 |
| 0.153  |
| 0.561  |
| -0.231 |
| -1.035 |
| 0.415  |
| -0.145 |
| -0.907 |
| -0.075 |
| -0.465 |
| #NUM!  |

|        |
|--------|
| 0.756  |
| -0.013 |
| 0.291  |
| 0.900  |
| 0.670  |
| 0.490  |
| 1.666  |
| 0.850  |
| #NUM!  |
| 0.689  |
| -0.066 |
| 0.551  |
| -0.069 |
| 0.062  |
| -1.093 |
| #NUM!  |
| 0.349  |
| 0.651  |
| 2.445  |
| -0.856 |
| 1.808  |
| 0.409  |
| #NUM!  |
| #NUM!  |
| 0.439  |
| 0.639  |
| 0.461  |
| 0.044  |
| 0.269  |
| 1.040  |
| -0.188 |
| -0.278 |
| 0.140  |
| #NUM!  |
| -0.126 |
| 2.772  |
| 0.210  |
| #NUM!  |
| -1.230 |
| 0.944  |
| -0.040 |
| -0.338 |
| 0.832  |
| -0.094 |
| -0.185 |
| 1.179  |
| 0.672  |
| 0.137  |
| #NUM!  |
| -1.397 |
| -2.838 |

|        |
|--------|
| -0.402 |
| 0.739  |
| -0.428 |
| 0.474  |
| #NUM!  |
| -0.249 |
| -0.115 |
| -0.294 |
| -0.492 |
| 0.397  |
| 0.529  |
| 0.246  |
| -1.412 |
| #NUM!  |
| 0.552  |
| 1.624  |
| 0.044  |
| -0.367 |
| 0.846  |
| -0.066 |
| 0.396  |
| 0.452  |
| 0.426  |
| 0.149  |
| 0.615  |
| #NUM!  |
| 0.827  |
| -0.066 |
| 0.912  |
| -1.520 |
| -0.602 |
| -1.028 |
| #NUM!  |
| #NUM!  |
| #NUM!  |
| 0.897  |
| -0.209 |
| #NUM!  |
| -0.268 |
| 0.036  |
| -0.785 |
| -0.477 |
| 0.132  |
| 0.648  |
| #NUM!  |
| 0.216  |
| 0.559  |
| 0.840  |
| 0.589  |
| #NUM!  |
| 0.541  |

|        |
|--------|
| -0.505 |
| -0.170 |
| -0.252 |
| 0.558  |
| -0.356 |
| 0.034  |
| -0.455 |
| 0.470  |
| -0.547 |
| 0.210  |
| -0.060 |
| 0.733  |
| -0.311 |
| -1.458 |
| -0.217 |
| -0.809 |
| 0.414  |
| -0.207 |
| 0.047  |
| 0.180  |
| 0.032  |
| 0.463  |
| 0.549  |
| -0.600 |
| #NUM!  |
| #NUM!  |
| -0.539 |
| 0.396  |
| -1.123 |
| 0.504  |
| 0.133  |
| 1.295  |
| -0.272 |
| 0.263  |
| 0.717  |
| 0.660  |
| 0.223  |
| -0.214 |
| -0.274 |
| #NUM!  |
| -0.092 |
| 0.169  |
| 0.549  |
| #NUM!  |
| #NUM!  |
| 0.378  |
| 0.118  |
| 0.083  |
| 0.281  |
| -0.410 |
| 0.463  |

|        |
|--------|
| 0.168  |
| 0.623  |
| #NUM!  |
| 0.317  |
| 0.217  |
| 0.408  |
| 0.463  |
| -1.098 |
| 1.338  |
| 0.203  |
| -0.078 |
| -0.076 |
| -0.484 |
| -1.701 |
| #NUM!  |
| -2.506 |
| 0.105  |
| 0.981  |
| 0.985  |
| #NUM!  |
| -0.166 |
| -1.505 |
| 1.327  |
| -0.270 |
| -0.230 |
| -0.190 |
| -0.404 |
| 0.102  |
| 0.133  |
| #NUM!  |
| 0.934  |
| 2.049  |
| -0.586 |
| 0.011  |
| -0.351 |
| #NUM!  |
| 0.109  |
| 0.302  |
| 0.165  |
| -0.176 |
| 0.138  |
| -1.197 |
| 0.233  |
| 0.202  |
| #NUM!  |
| 0.377  |
| 0.562  |
| 0.129  |
| 0.201  |
| -0.321 |
| -0.118 |

|        |
|--------|
| -0.697 |
| 0.401  |
| 0.163  |
| 0.104  |
| 0.481  |
| -0.166 |
| 0.029  |
| -0.084 |
| 0.748  |
| 0.055  |
| -0.103 |
| -0.967 |
| -0.183 |
| -0.880 |
| -0.354 |
| 0.497  |
| -0.823 |
| -0.194 |
| -0.248 |
| 0.315  |
| -0.138 |
| -0.180 |
| -0.722 |
| #NUM!  |
| 0.545  |
| 0.491  |
| 0.254  |
| #NUM!  |
| 0.453  |
| 0.100  |
| 0.259  |
| -0.052 |
| -0.071 |
| 0.327  |
| 0.958  |
| -0.503 |
| 1.037  |
| -0.919 |
| -1.641 |
| -1.117 |
| -0.056 |
| -0.157 |
| 0.626  |
| #NUM!  |
| -0.225 |
| #NUM!  |
| #NUM!  |
| -0.759 |
| -0.289 |
| 0.741  |
| -0.363 |



|        |
|--------|
| 0.502  |
| #NUM!  |
| -0.306 |
| -1.507 |
| -0.314 |
| -0.621 |
| 0.232  |
| -1.676 |
| #NUM!  |
| #NUM!  |
| 0.175  |
| 0.356  |
| 0.100  |
| 1.416  |
| #NUM!  |
| 1.766  |
| #NUM!  |
| 0.634  |
| 1.034  |
| -0.133 |
| -0.227 |
| 0.462  |
| -0.528 |
| 0.492  |
| 1.303  |
| 0.078  |
| 0.180  |
| -0.091 |
| 0.789  |
| #NUM!  |
| -0.028 |
| -0.285 |
| -0.869 |
| 0.246  |
| 1.061  |
| 0.534  |
| 0.293  |
| 0.357  |
| 0.476  |
| 0.258  |
| -0.019 |
| -0.221 |
| -0.125 |
| -0.213 |
| 0.065  |
| -0.026 |
| 0.311  |
| 0.307  |
| 0.363  |
| -0.123 |
| 0.478  |

|        |
|--------|
| 0.053  |
| 0.180  |
| -0.253 |
| -1.112 |
| #NUM!  |
| -0.376 |
| -0.319 |
| 1.127  |
| 0.242  |
| 0.468  |
| 1.283  |
| 0.339  |
| #NUM!  |
| -0.301 |
| -0.088 |
| -0.610 |
| #NUM!  |
| 0.629  |
| 1.200  |
| #NUM!  |
| 0.062  |
| 0.143  |
| -1.504 |
| -0.301 |
| 0.057  |
| 0.066  |
| 0.757  |
| -0.079 |
| 0.582  |
| 0.517  |
| 0.442  |
| -0.078 |
| #NUM!  |
| 0.412  |
| 0.298  |
| 0.064  |
| -0.026 |
| 0.642  |
| -0.169 |
| 0.121  |
| 0.430  |
| -0.124 |
| -0.066 |
| 0.100  |
| 0.562  |
| 0.343  |
| 0.320  |
| 0.310  |
| 0.419  |
| 0.751  |
| 0.546  |

|        |
|--------|
| 0.307  |
| 1.102  |
| 0.637  |
| 0.008  |
| 0.932  |
| 1.153  |
| 0.678  |
| 0.391  |
| 0.656  |
| 0.806  |
| 0.076  |
| -0.092 |
| 0.027  |
| 0.100  |
| 0.279  |
| 0.148  |
| -0.530 |
| 0.242  |
| 0.044  |
| 0.218  |
| 0.545  |
| 0.410  |
| -0.573 |
| -0.021 |
| #NUM!  |
| -0.097 |
| 0.452  |
| 0.220  |
| 0.171  |
| 0.209  |
| -0.280 |
| 0.124  |
| 1.597  |
| -0.016 |
| 0.399  |
| 0.809  |
| 0.213  |
| 0.895  |
| -0.159 |
| 0.415  |
| 0.481  |
| 0.371  |
| -0.037 |
| -0.072 |
| 0.058  |
| 0.061  |
| 0.199  |
| #NUM!  |
| 0.479  |
| 0.043  |
| 0.341  |

|        |
|--------|
| 0.179  |
| -0.719 |
| 0.168  |
| 0.256  |
| -0.343 |
| #NUM!  |
| -0.318 |
| -0.495 |
| 1.170  |
| 0.094  |
| -0.595 |
| 0.179  |
| 3.729  |
| -0.517 |
| -0.058 |
| #NUM!  |
| -2.803 |
| -0.890 |
| 0.191  |
| #NUM!  |
| 0.223  |
| 0.272  |
| 0.228  |
| 0.170  |
| 0.639  |
| 0.554  |
| 0.353  |
| 0.817  |
| #NUM!  |
| #NUM!  |
| 0.371  |
| 0.205  |
| #NUM!  |
| 0.556  |
| -0.685 |
| 0.441  |
| 0.178  |
| -0.612 |
| 0.438  |
| #NUM!  |
| 0.153  |
| 0.526  |
| 0.479  |
| 0.336  |
| 0.589  |
| 0.339  |
| -0.290 |
| -0.294 |
| 0.462  |
| 0.507  |
| #NUM!  |

|        |
|--------|
| 0.201  |
| -0.288 |
| 0.076  |
| 0.571  |
| 0.491  |
| -1.340 |
| -0.253 |
| -0.531 |
| 0.678  |
| 0.160  |
| -0.763 |
| -1.046 |
| 0.644  |
| 0.347  |
| #NUM!  |
| -0.672 |
| #NUM!  |
| 2.443  |
| #NUM!  |
| -0.109 |
| 0.286  |
| 0.009  |
| 0.397  |
| 0.545  |
| 0.207  |
| 0.978  |
| 1.061  |
| 0.350  |
| 0.696  |
| 0.328  |
| -1.239 |
| 0.632  |
| 0.585  |
| -0.505 |
| -0.043 |
| -0.343 |
| 1.202  |
| 0.992  |
| 0.917  |
| 0.372  |
| 1.001  |
| 0.140  |
| #NUM!  |
| 0.232  |
| -0.448 |
| -0.336 |
| 0.511  |
| 0.134  |
| 0.035  |
| 0.287  |
| 0.690  |

|        |
|--------|
| #NUM!  |
| -0.182 |
| 0.100  |
| 0.834  |
| -0.010 |
| #NUM!  |
| -1.247 |
| -0.778 |
| 0.235  |
| 0.363  |
| -0.319 |
| #NUM!  |
| -0.538 |
| #NUM!  |
| -0.079 |
| -0.035 |
| #NUM!  |
| #NUM!  |
| 0.058  |
| 0.441  |
| 0.153  |
| 0.043  |
| #NUM!  |
| 0.967  |
| -0.627 |
| -0.324 |
| 0.091  |
| 0.751  |
| 0.071  |
| 2.193  |
| 0.149  |
| 0.108  |
| 0.344  |
| 1.476  |
| -0.406 |
| 1.117  |
| -0.597 |
| 0.117  |
| 0.935  |
| #NUM!  |
| #NUM!  |
| 1.175  |
| 0.468  |
| -0.242 |
| 0.193  |
| 1.111  |
| 2.305  |
| 0.718  |
| 1.030  |
| -0.311 |
| 0.959  |

|        |
|--------|
| 0.393  |
| 0.283  |
| 0.039  |
| 0.143  |
| -0.110 |
| 0.783  |
| 0.388  |
| -1.072 |
| -0.118 |
| 0.341  |
| -0.661 |
| 1.589  |
| 1.215  |
| -0.336 |
| 0.547  |
| 0.263  |
| -1.628 |
| -0.447 |
| 0.316  |
| 0.663  |
| 0.704  |
| 0.618  |
| 0.219  |
| 0.835  |
| -0.297 |
| -0.280 |
| 0.182  |
| 0.205  |
| 0.301  |
| 0.057  |
| -0.019 |
| -0.294 |
| 0.059  |
| 0.414  |
| #NUM!  |
| #NUM!  |
| #NUM!  |
| 0.363  |
| -0.134 |
| -0.455 |
| #NUM!  |
| 0.184  |
| 1.062  |
| 0.081  |
| 0.230  |
| 1.045  |
| 0.209  |
| -0.361 |
| -0.338 |
| #NUM!  |
| -0.477 |

|        |
|--------|
| -0.818 |
| 0.199  |
| 0.047  |
| -0.370 |
| #NUM!  |
| #NUM!  |
| 1.436  |
| 1.538  |
| #NUM!  |
| 0.049  |
| 1.303  |
| 2.042  |
| 0.505  |
| 1.092  |
| 0.387  |
| #NUM!  |
| -0.634 |
| #NUM!  |
| 0.652  |
| #NUM!  |
| -0.408 |
| -0.057 |
| -1.068 |
| 0.126  |
| #NUM!  |
| -0.224 |
| -0.627 |
| -1.464 |
| #NUM!  |
| 0.340  |
| -1.013 |
| -0.273 |
| -0.354 |
| -2.410 |
| 0.052  |
| 0.921  |
| #NUM!  |
| -0.204 |
| -1.731 |
| -0.088 |
| #NUM!  |
| 0.765  |
| -0.143 |
| 0.124  |
| 0.201  |
| 0.486  |
| -0.068 |
| -0.751 |
| -0.055 |
| 0.203  |
| #NUM!  |



|        |
|--------|
| -0.589 |
| 0.359  |
| #NUM!  |
| 0.198  |
| 0.473  |
| 1.383  |
| -1.674 |
| #NUM!  |
| -0.789 |
| 0.588  |
| -0.227 |
| #NUM!  |
| #NUM!  |
| -0.208 |
| #NUM!  |
| #NUM!  |
| #NUM!  |
| #NUM!  |
| -0.925 |
| 0.102  |
| #NUM!  |
| #NUM!  |
| -0.676 |
| -1.811 |
| 0.149  |
| 0.309  |
| 0.445  |
| #NUM!  |
| -0.678 |
| #NUM!  |
| -0.508 |
| -0.008 |
| -0.648 |
| -0.278 |
| #NUM!  |
| -0.234 |
| -0.491 |
| #NUM!  |
| 0.439  |
| -0.031 |
| 0.307  |
| 0.211  |
| 0.876  |
| -0.581 |
| 1.453  |
| 0.066  |
| 0.492  |
| -1.314 |
| -0.474 |
| 0.201  |
| 0.347  |

|        |
|--------|
| 1.199  |
| -0.197 |
| 1.194  |
| 0.571  |
| -0.316 |
| -0.168 |
| 0.434  |
| #NUM!  |
| #NUM!  |
| 0.100  |
| -0.714 |
| #NUM!  |
| 1.187  |
| -0.390 |
| 0.426  |
| 0.816  |
| #NUM!  |
| -0.003 |
| -0.133 |
| 0.089  |
| 0.690  |
| -0.336 |
| 0.301  |
| -0.256 |
| -0.931 |
| 0.185  |
| 0.335  |
| 0.031  |
| 1.091  |
| -0.436 |
| -1.642 |
| #NUM!  |
| #NUM!  |
| -0.147 |
| 0.165  |
| #NUM!  |
| -2.385 |
| -0.675 |
| 0.219  |
| 0.074  |
| 0.099  |
| 0.766  |
| 0.034  |
| 1.101  |
| 0.502  |
| 0.583  |
| 1.164  |
| 0.134  |
| -0.344 |
| 0.433  |
| #NUM!  |

|        |
|--------|
| 0.903  |
| 0.155  |
| 0.456  |
| 0.262  |
| 1.102  |
| -0.112 |
| -0.780 |
| 0.348  |
| 0.331  |
| 0.014  |
| 0.393  |
| -0.181 |
| 0.285  |
| 1.031  |
| 0.277  |
| 0.278  |
| -0.688 |
| 0.444  |
| 0.330  |
| 0.479  |
| 0.532  |
| 0.372  |
| 0.050  |
| -0.385 |
| -0.276 |
| 0.109  |
| -0.616 |
| 0.730  |
| -0.581 |
| #NUM!  |
| -0.338 |
| 1.400  |
| -0.096 |
| 0.458  |
| -0.581 |
| 0.112  |
| #NUM!  |
| -1.835 |
| -0.372 |
| #NUM!  |
| 0.797  |
| 0.380  |
| 0.116  |
| -0.708 |
| #NUM!  |
| 0.857  |
| #NUM!  |

|        |
|--------|
| 0.259  |
| -0.600 |
| -0.048 |
| -0.420 |
| -1.175 |
| -0.370 |
| 2.780  |
| #NUM!  |
| #NUM!  |
| 0.350  |
| 0.235  |
| -0.500 |
| 0.196  |
| -0.029 |
| -0.598 |
| 0.018  |
| -0.297 |
| -0.110 |
| 1.652  |
| 0.342  |
| 0.897  |
| 0.347  |
| 0.780  |
| 0.031  |
| 0.490  |
| 0.383  |
| -0.349 |
| 0.403  |
| -0.334 |
| #NUM!  |
| 0.244  |
| -0.668 |
| -0.312 |
| 0.462  |
| #NUM!  |
| #NUM!  |
| -2.068 |
| 2.053  |
| -0.535 |
| 0.642  |
| #NUM!  |
| -0.148 |
| -0.819 |
| 0.689  |
| -0.316 |
| #NUM!  |
| 0.572  |
| 1.577  |
| 0.191  |
| 1.047  |
| 0.244  |

|        |
|--------|
| 0.363  |
| -0.001 |
| 0.140  |
| 0.091  |
| -0.043 |
| 0.263  |
| 0.192  |
| 0.586  |
| 2.111  |
| 0.165  |
| #NUM!  |
| -0.174 |
| -0.075 |
| 0.474  |
| 1.042  |
| 0.513  |
| 0.499  |
| #NUM!  |
| -0.563 |
| 1.294  |
| 3.006  |
| -1.317 |
| 1.120  |
| -1.172 |
| -2.531 |
| 0.499  |
| -0.186 |
| -0.807 |
| 0.453  |
| 0.201  |
| #NUM!  |
| 1.054  |
| #NUM!  |
| 0.329  |
| 1.897  |
| 0.818  |
| 0.295  |
| -0.496 |
| 0.137  |
| 0.355  |
| -0.014 |
| -0.202 |
| 2.587  |
| 0.282  |
| -0.373 |
| 0.242  |
| 0.146  |
| -0.681 |
| 0.239  |
| 0.769  |
| -1.339 |

|        |
|--------|
| 0.402  |
| -0.299 |
| 0.093  |
| 0.469  |
| 0.085  |
| 0.458  |
| 0.002  |
| 0.186  |
| 0.284  |
| 0.022  |
| 0.811  |
| 0.276  |
| -0.211 |
| 0.323  |
| #NUM!  |
| -0.307 |
| -0.066 |
| -0.915 |
| 1.359  |
| 0.261  |
| 1.163  |
| -0.359 |
| 0.032  |
| #NUM!  |
| 0.365  |
| -0.238 |
| 1.113  |
| -0.233 |
| 0.785  |
| 0.115  |
| -1.223 |
| 0.475  |
| 0.344  |
| -0.873 |
| 1.408  |
| -0.342 |
| 1.207  |
| #NUM!  |
| 0.243  |
| -0.708 |
| 0.159  |
| 2.122  |
| 0.044  |
| -0.406 |
| -0.041 |
| -0.205 |
| 0.659  |
| -0.488 |
| 0.283  |
| -0.163 |
| -0.113 |

|        |
|--------|
| 0.513  |
| 0.442  |
| 0.811  |
| -0.290 |
| 1.831  |
| 0.288  |
| -0.838 |
| -0.017 |
| 0.899  |
| -0.680 |
| 0.340  |
| #NUM!  |
| 0.064  |
| 1.545  |
| -0.068 |
| 0.448  |
| 0.278  |
| 0.419  |
| 0.554  |
| #NUM!  |
| -2.252 |
| 0.583  |
| 0.442  |
| #NUM!  |
| 0.020  |
| -0.486 |
| 0.145  |
| #NUM!  |
| 0.266  |
| 0.461  |
| -0.132 |
| #NUM!  |
| 0.081  |
| 0.274  |
| 0.358  |
| -1.427 |
| -0.247 |
| -0.833 |
| 0.399  |
| 0.238  |
| -0.965 |
| -0.018 |
| 0.365  |
| 0.343  |
| 0.240  |
| 0.478  |
| 0.195  |
| 0.832  |
| #NUM!  |
| 0.141  |
| 0.195  |

|        |
|--------|
| 0.269  |
| #NUM!  |
| #NUM!  |
| 0.104  |
| 0.030  |
| 0.434  |
| 0.400  |
| #NUM!  |
| #NUM!  |
| 0.578  |
| 0.474  |
| #NUM!  |
| 0.135  |
| 0.097  |
| #NUM!  |
| -0.825 |
| #NUM!  |
| 0.971  |
| 0.624  |
| 0.217  |
| #NUM!  |
| 2.034  |
| 0.454  |
| 0.647  |
| -0.441 |
| -0.530 |
| 0.142  |
| -0.382 |
| 1.217  |
| 0.379  |
| 0.283  |
| 1.912  |
| -0.309 |
| -0.065 |
| #NUM!  |
| 0.849  |
| -0.913 |
| 0.027  |
| 0.133  |
| -1.046 |
| 0.484  |
| -0.745 |
| -0.534 |
| -0.266 |
| 0.408  |
| -0.967 |
| 0.200  |
| 0.163  |
| -0.184 |
| 0.082  |
| 0.374  |



|        |
|--------|
| 0.702  |
| -0.021 |
| -0.333 |
| 0.465  |
| 0.721  |
| 0.155  |
| 0.090  |
| -0.215 |
| 0.165  |
| 0.046  |
| #NUM!  |
| -0.605 |
| -0.132 |
| 0.082  |
| #NUM!  |
| 0.494  |
| 0.282  |
| -0.808 |
| 0.235  |
| -0.429 |
| 0.552  |
| 0.447  |
| 0.663  |
| 0.360  |
| 0.258  |
| -0.227 |
| #NUM!  |
| 0.337  |
| -0.184 |
| #NUM!  |
| -0.323 |
| -0.039 |
| -0.275 |
| 0.541  |
| 0.339  |
| 0.050  |
| -0.323 |
| 0.103  |
| 0.267  |
| 0.328  |
| -0.362 |
| 0.144  |
| 0.105  |
| #NUM!  |
| 0.263  |
| -0.149 |
| 0.575  |
| 0.305  |
| 0.208  |
| -1.813 |
| 0.542  |

|        |
|--------|
| 0.321  |
| -0.022 |
| 0.645  |
| -1.637 |
| 0.107  |
| 0.141  |
| -0.241 |
| #NUM!  |
| -0.228 |
| -0.105 |
| 0.177  |
| -0.672 |
| -1.120 |
| -0.050 |
| 0.648  |
| 1.395  |
| 0.647  |
| -0.025 |
| -0.063 |
| -0.684 |
| 0.064  |
| -0.336 |
| -0.231 |
| #NUM!  |
| -0.286 |
| -2.095 |
| #NUM!  |
| -0.409 |
| #NUM!  |
| 0.436  |
| 0.261  |
| 0.081  |
| 0.475  |
| 1.125  |
| 0.257  |
| 0.173  |
| -0.143 |
| -0.169 |
| 0.397  |
| 0.381  |
| #NUM!  |
| -0.776 |
| 0.066  |
| 0.625  |
| 0.550  |
| 0.197  |
| 0.589  |
| 0.066  |
| 0.754  |
| -0.372 |
| 0.018  |

|        |
|--------|
| #NUM!  |
| 0.213  |
| #NUM!  |
| 0.224  |
| 0.162  |
| 0.905  |
| 1.567  |
| 0.000  |
| 0.384  |
| -0.697 |
| #NUM!  |
| #NUM!  |
| #NUM!  |
| #NUM!  |
| -0.406 |
| #NUM!  |
| -0.750 |
| -0.838 |
| 0.027  |
| -0.234 |
| -0.253 |
| 0.189  |
| -0.297 |
| -0.177 |
| #NUM!  |
| 0.474  |
| 0.483  |
| 0.282  |
| -0.217 |
| -0.089 |
| 0.102  |
| 0.361  |
| -1.041 |
| 0.199  |
| 0.296  |
| #NUM!  |
| 1.925  |
| 0.552  |
| 0.419  |
| 0.002  |
| 0.390  |
| -0.191 |
| -0.111 |
| -0.232 |
| 0.275  |
| #NUM!  |
| #NUM!  |
| -0.156 |
| #NUM!  |
| 0.290  |
| 0.282  |

|        |
|--------|
| 0.313  |
| 0.135  |
| 0.201  |
| 0.764  |
| 0.477  |
| 0.405  |
| 1.205  |
| -0.458 |
| -0.361 |
| 0.314  |
| 0.368  |
| 0.745  |
| -0.242 |
| 1.670  |
| 0.587  |
| #NUM!  |
| -0.496 |
| 0.401  |
| #NUM!  |
| -0.240 |
| -0.494 |
| -0.138 |
| -0.313 |
| 0.371  |
| 0.566  |
| -1.233 |
| 0.024  |
| -1.512 |
| 0.412  |
| 0.538  |
| 0.473  |
| 0.446  |
| 0.586  |
| 0.346  |
| -0.582 |
| 0.286  |
| 0.363  |
| 0.228  |
| 0.028  |
| -0.053 |
| 0.301  |
| 0.033  |
| -0.066 |
| 0.669  |
| 0.060  |
| 0.041  |
| 0.151  |
| 0.071  |
| 0.349  |
| 0.269  |
| 0.603  |

|        |
|--------|
| -0.023 |
| -0.305 |
| 0.237  |
| 0.632  |
| #NUM!  |
| -0.591 |
| 0.962  |
| #NUM!  |
| #NUM!  |
| -2.335 |
| 0.782  |
| -0.369 |
| 0.365  |
| 1.049  |
| -0.458 |
| 1.347  |
| 0.156  |
| 1.597  |
| 0.628  |
| -0.337 |
| -0.029 |
| -0.037 |
| #NUM!  |
| #NUM!  |
| #NUM!  |
| -1.084 |
| #NUM!  |
| #NUM!  |
| 0.258  |
| #NUM!  |
| -0.488 |
| -0.678 |
| -1.194 |
| -2.468 |
| -2.089 |
| -2.838 |
| -0.182 |
| 0.717  |
| 0.396  |
| 0.063  |
| 0.006  |
| 0.309  |
| 0.027  |
| -0.598 |
| 0.435  |
| 0.638  |
| 0.835  |
| #NUM!  |
| 0.192  |
| 0.151  |
| 0.078  |

|        |
|--------|
| -0.409 |
| #NUM!  |
| 1.383  |
| 0.602  |
| 1.182  |
| 0.269  |
| 0.155  |
| -2.207 |
| -0.040 |
| 0.211  |
| 0.253  |
| 0.503  |
| 0.264  |
| -0.390 |
| 0.253  |
| -0.675 |
| -0.125 |
| 0.064  |
| 0.170  |
| -0.135 |
| -0.276 |
| 0.239  |
| 0.415  |
| 0.257  |
| 0.215  |
| 0.217  |
| 0.382  |
| -0.216 |
| 0.041  |
| -0.464 |
| -0.256 |
| -0.514 |
| 0.181  |
| 2.385  |
| 0.360  |
| -0.472 |
| 0.759  |
| -0.164 |
| -0.474 |
| 0.839  |
| -0.888 |
| #NUM!  |
| -0.071 |
| -0.145 |
| -0.463 |
| 0.311  |
| -0.051 |
| 0.114  |
| -0.235 |
| -0.719 |
| 1.104  |

|        |
|--------|
| -0.091 |
| 0.155  |
| 0.510  |
| -0.231 |
| -0.098 |
| -0.153 |
| -0.053 |
| #NUM!  |
| -0.364 |
| 1.056  |
| 0.302  |
| 0.368  |
| -0.194 |
| 0.143  |
| 0.161  |
| 0.429  |
| -0.004 |
| 0.327  |
| 0.262  |
| -0.391 |
| 0.380  |
| 0.627  |
| -0.196 |
| -0.636 |
| 0.209  |
| 1.172  |
| -0.138 |
| -0.051 |
| 0.196  |
| 0.474  |
| -0.250 |
| 0.248  |
| -0.499 |
| -0.221 |
| 0.631  |
| -0.730 |
| #NUM!  |
| 0.365  |
| 0.460  |
| 0.104  |
| #NUM!  |
| #NUM!  |
| -0.065 |
| -0.272 |
| 0.738  |
| -0.179 |
| 0.683  |
| #NUM!  |
| 1.215  |
| -0.945 |
| #NUM!  |

|        |
|--------|
| #NUM!  |
| 0.898  |
| 0.214  |
| -1.101 |
| -0.113 |
| 0.246  |
| -1.285 |
| 0.455  |
| 0.356  |
| 0.397  |
| -0.016 |
| -0.352 |
| #NUM!  |
| 0.484  |
| 0.414  |
| 0.081  |
| 0.147  |
| 0.443  |
| -0.548 |
| -0.088 |
| 0.027  |
| 0.191  |
| 0.120  |
| -0.350 |
| -1.926 |
| 0.199  |
| 0.345  |
| -0.279 |
| 0.114  |
| 0.224  |
| 0.686  |
| 0.213  |
| -0.284 |
| 0.504  |
| 0.260  |
| 0.370  |
| #NUM!  |
| 0.511  |
| 0.594  |
| 1.037  |
| -0.528 |
| -0.117 |
| 0.110  |
| -0.843 |
| #NUM!  |
| #NUM!  |
| -0.201 |
| 0.830  |
| -1.317 |
| 0.744  |
| 0.111  |



|        |
|--------|
| 0.580  |
| 0.468  |
| #NUM!  |
| -0.114 |
| 0.379  |
| 0.143  |
| 0.449  |
| 0.099  |
| #NUM!  |
| 0.718  |
| 0.234  |
| -0.570 |
| #NUM!  |
| -1.724 |
| -0.241 |
| -0.134 |
| 0.862  |
| 0.297  |
| -0.344 |
| -0.387 |
| -0.612 |
| -1.534 |
| -0.888 |
| -0.050 |
| #NUM!  |
| #NUM!  |
| 0.240  |
| #NUM!  |
| 0.167  |
| -0.111 |
| #NUM!  |
| 0.169  |
| 0.262  |
| 0.443  |
| -0.555 |
| -0.487 |
| 0.127  |
| -0.240 |
| -0.781 |
| #NUM!  |
| -1.359 |
| -0.465 |
| -0.146 |
| 0.065  |
| 0.228  |
| 0.587  |
| #NUM!  |
| 0.106  |
| 0.579  |
| 0.519  |
| 0.005  |

|        |
|--------|
| 2.289  |
| 0.391  |
| 0.735  |
| 0.023  |
| -0.547 |
| 0.123  |
| -0.447 |
| -0.192 |
| 0.522  |
| -0.976 |
| -0.828 |
| -0.094 |
| -0.284 |
| #NUM!  |
| 0.273  |
| 0.030  |
| -0.274 |
| 0.000  |
| 0.527  |
| 0.389  |
| 0.747  |
| #NUM!  |
| 1.004  |
| -0.323 |
| -0.186 |
| -0.180 |
| 0.337  |
| #NUM!  |
| -0.245 |
| 0.650  |
| 0.019  |
| -0.032 |
| 0.991  |
| -0.086 |
| -0.002 |
| -0.110 |
| 1.240  |
| 0.098  |
| 0.218  |
| #NUM!  |
| #NUM!  |
| 0.610  |
| -0.733 |
| 0.706  |
| 0.818  |
| -0.452 |
| -0.333 |
| #NUM!  |
| 0.366  |
| #NUM!  |
| 1.784  |

|        |
|--------|
| -0.476 |
| 0.638  |
| 0.698  |
| #NUM!  |
| 0.186  |
| -0.250 |
| 0.204  |
| 0.281  |
| #NUM!  |
| 0.163  |
| 0.105  |
| 0.200  |
| 0.360  |
| -0.035 |
| 0.931  |
| 0.607  |
| 0.725  |
| 0.330  |
| 0.388  |
| 0.026  |
| 0.252  |
| #NUM!  |
| -0.202 |
| 0.028  |
| -0.002 |
| 0.370  |
| 0.440  |
| 0.363  |
| 0.079  |
| 0.092  |
| 0.364  |
| 0.411  |
| -0.574 |
| #NUM!  |
| -0.328 |
| #NUM!  |
| #NUM!  |
| 0.394  |
| 0.132  |
| #NUM!  |
| 1.035  |
| 0.349  |
| 0.275  |
| 0.101  |
| 0.045  |
| 0.145  |
| 0.036  |
| #NUM!  |
| 0.336  |
| 0.290  |
| 0.137  |

|        |
|--------|
| 2.265  |
| 0.123  |
| #NUM!  |
| -0.987 |
| 1.011  |
| 0.324  |
| -0.030 |
| -0.836 |
| #NUM!  |
| -0.233 |
| -0.026 |
| -0.365 |
| 0.185  |
| 0.607  |
| -0.828 |
| 0.018  |
| 0.293  |
| -0.371 |
| 0.305  |
| #NUM!  |
| -0.345 |
| 0.013  |
| 0.232  |
| 0.308  |
| #NUM!  |
| #NUM!  |
| #NUM!  |
| 0.047  |
| 0.401  |
| -0.700 |
| -0.620 |
| 0.656  |
| 0.077  |
| 0.169  |
| 0.250  |
| 0.517  |
| 0.319  |
| -1.300 |
| 0.151  |
| 0.695  |
| 0.121  |
| 0.534  |
| 0.062  |
| 0.356  |
| 0.916  |
| #NUM!  |
| 0.028  |
| 0.654  |
| 0.293  |
| 0.582  |
| 0.401  |

|        |
|--------|
| 0.940  |
| -0.246 |
| 0.053  |
| -0.307 |
| 0.482  |
| 0.376  |
| 0.484  |
| 0.437  |
| -0.034 |
| -0.452 |
| #NUM!  |
| 0.659  |
| 0.424  |
| 0.404  |
| 0.422  |
| 0.096  |
| 0.186  |
| -0.509 |
| 0.365  |
| 0.057  |
| 0.708  |
| 0.791  |
| 0.881  |
| 1.360  |
| 0.288  |
| 0.453  |
| 0.622  |
| -0.469 |
| #NUM!  |
| 0.339  |
| -0.069 |
| 0.430  |
| -0.478 |
| -0.049 |
| -0.665 |
| 0.541  |
| 0.546  |
| 1.313  |
| 0.487  |
| #NUM!  |
| 0.146  |
| -0.404 |
| 0.980  |
| -0.567 |
| #NUM!  |
| -0.689 |
| -0.253 |
| #NUM!  |
| -0.201 |
| -0.950 |
| 0.093  |

|        |
|--------|
| 0.152  |
| -0.915 |
| 0.318  |
| 0.952  |
| -0.420 |
| -0.338 |
| 0.146  |
| -0.526 |
| 1.078  |
| 0.733  |
| 0.431  |
| 0.574  |
| -0.622 |
| 0.074  |
| 1.336  |
| #NUM!  |
| -0.044 |
| -0.506 |
| -0.085 |
| 0.387  |
| #NUM!  |
| -0.540 |
| -0.123 |
| 0.072  |
| #NUM!  |
| #NUM!  |
| -0.143 |
| -0.407 |
| 0.580  |
| #NUM!  |
| 0.205  |
| 0.507  |
| 0.575  |
| 0.671  |
| -0.002 |
| 0.523  |
| 0.456  |
| -0.150 |
| 0.136  |
| 0.357  |
| 0.132  |
| 0.339  |
| #NUM!  |
| 0.613  |
| 0.066  |
| #NUM!  |
| -0.148 |
| 0.832  |
| -0.066 |
| -0.179 |
| 0.296  |

|        |
|--------|
| 0.026  |
| 0.311  |
| 0.654  |
| 0.126  |
| 0.204  |
| -0.255 |
| -0.277 |
| 0.713  |
| 0.353  |
| 1.759  |
| 0.577  |
| 0.409  |
| 0.004  |
| -0.354 |
| -0.340 |
| -0.063 |
| -0.108 |
| 0.351  |
| -0.130 |
| #NUM!  |
| 0.003  |
| -0.051 |
| #NUM!  |
| -1.140 |
| 1.151  |
| -0.059 |
| #NUM!  |
| 0.337  |
| -0.024 |
| 0.457  |
| -0.137 |
| 1.036  |
| 0.336  |
| -0.590 |
| -0.762 |
| 0.657  |
| 0.542  |
| 0.312  |
| 0.471  |
| -0.226 |
| 0.147  |
| -0.869 |
| -0.130 |
| 0.359  |
| 0.094  |
| -0.080 |
| -0.133 |
| 0.405  |
| 0.848  |
| -1.968 |
| -0.559 |

|        |
|--------|
| 1.545  |
| #NUM!  |
| #NUM!  |
| -0.224 |
| 0.000  |
| -1.270 |
| 0.012  |
| 0.293  |
| #NUM!  |
| #NUM!  |
| #NUM!  |
| 0.044  |
| 0.340  |
| 0.231  |
| 0.141  |
| 0.439  |
| 1.183  |
| 0.325  |
| 0.363  |
| #NUM!  |
| -0.261 |
| 0.493  |
| -1.099 |
| #NUM!  |
| #NUM!  |
| 0.029  |
| -0.345 |
| -0.494 |
| #NUM!  |
| #NUM!  |
| 0.114  |
| -0.104 |
| 0.516  |
| 0.328  |
| -1.469 |
| 1.213  |
| -0.211 |
| 0.496  |
| 0.961  |
| 0.106  |
| -0.897 |
| #NUM!  |
| 0.220  |
| 1.622  |
| #NUM!  |
| 0.123  |
| 0.183  |
| 0.393  |
| 0.364  |
| 0.715  |
| 0.379  |



|        |
|--------|
| -0.238 |
| 0.379  |
| -0.127 |
| -0.081 |
| 0.578  |
| 1.878  |
| 0.183  |
| 0.143  |
| -0.049 |
| -0.232 |
| 0.188  |
| 0.042  |
| 0.237  |
| -0.314 |
| -0.825 |
| 0.984  |
| -0.561 |
| 0.331  |
| 0.653  |
| 0.629  |
| 0.389  |
| 0.735  |
| 1.053  |
| 0.772  |
| 0.339  |
| 0.216  |
| 0.273  |
| 0.469  |
| 0.739  |
| 0.689  |
| 0.843  |
| 0.737  |
| 0.275  |
| 0.664  |
| #NUM!  |
| 0.258  |
| 0.257  |
| 0.109  |
| -0.157 |
| #NUM!  |
| -0.068 |
| 0.479  |
| -0.471 |
| -0.574 |
| 0.446  |
| 0.392  |
| -0.158 |
| 0.398  |
| #NUM!  |
| #NUM!  |
| 0.234  |

|        |
|--------|
| #NUM!  |
| 1.196  |
| -0.065 |
| -0.973 |
| -0.247 |
| 0.445  |
| 0.624  |
| 0.208  |
| 0.256  |
| -1.137 |
| -0.405 |
| -0.066 |
| 0.980  |
| -0.957 |
| -0.478 |
| -0.285 |
| #NUM!  |
| -0.324 |
| #NUM!  |
| 0.268  |
| 1.005  |
| 0.083  |
| 0.248  |
| 0.227  |
| -0.320 |
| 0.478  |
| #NUM!  |
| -0.269 |
| 0.139  |
| -0.559 |
| 0.390  |
| -0.240 |
| 0.331  |
| 0.808  |
| 0.582  |
| -0.254 |
| -0.407 |
| -0.127 |
| #NUM!  |
| #NUM!  |
| #NUM!  |
| 0.153  |
| 0.354  |
| 0.199  |
| 0.520  |
| -0.054 |
| 0.054  |
| 0.600  |
| -0.759 |
| 0.179  |
| -0.089 |

|        |
|--------|
| -1.014 |
| 0.620  |
| 0.545  |
| #NUM!  |
| 2.972  |
| 2.747  |
| 0.867  |
| 0.704  |
| -0.747 |
| 0.276  |
| #NUM!  |
| -1.405 |
| -0.091 |
| -0.261 |
| 0.904  |
| -0.402 |
| 0.787  |
| #NUM!  |
| 0.301  |
| #NUM!  |
| -0.912 |
| -0.178 |
| 0.135  |
| -0.198 |
| -0.210 |
| -0.091 |
| 0.379  |
| #NUM!  |
| 0.150  |
| -0.292 |
| 1.771  |
| 0.178  |
| 0.383  |
| 0.531  |
| -0.135 |
| 0.569  |
| 0.168  |
| 0.036  |
| -0.159 |
| 1.194  |
| 1.886  |
| -0.855 |
| -0.669 |
| -0.677 |
| 0.230  |
| #NUM!  |
| 0.458  |
| -0.068 |
| #NUM!  |
| -0.038 |
| 0.199  |

|        |
|--------|
| 0.009  |
| #NUM!  |
| 0.193  |
| -0.026 |
| 0.822  |
| 0.490  |
| -1.276 |
| -1.238 |
| -0.787 |
| 0.001  |
| -0.097 |
| 0.592  |
| 0.613  |
| -1.117 |
| -0.630 |
| -0.041 |
| 1.238  |
| 0.287  |
| 0.049  |
| 0.679  |
| 0.277  |
| 0.575  |
| 0.664  |
| 0.014  |
| 0.325  |
| 0.960  |
| 0.650  |
| -1.095 |
| #NUM!  |
| 0.924  |
| 0.725  |
| -0.189 |
| 0.720  |
| -0.079 |
| 0.450  |
| 0.141  |
| 0.332  |
| #NUM!  |
| 0.038  |
| 0.203  |
| #NUM!  |
| -0.531 |
| #NUM!  |
| #NUM!  |
| #NUM!  |
| 0.170  |
| 0.060  |
| -0.052 |
| 0.235  |
| 0.232  |
| -0.806 |

|        |
|--------|
| 0.638  |
| 0.038  |
| -0.056 |
| 0.560  |
| -0.131 |
| 0.244  |
| #NUM!  |
| 0.472  |
| #NUM!  |
| #NUM!  |
| 0.054  |
| 0.153  |
| -0.011 |
| 0.405  |
| 0.305  |
| 1.039  |
| 0.616  |
| -0.303 |
| #NUM!  |
| 0.292  |
| -0.517 |
| -0.076 |
| -0.067 |
| -0.857 |
| 0.756  |
| -0.279 |
| #NUM!  |
| 0.012  |
| 0.137  |
| 0.441  |
| 2.700  |
| 0.705  |
| -0.139 |
| 0.290  |
| 0.197  |
| #NUM!  |
| -0.413 |
| 0.161  |
| 0.251  |
| 0.426  |
| -0.667 |
| #NUM!  |
| -0.178 |
| #NUM!  |
| 1.060  |
| -0.192 |
| -0.070 |
| 0.206  |
| 0.468  |
| 0.415  |
| 0.227  |

|        |
|--------|
| 1.216  |
| -0.439 |
| 0.392  |
| -0.157 |
| #NUM!  |
| 0.756  |
| -0.220 |
| -0.481 |
| #NUM!  |
| -0.126 |
| -1.082 |
| 0.246  |
| -0.161 |
| -1.195 |
| 1.607  |
| 0.098  |
| -0.025 |
| -0.021 |
| 0.137  |
| #NUM!  |
| -1.009 |
| -2.019 |
| 0.261  |
| -0.225 |
| 0.433  |
| -0.520 |
| -0.032 |
| 0.175  |
| 1.053  |
| -0.578 |
| 0.354  |
| -0.275 |
| -0.057 |
| -0.066 |
| 0.372  |
| 0.345  |
| 0.353  |
| -0.156 |
| 0.301  |
| -0.080 |
| -0.017 |
| 0.209  |
| 0.032  |
| 0.198  |
| 0.088  |
| -0.116 |
| 1.107  |
| #NUM!  |
| -0.279 |
| 0.358  |
| 0.323  |

|        |
|--------|
| -0.021 |
| 0.418  |
| 0.612  |
| 0.349  |
| 0.372  |
| 0.205  |
| 0.442  |
| -0.540 |
| -0.760 |
| 0.286  |
| 0.119  |
| #NUM!  |
| 0.489  |
| -0.345 |
| 0.599  |
| -1.124 |
| #NUM!  |
| 0.013  |
| #NUM!  |
| -0.179 |
| 0.436  |
| -0.350 |
| #NUM!  |
| #NUM!  |
| 0.702  |
| -0.006 |
| -0.165 |
| 0.428  |
| 0.629  |
| -0.104 |
| 0.603  |
| 0.099  |
| 1.032  |
| #NUM!  |
| 0.241  |
| 0.897  |
| 0.215  |
| 0.541  |
| #NUM!  |
| #NUM!  |
| -0.438 |
| 1.881  |
| 0.313  |
| -0.098 |
| 0.316  |
| 0.248  |
| -0.310 |
| 0.407  |
| 0.390  |
| -0.030 |
| 1.705  |

|        |
|--------|
| 0.414  |
| 0.071  |
| 0.532  |
| 0.856  |
| 1.615  |
| 0.156  |
| 0.407  |
| -0.246 |
| 0.942  |
| 0.868  |
| 0.474  |
| 0.422  |
| 0.176  |
| -0.091 |
| -0.194 |
| -0.122 |
| #NUM!  |
| #NUM!  |
| -0.530 |
| #NUM!  |
| #NUM!  |
| #NUM!  |
| 0.008  |
| #NUM!  |
| -0.232 |
| #NUM!  |
| -0.795 |
| -1.162 |
| 0.161  |
| -0.323 |
| -0.007 |
| 0.173  |
| 0.298  |
| 0.331  |
| -0.646 |
| -0.050 |
| 0.224  |
| -0.889 |
| 0.742  |
| -0.445 |
| 0.250  |
| 0.739  |
| #NUM!  |
| 0.387  |
| 0.465  |
| -0.540 |
| 0.512  |
| 0.706  |
| -0.220 |
| -0.346 |
| 0.306  |



|        |
|--------|
| 0.311  |
| 0.462  |
| -0.073 |
| 0.333  |
| #NUM!  |
| -0.054 |
| 0.342  |
| -0.445 |
| #NUM!  |
| -1.423 |
| #NUM!  |
| 0.133  |
| -0.011 |
| -0.288 |
| 0.554  |
| 0.106  |
| 0.290  |
| 0.119  |
| 0.021  |
| 1.428  |
| -1.504 |
| -1.286 |
| 1.185  |
| 0.008  |
| 0.672  |
| -0.173 |
| 1.082  |
| 0.045  |
| -0.152 |
| -0.814 |
| -0.249 |
| #NUM!  |
| #NUM!  |
| #NUM!  |
| #NUM!  |
| 0.582  |
| 0.594  |
| 0.050  |
| -1.337 |
| -0.746 |
| -0.164 |
| 0.285  |
| -0.311 |
| #NUM!  |
| -0.244 |
| -0.504 |
| 0.371  |
| 0.467  |
| -0.221 |
| -2.021 |
| #NUM!  |

|        |
|--------|
| 0.075  |
| 0.703  |
| 2.528  |
| 0.194  |
| #NUM!  |
| -0.361 |
| -1.224 |
| #NUM!  |
| -0.396 |
| #NUM!  |
| 0.284  |
| 0.195  |
| -0.884 |
| 0.974  |
| -0.520 |
| -0.602 |
| 0.765  |
| 0.870  |
| 0.925  |
| -0.102 |
| 0.241  |
| #NUM!  |
| 0.341  |
| 0.837  |
| 0.078  |
| 0.911  |
| -0.168 |
| -0.353 |
| 0.220  |
| 0.432  |
| 1.368  |
| 0.606  |
| 4.653  |
| 0.131  |
| -0.036 |
| -0.787 |
| -0.504 |
| 0.563  |
| 0.764  |
| -0.382 |
| 0.252  |
| 0.035  |
| -0.637 |
| 0.234  |
| 0.205  |
| 0.671  |
| -0.007 |
| -0.479 |
| -0.502 |
| 0.323  |
| 0.196  |

|        |
|--------|
| #NUM!  |
| 0.290  |
| #NUM!  |
| -1.246 |
| -0.334 |
| 0.373  |
| 0.676  |
| 0.501  |
| #NUM!  |
| -1.962 |
| -0.155 |
| -0.038 |
| 0.212  |
| #NUM!  |
| -0.077 |
| -0.285 |
| -1.729 |
| 2.177  |
| -0.274 |
| 0.427  |
| 1.520  |
| 0.909  |
| 0.435  |
| 0.098  |
| #NUM!  |
| 0.776  |
| -0.998 |
| -0.216 |
| 0.774  |
| -0.354 |
| 0.067  |
| 0.369  |
| 1.038  |
| 0.435  |
| 0.793  |
| 0.925  |
| 0.504  |
| 0.408  |
| -1.567 |
| 0.251  |
| 0.717  |
| 0.379  |
| 0.707  |
| 0.722  |
| 0.683  |
| 0.823  |
| 0.035  |
| 0.467  |
| 0.306  |
| 1.257  |
| 0.714  |

|        |
|--------|
| -0.163 |
| 0.294  |
| 0.324  |
| 0.379  |
| 0.323  |
| 0.090  |
| #NUM!  |
| -0.078 |
| #NUM!  |
| 0.437  |
| 0.268  |
| -0.946 |
| 0.931  |
| 0.213  |
| 0.362  |
| -0.247 |
| #NUM!  |
| 1.147  |
| 0.003  |
| -0.625 |
| #NUM!  |
| 0.146  |
| -0.012 |
| 0.064  |
| -0.781 |
| -1.674 |
| -0.198 |
| -0.115 |
| 0.165  |
| #NUM!  |
| -2.135 |
| 0.253  |
| 0.922  |
| 0.162  |
| -0.008 |
| 0.679  |
| 0.114  |
| #NUM!  |
| 0.065  |
| #NUM!  |
| -0.384 |
| 0.342  |
| -1.001 |
| -0.894 |
| -0.781 |
| 0.723  |
| 0.610  |
| -0.387 |
| -0.105 |
| 0.061  |
| 0.456  |

|        |
|--------|
| -0.430 |
| -0.129 |
| -0.463 |
| 0.003  |
| 0.373  |
| #NUM!  |
| 0.303  |
| -0.106 |
| -1.150 |
| -0.755 |
| #NUM!  |
| -0.050 |
| 0.438  |
| 0.524  |
| 0.440  |
| 0.821  |
| 0.541  |
| 0.393  |
| 0.271  |
| 0.270  |
| 0.707  |
| 0.334  |
| 0.615  |
| 0.252  |
| 0.586  |
| 0.551  |
| 0.846  |
| -0.040 |
| 0.398  |
| 0.756  |
| 0.810  |
| #NUM!  |
| 0.482  |
| -0.263 |
| 0.370  |
| -0.092 |
| 0.746  |
| -1.868 |
| 1.152  |
| 2.373  |
| 0.317  |
| #NUM!  |
| #NUM!  |
| -0.343 |
| -0.650 |
| #NUM!  |
| 0.344  |
| -0.166 |
| 0.316  |
| #NUM!  |
| -1.535 |

|        |
|--------|
| -1.795 |
| #NUM!  |
| 0.109  |
| #NUM!  |
| 0.180  |
| -0.374 |
| -1.825 |
| #NUM!  |
| 0.004  |
| 0.319  |
| #NUM!  |
| -0.239 |
| 0.958  |
| -0.022 |
| 0.263  |
| -0.410 |
| 0.310  |
| -0.357 |
| -0.383 |
| 0.207  |
| -0.140 |
| -2.346 |
| #NUM!  |
| -0.662 |
| #NUM!  |
| -0.014 |
| 0.122  |
| #NUM!  |
| #NUM!  |
| -0.309 |
| -0.152 |
| 0.597  |
| #NUM!  |
| 0.524  |
| #NUM!  |
| 0.275  |
| -0.210 |
| 0.451  |
| 0.319  |
| 0.442  |
| -0.635 |
| 1.001  |
| -0.510 |
| -3.364 |
| -0.382 |
| 0.217  |
| 0.585  |
| #NUM!  |
| 0.052  |
| 0.558  |
| 0.129  |

|        |
|--------|
| 0.155  |
| -0.394 |
| 0.210  |
| -0.243 |
| #NUM!  |
| 0.556  |
| -0.490 |
| -1.051 |
| -1.041 |
| -0.162 |
| 2.179  |
| 0.495  |
| 0.163  |
| -0.345 |
| 0.239  |
| 0.299  |
| -0.841 |
| -0.606 |
| #NUM!  |
| 2.621  |
| #NUM!  |
| -0.039 |
| -0.449 |
| #NUM!  |
| -0.202 |
| -0.122 |
| -0.016 |
| 0.199  |
| 0.275  |
| 1.740  |
| 1.068  |
| 0.260  |
| 1.825  |
| 0.154  |
| 0.689  |
| -0.608 |
| 0.643  |
| #NUM!  |
| -1.020 |
| -1.145 |
| -0.280 |
| 0.148  |
| -0.090 |
| 0.265  |
| 0.546  |
| -0.004 |
| -0.082 |
| 0.165  |
| 1.469  |
| #NUM!  |
| -0.301 |

|        |
|--------|
| #NUM!  |
| -0.264 |
| 0.986  |
| #NUM!  |
| -0.096 |
| 0.178  |
| 0.107  |
| -0.349 |
| -0.039 |
| 0.716  |
| 0.018  |
| 0.256  |
| 0.286  |
| -1.649 |
| 0.148  |
| 0.567  |
| -1.322 |
| 1.037  |
| -0.703 |
| 0.911  |
| 0.171  |
| 0.048  |
| 0.223  |
| -0.891 |
| 0.876  |
| 0.514  |
| 0.053  |
| #NUM!  |
| 0.280  |
| -0.657 |
| #NUM!  |
| 0.746  |
| 0.883  |
| -0.415 |
| #NUM!  |
| 0.250  |
| 0.040  |
| 0.950  |
| 0.045  |
| -0.123 |
| 0.192  |
| 0.776  |
| 0.409  |
| 0.186  |
| 0.228  |
| 0.139  |
| #NUM!  |
| -1.345 |
| -0.002 |
| -0.097 |
| 0.664  |



|        |
|--------|
| 0.335  |
| 0.316  |
| 0.488  |
| 0.006  |
| #NUM!  |
| 0.146  |
| 1.881  |
| #NUM!  |
| 1.907  |
| 0.282  |
| -0.386 |
| -0.179 |
| 0.072  |
| #NUM!  |
| -0.184 |
| 0.241  |
| 0.011  |
| 0.594  |
| -1.293 |
| 0.277  |
| 0.131  |
| -0.259 |
| -0.774 |
| 0.498  |
| 0.218  |
| 0.454  |
| 0.096  |
| -0.814 |
| 0.530  |
| #NUM!  |
| -0.641 |
| -0.098 |
| 0.187  |
| -0.334 |
| -0.560 |
| 0.464  |
| -0.370 |
| 0.351  |
| 0.222  |
| -0.852 |
| 1.619  |
| 0.605  |
| #NUM!  |
| -1.545 |
| 0.029  |
| 0.159  |
| 0.064  |
| 0.565  |
| 0.413  |
| 0.257  |
| 0.427  |

|        |
|--------|
| -0.120 |
| 1.137  |
| 0.452  |
| 0.426  |
| 0.448  |
| 0.520  |
| 0.209  |
| 0.401  |
| 0.595  |
| 0.510  |
| 0.323  |
| 0.828  |
| -0.160 |
| 1.263  |
| 0.263  |
| 0.257  |
| #NUM!  |
| 0.274  |
| 0.372  |
| #NUM!  |
| #NUM!  |
| 0.501  |
| -0.191 |
| #NUM!  |
| -1.220 |
| #NUM!  |
| -0.164 |
| -3.090 |
| -0.872 |
| 0.140  |
| -1.846 |
| #NUM!  |
| #NUM!  |
| 0.650  |
| 0.250  |
| 0.598  |
| 0.477  |
| -0.266 |
| -0.282 |
| #NUM!  |
| 0.476  |
| 0.410  |
| -0.296 |
| -0.097 |
| 0.313  |
| 0.017  |
| 0.333  |
| 0.381  |
| 2.787  |
| 0.760  |
| -0.394 |

|        |
|--------|
| 0.301  |
| 0.199  |
| -0.389 |
| 0.283  |
| -0.246 |
| 0.155  |
| 1.091  |
| 0.435  |
| 2.485  |
| 0.220  |
| 0.320  |
| 0.922  |
| 0.336  |
| #NUM!  |
| 0.869  |
| 0.528  |
| #NUM!  |
| 0.641  |
| 0.173  |
| 0.556  |
| 1.201  |
| 0.231  |
| 0.201  |
| 0.159  |
| 0.314  |
| 0.056  |
| 0.095  |
| 0.228  |
| -0.347 |
| -0.226 |
| -0.404 |
| 0.519  |
| 0.486  |
| 0.120  |
| 0.103  |
| #NUM!  |
| 0.181  |
| 0.097  |
| 0.244  |
| 0.715  |
| 0.659  |
| 0.320  |
| 0.287  |
| 0.125  |
| 0.572  |
| 0.407  |
| 0.082  |
| -0.073 |
| 0.984  |
| 0.060  |
| #NUM!  |

|        |
|--------|
| 1.855  |
| #NUM!  |
| 0.310  |
| 0.408  |
| -0.209 |
| 0.480  |
| 0.476  |
| -1.929 |
| 0.345  |
| #NUM!  |
| 0.282  |
| 0.019  |
| -0.288 |
| 0.929  |
| -0.024 |
| 0.325  |
| 0.213  |
| 0.158  |
| -0.414 |
| -0.961 |
| 0.718  |
| 0.137  |
| -0.283 |
| 0.025  |
| -0.824 |
| 0.299  |
| 0.393  |
| 0.515  |
| 0.351  |
| 0.187  |
| 0.322  |
| 0.092  |
| 0.209  |
| 0.178  |
| 0.621  |
| 0.152  |
| 1.122  |
| 0.994  |
| -0.015 |
| 0.907  |
| 0.894  |
| -0.385 |
| 1.944  |
| 0.420  |
| 0.461  |
| -0.147 |
| 0.500  |
| 4.112  |
| -0.891 |
| -0.628 |
| 0.516  |

|        |
|--------|
| 0.342  |
| 0.657  |
| -1.642 |
| 0.380  |
| 0.082  |
| 0.523  |
| 0.340  |
| 3.072  |
| 0.125  |
| 0.298  |
| 0.300  |
| 0.012  |
| -0.505 |
| 0.222  |
| -0.141 |
| 0.610  |
| -0.263 |
| 0.332  |
| -0.196 |
| -0.326 |
| #NUM!  |
| -0.022 |
| 0.363  |
| -0.193 |
| -0.031 |
| #NUM!  |
| -0.735 |
| 2.203  |
| 0.476  |
| 0.386  |
| 0.124  |
| -0.174 |
| -0.387 |
| 0.006  |
| -0.089 |
| 0.118  |
| 0.547  |
| 0.721  |
| -0.130 |
| 1.347  |
| 2.040  |
| -0.510 |
| -0.360 |
| 0.329  |
| 0.213  |
| 0.290  |
| -0.366 |
| 0.028  |
| 0.423  |
| -0.542 |
| 0.277  |
| 0.161  |

|        |
|--------|
| 0.191  |
| 0.028  |
| 0.680  |
| 0.133  |
| 0.063  |
| -0.070 |
| 0.331  |
| 0.053  |
| -0.983 |
| 0.734  |
| 0.358  |
| 0.407  |
| 0.828  |
| 0.299  |
| -0.014 |
| 0.068  |
| 0.234  |
| 0.650  |
| 0.002  |
| -0.298 |
| -0.023 |
| 0.178  |
| 1.746  |
| 0.353  |
| 0.204  |
| -0.081 |
| -0.027 |
| -0.150 |
| 0.612  |
| -0.178 |
| 0.546  |
| 2.609  |
| 0.587  |
| -0.062 |
| 0.103  |
| 0.052  |
| -0.881 |
| 0.753  |
| -0.452 |
| -0.430 |
| 1.215  |
| 0.879  |
| -1.058 |
| 0.215  |
| 2.118  |
| 0.027  |
| 0.531  |
| -0.006 |
| 0.308  |
| 0.180  |
| #NUM!  |

|        |
|--------|
| 4.044  |
| 0.469  |
| 0.247  |
| 0.400  |
| 0.842  |
| 0.096  |
| 0.350  |
| 0.405  |
| 0.263  |
| 0.200  |
| 0.283  |
| 0.426  |
| -0.119 |
| 0.319  |
| 0.762  |
| 0.957  |
| 0.292  |
| 0.850  |
| 0.278  |
| -0.144 |
| -0.263 |
| 0.735  |
| -0.843 |
| 0.729  |
| 0.180  |
| 0.371  |
| 0.391  |
| 0.763  |
| 0.223  |
| 0.630  |
| 0.521  |
| 0.077  |
| 0.222  |
| 0.999  |
| 0.719  |
| -0.792 |
| -0.202 |
| -0.233 |
| 0.580  |
| #NUM!  |
| -0.379 |
| -0.240 |
| -0.241 |
| -0.270 |
| -1.321 |
| 0.465  |
| -0.081 |
| -1.123 |
| 0.167  |
| 0.687  |
| 0.530  |

|        |
|--------|
| 0.643  |
| -0.127 |
| -0.480 |
| 0.664  |
| -3.396 |
| 0.511  |
| 1.202  |
| 0.893  |
| 0.110  |
| -0.203 |
| 0.514  |
| -1.448 |
| #NUM!  |
| 2.575  |
| 2.533  |
| -0.388 |
| 0.629  |
| 0.082  |
| 0.076  |
| -0.983 |
| -0.983 |
| -0.462 |
| #NUM!  |
| 0.117  |
| -0.665 |
| -0.230 |
| -0.461 |
| #NUM!  |
| #NUM!  |
| -0.981 |
| 1.038  |
| #NUM!  |
| -2.136 |
| -0.725 |
| 0.599  |
| #NUM!  |
| -2.507 |
| 0.400  |
| 0.034  |
| 0.102  |
| -0.203 |
| 0.229  |
| #NUM!  |
| -0.491 |
| -2.480 |
| -0.640 |
| 0.346  |
| -0.157 |
| 0.134  |
| 0.392  |
| -0.084 |



|        |
|--------|
| -0.070 |
| 0.126  |
| -0.164 |
| 0.344  |
| -0.147 |
| 0.759  |
| -0.879 |
| #NUM!  |
| 2.904  |
| 0.346  |
| -0.048 |
| 0.275  |
| #NUM!  |
| 0.499  |
| -0.573 |
| 0.190  |
| 0.409  |
| #NUM!  |
| 0.554  |
| 0.121  |
| -0.867 |
| #NUM!  |
| -0.674 |
| #NUM!  |
| 0.574  |
| -0.189 |
| 0.467  |
| -0.127 |
| #NUM!  |
| 0.094  |
| #NUM!  |
| -0.542 |
| 0.563  |
| #NUM!  |
| 0.037  |
| -0.565 |
| 0.201  |
| 1.412  |
| 0.322  |
| 0.288  |
| -0.918 |
| 0.308  |
| #NUM!  |
| -0.007 |
| 0.048  |
| -0.214 |
| -0.266 |
| 0.841  |
| #NUM!  |
| 0.148  |
| 0.482  |

|        |
|--------|
| -0.667 |
| 0.601  |
| 0.178  |
| 0.145  |
| 0.913  |
| -0.008 |
| 0.102  |
| -0.308 |
| 0.568  |
| #NUM!  |
| #NUM!  |
| 1.332  |
| 0.509  |
| #NUM!  |
| 0.253  |
| 1.565  |
| 0.358  |
| 0.016  |
| 0.059  |
| #NUM!  |
| -0.639 |
| 0.121  |
| -0.277 |
| #NUM!  |
| #NUM!  |
| #NUM!  |
| -1.345 |
| #NUM!  |
| 0.146  |
| -0.212 |
| 0.575  |
| -0.604 |
| -0.337 |
| #NUM!  |
| 0.284  |
| -0.047 |
| 1.212  |
| 0.028  |
| 0.191  |
| -0.249 |
| 0.230  |
| 0.618  |
| -0.071 |
| 0.156  |
| 0.733  |
| #NUM!  |
| #NUM!  |
| 0.466  |
| 0.569  |
| 0.855  |
| #NUM!  |

|        |
|--------|
| -0.403 |
| -0.175 |
| 0.337  |
| 0.157  |
| 0.457  |
| 0.635  |
| 0.452  |
| 0.024  |
| 0.633  |
| 0.945  |
| 2.408  |
| 1.717  |
| 0.934  |
| 0.615  |
| 0.077  |
| 0.451  |
| -0.308 |
| 0.600  |
| -0.720 |
| 0.939  |
| 0.871  |
| 0.027  |
| 0.339  |
| -0.516 |
| -0.421 |
| -0.303 |
| 0.855  |
| 0.584  |
| 0.470  |
| -0.117 |
| #NUM!  |
| -0.641 |
| 0.330  |
| 0.249  |
| 0.003  |
| 0.015  |
| 0.154  |
| -0.353 |
| 0.266  |
| 0.416  |
| 0.446  |
| 0.167  |
| 0.115  |
| 0.452  |
| -0.149 |
| 1.104  |
| 0.496  |
| -0.082 |
| 0.792  |
| 0.489  |
| 0.081  |
| 0.236  |

|        |
|--------|
| 0.569  |
| -0.943 |
| -0.001 |
| 0.531  |
| -0.391 |
| 0.014  |
| 0.322  |
| 0.233  |
| 0.642  |
| 0.206  |
| 0.655  |
| 0.424  |
| 0.019  |
| 0.528  |
| -0.040 |
| 0.467  |
| -0.185 |
| #NUM!  |
| 0.794  |
| 0.421  |
| 0.168  |
| #NUM!  |
| -0.125 |
| -0.325 |
| 0.850  |
| 0.013  |
| 0.434  |
| 0.125  |
| #NUM!  |
| -0.408 |
| 0.024  |
| 0.120  |
| -0.695 |
| -0.094 |
| 0.540  |
| -0.273 |
| 0.733  |
| -0.208 |
| 0.352  |
| -0.065 |
| -0.078 |
| -0.271 |
| -0.848 |
| 0.815  |
| -0.589 |
| 0.375  |
| 0.277  |
| 3.041  |
| 0.490  |
| 1.736  |
| 0.217  |
| 0.215  |

|        |
|--------|
| 0.084  |
| 0.353  |
| 0.708  |
| 1.426  |
| -0.636 |
| 0.457  |
| #NUM!  |
| 0.570  |
| 1.550  |
| 0.297  |
| 0.388  |
| 0.263  |
| -0.762 |
| 0.258  |
| 0.067  |
| #NUM!  |
| 0.220  |
| 0.437  |
| #NUM!  |
| #NUM!  |
| -1.499 |
| 1.015  |
| 0.231  |
| #NUM!  |
| 0.425  |
| #NUM!  |
| -0.513 |
| 0.091  |
| 0.116  |
| 0.626  |
| 0.214  |
| 0.266  |
| 0.409  |
| 0.546  |
| -0.336 |
| 0.162  |
| 0.727  |
| 0.103  |
| -0.557 |
| 1.618  |
| -0.170 |
| 0.198  |
| 1.328  |
| 0.741  |
| -0.224 |
| -0.181 |
| 0.062  |
| 0.725  |
| #NUM!  |
| #NUM!  |
| -2.309 |

|        |
|--------|
| -0.347 |
| #NUM!  |
| #NUM!  |
| 0.410  |
| #NUM!  |
| -1.680 |
| -0.232 |
| #NUM!  |
| #NUM!  |
| 1.282  |
| -0.431 |
| -0.227 |
| -0.064 |
| -0.106 |
| -0.343 |
| 0.288  |
| #NUM!  |
| 0.741  |
| 0.017  |
| 0.167  |
| 0.445  |
| 0.138  |
| 0.187  |
| -0.401 |
| 0.556  |
| -0.267 |
| -0.096 |
| 0.278  |
| 0.930  |
| -0.345 |
| 0.001  |
| 0.334  |
| 0.133  |
| 0.459  |
| -0.029 |
| -0.845 |
| #NUM!  |
| 0.440  |
| -0.298 |
| 0.505  |
| #NUM!  |
| 0.121  |
| 0.178  |
| 0.649  |
| 1.092  |
| 0.604  |
| 0.268  |
| 1.007  |
| 1.146  |
| 0.888  |
| 0.321  |

|        |
|--------|
| -1.851 |
| #NUM!  |
| 0.434  |
| 0.196  |
| 0.152  |
| -0.988 |
| -0.364 |
| -0.848 |
| 0.261  |
| #NUM!  |
| 0.085  |
| 0.194  |
| 0.149  |
| 0.418  |
| 0.264  |
| 0.026  |
| -0.663 |
| 0.105  |
| #NUM!  |
| 0.053  |
| 1.102  |
| #NUM!  |
| 2.417  |
| -0.189 |
| -0.579 |
| 0.555  |
| -0.026 |
| 1.043  |
| 0.119  |
| -0.073 |
| -0.344 |
| 0.002  |
| -0.067 |
| 0.401  |
| 0.058  |
| 2.602  |
| 0.085  |
| 0.307  |
| -0.032 |
| -0.724 |
| 0.430  |
| 0.211  |
| #NUM!  |
| 0.032  |
| 0.705  |
| -1.433 |
| 0.304  |
| 0.125  |
| 0.188  |
| 0.506  |
| 0.140  |

|        |
|--------|
| #NUM!  |
| -0.119 |
| 0.001  |
| 0.607  |
| -0.340 |
| 0.298  |
| 0.084  |
| 0.028  |
| -0.490 |
| 1.019  |
| -0.282 |
| 0.582  |
| -0.135 |
| -0.094 |
| 0.118  |
| -0.236 |
| 0.177  |
| -0.044 |
| #NUM!  |
| 0.524  |
| -0.105 |
| 0.098  |
| -0.406 |
| 0.533  |
| #NUM!  |
| -0.732 |
| -0.570 |
| 0.034  |
| 0.822  |
| -0.161 |
| #NUM!  |
| 0.197  |
| -0.301 |
| 0.860  |
| 0.136  |
| -0.599 |
| -0.599 |
| -0.408 |
| 0.023  |
| 0.101  |
| 0.167  |
| 0.311  |
| 0.455  |
| 0.194  |
| -0.155 |
| 0.037  |
| 0.103  |
| 0.194  |
| 0.588  |
| 0.529  |
| 0.035  |



|        |
|--------|
| 0.327  |
| 0.688  |
| 0.425  |
| 0.348  |
| -0.089 |
| -0.371 |
| #NUM!  |
| -0.494 |
| -0.249 |
| 0.220  |
| 0.484  |
| 0.124  |
| #NUM!  |
| 0.215  |
| 0.451  |
| 0.436  |
| 0.305  |
| 1.478  |
| 0.056  |
| 0.297  |
| 2.124  |
| 0.172  |
| -0.010 |
| -0.580 |
| -0.014 |
| -0.727 |
| -0.158 |
| -0.451 |
| #NUM!  |
| 0.619  |
| -0.059 |
| 0.067  |
| -0.161 |
| #NUM!  |
| 0.085  |
| 0.856  |
| -0.731 |
| -0.947 |
| -0.351 |
| 0.766  |
| -0.522 |
| -0.088 |
| 0.256  |
| 0.049  |
| 0.272  |
| 0.026  |
| 0.577  |
| -0.154 |
| 0.526  |
| -0.648 |
| 0.436  |

|        |
|--------|
| -0.172 |
| -0.263 |
| 0.287  |
| -0.030 |
| 0.289  |
| 0.688  |
| #NUM!  |
| -0.666 |
| 0.660  |
| 0.138  |
| -1.046 |
| #NUM!  |
| -0.100 |
| 0.751  |
| #NUM!  |
| 0.430  |
| -1.009 |
| -1.729 |
| #NUM!  |
| 0.725  |
| -0.019 |
| 0.141  |
| 0.875  |
| 0.719  |
| 0.567  |
| 0.680  |
| #NUM!  |
| 0.780  |
| 0.269  |
| 0.189  |
| -0.432 |
| 0.768  |
| #NUM!  |
| 0.147  |
| 0.609  |
| 0.107  |
| 0.149  |
| -0.255 |
| 0.649  |
| -0.085 |
| -1.798 |
| #NUM!  |
| 0.384  |
| -0.180 |
| -0.529 |
| 0.167  |
| 0.198  |
| -0.081 |
| -0.287 |
| 0.266  |
| 0.318  |

|        |
|--------|
| 0.438  |
| 0.341  |
| -0.119 |
| 0.659  |
| 0.211  |
| 0.215  |
| 0.319  |
| 0.089  |
| 0.306  |
| -0.030 |
| 0.418  |
| 0.238  |
| 0.530  |
| 0.660  |
| 0.345  |
| -0.165 |
| -0.463 |
| 0.057  |
| -0.384 |
| #NUM!  |
| 0.541  |
| 0.551  |
| -4.262 |
| 0.278  |
| 0.202  |
| 0.410  |
| -1.561 |
| 0.403  |
| 0.422  |
| 0.952  |
| -0.203 |
| #NUM!  |
| 0.388  |
| 0.147  |
| 0.213  |
| 0.305  |
| 0.254  |
| 0.676  |
| -0.001 |
| -0.329 |
| -0.172 |
| -1.106 |
| 0.335  |
| 0.881  |
| -0.003 |
| 1.935  |
| 0.133  |
| -0.377 |
| #NUM!  |
| 0.628  |
| -0.435 |

|        |
|--------|
| -0.081 |
| #NUM!  |
| 2.314  |
| -0.036 |
| 4.263  |
| 0.233  |
| #NUM!  |
| 0.466  |
| 0.313  |
| -0.420 |
| 0.501  |
| 0.572  |
| 0.400  |
| 0.638  |
| #NUM!  |
| 0.280  |
| #NUM!  |
| 0.648  |
| 0.236  |
| #NUM!  |
| 0.163  |
| #NUM!  |
| #NUM!  |
| -1.771 |
| -0.393 |
| #NUM!  |
| -0.138 |
| -0.096 |
| -1.644 |
| -0.138 |
| -1.064 |
| 0.425  |
| 0.258  |
| #NUM!  |
| -2.133 |
| 0.264  |
| 0.625  |
| 0.481  |
| #NUM!  |
| -0.154 |
| 0.365  |
| 0.127  |
| 0.250  |
| 0.897  |
| 0.287  |
| 0.512  |
| 0.899  |
| 0.329  |
| 0.232  |
| -1.539 |
| -0.354 |

|        |
|--------|
| 0.148  |
| -0.953 |
| 0.390  |
| 0.037  |
| -0.046 |
| 0.051  |
| 0.738  |
| 0.200  |
| -0.817 |
| 0.413  |
| 0.402  |
| 0.238  |
| -0.409 |
| 0.503  |
| -0.022 |
| -0.007 |
| 0.499  |
| #NUM!  |
| 0.293  |
| -0.034 |
| #NUM!  |
| -0.251 |
| #NUM!  |
| -0.317 |
| 0.152  |
| 0.124  |
| 0.688  |
| 1.223  |
| 0.576  |
| 0.962  |
| 0.178  |
| 0.189  |
| 0.303  |
| -0.029 |
| 0.143  |
| 0.042  |
| #NUM!  |
| 3.182  |
| 0.371  |
| 0.890  |
| 0.495  |
| 0.445  |
| 0.764  |
| -0.316 |
| -1.338 |
| -0.082 |
| 0.639  |
| 0.870  |
| 0.090  |
| 0.566  |
| 0.014  |

|        |
|--------|
| 0.347  |
| -0.537 |
| 0.084  |
| 2.578  |
| 1.466  |
| -0.156 |
| -0.052 |
| 0.331  |
| 0.449  |
| 0.712  |
| 0.712  |
| 0.122  |
| 0.316  |
| -2.330 |
| 0.270  |
| 0.673  |
| 1.771  |
| -0.123 |
| 0.145  |
| 0.234  |
| -0.318 |
| -0.719 |
| -0.084 |
| 1.047  |
| #NUM!  |
| -0.100 |
| -0.841 |
| -1.265 |
| 0.596  |
| 0.523  |
| -0.155 |
| 1.220  |
| 0.274  |
| -0.132 |
| 0.169  |
| -0.074 |
| -0.128 |
| 0.389  |
| -1.362 |
| 0.238  |
| -0.067 |
| 0.073  |
| 0.068  |
| -0.369 |
| -2.916 |
| 0.540  |
| 1.924  |
| #NUM!  |
| 0.551  |
| 0.130  |
| -0.059 |

|        |
|--------|
| #NUM!  |
| -0.202 |
| 0.770  |
| 0.568  |
| 0.534  |
| 0.060  |
| 1.819  |
| 0.086  |
| -0.434 |
| -0.068 |
| #NUM!  |
| #NUM!  |
| -0.864 |
| 0.957  |
| 0.115  |
| 0.042  |
| 0.155  |
| 0.358  |
| -0.485 |
| 0.366  |
| 0.425  |
| 0.738  |
| -0.913 |
| #NUM!  |
| -0.184 |
| 0.669  |
| 0.892  |
| -0.056 |
| -0.579 |
| 0.494  |
| #NUM!  |
| 1.037  |
| -0.138 |
| 0.792  |
| 0.937  |
| 1.241  |
| -0.465 |
| 1.773  |
| 0.055  |
| #NUM!  |
| -1.143 |
| 1.644  |
| 0.542  |
| -0.388 |
| #NUM!  |
| 0.359  |
| -0.590 |
| #NUM!  |
| 0.418  |
| 0.701  |
| #NUM!  |

|        |
|--------|
| 0.848  |
| 2.221  |
| 2.490  |
| 0.614  |
| 0.317  |
| -0.271 |
| 1.154  |
| 1.301  |
| -0.805 |
| 0.907  |
| 0.303  |
| 0.636  |
| 0.500  |
| 0.193  |
| -0.093 |
| 0.996  |
| 0.067  |
| -0.315 |
| 0.184  |
| 0.019  |
| 0.715  |
| 0.183  |
| 0.108  |
| 0.124  |
| 0.317  |
| 0.474  |
| #NUM!  |
| -0.086 |
| -0.608 |
| 0.137  |
| #NUM!  |
| -0.039 |
| 0.146  |
| -0.618 |
| 1.160  |
| 0.396  |
| 0.168  |
| 0.438  |
| -0.274 |
| -0.766 |
| 0.253  |
| 0.477  |
| 0.316  |
| 0.500  |
| -0.251 |
| 0.401  |
| -3.233 |
| 0.096  |
| -0.429 |
| #NUM!  |
| 0.677  |



|        |
|--------|
| 0.759  |
| -0.821 |
| 0.021  |
| 0.365  |
| 0.373  |
| 1.140  |
| 0.122  |
| #NUM!  |
| #NUM!  |
| -0.040 |
| -0.116 |
| -0.372 |
| -0.133 |
| #NUM!  |
| -0.960 |
| 0.794  |
| -0.097 |
| 0.540  |
| 0.039  |
| 0.052  |
| 0.217  |
| 0.379  |
| 0.208  |
| -0.349 |
| 0.927  |
| -0.941 |
| #NUM!  |
| -0.749 |
| 1.144  |
| -0.343 |
| 0.322  |
| 0.480  |
| -0.536 |
| 0.189  |
| -0.170 |
| -0.341 |
| -0.062 |
| #NUM!  |
| 0.288  |
| 0.306  |
| -0.099 |
| 0.451  |
| 0.173  |
| -0.478 |
| -0.191 |
| #NUM!  |
| -0.319 |
| 0.280  |
| 0.361  |
| 0.164  |
| -0.129 |

|        |
|--------|
| -0.070 |
| -0.239 |
| 0.800  |
| 0.178  |
| 1.597  |
| -1.438 |
| -0.121 |
| -0.219 |
| 0.785  |
| 0.466  |
| 1.310  |
| -0.471 |
| -1.693 |
| #NUM!  |
| 0.777  |
| 0.909  |
| 0.035  |
| 0.641  |
| 0.142  |
| -0.150 |
| -0.489 |
| -0.484 |
| 1.119  |
| -0.373 |
| 1.595  |
| 0.402  |
| 0.101  |
| #NUM!  |
| 0.045  |
| 0.823  |
| -1.148 |
| -0.650 |
| #NUM!  |
| #NUM!  |
| #NUM!  |
| 0.396  |
| 0.263  |
| -0.350 |
| -0.156 |
| 0.222  |
| #NUM!  |
| -0.189 |
| -0.225 |
| 0.022  |
| -0.160 |
| -0.277 |
| -0.418 |
| 0.429  |
| 1.205  |
| -0.444 |
| 0.200  |

|        |
|--------|
| -0.345 |
| #NUM!  |
| -0.183 |
| #NUM!  |
| #NUM!  |
| 0.287  |
| -0.275 |
| 0.004  |
| 0.314  |
| 0.161  |
| -0.068 |
| #NUM!  |
| -0.263 |
| 0.217  |
| -0.906 |
| 0.038  |
| 0.030  |
| -0.378 |
| -0.013 |
| 0.180  |
| 0.166  |
| 0.628  |
| -0.998 |
| -0.594 |
| 0.564  |
| 0.002  |
| 0.216  |
| 0.596  |
| 0.275  |
| 0.206  |
| 2.203  |
| -2.242 |
| 0.420  |
| 0.343  |
| 0.253  |
| 0.391  |
| 0.253  |
| 0.573  |
| -0.255 |
| 0.517  |
| -0.428 |
| -1.948 |
| 0.116  |
| -0.673 |
| #NUM!  |
| 0.111  |
| -0.119 |
| #NUM!  |
| -0.041 |
| 0.985  |
| -0.030 |

|        |
|--------|
| -0.041 |
| -0.257 |
| -0.305 |
| 0.295  |
| 0.167  |
| #NUM!  |
| 1.050  |
| 0.624  |
| 0.542  |
| 0.162  |
| 0.305  |
| -0.142 |
| 0.254  |
| 0.274  |
| #NUM!  |
| -0.509 |
| -0.195 |
| -0.052 |
| -0.154 |
| 0.109  |
| -0.376 |
| -0.362 |
| -0.293 |
| 0.391  |
| -0.501 |
| -0.144 |
| 0.783  |
| -0.214 |
| 0.211  |
| -0.152 |
| -0.967 |
| 0.206  |
| 0.493  |
| 0.952  |
| -0.034 |
| #NUM!  |
| 0.088  |
| 0.133  |
| 0.306  |
| -0.177 |
| 0.045  |
| 0.477  |
| 0.025  |
| 0.295  |
| 0.383  |
| 0.335  |
| 0.517  |
| -0.658 |
| 0.067  |
| 0.474  |
| 0.264  |

|        |
|--------|
| -0.461 |
| -0.254 |
| 0.624  |
| -1.248 |
| 0.034  |
| #NUM!  |
| -0.686 |
| 0.387  |
| 0.328  |
| #NUM!  |
| -0.449 |
| #NUM!  |
| 0.625  |
| #NUM!  |
| #NUM!  |
| #NUM!  |
| #NUM!  |
| -1.098 |
| -1.004 |
| -2.582 |
| 0.128  |
| -1.058 |
| 0.248  |
| 0.226  |
| -1.070 |
| #NUM!  |
| 0.291  |
| -2.004 |
| #NUM!  |
| -0.270 |
| #NUM!  |
| #NUM!  |
| -0.175 |
| #NUM!  |
| -2.191 |
| -0.073 |
| 0.057  |
| #NUM!  |
| #NUM!  |
| 1.444  |
| #NUM!  |
| #NUM!  |
| -1.014 |
| -0.583 |
| 0.569  |
| #NUM!  |

|        |
|--------|
| 4.042  |
| 0.229  |
| 0.854  |
| -0.164 |
| 0.011  |
| 0.139  |
| 0.332  |
| 0.741  |
| 0.232  |
| -0.359 |
| -0.160 |
| -0.493 |
| 0.118  |
| 0.281  |
| -0.218 |
| 0.364  |
| #NUM!  |
| #NUM!  |
| -0.358 |
| -1.473 |
| -0.250 |
| -0.030 |
| 0.172  |
| -0.013 |
| #NUM!  |
| 0.527  |
| 1.267  |
| 0.289  |
| #NUM!  |
| -0.419 |
| 0.325  |
| 0.395  |
| 0.099  |
| 0.147  |
| 0.320  |
| 0.372  |
| 0.226  |
| 0.088  |
| 0.184  |
| 0.221  |
| 0.477  |
| 0.286  |
| 0.789  |
| -0.099 |
| 0.650  |
| 0.109  |
| #NUM!  |
| 1.503  |
| 0.483  |
| 0.218  |
| 0.093  |

|        |
|--------|
| #NUM!  |
| -2.275 |
| 0.074  |
| 0.163  |
| 0.248  |
| -0.278 |
| -0.406 |
| 0.374  |
| 0.995  |
| 0.300  |
| 2.598  |
| -1.100 |
| -0.105 |
| -0.065 |
| #NUM!  |
| -0.230 |
| 0.111  |
| 0.295  |
| 0.059  |
| 0.477  |
| 0.929  |
| 0.213  |
| 0.469  |
| 0.074  |
| 0.446  |
| 0.152  |
| 0.068  |
| 0.106  |
| 3.793  |
| -0.113 |
| -1.189 |
| #NUM!  |
| -0.023 |
| 1.145  |
| 0.060  |
| -0.014 |
| 0.241  |
| -0.019 |
| 0.455  |
| 0.551  |
| 0.068  |
| 0.599  |
| -0.254 |
| 0.296  |
| 1.160  |
| 0.093  |
| #NUM!  |
| #NUM!  |
| 0.408  |
| -0.321 |
| 0.794  |

|        |
|--------|
| 0.104  |
| 0.155  |
| 0.043  |
| 0.188  |
| -0.503 |
| 0.446  |
| 0.150  |
| #NUM!  |
| -0.064 |
| 0.621  |
| 0.401  |
| 0.469  |
| 0.545  |
| -0.231 |
| 0.244  |
| 1.145  |
| 1.748  |
| 0.137  |
| 0.241  |
| 0.158  |
| -0.219 |
| 0.275  |
| #NUM!  |
| #NUM!  |
| #NUM!  |
| 0.208  |
| 0.713  |
| -0.105 |
| 0.275  |
| 0.220  |
| 0.283  |
| -2.285 |
| 0.448  |
| 0.749  |
| 0.246  |
| 0.369  |
| #NUM!  |
| 0.117  |
| 0.169  |
| -0.162 |
| -0.077 |
| #NUM!  |
| -0.259 |
| -1.071 |
| -0.043 |
| 0.532  |
| -0.689 |
| 0.379  |
| 0.021  |
| 1.193  |
| 1.213  |



|        |
|--------|
| -0.877 |
| 0.432  |
| 1.102  |
| -0.110 |
| 0.398  |
| 0.387  |
| 0.213  |
| -0.051 |
| 1.038  |
| -0.164 |
| 0.000  |
| 0.340  |
| 0.453  |
| 0.374  |
| 0.805  |
| 0.302  |
| 0.294  |
| 0.370  |
| 0.305  |
| 0.441  |
| 0.538  |
| -0.716 |
| -0.199 |
| 0.076  |
| -0.631 |
| -2.290 |
| -0.077 |
| 0.300  |
| 0.002  |
| 2.340  |
| 0.355  |
| 1.688  |
| 0.191  |
| #NUM!  |
| #NUM!  |
| 0.575  |
| 0.717  |
| -1.368 |
| -0.386 |
| #NUM!  |
| -0.115 |
| -0.309 |
| 0.442  |
| -0.929 |
| -0.072 |
| 0.218  |
| 0.306  |
| 0.154  |
| -0.010 |
| 0.087  |
| 0.165  |

|        |
|--------|
| #NUM!  |
| -0.254 |
| 0.184  |
| #NUM!  |
| -0.704 |
| #NUM!  |
| 0.230  |
| -0.732 |
| #NUM!  |
| 0.189  |
| 0.812  |
| -0.167 |
| -0.105 |
| 0.939  |
| 1.357  |
| 0.519  |
| 0.504  |
| -0.264 |
| 0.161  |
| -0.113 |
| #NUM!  |
| #NUM!  |
| #NUM!  |
| -0.616 |
| 0.358  |
| -0.338 |
| 0.164  |
| 0.097  |
| #NUM!  |
| 0.150  |
| -1.459 |
| #NUM!  |
| -0.479 |
| 1.308  |
| -0.589 |
| 0.332  |
| 0.191  |
| 0.706  |
| -0.729 |
| #NUM!  |
| -1.084 |
| -0.201 |
| #NUM!  |
| -0.461 |
| -0.745 |
| 0.158  |
| 0.338  |
| -0.042 |
| -0.932 |
| 0.081  |
| -1.008 |

|        |
|--------|
| -0.285 |
| 0.166  |
| 0.002  |
| -0.231 |
| 0.833  |
| 0.022  |
| 0.534  |
| 0.115  |
| -0.514 |
| -0.354 |
| -0.085 |
| 0.312  |
| -0.222 |
| 0.349  |
| #NUM!  |
| 0.350  |
| -0.041 |
| -0.018 |
| 0.201  |
| -0.170 |
| 0.109  |
| #NUM!  |
| -0.288 |
| -0.137 |
| 0.170  |
| -0.053 |
| 0.854  |
| #NUM!  |
| 0.730  |
| -0.926 |
| #NUM!  |
| -1.487 |
| #NUM!  |
| #NUM!  |
| -0.386 |
| #NUM!  |
| #NUM!  |
| 1.252  |
| -0.451 |
| #NUM!  |
| -0.240 |
| -0.110 |
| 0.597  |
| 0.178  |
| 0.144  |
| 0.009  |
| 0.245  |
| -0.038 |
| -0.084 |
| 1.570  |
| 0.447  |

|        |
|--------|
| 0.160  |
| 0.279  |
| -0.253 |
| -0.290 |
| #NUM!  |
| 0.839  |
| #NUM!  |
| 0.016  |
| -0.251 |
| 0.509  |
| -0.351 |
| #NUM!  |
| -0.741 |
| #NUM!  |
| 0.136  |
| -0.562 |
| 0.150  |
| 0.602  |
| 0.265  |
| 0.866  |
| -0.198 |
| -0.111 |
| -0.790 |
| -0.033 |
| -0.143 |
| -0.389 |
| -0.360 |
| -0.138 |
| 0.345  |
| #NUM!  |
| 0.098  |
| 0.118  |
| 0.395  |
| 0.145  |
| -0.316 |
| 0.373  |
| -0.023 |
| 0.480  |
| -0.622 |
| -0.265 |
| -0.455 |
| #NUM!  |
| 0.524  |
| -0.961 |
| 0.435  |
| 0.406  |
| -0.047 |
| 0.108  |
| #NUM!  |
| -2.245 |
| -1.269 |

|        |
|--------|
| -0.829 |
| 0.599  |
| 0.384  |
| 0.549  |
| -0.190 |
| -0.036 |
| -0.429 |
| 0.520  |
| 0.442  |
| #NUM!  |
| 0.013  |
| -0.522 |
| 0.433  |
| -0.016 |
| 2.438  |
| 0.468  |
| -0.751 |
| -0.234 |
| #NUM!  |
| #NUM!  |
| -0.133 |
| -0.546 |
| -0.523 |
| -0.704 |
| -0.100 |
| #NUM!  |
| #NUM!  |
| 0.211  |
| 0.788  |
| 1.253  |
| 0.012  |
| -0.119 |
| -1.476 |
| 0.073  |
| #NUM!  |
| -0.744 |
| -0.200 |
| -2.171 |
| -0.060 |
| -0.517 |
| 0.205  |
| -0.088 |
| 0.440  |
| 0.271  |
| -0.364 |
| 1.049  |
| #NUM!  |
| #NUM!  |
| 0.279  |
| 0.088  |
| 0.357  |

|        |
|--------|
| 0.169  |
| 0.784  |
| 0.527  |
| 0.288  |
| 0.194  |
| 0.273  |
| -0.514 |
| -0.063 |
| 0.447  |
| -0.738 |
| -0.456 |
| -0.252 |
| 0.506  |
| -0.043 |
| 0.310  |
| 0.278  |
| 0.400  |
| 0.528  |
| 0.176  |
| #NUM!  |
| -0.106 |
| 0.088  |
| 0.801  |
| 0.314  |
| -0.229 |
| 0.087  |
| -0.016 |
| 0.905  |
| -1.005 |
| 0.345  |
| 0.113  |
| 0.197  |
| 0.035  |
| 0.056  |
| -1.106 |
| 1.385  |
| -0.455 |
| 0.283  |
| 0.045  |
| 0.422  |
| 0.284  |
| 0.153  |
| 0.165  |
| #NUM!  |
| 1.726  |
| 0.111  |
| -0.516 |
| 0.156  |
| 0.569  |
| #NUM!  |
| #NUM!  |

|        |
|--------|
| -0.253 |
| 1.056  |
| 0.695  |
| #NUM!  |
| #NUM!  |
| 0.950  |
| 0.139  |
| 0.290  |
| 1.161  |
| 0.269  |
| -0.645 |
| 0.251  |
| 0.018  |
| 0.266  |
| #NUM!  |
| -0.384 |
| -0.117 |
| 0.026  |
| 0.053  |
| -0.188 |
| -0.396 |
| 0.845  |
| 0.031  |
| #NUM!  |
| #NUM!  |
| -0.057 |
| 0.585  |
| 0.098  |
| 0.267  |
| -0.612 |
| 0.142  |
| -0.294 |
| 1.453  |
| #NUM!  |
| 0.023  |
| 0.461  |
| -0.366 |
| 0.310  |
| -0.380 |
| -0.098 |
| -0.420 |
| 0.263  |
| 0.251  |
| -0.472 |
| #NUM!  |
| 0.301  |
| 0.241  |
| -0.167 |
| -0.085 |
| 0.297  |
| 0.324  |

|        |
|--------|
| 0.130  |
| 0.951  |
| 0.169  |
| 0.178  |
| -0.446 |
| -0.312 |
| 1.425  |
| 0.252  |
| 0.200  |
| -0.625 |
| -1.286 |
| -0.828 |
| -0.081 |
| #NUM!  |
| -0.141 |
| -0.032 |
| #NUM!  |
| 0.548  |
| 0.192  |
| -0.090 |
| 0.370  |
| 0.185  |
| 1.178  |
| 1.958  |
| -0.951 |
| -0.173 |
| #NUM!  |
| 0.202  |
| 0.546  |
| 0.273  |
| 0.341  |
| -0.050 |
| -0.015 |
| -0.111 |
| 1.081  |
| 0.318  |
| -0.046 |
| 0.547  |
| 0.412  |
| #NUM!  |
| #NUM!  |
| 0.450  |
| -0.499 |
| 0.556  |
| 0.221  |
| 0.301  |
| -0.393 |
| 0.551  |
| 0.315  |
| 0.722  |
| 0.123  |



|        |
|--------|
| 0.486  |
| #NUM!  |
| -2.556 |
| 0.391  |
| 0.271  |
| -1.221 |
| 0.816  |
| #NUM!  |
| 0.685  |
| -0.393 |
| 1.927  |
| 0.639  |
| 0.406  |
| 0.165  |
| 0.346  |
| 0.492  |
| 0.330  |
| -1.400 |
| -1.501 |
| 0.662  |
| -0.496 |
| 0.540  |
| #NUM!  |
| 0.505  |
| 1.496  |
| 0.371  |
| #NUM!  |
| -1.015 |
| #NUM!  |
| #NUM!  |
| -0.505 |
| 0.325  |
| -0.570 |
| #NUM!  |
| #NUM!  |
| #NUM!  |
| #NUM!  |
| -0.101 |
| 0.786  |
| 0.696  |
| 0.431  |
| -0.094 |
| -0.109 |
| -0.012 |
| #NUM!  |
| #NUM!  |
| -0.452 |
| -0.924 |
| 0.125  |
| -0.193 |
| 1.053  |

|        |
|--------|
| 0.494  |
| 0.668  |
| 0.258  |
| 0.429  |
| 0.229  |
| 0.090  |
| 0.395  |
| 2.425  |
| #NUM!  |
| 0.233  |
| 0.322  |
| 2.440  |
| -0.326 |
| 0.214  |
| 0.383  |
| -0.051 |
| 0.363  |
| -0.091 |
| 0.250  |
| #NUM!  |
| 0.489  |
| 0.021  |
| -0.243 |
| 0.077  |
| 0.241  |
| 0.432  |
| -0.026 |
| -0.252 |
| 0.080  |
| 0.332  |
| #NUM!  |
| 0.372  |
| 0.022  |
| #NUM!  |
| -3.756 |
| 1.009  |
| #NUM!  |
| 0.735  |
| 1.807  |
| 0.062  |
| -0.188 |
| 0.231  |
| 0.492  |
| -0.903 |
| 0.439  |
| -0.176 |
| -0.637 |
| #NUM!  |
| 0.883  |
| 0.243  |
| -0.688 |

|        |
|--------|
| #NUM!  |
| #NUM!  |
| 0.463  |
| 0.266  |
| 0.321  |
| 0.400  |
| 0.387  |
| -0.264 |
| -0.638 |
| #NUM!  |
| -0.650 |
| #NUM!  |
| #NUM!  |
| -0.073 |
| -0.409 |
| 0.358  |
| #NUM!  |
| 0.245  |
| 0.367  |
| -2.317 |
| 0.409  |
| 0.642  |
| -0.187 |
| 0.781  |
| -1.586 |
| #NUM!  |
| 0.825  |
| #NUM!  |
| 0.353  |
| 0.901  |
| -0.336 |
| -1.141 |
| -0.116 |
| 0.687  |
| -0.158 |
| 0.511  |
| -0.149 |
| -0.392 |
| -0.026 |
| 0.069  |
| 0.105  |
| 0.475  |
| -0.389 |
| 0.235  |
| 0.214  |
| 0.267  |
| 0.274  |
| 0.420  |
| #NUM!  |
| 0.690  |
| -0.286 |

|        |
|--------|
| 0.352  |
| 0.172  |
| 0.704  |
| -0.014 |
| 0.187  |
| -0.166 |
| 1.347  |
| -0.357 |
| 0.298  |
| 0.584  |
| 0.407  |
| 0.012  |
| 0.165  |
| 1.592  |
| -0.429 |
| 0.785  |
| 0.352  |
| -0.449 |
| #NUM!  |
| -0.191 |
| 0.885  |
| 0.829  |
| #NUM!  |
| #NUM!  |
| -0.126 |
| 3.051  |
| 0.054  |
| -0.002 |
| #NUM!  |
| 0.315  |
| -0.454 |
| 0.986  |
| 0.875  |
| -0.822 |
| #NUM!  |
| 0.097  |
| 0.694  |
| 0.037  |
| 0.924  |
| #NUM!  |
| #NUM!  |
| -0.468 |
| #NUM!  |
| #NUM!  |
| 1.004  |
| 0.366  |
| -0.361 |
| -1.936 |
| #NUM!  |
| 0.512  |
| -0.298 |

|        |
|--------|
| 2.477  |
| 0.691  |
| -0.077 |
| 0.166  |
| 0.153  |
| -0.045 |
| -0.500 |
| 0.288  |
| 0.536  |
| 0.208  |
| #NUM!  |
| 0.573  |
| 0.805  |
| 0.574  |
| 0.232  |
| -0.162 |
| 0.535  |
| 0.606  |
| 0.094  |
| 0.387  |
| 0.790  |
| 0.348  |
| 0.537  |
| #NUM!  |
| -0.414 |
| #NUM!  |
| #NUM!  |
| -0.603 |
| -3.130 |
| -4.237 |
| -0.474 |
| 0.293  |
| 1.054  |
| -0.807 |
| #NUM!  |
| #NUM!  |
| 0.916  |
| -0.136 |
| 0.312  |
| 0.123  |
| #NUM!  |
| 0.013  |
| 0.516  |
| -0.043 |
| #NUM!  |
| -1.667 |
| -0.242 |
| 0.231  |
| 0.416  |
| -0.240 |
| -0.109 |

|        |
|--------|
| -0.354 |
| 0.091  |
| #NUM!  |
| 0.660  |
| -0.150 |
| 0.379  |
| -0.162 |
| 0.450  |
| -0.175 |
| -1.164 |
| #NUM!  |
| 0.130  |
| 0.084  |
| #NUM!  |
| 0.122  |
| 0.833  |
| -0.321 |
| 0.133  |
| 0.207  |
| #NUM!  |
| -0.346 |
| 1.405  |
| 0.405  |
| -0.545 |
| 0.124  |
| -0.294 |
| 0.146  |
| 0.463  |
| #NUM!  |
| 1.165  |
| 0.320  |
| 0.978  |
| 3.560  |
| 0.214  |
| #NUM!  |
| -0.042 |
| 0.027  |
| -1.171 |
| #NUM!  |
| 0.205  |
| 0.204  |
| -0.205 |
| -0.155 |
| 0.123  |
| -0.178 |
| 0.112  |
| 0.733  |
| 0.415  |
| 0.039  |
| 0.639  |
| 0.099  |

|        |
|--------|
| 0.508  |
| -0.549 |
| -0.949 |
| 0.425  |
| #NUM!  |
| 0.802  |
| #NUM!  |
| 0.044  |
| #NUM!  |
| 1.050  |
| 0.304  |
| -1.899 |
| -0.943 |
| 0.826  |
| 0.294  |
| 0.265  |
| 0.018  |
| 0.445  |
| 0.336  |
| -0.254 |
| -0.445 |
| #NUM!  |
| 0.577  |
| 0.375  |
| 1.493  |
| -0.313 |
| #NUM!  |
| 0.515  |
| #NUM!  |
| #NUM!  |
| 0.215  |
| 0.720  |
| 0.386  |
| 0.620  |
| #NUM!  |
| 0.713  |
| -1.413 |
| -0.956 |
| 0.566  |
| -0.817 |
| #NUM!  |
| -0.334 |
| -0.131 |
| 1.500  |
| #NUM!  |
| 0.234  |
| 0.606  |
| 0.737  |
| -0.719 |
| 0.284  |
| 0.449  |

|        |
|--------|
| -0.153 |
| 0.477  |
| -0.171 |
| #NUM!  |
| 0.078  |
| 0.226  |
| -0.608 |
| -0.164 |
| #NUM!  |
| #NUM!  |
| -0.030 |
| -0.860 |
| -0.259 |
| 0.595  |
| 0.132  |
| #NUM!  |
| -0.672 |
| 0.990  |
| -0.190 |
| -0.418 |
| 0.421  |
| -1.032 |
| 0.266  |
| 0.212  |
| 0.292  |
| 0.329  |
| 1.063  |
| 0.718  |
| 0.149  |
| 0.147  |
| 0.083  |
| 0.618  |
| -0.733 |
| #NUM!  |
| #NUM!  |
| -0.406 |
| -0.246 |
| 0.364  |
| 0.430  |
| -0.018 |
| 0.044  |
| #NUM!  |
| 0.348  |
| 2.457  |
| #NUM!  |
| 0.379  |
| 0.322  |
| #NUM!  |
| 0.331  |
| -0.299 |
| -0.856 |



|        |
|--------|
| 0.536  |
| 0.777  |
| 0.535  |
| 0.840  |
| 0.144  |
| 0.344  |
| -1.439 |
| 0.256  |
| 0.105  |
| 0.014  |
| -0.094 |
| -1.887 |
| -0.139 |
| 0.121  |
| 0.525  |
| 0.360  |
| 0.978  |
| 0.240  |
| #NUM!  |
| -0.048 |
| 0.067  |
| -0.818 |
| -0.046 |
| 0.137  |
| -0.168 |
| -0.659 |
| 0.365  |
| -0.059 |
| 1.348  |
| 0.109  |
| 0.599  |
| 0.222  |
| 1.512  |
| -0.554 |
| 0.038  |
| #NUM!  |
| -0.120 |
| 0.217  |
| #NUM!  |
| -0.118 |
| -0.048 |
| 0.143  |
| #NUM!  |
| 0.653  |
| -1.826 |
| 1.534  |
| #NUM!  |
| 0.239  |
| -0.419 |
| 0.319  |
| -3.785 |

|        |
|--------|
| 0.015  |
| 0.479  |
| 0.373  |
| 0.722  |
| #NUM!  |
| -0.090 |
| 0.440  |
| 2.019  |
| -0.612 |
| -0.926 |
| 0.161  |
| #NUM!  |
| 0.639  |
| #NUM!  |
| -0.549 |
| -0.650 |
| -0.279 |
| -0.092 |
| 0.247  |
| -0.526 |
| -0.262 |
| -0.374 |
| -1.273 |
| -0.401 |
| -1.221 |
| 0.952  |
| -0.175 |
| -0.303 |
| 0.128  |
| 0.083  |
| 0.000  |
| -0.012 |
| #NUM!  |
| #NUM!  |
| 1.024  |
| -0.169 |
| -0.013 |
| -0.026 |
| 0.254  |
| #NUM!  |
| 0.274  |
| -0.118 |
| 0.096  |
| 0.179  |
| -0.127 |
| 0.857  |
| -0.062 |

|        |
|--------|
| 0.200  |
| 0.241  |
| 0.073  |
| 0.169  |
| -0.025 |
| 0.237  |
| -0.025 |
| -0.415 |
| 0.088  |
| -0.130 |
| -0.365 |
| 0.015  |
| -0.371 |
| -0.145 |
| 0.599  |
| 1.252  |
| 0.518  |
| 0.066  |
| 0.811  |
| -0.248 |
| -0.376 |
| 1.437  |
| 0.354  |
| 0.864  |
| 0.657  |
| 0.142  |
| 2.853  |
| 0.021  |
| 0.548  |
| 0.212  |
| 0.255  |
| 0.267  |
| #NUM!  |
| 0.367  |
| #NUM!  |
| -0.212 |
| #NUM!  |
| #NUM!  |
| #NUM!  |
| 0.405  |
| #NUM!  |
| -0.310 |
| -0.003 |
| -0.368 |
| -0.151 |
| 0.867  |
| 0.376  |
| -0.639 |
| 0.303  |
| -1.319 |
| -0.850 |

|        |
|--------|
| -1.198 |
| -2.906 |
| -0.875 |
| -1.289 |
| #NUM!  |
| 0.070  |
| #NUM!  |
| -0.112 |
| 0.065  |
| #NUM!  |
| #NUM!  |
| #NUM!  |
| 0.355  |
| 0.361  |
| -0.439 |
| 0.423  |
| 0.067  |
| #NUM!  |
| 0.283  |
| -0.408 |
| -0.455 |
| -0.306 |
| 0.026  |
| -0.705 |
| #NUM!  |
| -0.143 |
| -0.527 |
| 0.505  |
| -0.052 |
| -0.239 |
| 0.249  |
| 0.006  |
| 2.311  |
| -0.027 |
| #NUM!  |
| #NUM!  |
| -0.311 |
| -0.193 |
| 0.766  |
| 0.416  |
| 0.221  |
| 0.737  |
| 0.985  |
| 0.026  |
| -0.680 |
| 0.451  |
| 0.718  |
| 0.311  |
| 0.144  |
| -0.407 |
| 0.082  |

|        |
|--------|
| -0.066 |
| -0.594 |
| 0.397  |
| 0.120  |
| 1.005  |
| 0.263  |
| 0.028  |
| 0.153  |
| #NUM!  |
| 0.016  |
| 0.172  |
| #NUM!  |
| -1.379 |
| #NUM!  |
| 0.112  |
| 0.031  |
| 1.213  |
| 0.044  |
| #NUM!  |
| #NUM!  |
| 0.080  |
| -0.032 |
| 0.136  |
| -0.653 |
| -1.158 |
| -0.964 |
| 0.571  |
| -0.332 |
| -0.340 |
| 0.172  |
| -0.047 |
| -0.285 |
| 0.596  |
| -0.169 |
| 0.365  |
| #NUM!  |
| 0.430  |
| 0.046  |
| 0.096  |
| 1.352  |
| 0.146  |
| -0.220 |
| -0.256 |
| #NUM!  |
| -0.298 |
| 1.296  |
| 1.136  |
| 0.721  |
| -0.111 |
| -0.021 |
| -0.779 |

|        |
|--------|
| 0.086  |
| 1.078  |
| 0.305  |
| 0.145  |
| 0.407  |
| 0.413  |
| 0.582  |
| 0.411  |
| 0.399  |
| 0.029  |
| 0.474  |
| 0.209  |
| 0.674  |
| -0.568 |
| 0.602  |
| -0.814 |
| 1.650  |
| 0.385  |
| 0.427  |
| 0.421  |
| -0.106 |
| 0.268  |
| #NUM!  |
| 0.580  |
| #NUM!  |
| #NUM!  |
| 0.753  |
| #NUM!  |
| 0.372  |
| 0.231  |
| 0.255  |
| -0.664 |
| -0.407 |
| 0.806  |
| 0.111  |
| 0.559  |
| 1.090  |
| #NUM!  |
| 0.477  |
| 0.111  |
| 0.165  |
| #NUM!  |
| 0.559  |
| 1.317  |
| 0.261  |
| 0.341  |
| -0.941 |
| 0.684  |
| 0.978  |
| -0.193 |
| -0.782 |

|        |
|--------|
| #NUM!  |
| 0.679  |
| 0.401  |
| #NUM!  |
| 0.456  |
| -0.190 |
| 1.952  |
| -0.194 |
| 2.305  |
| 0.018  |
| -0.558 |
| -1.203 |
| 0.396  |
| -0.172 |
| 0.010  |
| -0.026 |
| 0.694  |
| #NUM!  |
| -2.128 |
| 0.102  |
| -0.237 |
| -0.111 |
| 0.260  |
| -0.438 |
| 1.742  |
| 0.417  |
| 0.673  |
| 0.392  |
| 0.408  |
| -0.151 |
| -0.196 |
| 0.365  |
| -0.182 |
| 1.405  |
| 0.603  |
| -0.010 |
| -0.077 |
| -0.117 |
| 0.373  |
| -0.198 |
| -0.147 |
| -0.188 |
| -0.165 |
| 0.658  |
| 0.068  |
| 0.435  |
| 1.195  |
| 0.134  |
| -0.473 |
| -0.084 |
| -0.068 |

|        |
|--------|
| -0.078 |
| 0.431  |
| #NUM!  |
| -0.243 |
| 0.339  |
| -0.756 |
| -0.098 |
| -0.265 |
| -0.110 |
| 0.164  |
| -0.148 |
| 0.204  |
| -0.260 |
| 0.693  |
| -0.305 |
| -0.221 |
| 0.166  |
| -0.784 |
| #NUM!  |
| 0.497  |
| 0.230  |
| -0.021 |
| 0.258  |
| 0.496  |
| 0.866  |
| -0.044 |
| 0.188  |
| 0.373  |
| -0.034 |
| -0.022 |
| -0.728 |
| 0.091  |
| -0.253 |
| 0.147  |
| 0.255  |
| -0.114 |
| 0.337  |
| -0.416 |
| -1.879 |
| 0.546  |
| -0.342 |
| 0.110  |
| 0.430  |
| 0.288  |
| -0.409 |
| 0.846  |
| 1.302  |
| -0.323 |
| -0.395 |
| 1.399  |
| 0.488  |



|        |
|--------|
| #NUM!  |
| 0.387  |
| 0.285  |
| 0.107  |
| 0.536  |
| 0.173  |
| 0.292  |
| 0.572  |
| 0.574  |
| -0.405 |
| -0.321 |
| -0.610 |
| 0.005  |
| -0.183 |
| 0.188  |
| 0.108  |
| 0.324  |
| 1.024  |
| 0.421  |
| 0.254  |
| 0.725  |
| 0.087  |
| 0.558  |
| 0.270  |
| 0.836  |
| -0.836 |
| -0.768 |
| 0.183  |
| 0.142  |
| -0.751 |
| 0.087  |
| 0.346  |
| 0.756  |
| -0.470 |
| -0.041 |
| #NUM!  |
| 0.593  |
| -0.075 |
| #NUM!  |
| -0.277 |
| -0.115 |
| 0.348  |
| #NUM!  |
| 0.263  |
| 0.380  |
| 0.538  |
| 0.594  |
| -0.073 |
| -0.161 |
| #NUM!  |
| 0.119  |

|        |
|--------|
| 0.110  |
| 0.195  |
| -0.094 |
| 0.097  |
| 0.203  |
| #NUM!  |
| 0.123  |
| 0.293  |
| 0.716  |
| -0.030 |
| -0.865 |
| 0.807  |
| -0.507 |
| 0.268  |
| -0.027 |
| 0.359  |
| 0.073  |
| -0.631 |
| 0.363  |
| -0.220 |
| -0.034 |
| 0.163  |
| -0.703 |
| -0.076 |
| #NUM!  |
| 0.020  |
| 0.978  |
| 0.295  |
| -0.145 |
| -0.665 |
| -0.145 |
| -0.808 |
| 0.162  |
| 0.059  |
| -0.043 |
| 0.923  |
| -0.038 |
| -0.274 |
| -0.475 |
| -1.035 |
| #NUM!  |
| 0.140  |
| 0.623  |
| 0.131  |
| 0.448  |
| -0.051 |
| -0.652 |
| 0.551  |
| -0.764 |
| -1.252 |
| #NUM!  |

|        |
|--------|
| #NUM!  |
| 0.263  |
| -0.461 |
| #NUM!  |
| -0.346 |
| 0.538  |
| -0.703 |
| #NUM!  |
| 0.598  |
| 0.607  |
| 1.158  |
| #NUM!  |
| 0.635  |
| 0.175  |
| -0.363 |
| 0.414  |
| 0.461  |
| 0.369  |
| #NUM!  |
| 0.078  |
| 0.200  |
| 1.232  |
| #NUM!  |
| 0.497  |
| -0.256 |
| 0.148  |
| -0.015 |
| 0.139  |
| -0.639 |
| -0.140 |
| #NUM!  |
| 0.550  |
| -0.406 |
| -0.081 |
| 0.073  |
| 0.640  |
| -0.447 |
| 0.455  |
| 0.812  |
| 0.391  |
| #NUM!  |
| -1.093 |
| 0.176  |
| 0.109  |
| 0.670  |
| 0.027  |
| 0.653  |
| 0.462  |
| 0.731  |
| 0.311  |
| 1.698  |

|        |
|--------|
| #NUM!  |
| #NUM!  |
| #NUM!  |
| 1.003  |
| 0.514  |
| 0.195  |
| 0.144  |
| 0.492  |
| -0.280 |
| #NUM!  |
| #NUM!  |
| 0.537  |
| 0.082  |
| -0.100 |
| #NUM!  |
| 0.170  |
| 0.542  |
| 0.587  |
| -0.032 |
| 0.224  |
| 0.319  |
| 0.155  |
| 0.355  |
| 0.246  |
| 0.363  |
| #NUM!  |
| -0.322 |
| -0.151 |
| 0.506  |
| 0.865  |
| 0.383  |
| 0.450  |
| -1.293 |
| 0.055  |
| 0.237  |
| -0.265 |
| 0.467  |
| 0.151  |
| 0.410  |
| 0.024  |
| 0.336  |
| 0.469  |
| 0.715  |
| 0.163  |
| 0.393  |
| -0.227 |
| -0.621 |
| -0.011 |
| -0.541 |
| 0.275  |
| 0.916  |

|        |
|--------|
| -0.193 |
| #NUM!  |
| #NUM!  |
| -0.036 |
| #NUM!  |
| 0.304  |
| 0.170  |
| 0.227  |
| 0.227  |
| 0.340  |
| -0.416 |
| 0.526  |
| 0.354  |
| #NUM!  |
| 0.710  |
| 0.017  |
| -0.656 |
| 0.426  |
| -0.005 |
| 0.180  |
| 0.168  |
| -0.125 |
| 0.333  |
| 0.405  |
| -0.072 |
| -0.010 |
| 0.420  |
| -0.257 |
| 0.670  |
| 0.407  |
| 0.143  |
| -0.193 |
| 1.143  |
| 0.398  |
| 0.489  |
| #NUM!  |
| 0.261  |
| 0.408  |
| -0.102 |
| 0.046  |
| 0.124  |
| 0.444  |
| 0.068  |
| #NUM!  |
| 0.350  |
| 0.389  |
| 0.161  |
| 0.195  |
| 0.321  |
| 0.380  |
| 0.158  |

|        |
|--------|
| 0.896  |
| 0.679  |
| 0.194  |
| 0.159  |
| 0.106  |
| 1.147  |
| 0.193  |
| 0.749  |
| -0.037 |
| -0.181 |
| 0.516  |
| -0.721 |
| 0.198  |
| -0.421 |
| 0.856  |
| 0.162  |
| 0.446  |
| -0.641 |
| #NUM!  |
| #NUM!  |
| 0.305  |
| -0.118 |
| -0.531 |
| 0.185  |
| -0.771 |
| 1.068  |
| 0.604  |
| 0.295  |
| 0.341  |
| #NUM!  |
| #NUM!  |
| 0.270  |
| -0.668 |
| -0.082 |
| 0.159  |
| -0.367 |
| -0.344 |
| -0.356 |
| -0.292 |
| 0.104  |
| -0.290 |
| -1.182 |
| #NUM!  |
| 1.509  |
| #NUM!  |
| #NUM!  |
| 0.637  |
| #NUM!  |
| -0.008 |
| 0.008  |
| -0.876 |

|        |
|--------|
| #NUM!  |
| 0.977  |
| #NUM!  |
| #NUM!  |
| 0.340  |
| #NUM!  |
| -0.007 |
| #NUM!  |
| -0.296 |
| #NUM!  |
| 0.625  |
| #NUM!  |
| #NUM!  |
| -2.564 |
| 1.279  |
| 1.361  |
| #NUM!  |
| #NUM!  |
| -2.226 |
| -1.147 |
| #NUM!  |
| #NUM!  |
| #NUM!  |
| 0.102  |
| #NUM!  |
| #NUM!  |
| #NUM!  |
| 3.729  |
| 0.166  |
| #NUM!  |
| -0.282 |
| 0.070  |
| 1.346  |
| #NUM!  |
| 0.072  |
| -0.425 |
| 0.213  |
| 0.846  |
| 0.666  |
| -0.752 |
| 0.443  |
| -0.296 |
| -0.784 |
| -0.064 |
| 0.261  |
| #NUM!  |
| -0.967 |

|        |
|--------|
| #NUM!  |
| 0.449  |
| #NUM!  |
| #NUM!  |
| #NUM!  |
| -1.710 |
| #NUM!  |
| 1.439  |
| #NUM!  |
| -1.957 |
| #NUM!  |
| -0.360 |
| #NUM!  |
| -0.403 |
| #NUM!  |
| 0.116  |
| 0.369  |
| 2.444  |
| 0.438  |
| 0.383  |
| 0.374  |
| #NUM!  |
| 1.418  |
| 0.890  |
| 0.540  |
| 0.234  |
| 0.088  |
| -0.107 |
| 0.176  |
| -0.603 |
| 0.524  |
| 0.334  |
| -0.373 |
| 0.403  |
| 0.511  |
| -0.688 |
| -0.831 |
| -0.419 |
| 0.003  |
| 1.769  |
| 1.006  |



|        |
|--------|
| 1.001  |
| -0.148 |
| 0.082  |
| 0.436  |
| 0.259  |
| 0.039  |
| 0.172  |
| 0.592  |
| 0.681  |
| #NUM!  |
| 0.173  |
| 0.245  |
| 0.045  |
| 2.361  |
| -0.168 |
| -0.142 |
| 0.020  |
| -0.032 |
| -0.346 |
| 0.237  |
| -0.876 |
| 0.017  |
| 0.135  |
| 0.366  |
| 0.173  |
| #NUM!  |
| -0.694 |
| -0.989 |
| 0.137  |
| 0.333  |
| 0.985  |
| 0.126  |
| -0.659 |
| -0.015 |
| -0.345 |
| 0.184  |
| 1.900  |
| 0.241  |
| 0.682  |
| #NUM!  |
| -1.074 |
| -0.089 |
| -0.197 |
| 0.345  |
| 0.598  |
| 0.620  |
| 0.004  |
| -0.305 |
| #NUM!  |
| #NUM!  |
| #NUM!  |

|        |
|--------|
| 0.118  |
| #NUM!  |
| 1.289  |
| #NUM!  |
| #NUM!  |
| 0.066  |
| 0.692  |
| #NUM!  |
| -0.392 |
| 0.828  |
| -0.381 |
| 0.253  |
| -1.284 |
| 0.244  |
| 0.255  |
| #NUM!  |
| 0.453  |
| 0.538  |
| 0.591  |
| 0.100  |
| 0.466  |
| -1.230 |
| 0.440  |
| 0.277  |
| -0.880 |
| 0.279  |
| 0.578  |
| 0.108  |
| #NUM!  |
| -0.244 |
| -0.294 |
| -1.381 |
| 0.469  |
| #NUM!  |
| 1.545  |
| 0.187  |
| 0.417  |
| 0.228  |
| #NUM!  |
| #NUM!  |
| 0.439  |
| 0.197  |
| 0.112  |
| -1.427 |
| -0.663 |
| #NUM!  |
| -0.034 |
| 0.112  |
| 1.009  |
| -0.458 |
| 1.158  |

|        |
|--------|
| -0.082 |
| 0.324  |
| 0.414  |
| 0.324  |
| -0.028 |
| 0.141  |
| 0.404  |
| 1.161  |
| -0.257 |
| 0.979  |
| 1.644  |
| 0.156  |
| 1.788  |
| 0.966  |
| -1.603 |
| -0.274 |
| -0.223 |
| 0.179  |
| -1.860 |
| 0.334  |
| -0.070 |
| 0.398  |
| -0.748 |
| -0.849 |
| 1.317  |
| 0.365  |
| -0.576 |
| -1.013 |
| -1.393 |
| #NUM!  |
| -0.841 |
| #NUM!  |
| -0.800 |
| 0.690  |
| -0.169 |
| 0.261  |
| -0.211 |
| 0.469  |
| -0.252 |
| 0.376  |
| 0.023  |
| #NUM!  |
| #NUM!  |
| -0.030 |
| 0.248  |
| 1.303  |
| #NUM!  |
| 0.358  |
| 0.850  |
| 0.418  |
| 0.324  |

|        |
|--------|
| 0.465  |
| 1.075  |
| -0.273 |
| #NUM!  |
| -0.906 |
| -2.285 |
| -0.115 |
| 0.683  |
| #NUM!  |
| -0.139 |
| -1.085 |
| -1.455 |
| 0.544  |
| 0.097  |
| -0.893 |
| 0.154  |
| -1.101 |
| -0.310 |
| -0.169 |
| 0.032  |
| 0.366  |
| 0.301  |
| -0.057 |
| -0.676 |
| 0.488  |
| -0.028 |
| #NUM!  |
| 0.748  |
| 0.391  |
| -0.950 |
| 0.166  |
| 0.343  |
| 1.095  |
| -0.319 |
| 0.030  |
| -0.790 |
| -0.484 |
| 0.746  |
| #NUM!  |
| 4.657  |
| 0.470  |
| -0.964 |
| #NUM!  |
| -0.623 |
| 0.842  |
| 0.401  |
| -0.133 |
| 0.181  |
| 0.128  |
| -0.183 |
| -0.031 |

|        |
|--------|
| 0.238  |
| -0.234 |
| -0.411 |
| 0.097  |
| #NUM!  |
| 0.289  |
| 0.354  |
| #NUM!  |
| -0.318 |
| -1.323 |
| -1.325 |
| -1.261 |
| -0.022 |
| -0.341 |
| -2.313 |
| -0.225 |
| 0.429  |
| #NUM!  |
| -0.078 |
| -0.075 |
| #NUM!  |
| 1.746  |
| -0.980 |
| 1.168  |
| -1.949 |
| 0.078  |
| 0.168  |
| #NUM!  |
| -0.129 |
| #NUM!  |
| 2.306  |
| #NUM!  |
| 0.306  |
| 0.655  |
| 0.115  |
| 0.134  |
| -0.161 |
| 0.305  |
| -0.594 |
| -0.074 |
| -0.609 |
| 1.159  |
| 0.819  |
| 0.224  |
| 0.296  |
| -0.036 |
| 0.245  |
| 0.126  |
| -0.296 |
| -0.019 |
| -0.709 |

|        |
|--------|
| -0.037 |
| 0.014  |
| 0.094  |
| 0.386  |
| #NUM!  |
| 0.658  |
| -0.185 |
| 0.848  |
| -0.164 |
| -0.533 |
| #NUM!  |
| 0.869  |
| -0.044 |
| 0.376  |
| #NUM!  |
| -0.447 |
| 0.208  |
| 0.326  |
| 0.693  |
| 0.143  |
| -0.022 |
| 0.161  |
| -0.586 |
| 0.342  |
| 0.728  |
| -0.463 |
| -0.021 |
| 0.861  |
| 0.500  |
| 0.215  |
| -0.919 |
| -0.105 |
| 0.195  |
| 0.636  |
| 0.349  |
| 0.227  |
| 0.092  |
| -0.017 |
| -0.065 |
| -0.449 |
| -0.354 |
| #NUM!  |
| -0.812 |
| #NUM!  |
| 0.972  |
| 0.057  |
| 3.062  |
| #NUM!  |
| 0.487  |
| 0.278  |
| -0.539 |

|        |
|--------|
| -0.129 |
| #NUM!  |
| 0.242  |
| 0.153  |
| 0.028  |
| 0.524  |
| -0.007 |
| -0.015 |
| 0.020  |
| -0.551 |
| #NUM!  |
| -0.731 |
| 0.267  |
| 0.539  |
| 0.079  |
| 0.815  |
| 0.572  |
| #NUM!  |
| 0.676  |
| 0.386  |
| -0.227 |
| #NUM!  |
| #NUM!  |
| -0.301 |
| #NUM!  |
| 0.275  |
| 0.362  |
| -0.034 |
| 0.920  |
| -0.028 |
| 0.394  |
| 0.103  |
| 0.383  |
| #NUM!  |
| 0.324  |
| 0.536  |
| -2.037 |
| -0.822 |
| 3.405  |
| 0.340  |
| 0.391  |
| 0.367  |
| 0.026  |
| 1.190  |
| 0.264  |
| 0.347  |
| 1.260  |
| #NUM!  |
| 0.048  |
| 0.285  |
| 0.372  |

|        |
|--------|
| 0.299  |
| 0.882  |
| 1.059  |
| 0.658  |
| -0.450 |
| 1.770  |
| 0.994  |
| 1.300  |
| 0.163  |
| 0.403  |
| 0.594  |
| 1.036  |
| 0.561  |
| -1.056 |
| 0.476  |
| -1.595 |
| 0.344  |
| 0.261  |
| #NUM!  |
| -0.295 |
| #NUM!  |
| -0.308 |
| -0.237 |
| 0.162  |
| 0.460  |
| -0.624 |
| 0.038  |
| -0.360 |
| 0.689  |
| 1.109  |
| -0.470 |
| 0.206  |
| -0.187 |
| 0.273  |
| 1.908  |
| 2.855  |
| -0.196 |
| 0.206  |
| 0.249  |
| -0.666 |
| 1.615  |
| 0.066  |
| -0.343 |
| -0.352 |
| 0.320  |
| 0.749  |
| 0.204  |
| 0.235  |
| -0.480 |
| 0.140  |
| -0.196 |



|        |
|--------|
| 0.004  |
| 0.429  |
| 0.290  |
| 2.808  |
| #NUM!  |
| 0.580  |
| -0.142 |
| -0.536 |
| -0.020 |
| 0.031  |
| #NUM!  |
| -0.133 |
| 0.392  |
| 0.578  |
| 0.787  |
| -0.431 |
| #NUM!  |
| -0.583 |
| 0.435  |
| 0.415  |
| 0.388  |
| 0.699  |
| -0.234 |
| -0.186 |
| -0.249 |
| 0.353  |
| -0.115 |
| 0.143  |
| 0.525  |
| #NUM!  |
| 0.091  |
| -0.820 |
| -0.058 |
| 0.358  |
| 0.589  |
| -0.210 |
| #NUM!  |
| #NUM!  |
| #NUM!  |
| 0.198  |
| 0.193  |
| 0.727  |
| 0.522  |
| 1.072  |
| #NUM!  |
| 0.230  |
| 1.347  |
| 0.252  |
| #NUM!  |
| -0.053 |
| -0.110 |

|        |
|--------|
| #NUM!  |
| 0.383  |
| 0.887  |
| 0.482  |
| 0.176  |
| 0.037  |
| 0.073  |
| -0.985 |
| -0.724 |
| 0.591  |
| 0.168  |
| -0.324 |
| -0.338 |
| #NUM!  |
| #NUM!  |
| -0.145 |
| -0.010 |
| 0.166  |
| 0.197  |
| 0.134  |
| 0.947  |
| 0.839  |
| -0.381 |
| -0.117 |
| 0.420  |
| -0.144 |
| 0.691  |
| -0.376 |
| 0.363  |
| -0.513 |
| -0.105 |
| -0.774 |
| 0.363  |
| 0.221  |
| #NUM!  |
| -0.003 |
| #NUM!  |
| 0.067  |
| -0.095 |
| 0.567  |
| 0.145  |
| 0.090  |
| -0.270 |
| 0.268  |
| -3.231 |
| -0.316 |
| #NUM!  |
| -0.637 |
| 0.383  |
| -0.689 |
| 0.039  |

|        |
|--------|
| 0.501  |
| 0.434  |
| -0.759 |
| #NUM!  |
| 0.569  |
| 0.406  |
| -1.533 |
| #NUM!  |
| 0.952  |
| 0.349  |
| #NUM!  |
| 1.314  |
| 0.146  |
| #NUM!  |
| -0.267 |
| 0.396  |
| 0.891  |
| 0.264  |
| 0.021  |
| -0.639 |
| -0.204 |
| 0.523  |
| -0.267 |
| 0.152  |
| -0.565 |
| -0.309 |
| 0.727  |
| -0.001 |
| 0.430  |
| 0.888  |
| #NUM!  |
| 0.789  |
| -0.355 |
| -0.382 |
| 0.797  |
| 0.374  |
| 0.274  |
| 0.127  |
| 0.451  |
| 0.248  |
| -0.142 |
| -0.047 |
| 0.365  |
| #NUM!  |
| #NUM!  |
| -0.390 |
| -0.317 |
| 0.540  |
| 0.272  |
| -0.019 |
| 0.316  |

|        |
|--------|
| 0.118  |
| 0.114  |
| 0.810  |
| 0.292  |
| 0.679  |
| -0.199 |
| -0.089 |
| -0.343 |
| 0.094  |
| 1.699  |
| -0.749 |
| -0.286 |
| 0.154  |
| 0.463  |
| -0.451 |
| 0.099  |
| 0.978  |
| 0.332  |
| #NUM!  |
| -0.258 |
| -0.094 |
| -0.578 |
| -0.165 |
| -0.271 |
| -0.251 |
| -0.288 |
| -0.052 |
| 0.261  |
| 0.548  |
| 0.693  |
| 0.212  |
| -0.066 |
| 0.379  |
| #NUM!  |
| 0.560  |
| 0.075  |
| 0.278  |
| 0.585  |
| -0.047 |
| -0.045 |
| 0.296  |
| #NUM!  |
| 1.098  |
| -0.057 |
| -0.152 |
| #NUM!  |
| 0.885  |
| -0.204 |
| 0.229  |
| 0.566  |
| 0.361  |

|        |
|--------|
| 0.034  |
| 0.278  |
| 0.270  |
| 1.348  |
| 0.219  |
| -1.854 |
| -1.199 |
| -0.028 |
| 0.286  |
| -0.038 |
| 0.875  |
| -0.427 |
| 1.048  |
| -0.554 |
| 0.683  |
| 0.816  |
| #NUM!  |
| -1.096 |
| #NUM!  |
| 0.662  |
| 0.944  |
| 0.457  |
| 0.685  |
| #NUM!  |
| 0.432  |
| 1.338  |
| 0.287  |
| 0.310  |
| 1.555  |
| 0.057  |
| -0.406 |
| 0.666  |
| -0.113 |
| -0.425 |
| 1.029  |
| 0.899  |
| 0.217  |
| 2.034  |
| -3.261 |
| 0.081  |
| -0.204 |
| #NUM!  |
| -0.511 |
| -0.877 |
| #NUM!  |
| -0.243 |
| 0.722  |
| -0.663 |
| 0.005  |
| 0.281  |
| 0.023  |

|        |
|--------|
| -0.967 |
| -0.358 |
| 0.322  |
| 0.412  |
| 0.100  |
| -1.236 |
| 0.290  |
| 0.461  |
| 0.690  |
| -0.482 |
| 0.398  |
| 0.018  |
| 0.048  |
| 0.285  |
| -0.370 |
| 0.180  |
| 0.573  |
| -0.534 |
| -1.007 |
| -0.990 |
| 0.298  |
| -0.389 |
| -0.455 |
| 0.047  |
| 0.456  |
| 0.658  |
| 0.321  |
| 0.640  |
| #NUM!  |
| -0.304 |
| 0.821  |
| 0.305  |
| #NUM!  |
| 0.153  |
| -0.216 |
| 2.003  |
| 0.062  |
| -0.114 |
| 0.344  |
| -0.100 |
| 0.491  |
| 0.561  |
| 0.477  |
| 0.343  |
| 0.220  |
| 0.325  |
| #NUM!  |
| 0.042  |
| 0.141  |
| 0.200  |
| 0.602  |

|        |
|--------|
| -0.782 |
| #NUM!  |
| 0.060  |
| 0.090  |
| -0.196 |
| -0.974 |
| 0.025  |
| #NUM!  |
| 0.584  |
| #NUM!  |
| -0.569 |
| 0.491  |
| -0.023 |
| 0.405  |
| 0.426  |
| 0.235  |
| -0.198 |
| 0.679  |
| -0.837 |
| 0.548  |
| -1.327 |
| -0.521 |
| 0.048  |
| 0.493  |
| 0.331  |
| 0.226  |
| -0.133 |
| 0.216  |
| #NUM!  |
| 0.927  |
| 0.318  |
| 0.171  |
| -0.049 |
| 0.373  |
| 0.110  |
| 0.227  |
| #NUM!  |
| 0.332  |
| 0.855  |
| #NUM!  |
| 0.367  |
| -0.510 |
| #NUM!  |
| 0.697  |
| #NUM!  |
| 0.238  |
| 0.379  |
| 0.295  |
| 0.592  |
| 0.220  |
| -0.309 |

|        |
|--------|
| 0.402  |
| 0.415  |
| #NUM!  |
| 0.462  |
| 0.344  |
| #NUM!  |
| -0.429 |
| 0.065  |
| 0.072  |
| 0.018  |
| 0.366  |
| 1.270  |
| 0.253  |
| 0.599  |
| -0.065 |
| 0.164  |
| 0.627  |
| 0.588  |
| -0.795 |
| 0.649  |
| 0.784  |
| -0.055 |
| -0.267 |
| 0.427  |
| 0.268  |
| 0.517  |
| 0.106  |
| -1.865 |
| -0.199 |
| #NUM!  |
| -0.028 |
| 0.120  |
| -1.790 |
| 0.148  |
| -1.192 |
| -2.486 |
| -0.142 |
| 0.409  |
| 0.076  |
| 0.065  |
| -1.595 |
| -0.148 |
| 0.294  |
| 0.147  |
| 0.665  |
| 0.572  |
| 0.712  |
| -0.202 |
| -0.231 |
| -0.045 |
| 0.014  |



|        |
|--------|
| -0.170 |
| 0.339  |
| 0.170  |
| -0.160 |
| -0.089 |
| 0.287  |
| 0.643  |
| 1.022  |
| -0.027 |
| 0.687  |
| 0.003  |
| -1.250 |
| -0.767 |
| 0.647  |
| #NUM!  |
| 0.048  |
| 0.068  |
| 0.262  |
| #NUM!  |
| 2.748  |
| -0.013 |
| 0.374  |
| -0.412 |
| #NUM!  |
| #NUM!  |
| 0.891  |
| 2.558  |
| -0.046 |
| 0.354  |
| -0.863 |
| 0.547  |
| 0.566  |
| 0.150  |
| 0.983  |
| 0.143  |
| 0.200  |
| -0.513 |
| -1.798 |
| 0.094  |
| -0.389 |
| #NUM!  |
| -1.411 |
| 0.130  |
| -0.201 |
| -0.392 |
| 0.127  |
| 0.256  |
| 0.417  |
| 1.217  |
| -0.199 |
| -0.467 |

|        |
|--------|
| 0.014  |
| 0.428  |
| -0.745 |
| #NUM!  |
| -0.277 |
| 0.615  |
| 0.189  |
| #NUM!  |
| 0.167  |
| -0.262 |
| -0.088 |
| 0.397  |
| 0.613  |
| 0.253  |
| 0.510  |
| 0.222  |
| 0.343  |
| 0.436  |
| 0.241  |
| 1.033  |
| 0.084  |
| 0.500  |
| 1.413  |
| 0.210  |
| #NUM!  |
| 0.222  |
| 0.460  |
| 2.354  |
| 0.675  |
| -0.793 |
| 0.087  |
| -0.104 |
| -0.453 |
| -0.162 |
| 0.455  |
| -0.338 |
| #NUM!  |
| -0.902 |
| 2.768  |
| 0.246  |
| 0.338  |
| 0.487  |
| 0.235  |
| -0.503 |
| -0.365 |
| -0.230 |
| -0.008 |
| 0.914  |
| -0.598 |
| -0.840 |
| #NUM!  |

|        |
|--------|
| #NUM!  |
| -0.630 |
| #NUM!  |
| -0.052 |
| 0.347  |
| 1.630  |
| -0.135 |
| 0.219  |
| -0.383 |
| 0.216  |
| 0.237  |
| -0.655 |
| #NUM!  |
| 0.360  |
| 1.952  |
| -0.058 |
| -0.111 |
| -0.160 |
| -0.850 |
| -0.393 |
| #NUM!  |
| -1.793 |
| -1.042 |
| -0.968 |
| 0.490  |
| 0.045  |
| 0.336  |
| 0.049  |
| #NUM!  |
| -0.498 |
| -0.228 |
| 1.137  |
| -0.148 |
| -0.737 |
| 0.110  |
| -0.139 |
| -0.247 |
| 0.190  |
| 1.889  |
| #NUM!  |
| 0.569  |
| -0.472 |
| 0.219  |
| -0.258 |
| #NUM!  |
| -0.143 |
| 0.158  |
| 0.070  |
| #NUM!  |
| 0.762  |
| 0.314  |

|        |
|--------|
| 0.574  |
| -0.303 |
| 0.479  |
| 0.222  |
| -0.342 |
| 0.373  |
| -0.010 |
| #NUM!  |
| -0.027 |
| -0.436 |
| 0.134  |
| 2.702  |
| -0.353 |
| -0.114 |
| #NUM!  |
| 0.503  |
| -0.411 |
| 0.033  |
| 0.478  |
| 0.381  |
| 0.483  |
| -0.359 |
| #NUM!  |
| -0.239 |
| 1.637  |
| 0.621  |
| 0.456  |
| 0.342  |
| 0.449  |
| 0.331  |
| 0.175  |
| 0.463  |
| -1.045 |
| 0.892  |
| 0.087  |
| 0.481  |
| 1.431  |
| 0.327  |
| -0.123 |
| 0.120  |
| -0.419 |
| 0.496  |
| 0.685  |
| 0.398  |
| 0.076  |
| 0.690  |
| 0.530  |
| 0.718  |
| 0.072  |
| #NUM!  |
| 0.008  |

|        |
|--------|
| -1.044 |
| -0.932 |
| -0.499 |
| -0.344 |
| 0.369  |
| #NUM!  |
| -0.169 |
| -0.230 |
| 0.359  |
| 0.358  |
| 0.026  |
| 0.391  |
| 0.119  |
| 0.739  |
| 0.594  |
| 0.369  |
| 0.155  |
| -0.282 |
| -1.743 |
| #NUM!  |
| -0.424 |
| 0.252  |
| 0.151  |
| 0.650  |
| 0.331  |
| 0.547  |
| 0.655  |
| -0.062 |
| 1.140  |
| -0.671 |
| #NUM!  |
| 0.011  |
| -0.470 |
| 0.976  |
| 0.015  |
| -0.195 |
| #NUM!  |
| #NUM!  |
| -0.119 |
| #NUM!  |
| 0.464  |
| -0.364 |
| -0.912 |
| -1.531 |
| 0.411  |
| 0.234  |
| 0.851  |
| 0.233  |
| 1.042  |
| 0.437  |
| -0.745 |

|        |
|--------|
| 3.349  |
| 0.904  |
| -1.531 |
| 0.262  |
| 0.417  |
| 0.232  |
| 0.191  |
| -0.048 |
| 1.303  |
| 0.434  |
| -0.395 |
| 0.435  |
| -0.538 |
| -0.691 |
| -0.572 |
| 0.098  |
| 0.117  |
| 1.833  |
| 0.062  |
| #NUM!  |
| 0.254  |
| 0.157  |
| -2.693 |
| -0.247 |
| -0.190 |
| 0.340  |
| -0.018 |
| 0.042  |
| -0.198 |
| 0.085  |
| 0.548  |
| #NUM!  |
| 0.334  |
| 0.418  |
| -0.374 |
| 0.458  |
| 0.977  |
| 0.419  |
| 0.202  |
| -0.705 |
| -0.961 |
| 0.075  |
| -0.122 |
| -0.216 |
| 0.328  |
| -0.189 |
| -1.658 |
| #NUM!  |
| -0.592 |
| -0.298 |
| -0.206 |

|        |
|--------|
| -0.095 |
| 0.210  |
| #NUM!  |
| 0.703  |
| 0.056  |
| 0.228  |
| 0.042  |
| 0.278  |
| -0.326 |
| 0.547  |
| -0.772 |
| 0.113  |
| -0.228 |
| #NUM!  |
| -0.772 |
| -0.216 |
| -0.589 |
| -0.106 |
| 0.005  |
| 0.274  |
| 0.329  |
| #NUM!  |
| -0.268 |
| -0.071 |
| 0.692  |
| 0.219  |
| 0.390  |
| 1.648  |
| #NUM!  |
| 0.309  |
| 0.513  |
| 0.358  |
| #NUM!  |
| #NUM!  |
| 0.454  |
| 0.303  |
| -0.028 |
| -0.249 |
| 0.343  |
| 1.212  |
| 0.738  |
| 0.221  |
| -0.061 |
| -0.067 |
| -0.079 |
| -0.055 |
| -0.294 |
| 0.420  |
| 0.067  |
| 0.450  |
| -0.366 |

|        |
|--------|
| -0.442 |
| 0.109  |
| -0.203 |
| -0.191 |
| 0.200  |
| 0.479  |
| -0.025 |
| 0.362  |
| 0.344  |
| -1.849 |
| -0.194 |
| #NUM!  |
| 0.721  |
| 0.212  |
| -0.324 |
| 0.207  |
| 0.531  |
| 0.318  |
| 0.680  |
| -1.461 |
| 0.144  |
| 0.387  |
| 0.033  |
| 0.296  |
| 0.007  |
| 0.770  |
| 0.377  |
| 0.332  |
| 0.626  |
| 0.292  |
| 0.016  |
| 0.761  |
| 0.386  |
| 0.185  |
| 0.957  |
| 0.644  |
| 0.358  |
| 0.666  |
| 0.029  |
| -0.535 |
| #NUM!  |
| -0.530 |
| 1.177  |
| -0.996 |
| #NUM!  |
| 0.330  |
| 0.011  |
| 0.820  |
| 0.197  |
| 0.274  |
| 0.095  |



|        |
|--------|
| 0.348  |
| -0.623 |
| 0.219  |
| 0.133  |
| 0.192  |
| 0.274  |
| 0.570  |
| 0.369  |
| 1.002  |
| 0.081  |
| 0.602  |
| -1.177 |
| 0.181  |
| 1.427  |
| 0.426  |
| #NUM!  |
| -0.023 |
| 0.205  |
| 0.154  |
| -0.019 |
| 1.017  |
| 0.495  |
| -0.958 |
| 0.564  |
| -0.566 |
| #NUM!  |
| 1.470  |
| -1.967 |
| #NUM!  |
| 0.251  |
| 0.414  |
| -0.076 |
| -0.559 |
| 0.438  |
| 2.247  |
| -0.031 |
| 0.272  |
| #NUM!  |
| -0.302 |
| #NUM!  |
| 0.844  |
| 0.123  |
| #NUM!  |
| 0.547  |
| 0.241  |
| 0.092  |
| 0.385  |
| 0.592  |
| -0.048 |
| 0.320  |
| 0.881  |

|        |
|--------|
| -0.270 |
| 0.302  |
| -0.016 |
| -0.009 |
| -0.667 |
| #NUM!  |
| -0.484 |
| -0.317 |
| 0.085  |
| 0.093  |
| 0.689  |
| -0.315 |
| -2.407 |
| 1.155  |
| 0.285  |
| 0.372  |
| #NUM!  |
| 0.344  |
| 0.392  |
| -0.525 |
| 0.560  |
| 0.754  |
| -0.642 |
| -0.238 |
| #NUM!  |
| -0.409 |
| -0.202 |
| 0.021  |
| #NUM!  |
| -0.298 |
| 0.645  |
| -0.188 |
| #NUM!  |
| 0.209  |
| -1.256 |
| 0.913  |
| 0.419  |
| 0.213  |
| -0.572 |
| #NUM!  |
| 0.516  |
| -0.494 |
| -0.565 |
| #NUM!  |
| 0.536  |
| -1.389 |
| 0.237  |
| -0.199 |
| #NUM!  |
| -0.957 |
| -0.260 |

|        |
|--------|
| 0.313  |
| 0.116  |
| 0.358  |
| #NUM!  |
| 0.295  |
| #NUM!  |
| -0.727 |
| #NUM!  |
| #NUM!  |
| #NUM!  |
| -0.524 |
| -1.774 |
| #NUM!  |
| 1.757  |
| -0.027 |
| 0.018  |
| 0.027  |
| -0.134 |
| -0.190 |
| 0.123  |
| 0.480  |
| 0.281  |
| 0.367  |
| #NUM!  |
| 0.552  |
| -0.572 |
| 0.041  |
| -0.034 |
| 2.740  |
| -0.074 |
| 0.002  |
| 0.478  |
| 0.417  |
| 0.777  |
| 1.100  |
| -0.496 |
| -0.370 |
| -0.293 |
| -0.572 |
| 0.252  |
| 0.057  |
| 0.167  |
| 1.409  |
| 0.969  |
| 0.144  |
| 1.477  |
| 0.053  |
| 1.108  |
| 0.015  |
| #NUM!  |
| -0.111 |

|        |
|--------|
| 0.742  |
| #NUM!  |
| 0.501  |
| 0.664  |
| #NUM!  |
| -0.040 |
| -0.089 |
| -0.923 |
| #NUM!  |
| -0.627 |
| -0.326 |
| 1.012  |
| #NUM!  |
| -0.460 |
| -0.093 |
| -0.219 |
| 0.123  |
| -0.449 |
| 0.958  |
| 0.104  |
| 0.550  |
| -0.184 |
| -0.234 |
| -0.067 |
| -0.247 |
| -0.494 |
| 0.248  |
| #NUM!  |
| 0.024  |
| 0.095  |
| 0.161  |
| -0.157 |
| #NUM!  |
| 0.465  |
| #NUM!  |
| 0.262  |
| #NUM!  |
| -0.185 |
| -0.008 |
| 0.259  |
| -0.258 |
| -0.429 |
| -0.548 |
| 0.029  |
| 0.100  |
| -0.240 |
| -0.213 |
| -1.112 |
| #NUM!  |
| #NUM!  |
| #NUM!  |

|        |
|--------|
| 0.140  |
| 0.420  |
| 0.141  |
| 0.145  |
| #NUM!  |
| -0.090 |
| -0.057 |
| -0.164 |
| #NUM!  |
| #NUM!  |
| 0.053  |
| 0.382  |
| 0.491  |
| 0.762  |
| -0.360 |
| -0.517 |
| -0.447 |
| 0.025  |
| 0.194  |
| 0.835  |
| 0.119  |
| 0.294  |
| 0.570  |
| 0.569  |
| 0.205  |
| -1.450 |
| 0.558  |
| 0.437  |
| 0.363  |
| -0.133 |
| 0.653  |
| 0.107  |
| 0.154  |
| 0.686  |
| #NUM!  |
| 0.001  |
| 0.375  |
| -0.016 |
| 1.501  |
| #NUM!  |
| -1.549 |
| -1.481 |
| -0.017 |
| 0.634  |
| 0.085  |
| 0.332  |
| 0.317  |
| -0.080 |
| 0.272  |
| 0.369  |
| 0.478  |

|        |
|--------|
| 0.578  |
| 0.664  |
| -0.330 |
| 0.696  |
| -0.102 |
| 0.298  |
| -0.295 |
| 2.365  |
| 0.963  |
| 0.286  |
| 0.347  |
| #NUM!  |
| 0.077  |
| #NUM!  |
| 0.001  |
| 0.332  |
| -0.483 |
| -0.532 |
| 0.396  |
| 0.831  |
| -0.269 |
| 0.147  |
| 0.252  |
| -0.126 |
| 0.457  |
| 0.370  |
| 1.292  |
| 0.422  |
| 1.098  |
| 0.443  |
| -0.002 |
| 0.004  |
| 0.040  |
| 0.262  |
| 0.129  |
| #NUM!  |
| -0.312 |
| 0.081  |
| 0.601  |
| 0.259  |
| #NUM!  |
| -0.539 |
| 0.669  |
| 1.599  |
| -0.270 |
| #NUM!  |
| 0.112  |
| #NUM!  |
| -0.984 |
| -0.135 |
| -1.728 |

|        |
|--------|
| 1.379  |
| -0.155 |
| 0.432  |
| -0.224 |
| 0.047  |
| -0.267 |
| -0.290 |
| 0.476  |
| -0.033 |
| 0.689  |
| 0.213  |
| 1.144  |
| 0.128  |
| -0.124 |
| -0.435 |
| #NUM!  |
| -0.043 |
| 0.413  |
| 0.807  |
| 0.570  |
| 0.317  |
| 0.213  |
| 0.312  |
| 0.124  |
| #NUM!  |
| 0.074  |
| 0.588  |
| 0.084  |
| 0.041  |
| -0.304 |
| 0.540  |
| #NUM!  |
| #NUM!  |
| 0.082  |
| -0.364 |
| 0.940  |
| 0.611  |
| 0.554  |
| 0.385  |
| 0.291  |
| #NUM!  |
| -0.184 |
| -0.039 |
| -0.401 |
| #NUM!  |
| -0.481 |
| 0.352  |
| 0.253  |
| -0.185 |
| -0.115 |
| 0.282  |

|        |
|--------|
| 0.375  |
| 0.165  |
| 0.270  |
| 0.308  |
| 0.651  |
| 0.206  |
| 0.286  |
| -0.174 |
| -0.028 |
| -0.051 |
| 0.423  |
| 0.092  |
| 1.518  |
| 2.242  |
| 0.166  |
| 0.434  |
| 0.059  |
| 0.095  |
| 0.090  |
| -0.672 |
| 0.148  |
| 0.067  |
| #NUM!  |
| -0.055 |
| 0.244  |
| 0.576  |
| -0.432 |
| 1.188  |
| 1.451  |
| 0.400  |
| 0.711  |
| 0.883  |
| 0.583  |
| -0.008 |
| 0.553  |
| 0.627  |
| -0.019 |
| 0.132  |
| -0.019 |
| -0.534 |
| 0.585  |
| 0.803  |
| -0.009 |
| 1.225  |
| -0.989 |
| #NUM!  |
| 0.558  |
| -0.157 |
| 0.515  |
| 0.006  |
| 0.197  |



|        |
|--------|
| -0.374 |
| 0.632  |
| -0.135 |
| 0.850  |
| -0.236 |
| 0.933  |
| 0.065  |
| 1.202  |
| -0.226 |
| 0.253  |
| 0.676  |
| -0.283 |
| 0.507  |
| #NUM!  |
| 0.494  |
| -0.318 |
| 1.798  |
| 0.434  |
| #NUM!  |
| 0.450  |
| 0.251  |
| -0.383 |
| 0.765  |
| -0.965 |
| -0.133 |
| 0.690  |
| 0.617  |
| 0.255  |
| 0.071  |
| 0.292  |
| 0.347  |
| -0.613 |
| 0.180  |
| -0.238 |
| 0.176  |
| -1.291 |
| 2.027  |
| -0.344 |
| -1.732 |
| 0.295  |
| 0.893  |
| 0.320  |
| #NUM!  |
| 0.569  |
| #NUM!  |
| -0.006 |
| #NUM!  |
| 0.417  |
| 0.347  |
| #NUM!  |
| 0.721  |

|        |
|--------|
| 0.581  |
| #NUM!  |
| #NUM!  |
| 0.296  |
| 0.405  |
| -0.669 |
| #NUM!  |
| -0.422 |
| -0.534 |
| -0.418 |
| -0.172 |
| -0.768 |
| 0.316  |
| -3.735 |
| -0.141 |
| 0.261  |
| 0.871  |
| -1.247 |
| 1.394  |
| 0.188  |
| -0.178 |
| -0.893 |
| #NUM!  |
| 0.477  |
| -0.069 |
| 0.389  |
| 0.036  |
| -0.136 |
| 0.348  |
| 0.283  |
| 0.334  |
| 0.263  |
| 0.043  |
| 0.158  |
| 0.013  |
| 1.087  |
| 0.354  |
| -0.768 |
| -1.161 |
| 0.078  |
| -0.260 |
| 0.143  |
| 0.568  |
| 0.083  |
| 0.758  |
| 0.100  |
| 0.892  |
| 0.897  |
| 0.920  |
| 1.261  |
| -0.072 |

|        |
|--------|
| -0.501 |
| 1.262  |
| #NUM!  |
| #NUM!  |
| 0.086  |
| -0.831 |
| -0.046 |
| -0.672 |
| #NUM!  |
| 0.271  |
| 0.207  |
| 0.297  |
| 0.493  |
| -0.042 |
| 0.500  |
| -1.365 |
| 0.406  |
| -0.471 |
| 1.317  |
| -0.272 |
| -1.101 |
| 0.327  |
| 0.082  |
| 1.674  |
| 0.182  |
| 0.588  |
| -0.384 |
| 0.338  |
| -1.396 |
| #NUM!  |
| -0.016 |
| 0.307  |
| -0.075 |
| #NUM!  |
| 0.400  |
| -0.142 |
| #NUM!  |
| -1.445 |
| #NUM!  |
| 0.369  |
| 1.656  |
| 1.130  |
| 0.346  |
| -0.813 |
| -0.038 |
| -0.143 |
| 0.079  |
| 0.722  |
| -0.265 |
| -0.177 |
| -0.022 |

|        |
|--------|
| 0.393  |
| #NUM!  |
| -0.542 |
| -1.097 |
| -0.418 |
| #NUM!  |
| 0.060  |
| #NUM!  |
| 0.242  |
| -1.761 |
| 0.410  |
| -0.080 |
| 0.088  |
| 0.339  |
| 0.278  |
| 0.133  |
| -0.422 |
| -0.257 |
| 0.105  |
| 0.038  |
| 0.255  |
| 0.125  |
| -0.160 |
| -0.410 |
| 0.490  |
| 0.323  |
| 0.422  |
| 0.141  |
| -0.329 |
| -0.562 |
| 0.655  |
| -0.306 |
| 0.335  |
| 0.785  |
| -0.904 |
| 0.403  |
| 0.028  |
| -0.769 |
| 0.213  |
| 1.004  |
| 0.035  |
| 0.373  |
| -0.311 |
| -0.165 |
| 0.160  |
| -0.034 |
| 1.313  |
| -0.215 |
| -0.216 |
| -0.296 |
| -0.363 |

|        |
|--------|
| -0.406 |
| 0.298  |
| -0.129 |
| 0.387  |
| #NUM!  |
| 2.497  |
| -0.260 |
| 0.319  |
| 0.560  |
| 0.358  |
| 0.179  |
| -0.219 |
| 0.643  |
| #NUM!  |
| -0.190 |
| 0.272  |
| 0.190  |
| #NUM!  |
| 0.025  |
| -0.204 |
| 0.176  |
| 0.366  |
| 0.292  |
| 0.323  |
| 1.710  |
| -0.223 |
| -0.353 |
| -0.441 |
| 1.307  |
| 0.291  |
| -0.623 |
| #NUM!  |
| -0.852 |
| 0.913  |
| 0.252  |
| -0.966 |
| 0.726  |
| -1.693 |
| -1.077 |
| -0.323 |
| -0.083 |
| -0.801 |
| #NUM!  |
| 0.122  |
| -0.215 |
| -0.140 |
| -0.745 |
| -0.959 |
| -0.319 |
| 0.278  |
| 0.294  |

|        |
|--------|
| -0.503 |
| -0.145 |
| 0.195  |
| 1.688  |
| 1.340  |
| #NUM!  |
| -1.459 |
| 0.546  |
| 2.301  |
| -0.471 |
| #NUM!  |
| #NUM!  |
| #NUM!  |
| 0.137  |
| #NUM!  |
| -0.305 |
| 0.036  |
| 0.551  |
| 0.870  |
| 0.320  |
| -0.554 |
| 0.065  |
| 0.974  |
| -0.283 |
| #NUM!  |
| -0.365 |
| 0.814  |
| -0.117 |
| #NUM!  |
| #NUM!  |
| 0.650  |
| #NUM!  |
| #NUM!  |
| 0.183  |
| 0.380  |
| 1.584  |
| -0.055 |
| #NUM!  |
| #NUM!  |
| -0.275 |
| 0.667  |
| 0.279  |
| #NUM!  |
| 1.378  |
| #NUM!  |
| -0.660 |
| 0.264  |
| 0.349  |
| 0.329  |
| 0.040  |
| -0.818 |

|        |
|--------|
| -0.233 |
| -0.235 |
| 0.084  |
| #NUM!  |
| 0.308  |
| 0.516  |
| 0.006  |
| 0.226  |
| -0.382 |
| -0.318 |
| 0.052  |
| -0.060 |
| 0.274  |
| 0.498  |
| -0.520 |
| 0.091  |
| 0.808  |
| 0.477  |
| 0.471  |
| 0.622  |
| -0.483 |
| 0.027  |
| -0.184 |
| 0.413  |
| 0.289  |
| -0.983 |
| 0.118  |
| 0.471  |
| -0.406 |
| #NUM!  |
| 0.054  |
| 0.394  |
| 0.340  |
| 0.097  |
| -0.251 |
| -0.010 |
| 0.300  |
| 0.297  |
| -0.239 |
| 0.001  |
| 0.351  |
| -0.016 |
| -0.107 |
| 0.250  |
| 0.329  |
| -0.383 |
| 0.399  |
| -0.524 |
| 0.997  |
| 0.524  |
| 0.127  |
| -0.104 |

|        |
|--------|
| -0.391 |
| -1.863 |
| -1.735 |
| -0.779 |
| 0.497  |
| -0.383 |
| -0.573 |
| #NUM!  |
| -0.180 |
| 0.640  |
| 0.613  |
| #NUM!  |
| 0.316  |
| 0.238  |
| #NUM!  |
| 0.214  |
| 0.302  |
| 0.453  |
| -0.154 |
| -0.357 |
| -0.491 |
| 0.212  |
| 0.141  |
| #NUM!  |
| 0.197  |
| -0.167 |
| -0.565 |
| 0.311  |
| 0.478  |
| -0.981 |
| 1.048  |
| 0.461  |
| -0.042 |
| -0.105 |
| 0.146  |
| 0.674  |
| 0.195  |
| 0.045  |
| -0.250 |
| 0.012  |
| -0.092 |
| 0.352  |
| 0.892  |
| 0.084  |
| -0.582 |
| 0.127  |
| #NUM!  |
| #NUM!  |
| 0.155  |
| 0.206  |
| -0.810 |



|        |
|--------|
| -0.604 |
| -0.238 |
| 0.357  |
| 0.372  |
| -0.084 |
| -0.814 |
| -0.659 |
| 1.039  |
| 0.034  |
| 0.581  |
| 0.491  |
| 0.339  |
| 0.117  |
| -0.274 |
| 0.043  |
| 0.570  |
| -0.055 |
| 0.196  |
| -0.918 |
| -0.209 |
| #NUM!  |
| -0.052 |
| 0.156  |
| 0.150  |
| -0.095 |
| 0.016  |
| 0.199  |
| -0.234 |
| 0.481  |
| 0.167  |
| -0.283 |
| #NUM!  |
| -0.755 |
| -0.186 |
| #NUM!  |
| 2.247  |
| -0.554 |
| 0.025  |
| 0.360  |
| -0.478 |
| 0.008  |
| -0.874 |
| -0.649 |
| 1.060  |
| #NUM!  |
| -0.122 |
| 0.003  |
| 0.289  |
| 0.474  |
| 0.185  |
| 0.530  |

|        |
|--------|
| -0.168 |
| 0.678  |
| #NUM!  |
| -0.378 |
| -0.021 |
| 0.358  |
| 1.653  |
| -1.500 |
| 0.207  |
| -0.374 |
| -0.375 |
| 0.194  |
| 0.671  |
| 0.173  |
| -0.125 |
| 0.182  |
| 0.086  |
| 0.718  |
| 0.137  |
| 1.821  |
| 0.466  |
| 0.676  |
| 0.196  |
| #NUM!  |
| #NUM!  |
| -0.056 |
| -0.020 |
| -0.141 |
| 0.709  |
| 0.294  |
| -0.091 |
| 0.107  |
| -0.829 |
| 1.074  |
| 0.243  |
| 0.585  |
| -2.421 |
| 0.447  |
| 0.267  |
| 1.294  |
| -0.253 |
| -0.202 |
| 0.357  |
| 0.276  |
| 0.106  |
| 0.161  |
| #NUM!  |
| 1.137  |
| 0.004  |
| 0.122  |
| 0.302  |

|        |
|--------|
| 0.466  |
| 0.452  |
| -0.344 |
| 0.273  |
| -0.371 |
| 0.539  |
| #NUM!  |
| 0.541  |
| 0.077  |
| 0.290  |
| 0.573  |
| 0.979  |
| 0.182  |
| 0.349  |
| 0.085  |
| 0.812  |
| 0.499  |
| -1.412 |
| 0.083  |
| 0.410  |
| -0.034 |
| -0.746 |
| 0.446  |
| 0.108  |
| #NUM!  |
| 0.020  |
| 0.067  |
| -0.312 |
| -0.607 |
| -0.222 |
| -0.035 |
| -0.345 |
| 0.174  |
| 0.077  |
| 0.285  |
| -0.189 |
| -0.081 |
| 0.413  |
| 0.071  |
| 0.067  |
| -0.300 |
| 0.087  |
| -0.180 |
| 0.146  |
| -0.302 |
| -0.919 |
| -0.161 |
| 0.666  |
| 1.132  |
| 1.376  |
| -0.283 |

|        |
|--------|
| -1.091 |
| #NUM!  |
| -0.661 |
| 0.234  |
| -0.741 |
| 0.377  |
| 0.388  |
| 0.736  |
| 0.352  |
| 0.142  |
| 0.314  |
| -0.218 |
| -0.188 |
| 0.564  |
| 0.477  |
| -0.583 |
| #NUM!  |
| 0.905  |
| 0.190  |
| 0.147  |
| -0.176 |
| 0.487  |
| -1.089 |
| -0.454 |
| -0.585 |
| #NUM!  |
| 0.397  |
| -0.002 |
| -0.405 |
| 0.277  |
| -0.624 |
| -0.217 |
| 0.513  |
| -0.125 |
| -0.145 |
| 0.320  |
| 0.479  |
| -0.281 |
| -0.479 |
| -1.019 |
| 0.540  |
| 0.280  |
| -0.969 |
| -0.630 |
| 0.416  |
| -0.356 |
| 0.407  |
| -0.248 |
| 0.625  |
| 0.695  |
| 0.655  |

|        |
|--------|
| 0.202  |
| -0.014 |
| 0.446  |
| 0.121  |
| 0.310  |
| 0.156  |
| 0.274  |
| 0.350  |
| 0.397  |
| 0.143  |
| 0.332  |
| 0.576  |
| 0.773  |
| 0.419  |
| 0.651  |
| 0.750  |
| 0.156  |
| 0.608  |
| 0.688  |
| 0.308  |
| 0.632  |
| 0.611  |
| 0.865  |
| 0.497  |
| 0.128  |
| 0.466  |
| 0.231  |
| 0.700  |
| 0.360  |
| 0.279  |
| #NUM!  |
| 0.749  |
| 0.076  |
| 0.738  |
| 0.354  |
| 0.098  |
| -0.162 |
| 0.076  |
| -0.327 |
| 0.390  |
| 0.180  |
| 0.318  |
| -0.773 |
| #NUM!  |
| -0.214 |
| -0.228 |
| 0.263  |
| 0.669  |
| -0.366 |
| -0.022 |
| 0.081  |

|        |
|--------|
| 0.256  |
| -0.143 |
| -0.029 |
| -0.346 |
| 0.437  |
| 0.268  |
| 0.117  |
| 0.265  |
| 0.257  |
| 0.178  |
| 1.437  |
| 0.332  |
| 1.437  |
| -0.528 |
| -0.015 |
| -0.134 |
| -0.215 |
| 0.373  |
| -1.392 |
| -0.482 |
| 0.512  |
| #NUM!  |
| 0.049  |
| 1.374  |
| 0.198  |
| -0.240 |
| 0.120  |
| 0.027  |
| -0.059 |
| -0.244 |
| 0.078  |
| 0.430  |
| -3.239 |
| 0.875  |
| 1.233  |
| -0.566 |
| 0.175  |
| -0.216 |
| 0.392  |
| -0.117 |
| 0.604  |
| 0.119  |
| -0.070 |
| 0.394  |
| -0.206 |
| 1.246  |
| 0.384  |
| 0.490  |
| 0.379  |
| 0.638  |
| 0.292  |

|        |
|--------|
| -0.047 |
| -0.366 |
| 0.265  |
| 0.327  |
| -0.231 |
| #NUM!  |
| 0.338  |
| 0.457  |
| 0.342  |
| 0.501  |
| 0.398  |
| 0.437  |
| 0.265  |
| 0.527  |
| 0.407  |
| 0.054  |
| 0.376  |
| 0.567  |
| 0.401  |
| 0.126  |
| 0.499  |
| -0.479 |
| 0.067  |
| -1.831 |
| 0.498  |
| #NUM!  |
| -0.866 |
| 0.354  |
| 0.081  |
| -0.059 |
| 0.087  |
| 0.656  |
| 0.080  |
| 0.079  |
| -0.419 |
| 0.566  |
| 0.339  |
| -0.359 |
| 0.575  |
| 0.025  |
| #NUM!  |
| -0.032 |
| -0.040 |
| 0.270  |
| 0.337  |
| 0.256  |
| 0.488  |
| 0.085  |
| 0.488  |
| -0.049 |
| 0.354  |
| 0.273  |

|        |
|--------|
| 0.268  |
| 0.059  |
| 0.401  |
| 0.465  |
| 0.337  |
| 0.041  |
| 0.296  |
| 0.135  |
| 0.359  |
| -0.745 |
| 0.270  |
| -0.031 |
| 0.321  |
| 0.499  |
| -0.109 |
| 0.276  |
| 0.310  |
| 0.276  |
| 0.192  |
| 0.495  |
| -0.649 |
| 0.461  |
| 1.000  |
| 0.083  |
| 0.269  |
| 1.340  |
| 0.655  |
| -0.229 |
| 0.533  |
| 0.234  |
| 0.072  |
| 0.313  |
| 0.242  |
| 0.233  |
| 0.431  |
| 0.069  |
| 0.029  |
| 0.453  |
| 0.040  |
| 0.433  |
| 0.315  |
| 0.159  |
| 0.289  |
| 0.601  |
| 0.338  |
| 0.129  |
| 0.559  |
| 2.971  |
| 0.202  |
| -0.449 |
| 0.411  |
| 0.525  |



|        |
|--------|
| 0.180  |
| 0.219  |
| 0.439  |
| 0.265  |
| 0.249  |
| 0.260  |
| 0.058  |
| 0.421  |
| 0.322  |
| 0.321  |
| 0.150  |
| 0.411  |
| 0.597  |
| -0.566 |
| 0.463  |
| -0.111 |
| 0.215  |
| 0.455  |
| 0.527  |
| -0.031 |
| 1.721  |
| 0.262  |
| -0.017 |
| 0.418  |
| 0.173  |
| -0.031 |
| 0.027  |
| #NUM!  |
| 0.144  |
| 0.009  |
| 0.394  |
| 0.300  |
| #NUM!  |
| 0.309  |
| 0.203  |
| 0.088  |
| 0.404  |
| 0.144  |
| 0.559  |
| 0.073  |
| 0.437  |
| -1.626 |
| 0.157  |
| 0.389  |
| 0.177  |
| 1.044  |
| 0.135  |
| 0.176  |
| 0.407  |
| -0.279 |
| 0.830  |
| 0.500  |

|        |
|--------|
| 0.571  |
| 0.020  |
| 0.373  |
| 0.263  |
| #NUM!  |
| 0.307  |
| 0.405  |
| 0.150  |
| 0.409  |
| 0.405  |
| 0.536  |
| 0.322  |
| 0.786  |
| 0.349  |
| 0.540  |
| 0.399  |
| 0.708  |
| -0.269 |
| 2.694  |
| 0.787  |
| 0.360  |
| 0.187  |
| 0.802  |
| 0.076  |
| 0.519  |
| 0.372  |
| 0.279  |
| 0.308  |
| 0.086  |
| 0.210  |
| 0.244  |
| 0.381  |
| 0.174  |
| 0.247  |
| 0.361  |
| 0.121  |
| 0.257  |
| 0.108  |
| 0.119  |
| 0.394  |
| 0.720  |
| 1.242  |
| 2.888  |
| 0.425  |
| 0.468  |
| 0.195  |
| 0.941  |
| 0.212  |
| 0.865  |
| 1.133  |
| 0.350  |
| 0.330  |

|        |
|--------|
| 0.157  |
| 0.654  |
| 0.217  |
| 0.201  |
| 0.254  |
| 0.451  |
| 0.189  |
| 0.455  |
| 0.460  |
| 0.000  |
| 0.347  |
| -0.026 |
| 0.237  |
| 0.319  |
| 0.378  |
| 0.055  |
| -0.480 |
| 0.380  |
| 0.200  |
| -0.282 |
| 0.321  |
| -0.301 |
| 0.244  |
| -0.079 |
| 0.443  |
| #NUM!  |
| 0.592  |
| 0.316  |
| -0.223 |
| 0.194  |
| -0.272 |
| 0.721  |
| 0.133  |
| 0.396  |
| 0.379  |
| 0.130  |
| 0.633  |
| 0.363  |
| 0.643  |
| 0.689  |
| 0.562  |
| 0.055  |
| #NUM!  |
| -0.005 |
| 0.577  |
| 0.282  |
| 0.588  |
| 0.180  |
| 0.242  |
| 1.922  |
| 0.247  |
| 0.890  |

|        |
|--------|
| 0.606  |
| 0.370  |
| 0.784  |
| 0.080  |
| 0.797  |
| #NUM!  |
| 0.479  |
| 0.338  |
| 0.413  |
| 0.214  |
| 0.133  |
| 0.482  |
| -0.338 |
| -0.222 |
| 0.417  |
| 0.280  |
| 0.277  |
| -0.050 |
| -0.124 |
| 0.459  |
| 0.029  |
| 0.111  |
| #NUM!  |
| -0.152 |
| 0.598  |
| -0.172 |
| -0.474 |
| 0.502  |
| 0.298  |
| 0.067  |
| 0.453  |
| -0.329 |
| 0.451  |
| -0.483 |
| -0.489 |
| 0.167  |
| 0.321  |
| 0.158  |
| 0.253  |
| 0.139  |
| 0.257  |
| -0.232 |
| 0.454  |
| 0.558  |
| 0.719  |
| 0.115  |
| -0.376 |
| 0.145  |
| -0.505 |
| -0.880 |
| 0.429  |
| 0.176  |

|        |
|--------|
| -0.219 |
| 0.228  |
| 0.475  |
| 0.168  |
| 0.176  |
